# Supplementary material for: Regio- and diastereoselective Pd-catalyzed aminochlorocyclization of allylic carbamates: scope, derivatization, and mechanism
Source: Royal Society of Chemistry journal article supplement (doi:10.1039/d1ob00670c), 2021-01-01

## Supporting Information for

### Regio- and Diastereoselective Pd-Catalyzed Aminochlorocyclization of Allylic Carbamates: Scope, Derivatization, and Mechanism

Bruna Papa Spadafora,<sup>a</sup> Francisco Wanderson Moreira Ribeiro,<sup>b,c</sup> Jullyane Emi Matsushima,<sup>a</sup> Elaine Miho Ariga,<sup>a</sup> Isaac Omari,<sup>c</sup> Priscila Machado Arruda Soares,<sup>a</sup> Diogo de Oliveira-Silva,<sup>a</sup> Elisângela Vinhato,<sup>a</sup> J. Scott McIndoe,<sup>c</sup> Thiago Carita Correra,<sup>b</sup> and Alessandro Rodrigues\*<sup>a</sup>

<sup>a</sup> Department of Chemistry, Federal University of Sao Paulo, UNIFESP. Prof. Artur Riedel Street 275, lab 10, 09972-270, Diadema, SP – Brazil.

E-mail: alessandro.rodrigues@unifesp.br

<sup>b</sup> Department of Fundamental Chemistry, Institute of Chemistry, University of Sao Paulo, Av. Prof. Lineu Prestes, 748, 05508-000, Sao Paulo, SP, Brazil.

<sup>c</sup> Department of Chemistry, University of Victoria, P. O. Box 3065, Victoria, BC V8W 3V6, Canada.

#### TABLE OF CONTENTS

|                                                                                                   |          |
|---------------------------------------------------------------------------------------------------|----------|
| <b>1. General Experimental Details</b>                                                            | S2       |
| <b>2. Reaction Sequence for the Preparation of Allylic Carbamates 1a-s</b>                        | S3       |
| <b>3. Experimental Procedures</b>                                                                 | S3-S19   |
| <b>3.1. General Procedure for the Preparation of Substrates Allylic Esters 8b-l</b>               | S3-S5    |
| <b>3.2. General Procedure for the Preparation of Substrates of Allylic Alcohols 9b-l,r</b>        | S5-S7    |
| <b>3.3. General Procedures for the Preparation of Allylic Carbamates 1a-s</b>                     | S7-S12   |
| <b>3.4. General Procedures for the Synthesis and Characterization Data of Oxazolidinones 2a-s</b> | S12-S17  |
| <b>4. Derivatization Reactions of 2a and Characterization Data</b>                                | S18-S19  |
| <b>5. Complete Details of Optimization of Reaction Conditions</b>                                 | S20-S22  |
| <b>6. <sup>1</sup>H NMR Titration Experiments Procedure (at 25 °C)</b>                            | S23      |
| <b>7. Relative Stereochemistry Determination</b>                                                  | S24-S28  |
| <b>8. Real-time Reaction Monitoring</b>                                                           | S29-S31  |
| <b>9. Computational Details</b>                                                                   | S32      |
| <b>10. References</b>                                                                             | S33-S34  |
| <b>11. Cartesian Coordinates (Å) and Energies (hartree) of all the Structures</b>                 | S35-S52  |
| <b>12. Copies of NMR Spectra</b>                                                                  | S53-S209 |

---

## 1. General Experimental Details:

Reactions were performed in oven-dried glassware using syringe-septum cap techniques under an inert atmosphere of Ar. Reaction mixtures were magnetically stirred unless otherwise stated. All commercially obtained reagents were used as received. The solvents were obtained from commercial suppliers and used as received or were treated when necessary according to the literature.<sup>1</sup> All substrates whose syntheses were not described were either obtained from commercial suppliers or prepared using the referenced literature procedures. Analytical thin layer chromatography was performed on pre-coated silica gel 60 F-254 plates (particle size 40-55 micron, 230-400 mesh) and visualized by a UV lamp, by staining with iodine, or by ninhydrin, or by sulfuric vanillin followed by a heating using a heat gun. Column chromatography was performed using silica gel (Silicycle - SiliaFlash®) P60, 230-400 mesh and compressed by air pressure with commercial grade solvents. Melting points were recorded with a Büchi M-569 apparatus in open capillary tubes and are uncorrected. NMR spectra were recorded at 300 MHz (<sup>1</sup>H) and 75 MHz (<sup>13</sup>C) on a Bruker Avance III 300 MHz spectrometer at 298 K. Chemical shifts are reported in ppm relative to tetramethylsilane (TMS) as internal standard. The following abbreviations are used in reporting NMR data: s, singlet; brs, broad singlet; d, doublet; t, triplet; q, quartet; p, pentet; dd, doublet of doublets; ddd, doublet of doublets of doublets; dt, doublet of triplets; appt, apparent triplet; m, multiplet. Infrared spectra were measured on a Shimadzu FT/IR Prestige-21 spectrometer using KBr pellets in 4000-400 cm<sup>-1</sup> region. High-resolution mass spectra (HRMS) were measured on a Bruker micrOTOF-QII by ESI spectrometer.

## 2. Reaction Sequence for the Preparation of Allylic Carbamates 1a-s.

Scheme S1 represents the synthetic route for the preparation of starting materials. For detailed experimental procedures, characterization data and yields, see the below.

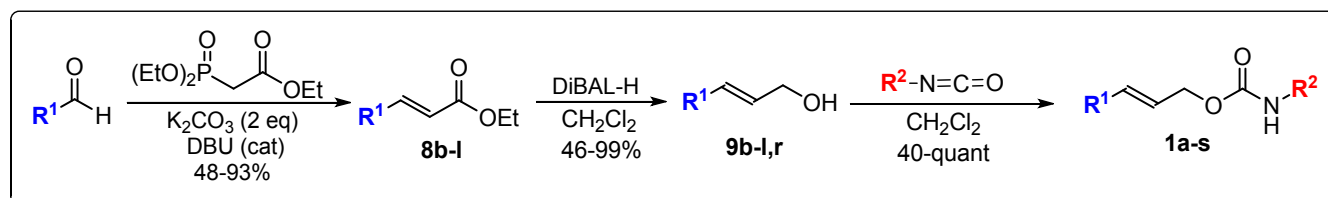

**Scheme S1.** Synthesis of oxazolidinones (**1a-s**) from corresponding aldehydes.

## 3. Experimental Procedures:

**3.1. General Procedure for the Preparation of Substrates Allylic Esters 8b-l.** Esters (**8b-l**) were prepared according to the previously reported procedure by Ando and Yamada.<sup>2</sup> A 25 mL round bottom flask equipped with a stir bar was charged with the corresponding aldehyde (30.0 mmol, 1.0 equiv), triethyl phosphonoacetate (7.40 g, 33.0 mmol, 1.1 equiv) and DBU (1,8-diazabicyclo[5.4.0]undec-7-ene) (137 mg, 0.9 mmol, 0.03 equiv), the reaction mixture was stirred vigorously by 10 minutes. Potassium carbonate (8.29 g, 60.0 mmol, 2.0 equiv) was added, and the resulting mixture was stirred for 24 h at room temperature. Then, the reaction was quenched with water (30 mL) and extracted with EtOAc (3x50 mL). The combined extracts were washed with brine, dried (Na<sub>2</sub>SO<sub>4</sub>), and concentrated to provide the crude allylic ester. Purification was carried out by flash column chromatography (silica gel, hexanes/EtOAc).

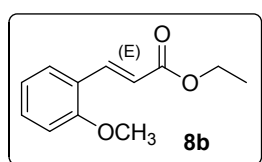

(*2E*)-3-(2-Methoxyphenyl) ethyl ester (**8b**) - (CAS: 24393-54-2). Compound **8b** was obtained in 93% (5.75 g) yield according to the general procedure as a colorless oil; *E:Z* = 98:2; <sup>1</sup>H NMR (300 MHz, CDCl<sub>3</sub>, ppm): δ 7.99 (d, *J* = 16.1 Hz, 1H), 7.51 (d, *J* = 7.7 Hz, 1H), 7.35 (t, *J* = 7.7 Hz, 1H), 6.98-6.90 (m, 2H), 6.53 (d, *J* = 16.1 Hz, 1H), 4.26 (q, *J* = 7.1 Hz, 2H), 3.89 (s, 3H), 1.34 (t, *J* = 7.1 Hz, 3H); <sup>13</sup>C NMR (75 MHz, CDCl<sub>3</sub>, ppm): δ 167.53, 158.33, 140.02, 131.41, 128.92, 123.45, 120.69, 118.80, 111.12, 60.34, 55.45, 14.37; IR (neat): 2978, 1703, 1629, 1590, 1157, 1024, 748 cm<sup>-1</sup>. Consistent with published data.<sup>3</sup>

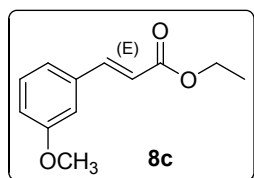

(*2E*)-3-(3-Methoxyphenyl) ethyl ester (**8c**) - (CAS: 24393-55-3). Compound **8c** was obtained in 86% (5.32 g) yield according to the general procedure as a colorless oil; *E:Z* = 99:1; <sup>1</sup>H NMR (300 MHz, CDCl<sub>3</sub>, ppm): δ 7.64 (d, *J* = 16.0 Hz, 1H), 7.28 (t, *J* = 7.9 Hz, 1H), 7.10 (d, *J* = 7.9 Hz, 1H), 7.03 (s, 1H), 6.92 (dd, *J* = 8.2, 2.4 Hz, 1H), 6.42 (d, *J* = 16.0 Hz, 1H), 4.26 (q, *J* = 7.1 Hz, 2H), 3.80 (s, 3H), 1.33 (t, *J* = 7.1 Hz, 3H); <sup>13</sup>C NMR (75 MHz, CDCl<sub>3</sub>, ppm): δ 166.91, 159.92, 144.50, 135.85, 129.87, 120.74, 118.58, 116.10, 112.93, 60.50, 55.25, 14.33; IR (neat): 3059, 2980, 1712, 1639, 1598, 1178, 1041, 785, 680 cm<sup>-1</sup>. Consistent with published data.<sup>4</sup>

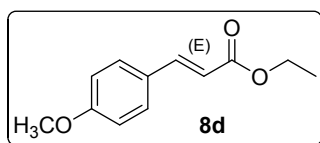

(2E)-3-(4-Methoxyphenyl) ethyl ester (**8d**) - (CAS: 24393-56-4). Compound **8d** was obtained in 93% (5.75 g) yield according to the general procedure as a colorless solid; mp: 47-49 °C; *E:Z* = 99:1; <sup>1</sup>H NMR (300 MHz, CDCl<sub>3</sub>, ppm): δ 7.64 (d, *J* = 16.0 Hz, 1H), 7.47 (d, *J* = 7.6 Hz, 2H), 6.90 (d, *J* = 7.6 Hz, 2H), 6.31 (d, *J* = 16.0 Hz, 2H), 4.25 (q, *J* = 7.1 Hz, 2H), 3.83 (s, 3H), 1.33 (t, *J* = 7.1 Hz, 3H); <sup>13</sup>C NMR (75 MHz, CDCl<sub>3</sub>, ppm): δ 167.37, 161.34, 144.26, 129.70, 127.21, 115.76, 114.32, 60.34, 55.37, 14.36; IR (KBr): 2976, 1707, 1629, 1602, 1174, 1005, 831 cm<sup>-1</sup>. Consistent with published data.<sup>3</sup>

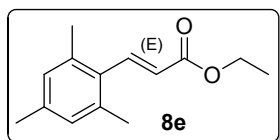

(2E)-2-Propanoic acid, 3-(2,4,6-trimethylphenyl) ethyl ester (**8e**) - (CAS: 84001-90-1). Compound **8e** was obtained in 48% (3.14 g) yield according to the general procedure as a white solid; mp: 35-36 °C; *E:Z* = 99:1; <sup>1</sup>H NMR (300 MHz, CDCl<sub>3</sub>, ppm): δ 7.84 (d, *J* = 16.4 Hz, 1H), 6.89 (s, 2H), 6.05 (d, *J* = 16.4 Hz, 1H), 4.27 (q, *J* = 7.1 Hz, 2H), 2.33 (s, 6H), 2.28 (s, 3H), 1.34 (t, *J* = 7.1 Hz, 3H); <sup>13</sup>C NMR (75 MHz, CDCl<sub>3</sub>, ppm): δ 167.06, 143.20, 138.28, 136.83, 130.98, 129.14, 123.21, 60.49, 21.10, 21.04, 14.33; IR (KBr): 2980, 2968, 1705, 1622, 1606, 1176, 852 cm<sup>-1</sup>. Consistent with published data.<sup>5</sup>

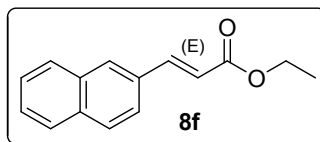

(2E)-3-(2-Naphthalenyl)-2-propenoic acid ethyl ester (**8f**) - (CAS: 114833-06-6). Compound **8f** was obtained in 92% (6.24 g) yield according to the general procedure as a white solid; mp: 67-68 °C; *E:Z* = 99:1; <sup>1</sup>H NMR (300 MHz, CDCl<sub>3</sub>, ppm): δ 7.92 (s, 1H), 7.84 (d, *J* = 16.0 Hz, 1H), 7.87-7.79 (m, 3H), 7.66 (dd, *J* = 8.6, 1.6 Hz, 1H), 7.54-7.46 (m, 2H), 6.54 (d, *J* = 16.0 Hz, 1H), 4.29 (q, *J* = 7.1 Hz, 2H), 1.36 (t, *J* = 7.1 Hz, 3H); <sup>13</sup>C NMR (75 MHz, CDCl<sub>3</sub>, ppm): δ 167.03, 144.60, 134.18, 133.27, 131.94, 129.87, 128.65, 128.54, 127.75, 127.18, 126.67, 123.47, 118.41, 60.50, 14.35; IR (KBr): 3055, 2976, 1707, 1633, 1593, 1037, 860, 821 cm<sup>-1</sup>. Consistent with published data.<sup>5</sup>

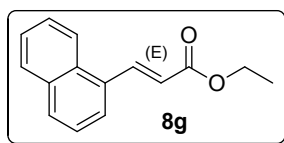

(2E)-3-(1-Naphthalenyl)-2-propenoic acid ethyl ester (**8g**) - (CAS: 98978-43-9). Compound **8g** was obtained in 73% (4.95 g) yield according to the general procedure as a colorless oil; *E:Z* = 99:1; <sup>1</sup>H NMR (300 MHz, CDCl<sub>3</sub>, ppm): δ 8.48 (d, *J* = 15.8 Hz, 1H), 8.10 (dd, *J* = 7.6, 1.5 Hz, 1H), 7.75 (d, *J* = 7.9 Hz, 2H), 7.61 (d, *J* = 7.2 Hz, 1H), 7.48-7.38 (m, 2H), 7.33 (dd, *J* = 7.9 Hz, 1H), 6.46 (d, *J* = 15.8 Hz, 1H), 4.27 (q, *J* = 7.1 Hz, 2H), 1.32 (t, *J* = 7.1 Hz, 3H); <sup>13</sup>C NMR (75 MHz, CDCl<sub>3</sub>, ppm): δ 166.51, 141.18, 133.34, 131.38, 131.08, 130.15, 128.39, 126.50, 125.86, 125.10, 124.63, 123.01, 120.51, 60.25, 14.09; IR (neat): 3059, 2980, 2968, 1712, 1683, 800, 775 cm<sup>-1</sup>. Consistent with published data.<sup>3</sup>

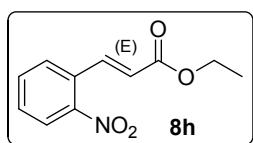

(2E)-3-(2-Nitrophenyl) acrylic acid ethyl ester (**8h**) - (CAS: 24393-59-7). Compound **8h** was obtained in 73% (4.84 g) yield according to the general procedure as a yellow solid; mp: 40-42 °C; *E:Z* = 92:8; <sup>1</sup>H NMR (300 MHz, CDCl<sub>3</sub>, ppm): δ 8.09 (d, *J* = 15.7 Hz, 1H), 8.02 (d, *J* = 8.0 Hz, 1H), 7.67-7.64 (m, 2H), 7.58-7.53 (m, 1H), 6.37 (d, *J* = 15.7 Hz, 1H), 4.28 (q, *J* = 7.1 Hz, 2H), 1.34 (t, *J* = 7.1 Hz, 3H); <sup>13</sup>C NMR (75 MHz, CDCl<sub>3</sub>, ppm): δ 165.78, 148.32, 139.80, 133.62, 130.50, 130.38, 129.14, 124.88, 123.29, 60.90, 14.27; IR (KBr): 3060, 2998, 1712, 1580, 1519, 1344, 758 cm<sup>-1</sup>. Consistent with published data.<sup>6</sup>

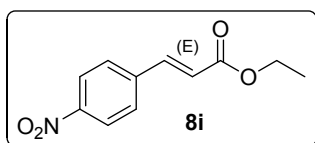

(2E)-3-(4-Nitrophenyl) acrylic acid ethyl ester (**8i**) - (CAS: 953-26-4). Compound **8i** was obtained in 82% (5.44 g) yield according to the general procedure as a brown solid; mp: 138-140 °C; *E:Z* = 93:7; <sup>1</sup>H NMR (300 MHz, CDCl<sub>3</sub>, ppm): δ 8.25 (d, *J* = 8.3, 2H), 7.72 (d, *J* = 16.2 Hz, 1H), 7.67 (d, *J* = 8.3 Hz, 2H), 6.56 (d, *J* = 16.2 Hz, 1H), 4.30 (q, *J* = 7.1 Hz, 2H), 1.36 (t, *J* = 7.1 Hz, 3H); <sup>13</sup>C NMR (75 MHz, CDCl<sub>3</sub>, ppm): δ 166.02, 148.54, 141.61, 140.65, 128.65, 124.18, 122.66, 61.01, 14.28; IR (KBr): 2997, 1712, 1610, 1593, 1514, 1340, 832 cm<sup>-1</sup>. Consistent with published data.<sup>3</sup>

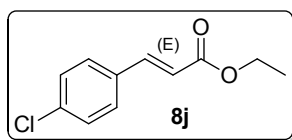

(*E*)-Ethyl 4-chlorocinnamate (**8j**) - (CAS: 24393-52-0). Compound **8j** was obtained in 86% (5.43 g) yield according to the general procedure as a colorless oil; *E*:*Z* = 99:1; <sup>1</sup>H NMR (300 MHz, CDCl<sub>3</sub>, ppm): δ 7.61 (d, *J* = 16.0 Hz, 1H), 7.43 (d, *J* = 8.5 Hz, 2H), 7.33 (d, *J* = 8.5 Hz, 2H), 6.33 (d, *J* = 16.0 Hz, 1H), 4.26 (q, *J* = 7.1 Hz, 2H), 1.33 (t, *J* = 7.1 Hz, 3H); <sup>13</sup>C NMR (75 MHz, CDCl<sub>3</sub>, ppm): δ 166.69, 143.09, 136.10, 132.96, 129.20, 129.15, 118.87, 60.60, 14.31. IR (neat): 3066, 2981, 1718, 1637, 1490, 821 cm<sup>-1</sup>. Consistent with published data.<sup>3</sup>

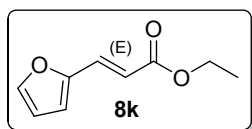

(*E*)-Ethyl 3-(2-furyl) acrylate (**8k**) - (CAS: 53282-12-5). Compound **8k** was obtained in 92% (4.58 g) yield according to the general procedure as a brown oil; *E*:*Z* = 99:1; <sup>1</sup>H NMR (300 MHz, CDCl<sub>3</sub>, ppm): δ 7.47 (s, 1H), 7.42 (d, *J* = 15.0 Hz, 1H), 6.66 (d, *J* = 3.3 Hz, 1H), 6.47-6.45 (m, 1H), 6.31 (d, *J* = 15.0 Hz, 1H), 4.24 (q, *J* = 7.1 Hz, 2H), 1.31 (t, *J* = 7.1 Hz, 3H); <sup>13</sup>C NMR (75 MHz, CDCl<sub>3</sub>, ppm): δ 167.08, 150.97, 144.69, 130.98, 115.97, 114.64, 112.25, 60.45, 14.32; IR (neat): 3100, 2981, 1712, 1641, 1590, 748 cm<sup>-1</sup>. Consistent with published data.<sup>3</sup>

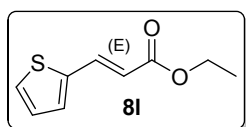

(*E*)-Ethyl 3-(2-thienyl) acrylate (**8l**) - (CAS: 70326-81-7). Compound **8l** was obtained in 87% (4.76 g) yield according to the general procedure as an orange oil; *E*:*Z* = 99:1; <sup>1</sup>H NMR (300 MHz, CDCl<sub>3</sub>, ppm): δ 8.0 (d, *J* = 15.6 Hz, 1H), 7.36 (d, *J* = 5.0 Hz, 1H), 7.24 (d, *J* = 3.6 Hz, 1H), 7.04 (m, 1H), 6.26 (d, *J* = 15.6 Hz, 1H), 4.25 (q, *J* = 7.1 Hz, 2H), 1.31 (t, *J* = 7.1 Hz, 3H); <sup>13</sup>C NMR (75 MHz, CDCl<sub>3</sub>, ppm): δ 166.87, 139.61, 137.04, 130.82, 128.35, 128.06, 117.04, 60.50, 14.33; IR (neat): 3105, 2980, 1712, 1625, 705 cm<sup>-1</sup>. Consistent with published data.<sup>3</sup>

**3.2. General Procedure for the Preparation of Substrates of Allylic Alcohols 9b-l,r.** Allylic alcohols (**9b-l,r**) were prepared according to the previously reported procedure.<sup>7</sup> A stirred solution of ester (**8b-l**) or aldehyde (**8r** – commercially available) (3.0 mmol, 1.0 equiv.) in anhydrous DCM was cooled in ice-water bath to 0 °C under an argon atmosphere. DIBAL-H (1.0 M in hexane, 5 mL, 5.0 mmol) was added dropwise to the cooled solution, the resultant mixture was stirred for 1 h and the reaction was quenched with saturated aqueous sodium potassium tartrate (15 mL) (Rochelle's salt). The mixture was stirred at ambient temperature for 2 h, and then extracted with Et<sub>2</sub>O (3x30 mL). The combined organic layer was washed with brine, dried over Na<sub>2</sub>SO<sub>4</sub>, and evaporated under reduced pressure. The residue was purified by flash column chromatography (silica gel, 1:1 EtOAc/Hexane) to give the desired allylic alcohol (**9b-l,r**).

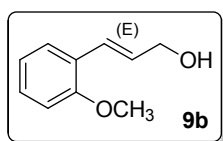

(2*E*)-3-(2-Methoxyphenyl)-2-propen-1-ol (**9b**) - (CAS: 114568-19-3). Compound **9b** was obtained in 62% (0.30 g) yield according to the general procedure as a yellow oil; <sup>1</sup>H NMR (300 MHz, CDCl<sub>3</sub>, ppm): δ 7.43 (dd, *J* = 7.6, 1.8 Hz, 1H), 7.22 (dt, *J* = 7.6, 1.8 Hz, 1H), 6.95-6.85 (m, 3H), 6.37 (dt, *J* = 16.0, 5.9 Hz, 1H), 4.31 (dd, *J* = 5.9, 1.8 Hz, 2H), 3.83 (s, 3H), 1.88 (bs, 1H); <sup>13</sup>C NMR (75 MHz, CDCl<sub>3</sub>, ppm): δ 156.75, 129.30, 128.76, 127.01, 126.16, 125.74, 120.69, 110.85, 64.19, 55.43; IR (neat): 3358 (brs), 3026, 2935, 1600, 1489, 1244, 752 cm<sup>-1</sup>. Consistent with published data.<sup>8</sup>

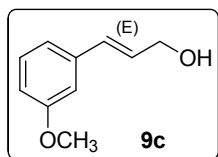

(2*E*)-3-(3-Methoxyphenyl)-2-propen-1-ol (**9c**) - (CAS: 125617-35-8). Compound **9c** was obtained in 80% (0.39 g) yield according to the general procedure as a yellow oil; <sup>1</sup>H NMR (300 MHz, CDCl<sub>3</sub>, ppm): δ 7.21 (t, *J* = 7.9 Hz, 1H), 6.97 (d, *J* = 7.9 Hz, 1H), 6.90 (brs, 1H), 6.79 (dd, *J* = 7.9, 2.0 Hz, 1H), 6.55 (d, *J* = 16.0 Hz, 1H), 6.33 (dt, *J* = 16.0, 5.6 Hz, 1H), 4.27 (d, *J* = 5.6 Hz, 2H), 3.79 (s, 3H); <sup>13</sup>C NMR (75 MHz, CDCl<sub>3</sub>, ppm): δ 159.79, 138.28, 130.74, 129.58, 129.04, 119.16, 113.25, 111.85, 63.37, 55.22; IR (neat): 3352 (brs), 3026, 2937, 1598, 1489, 1257, 1045, 771, 688 cm<sup>-1</sup>. Consistent with published data.<sup>8</sup>

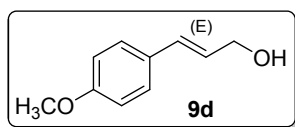

(*E*)-3-(4-Methoxyphenyl)-2-propen-1-ol (**9d**) - (CAS: 53484-50-7). Compound **9d** was obtained in 53% (0.26 g) yield according to the general procedure as a white solid; mp: 74-76 °C; <sup>1</sup>H NMR (300 MHz, CDCl<sub>3</sub>, ppm): δ 7.32 (d, *J* = 8.7 Hz, 2H), 6.86 (d, *J* = 8.7 Hz, 2H), 6.55 (d, *J* = 15.9 Hz, 1H), 6.24 (dt, *J* = 15.9, 6.0 Hz, 1H), 4.29 (d, *J* = 6.0 Hz, 2H), 3.81 (s, 3H); <sup>13</sup>C NMR (75 MHz, CDCl<sub>3</sub>, ppm): δ 159.32, 130.94, 129.45, 127.68, 126.29, 114.03, 63.89, 55.30; IR (KBr): 3356 (brs), 2914, 1604, 1512, 1244, 1026, 837 cm<sup>-1</sup>. Consistent with published data.<sup>8</sup>

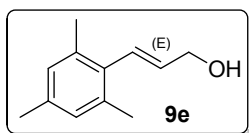

(*E*)-3-(2,4,6-Trimethylphenyl)-2-propen-1-ol (**9e**) - (CAS: 287929-73-1). Compound **9e** was obtained in 91% (0.48 g) yield according to the general procedure as a white solid; mp: 51-54 °C; <sup>1</sup>H NMR (300 MHz, CDCl<sub>3</sub>, ppm): δ 6.86 (s, 2H), 6.57 (d, *J* = 16.2 Hz, 1H), 5.87 (dt, *J* = 16.2, 5.7 Hz, 1H), 4.33 (d, *J* = 5.7 Hz, 2H), 2.27 (s, 9H); <sup>13</sup>C NMR (75 MHz, CDCl<sub>3</sub>, ppm): δ 136.28, 135.87, 133.42, 133.36, 128.84, 128.59, 64.13, 20.92, 20.89; IR (KBr): 3379 (brs), 2935, 1660, 1477, 1375, 974 cm<sup>-1</sup>. Consistent with published data.<sup>9</sup>

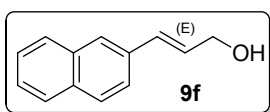

(*E*)-3-(Naphthalen-2-yl)prop-2-en-1-ol (**9f**) - (CAS: 114833-07-7). Compound **9f** was obtained in 97% (0.54 g) yield according to the general procedure as a white solid; mp: 111-112 °C; <sup>1</sup>H NMR (300 MHz, CDCl<sub>3</sub>, ppm): δ 7.80-7.76 (m, 3H), 7.72 (s, 1H), 7.59 (d, *J* = 8.5 Hz, 1H), 7.50-7.37 (m, 2H), 6.77 (d, *J* = 15.9 Hz, 1H), 6.48 (dt, *J* = 15.9, 5.7 Hz, 1H), 4.37 (dd, *J* = 5.7, 5.7 Hz, 2H); <sup>13</sup>C NMR (75 MHz, CDCl<sub>3</sub>, ppm): δ 134.12, 133.56, 133.03, 131.23, 128.86, 128.25, 127.98, 127.67, 126.47, 126.29, 125.93, 123.55, 63.80; IR (KBr): 3270, 3020, 1008, 738 cm<sup>-1</sup>. Consistent with published data.<sup>10</sup>

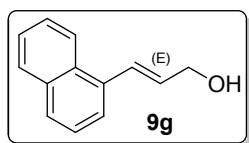

(*E*)-3-(Naphthalen-1-yl)prop-2-en-1-ol (**9g**) - (CAS: 98978-44-0). Compound **9g** was obtained in 99% (0.54 g) yield according to the general procedure as a yellow oil; <sup>1</sup>H NMR (300 MHz, CDCl<sub>3</sub>, ppm): δ 8.14-8.05 (m, 1H), 7.87-7.79 (m, 1H), 7.76 (d, *J* = 8.2 Hz, 1H), 7.56 (d, *J* = 7.1 Hz, 1H), 7.52-7.38 (m, 3H), 7.34 (d, *J* = 15.6 Hz, 1H), 6.36 (dt, *J* = 15.6, 5.6 Hz, 1H), 4.39 (d, *J* = 5.6 Hz, 2H), 1.93 (s, 1H); <sup>13</sup>C NMR (75 MHz, CDCl<sub>3</sub>, ppm): δ 134.42, 133.57, 131.76, 131.12, 128.51, 128.07, 127.99, 126.03, 125.77, 125.59, 123.88, 123.72, 63.83; IR (neat): 3352 (brs), 3057, 1585, 1091, 775 cm<sup>-1</sup>. Consistent with published data.<sup>11</sup>

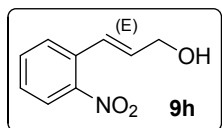

(*E*)-3-(2-Nitrophenyl)-2-propen-1-ol (**9h**) - (CAS: 130489-97-3). Compound **9h** was obtained in 46% (0.25 g) yield according to the general procedure as a brown oil; <sup>1</sup>H NMR (300 MHz, CDCl<sub>3</sub>, ppm): δ 7.89 (d, *J* = 8.1 Hz, 1H), 7.60-7.52 (m, 2H), 7.40-7.28 (m, 1H), 7.06 (d, *J* = 15.7 Hz, 1H), 6.34 (dt, *J* = 15.7, 5.3 Hz, 1H), 4.36 (d, *J* = 5.3 Hz, 2H); <sup>13</sup>C NMR (75 MHz, CDCl<sub>3</sub>, ppm): δ 147.78, 134.27, 133.14, 132.55, 128.77, 128.10, 125.65, 124.48, 63.12; IR (neat): 3354, 3070, 2918, 1519, 1346, 736 cm<sup>-1</sup>. Consistent with published data.<sup>12</sup>

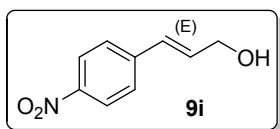

(*E*)-3-(4-Nitrophenyl)-2-propen-1-ol (**9i**) - (CAS: 35271-56-8). Compound **9i** was obtained in 74% (0.40 g) yield according to the general procedure as an orange solid; Compound **9i** was unstable and was used in the next reaction step immediately after isolated; <sup>1</sup>H NMR (300 MHz, CDCl<sub>3</sub>, ppm): δ 8.19 (d, *J* = 8.8 Hz, 2H), 7.52 (d, *J* = 8.8 Hz, 2H), 6.75 (d, *J* = 15.9 Hz, 1H), 6.54 (dt, *J* = 15.9, 5.0 Hz, 1H), 4.41 (d, *J* = 5.1 Hz, 2H). Consistent with published data.<sup>12</sup>

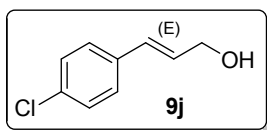

(*E*)-3-(4-Chlorophenyl)-2-propen-1-ol (**9j**) - (CAS: 24583-70-8). Compound **9j** was obtained in 89% (0.45 g) yield according to the general procedure as a white solid; mp: 45-46 °C; <sup>1</sup>H NMR (300 MHz, CDCl<sub>3</sub>, ppm): δ 7.40-7.18 (m, 4H), 6.57 (d, *J* = 15.9 Hz, 1H),

6.33 (dt,  $J = 15.9, 5.6$  Hz, 1H), 4.32 (d,  $J = 5.6$  Hz, 2H);  $^{13}\text{C}$  NMR (75 MHz,  $\text{CDCl}_3$ , ppm):  $\delta$  135.19, 133.30, 129.76, 129.18, 128.76, 127.66, 63.51; IR (KBr): 3323 (brs), 2924, 2870, 1490, 842, 798  $\text{cm}^{-1}$ . Consistent with published data.<sup>8</sup>

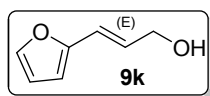

(*E*)-3-(2-Furanyl)-2-propen-1-ol (**9k**) - (CAS: 79380-02-2). Compound **9k** was obtained in 86% (0.32 g) yield according to the general procedure as a brown oil;  $^1\text{H}$  NMR (300 MHz,  $\text{CDCl}_3$ , ppm):  $\delta$  7.35 (brs, 1H), 6.45 (d,  $J = 15.9$  Hz, 1H), 6.39-6.35 (m, 1H), 6.35-6.22 (m, 2H), 4.29 (d,  $J = 5.5$  Hz, 2H);  $^{13}\text{C}$  NMR (75 MHz,  $\text{CDCl}_3$ , ppm):  $\delta$  152.38, 142.04, 127.19, 119.30, 111.28, 108.01, 63.27; IR (neat): 3342, 2877, 1560, 740  $\text{cm}^{-1}$ . Consistent with published data.<sup>13</sup>

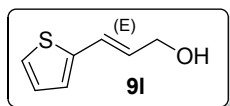

(*E*)-3-(2-Thienyl)-2-propen-1-ol (**9l**) - (CAS: 3216-44-2). Compound **9l** was obtained in 97% (0.41 g) yield according to the general procedure as an orange oil;  $^1\text{H}$  NMR (300 MHz,  $\text{CDCl}_3$ , ppm):  $\delta$  7.18-7.13 (m, 1H), 6.96 (d,  $J = 3.3$  Hz, 2H), 6.73 (d,  $J = 15.8$  Hz, 1H), 6.19 (dt,  $J = 15.8, 5.8$  Hz, 1H), 4.26 (d,  $J = 5.8$  Hz, 2H);  $^{13}\text{C}$  NMR (75 MHz,  $\text{CDCl}_3$ , ppm):  $\delta$  141.77, 128.11, 127.38, 125.83, 124.39, 124.32, 63.31; IR (neat): 3396, 2920, 2883, 1637, 700  $\text{cm}^{-1}$ . Consistent with published data.<sup>14</sup>

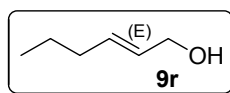

(*E*)-Hex-2-en-1-ol (**9r**) - (CAS: 928-95-0). Compound **9r** was obtained in 71% (0.21 g) yield according to the general procedure as a yellow oil;  $^1\text{H}$  NMR (300 MHz,  $\text{CDCl}_3$ , ppm):  $\delta$  5.76-5.57 (m, 2H), 4.08 (d,  $J = 5.1$  Hz, 2H), 2.09-1.97 (m, 2H), 1.48-1.34 (m, 2H), 0.91 (t,  $J = 7.3$  Hz, 3H);  $^{13}\text{C}$  NMR (75 MHz,  $\text{CDCl}_3$ , ppm):  $\delta$  133.28, 129.03, 63.79, 34.30, 22.29, 13.68. Consistent with published data.<sup>15</sup>

### 3.3. General Procedures for the Preparation of Allylic Carbamates 1a-s.

Carbamates (**1a-l, r,s**) were prepared according to the previously reported procedure.<sup>15</sup> To a stirred solution of allylic alcohol (**9a-l, r,s**) (5.0 mmol, 1.0 equiv.) in anhydrous DCM, *p*-toluenesulfonyl isocyanate (986 mg, 5.0 mmol, 1.0 equiv.) was added dropwise at 0 °C under an argon atmosphere. The reaction mixture was stirred for 2 h at room temperature and was quenched with water (125 mL). The mixture was extracted with DCM (3x50 mL), the combined organic layer was dried over  $\text{Na}_2\text{SO}_4$ , and evaporated under reduced pressure. The residue was purified by flash column chromatography (90:9:1 DCM/MeOH/ $\text{NH}_4\text{OH}$ ) to give the desired allylic carbamate (**1a-l**).

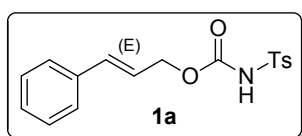

Carbamic acid, [(4-methylphenyl)sulfonyl]-, (*2E*)-3-phenyl-2-propenyl ester (**1a**) - (CAS: 855422-02-5). Compound **1a** was obtained in 95% (1.58 g) yield according to the general procedure as a white solid; mp: 103-105 °C;  $^1\text{H}$  NMR (300 MHz,  $\text{CDCl}_3$ , ppm):  $\delta$  7.93 (d,  $J = 7.5$  Hz, 2H), 7.33-7.32 (m, 7H), 6.58 (d,  $J = 16.0$  Hz, 1H), 6.14 (dt,  $J = 16.0, 6.6$  Hz, 1H), 4.72 (d,  $J = 6.6$  Hz, 2H), 2.41 (s, 3H);  $^{13}\text{C}$  NMR (75 MHz,  $\text{CDCl}_3$ , ppm):  $\delta$  150.19, 145.17, 135.75, 135.47, 135.42, 129.64, 128.66, 128.46, 128.40, 126.70, 121.58, 67.38, 21.67; IR (KBr): 3242, 3026, 1755, 1599, 1435, 1163  $\text{cm}^{-1}$ . Partially consistent with published data by Cossío, Carreaux and coworkers.<sup>16</sup> Our NMR results do not show evidence for the presence of rotamers.

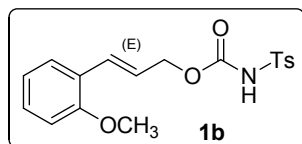

Carbamic acid, *N*-[(4-methylphenyl)sulfonyl]-, (*2E*)-3-(2-methoxyphenyl)-2-propen-1-yl ester (**1b**) - (CAS: 1863094-76-1). Compound **1b** was obtained in 88% (1.59 g) yield according to the general procedure as a white solid; mp: 99-98 °C;  $^1\text{H}$  NMR (300 MHz,  $\text{CDCl}_3$ , ppm):  $\delta$  7.86 (d,  $J = 8.3$  Hz, 2H), 7.32-7.14 (m, 4H), 6.90-6.77 (m, 3H), 6.10 (dt,  $J = 16.0, 6.6$  Hz, 1H), 4.65 (d,  $J = 6.6$  Hz, 2H), 3.76 (s, 3H), 2.34 (s, 3H);  $^{13}\text{C}$  NMR (75 MHz,  $\text{CDCl}_3$ , ppm):  $\delta$  156.94, 150.34, 145.06, 135.48, 130.59, 129.60, 129.48, 128.45, 127.26, 124.77, 122.15, 120.66, 110.89, 67.99, 55.43, 21.65; IR

(KBr): 3234, 1745, 1598, 1436, 1222, 1153, 1059, 750  $\text{cm}^{-1}$ . Partially consistent with published data by Cossío, Carreaux and coworkers.<sup>16</sup> Our NMR results do not show evidence for the presence of rotamers.

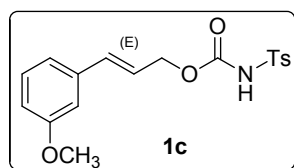

Carbamic acid, *N*-[(4-methylphenyl)sulfonyl]-, (2*E*)-3-(3-methoxyphenyl)-2-propen-1-yl ester (**1c**) - (CAS: 1863094-80-7). Compound **1c** was obtained in 88% (1.59 g) yield according to the general procedure as a white solid; mp: 99-98 °C; <sup>1</sup>H NMR (300 MHz, CDCl<sub>3</sub>, ppm):  $\delta$  7.86 (d, *J* = 8.3 Hz, 2H), 7.28 (d, *J* = 8.3 Hz, 2H), 7.21 (d, *J* = 7.9 Hz, 1H), 6.96-6.77 (m, 3H), 6.51 (d, *J* = 15.9 Hz, 1H), 6.16 (dt, *J* = 15.9, 6.2 Hz, 1H), 4.65 (d, *J* = 6.2 Hz, 2H), 3.81 (s, 3H), 2.39 (s, 3H); <sup>13</sup>C NMR (75 MHz, CDCl<sub>3</sub>, ppm):  $\delta$  159.74, 152.81, 144.22, 137.39, 136.57, 134.44, 129.54, 129.47, 128.00, 122.66, 119.29, 113.78, 111.95, 66.92, 55.21, 21.51; IR (KBr): 3232, 1745, 1577, 1438, 1265, 1151, 1085, 773, 663  $\text{cm}^{-1}$ .

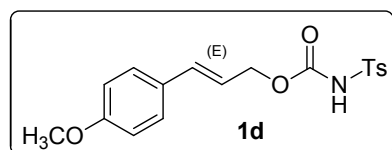

Carbamic acid, *N*-[(4-methylphenyl)sulfonyl]-, (2*E*)-3-(4-methoxyphenyl)-2-propen-1-yl ester (**1d**) - (CAS: 1863094-90-9). Compound **1d** was obtained in 90% (1.63 g) yield according to the general procedure as a yellow oil; <sup>1</sup>H NMR (300 MHz, CD<sub>3</sub>OD, ppm):  $\delta$  7.86 (d, *J* = 8.2 Hz, 2H), 7.29 (t, *J* = 8.7 Hz, 4H), 6.85 (d, *J* = 8.7 Hz, 2H), 6.49 (d, *J* = 15.9 Hz, 1H), 6.06 (dt, *J* = 15.9, 6.2 Hz, 1H), 4.59 (d, *J* = 6.2 Hz, 2H), 3.77 (s, 3H), 2.37 (s, 3H); <sup>13</sup>C NMR (75 MHz, CD<sub>3</sub>OD, ppm):  $\delta$  161.01, 156.53, 144.55, 139.85, 134.53, 130.39, 130.18, 128.82, 128.62, 122.04, 114.95, 67.28, 55.69, 21.46; IR (neat): 3184, 1624, 1512, 1292, 1238, 1138, 1062, 813  $\text{cm}^{-1}$ . Partially consistent with published data by Cossío, Carreaux and coworkers.<sup>16</sup> Our NMR results do not show evidence for the presence of rotamers.

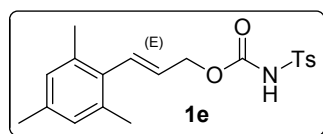

Carbamic acid, *N*-[(4-methylphenyl)sulfonyl]-, (2*E*)-3-(2,4,6-trimethylphenyl)-2-propen-1-yl ester (**1e**) - (CAS: 1863094-98-7). Compound **1e** was obtained in a quantitative (1.87 g) yield according to the general procedure as a light yellow oil; <sup>1</sup>H NMR (300 MHz, CDCl<sub>3</sub>, ppm):  $\delta$  7.78 (d, *J* = 8.2 Hz, 2H), 6.97 (d, *J* = 8.2 Hz, 2H), 6.74 (s, 2H), 6.34 (d, *J* = 16.2 Hz, 1H), 5.53 (dt, *J* = 16.2, 6.2 Hz, 1H), 4.50 (d, *J* = 6.2 Hz, 2H), 2.21 (s, 3H), 2.19 (s, 3H), 2.05 (s, 6H); <sup>13</sup>C NMR (75 MHz, CDCl<sub>3</sub>, ppm):  $\delta$  153.49, 143.84, 136.73, 136.29, 135.67, 132.61, 132.40, 129.26, 128.47, 127.75, 127.32, 67.19, 21.31, 20.82, 20.60; IR (neat): 3257, 1720, 1656, 1448, 1384, 975  $\text{cm}^{-1}$ .

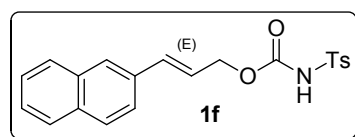

Carbamic acid, *N*-[(4-methylphenyl)sulfonyl]-, (2*E*)-3-(2-naphthalenyl)-2-propen-1-yl ester (**1f**) - (CAS: 1863095-02-6). Compound **1f** was obtained in a quantitative (1.91 g) yield according to the general procedure as a white solid; mp: 124-125 °C; <sup>1</sup>H NMR (300 MHz, DMSO-*d*<sub>6</sub>, ppm):  $\delta$  7.85 (d, *J* = 8.2 Hz, 2H), 7.81-7.71 (m, 3H), 7.64 (s, 1H), 7.53-7.42 (m, 3H), 7.22 (d, *J* = 8.1 Hz, 2H), 6.66 (d, *J* = 15.9 Hz, 1H), 6.28 (dt, *J* = 15.9, 6.1 Hz, 1H), 4.68 (d, *J* = 6.1 Hz, 2H), 2.33 (s, 3H); <sup>13</sup>C NMR (75 MHz, DMSO-*d*<sub>6</sub>, ppm):  $\delta$  157.57, 142.71, 139.79, 134.08, 133.23, 132.53, 130.84, 128.27, 128.18, 127.89, 127.59, 126.84 (2C), 126.42, 125.99, 123.56, 79.22, 63.87, 20.92; IR (KBr): 3184, 3055, 1620, 1450, 1138  $\text{cm}^{-1}$ .

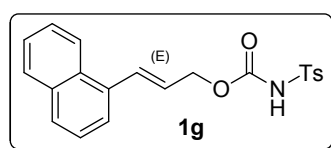

Carbamic acid, *N*-[(4-methylphenyl)sulfonyl]-, (2*E*)-3-(1-naphthalenyl)-2-propen-1-yl ester (**1g**) - (CAS: 1863095-00-4). Compound **1g** was obtained in 98% (1.87 g) yield according to the general procedure as a brown oil. <sup>1</sup>H NMR (300 MHz, CD<sub>3</sub>OD, ppm):  $\delta$  8.06-7.98 (m, 1H), 7.83 (d, *J* = 8.3 Hz, 2H), 7.79 (m, 1H), 7.73 (d, *J* = 8.1 Hz, 1H), 7.51-7.41 (m, 4H), 7.37 (d, *J* = 7.7 Hz, 1H), 7.28 (d, *J* = 15.7 Hz, 1H), 7.18 (d, *J* = 8.1 Hz, 1H), 6.18 (dt, *J* = 15.6, 5.7 Hz, 1H), 4.67 (d, *J* = 5.7 Hz, 2H), 2.23 (s, 3H); <sup>13</sup>C NMR (75 MHz, CDCl<sub>3</sub>, ppm):  $\delta$  159.94, 142.22, 139.04, 133.88, 133.40,



130.93, 130.16, 129.09, 128.27, 127.94, 127.09, 126.82, 125.98, 125.62, 125.45, 123.85, 123.65, 66.36, 21.09; IR (neat): 3207, 3049, 2951, 1745, 1614, 1454, 1273  $\text{cm}^{-1}$ .

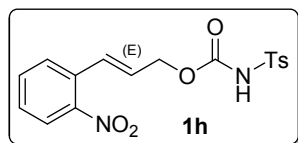

Carbamic acid, *N*-[(4-methylphenyl)sulfonyl]-, (2*E*)-3-(2-nitrophenyl)-2-propen-1-yl ester (**1h**). Compound **1h** was obtained in 40% (0.75 g) yield according to the general procedure as a brown oil;  $^1\text{H}$  NMR (300 MHz,  $\text{CDCl}_3$ , ppm):  $\delta$  7.94-7.90 (m, 3H), 7.58-7.48 (m, 2H), 7.43-7.38 (m, 1H), 7.30 (d,  $J = 8.2$  Hz, 2H), 7.03 (d,  $J = 15.8$  Hz, 1H), 6.13 (dt,  $J = 15.8, 6.0$  Hz, 1H), 4.74 (d,  $J = 6.0$  Hz, 2H), 2.38 (s, 3H);  $^{13}\text{C}$  NMR (75 MHz,  $\text{CDCl}_3$ , ppm):  $\delta$  150.65, 147.66, 145.08, 135.48, 133.35, 131.73, 129.63, 129.56, 128.90, 128.76, 128.32, 127.28, 124.58, 66.42, 21.61; IR (neat): 3269, 2947, 1743, 1523, 1465, 1414, 740  $\text{cm}^{-1}$ ; HRMS (ESI):  $m/z$   $[\text{M}+\text{NH}_4]^+$  calculated for  $\text{C}_{17}\text{H}_{20}\text{N}_3\text{O}_6\text{S}$ : 394.1067; found: 394.1055.

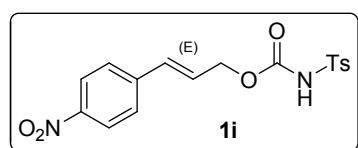

Carbamic acid, *N*-[(4-methylphenyl)sulfonyl]-, (2*E*)-3-(4-nitrophenyl)-2-propen-1-yl ester (**1i**) – (CAS 2254190-75-3). Compound **1i** was obtained in 66% (1.24 g) yield according to the general procedure as an orange solid; mp: 120-122  $^\circ\text{C}$ ;  $^1\text{H}$  NMR (300 MHz,  $\text{CD}_3\text{OD}-d_4$ , ppm):  $\delta$  8.14 (d,  $J = 8.8$  Hz, 2H), 7.81 (d,  $J = 8.0$  Hz, 2H), 7.54 (d,  $J = 8.8$  Hz, 2H), 7.25 (d,  $J = 8.0$  Hz, 2H), 6.62 (d,  $J = 16.0$  Hz, 1H), 6.48 (dt,  $J = 16.0, 6.0$  Hz, 1H), 4.61 (d,  $J = 6.0$  Hz, 2H), 2.35 (s, 3H);  $^{13}\text{C}$  NMR (75 MHz,  $\text{DMSO}-d_6$ , ppm):  $\delta$  156.13, 146.42, 143.25, 140.66, 131.28, 128.67, 128.54, 127.29, 126.98, 123.98, 79.22, 63.76, 20.95; IR (KBr): 3471, 2960, 1737, 1597, 1450, 740  $\text{cm}^{-1}$ . Partially consistent with published data by Cossío, Carreaux and coworkers.<sup>16</sup> Our NMR results do not show evidence for the presence of rotamers.

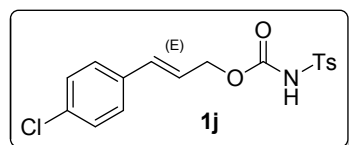

Carbamic acid, *N*-[(4-methylphenyl)sulfonyl]-, (2*E*)-3-(4-chlorophenyl)-2-propen-1-yl ester (**1j**) – (CAS: 1863094-84-1). Compound **1j** was obtained in 77% (1.41 g) yield according to the general procedure as a white solid; mp: 138-140  $^\circ\text{C}$ ;  $^1\text{H}$  NMR (300 MHz,  $\text{DMSO}-d_6$ , ppm):  $\delta$  7.50 (d,  $J = 8.1$  Hz, 2H), 7.31-7.17 (m, 2H), 7.06 (bd,  $J = 8.1$  Hz, 2H), 6.33 (d,  $J = 16.0$  Hz, 1H), 6.12 (dt,  $J = 16.0, 5.5$  Hz, 1H), 4.26 (d,  $J = 5.5$  Hz, 2H), 2.16 (s, 3H);  $^{13}\text{C}$  NMR (75 MHz,  $\text{DMSO}-d_6$ , ppm):  $\delta$  156.79, 142.01, 140.25, 135.39, 131.96, 129.68, 128.63, 128.39, 128.01, 126.94, 126.89, 63.85, 20.92; IR (KBr): 3182, 3062, 2976, 1625, 1492, 1300, 1138, 968, 813  $\text{cm}^{-1}$ . Partially consistent with published data by Cossío, Carreaux and coworkers.<sup>16</sup> Our NMR results do not show evidence for the presence of rotamers.

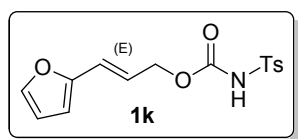

Carbamic acid, *N*-[(4-methylphenyl)sulfonyl]-, (2*E*)-3-(2-furanyl)-2-propen-1-yl ester (**1k**). The compound **1k** is unstable and should be used in the next reaction step immediately after isolated according to the general procedure as a yellow oil.  $^1\text{H}$  NMR (300 MHz,  $\text{CDCl}_3$ , ppm):  $\delta$  7.93 (d,  $J = 8.0$  Hz, 2H), 7.35-7.30 (m, 3H), 6.40-6.35 (m, 2H), 6.25 (d,  $J = 3.1$  Hz, 1H), 6.06 (dt,  $J = 15.6, 6.1$  Hz, 1H), 4.68 (d,  $J = 6.1$  Hz, 2H), 2.42 (s, 3H).

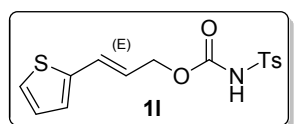

Carbamic acid, *N*-[(4-methylphenyl)sulfonyl]-, (2*E*)-3-(2-thiophenyl)-2-propen-1-yl ester (**1l**). The compound **1l** is unstable and should be used in the next reaction step immediately after isolated according to the general procedure as a yellow oil.  $^1\text{H}$  NMR (300 MHz,  $\text{CDCl}_3$ , ppm):  $\delta$  7.92 (d,  $J = 8.5$  Hz, 2H), 7.32 (d,  $J = 8.5$  Hz, 2H), 7.21-7.19 (m, 1H), 6.96 (d,  $J = 3.3$  Hz, 2H), 6.70 (d,  $J = 15.9$  Hz, 1H), 5.95 (dt,  $J = 15.9, 6.6$  Hz, 1H), 4.68 (d,  $J = 6.6$  Hz, 2H), 2.43 (s, 3H).

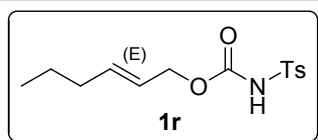

(*E*)-hex-2-en-1-yl tosylcarbamate (**1r**) - (CAS: 1437784-91-2). Compound **1r** was obtained in 89% (1.32 g) yield according to the general procedure as a yellow viscous oil;  $^1\text{H}$  NMR (300 MHz,  $\text{CDCl}_3$ , ppm):  $\delta$  7.81 (d,  $J = 8.0$  Hz, 2H), 7.15 (d,  $J = 8.0$  Hz, 2H), 5.63-5.51 (m, 1H), 5.44-5.30 (m, 1H), 4.34 (d,  $J = 6.3$  Hz, 2H), 1.90 (q,  $J = 7.0$  Hz, 2H), 1.39-1.21 (m, 2H), 0.83 (t,  $J = 7.3$  Hz, 3H);  $^{13}\text{C}$  NMR (75 MHz,  $\text{CDCl}_3$ , ppm):  $\delta$  155.59, 142.95, 138.11, 136.15, 129.21, 127.56, 123.87, 66.73, 34.22, 21.98, 21.48, 13.63. Consistent with published data.<sup>17</sup>

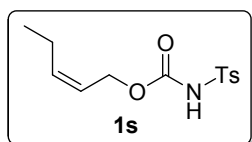

(*Z*)-pent-2-en-1-yl tosylcarbamate (**1s**) - (CAS: 1437784-84-3). Compound **1s** was obtained in a quantitative (1.42 g) yield according to the general procedure as a colorless oil;  $^1\text{H}$  NMR (300 MHz,  $\text{CDCl}_3$ , ppm):  $\delta$  7.92 (d,  $J = 8.3$  Hz, 2H), 7.84 (bs, NH), 7.34 (d,  $J = 8.3$  Hz, 2H), 5.70-5.58 (m, 1H), 5.45-5.33 (m, 1H), 4.62 (d,  $J = 7.0$  Hz, 2H), 2.44 (s, 3H), 2.05 (p,  $J = 7.5$  Hz, 2H), 0.95 (t,  $J = 7.5$  Hz, 3H). Consistent with published data.<sup>18</sup>

### Synthesis cinnamyl diethoxyphosphorylcarbamate (**1m**).

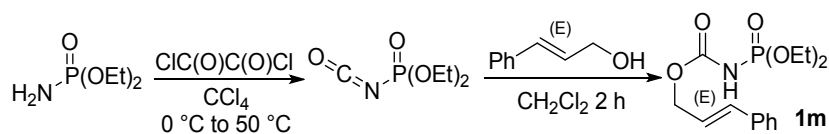

Carbamate **1m** was prepared according to the previously reported procedure.<sup>15,19</sup> A solution of diethyl phosphoramidate (765 mg, 5.0 mmol, 1.0 equiv) in carbon tetrachloride (7.5 mL) was slowly added dropwise to a cooled solution (0 °C) of oxalyl chloride (472  $\mu\text{L}$ , 5.5 mmol, 1.1 equiv) in carbon tetrachloride (7.5 mL). After the addition was completed the temperature of the mixture is slowly raised to 50 °C and maintained for 1 h. The mixture is then cooled to room temperature and evaporated under reduced pressure. The residual liquid was distilled under reduced pressure using a bulb-to-bulb apparatus to afford the corresponding isocyanate, that should be carefully protected from moisture. Then a solution of the obtained isocyanate in anhydrous  $\text{CH}_2\text{Cl}_2$  (10.0 mL) was added dropwise to a solution of cinnamic alcohol (738 mg, 5.5 mmol, 1.1 equiv) in anhydrous  $\text{CH}_2\text{Cl}_2$  (10.0 mL) at 0 °C under nitrogen atmosphere. The reaction mixture was stirred for 2 h and solvent was evaporated under reduced pressure. The residue was purified by flash column chromatography (DCM) to give the desired carbamate **1m** in 49% (after 2 steps reactions, 0.77 g) yield as a colorless solid; mp: 59-62 °C;  $^1\text{H}$  NMR (300 MHz,  $\text{CDCl}_3$ , ppm):  $\delta$  7.39-7.24 (m, 5H), 6.68 (d,  $J = 15.8$  Hz, 1H), 6.27 (dt,  $J = 15.8, 6.4$  Hz, 1H), 4.77 (d,  $J = 6.4$  Hz, 2H), 4.24-4.17 (m, 4H), 1.37-1.32 (m, 6H);  $^{13}\text{C}$  NMR (75 MHz,  $\text{CDCl}_3$ , ppm):  $\delta$  153.40, 136.12, 134.49, 128.63, 128.15, 126.61, 122.72, 66.52, 64.11 (d,  $J_{\text{CP}} = 5.6$  Hz), 16.08 (d,  $J_{\text{CP}} = 6.9$  Hz); IR (KBr): 3111, 3026, 2983, 1732, 1444, 1029  $\text{cm}^{-1}$ ; HRMS (ESI):  $m/z$   $[\text{M}+\text{H}]^+$  calculated for  $\text{C}_{14}\text{H}_{20}\text{NO}_5\text{P}$ : 314.1152; found: 314.1147.

### Synthesis of cinnamyl phenylcarbamate (**1n**) - (CAS: 28315-20-0).

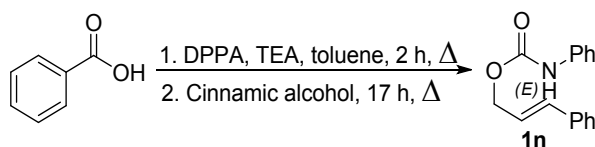

Carbamate **1n** was prepared according to the previously reported procedure.<sup>20</sup> To a stirred solution of benzoic acid (611 mg, 5.0 mmol, 1.0 equiv) in anhydrous toluene (4.0 mL), diphenylphosphoryl azide (DPPA) (1,22 g, 5.0 mmol, 1.0 equiv), triethylamine (0.7 mL, 5.0 mmol, 1.0 equiv) were added respectively. The mixture was stirred for 2 h

under reflux after no more gas was formed. The reaction was allowed to cool and a solution of cinnamic alcohol (738 mg, 5.0 mmol, 1.0 equiv) in toluene (4.0 mL) was added slowly. The reaction was stirred overnight under reflux. Solvent was removed under reduced pressure. The residue was purified by flash column chromatography (DCM) to give the carbamate **1n** in 60% (0.76 g) yield as a white solid; mp: 86-88 °C; <sup>1</sup>H NMR (300 MHz, CDCl<sub>3</sub>, ppm): δ 7.40-7.37 (m, 4H), 7.34-7.24 (m, 4H), 7.08-7.03 (m, 1H), 6.72 (brs, 1H), 6.68 (d, *J* = 16.0 Hz, 1H), 6.32 (dt, *J* = 16.0, 6.4 Hz, 1H), 4.82 (d, *J* = 6.4 Hz, 2H); <sup>13</sup>C NMR (75 MHz, CDCl<sub>3</sub>, ppm): δ 153.33, 137.79, 136.18, 134.23, 129.07, 128.62, 128.10, 126.64, 123.53, 123.34, 118.77, 65.77; IR (KBr): 3321, 3043, 2974, 1697, 1442, 1236 cm<sup>-1</sup>. Consistent with published data.<sup>21</sup>

#### Synthesis of cinnamyl (4-methoxyphenyl)carbamate (**1o**) – (CAS: 1580503-51-0).

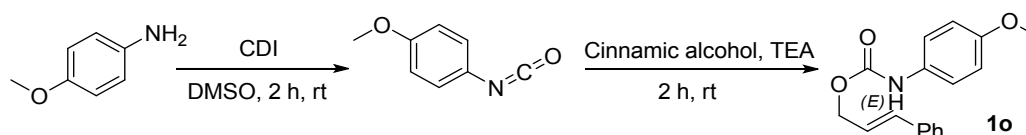

Carbamate **1o** was prepared according to the previously reported procedure.<sup>22</sup> A solution of *p*-anidisine (246 mg, 2.0 mmol, 1.0 equiv) in DMSO (5.0 mL) was treated with 1,1'-carbonyldiimidazole - CDI (389 mg, 2.4 mmol, 1.2 equiv). The mixture was stirred at room temperature for 2 h. Cinnamic alcohol (295 mg, 2.2 mmol, 1.1 equiv) and triethylamine (0.3 mL, 2.2 mmol, 1.1 equiv) were added and the reaction was allowed to stir at room temperature for more 2 h. Ethyl acetate (10 mL) was added, and the solution was washed with water (4 x 10 mL) and then dried over Na<sub>2</sub>SO<sub>4</sub>. The combined organic extract was filtered and the concentrated under reduced pressure. The residue was purified by flash column chromatography (DCM) to give the carbamate **1o** in 47% (0.66 g) yield as a white solid; mp: 113-114 °C; <sup>1</sup>H NMR (300 MHz, CDCl<sub>3</sub>, ppm): δ 7.42-7.21 (m, 7H), 6.84 (d, *J* = 9.0 Hz, 2H), 6.67 (m, 2H), 6.31 (dt, *J* = 15.9, 6.3 Hz, 1H), 4.80 (d, *J* = 6.3 Hz, 2H), 3.76 (s, 3H); <sup>13</sup>C NMR (75 MHz, CDCl<sub>3</sub>, ppm): δ 156.15, 153.90, 136.33, 134.18, 130.97, 128.72, 128.17, 126.74, 123.62, 120.90 (brs), 114.36, 65.80, 55.59; IR (KBr): 3331, 2924, 1693, 1529, 1238, 1058, 744, 692 cm<sup>-1</sup>. Consistent with published data.<sup>22</sup>

#### Synthesis of cinnamyl (4-methyl-3-nitrophenyl)carbamate (**1p**).

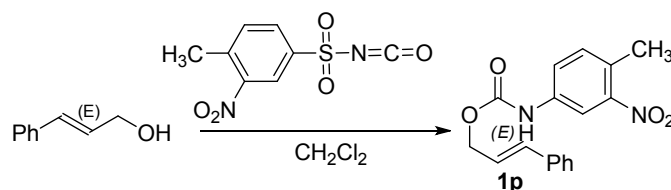

To a stirred solution of cinnamic alcohol (443 mg, 3.3 mmol, 1.1 equiv) in anhydrous DCM, 4-methyl-3-nitrophenyl isocyanate (727 mg, 3.0 mmol, 1.0 equiv) was added dropwise at 0 °C under argon atmosphere. The reaction mixture was stirred for 2 h and solvent was evaporated under reduced pressure. The residue was purified by flash column chromatography (DCM) to give the desired carbamate **1p** in 76% (0.71 g) yield as a yellow solid; mp: 104.5-106.2 °C; <sup>1</sup>H NMR (300 MHz, CDCl<sub>3</sub>, ppm): δ 8.05 (d, *J* = 1.9 Hz, 1H), 7.56 (d, *J* = 7.8 Hz, 1H), 7.40 (d, *J* = 7.8 Hz, 2H), 7.34 (d, *J* = 6.8 Hz, 1H), 7.32-7.22 (m, 3H), 6.86 (s, 1H), 6.69 (d, *J* = 15.9 Hz, 1H), 6.32 (dt, *J* = 15.9, 6.5 Hz, 1H), 4.82 (d, *J* = 6.5, 2H), 2.54 (s, 3H); <sup>13</sup>C NMR (75 MHz, CDCl<sub>3</sub>, ppm): δ 153.23, 149.36, 136.91, 136.15, 134.86, 133.40, 128.79, 128.38, 128.33, 126.80, 123.15, 122.95 (brs), 114.69, 66.37, 19.98; IR (KBr): 3356, 3016, 2926, 1735, 1344, 1319, 690 cm<sup>-1</sup>; HRMS (ESI): *m/z* [M+NH<sub>4</sub>]<sup>+</sup> calculated for C<sub>17</sub>H<sub>20</sub>N<sub>3</sub>O<sub>4</sub>: 330.1448; found: 330.1442.

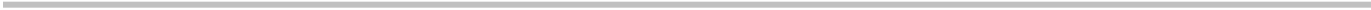

### Synthesis of dicinnamyl (methylenebis(4,1-phenylene))dicarbamate (**1q**).

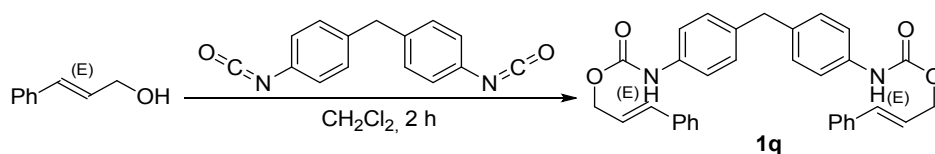

To a stirred solution of cinnamic alcohol (6.6 mmol, 2.2 equiv) in anhydrous DCM, 4,4'-methylenebis(phenyl isocyanate) (3.0 mmol, 1.0 equiv) was added dropwise at 0 °C under nitrogen atmosphere. The reaction mixture was stirred for 2 h and solvent was evaporated under reduced pressure. The residue was purified by flash column chromatography (DCM) to give the desired carbamate **1q** in 60% (0.93 g) yield as a white solid; mp: 156-158 °C;  $^1\text{H}$  NMR (300 MHz, Acetone- $d_6$ , ppm):  $\delta$  8.65 (brs, 2H), 7.52-7.16 (m, 18 H), 6.75 (d,  $J$  = 15.9 Hz, 2H), 6.41 (dt,  $J$  = 15.9, 6.1 Hz, 2H), 4.79 (d,  $J$  = 6.1 Hz, 4H), 3.90 (s, 2H);  $^{13}\text{C}$  NMR (75 MHz, Acetone- $d_6$ , ppm):  $\delta$  154.29, 138.21, 137.47, 136.90, 134.01, 129.95, 129.51, 128.76, 127.38, 125.17, 119.36, 65.61, 41.09; IR (KBr): 3307, 3026, 2958, 1703, 1529, 1415, 867, 854  $\text{cm}^{-1}$ ; HRMS (ESI):  $m/z$   $[\text{M}+\text{NH}_4]^+$  calculated for  $\text{C}_{33}\text{H}_{34}\text{N}_3\text{O}_4$ : 536.2544; found: 536.2530.

### 3.4. General Procedures for the Synthesis and Characterization Data of Oxazolidinones **2a-s**.

**Synthesis of 2a-l.** A 10 mL vial was charged with AgOAc (33 mg, 0.2 mmol, 1.0 equiv),  $\text{Bu}_4\text{Cl}$  (55 mg, 0.2 mmol, 1.0 equiv) and  $\text{CH}_3\text{CN}$  (2.0 mL), the mixture was allowed to stir for 1 h at room temperature to obtain *in situ*  $\text{Bu}_4\text{NOAc}$ . Next were added  $\text{CuCl}_2$  (134 mg, 1.0 mmol, 5.0 equiv),  $\text{PdCl}_2(\text{CH}_3\text{CN})_2$  (4.6 mg, 0.02 mmol, 10 mol %), LiCl (42 mg, 1.0 mmol, 5.0 equiv) and the corresponding allylic carbamate **1a-l** (0.2 mmol, 1.0 equiv), respectively. The reaction was heated to 60 °C (50 °C to allylic carbamate **1e**) for 2.5 h. The solvent was removed under reduced vacuum. Flash chromatography column (1:1 EtOAc/Hexane) gave the desired product.

**Synthesis of 2m.** A 10 mL vial was charged with AgOAc (66 mg, 0.4 mmol, 4.0 equiv),  $\text{Bu}_4\text{Cl}$  (110 mg, 0.4 mmol, 2.0 equiv) and  $\text{CH}_3\text{CN}$  (2.0 mL), the mixture was allowed to stir for 1 h at room temperature to obtain *in situ*  $\text{Bu}_4\text{NOAc}$ . Next were added  $\text{CuCl}_2$  (134 mg, 1.0 mmol, 5.0 equiv),  $\text{PdCl}_2(\text{CH}_3\text{CN})_2$  (4.6 mg, 0.02 mmol, 10 mol %), LiCl (42 mg, 1.0 mmol, 5.0 equiv) and the corresponding allylic carbamate **1m** (62 mg, 0.2 mmol, 1.0 equiv), respectively. The reaction was heated to 60 °C for 24 h. The solvent was removed under vacuum. Flash chromatography column (1:1 EtOAc/Hexane) gave the desired product.

**Synthesis of 2n.** A 10 mL vial was charged with AgOAc (66 mg, 0.4 mmol, 4.0 equiv),  $\text{Bu}_4\text{Cl}$  (110 mg, 0.4 mmol, 2.0 equiv) and  $\text{CH}_3\text{CN}$  (2.0 mL), the mixture was allowed to stir for 1 h at room temperature to obtain *in situ*  $\text{Bu}_4\text{NOAc}$ . Next were added  $\text{CuCl}_2$  (134 mg, 1.0 mmol, 5.0 equiv),  $\text{PdCl}_2(\text{CH}_3\text{CN})_2$  (4.6 mg, 0.02 mmol, 10 mol %), LiCl (42 mg, 1.0 mmol, 5.0 equiv) and the corresponding allylic carbamate **1n** (51 mg, 0.2 mmol, 1.0 equiv), respectively. The reaction was heated to 80 °C for 24 h. The solvent was removed under reduced vacuum. Flash chromatography column (1:1 EtOAc/Hexane) gave the desired product.

**Synthesis of 2o.** A 10 mL vial was charged with AgOAc (33 mg, 0.2 mmol, 1.0 equiv),  $\text{Bu}_4\text{Cl}$  (55 mg, 0.2 mmol, 1.0 equiv) and  $\text{CH}_3\text{CN}$  (2.0 mL), the mixture was allowed to stir for 1 h at room temperature to obtain *in situ*  $\text{Bu}_4\text{NOAc}$ . Next were added  $\text{CuCl}_2$  (134 mg, 1.0 mmol, 5.0 equiv),  $\text{PdCl}_2(\text{CH}_3\text{CN})_2$  (4.6 mg, 0.02 mmol, 10 mol %), LiCl (42 mg, 1.0 mmol, 5.0 equiv) and the corresponding allylic carbamate **1o** (57 mg, 0.2 mmol, 1.0 equiv), respectively. The reaction was heated to 60 °C for 5 h. The solvent was removed under reduced vacuum. Flash chromatography column (1:1 EtOAc/Hexane) gave the desired product.

**Synthesis of 2p.** A 10 mL vial was charged with AgOAc (33 mg, 0.2 mmol, 1.0 equiv), Bu<sub>4</sub>Cl (55 mg, 0.2 mmol, 1.0 equiv) and CH<sub>3</sub>CN:THF (1.0:1.0 mL), the mixture was allowed to stir for 1 h at room temperature to obtain *in situ* Bu<sub>4</sub>NOAc. Next were added CuCl<sub>2</sub> (134 mg, 1.0 mmol, 5.0 equiv), PdCl<sub>2</sub>(CH<sub>3</sub>CN)<sub>2</sub> (4.6 mg, 0.02 mmol, 10 mol %), LiCl (42 mg, 1.0 mmol, 5.0 equiv) and the corresponding allylic carbamate **1p** (62 mg, 0.2 mmol, 1.0 equiv), respectively. The reaction was heated to 80 °C for 24 h. The solvent was removed under reduced vacuum. Flash chromatography column (1:1 EtOAc/Hexane) gave the desired product.

**Synthesis of 2q.** A 10 mL vial was charged with AgOAc (66 mg, 0.4 mmol, 4.0 equiv), Bu<sub>4</sub>Cl (110 mg, 0.4 mmol, 2.0 equiv) and CH<sub>3</sub>CN:THF (1.0:1.0 mL), the mixture was allowed to stir for 1 h at room temperature to obtain *in situ* Bu<sub>4</sub>NOAc. Next were added CuCl<sub>2</sub> (134 mg, 1.0 mmol, 5.0 equiv), PdCl<sub>2</sub>(CH<sub>3</sub>CN)<sub>2</sub> (4.6 mg, 0.02 mmol, 10 mol %), LiCl (42 mg, 1.0 mmol, 5.0 equiv) and the corresponding allylic carbamate **1q** (104 mg, 0.2 mmol, 1.0 equiv), respectively. The reaction was heated to 60 °C for 24 h. The solvent was removed under reduced vacuum. Flash chromatography column (1:1 EtOAc/Hexane) gave the desired product.

**Tentative synthesis of 2r.** A AgOAc (33 mg, 0.2 mmol, 1.0 equiv), Bu<sub>4</sub>Cl (55 mg, 0.2 mmol, 1.0 equiv) and THF (2.0 mL), the mixture was allowed to stir for 1 h at room temperature, then the mixture was centrifugated to obtain Bu<sub>4</sub>NOAc. Next were added carbamate CuCl<sub>2</sub> (134 mg, 1.0 mmol, 5.0 equiv), PdCl<sub>2</sub>(CH<sub>3</sub>CN)<sub>2</sub> (4.6 mg, 0.02 mmol, 10 mol %), LiCl (42 mg, 1.0 mmol, 5.0 equiv) and **1r** (59 mg, 0.2 mmol, 1.0 equiv), respectively. The reaction was stirred at room temperature overnight. The solvent was removed under reduced vacuum. Flash chromatography column (3:7 EtOAc/Hexane) gave the [3,3]-sigmatropic rearrangement product **3r**.

**Synthesis of 2s.** A 10 mL vial was charged with carbamate **1s** (57 mg, 0.2 mmol, 1.0 equiv), CuCl<sub>2</sub> (134 mg, 1.0 mmol, 5.0 equiv), PdCl<sub>2</sub>(CH<sub>3</sub>CN)<sub>2</sub> (4.6 mg, 0.02 mmol, 10 mol %), LiCl (42 mg, 1.0 mmol, 5.0 equiv) and THF (2.0 mL) respectively. The reaction was stirred at room temperature for 24 h. The reaction was heated to 60 °C for 24 h. The solvent was removed under reduced vacuum. Flash chromatography column (3:7 EtOAc/Hexane) gave the desired product.

**Gram-Scale Preparation of 2a.** A 50 mL round-bottom flask was charged with AgOAc (500 mg, 3.0 mmol, 1.0 equiv), Bu<sub>4</sub>Cl (834 mg, 3 mmol, 1.0 equiv) and CH<sub>3</sub>CN (30 mL), the mixture was allowed to stir for 1 h at room temperature to obtain *in situ* Bu<sub>4</sub>NOAc. Next were added CuCl<sub>2</sub> (2.0 g, 15 mmol, 5.0 equiv), PdCl<sub>2</sub>(CH<sub>3</sub>CN)<sub>2</sub> (69 mg, 0.3 mmol for the reaction using 10 mol % and 34.5 mg, 0.15 mmol for the reaction using 5 mol %), LiCl (640 mg, 15 mmol, 5.0 equiv) and the corresponding allylic carbamate **1a** (1.0 g, 3.0 mmol, 1.0 equiv), respectively. The reaction was heated to 60 °C for 2.5 h (24 h for the reaction using PdCl<sub>2</sub>(CH<sub>3</sub>CN)<sub>2</sub> at 5 mol %). The solvent was removed under reduced vacuum. Flash chromatography column (1:1 EtOAc/Hexane) gave the desired product in 65% and 75% yield in reactions using 10 mol % and 5 mol % of the palladium salt, respectively.

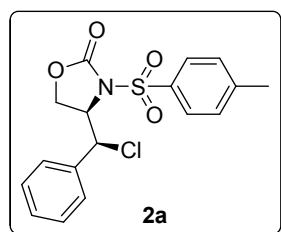

4-(Chloro(phenyl)methyl)-3-tosyloxazolidin-2-one (**2a**). Compound **2a** was obtained in 65% (47 mg) yield according to the general procedure as a white solid; mp: 86-89 °C; dr = 20:1 [determined by the ratio of area at  $\delta$  5.80 (d,  $J$  = 2.4 Hz, major isomer) and  $\delta$  5.54 (d,  $J$  = 3.9 Hz, minor isomer) in <sup>1</sup>H NMR]. <sup>1</sup>H NMR (300 MHz, CDCl<sub>3</sub>, ppm):  $\delta$  8.02 (d,  $J$  = 8.4 Hz, 2H), 7.50-7.34 (m, 7H), 5.80 (d,  $J$  = 2.5 Hz, 1H), 4.89 (ddd,  $J$  = 8.9, 3.7, 2.5 Hz, 1H), 4.42 (dd,  $J$  = 9.3, 3.7 Hz, 1H), 4.13 (appt,  $J$  = 9.3 Hz, 1H), 2.47 (s, 3H); <sup>13</sup>C NMR (75 MHz, CDCl<sub>3</sub>, ppm):  $\delta$  151.98, 145.93, 134.74, 134.51, 129.83, 129.18 (2C), 128.65, 127.03, 62.95, 62.75, 61.37, 21.76; IR (KBr): 3030, 2983, 1776, 1595, 1174, 817 cm<sup>-1</sup>; HRMS (ESI):  $m/z$  [M+H]<sup>+</sup> calculated for C<sub>17</sub>H<sub>17</sub>ClNO<sub>4</sub>S: 366.0561; found: 366.0566.

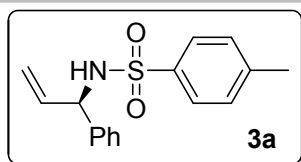

4-Methyl-*N*-(1-phenylallyl)benzenesulfonamide (**3a**) – (CAS: 58567-43-4). Compound **3a** was obtained in 14% (8 mg) yield according to the general procedure as a white solid; mp: 90-91 °C. <sup>1</sup>H NMR (300 MHz, CDCl<sub>3</sub>, ppm): δ 7.63 (d, *J* = 8.3 Hz, 2H), 7.21 – 7.07 (m, 7H), 5.84 (ddd, *J* = 17.1, 10.1, 5.9 Hz, 1H), 5.50 (brs, 1H), 5.14 – 5.02 (m, 2H), 4.97 – 4.88 (m, 1H), 2.36 (s, 3H); <sup>13</sup>C RMN (75 MHz, CDCl<sub>3</sub>, ppm): δ 143.19, 139.51,

137.72, 137.18, 129.43, 128.60, 127.68, 127.24, 127.14, 116.73, 59.95, 21.53. Isolated as a by-product. Consistent with published data.<sup>23</sup>

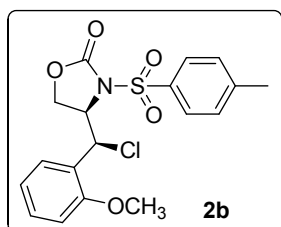

4-(Chloro(2-methoxyphenyl)methyl)-3-tosyloxazolidin-2-one (**2b**). Compound **2b** was obtained in 65% (51 mg) yield according to the general procedure as a white solid; mp: 167-169 °C; dr = 12:1 [determined by the ratio of area at δ 6.07 (d, *J* = 2.5 Hz, major isomer), 5.95 (d, *J* = 4.7 Hz, minor isomer) in <sup>1</sup>H NMR]. <sup>1</sup>H NMR (300 MHz, CDCl<sub>3</sub>, ppm): δ 8.03 (d, *J* = 8.4 Hz, 2H), 7.55 (d, *J* = 7.5 Hz, 1H), 7.38-7.32 (m, 3H), 7.01 (t, *J* = 7.5 Hz, 1H), 6.91 (d, *J* = 8.2 Hz, 1H), 6.07 (d, *J* = 2.5 Hz, 1H), 5.00 (ddd, *J* = 8.9, 3.6, 2.5 Hz, 1H), 4.32

(dd, *J* = 9.3, 3.6 Hz, 1H), 4.05 (appt, *J* = 9.3 Hz, 1H), 3.95 (s, 3H), 2.45 (s, 3H); <sup>13</sup>C RMN (75 MHz, CDCl<sub>3</sub>, ppm): δ 155.98, 152.38, 145.73, 135.00, 130.53, 129.84, 129.21, 128.70, 128.60, 122.93, 121.03, 110.67, 63.34, 58.85, 58.83, 55.78, 21.85; IR (KBr): 3003, 2954, 1774, 1597, 1242, 1178, 819 cm<sup>-1</sup>; HRMS (ESI): *m/z* [M+H]<sup>+</sup> calculated for C<sub>18</sub>H<sub>19</sub>ClNO<sub>5</sub>S: 396.0667; found: 396.0671.

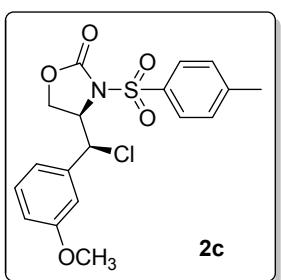

4-(Chloro(3-methoxyphenyl)methyl)-3-tosyloxazolidin-2-one (**2c**). Compound **2c** was obtained in 60% (47 mg) yield according to the general procedure as a white solid; mp: 126-128 °C; dr = 8:1 [determined by the ratio of area at δ 5.76 (d, *J* = 2.3 Hz, major isomer), 5.52 (d, *J* = 3.8 Hz, minor isomer) in <sup>1</sup>H NMR]. <sup>1</sup>H NMR (300 MHz, CDCl<sub>3</sub>, ppm): δ 8.01 (d, *J* = 8.4 Hz, 2H), 7.37 (d, *J* = 8.4 Hz, 2H), 7.31 (d, *J* = 7.8 Hz, 1H), 7.04-6.96 (m, 3H), 6.89 (dd, *J* = 8.0, 2.1 Hz, 1H), 5.76 (d, *J* = 2.4 Hz, 1H), 4.89 (ddd, *J* = 9.1, 3.6, 2.4 Hz, 1H), 4.39 (dd, *J* = 9.1, 3.6 Hz, 1H), 4.12 (appt, *J* = 9.1 Hz, 1H), 3.82 (s, 3H), 2.45 (s, 3H); <sup>13</sup>C NMR (75 MHz,

CDCl<sub>3</sub>, ppm): δ 160.16, 152.04, 145.97, 136.31, 134.56, 130.35, 129.87, 128.67, 119.15, 114.31, 113.13, 63.11, 62.74, 61.37, 55.47, 21.79; IR (KBr): 3089, 2976, 1764, 1583, 1201, 1170, 800, 700 cm<sup>-1</sup>; HRMS (ESI): *m/z* [M+H]<sup>+</sup> calculated for C<sub>18</sub>H<sub>19</sub>ClNO<sub>5</sub>S: 396.0667; found: 396.0668.

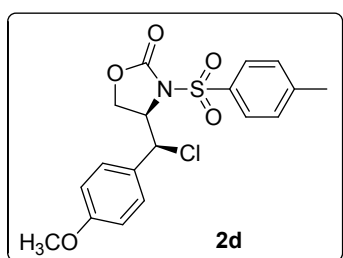

4-(Chloro(4-methoxyphenyl)methyl)-3-tosyloxazolidin-2-one (**2d**). Compound **2d** was obtained in 55% (43 mg) yield according to the general procedure as a white solid; mp: 148-150 °C; dr = 8:1 [determined by the ratio of area at δ 5.51 (brs, major isomer), 5.14 (d, *J* = 5.4 Hz, minor isomer) in <sup>1</sup>H NMR]. <sup>1</sup>H NMR (300 MHz, CDCl<sub>3</sub>, ppm): δ 8.02 (d, *J* = 8.3 Hz, 2H), 7.38 (d, *J* = 8.3 Hz, 2H), 7.33 (d, *J* = 8.7 Hz, 2H), 6.92 (d, *J* = 8.7 Hz, 2H), 5.51 (brs, 1H), 4.57 (ddd, *J* = 8.9, 3.8, 2.1 Hz, 1H), 4.37 (dd, *J* = 8.9, 3.8 Hz, 1H), 3.98 (appt, *J* = 8.9 Hz, 1H), 3.81 (s, 3H), 2.46 (s, 3H); <sup>13</sup>C NMR (75 MHz,

CDCl<sub>3</sub>, ppm): δ 159.71, 152.75, 145.94, 135.01, 130.05, 128.59, 126.88, 114.45, 71.57, 62.52, 62.15, 55.48, 29.84, 21.88; IR (KBr): 3003, 2924, 1770, 1510, 1251, 1172, 817 cm<sup>-1</sup>; HRMS (ESI): *m/z* [M+H]<sup>+</sup> calculated for C<sub>18</sub>H<sub>19</sub>ClNO<sub>5</sub>S: 396.0667; found: 396.0682.

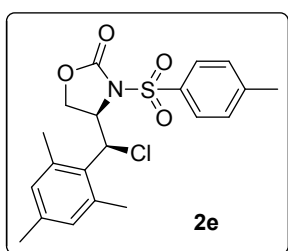

4-(Chloro(mesityl)methyl)-3-tosyloxazolidin-2-one (**2e**). Compound **2e** was obtained in 50% (40 mg) yield according to the general procedure as a white solid; mp: 116-118 °C; dr = 16:1 [determined by the ratio of area at δ 5.84 (d, *J* = 5.0 Hz, major isomer), 4.91 (d, *J* = 7.1 Hz, minor isomer) in <sup>1</sup>H NMR]. <sup>1</sup>H NMR (300 MHz, CDCl<sub>3</sub>, ppm): δ 7.48 (d, *J* = 8.4

Hz, 2H), 7.17 (d,  $J = 8.4$  Hz, 2H), 6.94 (s, 1H), 6.72 (s, 1H), 5.84 (d,  $J = 5.0$  Hz, 1H), 4.59 (ddd,  $J = 5.0, 3.4$  Hz, 1H), 3.80 (dd,  $J = 12.2, 5.0$  Hz, 1H), 3.68 (dd,  $J = 12.2, 3.4$  Hz, 1H), 2.54 (s, 3H), 2.41 (s, 3H), 2.29 (s, 3H), 1.83 (s, 3H);  $^{13}\text{C}$  NMR (75 MHz,  $\text{CDCl}_3$ , ppm):  $\delta$  151.30, 145.57, 139.18, 138.21, 136.90, 134.42, 131.81, 130.20, 129.48, 128.43, 78.00, 58.59, 44.85, 21.83, 20.98, 20.73, 19.32; IR (KBr): 3010, 2951, 1784, 1597, 1190, 667  $\text{cm}^{-1}$ ; HRMS (ESI):  $m/z$   $[\text{M}+\text{H}]^+$  calculated for  $\text{C}_{20}\text{H}_{23}\text{ClNO}_4\text{S}$ : 408.1031; found: 408.1035.

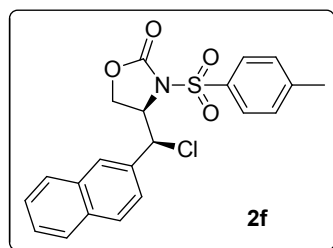

4-(Chloro(naphthalen-2-yl)methyl)-3-tosyloxazolidin-2-one (**2f**). Compound **2f** was obtained in 53% (44 mg) yield according to the general procedure as a white solid; mp: 180-182  $^{\circ}\text{C}$ ; dr >20:1 [determined by the ratio of area at  $\delta$  5.93 (d,  $J = 2.5$  Hz, major isomer), 5.69 (d,  $J = 4.5$  Hz, minor isomer) in  $^1\text{H}$  NMR].  $^1\text{H}$  NMR (300 MHz,  $\text{CDCl}_3$ , ppm):  $\delta$  8.02 (d,  $J = 8.4$  Hz, 2H), 7.92-7.85 (m, 4H), 7.56-7.52 (m, 3H), 7.34 (d,  $J = 8.4$  Hz, 2H), 5.92 (d,  $J = 2.5$  Hz, 1H), 5.01 (ddd,  $J = 9.1, 3.5$  Hz, 1H), 4.49 (dd,  $J = 9.1, 3.5$  Hz, 1H), 4.13 (appt,  $J = 9.1$  Hz, 1H), 2.45 (s, 3H);  $^{13}\text{C}$  NMR (75 MHz,  $\text{CDCl}_3$ , ppm):  $\delta$  152.16, 146.03, 134.66, 133.43, 133.16, 132.17, 129.93, 129.32, 128.76, 128.27, 127.89, 127.29, 127.21, 126.84, 124.24, 63.35, 63.08, 61.42, 21.90; IR (KBr): 3059, 2985, 1768, 1595, 1172, 1085, 758  $\text{cm}^{-1}$ ; HRMS (ESI):  $m/z$   $[\text{M}+\text{H}]^+$  calculated for  $\text{C}_{21}\text{H}_{19}\text{ClNO}_4\text{S}$ : 416.0718; found: 416.0713.

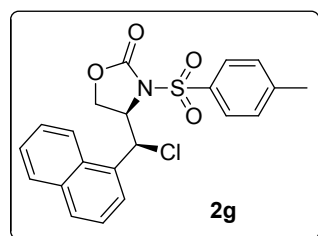

4-(Chloro(naphthalen-1-yl)methyl)-3-tosyloxazolidin-2-one (**2g**). Compound **2g** was obtained in 55% (45 mg) yield according to the general procedure as a white solid; mp: 175-178  $^{\circ}\text{C}$ ; dr >20:1 [determined by the ratio of area at  $\delta$  6.70 (brs, major isomer), 6.30 (d,  $J = 4.5$  Hz, minor isomer) in  $^1\text{H}$  NMR].  $^1\text{H}$  NMR (300 MHz,  $\text{DMSO}-d_6$ , ppm):  $\delta$  8.29 (d,  $J = 8.6$  Hz, 1H), 8.10 (d,  $J = 8.4$  Hz, 2H), 8.05 (t,  $J = 8.1$  Hz, 2H), 7.86 (d,  $J = 7.2$  Hz, 1H), 7.76 (t,  $J = 7.2$  Hz, 1H), 7.69-7.56 (m, 2H), 7.52 (d,  $J = 8.4$  Hz, 2H), 6.62 (brs, 1H), 5.30 (dt,  $J = 9.0, 3.0$  Hz, 1H), 4.47 (dd,  $J = 9.0, 3.0$  Hz, 1H), 4.31 (appt,  $J = 9.3$  Hz, 1H), 2.44 (s, 3H);  $^{13}\text{C}$  NMR (75 MHz,  $\text{DMSO}-d_6$ , ppm):  $\delta$  151.80, 145.91, 134.15, 133.30, 130.10, 129.94, 129.86, 129.64, 129.10, 128.59, 127.50, 126.47, 126.07, 125.47, 122.40, 63.46, 61.46, 59.47, 21.22; IR (KBr): 3041, 2999, 1774, 1595, 1176, 781  $\text{cm}^{-1}$ ; HRMS (ESI):  $m/z$   $[\text{M}+\text{H}]^+$  calculated for  $\text{C}_{21}\text{H}_{19}\text{ClNO}_4\text{S}$ : 416.0718; found: 416.0713.

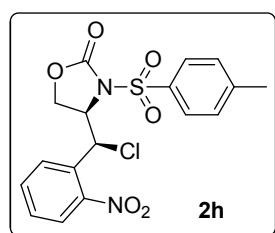

4-(Chloro(2-nitrophenyl)methyl)-3-tosyloxazolidin-2-one (**2h**). Compound **2h** was obtained in 70% (57 mg) yield according to the general procedure as a brown solid; mp: 174-176  $^{\circ}\text{C}$ ; dr >20:1 [determined by the ratio of area at  $\delta$  6.38 (d,  $J = 3.6$  Hz, major isomer), 6.11 (d,  $J = 4.1$  Hz, minor isomer) in  $^1\text{H}$  NMR].  $^1\text{H}$  NMR (300 MHz,  $\text{CDCl}_3$ , ppm):  $\delta$  8.01 (d,  $J = 8.3$  Hz, 3H), 7.90 (dd,  $J = 8.0, 1.2$  Hz, 1H), 7.74 (td,  $J = 8.0, 1.2$  Hz, 1H), 7.59 (td,  $J = 8.0, 1.2$  Hz, 1H), 7.36 (d,  $J = 8.3$  Hz, 2H), 6.38 (d,  $J = 3.6$  Hz, 1H), 5.11 (ddd,  $J = 8.5, 3.6$  Hz, 1H), 4.49 (dd,  $J = 9.0, 3.6$  Hz, 1H), 4.17 (appt,  $J = 9.0$  Hz, 1H), 2.45 (s, 3H);  $^{13}\text{C}$  NMR (75 MHz,  $\text{CDCl}_3$ , ppm):  $\delta$  152.12, 148.54, 146.01, 134.67, 133.87, 130.73, 130.62, 130.00, 129.81, 128.65, 125.60, 63.31, 59.91, 58.03, 21.87; IR (KBr): 3091, 2927, 1791, 1529, 1379, 1350, 1170, 700  $\text{cm}^{-1}$ ; HRMS (ESI):  $m/z$   $[\text{M}+\text{H}]^+$  calculated for  $\text{C}_{17}\text{H}_{16}\text{ClN}_2\text{O}_6\text{S}$ : 411.0412; found: 411.0415.

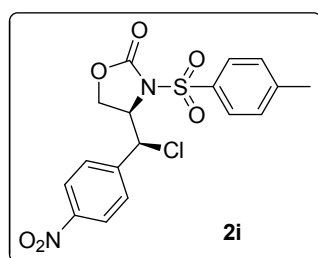

4-(Chloro(4-nitrophenyl)methyl)-3-tosyloxazolidin-2-one (**2i**). Compound **2i** was obtained in 60% (49 mg) yield according to the general procedure as a light yellow solid; mp: 153-154  $^{\circ}\text{C}$ ; dr >20:1 [determined by the ratio of area at  $\delta$  5.86 (d,  $J = 2.6$  Hz, major isomer), 5.66 (d,  $J = 4.0$  Hz, minor isomer) in  $^1\text{H}$  NMR].  $^1\text{H}$  NMR (300 MHz,  $\text{CDCl}_3$ , ppm):  $\delta$  8.27 (d,  $J = 8.8$  Hz, 2H), 7.99 (d,  $J = 8.2$  Hz, 2H), 7.69 (d,  $J = 8.8$  Hz, 2H), 7.39 (d,  $J = 8.2$  Hz, 2H), 5.86 (d,  $J = 2.6$  Hz, 1H), 4.94 (ddd,  $J = 8.0, 3.2$  Hz, 1H), 4.35 (dd,



$J = 9.0, 3.2$  Hz, 1H), 4.18 (appt,  $J = 9.0$  Hz, 1H), 2.47 (s, 3H);  $^{13}\text{C}$  NMR (75 MHz,  $\text{CDCl}_3$ , ppm):  $\delta$  151.79, 148.40, 146.38, 141.74, 134.33, 130.04, 128.72, 128.52, 124.43, 63.01, 61.99, 61.10, 21.89; IR (KBr): 3080, 2981, 1778, 1517, 1377, 1350, 1184, 856  $\text{cm}^{-1}$ ; HRMS (ESI):  $m/z$   $[\text{M}+\text{H}]^+$  calculated for  $\text{C}_{17}\text{H}_{16}\text{ClN}_2\text{O}_6\text{S}$ : 411.0412; found: 411.0401.

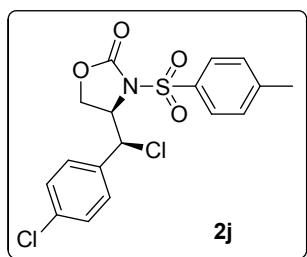

4-(Chloro(4-chlorophenyl)methyl)-3-tosyloxazolidin-2-one (**2j**). Compound **2j** was obtained in 82% (65 mg) yield according to the general procedure as a white solid; mp: 148-150  $^{\circ}\text{C}$ ; dr = 6:1 [determined by the ratio of area at  $\delta$  5.74 (d,  $J = 2.7$  Hz, major isomer), 5.52 (d,  $J = 3.9$  Hz, minor isomer) in  $^1\text{H}$  NMR].  $^1\text{H}$  NMR (300 MHz,  $\text{CDCl}_3$ , ppm):  $\delta$  7.99 (d,  $J = 8.4$  Hz, 2H), 7.41-7.34 (m, 6H), 5.74 (d,  $J = 2.7$  Hz, 1H), 4.86 (ddd,  $J = 9.3, 3.6, 2.7$  Hz, 1H), 4.35 (dd,  $J = 9.3, 3.6$  Hz, 1H), 4.14 (appt,  $J = 9.3$  Hz, 1H), 2.46 (s, 3H);  $^{13}\text{C}$  NMR (75 MHz,  $\text{CDCl}_3$ , ppm):  $\delta$  151.95, 146.11, 135.33, 134.50, 133.39, 129.94,

129.46, 128.70, 128.59, 63.06, 62.21, 61.28, 21.86; IR (KBr): 3032, 2981, 1776, 1597, 1168, 821  $\text{cm}^{-1}$ ; HRMS (ESI):  $m/z$   $[\text{M}+\text{H}]^+$  calculated for  $\text{C}_{17}\text{H}_{16}\text{Cl}_2\text{NO}_4\text{S}$ : 400.0172; found: 400.0171.

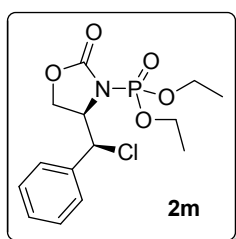

Diethyl (4-(chloro(phenyl)methyl)-2-oxooxazolidin-3-yl)phosphonate (**2m**). Compound **2m** was obtained in 58% (40 mg) yield according to the general procedure as a light-yellow oil; dr = 10:1 [determined by the ratio of area at  $\delta$  5.83 (d,  $J = 2.0$  Hz, major isomer), 5.43 (d,  $J = 4.2$  Hz, minor isomer) in  $^1\text{H}$  NMR].  $^1\text{H}$  NMR (300 MHz,  $\text{CDCl}_3$ , ppm):  $\delta$  7.50-7.31 (m, 5H), 5.83 (d,  $J = 2.3$  Hz, 1H), 4.61 (ddd,  $J = 8.6, 3.7, 2.3$  Hz, 1H), 4.49 (dd,  $J = 9.3, 3.7$  Hz, 1H), 4.42-4.24 (m, 4H), 4.17 (appt,  $J = 9.3$  Hz, 1H), 1.51-1.34 (m, 6H);  $^{13}\text{C}$  NMR (75 MHz,  $\text{CDCl}_3$ , ppm):  $\delta$  155.46 (d,  $J^2_{\text{C-P}} = 8.2$  Hz), 135.48, 129.14, 129.04, 127.20, 65.40 (d,  $J^2_{\text{C-P}} = 6.6$  Hz), 65.14 (d,

$J^2_{\text{C-P}} = 6.4$  Hz), 64.10, 63.80 (d,  $J^3_{\text{C-P}} = 8.8$  Hz), 61.96 (d,  $J^3_{\text{C-P}} = 5.2$  Hz), 16.25 (d,  $J^3_{\text{C-P}} = 2.8$  Hz), 16.16 (d,  $J^3_{\text{C-P}} = 3.3$  Hz); IR (neat): 3057, 2981, 1778, 1770, 1205, 1192, 732, 702  $\text{cm}^{-1}$ . HRMS (ESI):  $m/z$   $[\text{M}+\text{H}]^+$  calculated for  $\text{C}_{14}\text{H}_{20}\text{ClNO}_5\text{P}$ : 448.0762; found: 448.0779.

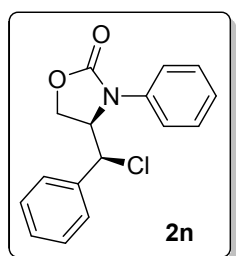

4-(Chloro(phenyl)methyl)-3-phenyloxazolidin-2-one (**2n**). Compound **2n** was obtained in 95% (54 mg) yield according to the general procedure as a white solid; mp: 98-100  $^{\circ}\text{C}$ ; dr = 6:1 [determined by the ratio of area at  $\delta$  5.22 (d,  $J = 3.7$  Hz, minor isomer), 5.17 (d,  $J = 3.0$  Hz, major isomer) in  $^1\text{H}$  NMR].  $^1\text{H}$  NMR (300 MHz,  $\text{CDCl}_3$ , ppm):  $\delta$  7.51-7.16 (m, 10H), 5.17 (d,  $J = 3.2$  Hz, 1H), 4.82 (ddd,  $J = 8.3, 4.5$  Hz, 1H), 4.60 (dd,  $J = 9.1, 4.5$  Hz, 1H), 4.34 (appt,  $J = 9.1$  Hz, 1H);  $^{13}\text{C}$  NMR (75 MHz,  $\text{CDCl}_3$ , ppm):  $\delta$  155.92, 135.72, 129.64, 129.16, 129.14, 127.15, 126.58, 123.79, 120.86, 62.64, 62.19, 61.39; IR (KBr): 3022, 2926, 1741, 1500, 1138, 736, 692

$\text{cm}^{-1}$ ; HRMS (ESI):  $m/z$   $[\text{M}+\text{H}]^+$  calculated for  $\text{C}_{16}\text{H}_{15}\text{ClNO}_4$ : 288.0786; found: 288.0788.

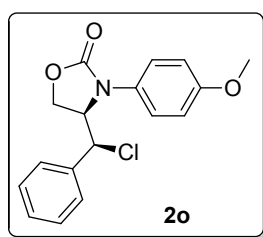

4-(Chloro(phenyl)methyl)-3-(4-methoxyphenyl)oxazolidin-2-one (**2o**) – (CAS: 1948274-67-6). Compound **2o** was obtained in 82% (52 mg) yield according to the general procedure as a brown solid; mp: 80-81.4  $^{\circ}\text{C}$ ; dr = 8:1 [determined by the ratio of area at  $\delta$  5.14 (d,  $J = 4.1$  Hz, minor isomer), 5.10 (d,  $J = 3.1$  Hz, major isomer) in  $^1\text{H}$  NMR].  $^1\text{H}$  NMR (300 MHz,  $\text{CDCl}_3$ , ppm):  $\delta$  7.39-7.27 (m, 7H), 6.94 (d,  $J = 8.9$  Hz, 2H), 5.11 (d,  $J = 3.2$  Hz, 1H), 4.68 (ddd,  $J = 9.1, 4.8, 3.2$  Hz, 1H), 4.58 (dd,  $J = 9.1, 4.8$  Hz, 1H), 4.33 (appt,  $J = 9.1$  Hz, 1H), 3.82 (s, 3H);  $^{13}\text{C}$  NMR (75 MHz,  $\text{CDCl}_3$ , ppm):  $\delta$  158.44, 156.43, 135.79, 129.10, 129.05, 128.30, 127.15, 126.32, 114.93, 62.92, 62.70, 61.64, 55.63; IR (KBr): 3070, 2999, 1749, 1514, 1251,

748, 705  $\text{cm}^{-1}$ ; HRMS (ESI):  $m/z$   $[\text{M}+\text{H}]^+$  calculated for  $\text{C}_{17}\text{H}_{17}\text{ClNO}_3$ : 318.0891; found: 318.0921. Consistent with published data.<sup>24</sup>

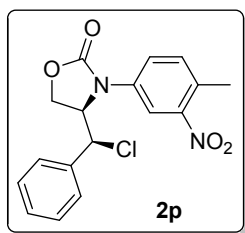

4-(Chloro(phenyl)methyl)-3-(4-methyl-3-nitrophenyl)oxazolidin-2-one (**2p**). Compound **2p** was obtained in 86% (59 mg) yield according to the general procedure as light-yellow solid; mp: 132-134 °C; dr = 6:1 [determined by the ratio of area at  $\delta$  5.18 (d,  $J$  = 4.3 Hz, minor isomer), 5.15 (d,  $J$  = 4.2 Hz, major isomer) in  $^1\text{H}$  NMR].  $^1\text{H}$  NMR (300 MHz,  $\text{CDCl}_3$ , ppm):  $\delta$  7.92 (d,  $J$  = 2.4 Hz, 1H), 7.73 (dd,  $J$  = 8.4, 2.4 Hz, 1H), 7.36-7.24 (m, 6H), 5.16 (d,  $J$  = 4.3 Hz, 1H), 4.88 (ddd,  $J$  = 9.1, 4.3 Hz, 1H), 4.63 (dd,  $J$  = 9.1, 4.3 Hz, 1H), 4.43 (appt,  $J$  = 9.1 Hz, 1H), 2.56 (s, 3H);  $^{13}\text{C}$  NMR (75 MHz,  $\text{CDCl}_3$ , ppm):  $\delta$  155.41, 149.01, 135.28, 134.82, 133.74,

131.15, 129.20, 129.10, 127.76, 127.26, 118.63, 63.43, 61.52, 61.37, 20.11; IR (KBr): 3028, 2991, 1735, 1531, 1355, 1332, 727  $\text{cm}^{-1}$ ; HRMS (ESI):  $m/z$   $[\text{M}+\text{H}]^+$  calculated for  $\text{C}_{17}\text{H}_{16}\text{ClN}_2\text{O}_4$ : 347.0793; found: 347.0796.

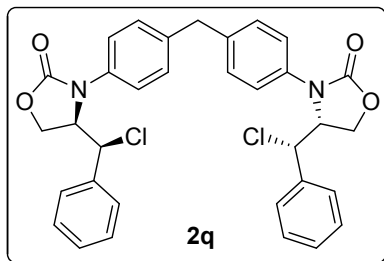

3,3'-(Methylenebis(4,1-phenylene))bis(4-(chloro(phenyl)methyl)oxazolidin-2-one (**2q**). Compound **2q** was obtained in 44% (52 mg) yield according to the general procedure as a light brown oil; dr = 8:1 [determined by the ratio of area at  $\delta$  5.20 (d,  $J$  = 3.9 Hz, minor isomer), 5.16 (d,  $J$  = 3.0 Hz, major isomer) in  $^1\text{H}$  NMR].  $^1\text{H}$  NMR (300 MHz,  $\text{CDCl}_3$ , ppm):  $\delta$  7.51-7.06 (m, 18H), 5.22-5.10 (m, 2H), 4.78 (ddd,  $J$  = 9.1, 4.5 Hz, 2H), 4.58 (dd,  $J$  = 9.1, 4.5 Hz, 2H), 4.33 (appt,  $J$  = 9.1 Hz, 2H), 4.01-3.90 (m, 2H);  $^{13}\text{C}$  NMR (75 MHz,  $\text{CDCl}_3$ , ppm):  $\delta$  156.09, 139.14,

135.66, 133.85, 130.09, 129.12, 127.16, 124.13, 62.72, 62.28, 61.48, 40.97; IR (neat): 3030, 2918, 1747, 1716, 1514, 754, 731  $\text{cm}^{-1}$ . HRMS (ESI):  $m/z$   $[\text{M}+\text{H}]^+$  calculated for  $\text{C}_{33}\text{H}_{29}\text{Cl}_2\text{N}_2\text{O}_4$ : 587.1499; found: 587.1492.

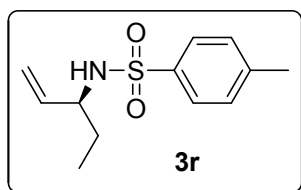

*N*-(Hex-1-en-3-yl)-4-methylbenzenesulfonamide (**3r**) – (CAS: 57981-16-5). Compound **3r** was obtained in 23% (11 mg) yield according to the general procedure as a white solid; mp: 54-56 °C.  $^1\text{H}$  NMR (300 MHz,  $\text{CDCl}_3$ , ppm):  $\delta$  7.73 (d,  $J$  = 8.1 Hz, 2H), 7.27 (d,  $J$  = 8.1 Hz, 2H), 5.53 (ddd,  $J$  = 17.0, 10.3, 6.6 Hz, 1H), 4.96 (m, 2H), 4.50 (d,  $J$  = 7.7 Hz, 1H), 3.76 (m, 1H), 2.41 (s, 3H), 1.49–1.38 (m, 1H), 1.30–1.21 (m, 1H), 0.83 (t,  $J$  = 7.2 Hz,

2H). Consistent with published data.<sup>17</sup>

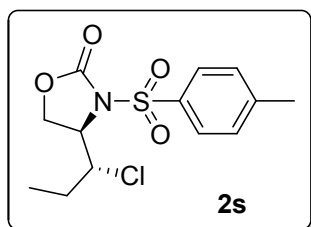

4-(1-Chloropropyl)-3-tosyloxazolidin-2-one (**2s**). Compound **2s** was obtained in 60% (38 mg) yield according to the general procedure as a white solid; mp: 175-176 °C; dr >20:1 [determined by the ratio of area at  $\delta$  4.94 – 4.84 (m, minor isomer), 4.82 – 4.67 (m, major isomer) in  $^1\text{H}$  NMR].  $^1\text{H}$  NMR (300 MHz,  $\text{CDCl}_3$ , ppm):  $\delta$  7.95 (d,  $J$  = 8.3 Hz, 2H), 7.38 (d,  $J$  = 8.2 Hz, 2H), 7.69 (d,  $J$  = 8.8 Hz, 2H), 4.77–4.72 (m, 1H), 4.47–4.41 (dd,  $J$  = 3.3, 9.7 Hz, 1H), 4.41–4.31 (m, 2H), 2.47 (s, 3H), 1.77–1.59 (m, 2H), 1.03 (t,  $J$  = 7.2

Hz, 3H);  $^{13}\text{C}$  NMR (75 MHz,  $\text{CDCl}_3$ , ppm):  $\delta$  151.92, 146.16, 134.42, 129.96, 128.42, 64.13, 62.45, 59.83, 22.78, 21.75, 10.91. HRMS (ESI):  $m/z$   $[\text{M}+\text{H}]^+$  calculated for  $\text{C}_{13}\text{H}_{17}\text{ClNO}_4\text{S}$ : 318.0561; found: 318.0569.

#### 4. Derivatization Reactions of **2a** and Characterization Data

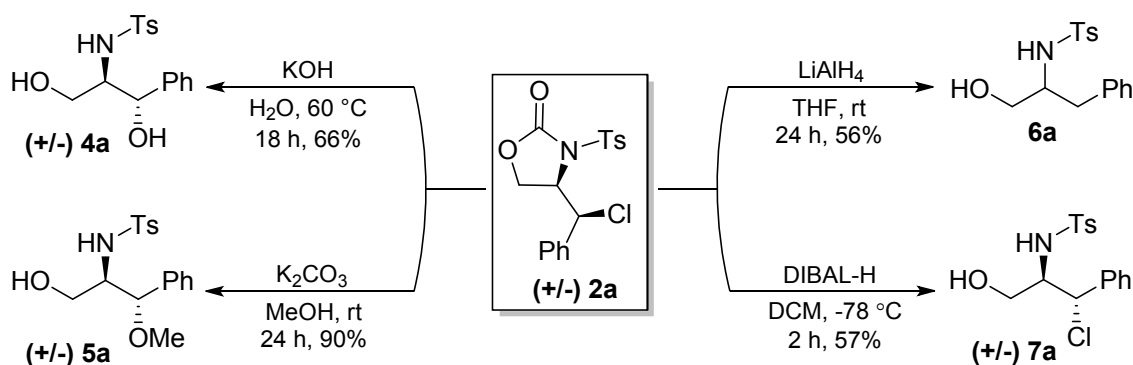

Synthesis of *N*-(1,3-dihydroxy-1-phenylpropan-2-yl)-4-methylbenzenesulfonamide (**4a**). In a 10 mL vial oxazolidinone **2a** (36.6 mg, 0.1 mmol, 1.0 equiv), KOH (28 mg, 0.5 mmol, 5.0 equiv) and 1.0 mL of water were added. The reaction was allowed to stir at 60 °C overnight. Then, the reaction was diluted with water (5 mL) and extracted with DCM (3x10 mL). The combined extracts were dried with Na<sub>2</sub>SO<sub>4</sub>, concentrated under vacuum, and purified by flash chromatography column to give the desired aminodiol **4a** in 66% (21 mg) yield as a white solid; mp: 90-93 °C. <sup>1</sup>H NMR (300 MHz, CDCl<sub>3</sub>, ppm): δ 7.72 (d, *J* = 8.3 Hz, 2H), 7.33-7.18 (m, 7H), 5.98 (brs, OH), 4.89 (d, *J* = 3.7 Hz, 1H), 3.79-3.65 (m, 1H), 3.46-3.32 (m, 2H), 2.40 (s, 3H); <sup>13</sup>C NMR (75 MHz, CDCl<sub>3</sub>, ppm): δ 143.83, 140.26, 137.41, 129.98, 128.79, 128.07, 127.17, 125.76, 76.36, 61.44, 59.00, 21.68; IR (KBr): 3508, 3406, 1598, 1450, 1091, 750, 694 cm<sup>-1</sup>. Consistent with published data.<sup>25</sup>

Synthesis of *N*-(3-hydroxy-1-methoxy-1-phenylpropan-2-yl)-4-methylbenzenesulfonamide (**5a**). In a 20 mL vial oxazolidinone **2a** (110 mg, 0.3 mmol, 1.0 equiv.), K<sub>2</sub>CO<sub>3</sub> (207 mg, 1.5 mmol, 5.0 equiv.) and 3.0 mL of MeOH were added. The reaction was allowed to stir at room temperature for 24 h. Then, the reaction was diluted with water (5 mL) and extracted with DCM (3x10 mL). The combined extracts were dried with Na<sub>2</sub>SO<sub>4</sub>, concentrated under vacuum and purified by flash chromatography column to give the desired product **5a** in 90% (90 mg) yield as a colorless oil; <sup>1</sup>H NMR (300 MHz, CDCl<sub>3</sub>, ppm): δ 7.72 (d, *J* = 8.3 Hz, 2H), 7.37-7.12 (m, 7H), 5.58 (d, *J* = 8.5 Hz, 1H), 4.40 (d, *J* = 3.8 Hz, 1H), 3.72 (dd, *J* = 11.6, 3.3 Hz, 1H), 3.40-3.30 (m, 1H), 3.22 (s, 3H), 2.41 (s, 3H); <sup>13</sup>C NMR (75 MHz, CDCl<sub>3</sub>, ppm): δ 143.58, 137.77, 137.49, 129.85, 128.87, 128.25, 127.12, 126.53, 86.06, 60.66, 59.03, 58.15, 21.62; IR (neat): 3500, 3277, 1598, 1454, 1091, 759, 704 cm<sup>-1</sup>. Consistent with published data.<sup>25</sup>

Synthesis of *N*-(1-hydroxy-3-phenylpropan-2-yl)-4-methylbenzenesulfonamide (**6a**) – (CAS: 170304-98-0). In a 10 mL vial oxazolidinone **2a** (73 mg, 0.2 mmol, 1.0 equiv.) was solubilized in 2.0 mL of anhydrous THF. LiAlH<sub>4</sub> (76 mg, 2.0 mmol, 10 equiv.) was added under nitrogen atmosphere. The reaction was allowed to stir at room temperature for 24 h. Then, the reaction was quenched with water (5 mL) and extracted with DCM (3x10 mL). The combined extracts were dried with Na<sub>2</sub>SO<sub>4</sub>, concentrated under vacuum and purified by flash chromatography column (7:3 hexane/AcOEt) to give the desired product **6a** in 57% (34 mg) yield as a white solid; mp: 70-74 °C; <sup>1</sup>H NMR (300 MHz, CDCl<sub>3</sub>, ppm): δ 7.58 (d, *J* = 8.3 Hz, 2H), 7.24-7.14 (m, 5H), 7.03-6.94 (m, 2H), 4.72 (d, *J* = 7.1 Hz, 1H), 3.71-3.39 (m, 3H), 2.84-2.62 (m, 2H), 2.42 (s, 3H). <sup>13</sup>C NMR (75 MHz, CDCl<sub>3</sub>, ppm): δ 143.59, 136.92, 136.72, 129.85, 129.28, 128.86, 127.19, 126.93, 64.20, 56.65, 37.96, 21.68; IR (KBr): 3462, 3147, 1598, 1467, 1095, 746, 700 cm<sup>-1</sup>. Consistent with published data.<sup>26</sup>

---

Synthesis of *N*-(1-chloro-3-hydroxy-1-phenylpropan-2-yl)-4-methylbenzenesulfonamide (**7a**). In a 10 mL vial oxazolidinone **2a** (73 mg, 0.2 mmol, 1.0 equiv.) was solubilized in 2.0 mL of anhydrous DCM. The solution was cooled at -78 °C and DIBAL-H (2.0 mL, 1.0 M in Hexane) was added dropwise under nitrogen atmosphere. The reaction was allowed to stir at -78 °C for 2 h. After 1 h at room temperature a saturated solution of Rochelle's salt (10 mL) was slowly added, the mixture was allowed to stir for 1 h. Then, the reaction was extracted with DCM (3x10 mL). The combined extracts were dried with Na<sub>2</sub>SO<sub>4</sub>, concentrated under vacuum, and purified by flash chromatography column (7:3 hexane/AcOEt) to give the desired product **7a** in 56% (38 mg) yield as a colorless oil; <sup>1</sup>H NMR (300 MHz, CDCl<sub>3</sub>, ppm): δ 7.83 (d, *J* = 8.3 Hz, 2H), 7.33-7.27 (m, 5H), 7.19-7.11 (m, 2H), 4.33 (ddd, *J* = 13.1, 9.9, 3.0 Hz, 1H), 4.18 (ddd, *J* = 13.1, 8.5, 4.9 Hz, 1H), 4.03 (d, *J* = 4.4 Hz, 1H), 3.19 (ddd, *J* = 8.5, 4.4, 3.0 Hz, 1H), 3.12 (dd, *J* = 9.9, 4.9 Hz, 1H), 2.41 (s, 3H); <sup>13</sup>C NMR (300 MHz, CDCl<sub>3</sub>, ppm): δ 144.55, 137.21, 134.72, 129.84, 128.78, 128.55, 127.30, 126.55, 60.83, 54.92, 46.46, 21.76; IR (neat): 3522, 3064, 1597, 1450, 1087, 813, 759, 698 cm<sup>-1</sup>; HRMS (ESI): *m/z* [M-Cl]<sup>+</sup> calculated for C<sub>16</sub>H<sub>18</sub>NO<sub>3</sub>S: 304.1007; found: 304.1012; *m/z* [M+NH<sub>4</sub>]<sup>+</sup> calculated for C<sub>16</sub>H<sub>22</sub>ClN<sub>2</sub>O<sub>3</sub>S: 357.1034; found: 357.1040.

## 5. Complete Details of Optimization of Reaction Conditions

**Table S1.** Screening of Oxidant Loading<sup>a</sup>

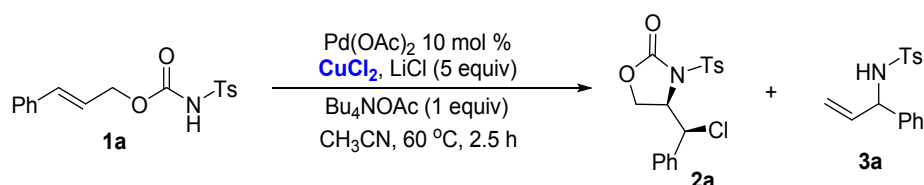

| Entry | $\text{CuCl}_2$ | <b>1a</b> <sup>b</sup> | <b>2a</b> <sup>b</sup> | <b>3a</b> <sup>b</sup> |
|-------|-----------------|------------------------|------------------------|------------------------|
| 1     | 2 equiv         | 26%                    | 30%                    | 44%                    |
| 2     | 3 equiv         | 10%                    | 70%                    | 20%                    |
| 3     | 4 equiv         | 10%                    | 75%                    | 15%                    |
| 4     | <b>5 equiv</b>  | <b>9%</b>              | <b>76%</b>             | <b>15%</b>             |

<sup>a</sup>Reactions conditions: **1a** (0.20 mmol),  $\text{Pd}(\text{OAc})_2$  (10 mol %),  $\text{CuCl}_2$  (x mmol),  $\text{Bu}_4\text{NOAc}$  (0.2 mmol), LiCl (1.0 mmol) in  $\text{CH}_3\text{CN}$  (2.5 mL). <sup>b</sup>Compounds distribution determined by  $^1\text{H}$  NMR spectroscopy of the crude reaction mixtures.

**Table S2.** Screening of Palladium Catalyst<sup>a</sup>

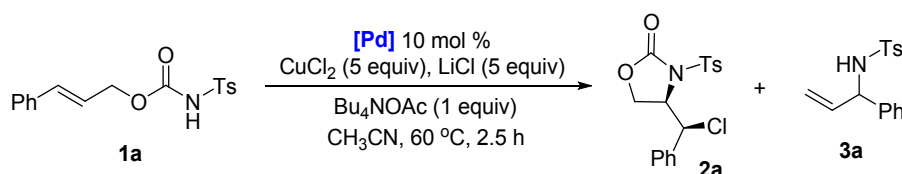

| Entry | [Pd]                                                      | <b>1a</b> <sup>b</sup> | <b>2a</b> <sup>b</sup> | <b>3a</b> <sup>b</sup> |
|-------|-----------------------------------------------------------|------------------------|------------------------|------------------------|
| 1     | $\text{PdCl}_2$                                           | 10%                    | 76%                    | 14%                    |
| 2     | $\text{Pd}(\text{OAc})_2$                                 | 6%                     | 79%                    | 15%                    |
| 3     | $\text{Pd}(\text{TFA})_2$                                 | 14%                    | 72%                    | 14%                    |
| 4     | <b><math>\text{PdCl}_2(\text{CH}_3\text{CN})_2</math></b> | <b>8%</b>              | <b>79%</b>             | <b>13%</b>             |
| 5     | $\text{PdCl}_2(\text{PhCN})_2$                            | 9%                     | 76%                    | 15%                    |
| 6     | $\text{Pd}(\text{NO}_3)_2$                                | 18%                    | 68%                    | 14%                    |
| 7     | $\text{PdCl}_2(\text{TMEDA})$                             | 61%                    | 39%                    | -                      |
| 8     | $\text{PdCl}_2(\text{PPh}_3)_2$                           | 39%                    | 61%                    | -                      |
| 9     | $\text{Pd}(\text{PPh}_3)_4$                               | 17%                    | 68%                    | 15%                    |

<sup>a</sup>Reactions conditions: **1a** (0.20 mmol), [Pd] (10 mol %),  $\text{CuCl}_2$  (1.0 mmol),  $\text{Bu}_4\text{NOAc}$  (0.2 mmol), LiCl (1.0 mmol) in  $\text{CH}_3\text{CN}$  (2.5 mL). <sup>b</sup>Compounds distribution determined by  $^1\text{H}$  NMR spectroscopy of the crude reaction mixtures.

**Table S3.** Screening of Solvents<sup>a</sup>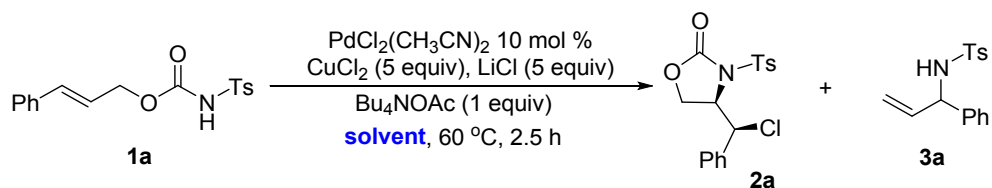

| Entry | Solvent                 | 1a <sup>b</sup> | 2a <sup>b</sup> | 3a <sup>b</sup> |
|-------|-------------------------|-----------------|-----------------|-----------------|
| 1     | <b>CH<sub>3</sub>CN</b> | <b>8%</b>       | <b>79%</b>      | <b>13%</b>      |
| 2     | THF                     | 16%             | 68%             | 16%             |
| 3     | Toluene                 | 10%             | 56%             | 17%             |
| 4     | DCM                     | 9%              | 47%             | 24%             |
| 5     | Hexane                  | 18%             | 63%             | 19%             |
| 6     | MeOH                    | 77%             | 23%             | -               |
| 7     | AcOEt                   | 11%             | 62%             | 27%             |
| 8     | DMF                     | 63%             | 31%             | 6%              |
| 9     | DMSO                    | 51%             | 42%             | 7%              |
| 10    | 1,4-Dioxane             | 100%            | -               | -               |

<sup>a</sup>Reactions conditions: **1a** (0.20 mmol),  $\text{PdCl}_2(\text{CH}_3\text{CN})_2$  (10 mol %),  $\text{CuCl}_2$  (1.0 mmol),  $\text{Bu}_4\text{NOAc}$  (0.2 mmol),  $\text{LiCl}$  (1.0 mmol) in solvent (2.5 mL). <sup>b</sup>Compounds distribution determined by <sup>1</sup>H NMR spectroscopy of the crude reaction mixtures.

**Table S4.** Screening of Catalyst Loading<sup>a</sup>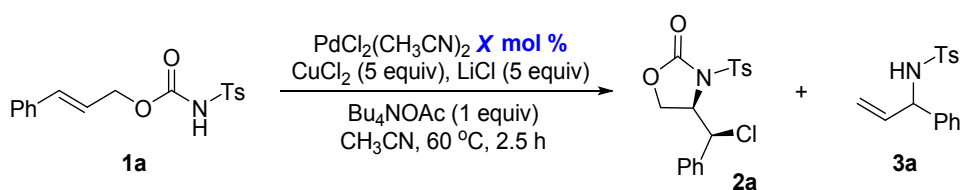

| Entry | $\text{PdCl}_2(\text{CH}_3\text{CN})_2$ | 1a <sup>b</sup> | 2a <sup>b</sup> | 3a <sup>b</sup> |
|-------|-----------------------------------------|-----------------|-----------------|-----------------|
| 1     | <b>10 mol %</b>                         | <b>8%</b>       | <b>79%</b>      | <b>13%</b>      |
| 2     | 5 mol %                                 | 54%             | 46%             | -               |
| 3     | 1 mol %                                 | 85%             | 15%             | -               |
| 4     | 0.1 mol %                               | 99%             | 1%              | -               |

<sup>a</sup>Reactions conditions: **1a** (0.20 mmol),  $\text{PdCl}_2(\text{CH}_3\text{CN})_2$  (x mol %),  $\text{CuCl}_2$  (1.0 mmol),  $\text{Bu}_4\text{NOAc}$  (0.2 mmol),  $\text{LiCl}$  (1.0 mmol) in  $\text{CH}_3\text{CN}$  (2.5 mL). <sup>b</sup>Compounds distribution determined by <sup>1</sup>H NMR spectroscopy of the crude reaction mixtures.

**Table S5.** Screening of Concentration of Substrate<sup>a</sup>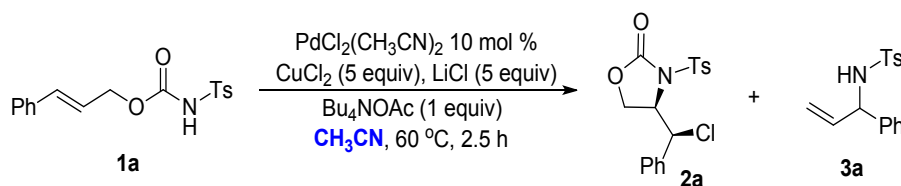

| Entry | Concentration | 1a <sup>b</sup> | 2a <sup>b</sup> | 3a <sup>b</sup> |
|-------|---------------|-----------------|-----------------|-----------------|
| 1     | 0.08 M        | 25%             | 66%             | 9%              |
| 2     | 0.10 M        | 9%              | 77%             | 14%             |
| 3     | 0.15 M        | 8%              | 77%             | 15%             |

<sup>a</sup>Reactions conditions: **1a** (0.20 mmol), PdCl<sub>2</sub>(CH<sub>3</sub>CN)<sub>2</sub> (10 mol %), CuCl<sub>2</sub> (1.0 mmol), Bu<sub>4</sub>NOAc (0.2 mmol), LiCl (1.0 mmol) in CH<sub>3</sub>CN (x mL). <sup>b</sup>Compounds distribution determined by <sup>1</sup>H NMR spectroscopy of the crude reaction mixtures.

**Table S6.** Control Experiments of Synthesis of **2a**<sup>a</sup>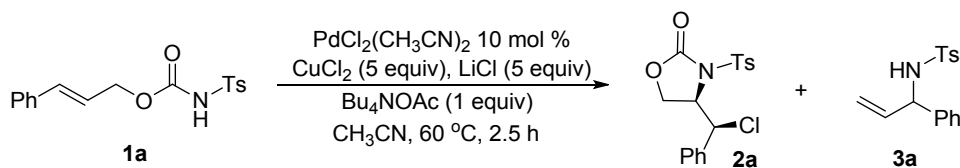

| Entry          | PdCl <sub>2</sub> (CH <sub>3</sub> CN) <sub>2</sub> | CuCl <sub>2</sub> | LiCl | Bu <sub>4</sub> NOAc | 1a <sup>b</sup> | 2a <sup>b</sup> | 3a <sup>b</sup> |
|----------------|-----------------------------------------------------|-------------------|------|----------------------|-----------------|-----------------|-----------------|
| 1 <sup>c</sup> | -                                                   | +                 | +    | +                    | 100%            | -               | -               |
| 2 <sup>d</sup> | +                                                   | -                 | +    | +                    | 13%             | -               | 87%             |
| 6 <sup>d</sup> | + <sup>e</sup>                                      | -                 | +    | +                    | 60%             | -               | 40%             |
| 3 <sup>f</sup> | +                                                   | +                 | -    | +                    | 100%            | -               | -               |
| 4 <sup>g</sup> | +                                                   | +                 | +    | -                    | 85%             | 10%             | 5%              |
| 5              | +                                                   | +                 | +    | +                    | 8%              | 80%             | 12%             |

<sup>a</sup>Reaction conditions: **1a** (0.20 mmol), PdCl<sub>2</sub>(CH<sub>3</sub>CN)<sub>2</sub> (10 mol %), CuCl<sub>2</sub> (1.0 mmol), Bu<sub>4</sub>NOAc (0.2 mmol), LiCl (1.0 mmol) in CH<sub>3</sub>CN. <sup>b</sup>Compounds distribution determined by <sup>1</sup>H NMR spectroscopy of the crude reaction mixtures.

<sup>c</sup>Without PdCl<sub>2</sub>(CH<sub>3</sub>CN)<sub>2</sub>. <sup>d</sup>Without CuCl<sub>2</sub>. <sup>e</sup>PdCl<sub>2</sub>(CH<sub>3</sub>CN)<sub>2</sub> (100 mol %). <sup>f</sup>Without LiCl. <sup>g</sup>Without Bu<sub>4</sub>NOAc.

---

## 6. $^1\text{H}$ NMR Titration Experiments Procedure (at 25 °C)

A solution (A) of  $\text{PdCl}_2(\text{CH}_3\text{CN})_2$  (5.2 mg, 0.02 mmol, 1.0 equiv) and carbamate **1a** (6.63 mg, 0.02 mmol, 1.0 equiv) in  $\text{CD}_3\text{CN}$  (1.0 mL,  $c = 0.02$  M) was prepared. A solution (B) of tetrabutylammonium acetate ( $\text{Bu}_4\text{NOAc}$ , 6.0 mg, 0.02 mmol, 1.0 equiv) in  $\text{CD}_3\text{CN}$  (1.0 mL,  $c = 0.02$  M) was prepared.

Figure 2 presents the titration of a 1:1 mixture of **1a** and  $\text{PdCl}_2(\text{CH}_3\text{CN})_2$  up to an equimolar amount of  $\text{Bu}_4\text{NOAc}$  leading to the gradual formation of two new sets of signals. After 10 minutes from the solution (A) preparation a  $^1\text{H}$  NMR spectrum was recorded and showed no reaction (bottom spectrum – 0 mol % of  $\text{Bu}_4\text{NOAc}$ ). Then to 0.4 mL of solution (A) were added stepwise 20  $\mu\text{L}$  of solution (B) (0.05 equiv  $\text{Bu}_4\text{NOAc}$ ). After each addition, a  $^1\text{H}$  NMR spectra was recorded at 10-minutes intervals. After the addition of 20 mol %  $\text{Bu}_4\text{NOAc}$  (80  $\mu\text{L}$  of solution B in total) addition was continued in 40  $\mu\text{L}$  steps (0.10 equiv  $\text{Bu}_4\text{NOAc}$ ) up to 1.0 equiv of tetrabutylammonium acetate was added in total.



## 7. Relative Stereochemistry Determination

### Compound **2o**

The relative stereochemistry of the major and minor **2o** diastereomers was determined by comparing the NMR data with those described by Xu and co-workers<sup>24</sup> for the characterization of both diastereomers. The main aspects of the <sup>1</sup>H and <sup>13</sup>C NMR to differentiate both **2o** diastereomers involve the signals of the hydrogens designated as Ha; Hb; Hc; and Hc' as well as carbons C<sub>1</sub>; C<sub>2</sub>; and C<sub>3</sub>. The Table S7 below collect the data related to these hydrogens and carbons obtained for the major and minor **2o** diastereomers and compared to those described in the literature. A determining feature in the differentiation between **2o** diastereomers involves the coupling constant data between Ha and Hb; for the major diastereomer (*anti*-addition product)  $J_{\text{HaHb}} = 3.2$  Hz, while for the minor diastereomer (*syn*-addition product)  $J_{\text{HaHb}} = 4.0$  Hz. The determined trend for the  $J_{\text{HaHb}}$  coupling constants for the **2a-s** diastereomers products, follow, in general, the same diagnostic described above for the **2o** diastereomers.

**Table S7.** Selected relevant NMR signals data ( $\delta$  in ppm) of major and minor **2o** diastereomers<sup>a</sup>

| <br><b>2o (maj diast)</b> | <b>2o (maj diast)</b>        |                                    |                                    |
|---------------------------|------------------------------|------------------------------------|------------------------------------|
|                           | Hydrogen                     | <b>2o (maj diast)</b>              | Literature data <sup>24</sup>      |
| <br><b>2o (min diast)</b> | <b>Ha</b>                    | 5.11 (d, $J = 3.2$ Hz)             | 5.11 (d, $J = 3.2$ Hz)             |
|                           | <b>Hb</b>                    | 4.68 (ddd, $J = 9.1, 4.8, 3.2$ Hz) | 4.68 (ddd, $J = 8.8, 4.8, 3.2$ Hz) |
|                           | <b>Hc</b>                    | 4.58 (dd, $J = 9.1, 4.8$ Hz)       | 4.60 (dd, $J = 9.2, 4.8$ Hz)       |
|                           | <b>Hc'</b>                   | 4.33 (appt, $J = 9.1$ Hz)          | 4.34 (t, $J = 9.0$ Hz)             |
|                           | Carbon                       |                                    |                                    |
|                           | <b>C<sub>1</sub></b>         | 61.64                              | 61.6                               |
|                           | <b>C<sub>2</sub></b>         | 62.92                              | 63.0                               |
| <b>C<sub>3</sub></b>      | 62.70                        | 62.7                               |                                    |
| <b>2o (min diast)</b>     |                              |                                    |                                    |
| Hydrogen                  | <b>2o (min diast)</b>        | Literature data <sup>24</sup>      |                                    |
| <b>Ha</b>                 | 5.14 (d, $J = 4.0$ Hz)       | 5.15 (d, $J = 4.0$ Hz)             |                                    |
| <b>Hb</b>                 | 4.96 (dt, $J = 8.1, 4.0$ Hz) | 4.98-4.93 (m Hz)                   |                                    |
| <b>Hc</b>                 | 4.53-4.48 (m)                | 4.53 (dd, $J = 9.6, 3.7$ Hz)       |                                    |
| <b>Hc'</b>                | 4.46-4.45 (m)                | 4.46 (t, $J = 9.1$ Hz)             |                                    |
| Carbon                    |                              |                                    |                                    |
| <b>C<sub>1</sub></b>      | 59.7                         | 59.6                               |                                    |
| <b>C<sub>2</sub></b>      | 61.5                         | 61.5                               |                                    |
| <b>C<sub>3</sub></b>      | 62.7                         | 62.7                               |                                    |

<sup>a</sup> <sup>1</sup>H (300 MHz) and <sup>13</sup>C NMR (75 MHz) NMR (in CDCl<sub>3</sub>)

The Figure S1 illustrates the partial spectra of  $^1\text{H}$  NMR (image on the left) and 2D HSQC NMR (image on the right) used for the chemical shift assignments and, consequently, for the designation of the relative stereochemistry of the major and minor **2o** diastereomer. To analyze the complete  $^1\text{H}$ ,  $^{13}\text{C}$ , COSY and HSQC NMR spectra obtained for compound **2o**, see pages S185-S188.

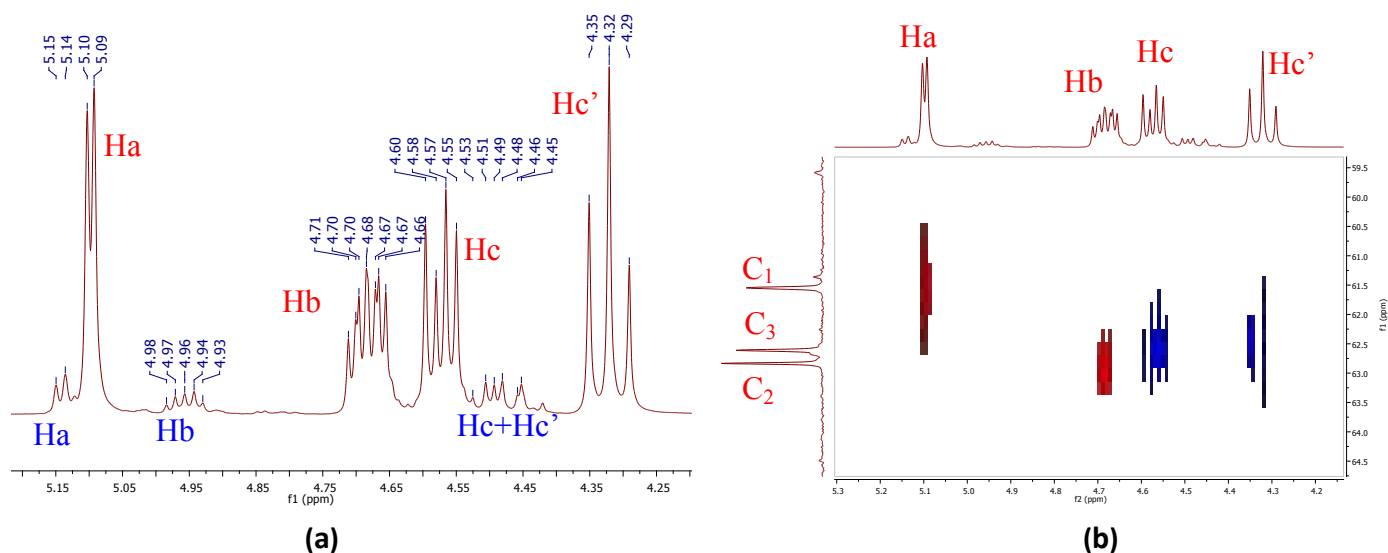

**Figure S1.** (a) Partial  $^1\text{H}$  NMR spectra (5.2 – 4.2 ppm) of compound **2o**; (b) Partial 2D HSQC NMR spectra ( $\delta_{\text{C}}/\delta_{\text{H}}$  65.0 – 59.0/5.3 – 4.1 ppm) of compound **2o**.

## Compound 2a

The relative stereochemistry of **2a** diastereomers was designed based on  $^1\text{H}$ ,  $^{13}\text{C}$ , COSY, HSQC, HMBC, and NOESY NMR analysis data. Table S8 shows the chemical shift assignments for major and minor **2a** diastereomers. The determined trend of the  $^1\text{H}$  and  $^{13}\text{C}$  NMR data for the **2a** diastereomers products, follow, in general, the same diagnostic described above for the **2o** diastereomers. The main aspects of the  $^1\text{H}$  and  $^{13}\text{C}$  NMR to differentiate both **2a** diastereomers involve the signals of the hydrogens designated as Ha; Hb; Hc; and Hc' as well as carbons C<sub>1</sub>; C<sub>2</sub>; and C<sub>3</sub>. As for **2o** diastereomers, the determining feature in the differentiation between **2a** diastereomers involves the coupling constant data between Ha and Hb; for the major diastereomer (*anti*-addition product)  $J_{\text{HaHb}} = 2.5$  Hz, while for the minor diastereomer (*syn*-addition product)  $J_{\text{HaHb}} = 4.0$  Hz. Also, the NOE's between hydrogens **Ha-Hb**, **Ha-Hd**, **Ha-Hi**, **Ha-Hc'**, and **Ha-Hd**, were valuable in establishing the **2a** major diastereomer relative stereochemistry.

**Table S8.** Complete assigned hydrogens and carbons of the  $^1\text{H}$  and  $^{13}\text{C}$  NMR signals data ( $\delta$  in ppm) of major and minor **2a** diastereomers<sup>a</sup>

|                                                                                                                 |                    | <b>2a (maj diast)</b>              |            |        |  |
|-----------------------------------------------------------------------------------------------------------------|--------------------|------------------------------------|------------|--------|--|
| 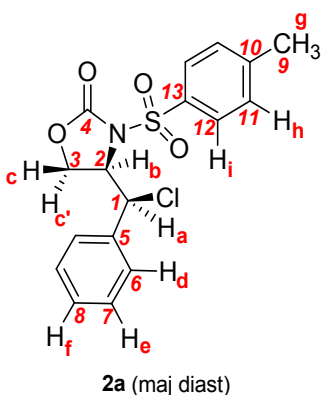 <p><b>2a (maj diast)</b></p>  | <b>Hg</b>          | 2.47 (s)                           | <b>C9</b>  | 21.76  |  |
|                                                                                                                 | <b>Hc'</b>         | 4.13 (appt, $J = 9.3$ Hz)          | <b>C2</b>  | 61.37  |  |
|                                                                                                                 | <b>Hc</b>          | 4.42 (dd, $J = 9.3, 3.7$ Hz)       | <b>C1</b>  | 62.75  |  |
|                                                                                                                 | <b>Hb</b>          | 4.89 (ddd, $J = 8.9, 3.7, 2.5$ Hz) | <b>C3</b>  | 62.95  |  |
|                                                                                                                 | <b>Ha</b>          | 5.80 (d, $J = 2.5$ Hz)             | <b>C6</b>  | 127.03 |  |
|                                                                                                                 | <b>Hd+He+Hf+Hh</b> | 7.50-7.34 (m)                      | <b>C12</b> | 128.65 |  |
|                                                                                                                 | <b>Hi</b>          | 8.02 (d, $J = 8.4$ Hz)             | <b>C7</b>  | 129.18 |  |
|                                                                                                                 |                    |                                    | <b>C8</b>  | 129.18 |  |
|                                                                                                                 |                    |                                    | <b>C11</b> | 129.83 |  |
|                                                                                                                 |                    |                                    | <b>C13</b> | 134.51 |  |
|                                                                                                                 |                    |                                    | <b>C5</b>  | 134.74 |  |
|                                                                                                                 |                    |                                    | <b>C10</b> | 145.93 |  |
|                                                                                                                 |                    |                                    | <b>C4</b>  | 151.98 |  |
|                                                                                                                 |                    | <b>2a (min diast)</b>              |            |        |  |
|  <p><b>2a (min diast)</b></p> | <b>Hg</b>          | 2.40 (s)                           | <b>C9</b>  | 21.49  |  |
|                                                                                                                 | <b>Hc'</b>         | 4.26 (dd, $J = 9.4, 8.6$ Hz)       | <b>C2</b>  | 61.01  |  |
|                                                                                                                 | <b>Hc</b>          | 4.50 (dd, $J = 9.7, 2.8$ Hz)       | <b>C1</b>  | 60.46  |  |
|                                                                                                                 | <b>Hb</b>          | 4.78 (ddd, $J = 6.4, 4.0, 2.8$ Hz) | <b>C3</b>  | 63.40  |  |
|                                                                                                                 | <b>Ha</b>          | 5.55 (d, $J = 4.0$ Hz)             | <b>C6</b>  | 127.21 |  |
|                                                                                                                 | <b>Hd+He+Hf+Hh</b> | 7.50-7.34 (m)                      | <b>C12</b> | 128.79 |  |
|                                                                                                                 | <b>Hi</b>          | 7.97 (d, $J = 8.3$ Hz)             | <b>C7</b>  | 128.16 |  |
|                                                                                                                 |                    |                                    | <b>C8</b>  | 128.36 |  |
|                                                                                                                 |                    |                                    | <b>C11</b> | 130.04 |  |
|                                                                                                                 |                    |                                    | <b>C13</b> | 132.51 |  |
|                                                                                                                 |                    |                                    | <b>C5</b>  | 137.11 |  |
|                                                                                                                 |                    |                                    | <b>C10</b> | 146.18 |  |
|                                                                                                                 |                    |                                    | <b>C4</b>  | 151.34 |  |

<sup>a</sup>  $^1\text{H}$  (300 MHz) and  $^{13}\text{C}$  NMR (75 MHz) NMR (in  $\text{CDCl}_3$ )

The Figures S2-S4 illustrates the partial spectra of COSY, HSQC and NOESY NMR, respectively used for the chemical shift assignments and, consequently, for the designation of the relative stereochemistry of the major and minor **2a** diastereomer. To analyze the complete  $^1\text{H}$ ,  $^{13}\text{C}$ , COSY, HSQC, HMBC, and NOESY NMR spectra obtained for compound **2a**, see pages S133-S138.

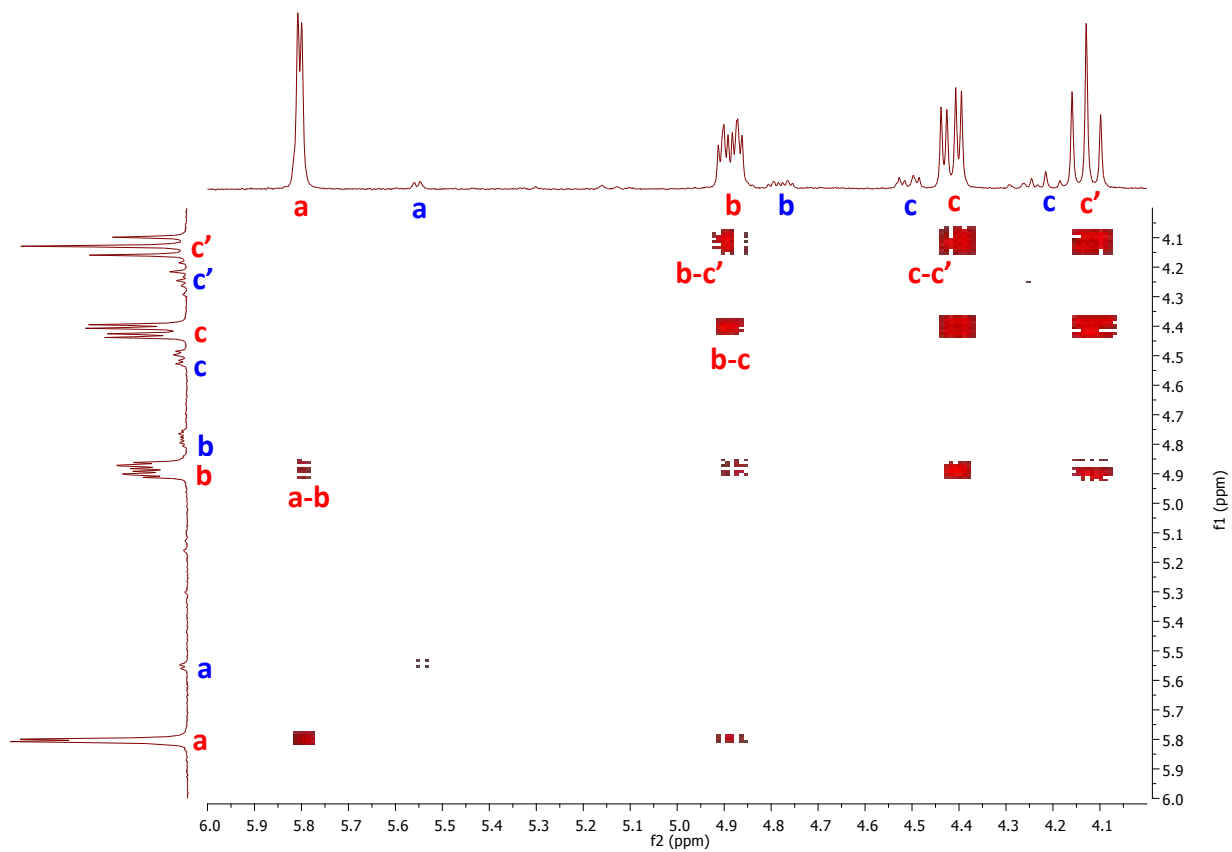

Figure S2. Partial COSY NMR spectra of compound **2a**

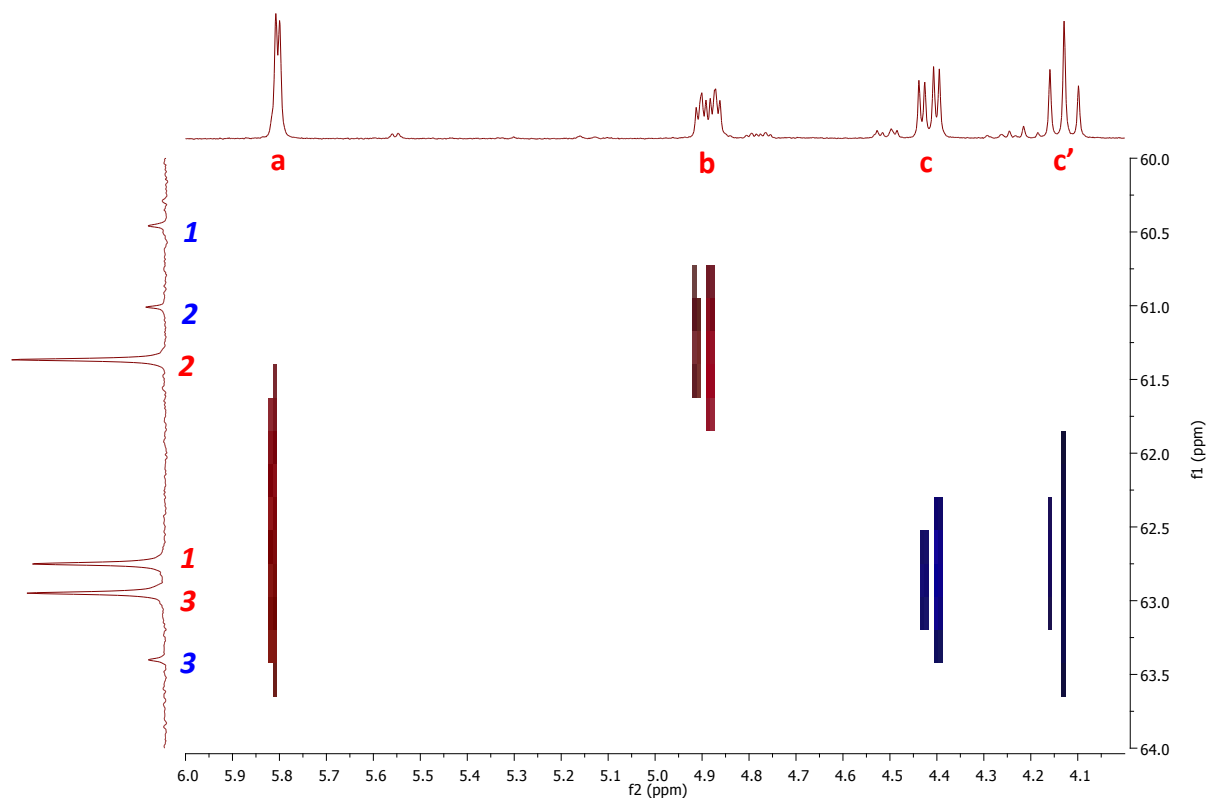

Figure S3. Partial HSQC NMR spectra of compound **2a**

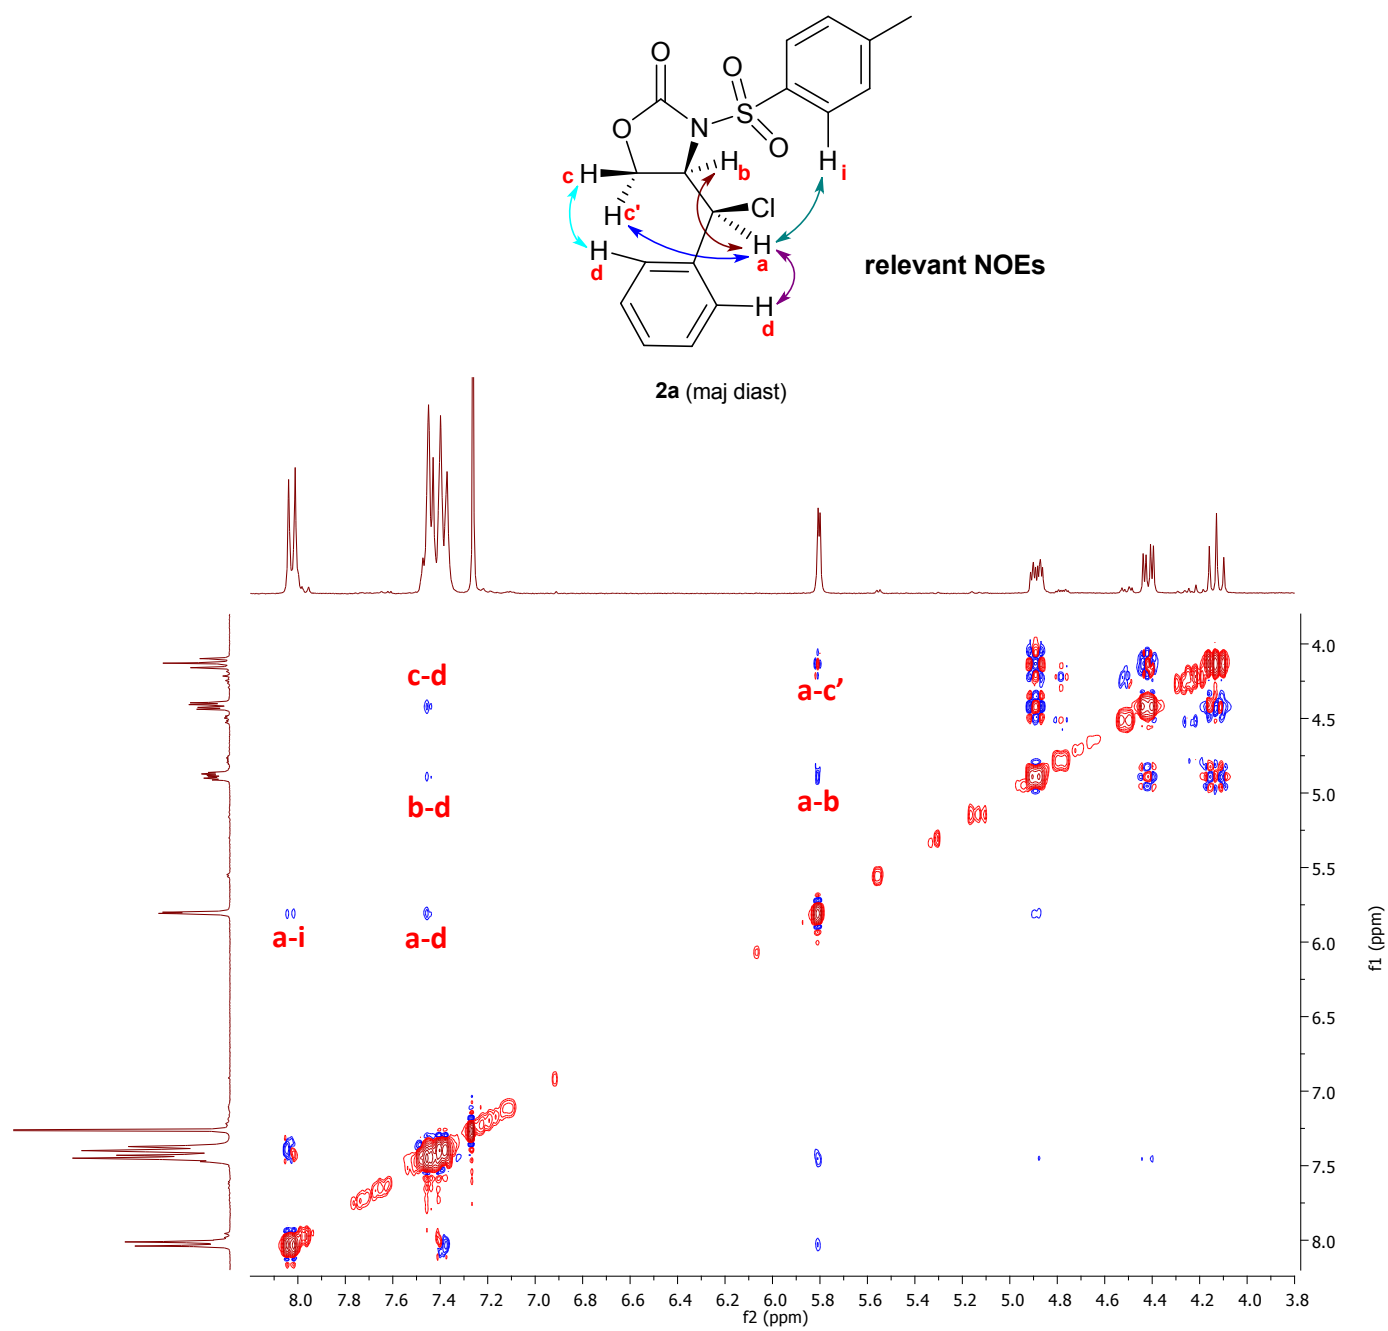

**Figure S4.** Partial NOESY NMR spectra of compound **2a**

## 8. Real-time Reaction Monitoring

The reaction was studied by electrospray ionization mass spectrometry (ESI-MS) coupled with pressurized sample infusion (PSI), using a Waters Acquity Triple Quadrupole Detector (TQD) mass spectrometer. PSI-ESI-MS allowed real-time analysis of reaction by applying 5 psi of N<sub>2</sub> to the reaction vessel which enabled transfer of the reaction mixture to the ESI source via a PEEK tubing at an estimated flow rate of 40 μL/min. The MS parameters used were as follows: capillary voltage 3.0 kV; cone voltage 15 V; extraction voltage 3.0 V; temperature source 90 °C; cone gas flow rate 100 L/h; desolvation gas flow rate, 100 L/h; scan time was set to 5 s. MS/MS experiments were carried out with high purity argon (99.999%) and the collision energy ranged from 5 to 40 V.

For these experiments, the specific substrate and reaction conditions described in Scheme S2 was carried out by adding the reagents under magnetic stirring separately every 2 minutes, allowing the reaction evolution after each addition. Therefore, to a flask containing 10 mL of CH<sub>3</sub>CN, 0.02 mol/L (1.0 mL) of carbamate was added (0 min) and then, after 2 min, a solution of the PdCl<sub>2</sub>(CH<sub>3</sub>CN)<sub>2</sub> catalyst (0.004 mmol in 1.0 mL of CH<sub>3</sub>CN diluted to a final carbamate concentration of 5%). Then, 20 nmol/L (1.0 mL) of tetrabutylammonium acetate were added at 4 min and 30.0 μmol/L (1.0 mL) of CuCl<sub>2</sub> were added at 6 min. Finally, 0.07 mol/L (1.0 mL) of LiCl was added at 8 min. The reaction was kept at 70 °C for a total time of 20 min.

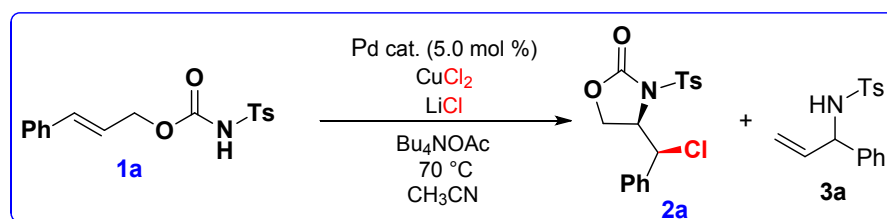

**Scheme S2.** Specific Pd-mediated carbamate cyclization reaction and reaction conditions used for the ESI-PSI-MS experiments

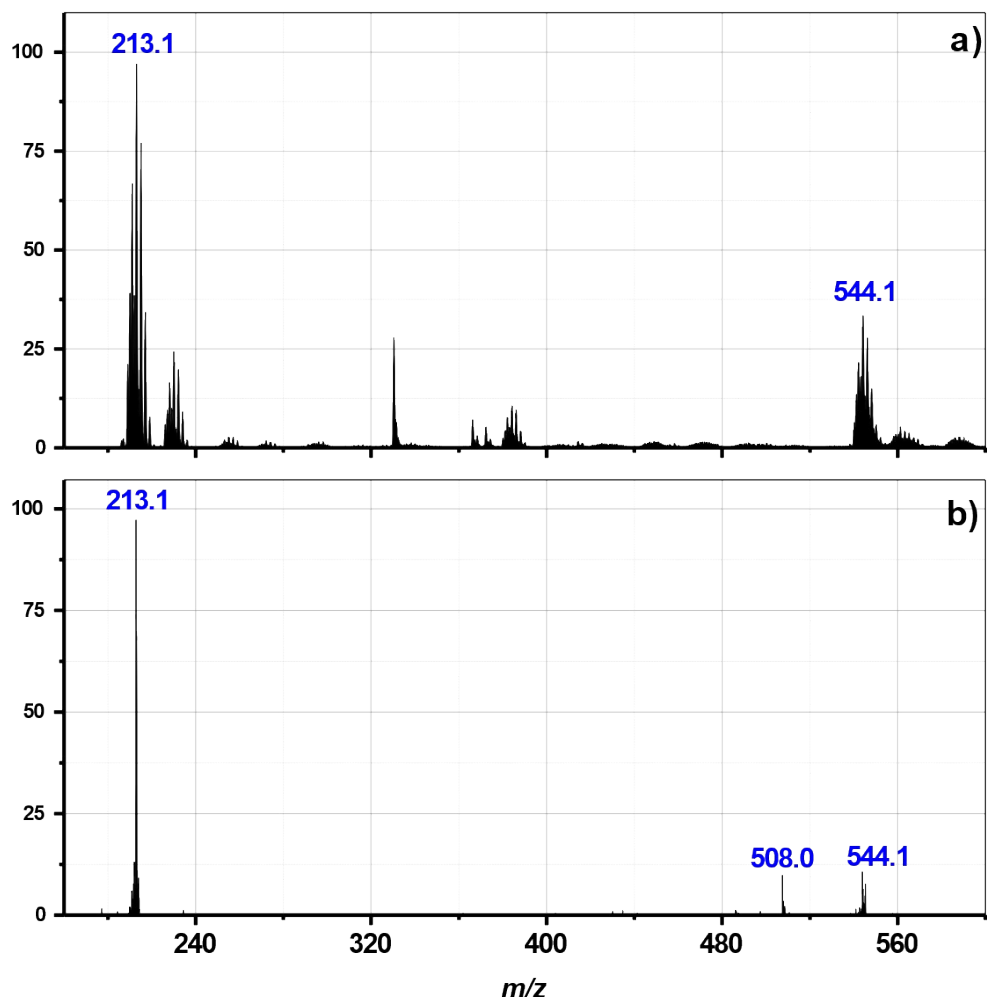

Figure S5. Mass spectra, a) online reaction, b) CID of intermediate  $m/z$  544

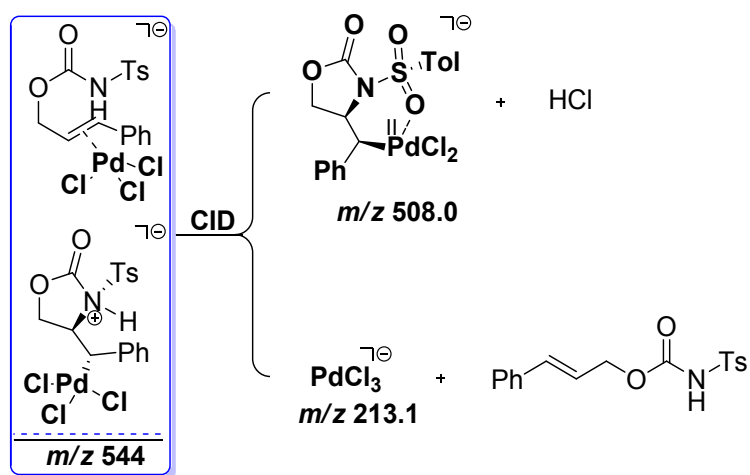

Figure S6. CID of the intermediate (**XIVb**, **XVb**; isomers)

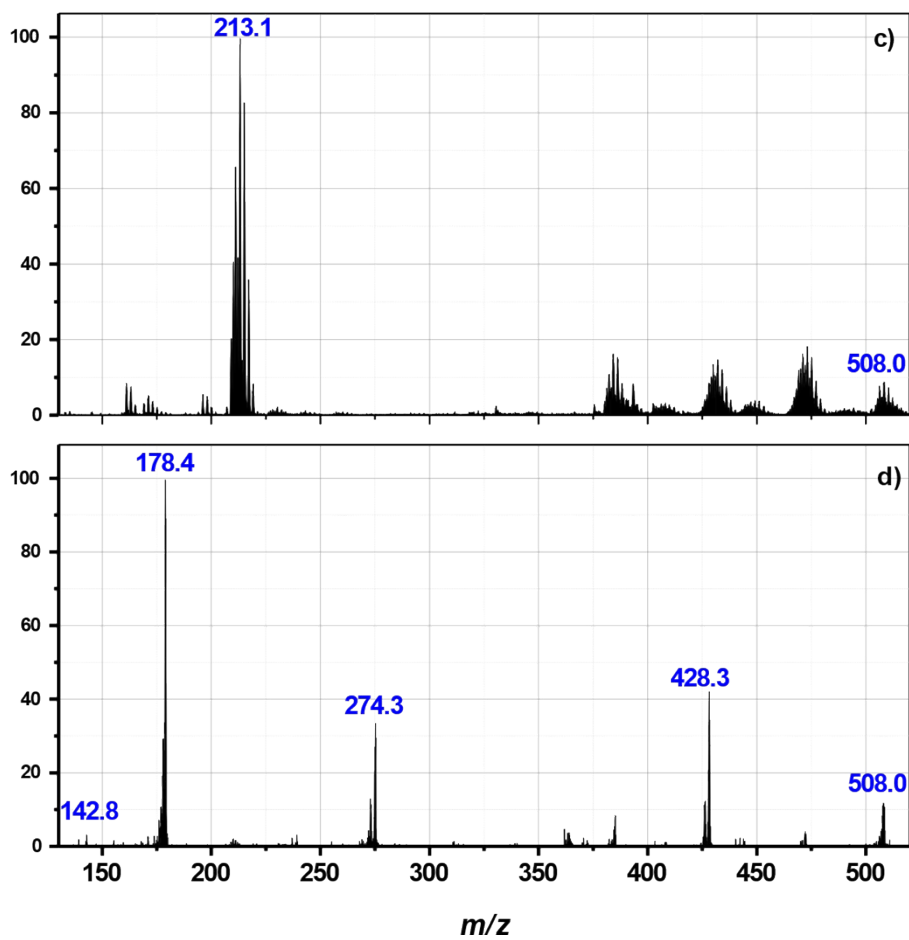

Figure S7. Mass spectra, c) online reaction (3 min), d) CID of intermediate  $m/z$  508

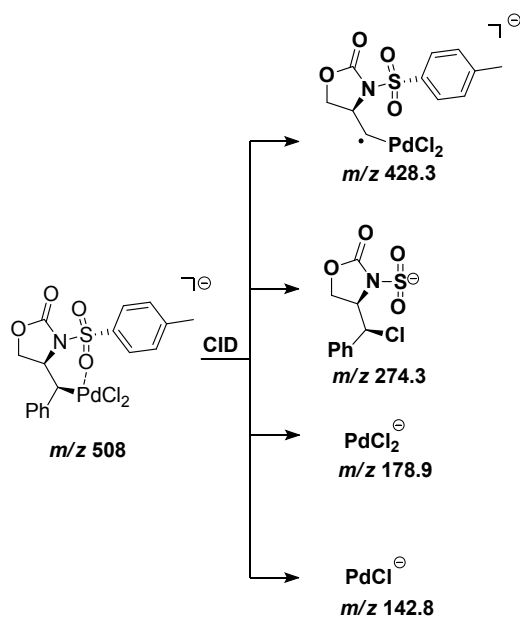

Figure S8. Intermediate CID (XVIa)



---

## 9. Computational Details

All quantum mechanical calculations were carried out using GAUSSIAN-09 (Revision C.01)<sup>27</sup> employing the empirically parameterized hybrid PBE1PBE<sup>28–31</sup> functional for optimizations at the 6-31G(d,p)<sup>32–34</sup> level for the non-metal atoms and Def2-TZVPP<sup>35</sup> level for palladium and copper atoms. The standard Berny algorithm in redundant coordinates and default criteria of convergence were employed. For each optimized ground state, the frequency analysis showed the absence of imaginary frequencies, whereas each transition state showed a single imaginary frequency. All transition structures (TSs) were obtained using the QST2 or QST3 (as implemented in GAUSSIAN) depending on the necessity. All transition states were confirmed following the reaction coordinate in both directions. Solvation obtained with the polarizable continuum model (PCM) on the electronic density (SMD),<sup>36</sup> with CH<sub>3</sub>CN as solvent at 333.15 K were included in all single point calculations. All the energies are relative Gibbs energies in kcal mol<sup>-1</sup>, obtained from single point calculations on the SMD continuum model utilizing M06-2X<sup>37</sup> functional at the 6-311++g(2df,2pd) basis set for the non-metal atoms and Def2-TZVPP level for palladium and copper atoms. We selected combinations of theory levels commonly employed in the literature to study similar mechanisms reactions that has been shown to deliver good results. Thus, we employed theory levels commonly utilized in the literature to study similar reaction mechanisms, for example, analogous to those reported by Poli, Calhorda and,<sup>38,39</sup> Houk and collaborators<sup>40</sup> as well as those compiled by Schoenebeck and collaborators.<sup>41,42</sup> Other works follow the similar methodology as studies of Xue Li and collaborators,<sup>43</sup> Tai-Yuan Lai and collaborators.<sup>44</sup> An extensive analysis of the various possibilities of conformational arrangements and different orientations of reactants that are aligned with the mechanistic proposals presented in this paper were conducted. The 3D structural representations were generated using CYLview software (Legault, C. Y. CYLview version 1.0 BETA, Université de Sherbrooke, 2009 (<http://www.cylview.org>)).

## 10. References

- 1 W. L. F. Armarego and C. L. L. Chai, in *Purification of Laboratory Chemicals*, Elsevier, 2009.
- 2 K. Ando and K. Yamada, *Green Chem.*, 2011, **13**, 1143–1146.
- 3 J. Lu and P. Toy, *Synlett*, 2011, **2011**, 1723–1726.
- 4 D. F. Taber and C. G. Nelson, *J. Org. Chem.*, 2006, **71**, 8973–8974.
- 5 P. R. Blakemore, D. K. H. Ho and W. M. Nap, *Org. Biomol. Chem.*, 2005, **3**, 1365–1368.
- 6 D. C. Deka and M. Paul, *J. Chem. Res.*, 2006, **2006**, 102–103.
- 7 J. Wu, L. Sun and W. Dai, *Tetrahedron*, 2006, **62**, 8360–8372.
- 8 W. Lölsberg, S. Ye and H. Schmalz, *Adv. Synth. Catal.*, 2010, **352**, 2023–2031.
- 9 C. Hollingworth, A. Hazari, M. N. Hopkinson, M. Tredwell, E. Benedetto, M. Huiban, A. D. Gee, J. M. Brown and V. Gouverneur, *Angew. Chemie Int. Ed.*, 2011, **50**, 2613–2617.
- 10 N. Matsunaga, T. Kaku, F. Itoh, T. Tanaka, T. Hara, H. Miki, M. Iwasaki, T. Aono, M. Yamaoka, M. Kusaka and A. Tasaka, *Bioorg. Med. Chem.*, 2004, **12**, 2251–2273.
- 11 A. M. Echavarren and J. K. Stille, *J. Am. Chem. Soc.*, 1988, **110**, 1557–1565.
- 12 A. Bouziane, M. Hérou, B. Carboni, F. Carreaux, B. Demerseman, C. Bruneau and J.-L. Renaud, *Chem. - A Eur. J.*, 2008, **14**, 5630–5637.
- 13 A. B. Charette, C. Molinaro and C. Brochu, *J. Am. Chem. Soc.*, 2001, **123**, 12168–12175.
- 14 C. Morrill, G. L. Beutner and R. H. Grubbs, *J. Org. Chem.*, 2006, **71**, 7813–7825.
- 15 Y. A. Cheng, W. Z. Yu and Y. Y. Yeung, *J. Org. Chem.*, 2016, **81**, 545–552.
- 16 M. Agirre, S. Henrion, I. Rivilla, J. I. Miranda, F. P. Cossío, B. Carboni, J. M. Villalgorido and F. Carreaux, *J. Org. Chem.*, 2018, **83**, 14861–14881.
- 17 J. M. Bauer, W. Frey and R. Peters, *Angew. Chemie - Int. Ed.*, 2014, **53**, 7634–7638.
- 18 S. Giofrè, R. Sala, E. M. Beccalli, L. Lo Presti and G. Broggin, *Helv. Chim. Acta*, 2019, **102**, e1900088.
- 19 A. Zwierzak and S. Pilichowska, *Synthesis (Stuttg.)*, 2002, **1982**, 922–924.
- 20 S. Yamada, K. Ninomiya and T. Shioiri, *Tetrahedron Lett.*, 1973, **14**, 2343–2346.
- 21 D. J. Vyas and M. Oestreich, *Chem. Commun.*, 2010, **46**, 568–570.
- 22 Y. Zhang, M. Anderson, J. L. Weisman, M. Lu, C. J. Choy, V. A. Boyd, J. Price, M. Sigal, J. Clark, M. Connelly, F. Zhu, W. A. Guiguemde, C. Jeffries, L. Yang, A. Lemoff, A. P. Liou, T. R. Webb, J. L. DeRisi and R. K. Guy, *ACS Med. Chem. Lett.*, 2010, **1**, 460–465.
- 23 K. Yamada, Y. Yamamoto, M. Maekawa and K. Tomioka, *J. Org. Chem.*, 2004, **69**, 1531–1534.
- 24 S.-Q. Li, P. Xiong, L. Zhu, X.-Y. Qian and H.-C. Xu, *Eur. J. Org. Chem.*, 2016, **2016**, 3449–3455.
- 25 H. Pan, H. Huang, W. Liu, H. Tian and Y. Shi, *Org. Lett.*, 2016, **18**, 896–899.
- 26 L. A. Gandon, A. G. Russell, T. Güveli, A. E. Brodewolf, B. M. Kariuki, N. Spencer and J. S. Snaith, *J. Org. Chem.*, 2006, **71**, 5198–5207.
- 27 M. J. Frisch, G. W. Trucks, H. B. Schlegel, G. E. Scuseria, M. A. Robb, J. R. Cheeseman, G. Scalmani, V. Barone, B. Mennucci, G. A. Petersson, H. Nakatsuji, M. Caricato, X. Li, H. P. Hratchian, A. F. Izmaylov, J. Bloino, G. Zheng, J. L. Sonnenberg, M. Hada, M. Ehara, K. Toyota, R. Fukuda, J. Hasegawa, M. Ishida, T. Nakajima, Y. Honda, O. Kitao, H. Nakai, T. Vreven, J. A. Montgomery, J. E. Peralta, F. Ogliaro, M. Bearpark, J. J. Heyd, E. Brothers, K. N. Kudin, V. N. Staroverov, R. Kobayashi, J. Normand, K. Raghavachari, A. Rendell, J. C. Burant, S. S. Iyengar, J. Tomasi, M. Cossi, N. Rega, J. M. Millam, M. Klene, J. E. Knox, J. B. Cross, V. Bakken, C. Adamo, J. Jaramillo, R. Gomperts, R. E. Stratmann, O. Yazyev, A. J. Austin, R. Cammi, C. Pomelli, J. W. Ochterski, R. L. Martin, K. Morokuma, V. G. Zakrzewski, G. A. Voth, P. Salvador, J. J. Dannenberg, S. Dapprich, A. D. Daniels, O. Farkas, J. B. Foresman, J. V. Ortiz, J. Cioslowski and D. J. Fox, Gaussian 09 Revision C.01, Wallingford CT.
- 28 J. P. Perdew, K. Burke and M. Ernzerhof, *Phys. Rev. Lett.*, 1996, **77**, 3865–3868.
- 29 J. P. Perdew, K. Burke and M. Ernzerhof, *Phys. Rev. Lett.*, 1997, **78**, 1396–1396.
- 30 C. Adamo and V. Barone, *J. Chem. Phys.*, 1999, **110**, 6158–6170.
- 31 S. E. Wheeler, A. Moran, S. N. Pieniazek and K. N. Houk, *J. Phys. Chem. A*, 2009, **113**, 10376–10384.
- 32 R. Ditchfield, W. J. Hehre and J. A. Pople, *J. Chem. Phys.*, 1971, **54**, 724–728.
- 33 W. J. Hehre, R. Ditchfield and J. A. Pople, *J. Chem. Phys.*, 1972, **56**, 2257–2261.
- 34 M. S. Gordon, *Chem. Phys. Lett.*, 1980, **76**, 163–168.
- 35 D. Andrae, U. Häußermann, M. Dolg, H. Stoll and H. Preuß, *Theor. Chim. Acta*, 1990, **77**, 123–141.
- 36 A. V. Marenich, C. J. Cramer and D. G. Truhlar, *J. Phys. Chem. B*, 2009, **113**, 6378–6396.
- 37 Y. Zhao and D. G. Truhlar, *Acc. Chem. Res.*, 2008, **41**, 157–167.
- 38 F. J. S. Duarte, G. Poli and M. J. Calhorda, *ACS Catal.*, 2016, **6**, 1772–1784.

- 
- 39 M. M. Lorion, F. J. S. Duarte, M. J. Calhorda, J. Oble and G. Poli, *Org. Lett.*, 2016, **18**, 1020–1023.
- 40 Y.-F. Yang, G.-J. Cheng, P. Liu, D. Leow, T.-Y. Sun, P. Chen, X. Zhang, J.-Q. Yu, Y.-D. Wu and K. N. Houk, *J. Am. Chem. Soc.*, 2014, **136**, 344–355.
- 41 T. Sperger, I. A. Sanhueza, I. Kalvet and F. Schoenebeck, *Chem. Rev.*, 2015, **115**, 9532–9586.
- 42 T. Sperger, H. C. Fisher and F. Schoenebeck, *Wiley Interdiscip. Rev. Comput. Mol. Sci.*, 2016, **6**, 226–242.
- 43 X. Li, D. Wei and Z. Li, *ACS Omega*, 2017, **2**, 7029–7038.
- 44 T.-Y. Lai, C.-Y. Yang, H.-J. Lin, C.-Y. Yang and W.-P. Hu, *J. Chem. Phys.*, 2011, **134**, 244110.

## 11. Cartesian Coordinates (Å) and Energies (hartree) of all the Structures.

### Li<sub>2</sub>PdCl<sub>4</sub>:

The Number of Imaginary Frequencies = 0  
PBE1PBE/6-31G(d,p)/Def2-TZVPP, G = -1983.376454  
Thermal correction to Gibbs Free Energy = -0.030004  
E(M062X/6-31G(d,p)/Def2-TZVPP,CH<sub>3</sub>CN) = -1984.03147834

|    |              |              |              |
|----|--------------|--------------|--------------|
| 46 | 0.000001000  | 0.000007000  | -0.000016000 |
| 17 | -1.627941000 | -1.686821000 | -0.000259000 |
| 17 | 1.627912000  | -1.686846000 | 0.000230000  |
| 17 | 1.628032000  | 1.686798000  | 0.000264000  |
| 17 | -1.627999000 | 1.686819000  | -0.000293000 |
| 3  | -3.039438000 | 0.000118000  | 0.001872000  |
| 3  | 3.039402000  | 0.000061000  | -0.001303000 |

### LiCl:

The Number of Imaginary Frequencies = 0  
PBE1PBE/6-31G(d,p)/Def2-TZVPP, G = -467.620671  
Thermal correction to Gibbs Free Energy = -0.019286  
E(M062X/6-31G(d,p)/Def2-TZVPP,CH<sub>3</sub>CN) = -467.832346279

|    |             |             |              |
|----|-------------|-------------|--------------|
| 3  | 0.000000000 | 0.000000000 | -1.747009000 |
| 17 | 0.000000000 | 0.000000000 | 0.308296000  |

### 2LiCl:

The Number of Imaginary Frequencies = 0  
PBE1PBE/6-31G(d,p)/Def2-TZVPP, G = -935.310031  
Thermal correction to Gibbs Free Energy = -0.023554  
E(M062X/6-31G(d,p)/Def2-TZVPP,CH<sub>3</sub>CN) = -935.703763390

|    |              |              |              |
|----|--------------|--------------|--------------|
| 17 | 0.000000000  | 1.795396000  | -0.000039000 |
| 17 | 0.000000000  | -1.795396000 | -0.000039000 |
| 3  | -1.321027000 | 0.003145000  | 0.000219000  |
| 3  | 1.321027000  | -0.003145000 | 0.000219000  |

### AcOH:

The Number of Imaginary Frequencies = 0  
PBE1PBE/6-31G(d,p)/Def2-TZVPP, G = -228.802122  
Thermal correction to Gibbs Free Energy = 0.036477  
E(M062X/6-31G(d,p)/Def2-TZVPP,CH<sub>3</sub>CN) = -229.087660858

|   |              |              |              |
|---|--------------|--------------|--------------|
| 6 | 1.387035000  | -0.154814000 | 0.000003000  |
| 1 | 1.609907000  | -1.221324000 | 0.000015000  |
| 1 | 1.830295000  | 0.318112000  | 0.879786000  |
| 1 | 1.830316000  | 0.318096000  | -0.879778000 |
| 6 | -0.090396000 | 0.115779000  | -0.000019000 |
| 8 | -0.596289000 | 1.212100000  | 0.000005000  |
| 8 | -0.816979000 | -1.017697000 | 0.000002000  |
| 1 | -1.744212000 | -0.735892000 | 0.000011000  |

### 2CuCl<sub>2</sub>:

The Number of Imaginary Frequencies = 0  
PBE1PBE/6-31G(d,p)/Def2-TZVPP, G = -5120.841370  
Thermal correction to Gibbs Free Energy = -0.033118  
E(M062X/6-31G(d,p)/Def2-TZVPP,CH<sub>3</sub>CN) = -5121.91060845

|    |              |              |              |
|----|--------------|--------------|--------------|
| 29 | 2.246639000  | 0.000105000  | 0.000500000  |
| 29 | -0.666470000 | 0.000021000  | -0.000430000 |
| 17 | 0.879298000  | 1.707326000  | -0.000192000 |
| 17 | 0.879606000  | -1.707296000 | -0.000668000 |
| 17 | -2.227387000 | 1.467304000  | 0.000093000  |
| 17 | -2.227101000 | -1.467547000 | 0.000647000  |

### 2CuCl:

The Number of Imaginary Frequencies = 0  
PBE1PBE/6-31G(d,p)/Def2-TZVPP, G = -0.029806  
Thermal correction to Gibbs Free Energy = -4200.796992  
E(M062X/6-31G(d,p)/Def2-TZVPP,CH<sub>3</sub>CN) = -4201.55905977

|    |              |              |              |
|----|--------------|--------------|--------------|
| 29 | 0.000001000  | -1.210774000 | -0.000001000 |
| 29 | -0.000001000 | 1.210780000  | -0.000001000 |
| 17 | -1.918802000 | -0.000007000 | 0.000001000  |
| 17 | 1.918802000  | -0.000004000 | 0.000001000  |

### TMA-AcO:

The Number of Imaginary Frequencies = 0  
PBE1PBE/6-31G(d,p)/Def2-TZVPP, G = -442.162843  
Thermal correction to Gibbs Free Energy = 0.176230  
E(M062X/6-31G(d,p)/Def2-TZVPP,CH<sub>3</sub>CN) = -442.829264690

|   |              |              |              |
|---|--------------|--------------|--------------|
| 6 | 2.185551000  | 0.047342000  | 0.000596000  |
| 6 | 3.698271000  | -0.165367000 | 0.000451000  |
| 1 | 3.984354000  | -0.769857000 | 0.866917000  |
| 1 | 3.987642000  | -0.733699000 | -0.889322000 |
| 1 | 4.233693000  | 0.785426000  | 0.019527000  |
| 8 | 1.761331000  | 1.225675000  | -0.000210000 |
| 8 | 1.480140000  | -1.007816000 | -0.000328000 |
| 7 | -1.723534000 | -0.005007000 | 0.000011000  |
| 6 | -1.221778000 | -0.727977000 | -1.211284000 |
| 1 | -0.129614000 | -0.828027000 | -1.087410000 |
| 1 | -1.694975000 | -1.711956000 | -1.241879000 |
| 1 | -1.497439000 | -0.151461000 | -2.096129000 |
| 6 | -1.220618000 | -0.723150000 | 1.213677000  |
| 1 | -0.128697000 | -0.824325000 | 1.088956000  |
| 1 | -1.494697000 | -0.142690000 | 2.096433000  |
| 1 | -1.694343000 | -1.706710000 | 1.249100000  |
| 6 | -1.170525000 | 1.386958000  | -0.003020000 |
| 1 | -1.541152000 | 1.897668000  | 0.888723000  |
| 1 | -0.054977000 | 1.333602000  | -0.002778000 |
| 1 | -1.541267000 | 1.893824000  | -0.896903000 |
| 6 | -3.205318000 | 0.034549000  | 0.000665000  |
| 1 | -3.593442000 | -0.985769000 | 0.002693000  |
| 1 | -3.547371000 | 0.562605000  | 0.892593000  |
| 1 | -3.548239000 | 0.559423000  | -0.892804000 |

### TMA-Cl:

The Number of Imaginary Frequencies = 0  
PBE1PBE/6-31G(d,p)/Def2-TZVPP, G = -674.024242  
Thermal correction to Gibbs Free Energy = 0.133188  
E(M062X/6-31G(d,p)/Def2-TZVPP,CH<sub>3</sub>CN) = -674.590282473

|    |              |              |              |
|----|--------------|--------------|--------------|
| 7  | -1.006227000 | 0.000021000  | -0.000036000 |
| 6  | -0.487550000 | -0.870639000 | -1.103491000 |
| 1  | -0.857608000 | -1.885022000 | -0.942894000 |
| 1  | -0.858903000 | -0.479760000 | -2.052738000 |
| 1  | 0.613911000  | -0.827664000 | -1.049926000 |
| 6  | -2.488619000 | -0.000289000 | 0.000366000  |
| 1  | -2.846144000 | -1.020667000 | 0.149768000  |
| 1  | -2.846495000 | 0.638998000  | 0.809400000  |
| 1  | -2.846927000 | 0.380380000  | -0.957768000 |
| 6  | -0.486922000 | -0.520325000 | 1.305515000  |
| 1  | -0.857622000 | 0.125079000  | 2.104099000  |
| 1  | -0.857592000 | -1.538157000 | 1.440963000  |
| 1  | 0.614555000  | -0.494590000 | 1.240809000  |
| 6  | -0.487927000 | 1.391186000  | -0.202325000 |
| 1  | -0.858367000 | 1.759790000  | -1.160813000 |
| 1  | -0.859375000 | 2.017328000  | 0.611147000  |
| 1  | 0.613578000  | 1.323763000  | -0.192058000 |
| 17 | 2.505687000  | 0.000046000  | -0.000008000 |

**1a:**

The Number of Imaginary Frequencies = 0

PBE1PBE/6-31G(d,p)/Def2-TZVPP, G = -1410.284937

Thermal correction to Gibbs Free Energy = 0.260272

E(M062X/6-31G(d,p)/Def2-TZVPP,CH<sub>3</sub>CN) = -1411.81643219

|    |              |              |              |
|----|--------------|--------------|--------------|
| 6  | -0.583333000 | 1.990307000  | 0.192099000  |
| 8  | 0.249045000  | 2.786298000  | -0.511693000 |
| 6  | 1.196222000  | 2.245469000  | -1.442593000 |
| 1  | 2.865433000  | 2.262390000  | -0.015104000 |
| 1  | 0.705843000  | 1.523547000  | -2.107429000 |
| 1  | 1.480155000  | 3.115833000  | -2.042983000 |
| 1  | 2.388818000  | -0.115157000 | -1.900408000 |
| 16 | -1.095438000 | -0.511063000 | 1.118373000  |
| 8  | -1.205503000 | -0.036794000 | 2.483535000  |
| 8  | -0.367207000 | -1.729873000 | 0.791151000  |
| 6  | -2.710650000 | -0.583945000 | 0.401321000  |
| 6  | -2.967928000 | -1.547377000 | -0.569704000 |
| 6  | -3.702640000 | 0.286316000  | 0.846644000  |
| 6  | -4.244108000 | -1.627353000 | -1.112176000 |
| 1  | -2.181247000 | -2.230571000 | -0.872542000 |
| 6  | -4.969864000 | 0.190168000  | 0.287760000  |
| 1  | -3.470392000 | 1.023724000  | 1.606035000  |
| 6  | -5.259598000 | -0.759753000 | -0.697818000 |
| 1  | -4.459044000 | -2.381551000 | -1.864540000 |
| 1  | -5.752426000 | 0.863689000  | 0.626823000  |
| 8  | -1.531723000 | 2.455219000  | 0.768528000  |
| 1  | 0.660399000  | 0.328929000  | -0.071163000 |
| 6  | 4.129245000  | -0.167599000 | -0.614189000 |
| 6  | 4.358472000  | -1.521718000 | -0.891213000 |
| 6  | 5.074942000  | 0.525896000  | 0.154916000  |
| 6  | 5.485598000  | -2.170677000 | -0.401360000 |
| 1  | 3.635161000  | -2.071297000 | -1.488496000 |
| 6  | 6.200864000  | -0.121646000 | 0.643468000  |
| 1  | 4.936523000  | 1.583373000  | 0.359805000  |
| 6  | 6.409990000  | -1.472586000 | 0.369451000  |
| 1  | 5.641401000  | -3.222501000 | -0.621654000 |
| 1  | 6.924077000  | 0.430821000  | 1.236052000  |
| 1  | 7.293330000  | -1.975595000 | 0.751388000  |
| 6  | -6.629126000 | -0.831265000 | -1.309690000 |
| 1  | -6.830341000 | -1.820308000 | -1.729248000 |
| 1  | -6.728820000 | -0.102036000 | -2.122343000 |
| 1  | -7.406781000 | -0.605906000 | -0.574655000 |

**2a – maj diast:**

The Number of Imaginary Frequencies = 0

PBE1PBE/6-31G(d,p)/Def2-TZVPP, G = -1869.754087

Thermal correction to Gibbs Free Energy = 0.254240

E(M062X/6-31G(d,p)/Def2-TZVPP,CH<sub>3</sub>CN) = -1871.44641308

|   |              |              |              |
|---|--------------|--------------|--------------|
| 7 | -2.332305000 | -0.991961000 | 1.861791000  |
| 6 | -1.202916000 | -0.244625000 | 2.189108000  |
| 8 | -0.963456000 | 0.294354000  | 3.232823000  |
| 8 | -0.376941000 | -0.252536000 | 1.123531000  |
| 6 | -2.340518000 | -1.419437000 | 0.476140000  |
| 6 | -3.397096000 | -0.712232000 | -0.394160000 |
| 1 | -4.363389000 | -0.841689000 | 0.097742000  |
| 1 | -2.554637000 | -2.490284000 | 0.409845000  |
| 6 | -3.449510000 | -1.329713000 | -1.771483000 |
| 6 | -4.150157000 | -2.533346000 | -1.906677000 |
| 6 | -2.794090000 | -0.797718000 | -2.881805000 |
| 6 | -4.186524000 | -3.196251000 | -3.128046000 |
| 1 | -4.677159000 | -2.944928000 | -1.048337000 |
| 6 | -2.833180000 | -1.462498000 | -4.104925000 |
| 1 | -2.275967000 | 0.152507000  | -2.795966000 |

|    |              |              |              |
|----|--------------|--------------|--------------|
| 6  | -3.525173000 | -2.662510000 | -4.231458000 |
| 1  | -4.740504000 | -4.125810000 | -3.220052000 |
| 1  | -2.325057000 | -1.033725000 | -4.963696000 |
| 1  | -3.557780000 | -3.175613000 | -5.187967000 |
| 16 | -3.603835000 | -1.306156000 | 2.947843000  |
| 8  | -4.077143000 | -0.051778000 | 3.493552000  |
| 8  | -4.473083000 | -2.183405000 | 2.169692000  |
| 6  | -2.845113000 | -2.249473000 | 4.236613000  |
| 6  | -2.237923000 | -1.591665000 | 5.303990000  |
| 6  | -2.894305000 | -3.639830000 | 4.168552000  |
| 6  | -1.659995000 | -2.354063000 | 6.310408000  |
| 1  | -2.210743000 | -0.508478000 | 5.327144000  |
| 6  | -2.312995000 | -4.380440000 | 5.188858000  |
| 1  | -3.396160000 | -4.122546000 | 3.336444000  |
| 6  | -1.688433000 | -3.752025000 | 6.271634000  |
| 1  | -1.177250000 | -1.852272000 | 7.144562000  |
| 1  | -2.348607000 | -5.465857000 | 5.148052000  |
| 17 | -3.102735000 | 1.058191000  | -0.414721000 |
| 6  | -1.089451000 | -4.561417000 | 7.385358000  |
| 1  | -1.829236000 | -4.739967000 | 8.174610000  |
| 1  | -0.746726000 | -5.537484000 | 7.031879000  |
| 1  | -0.241877000 | -4.045099000 | 7.843721000  |

**2a – min diast:**

The Number of Imaginary Frequencies = 0

PBE1PBE/6-31G(d,p)/Def2-TZVPP, G = -1869.751052

Thermal correction to Gibbs Free Energy = 0.254821

E(M062X/6-31G(d,p)/Def2-TZVPP,CH<sub>3</sub>CN) = -1871.44427590

|    |              |              |             |
|----|--------------|--------------|-------------|
| 6  | 4.417171000  | -0.082825000 | 2.521484000 |
| 7  | 2.482720000  | 1.077019000  | 2.854207000 |
| 6  | 3.453566000  | 0.326720000  | 3.640244000 |
| 16 | 1.915985000  | 2.632314000  | 3.313045000 |
| 8  | 2.475059000  | 2.828357000  | 4.641860000 |
| 6  | 2.847277000  | -0.916819000 | 4.312422000 |
| 8  | 2.227144000  | 3.529594000  | 2.216827000 |
| 1  | 3.917748000  | 0.972598000  | 4.387209000 |
| 1  | 4.868869000  | -1.064059000 | 2.671831000 |
| 1  | 5.201539000  | 0.666817000  | 2.373132000 |
| 6  | 0.160732000  | 2.467903000  | 3.433448000 |
| 6  | -0.600857000 | 2.398048000  | 2.268034000 |
| 6  | -0.428055000 | 2.477257000  | 4.693269000 |
| 6  | -1.981102000 | 2.318886000  | 2.384280000 |
| 1  | -0.112865000 | 2.392679000  | 1.299098000 |
| 6  | -1.812978000 | 2.405958000  | 4.782869000 |
| 1  | 0.195258000  | 2.549111000  | 5.577764000 |
| 6  | -2.607529000 | 2.320617000  | 3.636496000 |
| 1  | -2.586893000 | 2.261606000  | 1.483818000 |
| 1  | -2.285010000 | 2.419863000  | 5.761528000 |
| 6  | 3.881239000  | -1.688895000 | 5.087202000 |
| 6  | 4.534230000  | -1.115538000 | 6.182819000 |
| 6  | 4.227647000  | -2.980944000 | 4.688374000 |
| 6  | 5.520018000  | -1.822741000 | 6.859944000 |
| 1  | 4.250884000  | -0.121796000 | 6.519864000 |
| 6  | 5.216960000  | -3.688851000 | 5.366464000 |
| 1  | 3.715266000  | -3.438139000 | 3.845045000 |
| 6  | 5.865653000  | -3.109891000 | 6.451863000 |
| 1  | 6.018306000  | -1.370103000 | 7.712043000 |
| 1  | 5.475121000  | -4.694367000 | 5.047940000 |
| 1  | 6.635327000  | -3.661072000 | 6.983894000 |
| 1  | 2.411930000  | -1.553243000 | 5.362500000 |
| 6  | 2.543111000  | 0.700653000  | 1.505911000 |
| 8  | 1.797502000  | 1.015268000  | 0.623084000 |
| 8  | 3.595740000  | -0.137384000 | 1.351499000 |

|    |              |              |             |
|----|--------------|--------------|-------------|
| 17 | 1.464522000  | -0.447698000 | 5.367025000 |
| 6  | -4.101544000 | 2.212435000  | 3.741145000 |
| 1  | -4.598951000 | 2.778073000  | 2.948149000 |
| 1  | -4.421773000 | 1.168313000  | 3.645441000 |
| 1  | -4.464100000 | 2.581067000  | 4.703995000 |

**3a:**

The Number of Imaginary Frequencies = 0  
PBE1PBE/6-31G(d,p)/Def2-TZVPP, G = -1221.923232  
Thermal correction to Gibbs Free Energy = 0.242161  
E(M062X/6-31G(d,p)/Def2-TZVPP,CH<sub>3</sub>CN) = -1223.23172029

|    |              |              |              |
|----|--------------|--------------|--------------|
| 6  | 0.435780000  | 0.059100000  | -0.962344000 |
| 6  | -0.218888000 | 1.075033000  | -0.063479000 |
| 7  | -1.683871000 | 1.073432000  | -0.202960000 |
| 6  | 1.067920000  | -1.024226000 | -0.520091000 |
| 1  | 0.348469000  | 0.245454000  | -2.033569000 |
| 1  | 1.151076000  | -1.234322000 | 0.543063000  |
| 1  | 1.503591000  | -1.747141000 | -1.203022000 |
| 1  | -0.025359000 | 0.788746000  | 0.976905000  |
| 16 | -2.536246000 | -0.202069000 | 0.482548000  |
| 8  | -1.754533000 | -0.636542000 | 1.634945000  |
| 8  | -2.956702000 | -1.141436000 | -0.552236000 |
| 6  | -3.999026000 | 0.622166000  | 1.065892000  |
| 6  | -5.212369000 | 0.388281000  | 0.432173000  |
| 6  | -3.915160000 | 1.467895000  | 2.171401000  |
| 6  | -6.356344000 | 1.024224000  | 0.906881000  |
| 1  | -5.251324000 | -0.293126000 | -0.411431000 |
| 6  | -5.064264000 | 2.092639000  | 2.630022000  |
| 1  | -2.961496000 | 1.619134000  | 2.667112000  |
| 6  | -6.301329000 | 1.884341000  | 2.004441000  |
| 1  | -7.309548000 | 0.842658000  | 0.417502000  |
| 1  | -5.006812000 | 2.750073000  | 3.493891000  |
| 6  | -7.533760000 | 2.577411000  | 2.510924000  |
| 1  | -8.432112000 | 2.221146000  | 2.001245000  |
| 1  | -7.467524000 | 3.659999000  | 2.354994000  |
| 1  | -7.666225000 | 2.414168000  | 3.585296000  |
| 6  | 0.301900000  | 2.489188000  | -0.285066000 |
| 6  | -0.504781000 | 3.605009000  | -0.050341000 |
| 6  | 1.626065000  | 2.688196000  | -0.684096000 |
| 6  | 0.001850000  | 4.890814000  | -0.214596000 |
| 1  | -1.533479000 | 3.456100000  | 0.263049000  |
| 6  | 2.132716000  | 3.974054000  | -0.845448000 |
| 1  | 2.263046000  | 1.826975000  | -0.865737000 |
| 6  | 1.321566000  | 5.080876000  | -0.613786000 |
| 1  | -0.639565000 | 5.748066000  | -0.029712000 |
| 1  | 3.164660000  | 4.109811000  | -1.156603000 |
| 1  | 1.715149000  | 6.084808000  | -0.744067000 |
| 1  | -1.994589000 | 1.209331000  | -1.161557000 |

**Int-A:**

The Number of Imaginary Frequencies = 0  
PBE1PBE/6-31G(d,p)/Def2-TZVPP, G = -2925.999942  
Thermal correction to Gibbs Free Energy = 0.244419  
E(M062X/6-31G(d,p)/Def2-TZVPP,CH<sub>3</sub>CN) = -2927.99514400

|   |              |              |              |
|---|--------------|--------------|--------------|
| 6 | 17.050485000 | 0.158729000  | -3.307562000 |
| 6 | 15.898249000 | -0.029093000 | -2.535342000 |
| 7 | 14.916129000 | -1.577920000 | -5.258359000 |
| 6 | 15.420608000 | -0.522509000 | -5.997312000 |
| 8 | 16.665350000 | -0.101119000 | -5.685198000 |
| 6 | 17.390607000 | -0.612768000 | -4.563019000 |
| 1 | 17.544117000 | 1.126268000  | -3.243408000 |
| 1 | 17.256817000 | -1.688551000 | -4.444218000 |
| 1 | 18.439075000 | -0.443341000 | -4.815118000 |

|    |              |              |               |
|----|--------------|--------------|---------------|
| 1  | 15.296820000 | -0.915033000 | -2.719905000  |
| 16 | 13.304635000 | -2.111950000 | -5.391426000  |
| 8  | 12.432968000 | -0.955880000 | -5.362297000  |
| 8  | 13.253026000 | -3.144208000 | -4.366736000  |
| 6  | 13.207106000 | -2.874703000 | -6.983504000  |
| 6  | 13.392611000 | -4.251595000 | -7.075892000  |
| 6  | 12.916629000 | -2.100002000 | -8.104485000  |
| 6  | 13.294657000 | -4.857918000 | -8.322036000  |
| 1  | 13.589265000 | -4.830721000 | -6.179445000  |
| 6  | 12.826128000 | -2.727934000 | -9.339684000  |
| 1  | 12.776501000 | -1.030524000 | -7.998723000  |
| 6  | 13.016333000 | -4.108371000 | -9.469560000  |
| 1  | 13.428895000 | -5.933273000 | -8.404468000  |
| 1  | 12.598553000 | -2.134738000 | -10.221523000 |
| 8  | 14.815072000 | 0.010009000  | -6.891205000  |
| 1  | 15.448880000 | -2.121155000 | -4.586293000  |
| 6  | 15.252376000 | 0.947306000  | -1.656523000  |
| 6  | 14.165743000 | 0.504329000  | -0.885402000  |
| 6  | 15.628676000 | 2.297371000  | -1.587850000  |
| 6  | 13.484568000 | 1.381460000  | -0.052206000  |
| 1  | 13.861002000 | -0.537224000 | -0.947929000  |
| 6  | 14.941259000 | 3.172748000  | -0.760079000  |
| 1  | 16.451878000 | 2.666717000  | -2.189762000  |
| 6  | 13.872637000 | 2.717536000  | 0.012472000   |
| 1  | 12.646310000 | 1.025302000  | 0.538523000   |
| 1  | 15.234336000 | 4.217464000  | -0.720604000  |
| 1  | 13.336617000 | 3.408515000  | 0.656668000   |
| 46 | 17.672562000 | -0.952867000 | -1.580805000  |
| 17 | 16.806198000 | -2.937047000 | -2.323977000  |
| 17 | 18.708889000 | 1.061601000  | -0.820238000  |
| 6  | 12.941477000 | -4.766021000 | -10.817636000 |
| 1  | 12.699740000 | -5.828720000 | -10.732893000 |
| 1  | 13.902052000 | -4.687394000 | -11.340464000 |
| 1  | 12.187032000 | -4.292023000 | -11.451766000 |
| 17 | 18.844806000 | -2.199210000 | 0.086574000   |
| 3  | 19.552484000 | -0.237893000 | 0.760506000   |

**Int-B:**

The Number of Imaginary Frequencies = 0  
PBE1PBE/6-31G(d,p)/Def2-TZVPP, G = -2925.980330  
Thermal correction to Gibbs Free Energy = 0.247200  
E(M062X/6-31G(d,p)/Def2-TZVPP,CH<sub>3</sub>CN) = -2927.97983676

|    |              |              |              |
|----|--------------|--------------|--------------|
| 6  | -0.969929000 | -1.951202000 | 1.085448000  |
| 1  | -0.197156000 | -2.207072000 | 1.814291000  |
| 1  | -0.927600000 | -2.613945000 | 0.219899000  |
| 46 | -3.715462000 | -2.076913000 | -0.928021000 |
| 7  | -2.718357000 | -0.454803000 | 1.641815000  |
| 6  | -1.619895000 | 0.247377000  | 0.927845000  |
| 8  | -1.639998000 | 1.415525000  | 0.701231000  |
| 8  | -0.685191000 | -0.622128000 | 0.623852000  |
| 6  | -2.381014000 | -1.914270000 | 1.705941000  |
| 6  | -3.467985000 | -2.715042000 | 0.999874000  |
| 1  | -4.423369000 | -2.415356000 | 1.446073000  |
| 1  | -2.337199000 | -2.198290000 | 2.765345000  |
| 6  | -3.352363000 | -4.195943000 | 1.147846000  |
| 6  | -4.467085000 | -4.980167000 | 0.808852000  |
| 6  | -2.218990000 | -4.853529000 | 1.640177000  |
| 6  | -4.443574000 | -6.360279000 | 0.942086000  |
| 1  | -5.357113000 | -4.485650000 | 0.427010000  |
| 6  | -2.194352000 | -6.239636000 | 1.778464000  |
| 1  | -1.334933000 | -4.295121000 | 1.936153000  |
| 6  | -3.302853000 | -7.000081000 | 1.427063000  |
| 1  | -5.320139000 | -6.941444000 | 0.669838000  |

|    |              |              |              |
|----|--------------|--------------|--------------|
| 1  | -1.301271000 | -6.723168000 | 2.164394000  |
| 1  | -3.282473000 | -8.080718000 | 1.532873000  |
| 16 | -3.017291000 | 0.279927000  | 3.327658000  |
| 8  | -3.901772000 | -0.700921000 | 3.920199000  |
| 8  | -1.680322000 | 0.536496000  | 3.823244000  |
| 6  | -3.874086000 | 1.756442000  | 2.964757000  |
| 6  | -5.258377000 | 1.700004000  | 2.791426000  |
| 6  | -3.159866000 | 2.951728000  | 2.878431000  |
| 6  | -5.932812000 | 2.880310000  | 2.520976000  |
| 1  | -5.787320000 | 0.756484000  | 2.868666000  |
| 6  | -3.862836000 | 4.116510000  | 2.613825000  |
| 1  | -2.084778000 | 2.958700000  | 3.015696000  |
| 6  | -5.250175000 | 4.099179000  | 2.423126000  |
| 1  | -7.009282000 | 2.855178000  | 2.380042000  |
| 1  | -3.324807000 | 5.057604000  | 2.547185000  |
| 17 | -2.112327000 | -3.655135000 | -1.761322000 |
| 1  | -3.639532000 | -0.316346000 | 1.054729000  |
| 17 | -5.111621000 | -0.402968000 | -0.053576000 |
| 6  | -5.990827000 | 5.359852000  | 2.090899000  |
| 1  | -5.473625000 | 6.243130000  | 2.473633000  |
| 1  | -6.075373000 | 5.471731000  | 1.003537000  |
| 1  | -7.005393000 | 5.347174000  | 2.497495000  |
| 17 | -4.204947000 | -1.246892000 | -3.239700000 |
| 3  | -2.729490000 | -2.754974000 | -3.675675000 |

### TS<sub>AB</sub>:

The Number of Imaginary Frequencies = 1 (-339.2475 cm<sup>-1</sup>)

PBE1PBE/6-31G(d,p)/Def2-TZVPP, G = -2925.942615

Thermal correction to Gibbs Free Energy = 0.244406

E(M062X/6-31G(d,p)/Def2-TZVPP,CH<sub>3</sub>CN) = -2927.93799202

|    |              |              |               |
|----|--------------|--------------|---------------|
| 6  | 16.317373000 | 0.249255000  | -3.950437000  |
| 6  | 15.916064000 | -0.303900000 | -2.694361000  |
| 7  | 15.446698000 | -0.867075000 | -5.441869000  |
| 6  | 16.205872000 | -0.312864000 | -6.528827000  |
| 8  | 17.386476000 | 0.128435000  | -6.091118000  |
| 6  | 17.592809000 | -0.053351000 | -4.683538000  |
| 1  | 15.913503000 | 1.235549000  | -4.203728000  |
| 1  | 17.962916000 | -1.062557000 | -4.479375000  |
| 1  | 18.356119000 | 0.671205000  | -4.383947000  |
| 1  | 15.463060000 | -1.295441000 | -2.818904000  |
| 16 | 13.701606000 | -0.954259000 | -5.578068000  |
| 8  | 13.295896000 | 0.351804000  | -6.050288000  |
| 8  | 13.322659000 | -1.479332000 | -4.279953000  |
| 6  | 13.415349000 | -2.183146000 | -6.805099000  |
| 6  | 13.345850000 | -3.518291000 | -6.406546000  |
| 6  | 13.244484000 | -1.802110000 | -8.134470000  |
| 6  | 13.107410000 | -4.486608000 | -7.371338000  |
| 1  | 13.462787000 | -3.783997000 | -5.360566000  |
| 6  | 13.001887000 | -2.789784000 | -9.078878000  |
| 1  | 13.304280000 | -0.755862000 | -8.410900000  |
| 6  | 12.936099000 | -4.140305000 | -8.717149000  |
| 1  | 13.047023000 | -5.529893000 | -7.074092000  |
| 1  | 12.860371000 | -2.507367000 | -10.118411000 |
| 6  | 12.709487000 | -5.200271000 | -9.755013000  |
| 1  | 12.167481000 | -6.055359000 | -9.342600000  |
| 1  | 13.667160000 | -5.573211000 | -10.137073000 |
| 1  | 12.145594000 | -4.812538000 | -10.607247000 |
| 8  | 15.823058000 | -0.195659000 | -7.654875000  |
| 1  | 15.831449000 | -1.738242000 | -5.019853000  |
| 6  | 15.104428000 | 0.551709000  | -1.798390000  |
| 6  | 14.008405000 | -0.000512000 | -1.121996000  |
| 6  | 15.391069000 | 1.910647000  | -1.612765000  |
| 6  | 13.215777000 | 0.785850000  | -0.295310000  |

|    |              |              |              |
|----|--------------|--------------|--------------|
| 1  | 13.770411000 | -1.051060000 | -1.265188000 |
| 6  | 14.591256000 | 2.699440000  | -0.794146000 |
| 1  | 16.266618000 | 2.346223000  | -2.087872000 |
| 6  | 13.501248000 | 2.139792000  | -0.132331000 |
| 1  | 12.366208000 | 0.342581000  | 0.216078000  |
| 1  | 14.828742000 | 3.750931000  | -0.660732000 |
| 1  | 12.880474000 | 2.754797000  | 0.512763000  |
| 46 | 17.527363000 | -1.440537000 | -1.935043000 |
| 17 | 16.854491000 | -3.110095000 | -3.460156000 |
| 17 | 18.246086000 | 0.365260000  | -0.585222000 |
| 17 | 19.275254000 | -2.904764000 | -1.090478000 |
| 3  | 19.591506000 | -1.191437000 | 0.209203000  |

### Int-C:

The Number of Imaginary Frequencies = 0

PBE1PBE/6-31G(d,p)/Def2-TZVPP, G = -3368.188087

Thermal correction to Gibbs Free Energy = 0.438100

E(M062X/6-31G(d,p)/Def2-TZVPP,CH<sub>3</sub>CN) = -3370.86521586

|    |              |              |              |
|----|--------------|--------------|--------------|
| 6  | 17.462671000 | -0.305463000 | -3.014692000 |
| 6  | 16.641579000 | -1.005705000 | -2.125412000 |
| 7  | 15.163070000 | -1.506834000 | -4.525910000 |
| 6  | 15.474237000 | -0.543347000 | -5.406807000 |
| 8  | 16.759970000 | -0.086951000 | -5.312287000 |
| 6  | 17.666352000 | -0.757929000 | -4.440172000 |
| 1  | 17.610694000 | 0.762681000  | -2.865405000 |
| 1  | 17.556831000 | -1.838746000 | -4.517889000 |
| 1  | 18.659654000 | -0.466848000 | -4.791280000 |
| 1  | 16.353042000 | -2.005655000 | -2.431120000 |
| 16 | 13.683790000 | -2.168790000 | -4.546310000 |
| 8  | 13.627631000 | -2.993682000 | -3.319847000 |
| 8  | 13.436577000 | -2.896442000 | -5.808173000 |
| 6  | 12.440448000 | -0.911079000 | -4.363544000 |
| 6  | 11.987089000 | -0.193365000 | -5.468479000 |
| 6  | 11.944886000 | -0.657021000 | -3.086352000 |
| 6  | 11.030083000 | 0.795570000  | -5.278302000 |
| 1  | 12.396601000 | -0.368215000 | -6.454977000 |
| 6  | 10.979906000 | 0.329367000  | -2.920000000 |
| 1  | 12.313711000 | -1.233522000 | -2.244560000 |
| 6  | 10.508863000 | 1.068259000  | -4.009804000 |
| 1  | 10.707271000 | 1.371751000  | -6.141069000 |
| 1  | 10.588106000 | 0.531470000  | -1.925848000 |
| 6  | 9.451985000  | 2.121117000  | -3.827857000 |
| 1  | 8.458790000  | 1.725574000  | -4.072610000 |
| 1  | 9.628545000  | 2.978103000  | -4.484492000 |
| 1  | 9.416531000  | 2.481495000  | -2.795830000 |
| 8  | 14.768705000 | -0.020105000 | -6.266893000 |
| 6  | 15.897263000 | -0.483864000 | -0.980691000 |
| 6  | 15.113573000 | -1.393870000 | -0.253007000 |
| 6  | 15.865698000 | 0.873310000  | -0.623597000 |
| 6  | 14.338768000 | -0.966211000 | 0.817362000  |
| 1  | 15.103588000 | -2.437363000 | -0.554258000 |
| 6  | 15.088621000 | 1.298302000  | 0.444048000  |
| 1  | 16.444699000 | 1.597167000  | -1.186003000 |
| 6  | 14.328899000 | 0.381086000  | 1.170546000  |
| 1  | 13.736487000 | -1.681044000 | 1.369980000  |
| 1  | 15.067743000 | 2.351377000  | 0.708107000  |
| 1  | 13.720780000 | 0.720409000  | 2.004363000  |
| 46 | 18.824290000 | -1.284151000 | -1.676099000 |
| 17 | 18.611080000 | -3.377188000 | -2.610281000 |
| 17 | 19.238031000 | 0.878375000  | -0.754240000 |
| 1  | 14.789184000 | 1.288311000  | -7.255733000 |
| 8  | 14.789176000 | 2.083045000  | -7.857046000 |
| 6  | 13.575612000 | 2.301676000  | -8.341105000 |

|    |              |              |               |
|----|--------------|--------------|---------------|
| 8  | 12.594346000 | 1.626556000  | -8.100194000  |
| 6  | 13.552494000 | 3.508467000  | -9.246222000  |
| 1  | 13.882988000 | 4.393404000  | -8.694799000  |
| 1  | 14.252530000 | 3.365323000  | -10.074332000 |
| 1  | 12.545228000 | 3.662737000  | -9.631564000  |
| 6  | 14.600580000 | -5.850079000 | -5.747217000  |
| 1  | 14.013159000 | -4.926026000 | -5.701186000  |
| 1  | 14.824893000 | -6.097266000 | -6.786642000  |
| 1  | 14.070967000 | -6.677985000 | -5.272677000  |
| 6  | 15.612913000 | -5.386682000 | -3.571934000  |
| 1  | 15.174648000 | -6.294613000 | -3.152663000  |
| 1  | 16.554528000 | -5.147458000 | -3.073921000  |
| 1  | 14.913942000 | -4.546945000 | -3.477015000  |
| 6  | 16.757444000 | -6.836661000 | -5.157181000  |
| 1  | 16.979741000 | -7.001908000 | -6.212735000  |
| 1  | 17.682433000 | -6.667578000 | -4.603666000  |
| 1  | 16.232552000 | -7.701699000 | -4.748569000  |
| 7  | 15.891136000 | -5.636135000 | -5.023017000  |
| 6  | 16.593785000 | -4.453496000 | -5.611038000  |
| 1  | 17.523848000 | -4.294795000 | -5.062134000  |
| 1  | 16.793539000 | -4.661257000 | -6.663779000  |
| 1  | 15.952511000 | -3.575155000 | -5.512500000  |
| 17 | 20.717978000 | -2.164984000 | -0.455408000  |
| 3  | 20.823012000 | -0.153717000 | 0.382154000   |

#### Int-D:

The Number of Imaginary Frequencies = 0

PBE1PBE/6-31G(d,p)/Def2-TZVPP, G = -3368.211902

Thermal correction to Gibbs Free Energy = 0.444617

E(M062X/6-31G(d,p)/Def2-TZVPP,CH<sub>3</sub>CN) = -3370.89603790

|    |              |              |              |
|----|--------------|--------------|--------------|
| 6  | -3.348501000 | -1.890652000 | 1.869132000  |
| 6  | -4.038729000 | -3.254267000 | 1.844550000  |
| 7  | -3.813149000 | -0.999510000 | 0.787558000  |
| 6  | -2.812812000 | -0.738345000 | -0.128017000 |
| 8  | -1.691996000 | -1.342108000 | 0.262270000  |
| 6  | -1.834358000 | -1.811598000 | 1.613587000  |
| 1  | -3.579079000 | -1.418132000 | 2.834235000  |
| 1  | -1.338198000 | -2.777114000 | 1.677826000  |
| 1  | -1.349756000 | -1.078531000 | 2.267891000  |
| 1  | -5.101329000 | -3.046129000 | 1.704265000  |
| 16 | -5.240061000 | -0.077607000 | 0.897651000  |
| 8  | -6.081015000 | -0.803031000 | 1.830404000  |
| 8  | -5.656928000 | 0.215665000  | -0.463023000 |
| 6  | -4.702653000 | 1.417497000  | 1.681016000  |
| 6  | -4.165353000 | 2.452026000  | 0.915551000  |
| 6  | -4.825125000 | 1.521315000  | 3.065473000  |
| 6  | -3.733337000 | 3.600011000  | 1.567112000  |
| 1  | -4.100731000 | 2.383437000  | -0.166940000 |
| 6  | -4.384903000 | 2.680945000  | 3.692456000  |
| 1  | -5.282680000 | 0.714761000  | 3.629394000  |
| 6  | -3.828089000 | 3.732066000  | 2.957368000  |
| 1  | -3.322942000 | 4.414563000  | 0.976028000  |
| 1  | -4.484708000 | 2.774863000  | 4.770615000  |
| 6  | -3.331691000 | 4.973636000  | 3.640994000  |
| 1  | -3.593137000 | 5.871479000  | 3.073360000  |
| 1  | -2.239374000 | 4.955459000  | 3.732919000  |
| 1  | -3.746334000 | 5.071796000  | 4.647450000  |
| 8  | -2.872879000 | -0.075391000 | -1.145025000 |
| 6  | -3.883972000 | -4.073152000 | 3.081749000  |
| 6  | -4.863819000 | -5.044170000 | 3.352843000  |
| 6  | -2.842328000 | -3.922349000 | 4.006805000  |
| 6  | -4.798671000 | -5.834118000 | 4.491625000  |
| 1  | -5.678896000 | -5.170062000 | 2.644060000  |

|    |              |              |              |
|----|--------------|--------------|--------------|
| 6  | -2.779494000 | -4.710366000 | 5.153370000  |
| 1  | -2.060866000 | -3.185590000 | 3.842757000  |
| 6  | -3.753457000 | -5.671620000 | 5.400853000  |
| 1  | -5.570321000 | -6.576832000 | 4.675465000  |
| 1  | -1.960684000 | -4.571678000 | 5.854369000  |
| 1  | -3.701476000 | -6.287312000 | 6.294354000  |
| 46 | -3.658911000 | -4.426828000 | 0.220675000  |
| 17 | -5.875929000 | -4.087169000 | -0.416723000 |
| 17 | -1.434913000 | -5.054745000 | 0.973888000  |
| 1  | -3.946941000 | 0.720353000  | -2.269032000 |
| 8  | -4.338152000 | 0.984479000  | -3.137587000 |
| 6  | -4.451199000 | 2.316020000  | -3.190322000 |
| 8  | -4.121165000 | 3.052787000  | -2.288559000 |
| 6  | -5.032069000 | 2.779885000  | -4.497045000 |
| 1  | -4.416070000 | 2.427195000  | -5.329185000 |
| 1  | -6.034466000 | 2.361317000  | -4.627183000 |
| 1  | -5.083860000 | 3.867433000  | -4.508410000 |
| 6  | -5.089907000 | -1.901924000 | -5.138543000 |
| 1  | -4.774372000 | -0.868581000 | -4.984261000 |
| 1  | -4.326812000 | -2.452608000 | -5.691271000 |
| 1  | -6.036299000 | -1.932389000 | -5.681712000 |
| 6  | -5.722853000 | -3.952719000 | -3.962001000 |
| 1  | -4.964306000 | -4.504577000 | -4.518232000 |
| 1  | -5.832789000 | -4.385462000 | -2.964008000 |
| 1  | -6.673422000 | -3.957355000 | -4.499082000 |
| 6  | -3.972231000 | -2.514206000 | -3.069367000 |
| 1  | -3.617024000 | -1.486619000 | -3.011179000 |
| 1  | -4.140690000 | -2.924083000 | -2.071599000 |
| 1  | -3.260363000 | -3.147290000 | -3.599714000 |
| 6  | -6.300462000 | -1.772989000 | -3.030457000 |
| 1  | -7.238954000 | -1.800791000 | -3.588058000 |
| 1  | -6.414015000 | -2.254331000 | -2.056875000 |
| 1  | -5.954400000 | -0.747438000 | -2.904850000 |
| 7  | -5.273614000 | -2.536454000 | -3.807893000 |
| 17 | -3.303553000 | -5.836435000 | -1.980824000 |
| 3  | -1.665881000 | -6.422900000 | -0.711759000 |

#### TS<sub>CD</sub>:

The Number of Imaginary Frequencies = 1 (-250.3031 cm<sup>-1</sup>)

PBE1PBE/6-31G(d,p)/Def2-TZVPP, G = -3368.174159

Thermal correction to Gibbs Free Energy = 0.436580

E(M062X/6-31G(d,p)/Def2-TZVPP,CH<sub>3</sub>CN) = -3370.85472786

|    |              |              |              |
|----|--------------|--------------|--------------|
| 6  | 16.499114000 | -0.690077000 | -3.020143000 |
| 6  | 16.143422000 | -1.881182000 | -2.363897000 |
| 7  | 14.806268000 | -0.248368000 | -4.331131000 |
| 6  | 15.398080000 | 0.548651000  | -5.244423000 |
| 8  | 16.751128000 | 0.535777000  | -5.095009000 |
| 6  | 17.245563000 | -0.550212000 | -4.321158000 |
| 1  | 16.433776000 | 0.239786000  | -2.457780000 |
| 1  | 17.215630000 | -1.482913000 | -4.891144000 |
| 1  | 18.293870000 | -0.307376000 | -4.125287000 |
| 1  | 16.021762000 | -2.748304000 | -3.002809000 |
| 16 | 13.246949000 | -0.690546000 | -4.491390000 |
| 8  | 13.019854000 | -1.706678000 | -3.453591000 |
| 8  | 12.987100000 | -1.108007000 | -5.882737000 |
| 6  | 12.222335000 | 0.703765000  | -4.110375000 |
| 6  | 11.867165000 | 1.605514000  | -5.111355000 |
| 6  | 11.803184000 | 0.872617000  | -2.792000000 |
| 6  | 11.078621000 | 2.696871000  | -4.765855000 |
| 1  | 12.184295000 | 1.463980000  | -6.140849000 |
| 6  | 11.017361000 | 1.973326000  | -2.473521000 |
| 1  | 12.078089000 | 0.138222000  | -2.041182000 |
| 6  | 10.648226000 | 2.902836000  | -3.451294000 |



|    |              |              |               |    |              |              |              |
|----|--------------|--------------|---------------|----|--------------|--------------|--------------|
| 1  | 10.790211000 | 3.400308000  | -5.542788000  | 6  | -3.216025000 | -1.999939000 | -0.511483000 |
| 1  | 10.677485000 | 2.109652000  | -1.449774000  | 1  | -3.045000000 | -2.825782000 | 0.190203000  |
| 6  | 9.822411000  | 4.106733000  | -3.096372000  | 1  | -1.172570000 | -1.449594000 | -0.187639000 |
| 1  | 9.111383000  | 4.350782000  | -3.891029000  | 6  | -3.126775000 | -2.591623000 | -1.882437000 |
| 1  | 10.460183000 | 4.986797000  | -2.950949000  | 6  | -3.006326000 | -3.985633000 | -1.990778000 |
| 1  | 9.261253000  | 3.950955000  | -2.170937000  | 6  | -3.143932000 | -1.849472000 | -3.073634000 |
| 8  | 14.909238000 | 1.254199000  | -6.116387000  | 6  | -2.892596000 | -4.613461000 | -3.225891000 |
| 6  | 15.333464000 | -1.926587000 | -1.127688000  | 1  | -3.000191000 | -4.585949000 | -1.083723000 |
| 6  | 15.138870000 | -3.169234000 | -0.509245000  | 6  | -3.022225000 | -2.473283000 | -4.309854000 |
| 6  | 14.728520000 | -0.797707000 | -0.563484000  | 1  | -3.301739000 | -0.777672000 | -3.045573000 |
| 6  | 14.373853000 | -3.280827000 | 0.645209000   | 6  | -2.892449000 | -3.857140000 | -4.394034000 |
| 1  | 15.614602000 | -4.050057000 | -0.935042000  | 1  | -2.800365000 | -5.694831000 | -3.274047000 |
| 6  | 13.960507000 | -0.910185000 | 0.589779000   | 1  | -3.043686000 | -1.873111000 | -5.215108000 |
| 1  | 14.838438000 | 0.172756000  | -1.036653000  | 1  | -2.801368000 | -4.341372000 | -5.361931000 |
| 6  | 13.781480000 | -2.149210000 | 1.200604000   | 16 | -3.016682000 | -0.742673000 | 2.505800000  |
| 1  | 14.241033000 | -4.252103000 | 1.113482000   | 8  | -3.506004000 | 0.418144000  | 3.208369000  |
| 1  | 13.496423000 | -0.023520000 | 1.012713000   | 8  | -3.946750000 | -1.816046000 | 2.069839000  |
| 1  | 13.181407000 | -2.232395000 | 2.102168000   | 6  | -1.761169000 | -1.539357000 | 3.454901000  |
| 46 | 18.199876000 | -2.074276000 | -1.935882000  | 6  | -0.842936000 | -0.732526000 | 4.129118000  |
| 17 | 18.187461000 | -3.791930000 | -3.507618000  | 6  | -1.704323000 | -2.928401000 | 3.518386000  |
| 17 | 18.214636000 | -0.270886000 | -0.366322000  | 6  | 0.153683000  | -1.347252000 | 4.872517000  |
| 1  | 14.338244000 | 0.775094000  | -7.657644000  | 1  | -0.909450000 | 0.348476000  | 4.052960000  |
| 8  | 14.185327000 | 0.468636000  | -8.585184000  | 6  | -0.699976000 | -3.518264000 | 4.277495000  |
| 6  | 13.016667000 | 0.922151000  | -9.020806000  | 1  | -2.444383000 | -3.527898000 | 2.999365000  |
| 8  | 12.244262000 | 1.587295000  | -8.361708000  | 6  | 0.239585000  | -2.742738000 | 4.962766000  |
| 6  | 12.762969000 | 0.520294000  | -10.450679000 | 1  | 0.878916000  | -0.731874000 | 5.398143000  |
| 1  | 13.531104000 | 0.953992000  | -11.097560000 | 1  | -0.648934000 | -4.601705000 | 4.341967000  |
| 1  | 12.829846000 | -0.566439000 | -10.552859000 | 17 | -5.963394000 | -0.862798000 | -1.819876000 |
| 1  | 11.778006000 | 0.866287000  | -10.761245000 | 6  | 1.305688000  | -3.385632000 | 5.801631000  |
| 6  | 13.233685000 | -4.243165000 | -6.571256000  | 1  | 1.044922000  | -3.331232000 | 6.864936000  |
| 1  | 12.865144000 | -3.255214000 | -6.278875000  | 1  | 1.436815000  | -4.440063000 | 5.546723000  |
| 1  | 13.412871000 | -4.268013000 | -7.647597000  | 1  | 2.267836000  | -2.880070000 | 5.678060000  |
| 1  | 12.528222000 | -5.027256000 | -6.291101000  | 17 | -7.105635000 | -0.955291000 | 1.514026000  |
| 6  | 14.297471000 | -4.519186000 | -4.389893000  | 3  | -7.707998000 | -0.484266000 | -0.507699000 |
| 1  | 13.616814000 | -5.343144000 | -4.167161000  |    |              |              |              |
| 1  | 15.259959000 | -4.681014000 | -3.899345000  |    |              |              |              |
| 1  | 13.854617000 | -3.568865000 | -4.071891000  |    |              |              |              |
| 6  | 15.108096000 | -5.794774000 | -6.295390000  |    |              |              |              |
| 1  | 15.276282000 | -5.774746000 | -7.373286000  |    |              |              |              |
| 1  | 16.054884000 | -5.945339000 | -5.773603000  |    |              |              |              |
| 1  | 14.410320000 | -6.594733000 | -6.042542000  |    |              |              |              |
| 7  | 14.529038000 | -4.492190000 | -5.869149000  |    |              |              |              |
| 6  | 15.488622000 | -3.394588000 | -6.207532000  |    |              |              |              |
| 1  | 16.405478000 | -3.546465000 | -5.631954000  |    |              |              |              |
| 1  | 15.693736000 | -3.433964000 | -7.278826000  |    |              |              |              |
| 1  | 15.020605000 | -2.440946000 | -5.959127000  |    |              |              |              |
| 17 | 20.474018000 | -2.706821000 | -1.325146000  |    |              |              |              |
| 3  | 20.215066000 | -1.074815000 | 0.085780000   |    |              |              |              |

#### Int-E:

The Number of Imaginary Frequencies = 0

PBE1PBE/6-31G(d,p)/Def2-TZVPP, G = -2465.345777

Thermal correction to Gibbs Free Energy = 0.239922

E(M062X/6-31G(d,p)/Def2-TZVPP,CH<sub>3</sub>CN) = -2467.16434406

|    |              |              |              |
|----|--------------|--------------|--------------|
| 6  | -2.045794000 | 0.286110000  | -1.091346000 |
| 1  | -1.451953000 | 0.119287000  | -1.988809000 |
| 1  | -3.035442000 | 0.682813000  | -1.344377000 |
| 46 | -5.005533000 | -1.433994000 | 0.244492000  |
| 7  | -2.301730000 | -0.223988000 | 1.084744000  |
| 6  | -1.589559000 | 0.989009000  | 1.020577000  |
| 8  | -1.218328000 | 1.672363000  | 1.932331000  |
| 8  | -1.352399000 | 1.244055000  | -0.276937000 |
| 6  | -2.154876000 | -0.948572000 | -0.202345000 |

#### Int-F:

The Number of Imaginary Frequencies = 0

PBE1PBE/6-31G(d,p)/Def2-TZVPP, G = -2933.020120

Thermal correction to Gibbs Free Energy = 0.229000

E(M062X/6-31G(d,p)/Def2-TZVPP,CH<sub>3</sub>CN) = -2935.03274935

|    |             |              |              |
|----|-------------|--------------|--------------|
| 6  | 4.398569000 | -2.870376000 | 2.132046000  |
| 1  | 4.904586000 | -3.515106000 | 2.855965000  |
| 1  | 5.094477000 | -2.109752000 | 1.770073000  |
| 46 | 0.916529000 | -1.811776000 | 4.463309000  |
| 7  | 1.881913000 | -0.594679000 | 3.181316000  |
| 6  | 2.948994000 | -1.045731000 | 2.430396000  |
| 8  | 3.450395000 | -0.464754000 | 1.489371000  |
| 8  | 3.362301000 | -2.233897000 | 2.904428000  |
| 6  | 3.823951000 | -3.658873000 | 1.003154000  |
| 6  | 4.062116000 | -3.364016000 | -0.280581000 |
| 1  | 4.701880000 | -2.506827000 | -0.490696000 |
| 1  | 3.187591000 | -4.496970000 | 1.281367000  |
| 6  | 3.564650000 | -4.074569000 | -1.461961000 |
| 6  | 2.581855000 | -5.074236000 | -1.398344000 |
| 6  | 4.087596000 | -3.742795000 | -2.719280000 |
| 6  | 2.152152000 | -5.722654000 | -2.547968000 |
| 1  | 2.139483000 | -5.335186000 | -0.441421000 |
| 6  | 3.659286000 | -4.392588000 | -3.871811000 |
| 1  | 4.844195000 | -2.964659000 | -2.786728000 |
| 6  | 2.690159000 | -5.387803000 | -3.790455000 |
| 1  | 1.388017000 | -6.491860000 | -2.477518000 |
| 1  | 4.082506000 | -4.119997000 | -4.834497000 |
| 1  | 2.350825000 | -5.896866000 | -4.687967000 |

|    |              |              |              |
|----|--------------|--------------|--------------|
| 16 | 1.335027000  | 0.923298000  | 2.839867000  |
| 8  | 0.225306000  | 1.116926000  | 3.824210000  |
| 8  | 2.396934000  | 1.915690000  | 2.864095000  |
| 6  | 0.566044000  | 0.925386000  | 1.247394000  |
| 6  | -0.773767000 | 0.566659000  | 1.128499000  |
| 6  | 1.327531000  | 1.282485000  | 0.136920000  |
| 6  | -1.357704000 | 0.575590000  | -0.132066000 |
| 1  | -1.344215000 | 0.291604000  | 2.008486000  |
| 6  | 0.722465000  | 1.281680000  | -1.112346000 |
| 1  | 2.372459000  | 1.540377000  | 0.263256000  |
| 6  | -0.623522000 | 0.931818000  | -1.267253000 |
| 1  | -2.403537000 | 0.299158000  | -0.236283000 |
| 1  | 1.307766000  | 1.555601000  | -1.986264000 |
| 17 | -0.209076000 | -3.233938000 | 5.983071000  |
| 6  | -1.266682000 | 0.961209000  | -2.624122000 |
| 1  | -1.509383000 | 1.989201000  | -2.918015000 |
| 1  | -0.598521000 | 0.554482000  | -3.388951000 |
| 1  | -2.195253000 | 0.384944000  | -2.640795000 |
| 17 | -0.156791000 | -2.802737000 | 2.597758000  |
| 17 | 1.959750000  | -0.776914000 | 6.280840000  |
| 3  | -0.941113000 | -4.159877000 | 4.136814000  |
| 3  | 0.620467000  | 0.850518000  | 5.587248000  |

### Int-G:

The Number of Imaginary Frequencies = 0

PBE1PBE/6-31G(d,p)/Def2-TZVPP, G = -2465.338218

Thermal correction to Gibbs Free Energy = 0.236013

E(M062X/6-31G(d,p)/Def2-TZVPP,CH<sub>3</sub>CN) = -2467.15229144

|    |              |              |              |
|----|--------------|--------------|--------------|
| 7  | -0.631312000 | -2.492037000 | 1.337001000  |
| 6  | -1.120637000 | -2.232376000 | 0.076926000  |
| 8  | -2.067568000 | -2.784348000 | -0.430289000 |
| 8  | -0.411656000 | -1.313798000 | -0.636151000 |
| 6  | 0.113123000  | -0.136898000 | -0.028459000 |
| 6  | 0.060358000  | -0.101069000 | 1.470429000  |
| 1  | 1.143847000  | -0.020272000 | -0.377611000 |
| 1  | -0.477557000 | 0.704878000  | -0.417484000 |
| 1  | -0.926345000 | -0.170099000 | 1.920998000  |
| 6  | 1.102162000  | 0.367627000  | 2.244226000  |
| 1  | 2.022817000  | 0.653530000  | 1.736947000  |
| 6  | 1.010268000  | 0.768611000  | 3.651080000  |
| 6  | -0.027964000 | 0.348168000  | 4.497049000  |
| 6  | -0.083001000 | 0.802866000  | 5.806875000  |
| 6  | 0.888114000  | 1.679012000  | 6.291953000  |
| 6  | 1.929472000  | 2.089515000  | 5.464264000  |
| 6  | 1.995312000  | 1.628710000  | 4.154967000  |
| 1  | -0.767450000 | -0.367870000 | 4.150293000  |
| 1  | -0.884404000 | 0.463601000  | 6.456003000  |
| 1  | 0.837644000  | 2.031539000  | 7.318094000  |
| 1  | 2.694337000  | 2.762693000  | 5.839647000  |
| 1  | 2.813515000  | 1.937594000  | 3.509851000  |
| 46 | 1.183707000  | -1.929524000 | 1.965220000  |
| 17 | 3.450042000  | -1.424407000 | 2.621523000  |
| 16 | -1.703993000 | -2.996924000 | 2.527025000  |
| 8  | -0.908432000 | -2.935692000 | 3.754683000  |
| 8  | -2.920175000 | -2.197250000 | 2.419742000  |
| 6  | -2.112114000 | -4.692956000 | 2.217780000  |
| 6  | -1.408920000 | -5.684953000 | 2.894196000  |
| 6  | -1.752877000 | -7.014630000 | 2.681662000  |
| 6  | -2.786775000 | -7.362350000 | 1.807917000  |
| 6  | -3.475339000 | -6.340147000 | 1.144530000  |
| 6  | -3.149889000 | -5.005430000 | 1.342166000  |
| 1  | -0.612216000 | -5.408990000 | 3.575820000  |
| 1  | -1.208992000 | -7.796815000 | 3.205052000  |

|    |              |              |             |
|----|--------------|--------------|-------------|
| 1  | -4.279518000 | -6.594910000 | 0.458933000 |
| 1  | -3.671152000 | -4.212089000 | 0.819914000 |
| 6  | -3.171308000 | -8.799670000 | 1.601386000 |
| 1  | -4.051745000 | -9.057837000 | 2.201812000 |
| 1  | -3.423193000 | -8.998095000 | 0.555449000 |
| 1  | -2.363977000 | -9.476710000 | 1.892639000 |
| 17 | 1.773798000  | -4.246930000 | 1.844156000 |
| 3  | 3.655961000  | -3.612492000 | 2.757497000 |

### Int-H:

The Number of Imaginary Frequencies = 0

PBE1PBE/6-31G(d,p)/Def2-TZVPP, G = -2465.354486

Thermal correction to Gibbs Free Energy = 0.238203

E(M062X/6-31G(d,p)/Def2-TZVPP,CH<sub>3</sub>CN) = -2467.16698862

|    |              |              |              |
|----|--------------|--------------|--------------|
| 6  | 3.629647000  | -0.449453000 | 2.307980000  |
| 7  | 2.238927000  | 1.459104000  | 2.354372000  |
| 6  | 3.396205000  | 0.833352000  | 3.102967000  |
| 46 | 1.129824000  | 1.590473000  | 4.161413000  |
| 16 | 2.795704000  | 2.880083000  | 1.416010000  |
| 8  | 3.396244000  | 3.732838000  | 2.428466000  |
| 6  | 2.874831000  | 0.663105000  | 4.520388000  |
| 8  | 3.596295000  | 2.292940000  | 0.349102000  |
| 1  | 4.263218000  | 1.496170000  | 3.062651000  |
| 1  | 3.852797000  | -1.303269000 | 2.949060000  |
| 1  | 4.408889000  | -0.334227000 | 1.548671000  |
| 6  | 1.381274000  | 3.663192000  | 0.739620000  |
| 6  | 0.949391000  | 3.296271000  | -0.534644000 |
| 6  | 0.782180000  | 4.699700000  | 1.451765000  |
| 6  | -0.114094000 | 3.985863000  | -1.094629000 |
| 1  | 1.439702000  | 2.490096000  | -1.067416000 |
| 6  | -0.277738000 | 5.376500000  | 0.866389000  |
| 1  | 1.141855000  | 4.965130000  | 2.439000000  |
| 6  | -0.741583000 | 5.031870000  | -0.406795000 |
| 1  | -0.466866000 | 3.707459000  | -2.083644000 |
| 1  | -0.760398000 | 6.180675000  | 1.414046000  |
| 6  | 3.675273000  | 1.257872000  | 5.619053000  |
| 6  | 4.321818000  | 2.497758000  | 5.491268000  |
| 6  | 3.796792000  | 0.566741000  | 6.833038000  |
| 6  | 5.074470000  | 3.014341000  | 6.539885000  |
| 1  | 4.217195000  | 3.074018000  | 4.575707000  |
| 6  | 4.550507000  | 1.084992000  | 7.878896000  |
| 1  | 3.287440000  | -0.385927000 | 6.952588000  |
| 6  | 5.196009000  | 2.310940000  | 7.736008000  |
| 1  | 5.565496000  | 3.976309000  | 6.422078000  |
| 1  | 4.634087000  | 0.529389000  | 8.808698000  |
| 1  | 5.786016000  | 2.717182000  | 8.552488000  |
| 1  | 2.602064000  | -0.375757000 | 4.735627000  |
| 17 | 0.331716000  | 1.191063000  | 6.361606000  |
| 6  | 1.679150000  | 0.418921000  | 1.499892000  |
| 8  | 0.731959000  | 0.551636000  | 0.787189000  |
| 8  | 2.389949000  | -0.703815000 | 1.639576000  |
| 6  | -1.874263000 | 5.788273000  | -1.037079000 |
| 1  | -1.496075000 | 6.646907000  | -1.604754000 |
| 1  | -2.437450000 | 5.158864000  | -1.730931000 |
| 1  | -2.565396000 | 6.172640000  | -0.282496000 |
| 17 | -0.998846000 | 2.752827000  | 3.472774000  |
| 3  | -1.446147000 | 2.163834000  | 5.510278000  |

### TS<sub>GH</sub>:

The Number of Imaginary Frequencies = 1 (-291.5561 cm<sup>-1</sup>)

PBE1PBE/6-31G(d,p)/Def2-TZVPP, G = -2465.323392

Thermal correction to Gibbs Free Energy = 0.237270

E(M062X/6-31G(d,p)/Def2-TZVPP,CH<sub>3</sub>CN) = -2467.13654456

|    |              |              |              |
|----|--------------|--------------|--------------|
| 7  | -0.608370000 | -2.212469000 | 1.289145000  |
| 6  | -1.049886000 | -2.210214000 | -0.036484000 |
| 8  | -1.785311000 | -3.023805000 | -0.530887000 |
| 8  | -0.615052000 | -1.151981000 | -0.751767000 |
| 6  | 0.036157000  | -0.117976000 | -0.039363000 |
| 6  | -0.172143000 | -0.211177000 | 1.447481000  |
| 1  | 1.106767000  | -0.144763000 | -0.269944000 |
| 1  | -0.379377000 | 0.829381000  | -0.404419000 |
| 1  | -1.179417000 | -0.034574000 | 1.819598000  |
| 6  | 0.940346000  | 0.030582000  | 2.281538000  |
| 1  | 1.843468000  | 0.348488000  | 1.755456000  |
| 6  | 0.854479000  | 0.495796000  | 3.677261000  |
| 6  | -0.303222000 | 0.374556000  | 4.458801000  |
| 6  | -0.334529000 | 0.883979000  | 5.750828000  |
| 6  | 0.783301000  | 1.518348000  | 6.288488000  |
| 6  | 1.940921000  | 1.638122000  | 5.523903000  |
| 6  | 1.975708000  | 1.130702000  | 4.231346000  |
| 1  | -1.174129000 | -0.145053000 | 4.075164000  |
| 1  | -1.238251000 | 0.777423000  | 6.343539000  |
| 1  | 0.753082000  | 1.913151000  | 7.299916000  |
| 1  | 2.819393000  | 2.127623000  | 5.934141000  |
| 1  | 2.882307000  | 1.219252000  | 3.638965000  |
| 46 | 1.319970000  | -2.063611000 | 1.967329000  |
| 17 | 3.552728000  | -1.689650000 | 2.693082000  |
| 17 | 1.766212000  | -4.416595000 | 1.504844000  |
| 3  | 3.721279000  | -3.849201000 | 2.285772000  |
| 16 | -1.738922000 | -2.753502000 | 2.452681000  |
| 8  | -1.022445000 | -2.601177000 | 3.714893000  |
| 8  | -2.965782000 | -2.001364000 | 2.208498000  |
| 6  | -2.058046000 | -4.473490000 | 2.201377000  |
| 6  | -1.286785000 | -5.401995000 | 2.893907000  |
| 6  | -1.576511000 | -6.752910000 | 2.746761000  |
| 6  | -2.623147000 | -7.181944000 | 1.926340000  |
| 6  | -3.383787000 | -6.220542000 | 1.249248000  |
| 6  | -3.111201000 | -4.867201000 | 1.378040000  |
| 1  | -0.480367000 | -5.066202000 | 3.535349000  |
| 1  | -0.978033000 | -7.486840000 | 3.279662000  |
| 1  | -4.200384000 | -6.539693000 | 0.606984000  |
| 1  | -3.691173000 | -4.121381000 | 0.848068000  |
| 6  | -2.946526000 | -8.641825000 | 1.788105000  |
| 1  | -3.820114000 | -8.906126000 | 2.395632000  |
| 1  | -3.183255000 | -8.899473000 | 0.751494000  |
| 1  | -2.113986000 | -9.269889000 | 2.114939000  |

#### Int-I:

The Number of Imaginary Frequencies = 0

PBE1PBE/6-31G(d,p)/Def2-TZVPP, G = -2465.360387

Thermal correction to Gibbs Free Energy = 0.239189

E(M062X/6-31G(d,p)/Def2-TZVPP,CH<sub>3</sub>CN) = -2467.17646082

|    |              |              |             |
|----|--------------|--------------|-------------|
| 6  | 3.048134000  | -1.831453000 | 2.737048000 |
| 7  | 1.944079000  | 0.182096000  | 2.731034000 |
| 6  | 3.195912000  | -0.385969000 | 3.253640000 |
| 46 | 2.960056000  | 1.469706000  | 5.548119000 |
| 16 | 1.881639000  | 1.867478000  | 2.536844000 |
| 8  | 2.793032000  | 2.338040000  | 3.611204000 |
| 6  | 3.352262000  | -0.343103000 | 4.767798000 |
| 8  | 2.223309000  | 2.233820000  | 1.177572000 |
| 1  | 4.047877000  | 0.100122000  | 2.764655000 |
| 1  | 2.674615000  | -2.494213000 | 3.524280000 |
| 1  | 3.980443000  | -2.232027000 | 2.337249000 |
| 6  | 0.225714000  | 2.352909000  | 2.891265000 |
| 6  | -0.713881000 | 2.300638000  | 1.861171000 |
| 6  | -0.095512000 | 2.833108000  | 4.159197000 |

|    |              |              |             |
|----|--------------|--------------|-------------|
| 6  | -2.008956000 | 2.720007000  | 2.128444000 |
| 1  | -0.434896000 | 1.920567000  | 0.885827000 |
| 6  | -1.399048000 | 3.250513000  | 4.394978000 |
| 1  | 0.656588000  | 2.908914000  | 4.938989000 |
| 6  | -2.372237000 | 3.199729000  | 3.392174000 |
| 1  | -2.753028000 | 2.675592000  | 1.337911000 |
| 1  | -1.658901000 | 3.632107000  | 5.378501000 |
| 6  | 4.733042000  | -0.752076000 | 5.168369000 |
| 6  | 5.863227000  | -0.077424000 | 4.677453000 |
| 6  | 4.934021000  | -1.830349000 | 6.040901000 |
| 6  | 7.144934000  | -0.473127000 | 5.041953000 |
| 1  | 5.736057000  | 0.783060000  | 4.024316000 |
| 6  | 6.216302000  | -2.228577000 | 6.402297000 |
| 1  | 4.070471000  | -2.350776000 | 6.446042000 |
| 6  | 7.327180000  | -1.553476000 | 5.902771000 |
| 1  | 8.004523000  | 0.067343000  | 4.655892000 |
| 1  | 6.347998000  | -3.068180000 | 7.078993000 |
| 1  | 8.328824000  | -1.863449000 | 6.186119000 |
| 1  | 2.601718000  | -0.999173000 | 5.224129000 |
| 17 | 2.888422000  | 0.443822000  | 7.684668000 |
| 6  | 1.416100000  | -0.623122000 | 1.703568000 |
| 8  | 0.519278000  | -0.338665000 | 0.960445000 |
| 8  | 2.081295000  | -1.787668000 | 1.686904000 |
| 6  | -3.768606000 | 3.683917000  | 3.654044000 |
| 1  | -3.857091000 | 4.749822000  | 3.412711000 |
| 1  | -4.499239000 | 3.148490000  | 3.041948000 |
| 1  | -4.043922000 | 3.562626000  | 4.704939000 |
| 17 | 2.581436000  | 3.780992000  | 6.519803000 |
| 3  | 2.877472000  | 2.564168000  | 8.292361000 |

#### Int-J:

The Number of Imaginary Frequencies = 0

PBE1PBE/6-31G(d,p)/Def2-TZVPP, G = -7118.584484

Thermal correction to Gibbs Free Energy = 0.231640

E(M062X/6-31G(d,p)/Def2-TZVPP,CH<sub>3</sub>CN) = -7121.27903995

|    |              |              |              |
|----|--------------|--------------|--------------|
| 6  | -1.472994000 | -0.078313000 | -1.059907000 |
| 1  | -0.866509000 | -0.472440000 | -1.874344000 |
| 1  | -2.224093000 | 0.623963000  | -1.423983000 |
| 46 | -5.189736000 | -1.294709000 | -0.000763000 |
| 7  | -2.130164000 | -0.430984000 | 1.075594000  |
| 6  | -1.080707000 | 0.511116000  | 1.099335000  |
| 8  | -0.650025000 | 1.086551000  | 2.056065000  |
| 8  | -0.604907000 | 0.614933000  | -0.150687000 |
| 6  | -2.085841000 | -1.177276000 | -0.191237000 |
| 6  | -3.289133000 | -1.994226000 | -0.659629000 |
| 1  | -3.347307000 | -2.884027000 | -0.032747000 |
| 1  | -1.312788000 | -1.957661000 | -0.074648000 |
| 6  | -3.252600000 | -2.392601000 | -2.082466000 |
| 6  | -3.266286000 | -3.763591000 | -2.385124000 |
| 6  | -3.193885000 | -1.471253000 | -3.141761000 |
| 6  | -3.175058000 | -4.201990000 | -3.700625000 |
| 1  | -3.349944000 | -4.484972000 | -1.577034000 |
| 6  | -3.107821000 | -1.911748000 | -4.454417000 |
| 1  | -3.279949000 | -0.409094000 | -2.938492000 |
| 6  | -3.088876000 | -3.277102000 | -4.737918000 |
| 1  | -3.176724000 | -5.266266000 | -3.915588000 |
| 1  | -3.073826000 | -1.187538000 | -5.262616000 |
| 1  | -3.023917000 | -3.617676000 | -5.767075000 |
| 16 | -3.148014000 | -0.598028000 | 2.385905000  |
| 8  | -3.409334000 | 0.700076000  | 2.949002000  |
| 8  | -4.254862000 | -1.448656000 | 1.850186000  |
| 6  | -2.340095000 | -1.627095000 | 3.565496000  |
| 6  | -1.420261000 | -1.024736000 | 4.424509000  |

|    |              |              |              |    |              |              |              |
|----|--------------|--------------|--------------|----|--------------|--------------|--------------|
| 6  | -2.621621000 | -2.990805000 | 3.620869000  | 17 | -5.403185000 | -0.974892000 | -0.860198000 |
| 6  | -0.766059000 | -1.823597000 | 5.351526000  | 6  | 0.275637000  | -4.226262000 | 5.590002000  |
| 1  | -1.218969000 | 0.038984000  | 4.351302000  | 1  | -0.046838000 | -4.416479000 | 6.620236000  |
| 6  | -1.956756000 | -3.763357000 | 4.564352000  | 1  | 0.448989000  | -5.194525000 | 5.114301000  |
| 1  | -3.363521000 | -3.426542000 | 2.959669000  | 1  | 1.228149000  | -3.691662000 | 5.641785000  |
| 6  | -1.024039000 | -3.196922000 | 5.440196000  | 17 | -8.397055000 | -0.206894000 | 0.165333000  |
| 1  | -0.042957000 | -1.370271000 | 6.023845000  | 29 | -6.352883000 | 2.838183000  | 1.122387000  |
| 1  | -2.173411000 | -4.826210000 | 4.626880000  | 17 | -8.089873000 | 3.241815000  | 2.381898000  |
| 17 | -7.317108000 | -0.460658000 | 1.293414000  | 29 | -8.051300000 | 1.050155000  | 2.417232000  |
| 17 | -5.772296000 | -3.577376000 | 0.338828000  |    |              |              |              |
| 17 | -4.653350000 | 0.888414000  | -0.404058000 |    |              |              |              |
| 6  | -0.338036000 | -4.037609000 | 6.476855000  |    |              |              |              |
| 1  | -0.906808000 | -4.029249000 | 7.414087000  |    |              |              |              |
| 1  | -0.251159000 | -5.078814000 | 6.155971000  |    |              |              |              |
| 1  | 0.663371000  | -3.660035000 | 6.699495000  |    |              |              |              |
| 17 | -6.271603000 | -1.347751000 | -2.021427000 |    |              |              |              |
| 29 | -8.847071000 | -1.782772000 | 0.556300000  |    |              |              |              |
| 17 | -9.739230000 | -3.361926000 | -0.669100000 |    |              |              |              |
| 29 | -7.555285000 | -3.058240000 | -1.160657000 |    |              |              |              |

### Int-K:

The Number of Imaginary Frequencies = 0

PBE1PBE/6-31G(d,p)/Def2-TZVPP, G = -7118.609348

Thermal correction to Gibbs Free Energy = 0.229103

E(M062X/6-31G(d,p)/Def2-TZVPP,CH<sub>3</sub>CN) = -7121.33391591

|    |              |              |              |
|----|--------------|--------------|--------------|
| 6  | -2.235824000 | 0.116247000  | -0.660121000 |
| 1  | -1.457297000 | -0.184076000 | -1.359988000 |
| 1  | -3.032034000 | 0.681874000  | -1.155235000 |
| 46 | -6.594724000 | -1.058296000 | 1.217098000  |
| 7  | -3.175140000 | -0.315807000 | 1.351368000  |
| 6  | -2.261449000 | 0.774722000  | 1.507084000  |
| 8  | -2.017471000 | 1.362740000  | 2.516852000  |
| 8  | -1.648170000 | 0.953404000  | 0.333819000  |
| 6  | -2.804647000 | -1.057782000 | 0.141020000  |
| 6  | -3.866509000 | -1.901467000 | -0.565866000 |
| 1  | -4.173399000 | -2.712565000 | 0.094273000  |
| 1  | -1.998738000 | -1.773396000 | 0.375095000  |
| 6  | -3.339183000 | -2.472877000 | -1.858225000 |
| 6  | -2.837658000 | -3.776593000 | -1.844771000 |
| 6  | -3.294543000 | -1.732898000 | -3.043738000 |
| 6  | -2.284260000 | -4.330247000 | -2.995204000 |
| 1  | -2.884612000 | -4.364115000 | -0.930745000 |
| 6  | -2.749000000 | -2.292095000 | -4.194215000 |
| 1  | -3.706599000 | -0.728103000 | -3.079474000 |
| 6  | -2.239043000 | -3.588111000 | -4.171530000 |
| 1  | -1.899674000 | -5.345341000 | -2.973751000 |
| 1  | -2.727568000 | -1.713371000 | -5.112479000 |
| 1  | -1.815897000 | -4.021615000 | -5.072593000 |
| 16 | -3.909112000 | -0.957251000 | 2.714912000  |
| 8  | -4.363629000 | 0.123333000  | 3.548047000  |
| 8  | -4.899017000 | -1.924423000 | 2.139109000  |
| 6  | -2.710946000 | -1.943820000 | 3.545088000  |
| 6  | -1.809836000 | -1.285085000 | 4.384618000  |
| 6  | -2.662136000 | -3.322400000 | 3.347977000  |
| 6  | -0.839411000 | -2.038822000 | 5.028312000  |
| 1  | -1.873174000 | -0.209625000 | 4.517317000  |
| 6  | -1.682563000 | -4.052083000 | 4.010134000  |
| 1  | -3.394353000 | -3.812213000 | 2.715102000  |
| 6  | -0.760018000 | -3.426629000 | 4.855604000  |
| 1  | -0.131134000 | -1.539716000 | 5.683776000  |
| 1  | -1.639224000 | -5.129204000 | 3.874592000  |
| 17 | -4.669557000 | 2.519447000  | -0.147436000 |
| 17 | -7.757751000 | -1.038729000 | 3.192084000  |

### TS<sub>K</sub>:

The Number of Imaginary Frequencies = 1 (-171.172 cm<sup>-1</sup>)

PBE1PBE/6-31G(d,p)/Def2-TZVPP, G = -7118.559903

Thermal correction to Gibbs Free Energy = 0.227423

E(M062X/6-31G(d,p)/Def2-TZVPP,CH<sub>3</sub>CN) = -7121.28003953

|    |               |              |              |
|----|---------------|--------------|--------------|
| 6  | -1.102445000  | -0.084352000 | -1.012148000 |
| 1  | -0.372695000  | -0.456516000 | -1.731742000 |
| 1  | -1.800526000  | 0.616525000  | -1.479431000 |
| 46 | -5.500911000  | -1.636073000 | -0.039713000 |
| 7  | -2.057952000  | -0.536595000 | 0.998340000  |
| 6  | -1.050566000  | 0.423214000  | 1.194912000  |
| 8  | -0.772112000  | 0.984597000  | 2.213631000  |
| 8  | -0.397125000  | 0.586150000  | 0.027634000  |
| 6  | -1.854647000  | -1.203246000 | -0.289400000 |
| 6  | -3.000129000  | -1.911183000 | -0.949426000 |
| 1  | -3.431568000  | -2.653992000 | -0.284453000 |
| 1  | -1.152506000  | -2.047886000 | -0.132727000 |
| 6  | -3.055391000  | -2.295942000 | -2.329008000 |
| 6  | -3.713496000  | -3.516324000 | -2.611912000 |
| 6  | -2.494440000  | -1.564391000 | -3.398914000 |
| 6  | -3.747641000  | -4.017306000 | -3.901763000 |
| 1  | -4.207170000  | -4.050840000 | -1.803791000 |
| 6  | -2.544985000  | -2.065515000 | -4.687022000 |
| 1  | -2.057720000  | -0.588394000 | -3.231270000 |
| 6  | -3.160710000  | -3.294634000 | -4.939551000 |
| 1  | -4.249189000  | -4.957946000 | -4.103703000 |
| 1  | -2.118109000  | -1.494497000 | -5.505188000 |
| 1  | -3.200122000  | -3.677714000 | -5.955047000 |
| 16 | -3.202311000  | -0.804033000 | 2.235227000  |
| 8  | -3.622267000  | 0.484963000  | 2.713043000  |
| 8  | -4.146947000  | -1.773720000 | 1.634345000  |
| 6  | -2.368017000  | -1.703956000 | 3.499728000  |
| 6  | -1.625458000  | -0.990277000 | 4.440776000  |
| 6  | -2.483635000  | -3.092300000 | 3.549655000  |
| 6  | -0.971485000  | -1.699852000 | 5.437926000  |
| 1  | -1.557756000  | 0.089807000  | 4.377327000  |
| 6  | -1.823164000  | -3.774952000 | 4.562602000  |
| 1  | -3.104086000  | -3.617830000 | 2.831441000  |
| 6  | -1.058452000  | -3.094897000 | 5.516693000  |
| 1  | -0.385693000  | -1.157690000 | 6.175059000  |
| 1  | -1.912860000  | -4.856208000 | 4.619630000  |
| 17 | -7.245990000  | -0.182539000 | 1.838183000  |
| 17 | -6.152841000  | -3.810598000 | 0.547797000  |
| 17 | -4.441943000  | 0.236301000  | -0.885886000 |
| 6  | -0.373806000  | -3.839694000 | 6.625152000  |
| 1  | -0.993359000  | -3.834960000 | 7.529543000  |
| 1  | -0.192403000  | -4.883314000 | 6.356433000  |
| 1  | 0.583085000   | -3.378296000 | 6.884040000  |
| 17 | -6.724933000  | -1.834910000 | -1.966165000 |
| 29 | -8.879520000  | -1.425505000 | 1.273376000  |
| 17 | -10.174224000 | -2.924508000 | 0.338738000  |
| 29 | -8.119092000  | -2.992637000 | -0.560606000 |

**Int-L:**

The Number of Imaginary Frequencies = 0

PBE1PBE/6-31G(d,p)/Def2-TZVPP, G = -7118.601178

Thermal correction to Gibbs Free Energy = 0.230331

E(M062X/6-31G(d,p)/Def2-TZVPP,CH<sub>3</sub>CN) = -7121.29241679

|    |             |              |              |
|----|-------------|--------------|--------------|
| 6  | 4.031088000 | -1.974008000 | 2.614747000  |
| 7  | 2.451429000 | -0.376558000 | 2.238212000  |
| 6  | 3.695596000 | -0.511636000 | 2.998871000  |
| 16 | 1.558418000 | 1.046840000  | 2.094249000  |
| 8  | 0.156611000 | 0.712729000  | 2.113182000  |
| 6  | 3.521556000 | -0.404646000 | 4.502820000  |
| 8  | 2.151339000 | 1.915188000  | 3.147173000  |
| 1  | 4.458053000 | 0.181793000  | 2.628589000  |
| 1  | 3.663164000 | -2.675352000 | 3.370372000  |
| 1  | 5.099717000 | -2.127365000 | 2.466510000  |
| 6  | 2.004642000 | 1.828269000  | 0.584314000  |
| 6  | 3.108059000 | 2.682000000  | 0.560028000  |
| 6  | 1.231296000 | 1.577826000  | -0.549152000 |
| 6  | 3.437828000 | 3.291047000  | -0.643214000 |
| 1  | 3.676284000 | 2.879158000  | 1.464935000  |
| 6  | 1.586936000 | 2.200856000  | -1.736260000 |
| 1  | 0.383400000 | 0.905079000  | -0.493337000 |
| 6  | 2.687501000 | 3.064134000  | -1.802672000 |
| 1  | 4.289056000 | 3.965044000  | -0.678923000 |
| 1  | 0.997477000 | 2.014737000  | -2.629660000 |
| 6  | 4.623710000 | -0.968729000 | 5.299862000  |
| 6  | 5.976202000 | -0.801936000 | 4.957284000  |
| 6  | 4.300412000 | -1.770920000 | 6.407741000  |
| 6  | 6.968758000 | -1.432812000 | 5.695220000  |
| 1  | 6.247941000 | -0.145098000 | 4.137445000  |
| 6  | 5.295568000 | -2.402259000 | 7.140244000  |
| 1  | 3.257050000 | -1.890827000 | 6.688010000  |
| 6  | 6.632858000 | -2.235081000 | 6.784738000  |
| 1  | 8.010856000 | -1.291124000 | 5.425290000  |
| 1  | 5.029581000 | -3.022363000 | 7.990811000  |
| 1  | 7.413438000 | -2.723894000 | 7.360222000  |
| 1  | 2.558875000 | -0.825487000 | 4.799235000  |
| 6  | 2.363724000 | -1.334135000 | 1.210996000  |
| 8  | 1.569060000 | -1.351170000 | 0.316044000  |
| 8  | 3.353469000 | -2.223307000 | 1.386197000  |
| 6  | 3.033119000 | 3.758026000  | -3.087381000 |
| 1  | 2.837232000 | 3.117970000  | -3.951962000 |
| 1  | 2.426989000 | 4.663591000  | -3.207682000 |
| 1  | 4.083135000 | 4.059614000  | -3.111223000 |
| 46 | 3.071431000 | 1.640021000  | 4.984284000  |
| 17 | 2.416945000 | 4.190078000  | 5.263923000  |
| 17 | 1.067145000 | 0.879157000  | 5.972916000  |
| 17 | 5.026118000 | 2.351336000  | 4.002034000  |
| 17 | 4.081725000 | 1.560089000  | 7.037571000  |
| 29 | 1.589692000 | 4.239077000  | 7.248840000  |
| 17 | 1.010955000 | 3.465263000  | 9.211405000  |
| 29 | 1.966458000 | 1.867865000  | 7.931367000  |

**Int-M:**

The Number of Imaginary Frequencies = 0

PBE1PBE/6-31G(d,p)/Def2-TZVPP, G = -7118.628840

Thermal correction to Gibbs Free Energy = 0.228827

E(M062X/6-31G(d,p)/Def2-TZVPP,CH<sub>3</sub>CN) = -7121.33851197

|    |             |              |             |
|----|-------------|--------------|-------------|
| 6  | 4.638697000 | -0.870372000 | 2.441621000 |
| 7  | 2.561436000 | 0.037480000  | 2.255940000 |
| 6  | 3.620232000 | -0.054831000 | 3.251926000 |
| 16 | 1.433468000 | 1.282157000  | 2.075946000 |

|    |             |              |              |
|----|-------------|--------------|--------------|
| 8  | 0.093437000 | 0.748237000  | 2.158374000  |
| 6  | 3.192608000 | -0.835393000 | 4.497537000  |
| 8  | 1.889139000 | 2.304843000  | 3.059669000  |
| 1  | 4.030699000 | 0.931386000  | 3.492352000  |
| 1  | 5.194293000 | -1.589575000 | 3.043742000  |
| 1  | 5.328670000 | -0.198629000 | 1.922846000  |
| 6  | 1.746418000 | 1.990366000  | 0.501863000  |
| 6  | 2.850833000 | 2.828223000  | 0.337500000  |
| 6  | 0.872981000 | 1.690572000  | -0.540550000 |
| 6  | 3.066964000 | 3.379074000  | -0.916813000 |
| 1  | 3.525703000 | 3.042335000  | 1.162764000  |
| 6  | 1.116187000 | 2.259047000  | -1.783424000 |
| 1  | 0.033919000 | 1.024042000  | -0.375861000 |
| 6  | 2.207857000 | 3.109202000  | -1.990118000 |
| 1  | 3.922506000 | 4.032367000  | -1.063265000 |
| 1  | 0.447624000 | 2.034113000  | -2.609503000 |
| 6  | 4.265901000 | -1.020815000 | 5.518181000  |
| 6  | 5.039300000 | 0.054250000  | 5.969394000  |
| 6  | 4.512141000 | -2.302410000 | 6.020439000  |
| 6  | 6.043477000 | -0.150564000 | 6.907139000  |
| 1  | 4.856814000 | 1.061448000  | 5.602370000  |
| 6  | 5.522988000 | -2.507446000 | 6.953833000  |
| 1  | 3.909889000 | -3.141245000 | 5.679375000  |
| 6  | 6.287665000 | -1.431930000 | 7.398093000  |
| 1  | 6.628283000 | 0.696565000  | 7.252478000  |
| 1  | 5.709497000 | -3.506256000 | 7.336318000  |
| 1  | 7.073383000 | -1.590915000 | 8.130636000  |
| 1  | 2.769183000 | -1.798037000 | 4.195863000  |
| 6  | 2.696745000 | -0.947465000 | 1.260426000  |
| 8  | 1.927159000 | -1.174123000 | 0.372299000  |
| 8  | 3.854130000 | -1.593728000 | 1.483086000  |
| 6  | 2.444116000 | 3.741716000  | -3.330033000 |
| 1  | 1.997009000 | 3.154489000  | -4.135930000 |
| 1  | 1.998890000 | 4.743052000  | -3.364421000 |
| 1  | 3.512161000 | 3.853555000  | -3.535080000 |
| 46 | 2.037399000 | 2.333844000  | 5.139685000  |
| 17 | 5.772001000 | 2.590205000  | 2.650881000  |
| 17 | 2.305275000 | 4.602184000  | 4.996264000  |
| 17 | 1.696198000 | -0.024748000 | 5.258606000  |
| 17 | 2.394517000 | 2.471257000  | 7.374874000  |
| 29 | 5.998945000 | 3.381642000  | 4.621156000  |
| 17 | 6.215136000 | 4.047473000  | 6.681703000  |
| 29 | 4.016564000 | 3.967382000  | 6.381965000  |

**TS<sub>LM</sub>:**

The Number of Imaginary Frequencies = 1 (-180.5573)

PBE1PBE/6-31G(d,p)/Def2-TZVPP, G = -7118.571974

Thermal correction to Gibbs Free Energy = 0.224045

E(M062X/6-31G(d,p)/Def2-TZVPP,CH<sub>3</sub>CN) = -7121.28726954

|    |             |              |              |
|----|-------------|--------------|--------------|
| 6  | 4.442300000 | -1.921412000 | 2.442468000  |
| 7  | 2.575221000 | -0.607266000 | 2.189956000  |
| 6  | 3.802675000 | -0.606933000 | 2.984533000  |
| 16 | 1.409873000 | 0.659923000  | 2.083810000  |
| 8  | 0.132328000 | 0.012442000  | 1.925671000  |
| 6  | 3.587354000 | -0.783634000 | 4.467569000  |
| 8  | 1.721140000 | 1.499113000  | 3.262964000  |
| 1  | 4.428034000 | 0.263875000  | 2.766772000  |
| 1  | 4.247939000 | -2.765380000 | 3.111909000  |
| 1  | 5.518548000 | -1.818702000 | 2.297225000  |
| 6  | 1.812806000 | 1.671595000  | 0.707158000  |
| 6  | 2.540866000 | 2.842478000  | 0.926396000  |
| 6  | 1.340926000 | 1.308691000  | -0.557031000 |
| 6  | 2.816556000 | 3.651970000  | -0.167435000 |

|    |              |              |              |    |              |              |              |
|----|--------------|--------------|--------------|----|--------------|--------------|--------------|
| 1  | 2.830779000  | 3.154650000  | 1.927225000  | 8  | -3.505026000 | 0.640038000  | 2.945842000  |
| 6  | 1.644351000  | 2.135294000  | -1.628201000 | 8  | -4.299840000 | -1.520456000 | 1.832601000  |
| 1  | 0.762393000  | 0.402132000  | -0.688930000 | 6  | -2.385700000 | -1.665832000 | 3.548711000  |
| 6  | 2.382957000  | 3.313024000  | -1.453329000 | 6  | -1.476744000 | -1.049738000 | 4.409212000  |
| 1  | 3.361341000  | 4.577380000  | -0.003559000 | 6  | -2.639940000 | -3.034960000 | 3.598028000  |
| 1  | 1.291476000  | 1.866563000  | -2.619991000 | 6  | -0.805299000 | -1.839568000 | 5.331771000  |
| 6  | 4.605541000  | -1.252557000 | 5.358182000  | 1  | -1.296560000 | 0.018047000  | 4.339736000  |
| 6  | 5.985235000  | -1.099241000 | 5.092043000  | 6  | -1.958203000 | -3.798669000 | 4.537003000  |
| 6  | 4.198914000  | -1.936484000 | 6.522888000  | 1  | -3.373607000 | -3.481427000 | 2.934609000  |
| 6  | 6.919626000  | -1.656277000 | 5.942117000  | 6  | -1.035697000 | -3.218053000 | 5.414134000  |
| 1  | 6.310277000  | -0.512261000 | 4.238183000  | 1  | -0.090136000 | -1.375224000 | 6.005138000  |
| 6  | 5.144348000  | -2.488791000 | 7.373521000  | 1  | -2.152871000 | -4.866120000 | 4.594346000  |
| 1  | 3.140773000  | -2.007360000 | 6.755066000  | 17 | -7.451954000 | -0.832977000 | 1.053416000  |
| 6  | 6.499701000  | -2.353137000 | 7.082188000  | 17 | -5.781763000 | -3.692626000 | 0.300982000  |
| 1  | 7.978900000  | -1.537252000 | 5.738793000  | 17 | -4.753068000 | 0.803375000  | -0.414905000 |
| 1  | 4.826606000  | -3.012753000 | 8.268782000  | 6  | -0.330890000 | -4.050043000 | 6.445522000  |
| 1  | 7.240552000  | -2.777725000 | 7.753314000  | 1  | -0.899929000 | -4.062311000 | 7.382575000  |
| 1  | 2.575912000  | -1.101067000 | 4.726213000  | 1  | -0.219141000 | -5.086526000 | 6.116903000  |
| 6  | 2.684499000  | -1.467003000 | 1.081036000  | 1  | 0.661366000  | -3.650832000 | 6.671522000  |
| 8  | 1.925823000  | -1.561751000 | 0.162416000  | 17 | -6.321261000 | -1.495820000 | -2.019462000 |
| 8  | 3.826603000  | -2.172166000 | 1.195634000  | 3  | -7.716776000 | -2.521669000 | -0.359468000 |
| 6  | 2.662407000  | 4.218153000  | -2.616869000 |    |              |              |              |
| 1  | 2.717449000  | 3.660761000  | -3.555652000 |    |              |              |              |
| 1  | 1.863051000  | 4.961175000  | -2.721671000 |    |              |              |              |
| 1  | 3.599032000  | 4.764978000  | -2.481709000 |    |              |              |              |
| 46 | 1.873427000  | 1.111635000  | 5.306541000  |    |              |              |              |
| 17 | 2.644284000  | 5.095998000  | 3.630856000  |    |              |              |              |
| 17 | -0.427184000 | 0.691612000  | 5.475303000  |    |              |              |              |
| 17 | 4.078847000  | 1.664905000  | 5.073862000  |    |              |              |              |
| 17 | 2.123173000  | 0.710772000  | 7.496020000  |    |              |              |              |
| 29 | 1.186218000  | 4.906426000  | 5.163491000  |    |              |              |              |
| 17 | -0.319731000 | 4.842705000  | 6.746514000  |    |              |              |              |
| 29 | -0.324755000 | 2.768670000  | 6.143499000  |    |              |              |              |

### Int-N:

The Number of Imaginary Frequencies = 0

PBE1PBE/6-31G(d,p)/Def2-TZVPP, G = -3385.406022

Thermal correction to Gibbs Free Energy = 0.241942

E(M062X/6-31G(d,p)/Def2-TZVPP,CH<sub>3</sub>CN) = -3387.55296916

|    |              |              |              |
|----|--------------|--------------|--------------|
| 6  | -1.531064000 | -0.086412000 | -1.060150000 |
| 1  | -0.910217000 | -0.464563000 | -1.871173000 |
| 1  | -2.297297000 | 0.596333000  | -1.429418000 |
| 46 | -5.219676000 | -1.395882000 | -0.022963000 |
| 7  | -2.195623000 | -0.450150000 | 1.069462000  |
| 6  | -1.168005000 | 0.514592000  | 1.100926000  |
| 8  | -0.755864000 | 1.099843000  | 2.060588000  |
| 8  | -0.685952000 | 0.629737000  | -0.145437000 |
| 6  | -2.121930000 | -1.200248000 | -0.196123000 |
| 6  | -3.310543000 | -2.032677000 | -0.679748000 |
| 1  | -3.338454000 | -2.940284000 | -0.075177000 |
| 1  | -1.330103000 | -1.959014000 | -0.069153000 |
| 6  | -3.245019000 | -2.403325000 | -2.113348000 |
| 6  | -3.154592000 | -3.763705000 | -2.443507000 |
| 6  | -3.254833000 | -1.460360000 | -3.154199000 |
| 6  | -3.028228000 | -4.168706000 | -3.767263000 |
| 1  | -3.183530000 | -4.505373000 | -1.649967000 |
| 6  | -3.132619000 | -1.867117000 | -4.475402000 |
| 1  | -3.421857000 | -0.412193000 | -2.928386000 |
| 6  | -3.008829000 | -3.220664000 | -4.786330000 |
| 1  | -2.949682000 | -5.225992000 | -4.002260000 |
| 1  | -3.152005000 | -1.125867000 | -5.268703000 |
| 1  | -2.914559000 | -3.534853000 | -5.821702000 |
| 16 | -3.214079000 | -0.647464000 | 2.372405000  |

### Int-O:

The Number of Imaginary Frequencies = 0

PBE1PBE/6-31G(d,p)/Def2-TZVPP, G = -3385.454590

Thermal correction to Gibbs Free Energy = 0.235722

E(M062X/6-31G(d,p)/Def2-TZVPP,CH<sub>3</sub>CN) = -3387.62043836

|    |              |              |              |
|----|--------------|--------------|--------------|
| 6  | -0.921005000 | -1.543667000 | -0.008294000 |
| 1  | -0.456714000 | -2.532817000 | -0.047611000 |
| 1  | -0.808624000 | -1.046028000 | -0.972629000 |
| 46 | -5.392518000 | -3.868976000 | 2.706775000  |
| 7  | -2.237990000 | -1.222360000 | 1.825313000  |
| 6  | -0.990669000 | -0.634511000 | 2.085627000  |
| 8  | -0.639797000 | -0.134369000 | 3.115740000  |
| 8  | -0.240826000 | -0.765965000 | 0.982148000  |
| 6  | -2.393080000 | -1.628750000 | 0.433263000  |
| 6  | -3.359344000 | -0.752944000 | -0.381453000 |
| 1  | -4.335341000 | -0.784625000 | 0.108711000  |
| 1  | -2.770624000 | -2.655142000 | 0.385445000  |
| 6  | -3.486910000 | -1.288307000 | -1.790795000 |
| 6  | -4.209090000 | -2.475868000 | -1.960968000 |
| 6  | -2.889935000 | -0.689926000 | -2.900391000 |
| 6  | -4.325750000 | -3.053083000 | -3.220336000 |
| 1  | -4.673717000 | -2.958849000 | -1.103708000 |
| 6  | -3.011425000 | -1.270326000 | -4.161152000 |
| 1  | -2.347722000 | 0.242961000  | -2.782241000 |
| 6  | -3.727078000 | -2.451621000 | -4.325095000 |
| 1  | -4.889053000 | -3.974324000 | -3.335664000 |
| 1  | -2.547223000 | -0.790246000 | -5.017817000 |
| 1  | -3.822474000 | -2.900365000 | -5.309574000 |
| 16 | -3.434316000 | -1.264784000 | 2.993263000  |
| 8  | -3.788182000 | 0.059165000  | 3.450669000  |
| 8  | -4.484673000 | -2.044468000 | 2.273287000  |
| 6  | -2.737834000 | -2.196811000 | 4.314643000  |
| 6  | -2.587116000 | -1.561984000 | 5.542930000  |
| 6  | -2.353258000 | -3.523421000 | 4.114307000  |
| 6  | -2.048530000 | -2.284907000 | 6.599857000  |
| 1  | -2.878806000 | -0.523608000 | 5.654037000  |
| 6  | -1.818641000 | -4.221654000 | 5.186737000  |
| 1  | -2.473960000 | -4.005302000 | 3.147158000  |
| 6  | -1.661457000 | -3.618616000 | 6.441851000  |
| 1  | -1.921024000 | -1.800307000 | 7.563723000  |
| 1  | -1.516072000 | -5.255611000 | 5.045547000  |

|    |              |              |              |
|----|--------------|--------------|--------------|
| 17 | -6.707338000 | -2.769666000 | 4.348824000  |
| 17 | -4.064796000 | -4.845318000 | 1.130426000  |
| 17 | -2.847064000 | 0.966712000  | -0.308151000 |
| 6  | -1.102328000 | -4.400427000 | 7.594466000  |
| 1  | -1.872162000 | -5.048084000 | 8.030014000  |
| 1  | -0.278859000 | -5.045662000 | 7.275258000  |
| 1  | -0.736261000 | -3.742344000 | 8.386143000  |
| 17 | -6.452423000 | -5.887957000 | 3.049244000  |
| 3  | -7.760011000 | -4.696837000 | 4.378136000  |

**TS<sub>No</sub>:**

The Number of Imaginary Frequencies = 1 (-205.4079 cm<sup>-1</sup>)

PBE1PBE/6-31G(d,p)/Def2-TZVPP, G = -3385.373701

Thermal correction to Gibbs Free Energy = 0.237284

E(M062X/6-31G(d,p)/Def2-TZVPP,CH<sub>3</sub>CN) = -3387.54757873

|    |              |              |              |
|----|--------------|--------------|--------------|
| 6  | -1.742509000 | -0.016860000 | -0.887198000 |
| 1  | -1.116796000 | -0.335498000 | -1.721093000 |
| 1  | -2.662778000 | 0.457075000  | -1.240580000 |
| 46 | -5.325551000 | -2.314017000 | 1.312501000  |
| 7  | -2.112218000 | -0.361431000 | 1.327336000  |
| 6  | -1.335685000 | 0.800772000  | 1.185637000  |
| 8  | -0.982858000 | 1.547566000  | 2.051422000  |
| 8  | -1.004161000 | 0.924900000  | -0.113471000 |
| 6  | -2.050689000 | -1.150938000 | 0.092431000  |
| 6  | -3.148343000 | -2.135682000 | -0.203980000 |
| 1  | -3.219493000 | -2.866835000 | 0.595967000  |
| 1  | -1.164741000 | -1.813157000 | 0.149810000  |
| 6  | -3.399329000 | -2.722326000 | -1.496623000 |
| 6  | -3.821299000 | -4.070203000 | -1.500991000 |
| 6  | -3.243217000 | -2.058008000 | -2.730468000 |
| 6  | -4.016942000 | -4.745187000 | -2.694539000 |
| 1  | -4.011253000 | -4.568567000 | -0.553214000 |
| 6  | -3.448526000 | -2.736830000 | -3.919490000 |
| 1  | -3.000018000 | -1.003875000 | -2.762954000 |
| 6  | -3.825986000 | -4.081320000 | -3.905074000 |
| 1  | -4.337106000 | -5.781861000 | -2.682093000 |
| 1  | -3.329900000 | -2.216343000 | -4.864502000 |
| 1  | -3.991094000 | -4.604752000 | -4.842247000 |
| 16 | -2.863430000 | -0.674365000 | 2.823750000  |
| 8  | -3.469707000 | 0.552869000  | 3.265172000  |
| 8  | -3.656419000 | -1.900734000 | 2.575701000  |
| 6  | -1.593373000 | -1.183729000 | 3.934204000  |
| 6  | -0.861117000 | -0.201146000 | 4.600429000  |
| 6  | -1.372408000 | -2.543342000 | 4.150019000  |
| 6  | 0.126532000  | -0.605129000 | 5.487810000  |
| 1  | -1.059329000 | 0.847938000  | 4.412713000  |
| 6  | -0.381102000 | -2.917250000 | 5.047424000  |
| 1  | -1.987761000 | -3.285739000 | 3.652675000  |
| 6  | 0.381232000  | -1.960582000 | 5.726801000  |
| 1  | 0.707510000  | 0.149042000  | 6.011408000  |
| 1  | -0.204918000 | -3.973208000 | 5.232878000  |
| 17 | -7.346979000 | -1.659592000 | 3.174160000  |
| 17 | -5.306548000 | -4.479130000 | 2.237852000  |
| 17 | -4.936379000 | -0.428520000 | 0.009813000  |
| 6  | 1.424687000  | -2.377914000 | 6.721388000  |
| 1  | 0.999294000  | -2.410415000 | 7.731294000  |
| 1  | 1.816385000  | -3.373627000 | 6.498536000  |
| 1  | 2.261240000  | -1.674346000 | 6.742715000  |
| 17 | -6.941306000 | -3.027314000 | -0.111387000 |
| 3  | -7.529605000 | -3.591849000 | 2.191590000  |

**Int-P:**

The Number of Imaginary Frequencies = 0

PBE1PBE/6-31G(d,p)/Def2-TZVPP, G = -3853.043834

Thermal correction to Gibbs Free Energy = 0.239343

E(M062X/6-31G(d,p)/Def2-TZVPP,CH<sub>3</sub>CN) = -3855.39932305

|    |              |              |              |
|----|--------------|--------------|--------------|
| 6  | -1.523095000 | 0.019837000  | -1.021783000 |
| 1  | -0.829672000 | -0.358467000 | -1.774037000 |
| 1  | -2.295841000 | 0.669368000  | -1.436827000 |
| 46 | -5.202920000 | -1.362101000 | -0.047558000 |
| 7  | -2.222259000 | -0.396928000 | 1.098643000  |
| 6  | -1.241612000 | 0.620419000  | 1.157831000  |
| 8  | -0.873922000 | 1.205416000  | 2.135486000  |
| 8  | -0.761748000 | 0.787332000  | -0.077621000 |
| 6  | -2.097226000 | -1.121836000 | -0.177795000 |
| 6  | -3.272514000 | -1.976956000 | -0.649013000 |
| 1  | -3.292542000 | -2.867173000 | -0.019326000 |
| 1  | -1.280136000 | -1.858335000 | -0.076085000 |
| 6  | -3.239603000 | -2.408708000 | -2.070916000 |
| 6  | -3.297900000 | -3.786487000 | -2.353047000 |
| 6  | -3.146378000 | -1.516978000 | -3.154746000 |
| 6  | -3.230157000 | -4.259773000 | -3.664325000 |
| 1  | -3.384848000 | -4.490129000 | -1.531685000 |
| 6  | -3.068240000 | -1.987786000 | -4.464987000 |
| 1  | -3.162637000 | -0.448352000 | -2.976908000 |
| 6  | -3.103648000 | -3.361474000 | -4.728560000 |
| 1  | -3.265338000 | -5.328398000 | -3.852213000 |
| 1  | -2.987309000 | -1.279483000 | -5.283522000 |
| 1  | -3.046058000 | -3.724777000 | -5.749877000 |
| 16 | -3.244750000 | -0.647427000 | 2.382364000  |
| 8  | -3.576083000 | 0.615740000  | 2.987168000  |
| 8  | -4.321067000 | -1.523639000 | 1.811200000  |
| 6  | -2.414929000 | -1.684321000 | 3.539638000  |
| 6  | -1.505764000 | -1.074425000 | 4.404787000  |
| 6  | -2.650992000 | -3.057119000 | 3.561039000  |
| 6  | -0.816644000 | -1.875007000 | 5.304268000  |
| 1  | -1.335540000 | -0.003841000 | 4.352859000  |
| 6  | -1.951826000 | -3.831432000 | 4.478071000  |
| 1  | -3.380975000 | -3.500341000 | 2.891805000  |
| 6  | -1.028265000 | -3.257940000 | 5.358588000  |
| 1  | -0.098768000 | -1.416291000 | 5.978487000  |
| 1  | -2.129623000 | -4.902731000 | 4.511958000  |
| 17 | -7.440611000 | -0.824576000 | 0.966278000  |
| 17 | -5.768134000 | -3.669727000 | 0.213761000  |
| 17 | -4.758110000 | 0.845573000  | -0.392016000 |
| 6  | -0.298557000 | -4.103169000 | 6.361254000  |
| 1  | -0.849136000 | -4.136676000 | 7.308791000  |
| 1  | -0.185075000 | -5.132218000 | 6.010885000  |
| 1  | 0.695041000  | -3.700543000 | 6.574796000  |
| 17 | -6.244357000 | -1.429032000 | -2.083325000 |
| 3  | -7.691668000 | -2.496526000 | -0.472900000 |
| 17 | 0.495546000  | -2.742364000 | -2.034444000 |
| 3  | -1.167075000 | -3.064110000 | -3.288355000 |

**Int-Q:**

The Number of Imaginary Frequencies = 0

PBE1PBE/6-31G(d,p)/Def2-TZVPP, G = -3853.046474

Thermal correction to Gibbs Free Energy = 0.235344

E(M062X/6-31G(d,p)/Def2-TZVPP,CH<sub>3</sub>CN) = -3855.44278282

|    |              |              |              |
|----|--------------|--------------|--------------|
| 6  | -0.842367000 | -1.919383000 | -0.687789000 |
| 1  | -0.171177000 | -2.514870000 | -0.062363000 |
| 1  | -0.681289000 | -2.183448000 | -1.733210000 |
| 46 | -6.109408000 | -3.038572000 | 1.885826000  |
| 7  | -2.452713000 | -0.874225000 | 0.562215000  |

|    |              |              |              |
|----|--------------|--------------|--------------|
| 6  | -1.376105000 | 0.009411000  | 0.406556000  |
| 8  | -1.199075000 | 1.066890000  | 0.932474000  |
| 8  | -0.533323000 | -0.536143000 | -0.509961000 |
| 6  | -2.294551000 | -2.094685000 | -0.224085000 |
| 6  | -3.409242000 | -2.193923000 | -1.278461000 |
| 1  | -4.253256000 | -2.734924000 | -0.842484000 |
| 1  | -2.384426000 | -3.010253000 | 0.377073000  |
| 6  | -3.896079000 | -0.947780000 | -1.967489000 |
| 6  | -5.272186000 | -0.856833000 | -2.233197000 |
| 6  | -3.017520000 | -0.037562000 | -2.580239000 |
| 6  | -5.751272000 | 0.074853000  | -3.160302000 |
| 1  | -5.946676000 | -1.558292000 | -1.743448000 |
| 6  | -3.501122000 | 0.893534000  | -3.502382000 |
| 1  | -1.952847000 | -0.076572000 | -2.365886000 |
| 6  | -4.864859000 | 0.933730000  | -3.816398000 |
| 1  | -6.815001000 | 0.120098000  | -3.373761000 |
| 1  | -2.811979000 | 1.582262000  | -3.981694000 |
| 1  | -5.233808000 | 1.644736000  | -4.549168000 |
| 16 | -3.652074000 | -0.671292000 | 1.764374000  |
| 8  | -3.884985000 | 0.742545000  | 1.933315000  |
| 8  | -4.722762000 | -1.516187000 | 1.190968000  |
| 6  | -2.926482000 | -1.366851000 | 3.204017000  |
| 6  | -2.505997000 | -0.484386000 | 4.195878000  |
| 6  | -2.746638000 | -2.746321000 | 3.308277000  |
| 6  | -1.896389000 | -1.008686000 | 5.327881000  |
| 1  | -2.662819000 | 0.582201000  | 4.078285000  |
| 6  | -2.128278000 | -3.238361000 | 4.447188000  |
| 1  | -3.081914000 | -3.439857000 | 2.538472000  |
| 6  | -1.703665000 | -2.386029000 | 5.473710000  |
| 1  | -1.569743000 | -0.334640000 | 6.114841000  |
| 1  | -1.989567000 | -4.311730000 | 4.541016000  |
| 17 | -3.052229000 | -5.310497000 | 0.765410000  |
| 17 | -6.353016000 | -3.724787000 | -0.375667000 |
| 17 | -6.091638000 | -2.269927000 | 4.010552000  |
| 6  | -1.082750000 | -2.947426000 | 6.719133000  |
| 1  | -1.860846000 | -3.302584000 | 7.404784000  |
| 1  | -0.436148000 | -3.799952000 | 6.492960000  |
| 1  | -0.492156000 | -2.195884000 | 7.249258000  |
| 17 | -7.043562000 | -5.008826000 | 2.513062000  |
| 3  | -5.250438000 | -5.424381000 | 0.939092000  |
| 17 | -2.911190000 | -3.311180000 | -2.673401000 |
| 3  | -4.001039000 | -1.559807000 | -4.070556000 |

### TS<sub>PO</sub>:

The Number of Imaginary Frequencies = 1 (-67.9633 cm<sup>-1</sup>)  
PBE1PBE/6-31G(d,p)/Def2-TZVPP, G = -3853.008277  
Thermal correction to Gibbs Free Energy = 0.233418  
E(M062X/6-31G(d,p)/Def2-TZVPP,CH<sub>3</sub>CN) = -3855.39065771

|    |              |              |              |
|----|--------------|--------------|--------------|
| 6  | 0.005355000  | -1.545896000 | -1.124445000 |
| 1  | 0.666579000  | -2.377180000 | -1.362534000 |
| 1  | -0.220304000 | -0.993043000 | -2.039145000 |
| 46 | -5.734838000 | -2.018374000 | 0.164111000  |
| 7  | -1.473889000 | -0.836066000 | 0.455304000  |
| 6  | -0.246860000 | -0.195656000 | 0.690500000  |
| 8  | -0.006622000 | 0.630540000  | 1.523044000  |
| 8  | 0.650340000  | -0.684347000 | -0.188023000 |
| 6  | -1.282548000 | -2.001338000 | -0.405960000 |
| 6  | -2.470303000 | -2.338335000 | -1.262828000 |
| 1  | -2.788912000 | -3.373976000 | -1.201352000 |
| 1  | -1.067238000 | -2.887904000 | 0.205176000  |
| 6  | -3.417801000 | -1.441106000 | -1.799467000 |
| 6  | -4.679973000 | -1.989032000 | -2.192631000 |
| 6  | -3.146896000 | -0.070047000 | -2.079493000 |

|    |              |              |              |
|----|--------------|--------------|--------------|
| 6  | -5.532868000 | -1.235620000 | -3.026768000 |
| 1  | -4.848548000 | -3.056355000 | -2.075058000 |
| 6  | -4.012649000 | 0.656059000  | -2.869241000 |
| 1  | -2.238526000 | 0.388627000  | -1.706203000 |
| 6  | -5.198850000 | 0.062957000  | -3.367190000 |
| 1  | -6.465008000 | -1.676099000 | -3.363643000 |
| 1  | -3.790819000 | 1.692128000  | -3.103448000 |
| 1  | -5.861920000 | 0.644463000  | -4.000068000 |
| 16 | -2.791601000 | -0.691806000 | 1.558469000  |
| 8  | -3.082194000 | 0.714796000  | 1.660684000  |
| 8  | -3.709673000 | -1.676980000 | 0.951022000  |
| 6  | -2.295331000 | -1.368129000 | 3.104269000  |
| 6  | -1.464295000 | -0.621337000 | 3.942254000  |
| 6  | -2.806616000 | -2.611695000 | 3.477215000  |
| 6  | -1.115748000 | -1.163726000 | 5.169839000  |
| 1  | -1.098072000 | 0.350096000  | 3.630144000  |
| 6  | -2.445665000 | -3.121417000 | 4.717663000  |
| 1  | -3.503841000 | -3.138655000 | 2.832888000  |
| 6  | -1.598126000 | -2.414611000 | 5.576400000  |
| 1  | -0.464209000 | -0.600203000 | 5.831986000  |
| 1  | -2.847330000 | -4.081507000 | 5.028868000  |
| 17 | -6.538793000 | -2.502457000 | 2.794868000  |
| 17 | -5.132807000 | -4.330810000 | 0.183545000  |
| 17 | -6.255809000 | 0.182851000  | 0.033640000  |
| 6  | -1.247895000 | -2.964839000 | 6.927870000  |
| 1  | -1.973975000 | -2.626909000 | 7.676603000  |
| 1  | -1.260517000 | -4.057798000 | 6.930928000  |
| 1  | -0.260162000 | -2.629080000 | 7.254771000  |
| 17 | -7.773864000 | -2.622012000 | -0.699061000 |
| 3  | -7.228954000 | -3.926492000 | 1.266541000  |
| 17 | -1.397179000 | -3.016030000 | -3.525058000 |
| 3  | -3.052459000 | -1.612848000 | -3.996362000 |

### Int-R:

The Number of Imaginary Frequencies = 0  
PBE1PBE/6-31G(d,p)/Def2-TZVPP, G = -3385.421393  
Thermal correction to Gibbs Free Energy = 0.240577  
E(M062X/6-31G(d,p)/Def2-TZVPP,CH<sub>3</sub>CN) = -3387.56466930

|    |              |              |             |
|----|--------------|--------------|-------------|
| 6  | 3.469314000  | -1.176981000 | 2.662175000 |
| 7  | 2.111160000  | 0.640691000  | 2.794162000 |
| 6  | 3.390751000  | 0.190221000  | 3.368355000 |
| 46 | 3.234747000  | 1.922485000  | 5.827723000 |
| 16 | 1.557399000  | 2.227489000  | 2.989335000 |
| 8  | 1.832786000  | 2.508525000  | 4.425713000 |
| 6  | 3.385885000  | 0.018155000  | 4.873446000 |
| 8  | 2.095875000  | 3.099136000  | 1.969669000 |
| 1  | 4.204227000  | 0.844682000  | 3.038218000 |
| 1  | 2.991748000  | -1.961425000 | 3.259211000 |
| 1  | 4.493709000  | -1.465073000 | 2.429104000 |
| 6  | -0.194336000 | 2.132480000  | 2.887701000 |
| 6  | -0.810775000 | 2.474424000  | 1.686530000 |
| 6  | -0.920859000 | 1.766184000  | 4.020050000 |
| 6  | -2.196133000 | 2.433952000  | 1.624387000 |
| 1  | -0.213016000 | 2.750985000  | 0.825988000 |
| 6  | -2.304953000 | 1.731871000  | 3.927043000 |
| 1  | -0.414375000 | 1.537043000  | 4.953077000 |
| 6  | -2.961623000 | 2.064316000  | 2.736160000 |
| 1  | -2.693049000 | 2.692352000  | 0.693623000 |
| 1  | -2.887493000 | 1.451009000  | 4.800045000 |
| 6  | 4.499968000  | -0.800228000 | 5.389565000 |
| 6  | 5.817344000  | -0.661442000 | 4.921971000 |
| 6  | 4.223059000  | -1.789807000 | 6.346159000 |
| 6  | 6.818481000  | -1.504741000 | 5.384929000 |



|    |              |              |             |
|----|--------------|--------------|-------------|
| 1  | 6.061778000  | 0.136799000  | 4.227792000 |
| 6  | 5.226874000  | -2.632475000 | 6.804637000 |
| 1  | 3.211112000  | -1.884574000 | 6.731188000 |
| 6  | 6.526752000  | -2.494519000 | 6.322368000 |
| 1  | 7.834176000  | -1.382980000 | 5.020648000 |
| 1  | 4.996085000  | -3.395946000 | 7.541574000 |
| 1  | 7.313570000  | -3.150808000 | 6.682652000 |
| 1  | 2.419618000  | -0.372287000 | 5.200716000 |
| 17 | 4.961463000  | 2.759570000  | 4.591509000 |
| 6  | 1.907782000  | 0.027073000  | 1.538889000 |
| 8  | 1.121680000  | 0.359020000  | 0.699039000 |
| 8  | 2.745839000  | -1.015409000 | 1.442878000 |
| 17 | 1.455900000  | 1.041887000  | 7.157500000 |
| 17 | 2.821404000  | 4.165314000  | 6.977962000 |
| 6  | -4.460465000 | 2.057215000  | 2.663397000 |
| 1  | -4.890842000 | 1.317786000  | 3.343772000 |
| 1  | -4.862360000 | 3.037007000  | 2.947445000 |
| 1  | -4.811236000 | 1.840626000  | 1.651054000 |
| 17 | 4.655718000  | 1.433591000  | 7.546441000 |
| 3  | 2.743210000  | 2.532542000  | 8.469056000 |

### Int-S:

The Number of Imaginary Frequencies = 0  
PBE1PBE/6-31G(d,p)/Def2-TZVPP, G = -3385.454886  
Thermal correction to Gibbs Free Energy = 0.233456  
E(M062X/6-31G(d,p)/Def2-TZVPP,CH<sub>3</sub>CN) = -3387.61671360

|    |              |              |              |
|----|--------------|--------------|--------------|
| 6  | 4.355880000  | -1.009093000 | 1.807467000  |
| 7  | 2.417581000  | 0.137083000  | 2.127087000  |
| 6  | 3.357725000  | -0.662727000 | 2.914596000  |
| 46 | 3.623252000  | 3.258144000  | 4.588445000  |
| 16 | 1.765611000  | 1.617042000  | 2.615964000  |
| 8  | 2.272256000  | 1.762668000  | 4.008628000  |
| 6  | 2.720112000  | -1.927547000 | 3.501286000  |
| 8  | 2.082378000  | 2.615897000  | 1.619899000  |
| 1  | 3.823651000  | -0.050371000 | 3.688343000  |
| 1  | 4.796539000  | -2.000653000 | 1.913875000  |
| 1  | 5.139477000  | -0.248468000 | 1.739144000  |
| 6  | 0.021080000  | 1.402389000  | 2.736539000  |
| 6  | -0.711771000 | 1.251419000  | 1.559102000  |
| 6  | -0.588230000 | 1.458443000  | 3.986135000  |
| 6  | -2.090936000 | 1.139453000  | 1.655102000  |
| 1  | -0.205820000 | 1.211046000  | 0.599418000  |
| 6  | -1.972236000 | 1.352182000  | 4.049986000  |
| 1  | 0.010337000  | 1.595801000  | 4.879344000  |
| 6  | -2.741289000 | 1.186599000  | 2.894724000  |
| 1  | -2.676596000 | 1.020020000  | 0.747571000  |
| 1  | -2.463006000 | 1.403016000  | 5.017932000  |
| 6  | 3.721452000  | -2.750918000 | 4.264636000  |
| 6  | 4.457884000  | -2.195873000 | 5.316720000  |
| 6  | 3.940234000  | -4.082457000 | 3.905859000  |
| 6  | 5.398860000  | -2.964061000 | 5.991993000  |
| 1  | 4.290941000  | -1.164545000 | 5.616337000  |
| 6  | 4.882995000  | -4.850986000 | 4.583879000  |
| 1  | 3.364871000  | -4.521526000 | 3.094073000  |
| 6  | 5.613928000  | -4.292124000 | 5.627412000  |
| 1  | 5.966967000  | -2.523022000 | 6.805479000  |
| 1  | 5.042924000  | -5.886130000 | 4.296953000  |
| 1  | 6.349763000  | -4.889446000 | 6.157798000  |
| 1  | 2.291140000  | -2.522292000 | 2.689088000  |
| 17 | 5.371348000  | 1.886947000  | 4.115131000  |
| 6  | 2.524167000  | -0.172913000 | 0.755896000  |
| 8  | 1.796593000  | 0.189885000  | -0.124835000 |
| 8  | 3.577078000  | -0.991745000 | 0.600018000  |

|    |              |              |             |
|----|--------------|--------------|-------------|
| 17 | 1.727098000  | 4.622105000  | 5.061072000 |
| 17 | 1.314603000  | -1.488768000 | 4.547464000 |
| 6  | -4.233207000 | 1.042654000  | 2.977511000 |
| 1  | -4.729407000 | 1.549340000  | 2.144919000 |
| 1  | -4.521891000 | -0.014115000 | 2.934047000 |
| 1  | -4.624478000 | 1.453088000  | 3.911700000 |
| 17 | 5.106996000  | 4.867241000  | 5.312356000 |
| 3  | 3.298029000  | 6.135987000  | 5.326062000 |

### TS<sub>rs</sub>:

The Number of Imaginary Frequencies = 1 (-199.5886 cm<sup>-1</sup>)  
PBE1PBE/6-31G(d,p)/Def2-TZVPP, G = -3385.383595  
Thermal correction to Gibbs Free Energy = 0.236417  
E(M062X/6-31G(d,p)/Def2-TZVPP,CH<sub>3</sub>CN) = -3387.55543902

|    |               |              |              |
|----|---------------|--------------|--------------|
| 6  | -5.191895000  | 6.350698000  | 0.451646000  |
| 7  | -4.157739000  | 4.335597000  | 0.362655000  |
| 6  | -5.361486000  | 4.949210000  | -0.180554000 |
| 46 | -5.997293000  | 1.655519000  | 0.740363000  |
| 16 | -3.403082000  | 3.038605000  | -0.431636000 |
| 8  | -4.015917000  | 1.787879000  | 0.078836000  |
| 6  | -6.631563000  | 4.319391000  | 0.333626000  |
| 8  | -3.494517000  | 3.367772000  | -1.841651000 |
| 1  | -5.318976000  | 4.982128000  | -1.271115000 |
| 1  | -6.136288000  | 6.826666000  | 0.715003000  |
| 1  | -4.617453000  | 7.001533000  | -0.217028000 |
| 6  | -1.740079000  | 3.010347000  | 0.110813000  |
| 6  | -0.793729000  | 3.700907000  | -0.643098000 |
| 6  | -1.397359000  | 2.261705000  | 1.236902000  |
| 6  | 0.533945000   | 3.645722000  | -0.242522000 |
| 1  | -1.092532000  | 4.249021000  | -1.530620000 |
| 6  | -0.063560000  | 2.221019000  | 1.609880000  |
| 1  | -2.161268000  | 1.732969000  | 1.797871000  |
| 6  | 0.917307000   | 2.909120000  | 0.883684000  |
| 1  | 1.287439000   | 4.175479000  | -0.818295000 |
| 1  | 0.223510000   | 1.645049000  | 2.484970000  |
| 6  | -7.923077000  | 4.837279000  | -0.026410000 |
| 6  | -8.156344000  | 5.508250000  | -1.245991000 |
| 6  | -8.973805000  | 4.720238000  | 0.904900000  |
| 6  | -9.393592000  | 6.067932000  | -1.505492000 |
| 1  | -7.373331000  | 5.560346000  | -1.996265000 |
| 6  | -10.213832000 | 5.281000000  | 0.634877000  |
| 1  | -8.802788000  | 4.175617000  | 1.828128000  |
| 6  | -10.423483000 | 5.955773000  | -0.565347000 |
| 1  | -9.570619000  | 6.580702000  | -2.445635000 |
| 1  | -11.018905000 | 5.185758000  | 1.356283000  |
| 1  | -11.396022000 | 6.389476000  | -0.779199000 |
| 1  | -6.555398000  | 3.940211000  | 1.352128000  |
| 17 | -6.752893000  | 2.401259000  | -1.313238000 |
| 6  | -3.727403000  | 4.981510000  | 1.533313000  |
| 8  | -2.887666000  | 4.634545000  | 2.307151000  |
| 8  | -4.450281000  | 6.121557000  | 1.644143000  |
| 17 | -5.195186000  | 1.427655000  | 2.936236000  |
| 17 | -5.848537000  | -1.211227000 | 0.549497000  |
| 6  | 2.357588000   | 2.831088000  | 1.296671000  |
| 1  | 2.956471000   | 3.610832000  | 0.820267000  |
| 1  | 2.463726000   | 2.928932000  | 2.380942000  |
| 1  | 2.785895000   | 1.862297000  | 1.014841000  |
| 17 | -8.108062000  | 1.399430000  | 1.561440000  |
| 3  | -6.633342000  | -0.386555000 | 2.396135000  |

**Int-T:**

The Number of Imaginary Frequencies = 0

PBE1PBE/6-31G(d,p)/Def2-TZVPP, G = -3853.055425

Thermal correction to Gibbs Free Energy = 0.237173

E(M062X/6-31G(d,p)/Def2-TZVPP,CH<sub>3</sub>CN) = -3855.40732158

|    |              |              |             |
|----|--------------|--------------|-------------|
| 6  | 3.401944000  | -1.168740000 | 2.536781000 |
| 7  | 2.074794000  | 0.652732000  | 2.795194000 |
| 6  | 3.366502000  | 0.164238000  | 3.312332000 |
| 46 | 3.184043000  | 1.789463000  | 5.871613000 |
| 16 | 1.521620000  | 2.219168000  | 3.087247000 |
| 8  | 1.728173000  | 2.377131000  | 4.561622000 |
| 6  | 3.399508000  | -0.055085000 | 4.811419000 |
| 8  | 2.105412000  | 3.175980000  | 2.174931000 |
| 1  | 4.173967000  | 0.827110000  | 2.983326000 |
| 1  | 2.884493000  | -1.969333000 | 3.075305000 |
| 1  | 4.403732000  | -1.515860000 | 2.286266000 |
| 6  | -0.225560000 | 2.150829000  | 2.921763000 |
| 6  | -0.797656000 | 2.632343000  | 1.746753000 |
| 6  | -0.992873000 | 1.665207000  | 3.979907000 |
| 6  | -2.180006000 | 2.613442000  | 1.634407000 |
| 1  | -0.168799000 | 2.995644000  | 0.942437000 |
| 6  | -2.372907000 | 1.655387000  | 3.837447000 |
| 1  | -0.520748000 | 1.325371000  | 4.896452000 |
| 6  | -2.985831000 | 2.127442000  | 2.670514000 |
| 1  | -2.642714000 | 2.978641000  | 0.722006000 |
| 1  | -2.987112000 | 1.281285000  | 4.651657000 |
| 6  | 4.583204000  | -0.782780000 | 5.329993000 |
| 6  | 5.891450000  | -0.534708000 | 4.875185000 |
| 6  | 4.401088000  | -1.744225000 | 6.342398000 |
| 6  | 6.979447000  | -1.202669000 | 5.437690000 |
| 1  | 6.065798000  | 0.214067000  | 4.110405000 |
| 6  | 5.488530000  | -2.412072000 | 6.904762000 |
| 1  | 3.397176000  | -1.948026000 | 6.702985000 |
| 6  | 6.786734000  | -2.137217000 | 6.460650000 |
| 1  | 7.980793000  | -0.991789000 | 5.076160000 |
| 1  | 5.323333000  | -3.14524000  | 7.688048000 |
| 1  | 7.636434000  | -2.649797000 | 6.900579000 |
| 1  | 2.471665000  | -0.528172000 | 5.139541000 |
| 17 | 4.845299000  | 2.750059000  | 4.636433000 |
| 6  | 1.872003000  | 0.135132000  | 1.488585000 |
| 8  | 1.095399000  | 0.551090000  | 0.677697000 |
| 8  | 2.695895000  | -0.899458000 | 1.323051000 |
| 17 | 1.486919000  | 0.757759000  | 7.191845000 |
| 17 | 2.713017000  | 3.931722000  | 7.103447000 |
| 6  | -4.480868000 | 2.141726000  | 2.545242000 |
| 1  | -4.939946000 | 1.343140000  | 3.133583000 |
| 1  | -4.886478000 | 3.092974000  | 2.909707000 |
| 1  | -4.795803000 | 2.029067000  | 1.504650000 |
| 17 | 4.663968000  | 1.313223000  | 7.554163000 |
| 3  | 2.698262000  | 2.253589000  | 8.559943000 |
| 17 | 5.160531000  | -4.135417000 | 2.880937000 |
| 3  | 5.653134000  | -3.054236000 | 4.600111000 |

**Int-U:**

The Number of Imaginary Frequencies = 0

PBE1PBE/6-31G(d,p)/Def2-TZVPP, G = -3853.059040

Thermal correction to Gibbs Free Energy = 0.233281

E(M062X/6-31G(d,p)/Def2-TZVPP,CH<sub>3</sub>CN) = -3855.45375612

|    |             |              |             |
|----|-------------|--------------|-------------|
| 6  | 4.086629000 | -0.288251000 | 2.641273000 |
| 7  | 2.153046000 | 0.964101000  | 2.635755000 |
| 6  | 3.338752000 | 0.780896000  | 3.464916000 |
| 46 | 2.857448000 | 3.826037000  | 5.421804000 |
| 16 | 1.379989000 | 2.484422000  | 2.468032000 |

|    |              |              |              |
|----|--------------|--------------|--------------|
| 8  | 1.702966000  | 3.159076000  | 3.730449000  |
| 6  | 2.973739000  | 0.428283000  | 4.905948000  |
| 8  | 1.753901000  | 3.062107000  | 1.196864000  |
| 1  | 3.925488000  | 1.711446000  | 3.529036000  |
| 1  | 4.409970000  | -1.141279000 | 3.239814000  |
| 1  | 4.943756000  | 0.147120000  | 2.118286000  |
| 6  | -0.345185000 | 2.141879000  | 2.507922000  |
| 6  | -1.010157000 | 1.897700000  | 1.307533000  |
| 6  | -1.011846000 | 2.171708000  | 3.732102000  |
| 6  | -2.377166000 | 1.663034000  | 1.348784000  |
| 1  | -0.462890000 | 1.880111000  | 0.372706000  |
| 6  | -2.379437000 | 1.934307000  | 3.741889000  |
| 1  | -0.481724000 | 2.408543000  | 4.650584000  |
| 6  | -3.080731000 | 1.676892000  | 2.558509000  |
| 1  | -2.908942000 | 1.466196000  | 0.422094000  |
| 1  | -2.912759000 | 1.960896000  | 4.688104000  |
| 6  | 4.069205000  | 0.519974000  | 5.935398000  |
| 6  | 5.373847000  | 0.060896000  | 5.689267000  |
| 6  | 3.712137000  | 0.870333000  | 7.246138000  |
| 6  | 6.276807000  | -0.101858000 | 6.744156000  |
| 1  | 5.694563000  | -0.194523000 | 4.685751000  |
| 6  | 4.616235000  | 0.717655000  | 8.302356000  |
| 1  | 2.709002000  | 1.220166000  | 7.484893000  |
| 6  | 5.893791000  | 0.205209000  | 8.055654000  |
| 1  | 7.277411000  | -0.470396000 | 6.539527000  |
| 1  | 4.267518000  | 1.001255000  | 9.295713000  |
| 1  | 6.593747000  | 0.065640000  | 8.873766000  |
| 1  | 2.130763000  | 1.049171000  | 5.217635000  |
| 17 | 4.805318000  | 3.802368000  | 4.219184000  |
| 6  | 2.103100000  | 0.049292000  | 1.574514000  |
| 8  | 1.265835000  | -0.019225000 | 0.722069000  |
| 8  | 3.161546000  | -0.776407000 | 1.677045000  |
| 17 | 0.861860000  | 3.675750000  | 6.624328000  |
| 17 | 2.108510000  | 1.965964000  | 10.051031000 |
| 6  | -4.564993000 | 1.456375000  | 2.583020000  |
| 1  | -4.882788000 | 0.977105000  | 3.512740000  |
| 1  | -5.095827000 | 2.412979000  | 2.510660000  |
| 1  | -4.891884000 | 0.835694000  | 1.744772000  |
| 17 | 3.953306000  | 4.436480000  | 7.306828000  |
| 3  | 2.127832000  | 3.611466000  | 8.612890000  |
| 17 | 2.333642000  | -1.300114000 | 5.050103000  |
| 3  | 4.176964000  | -1.331244000 | 7.153885000  |

**TS<sub>TU</sub>:**The Number of Imaginary Frequencies = 1 (-218.0154 cm<sup>-1</sup>)

PBE1PBE/6-31G(d,p)/Def2-TZVPP, G = -3853.017144

Thermal correction to Gibbs Free Energy = 0.235670

E(M062X/6-31G(d,p)/Def2-TZVPP,CH<sub>3</sub>CN) = -3855.41120757

|    |              |              |             |
|----|--------------|--------------|-------------|
| 6  | 4.232895000  | -0.383994000 | 1.897369000 |
| 7  | 2.323745000  | 0.767970000  | 2.508228000 |
| 6  | 3.581319000  | 0.335258000  | 3.102148000 |
| 46 | 3.334391000  | 1.953562000  | 5.916002000 |
| 16 | 1.635908000  | 2.281435000  | 2.913871000 |
| 8  | 2.030310000  | 2.468637000  | 4.319983000 |
| 6  | 3.355231000  | -0.439014000 | 4.373902000 |
| 8  | 2.014156000  | 3.252703000  | 1.911314000 |
| 1  | 4.213065000  | 1.197113000  | 3.383386000 |
| 1  | 4.603629000  | -1.377380000 | 2.147176000 |
| 1  | 5.033601000  | 0.228406000  | 1.470273000 |
| 6  | -0.105198000 | 2.040047000  | 2.910369000 |
| 6  | -0.814631000 | 2.298156000  | 1.738630000 |
| 6  | -0.737188000 | 1.658651000  | 4.092494000 |
| 6  | -2.193539000 | 2.150923000  | 1.758832000 |

|    |              |              |             |    |              |              |              |
|----|--------------|--------------|-------------|----|--------------|--------------|--------------|
| 1  | -0.291880000 | 2.593594000  | 0.836891000 | 1  | -5.958410000 | 4.699361000  | 0.466375000  |
| 6  | -2.118512000 | 1.519508000  | 4.082043000 | 1  | -7.108282000 | 3.494894000  | 1.054859000  |
| 1  | -0.166211000 | 1.499505000  | 5.002896000 | 8  | -2.449703000 | -0.806655000 | -1.871893000 |
| 6  | -2.864897000 | 1.762293000  | 2.924098000 | 6  | 0.449501000  | 1.779870000  | 0.206626000  |
| 1  | -2.760765000 | 2.342819000  | 0.852318000 | 6  | 1.098870000  | 2.286844000  | 1.332050000  |
| 1  | -2.626554000 | 1.227728000  | 4.996958000 | 6  | -0.240904000 | 2.658406000  | -0.630775000 |
| 6  | 4.452915000  | -0.916227000 | 5.218771000 | 6  | 1.063188000  | 3.649588000  | 1.615886000  |
| 6  | 5.772894000  | -1.011895000 | 4.743166000 | 1  | 1.636444000  | 1.605947000  | 1.986498000  |
| 6  | 4.129227000  | -1.528812000 | 6.449860000 | 6  | -0.283457000 | 4.019472000  | -0.346160000 |
| 6  | 6.718050000  | -1.776929000 | 5.430115000 | 1  | -0.756796000 | 2.276980000  | -1.508728000 |
| 1  | 6.066457000  | -0.497119000 | 3.834912000 | 6  | 0.369467000  | 4.519179000  | 0.778337000  |
| 6  | 5.071399000  | -2.298392000 | 7.123384000 | 1  | 1.576251000  | 4.031011000  | 2.494269000  |
| 1  | 3.123395000  | -1.410116000 | 6.842896000 | 1  | -0.827025000 | 4.690577000  | -1.005025000 |
| 6  | 6.364789000  | -2.450132000 | 6.602247000 | 1  | 0.339295000  | 5.582423000  | 0.999405000  |
| 1  | 7.730175000  | -1.850196000 | 5.044670000 | 46 | 3.390610000  | -0.116291000 | -0.734095000 |
| 1  | 4.801664000  | -2.777727000 | 8.059286000 | 17 | 2.906784000  | -2.035361000 | 0.529296000  |
| 1  | 7.096470000  | -3.058484000 | 7.124291000 | 17 | 3.857573000  | 1.777480000  | -2.113170000 |
| 1  | 2.385484000  | -0.329967000 | 4.848869000 | 1  | -3.461285000 | -1.473065000 | -3.085492000 |
| 17 | 5.171038000  | 2.710723000  | 4.772459000 | 8  | -4.053703000 | -1.838617000 | -3.786060000 |
| 6  | 2.162880000  | 0.266451000  | 1.205792000 | 6  | -5.318508000 | -1.780752000 | -3.387949000 |
| 8  | 1.253800000  | 0.488085000  | 0.460074000 | 8  | -5.685312000 | -1.357717000 | -2.309471000 |
| 8  | 3.208643000  | -0.532022000 | 0.925211000 | 6  | -6.254788000 | -2.308678000 | -4.442423000 |
| 17 | 1.511764000  | 0.882471000  | 7.013626000 | 1  | -6.142207000 | -1.728518000 | -5.362630000 |
| 17 | 2.553527000  | 4.294548000  | 7.341096000 | 1  | -5.998223000 | -3.344539000 | -4.681739000 |
| 6  | -4.361072000 | 1.644891000  | 2.939527000 | 1  | -7.282579000 | -2.250691000 | -4.086615000 |
| 1  | -4.698615000 | 0.924201000  | 3.688829000 | 6  | -0.635595000 | -4.494426000 | 3.540323000  |
| 1  | -4.818550000 | 2.610919000  | 3.183876000 | 1  | -1.551744000 | -3.912209000 | 3.431176000  |
| 1  | -4.748517000 | 1.336944000  | 1.964699000 | 1  | -0.798449000 | -5.512690000 | 3.182995000  |
| 17 | 4.642572000  | 1.382708000  | 7.703497000 | 1  | -0.323592000 | -4.511354000 | 4.585993000  |
| 3  | 2.621363000  | 2.452237000  | 8.471601000 | 6  | 0.661012000  | -2.457347000 | 3.207124000  |
| 17 | 2.725977000  | -2.526437000 | 3.606980000 | 1  | 0.944940000  | -2.504646000 | 4.260145000  |
| 3  | 4.540364000  | -3.137491000 | 4.838254000 | 1  | 1.466465000  | -2.023625000 | 2.608372000  |

### Int-V:

The Number of Imaginary Frequencies = 0

PBE1PBE/6-31G(d,p)/Def2-TZVPP, G = -3368.207509

Thermal correction to Gibbs Free Energy = 0.440939

E(M062X/6-31G(d,p)/Def2-TZVPP,CH<sub>3</sub>CN) = -3370.89203276

|    |              |              |              |
|----|--------------|--------------|--------------|
| 6  | 1.458993000  | 0.042567000  | -1.313648000 |
| 6  | 0.542806000  | 0.303401000  | -0.113090000 |
| 7  | -0.809924000 | -0.285068000 | -0.386667000 |
| 6  | -1.258189000 | -0.704897000 | -1.629186000 |
| 8  | -0.346492000 | -1.004346000 | -2.535851000 |
| 6  | 1.025321000  | -1.177407000 | -2.069371000 |
| 1  | 1.413905000  | 0.898836000  | -1.993254000 |
| 1  | 1.065449000  | -2.088504000 | -1.466310000 |
| 1  | 1.604515000  | -1.323370000 | -2.980839000 |
| 1  | 0.924921000  | -0.229180000 | 0.757572000  |
| 16 | -1.923989000 | -0.416001000 | 0.911322000  |
| 8  | -1.133941000 | -0.039524000 | 2.082486000  |
| 8  | -2.493781000 | -1.760688000 | 0.862391000  |
| 6  | -3.204217000 | 0.779013000  | 0.692375000  |
| 6  | -4.353410000 | 0.446626000  | -0.022348000 |
| 6  | -3.039126000 | 2.031246000  | 1.282791000  |
| 6  | -5.351581000 | 1.403269000  | -0.145673000 |
| 1  | -4.466603000 | -0.519393000 | -0.500505000 |
| 6  | -4.055342000 | 2.968086000  | 1.145433000  |
| 1  | -2.134865000 | 2.261132000  | 1.836291000  |
| 6  | -5.222380000 | 2.670454000  | 0.433509000  |
| 1  | -6.241018000 | 1.149875000  | -0.716040000 |
| 1  | -3.937198000 | 3.949331000  | 1.597391000  |
| 6  | -6.325769000 | 3.681708000  | 0.309776000  |
| 1  | -6.799136000 | 3.634211000  | -0.675029000 |

### TS<sub>cv</sub>:

The Number of Imaginary Frequencies = 1 (-213.0251 cm<sup>-1</sup>)

PBE1PBE/6-31G(d,p)/Def2-TZVPP, G = -3368.178284

Thermal correction to Gibbs Free Energy = 0.441012

E(M062X/6-31G(d,p)/Def2-TZVPP,CH<sub>3</sub>CN) = -3370.85633165

|    |              |              |              |
|----|--------------|--------------|--------------|
| 6  | -1.377704000 | -0.042516000 | 1.363464000  |
| 6  | -1.057682000 | 0.573152000  | 0.112457000  |
| 7  | 1.002650000  | -0.159315000 | 0.028931000  |
| 6  | 1.549461000  | -0.617233000 | 1.183314000  |
| 8  | 0.666419000  | -1.097825000 | 2.083154000  |
| 6  | -0.687561000 | -1.346118000 | 1.667252000  |
| 1  | -1.341834000 | 0.624282000  | 2.225446000  |
| 1  | -0.697415000 | -2.014548000 | 0.806079000  |
| 1  | -1.146433000 | -1.851068000 | 2.518253000  |
| 1  | -1.143638000 | -0.033529000 | -0.779195000 |
| 16 | 1.980260000  | 0.180634000  | -1.238929000 |
| 8  | 1.068026000  | 0.687222000  | -2.279724000 |
| 8  | 2.768530000  | -1.013093000 | -1.596412000 |

|    |              |              |              |    |              |              |              |
|----|--------------|--------------|--------------|----|--------------|--------------|--------------|
| 6  | 3.093847000  | 1.497378000  | -0.825338000 | 6  | 0.280997000  | 0.211646000  | -0.655843000 |
| 6  | 4.301150000  | 1.220117000  | -0.187376000 | 7  | -0.650958000 | -0.881601000 | -0.485890000 |
| 6  | 2.720081000  | 2.802159000  | -1.139468000 | 6  | -1.672270000 | -3.513830000 | -1.465708000 |
| 6  | 5.140177000  | 2.277548000  | 0.138326000  | 8  | -0.692704000 | -4.090898000 | -1.211867000 |
| 1  | 4.573851000  | 0.208636000  | 0.087140000  | 6  | 1.440668000  | -1.355307000 | -2.344979000 |
| 6  | 3.579448000  | 3.843584000  | -0.809192000 | 1  | 1.457593000  | 0.772796000  | -2.442738000 |
| 1  | 1.774199000  | 2.989373000  | -1.637389000 | 1  | 1.014413000  | -2.213515000 | -1.835191000 |
| 6  | 4.798538000  | 3.598723000  | -0.169303000 | 1  | 1.783773000  | -1.478095000 | -3.369410000 |
| 1  | 6.069727000  | 2.056654000  | 0.655958000  | 1  | 0.916335000  | 0.337280000  | 0.237398000  |
| 1  | 3.296910000  | 4.865199000  | -1.051309000 | 16 | -1.298403000 | -1.009847000 | 0.939344000  |
| 6  | 5.732518000  | 4.726556000  | 0.167181000  | 8  | -0.442358000 | -0.536757000 | 2.061243000  |
| 1  | 6.189264000  | 4.583403000  | 1.151008000  | 8  | -1.799151000 | -2.409461000 | 1.081710000  |
| 1  | 5.216498000  | 5.690576000  | 0.166057000  | 6  | -2.780128000 | -0.006762000 | 1.072026000  |
| 1  | 6.549278000  | 4.788139000  | -0.561853000 | 6  | -3.976836000 | -0.458019000 | 0.520372000  |
| 8  | 2.739673000  | -0.627274000 | 1.475700000  | 6  | -2.712235000 | 1.250074000  | 1.666947000  |
| 6  | -1.019581000 | 2.017075000  | -0.104190000 | 6  | -5.104826000 | 0.353905000  | 0.568778000  |
| 6  | -1.246426000 | 2.512330000  | -1.397243000 | 1  | -4.031178000 | -1.441910000 | 0.065944000  |
| 6  | -0.753959000 | 2.922254000  | 0.934130000  | 6  | -3.846405000 | 2.053860000  | 1.705422000  |
| 6  | -1.236834000 | 3.879206000  | -1.641978000 | 1  | -1.774162000 | 1.584288000  | 2.097145000  |
| 1  | -1.422889000 | 1.811406000  | -2.206174000 | 6  | -5.058095000 | 1.620836000  | 1.160183000  |
| 6  | -0.728340000 | 4.286868000  | 0.684920000  | 1  | -6.031122000 | -0.007997000 | 0.129455000  |
| 1  | -0.554283000 | 2.554561000  | 1.934971000  | 1  | -3.788322000 | 3.037425000  | 2.166241000  |
| 6  | -0.976085000 | 4.768005000  | -0.600409000 | 6  | -6.288679000 | 2.481548000  | 1.233728000  |
| 1  | -1.424656000 | 4.252036000  | -2.644387000 | 1  | -6.963500000 | 2.286040000  | 0.395153000  |
| 1  | -0.514984000 | 4.978950000  | 1.493734000  | 1  | -6.034323000 | 3.545599000  | 1.226732000  |
| 1  | -0.960636000 | 5.837588000  | -0.790837000 | 1  | -6.852199000 | 2.287468000  | 2.154635000  |
| 46 | -3.374749000 | -0.224480000 | 0.843719000  | 8  | -2.680390000 | -3.032156000 | -1.801953000 |
| 17 | -2.954204000 | -1.992421000 | -0.608921000 | 6  | -0.363758000 | 1.570125000  | -0.933909000 |
| 17 | -3.811660000 | 1.557022000  | 2.363839000  | 6  | 0.180536000  | 2.732233000  | -0.384992000 |
| 1  | 3.804583000  | -1.054185000 | 2.692965000  | 6  | -1.482075000 | 1.671004000  | -1.764128000 |
| 8  | 4.447160000  | -1.290173000 | 3.410488000  | 6  | -0.382125000 | 3.977742000  | -0.656119000 |
| 6  | 5.681878000  | -0.970194000 | 3.047643000  | 1  | 1.044681000  | 2.658176000  | 0.272381000  |
| 8  | 5.987650000  | -0.474161000 | 1.981414000  | 6  | -2.041553000 | 2.914790000  | -2.038571000 |
| 6  | 6.67756000   | -1.299947000 | 4.130017000  | 1  | -1.926496000 | 0.766923000  | -2.169235000 |
| 1  | 6.430916000  | -0.748299000 | 5.041686000  | 6  | -1.495282000 | 4.071984000  | -1.486449000 |
| 1  | 6.623961000  | -2.364728000 | 4.373765000  | 1  | 0.045779000  | 4.873091000  | -0.212757000 |
| 1  | 7.682899000  | -1.042317000 | 3.798439000  | 1  | -2.911733000 | 2.980576000  | -2.686773000 |
| 6  | 1.487985000  | -3.122138000 | -3.757004000 | 1  | -1.938168000 | 5.041466000  | -1.698182000 |
| 1  | 2.084244000  | -2.324163000 | -3.305207000 | 46 | 3.276249000  | -0.771804000 | -1.410086000 |
| 1  | 1.966247000  | -4.088564000 | -3.586567000 | 17 | 2.741153000  | -2.036398000 | 0.393493000  |
| 1  | 1.355216000  | -2.954876000 | -4.827310000 | 17 | 3.903321000  | 0.441568000  | -3.380802000 |
| 6  | -0.549830000 | -1.833259000 | -3.381004000 | 1  | -3.483628000 | -1.444474000 | -2.611838000 |
| 1  | -0.724929000 | -1.769255000 | -4.456808000 | 8  | -3.800179000 | -0.643774000 | -3.064914000 |
| 1  | -1.495505000 | -1.824297000 | -2.833250000 | 6  | -5.111354000 | -0.521032000 | -2.819391000 |
| 1  | 0.083585000  | -1.003866000 | -3.051577000 | 8  | -5.755574000 | -1.346718000 | -2.212971000 |
| 6  | -0.683788000 | -4.247661000 | -3.627323000 | 6  | -5.653707000 | 0.772427000  | -3.355844000 |
| 1  | -0.183691000 | -5.194413000 | -3.416826000 | 1  | -5.355378000 | 1.576120000  | -2.674047000 |
| 1  | -1.656807000 | -4.220760000 | -3.133723000 | 1  | -5.236210000 | 0.996476000  | -4.339773000 |
| 1  | -0.808413000 | -4.123689000 | -4.704321000 | 1  | -6.741308000 | 0.725531000  | -3.398700000 |
| 7  | 0.146124000  | -3.130396000 | -3.102446000 | 6  | -0.907171000 | -3.995616000 | 3.637604000  |
| 6  | 0.325664000  | -3.304042000 | -1.626499000 | 1  | -1.417203000 | -3.275607000 | 2.989100000  |
| 1  | -0.654217000 | -3.228545000 | -1.150101000 | 1  | -1.359353000 | -4.983286000 | 3.526267000  |
| 1  | 0.772004000  | -4.284394000 | -1.449345000 | 1  | -0.938932000 | -3.685953000 | 4.683698000  |
| 1  | 0.992725000  | -2.519191000 | -1.266485000 | 6  | 1.182180000  | -2.753866000 | 3.442956000  |
| 17 | -5.770456000 | -0.492748000 | 0.351791000  | 1  | 1.171690000  | -2.560140000 | 4.517649000  |
| 3  | -5.882367000 | 1.183303000  | 1.719644000  | 1  | 2.207430000  | -2.805879000 | 3.074654000  |
|    |              |              |              | 1  | 0.631318000  | -1.971798000 | 2.904930000  |
|    |              |              |              | 6  | 1.229105000  | -5.128629000 | 3.979949000  |
|    |              |              |              | 1  | 0.749308000  | -6.092049000 | 3.799080000  |
|    |              |              |              | 1  | 2.269753000  | -5.165893000 | 3.654215000  |
|    |              |              |              | 1  | 1.182227000  | -4.883964000 | 5.042541000  |
|    |              |              |              | 7  | 0.521570000  | -4.077315000 | 3.206489000  |
|    |              |              |              | 6  | 0.565028000  | -4.409528000 | 1.746860000  |

**Int-X:**

The Number of Imaginary Frequencies = 0

PBE1PBE/6-31G(d,p)/Def2-TZVPP, G = -3368.173306

Thermal correction to Gibbs Free Energy = 0.432409

E(M062X/6-31G(d,p)/Def2-TZVPP,CH<sub>3</sub>CN) = -3370.84878287

6 1.196294000 -0.089977000 -1.832872000

|    |              |              |              |   |              |             |              |
|----|--------------|--------------|--------------|---|--------------|-------------|--------------|
| 1  | 1.602206000  | -4.398099000 | 1.411747000  | 1 | -2.379558000 | 4.906205000 | -0.716416000 |
| 1  | 0.124570000  | -5.399163000 | 1.609889000  | 1 | -2.092792000 | 4.960259000 | -2.484865000 |
| 1  | -0.019481000 | -3.662691000 | 1.205740000  | 6 | 0.132720000  | 3.476791000 | -2.481483000 |
| 17 | 5.543935000  | -0.675590000 | -0.587062000 | 1 | -0.053682000 | 4.029001000 | -3.404526000 |
| 3  | 5.883201000  | 0.471150000  | -2.411974000 | 1 | 1.202868000  | 3.361154000 | -2.306237000 |

### TS<sub>vx</sub>:

The Number of Imaginary Frequencies = 1 (-376.1913 cm<sup>-1</sup>)

PBE1PBE/6-31G(d,p)/Def2-TZVPP, G = -3368.171925

Thermal correction to Gibbs Free Energy = 0.444053

E(M062X/6-31G(d,p)/Def2-TZVPP,CH<sub>3</sub>CN) = -3370.85093243

|    |              |              |              |    |              |              |              |
|----|--------------|--------------|--------------|----|--------------|--------------|--------------|
| 6  | 1.888511000  | -0.951987000 | 0.836302000  | 1  | -0.285206000 | 6.167657000  | -0.475231000 |
| 6  | 0.801153000  | -1.237690000 | -0.199092000 | 1  | 1.241476000  | 5.465125000  | -1.084778000 |
| 7  | -0.376957000 | -0.360655000 | 0.011438000  | 1  | 0.031804000  | 6.105215000  | -2.232696000 |
| 6  | -0.858196000 | 0.079341000  | 1.281661000  | 7  | -0.461662000 | 4.251796000  | -1.346841000 |
| 8  | -0.136481000 | -0.125120000 | 2.298561000  | 6  | -0.225700000 | 3.524895000  | -0.052420000 |
| 6  | 1.758132000  | 0.168215000  | 1.677509000  | 1  | 0.835085000  | 3.275524000  | 0.013276000  |
| 1  | 2.219340000  | -1.857117000 | 1.340598000  | 1  | -0.531011000 | 4.179707000  | 0.765684000  |
| 1  | 1.425128000  | 1.120657000  | 1.287243000  | 1  | -0.832264000 | 2.617508000  | -0.057292000 |
| 1  | 2.224866000  | 0.170936000  | 2.656760000  | 17 | 5.825617000  | 0.896283000  | -0.496237000 |
| 1  | 1.169107000  | -1.003922000 | -1.198627000 | 3  | 6.555424000  | -0.543095000 | 0.949905000  |
| 16 | -1.418242000 | -0.170848000 | -1.321365000 |    |              |              |              |
| 8  | -0.720974000 | -0.808565000 | -2.429773000 |    |              |              |              |
| 8  | -1.793027000 | 1.241187000  | -1.453572000 |    |              |              |              |
| 6  | -2.909680000 | -1.073346000 | -0.998392000 |    |              |              |              |
| 6  | -4.032995000 | -0.402864000 | -0.512843000 |    |              |              |              |
| 6  | -2.939152000 | -2.431799000 | -1.296735000 |    |              |              |              |
| 6  | -5.202463000 | -1.126450000 | -0.329320000 |    |              |              |              |
| 1  | -3.980682000 | 0.654634000  | -0.269345000 |    |              |              |              |
| 6  | -4.122476000 | -3.134693000 | -1.094819000 |    |              |              |              |
| 1  | -2.056196000 | -2.928871000 | -1.685257000 |    |              |              |              |
| 6  | -5.266997000 | -2.497061000 | -0.611741000 |    |              |              |              |
| 1  | -6.085362000 | -0.615071000 | 0.046660000  |    |              |              |              |
| 1  | -4.154511000 | -4.196934000 | -1.321722000 |    |              |              |              |
| 6  | -6.546358000 | -3.254430000 | -0.395863000 |    |              |              |              |
| 1  | -7.380360000 | -2.776727000 | -0.920688000 |    |              |              |              |
| 1  | -6.810177000 | -3.283107000 | 0.667282000  |    |              |              |              |
| 1  | -6.469308000 | -4.285575000 | -0.749716000 |    |              |              |              |
| 8  | -1.958134000 | 0.659636000  | 1.246169000  |    |              |              |              |
| 6  | 0.421390000  | -2.709246000 | -0.157132000 |    |              |              |              |
| 6  | 0.699089000  | -3.525372000 | -1.254335000 |    |              |              |              |
| 6  | -0.207588000 | -3.262891000 | 0.963968000  |    |              |              |              |
| 6  | 0.354198000  | -4.875780000 | -1.236645000 |    |              |              |              |
| 1  | 1.169017000  | -3.092629000 | -2.133353000 |    |              |              |              |
| 6  | -0.557014000 | -4.609001000 | 0.977646000  |    |              |              |              |
| 1  | -0.424003000 | -2.632439000 | 1.822844000  |    |              |              |              |
| 6  | -0.277147000 | -5.419162000 | -0.121635000 |    |              |              |              |
| 1  | 0.573805000  | -5.499974000 | -2.098402000 |    |              |              |              |
| 1  | -1.049372000 | -5.027861000 | 1.850805000  |    |              |              |              |
| 1  | -0.549883000 | -6.470790000 | -0.107595000 |    |              |              |              |
| 46 | 3.670080000  | -0.013909000 | 0.285685000  |    |              |              |              |
| 17 | 2.576162000  | 1.375674000  | -1.179987000 |    |              |              |              |
| 17 | 4.760437000  | -1.424368000 | 1.875680000  |    |              |              |              |
| 1  | -2.792413000 | 1.446080000  | 2.325704000  |    |              |              |              |
| 8  | -3.395120000 | 1.946780000  | 2.957869000  |    |              |              |              |
| 6  | -4.273030000 | 2.670297000  | 2.287569000  |    |              |              |              |
| 8  | -4.322755000 | 2.762699000  | 1.073089000  |    |              |              |              |
| 6  | -5.232431000 | 3.382246000  | 3.209035000  |    |              |              |              |
| 1  | -5.836505000 | 2.644261000  | 3.745454000  |    |              |              |              |
| 1  | -4.682392000 | 3.952864000  | 3.962233000  |    |              |              |              |
| 1  | -5.883161000 | 4.040329000  | 2.633928000  |    |              |              |              |
| 6  | -1.935152000 | 4.389126000  | -1.568148000 |    |              |              |              |
| 1  | -2.362957000 | 3.388466000  | -1.654617000 |    |              |              |              |

## 12. Copies of NMR Spectra

$^1\text{H}$  NMR (300 MHz,  $\text{CDCl}_3$ ) of substrate **8b**

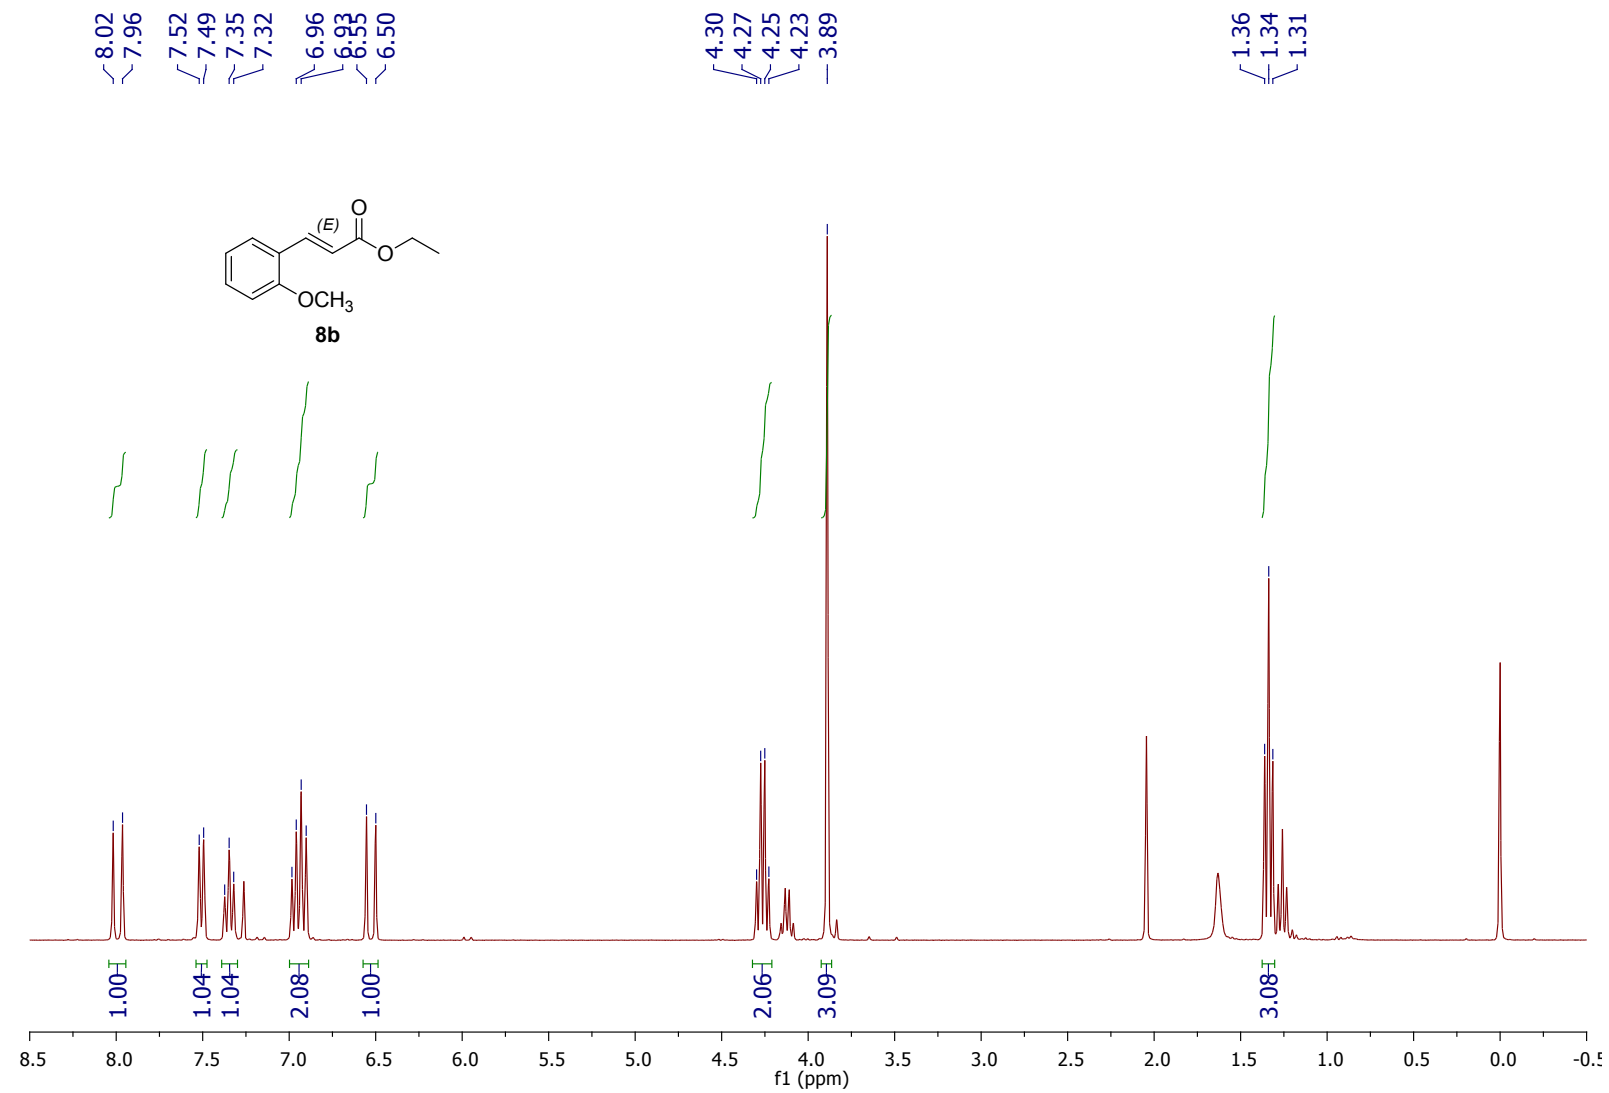

<sup>13</sup>C NMR (75 MHz, CDCl<sub>3</sub>) of substrate **8b**

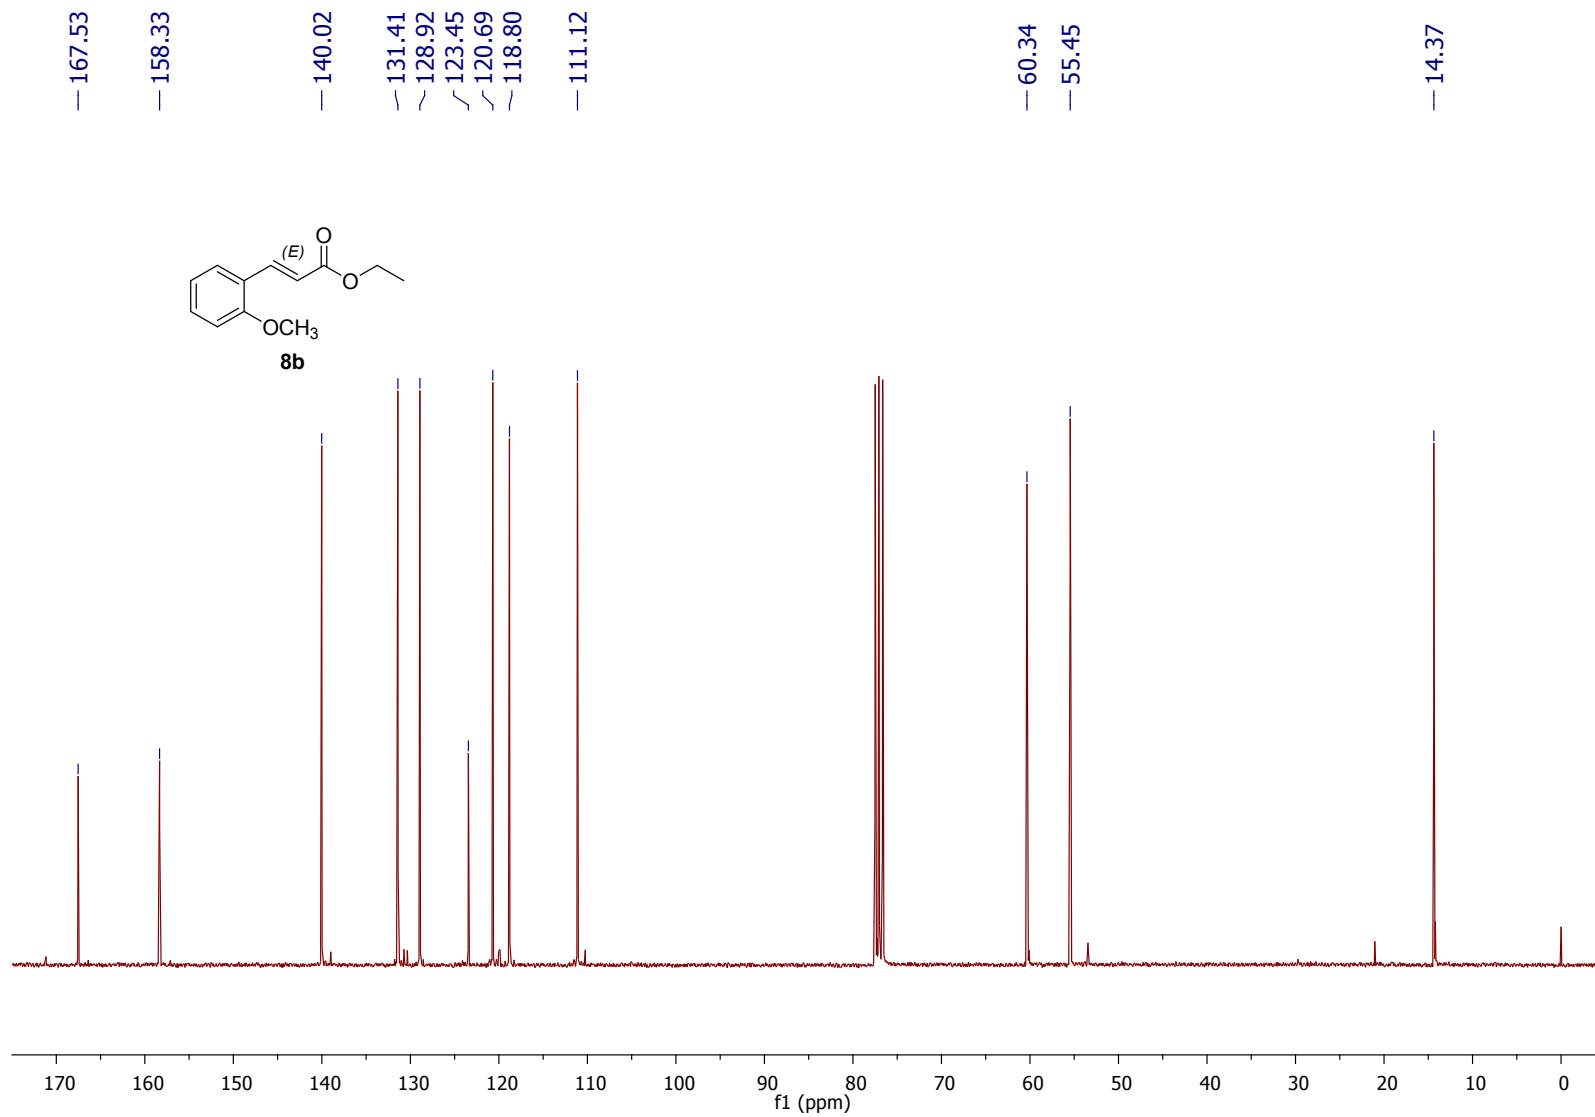

<sup>1</sup>H NMR (300 MHz, CDCl<sub>3</sub>) of substrate **8c**

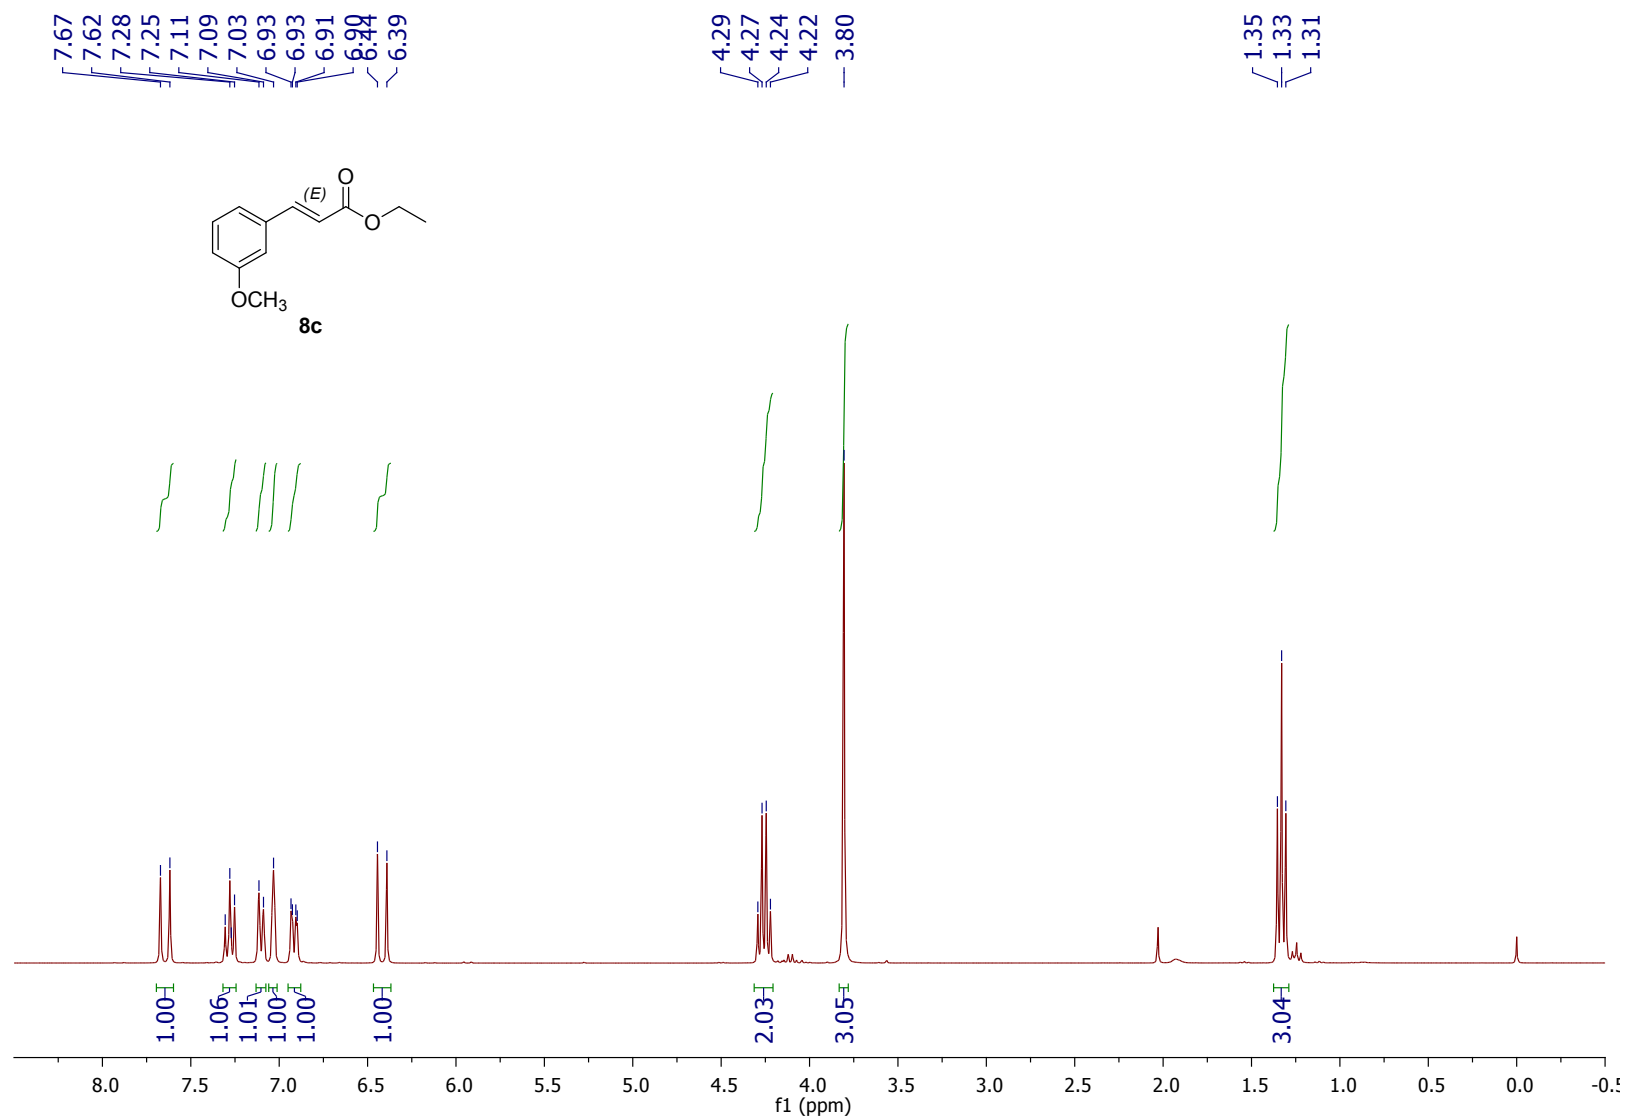



<sup>13</sup>C NMR (75 MHz, CDCl<sub>3</sub>) of substrate **8c**

— 166.91  
— 159.92  
— 144.50  
— 135.85  
— 129.87  
— 120.74  
— 118.58  
— 116.10  
— 112.93  
— 60.50  
— 55.25  
— 14.33

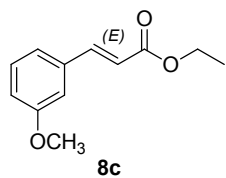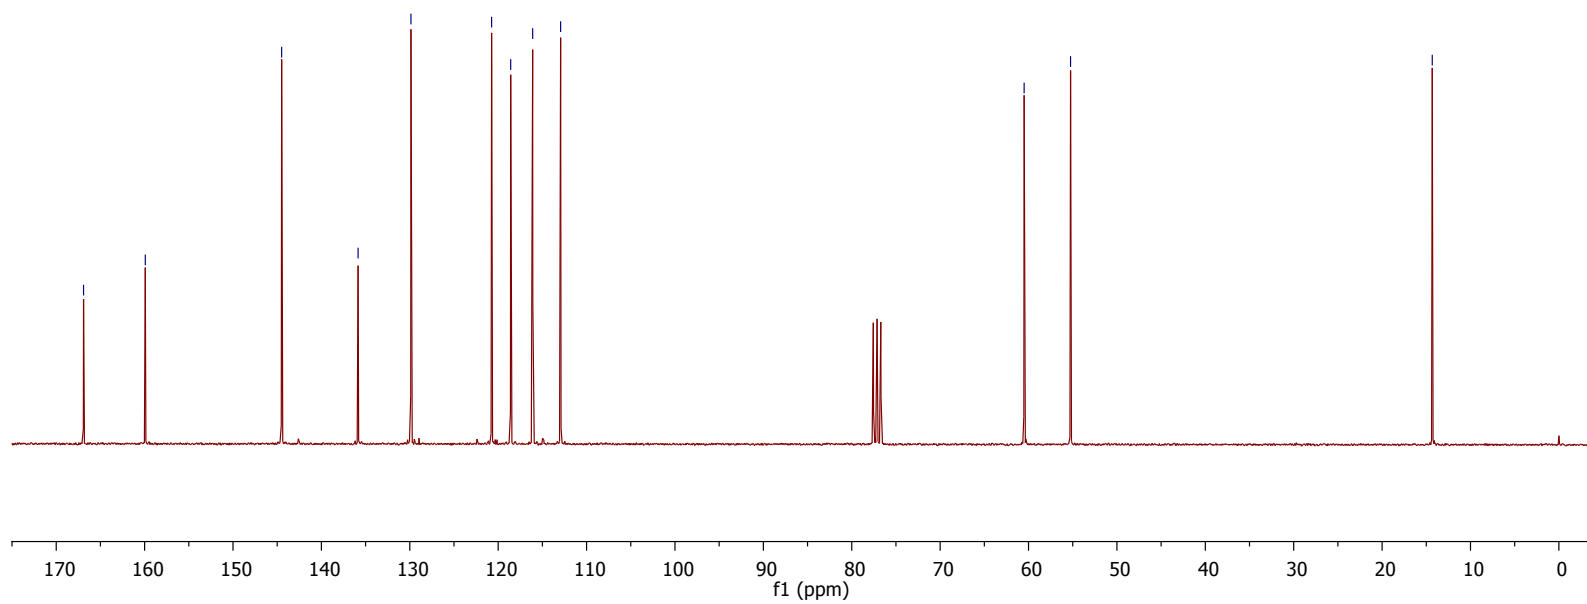

<sup>1</sup>H NMR (300 MHz, CDCl<sub>3</sub>) of substrate **8d**

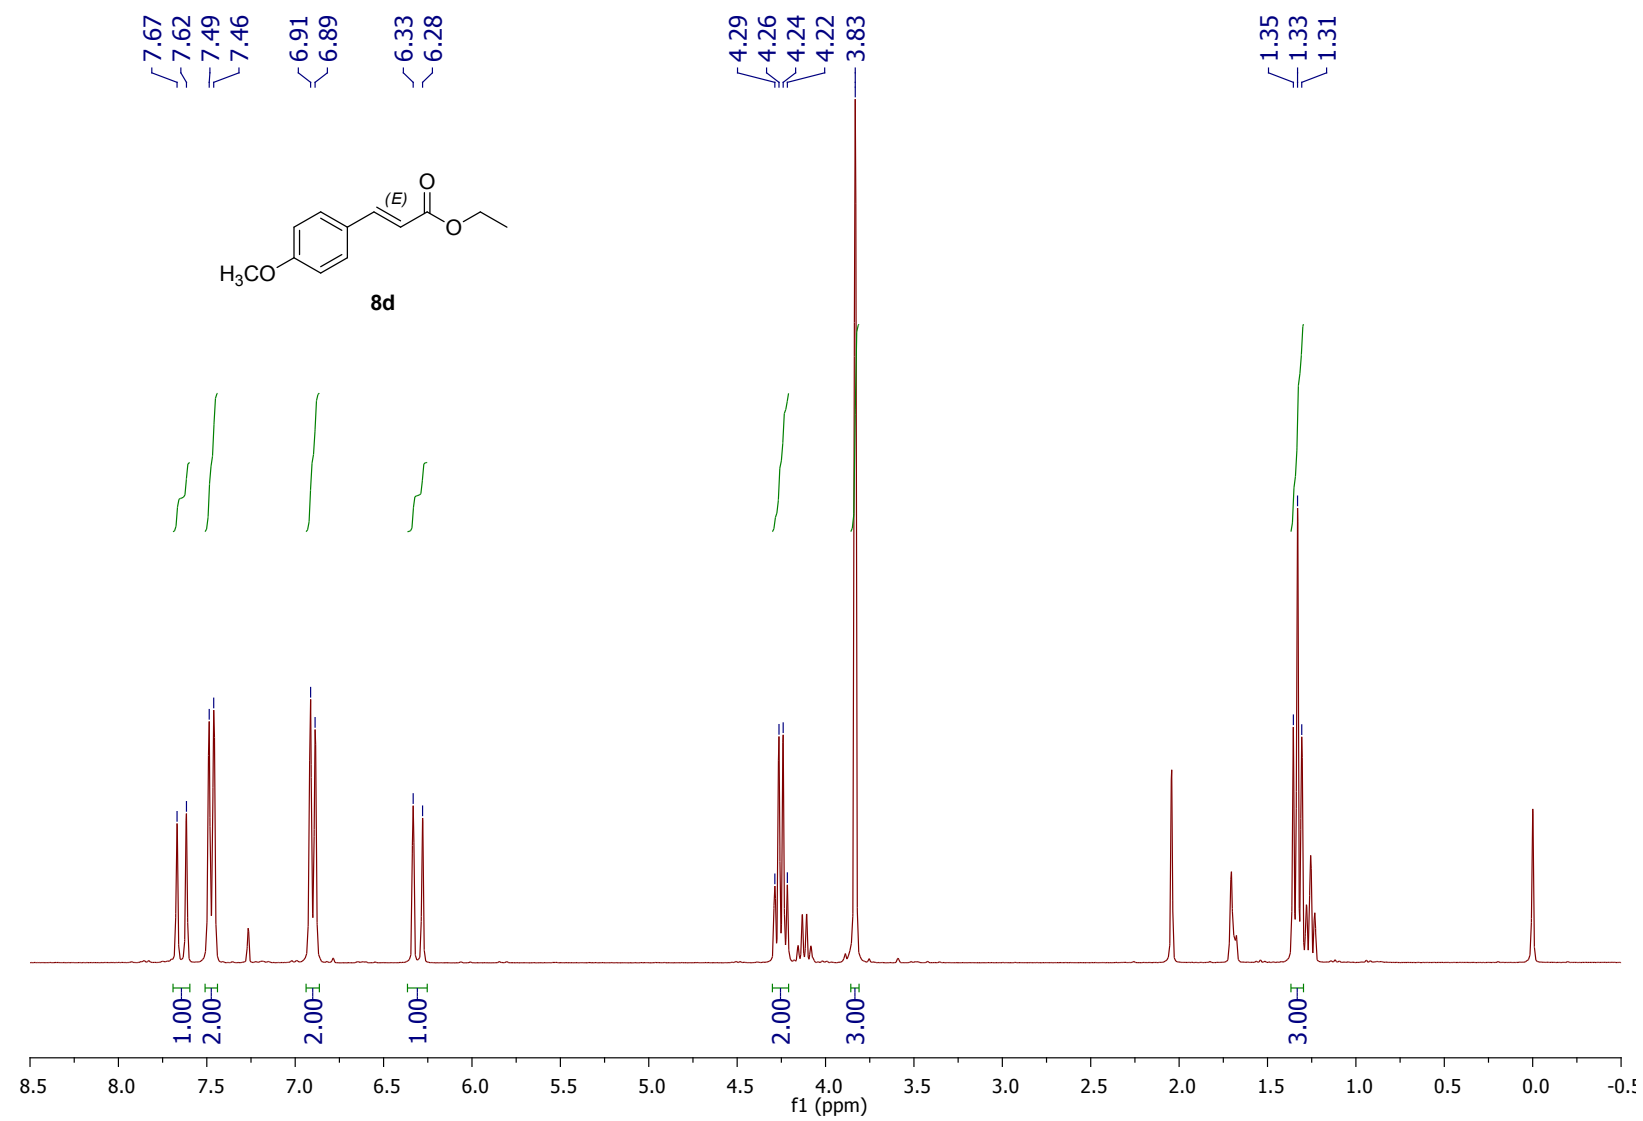

<sup>13</sup>C NMR (75 MHz, CDCl<sub>3</sub>) of substrate **8d**

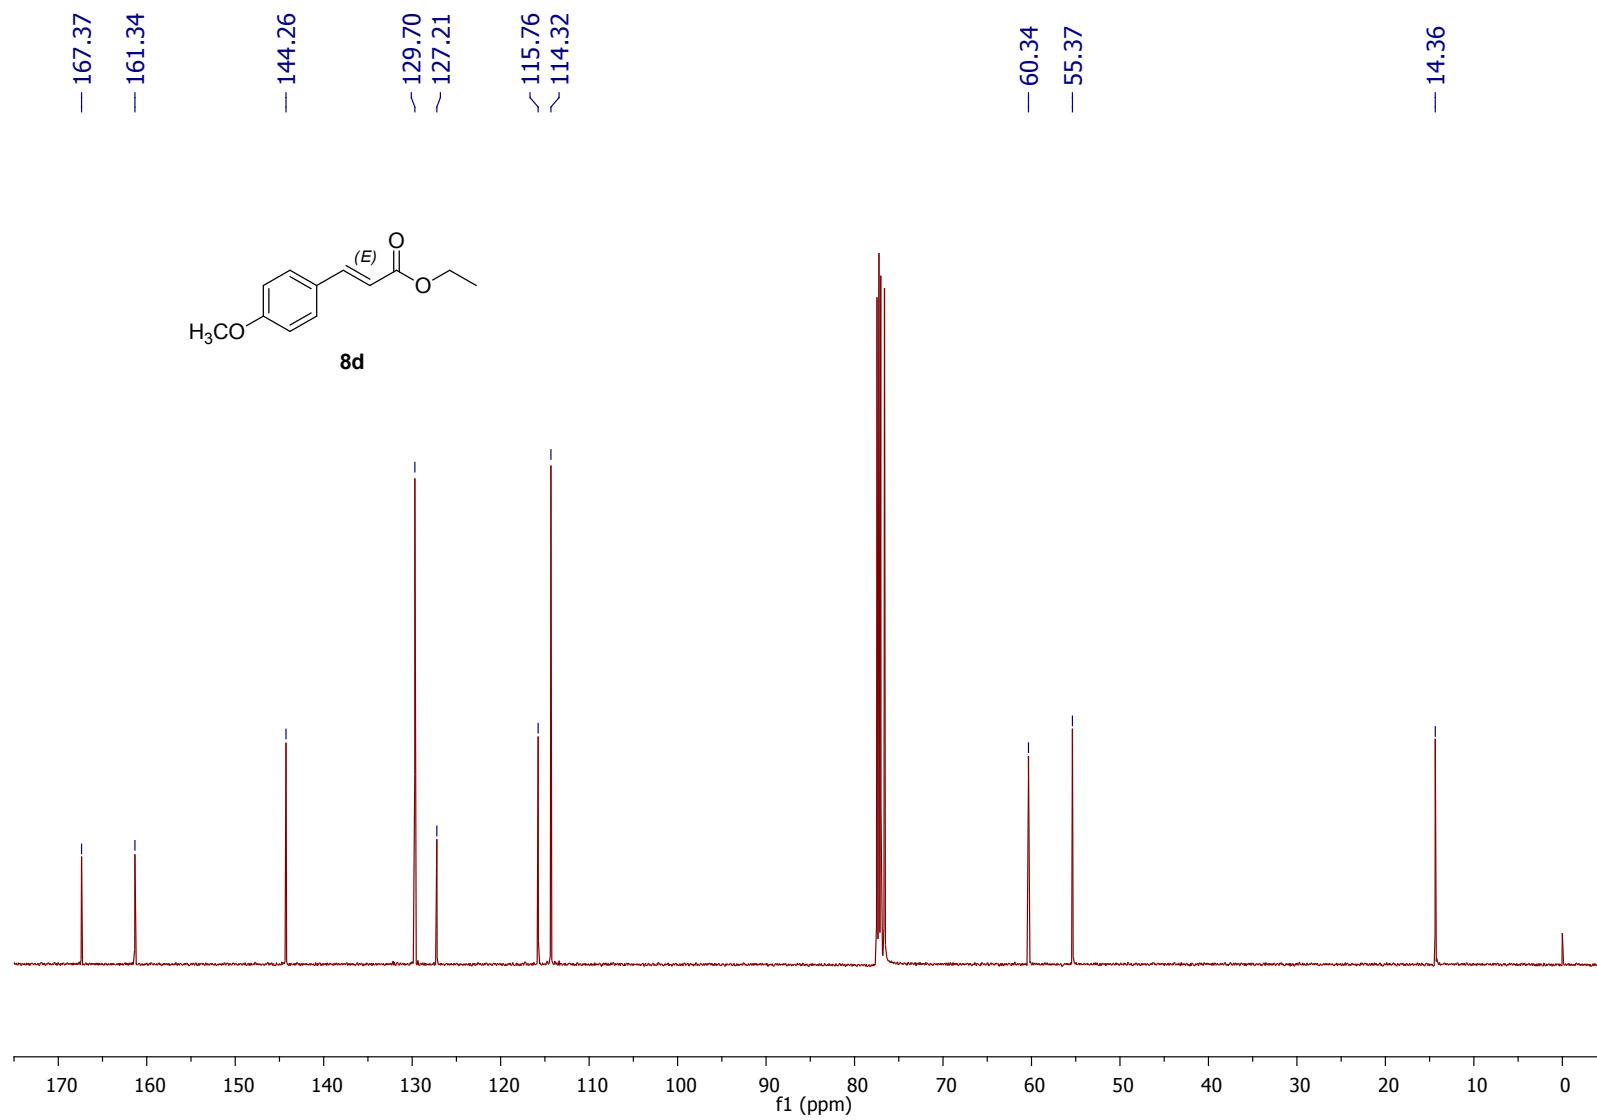

<sup>1</sup>H NMR (300 MHz, CDCl<sub>3</sub>) of substrate **8e**

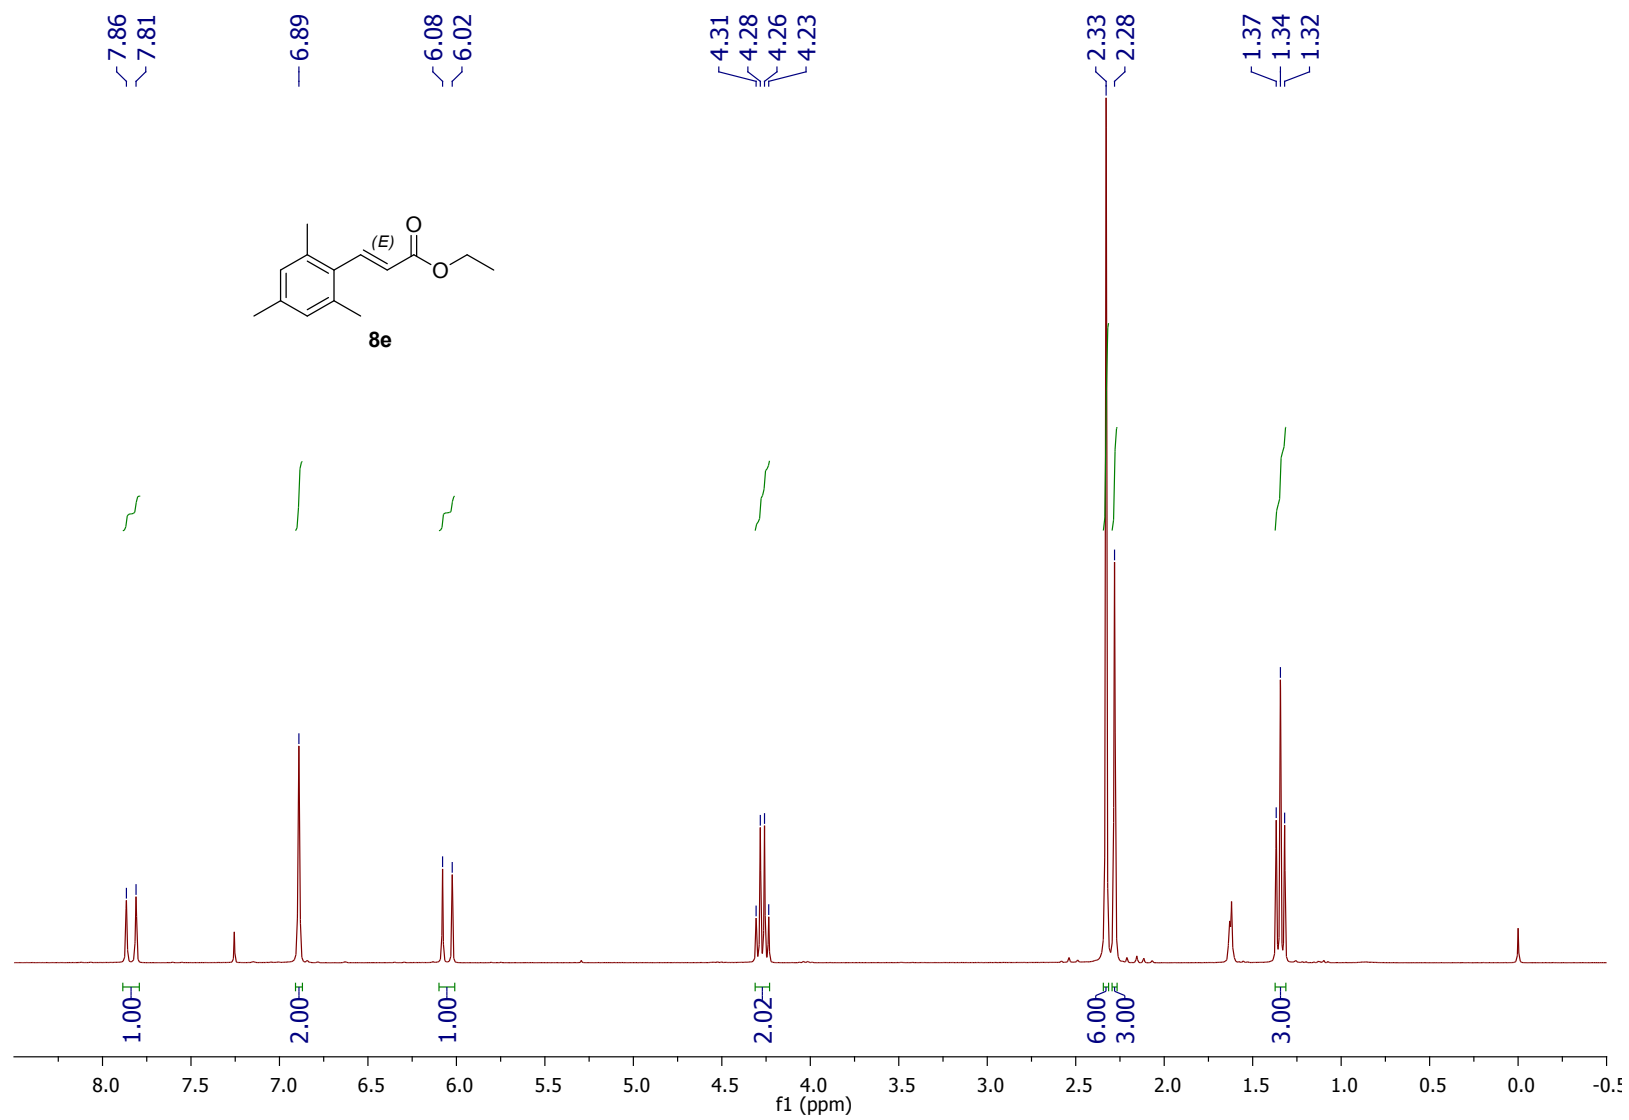

<sup>13</sup>C NMR (75 MHz, CDCl<sub>3</sub>) of substrate **8e**

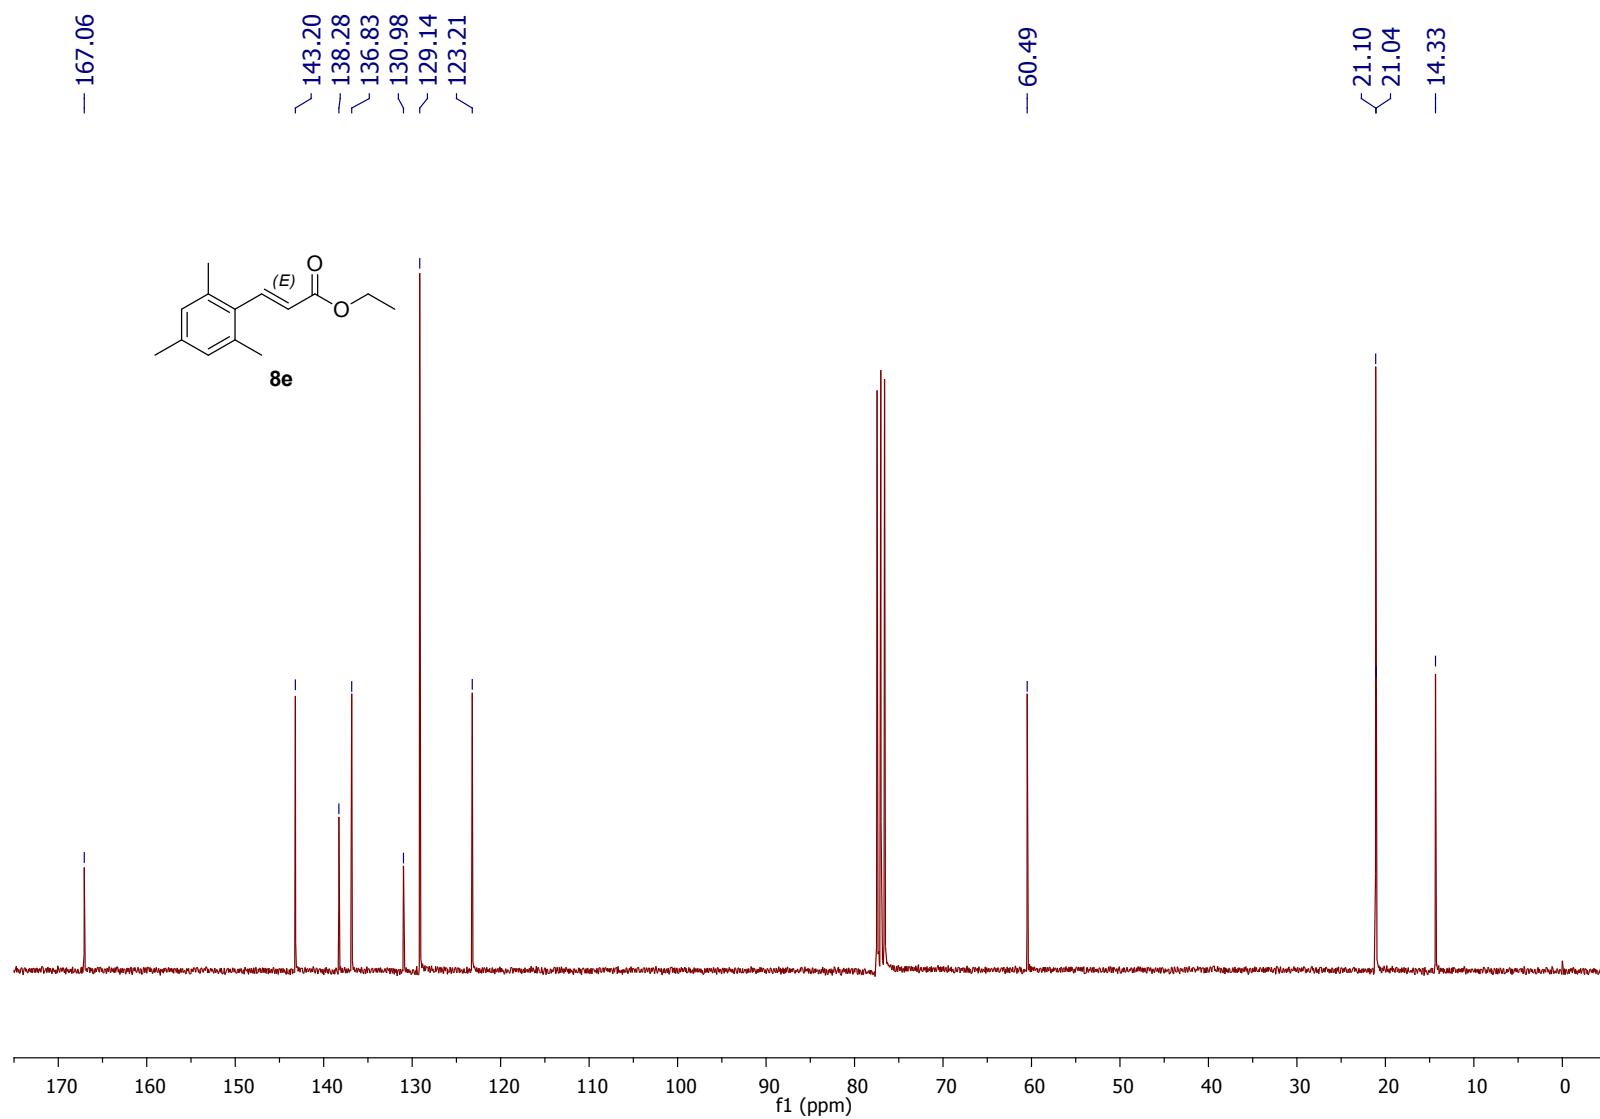

<sup>1</sup>H NMR (300 MHz, CDCl<sub>3</sub>) of substrate **8f**

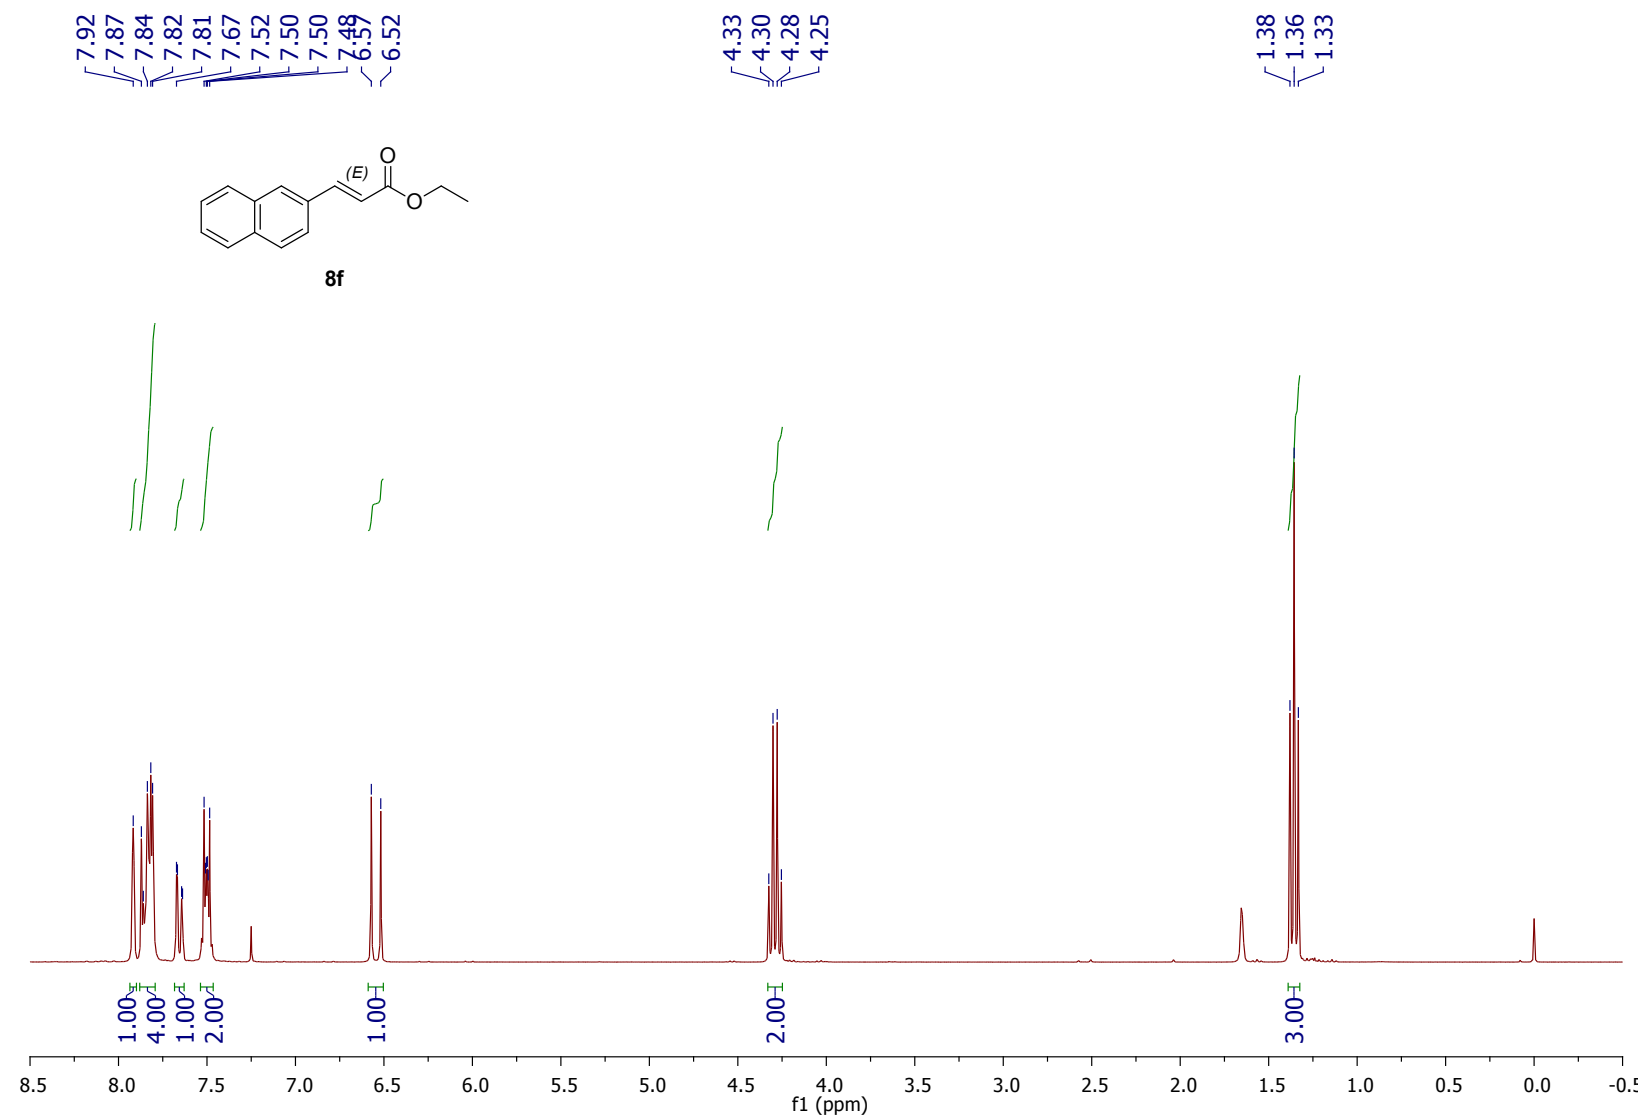

<sup>13</sup>C NMR (75 MHz, CDCl<sub>3</sub>) of substrate **8f**

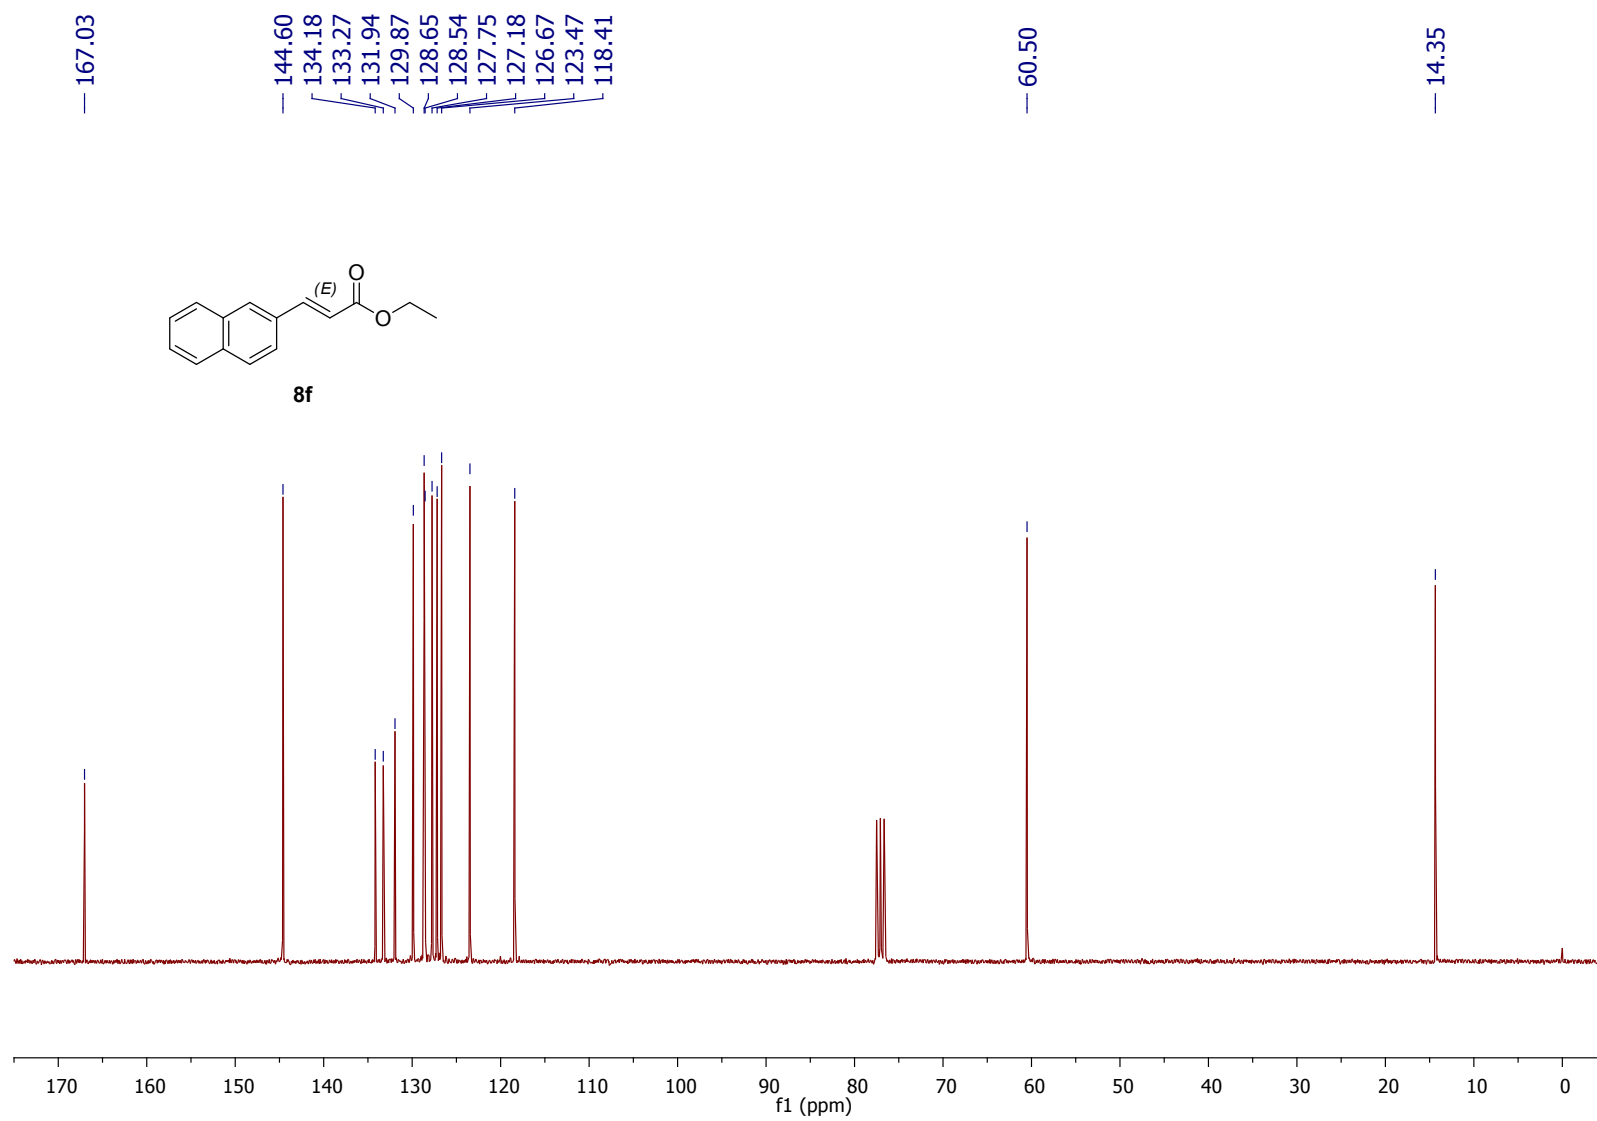

<sup>1</sup>H NMR (300 MHz, CDCl<sub>3</sub>) of substrate **8g**

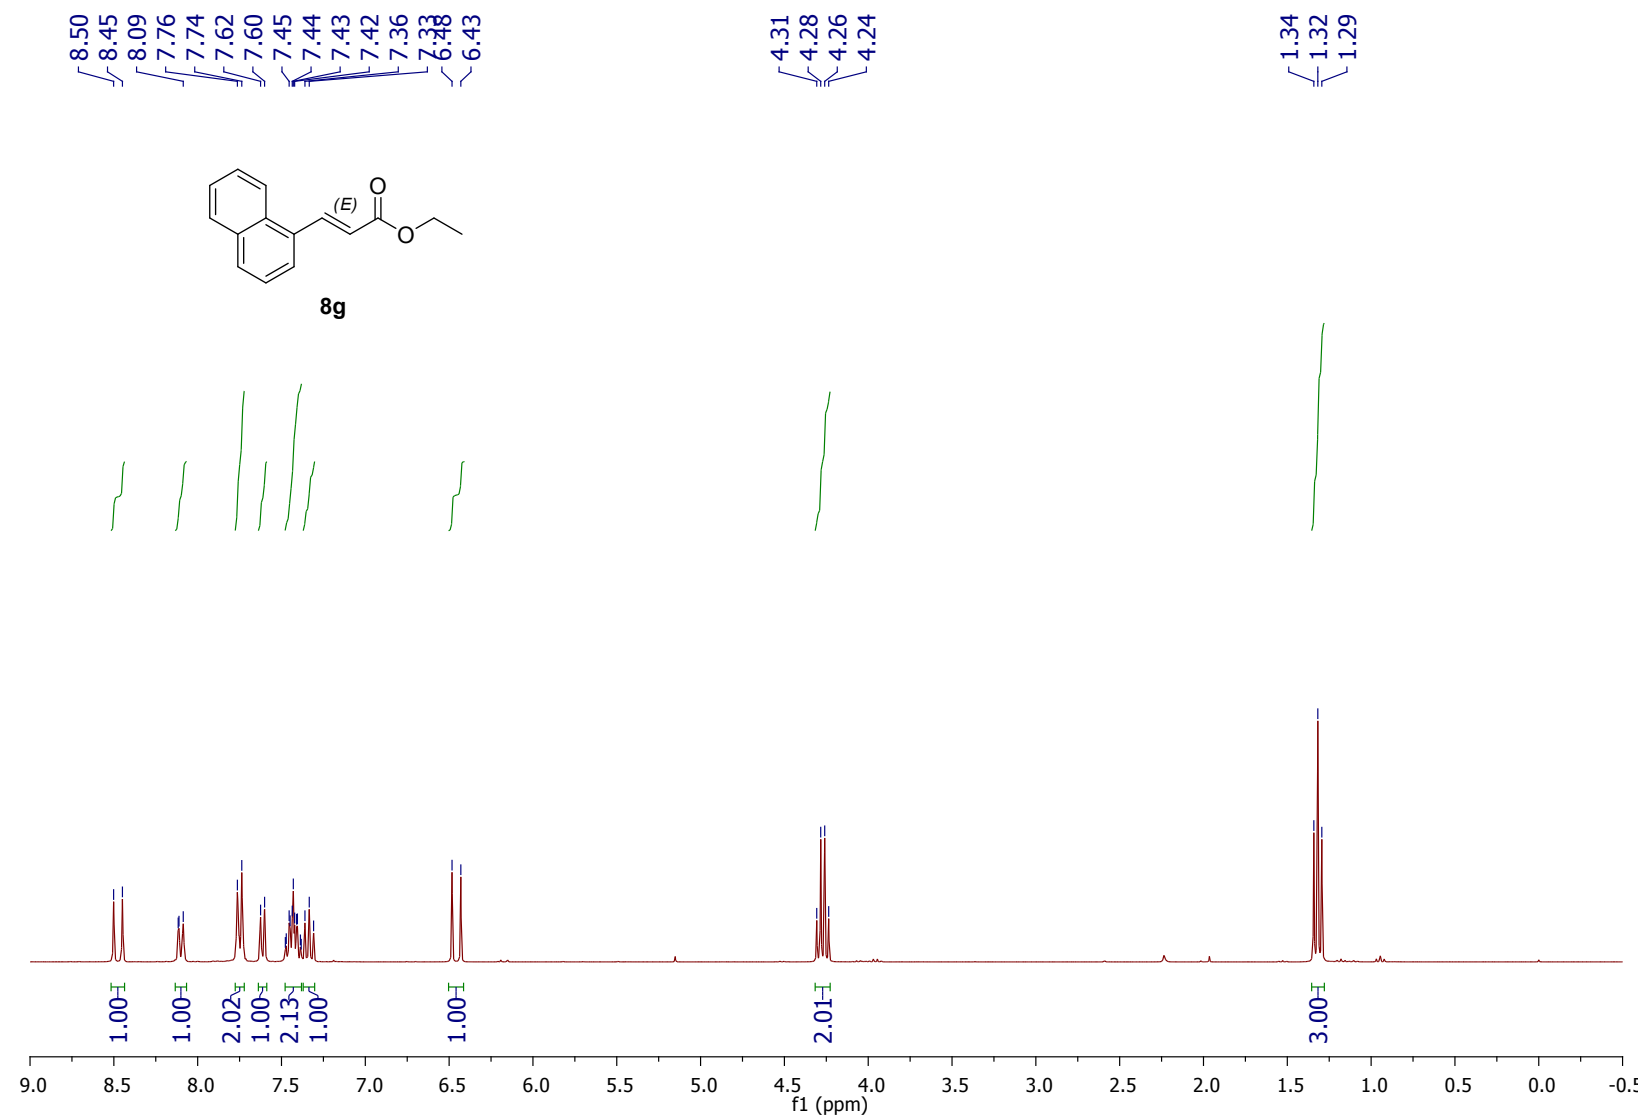



<sup>13</sup>C NMR (75 MHz, CDCl<sub>3</sub>) of substrate **8g**

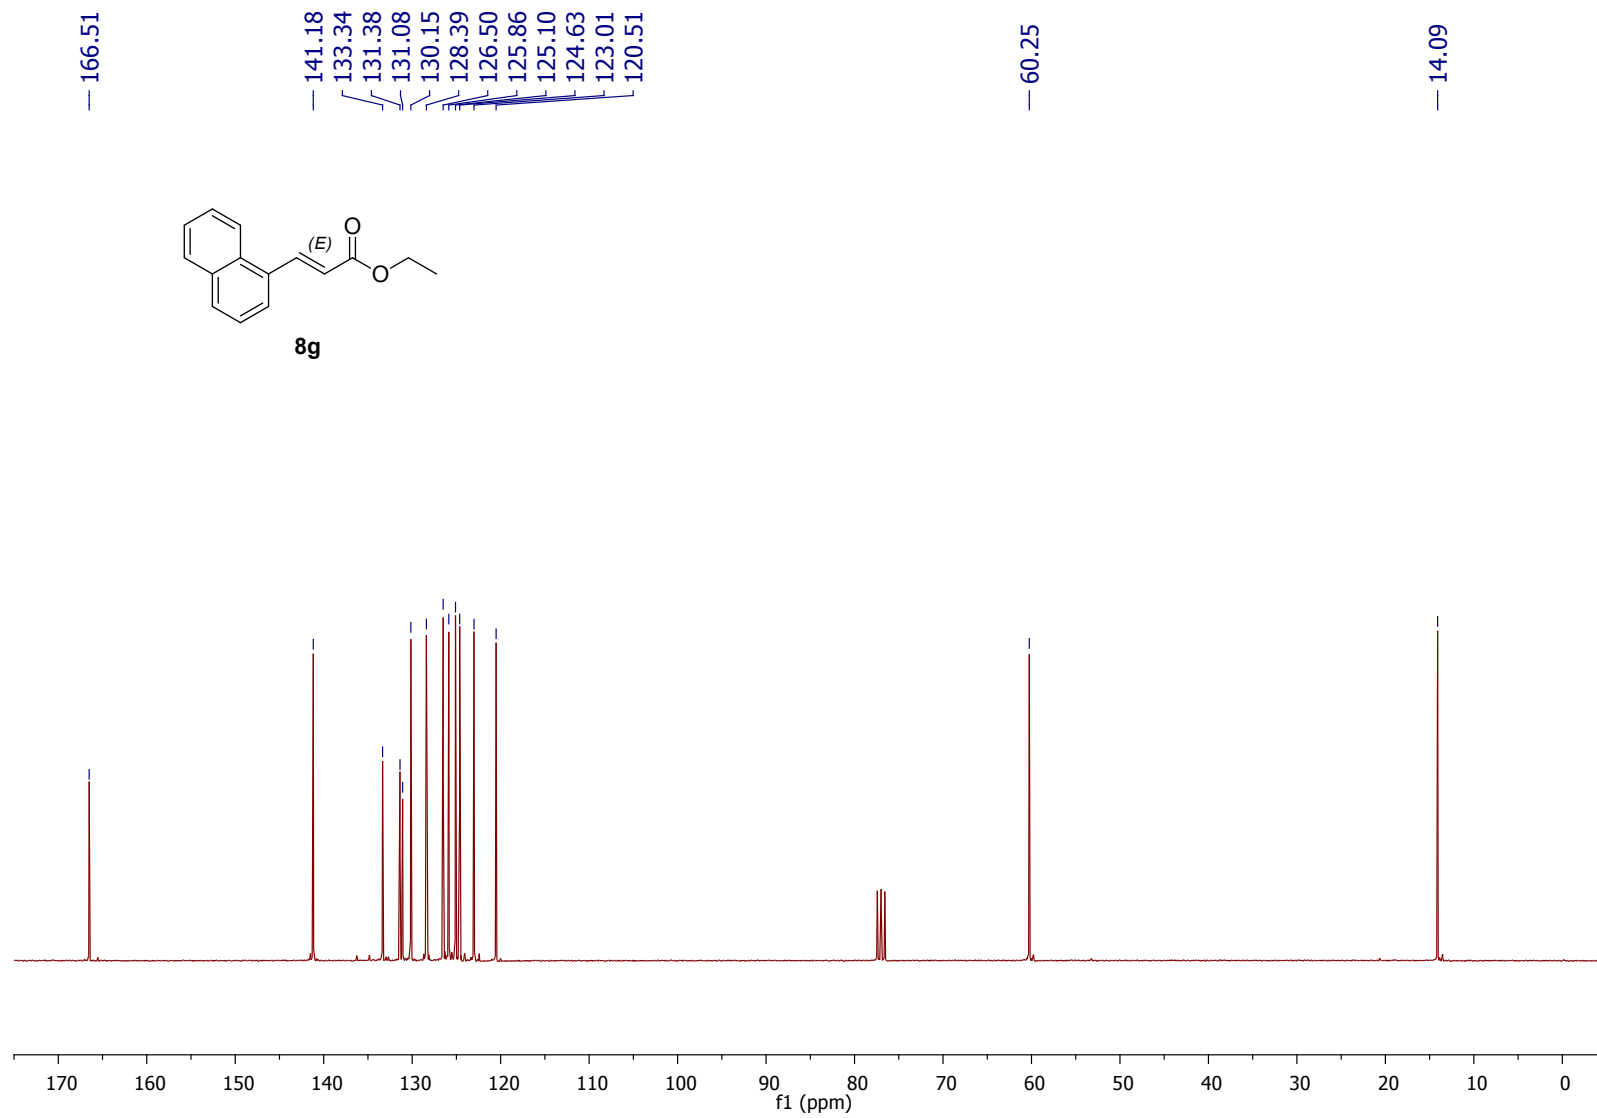

<sup>1</sup>H NMR (300 MHz, CDCl<sub>3</sub>) of substrate **8h**

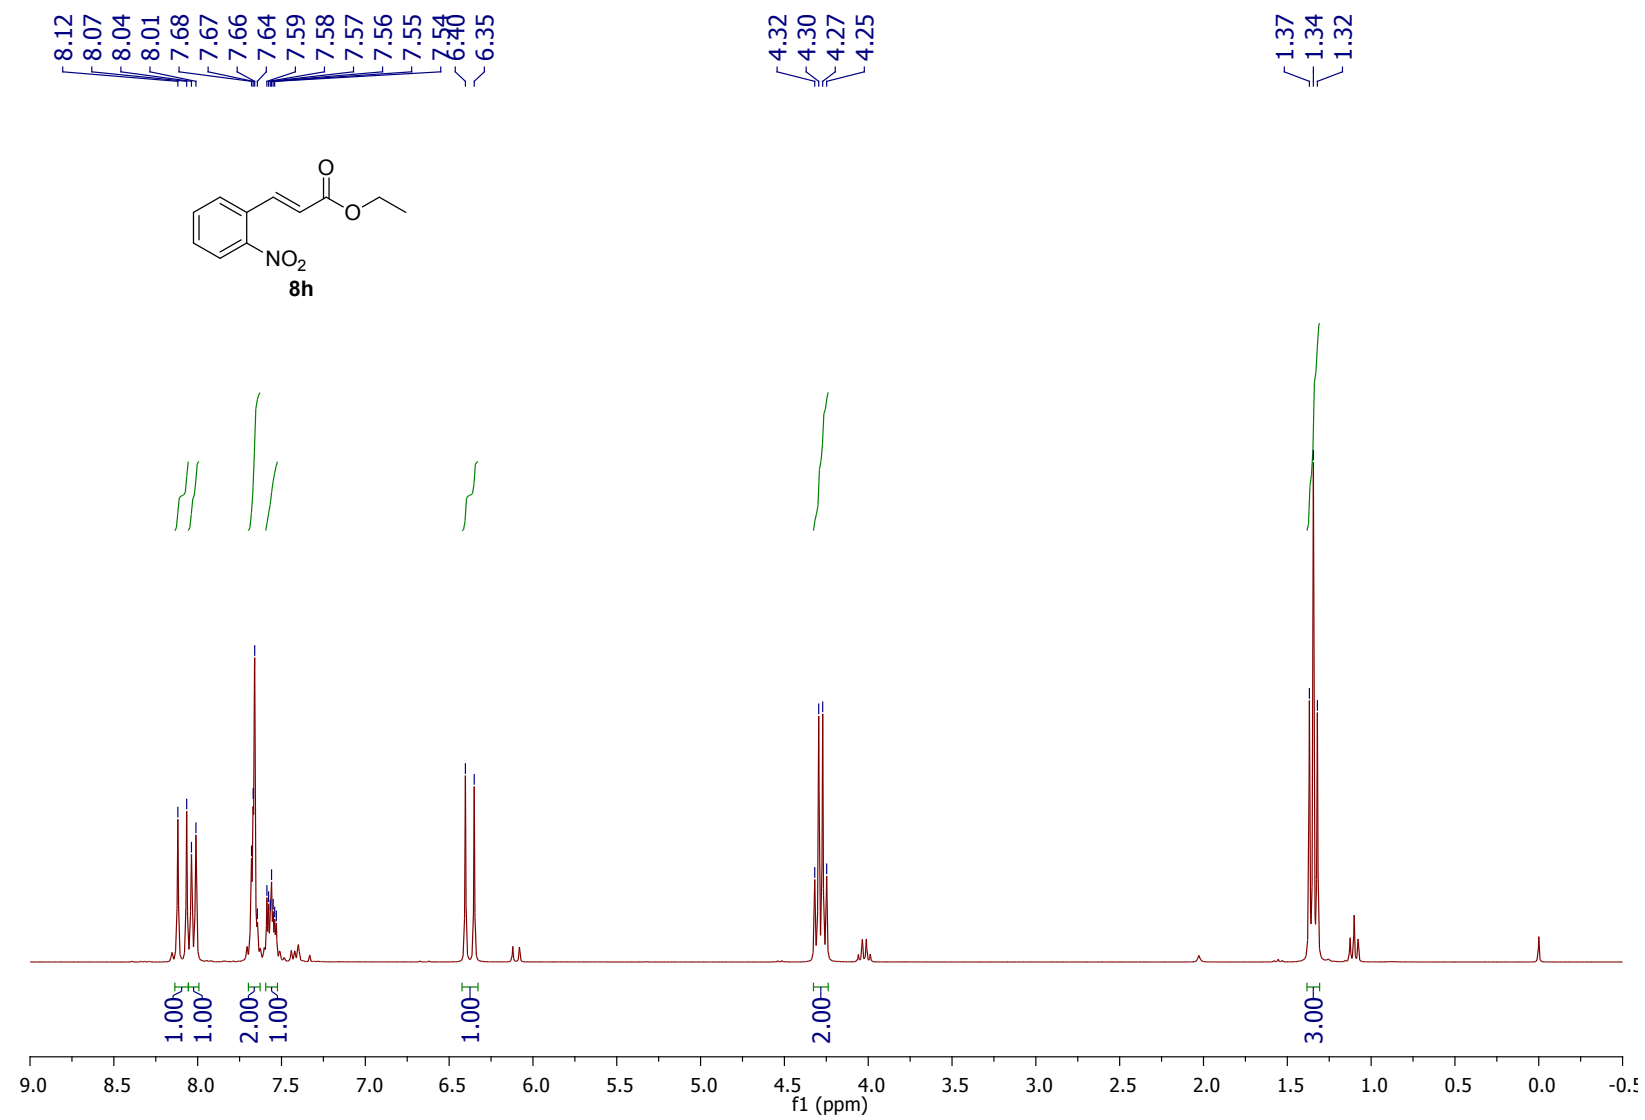

<sup>13</sup>C NMR (75 MHz, CDCl<sub>3</sub>) of substrate **8h**

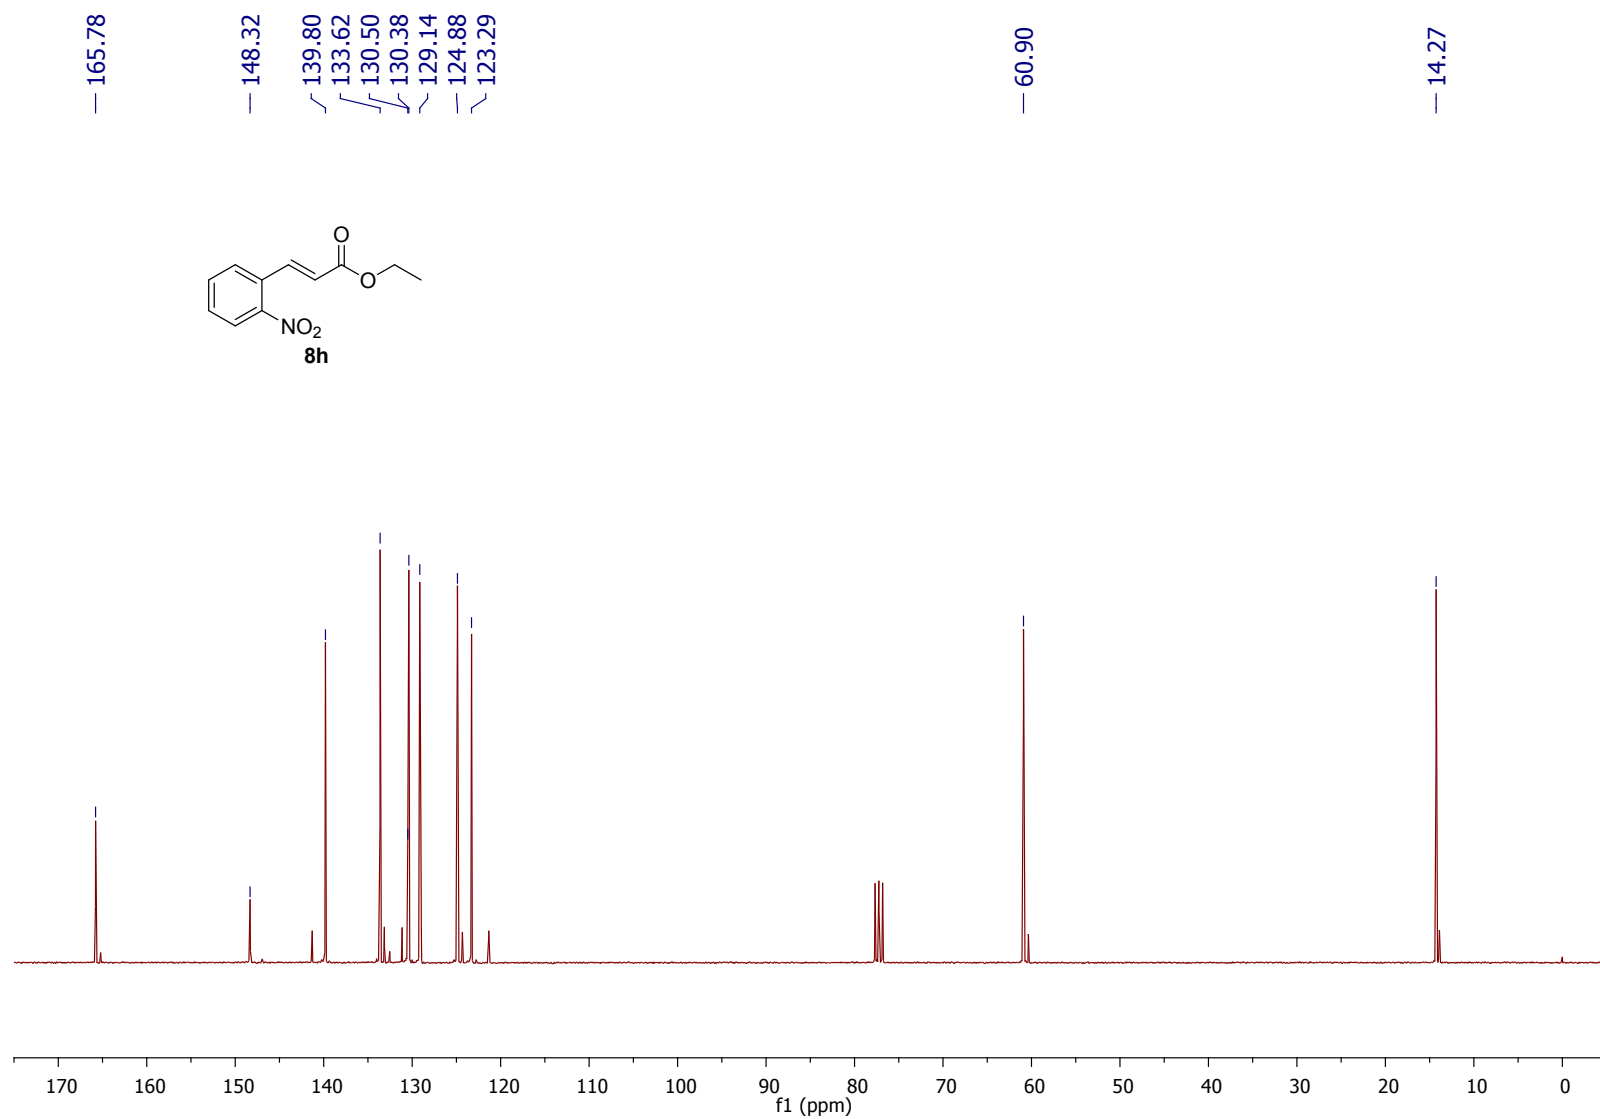

<sup>1</sup>H NMR (300 MHz, CDCl<sub>3</sub>) of substrate **8i**

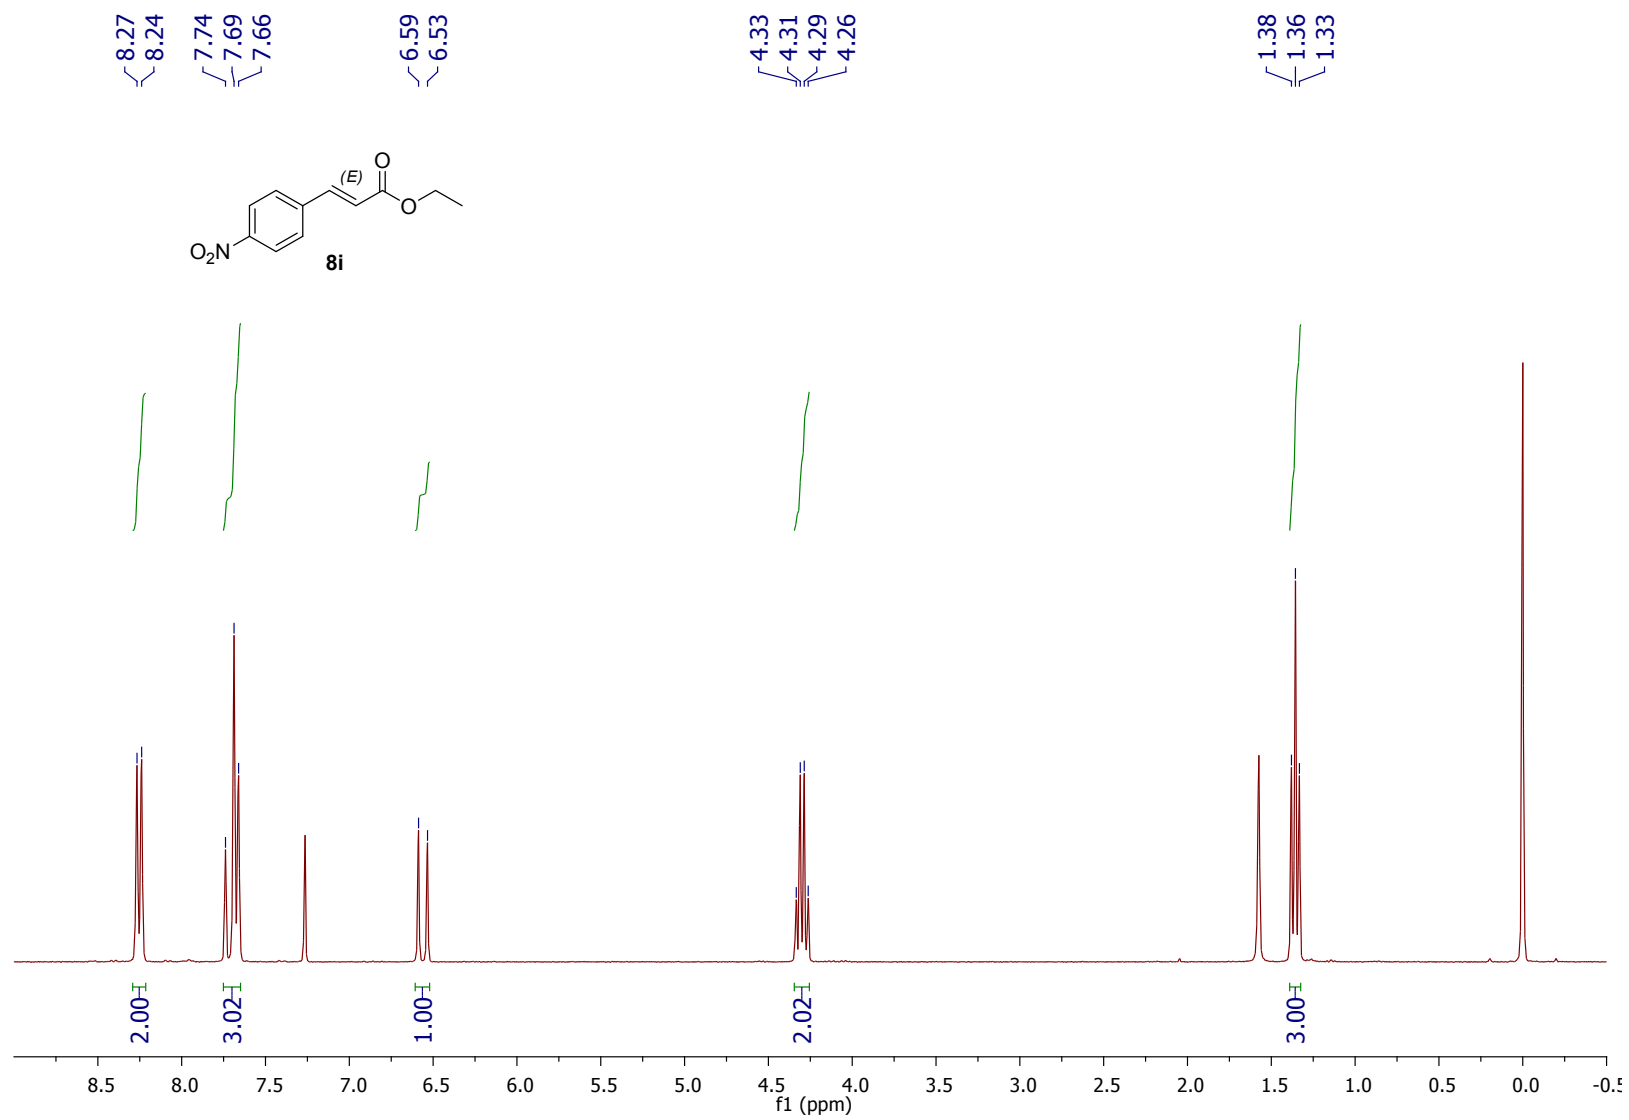

<sup>13</sup>C NMR (75 MHz, CDCl<sub>3</sub>) of substrate **8i**

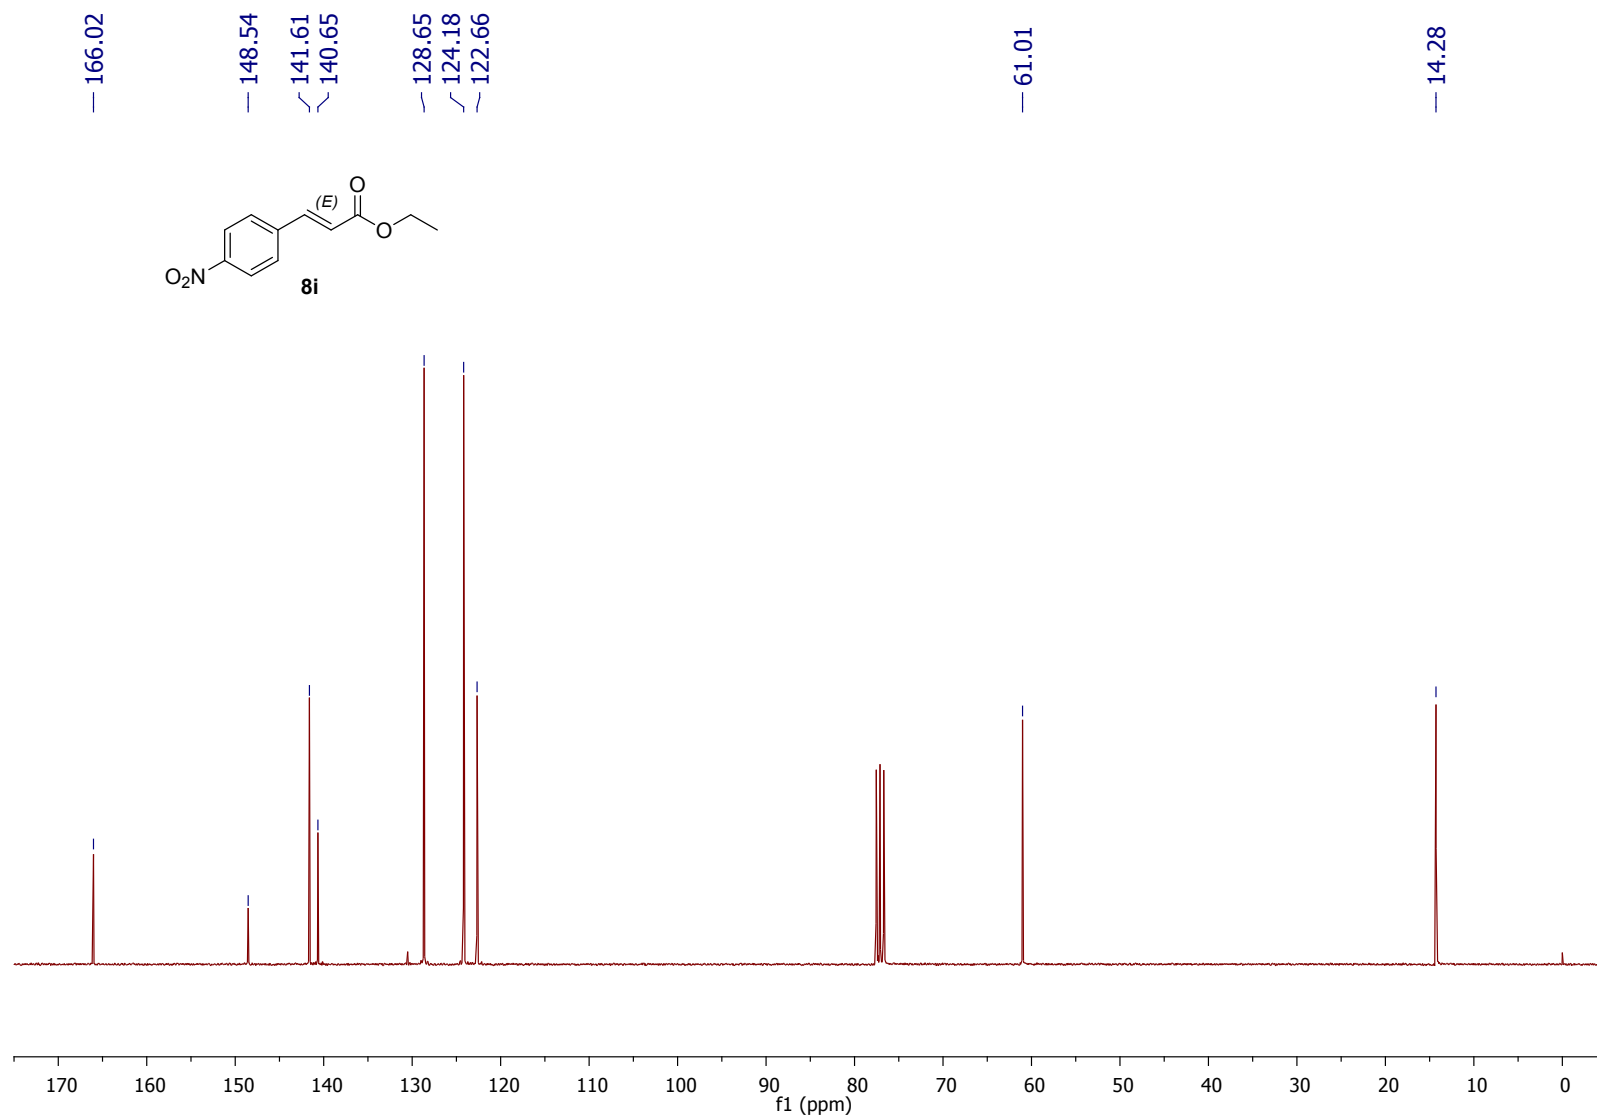

<sup>1</sup>H NMR (300 MHz, CDCl<sub>3</sub>) of substrate **8j**

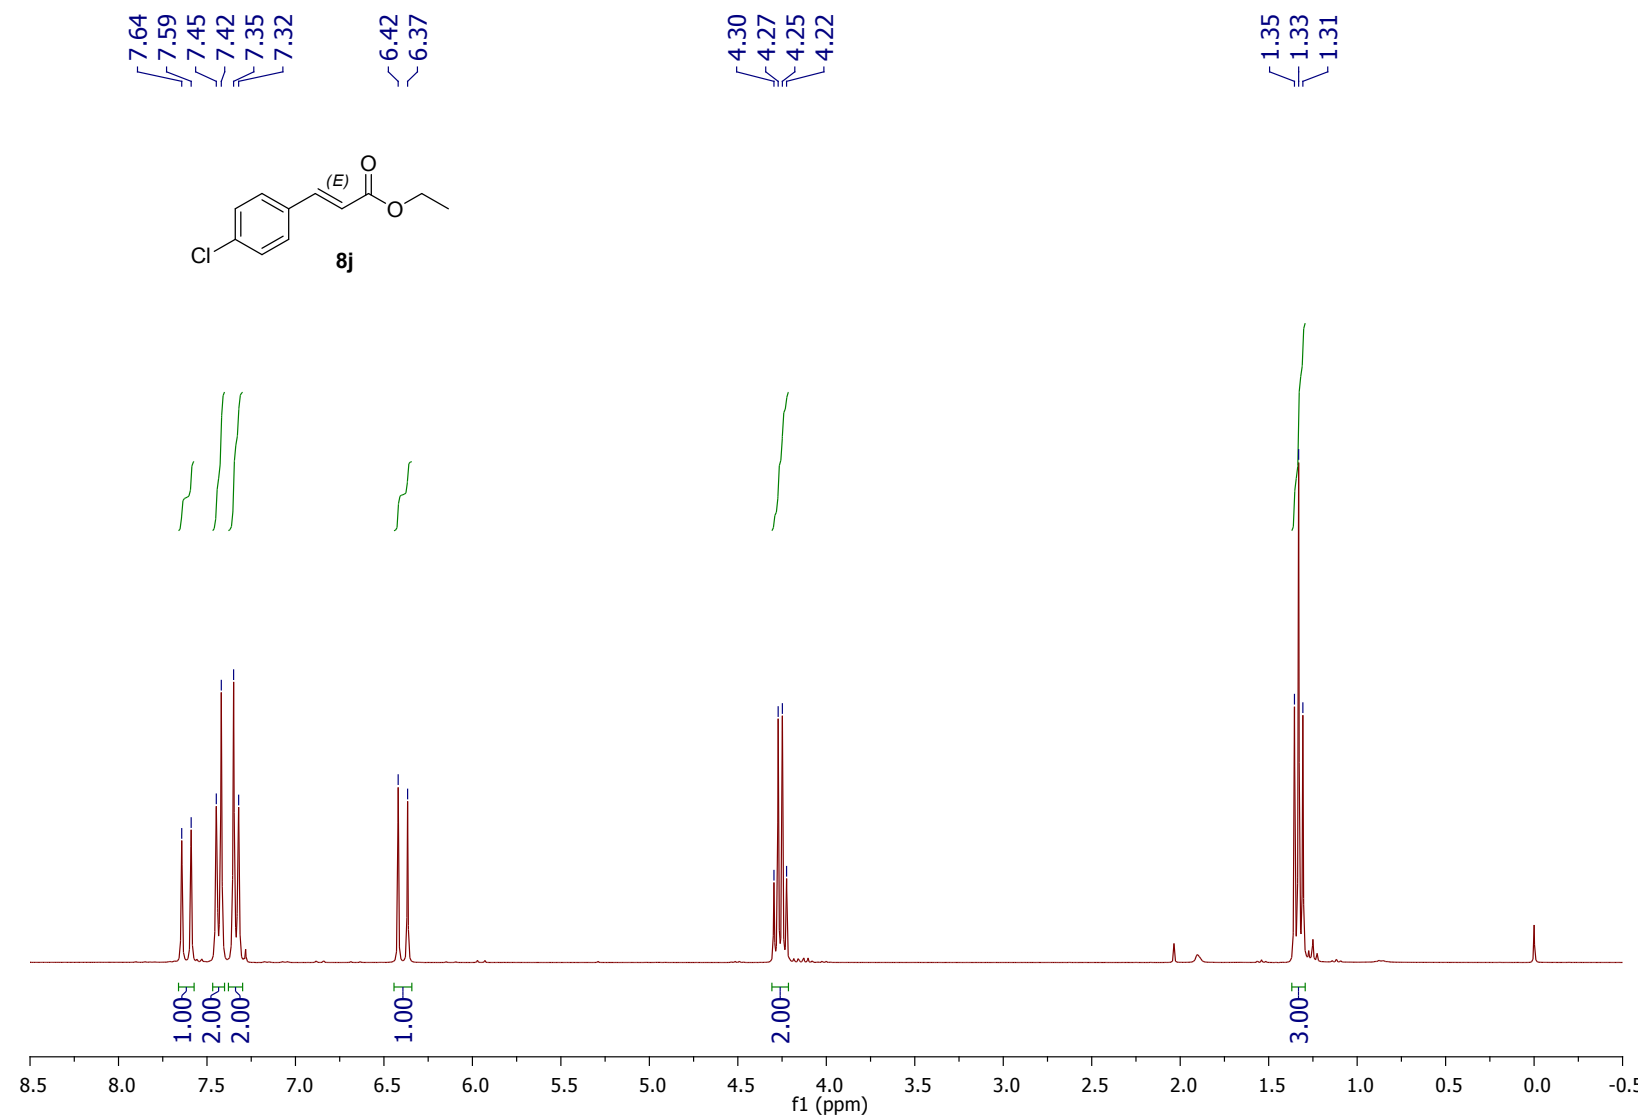

<sup>13</sup>C NMR (75 MHz, CDCl<sub>3</sub>) of substrate **8j**

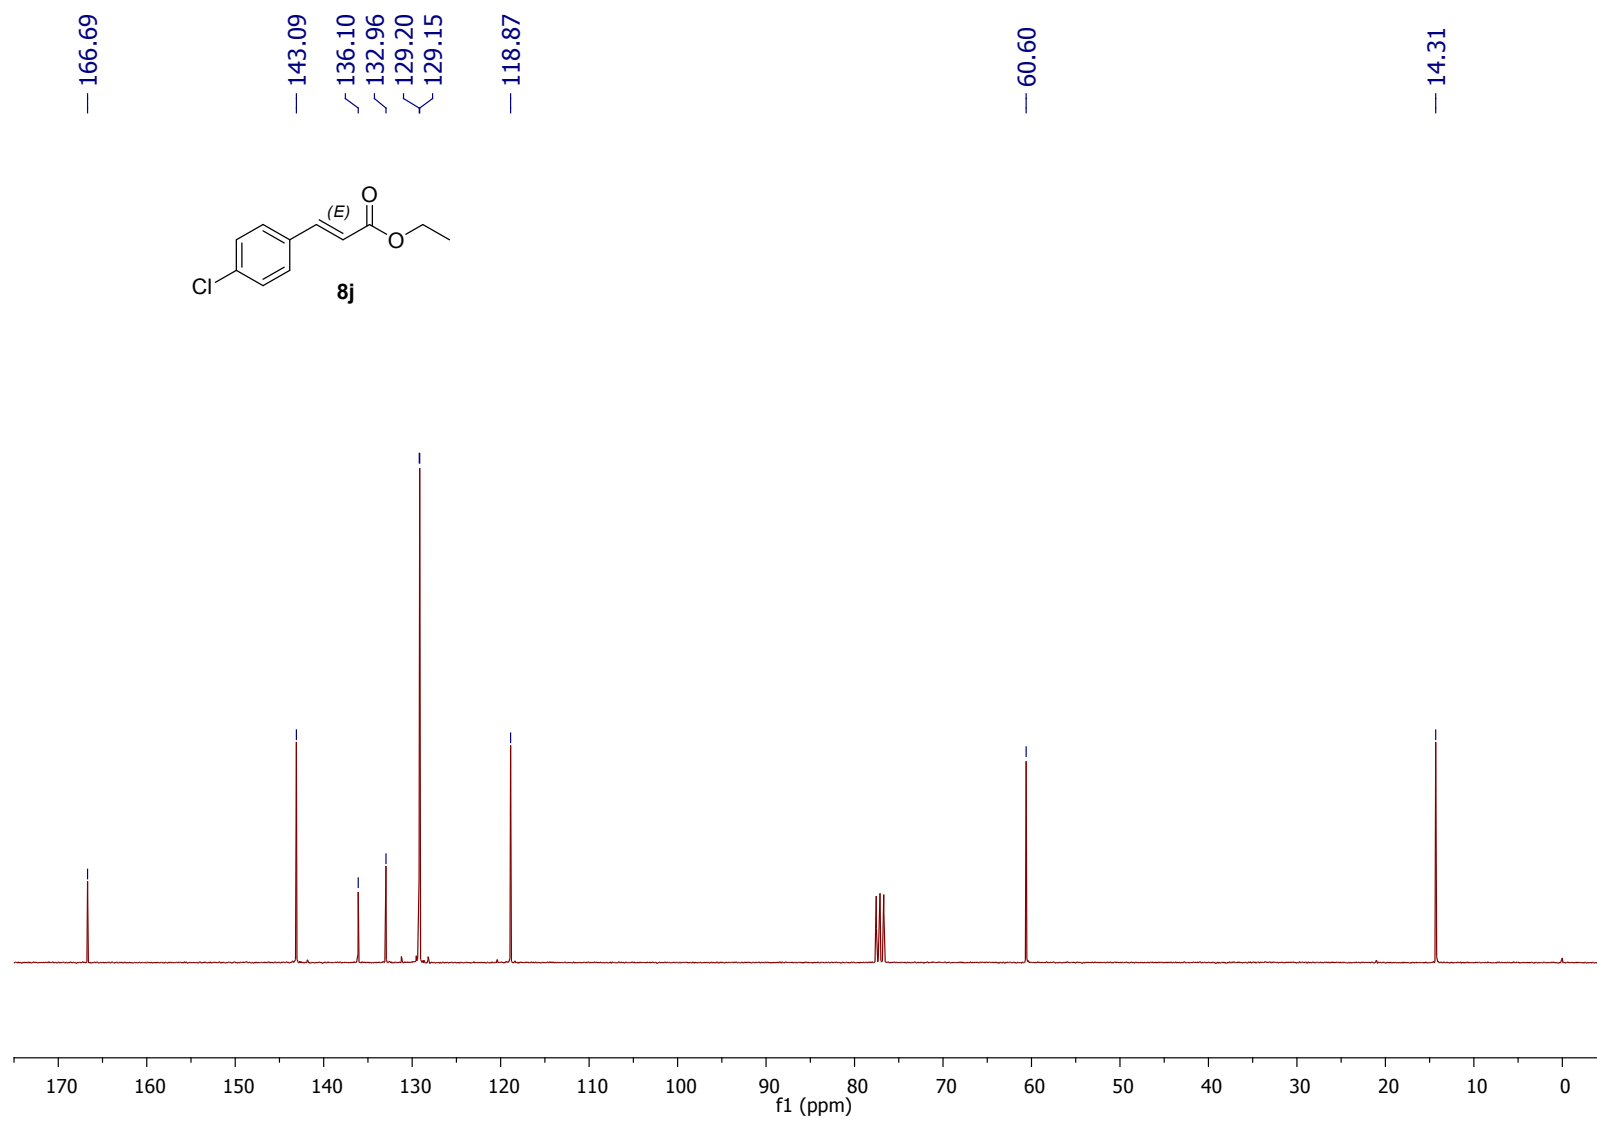

<sup>1</sup>H NMR (300 MHz, CDCl<sub>3</sub>) of substrate **8k**

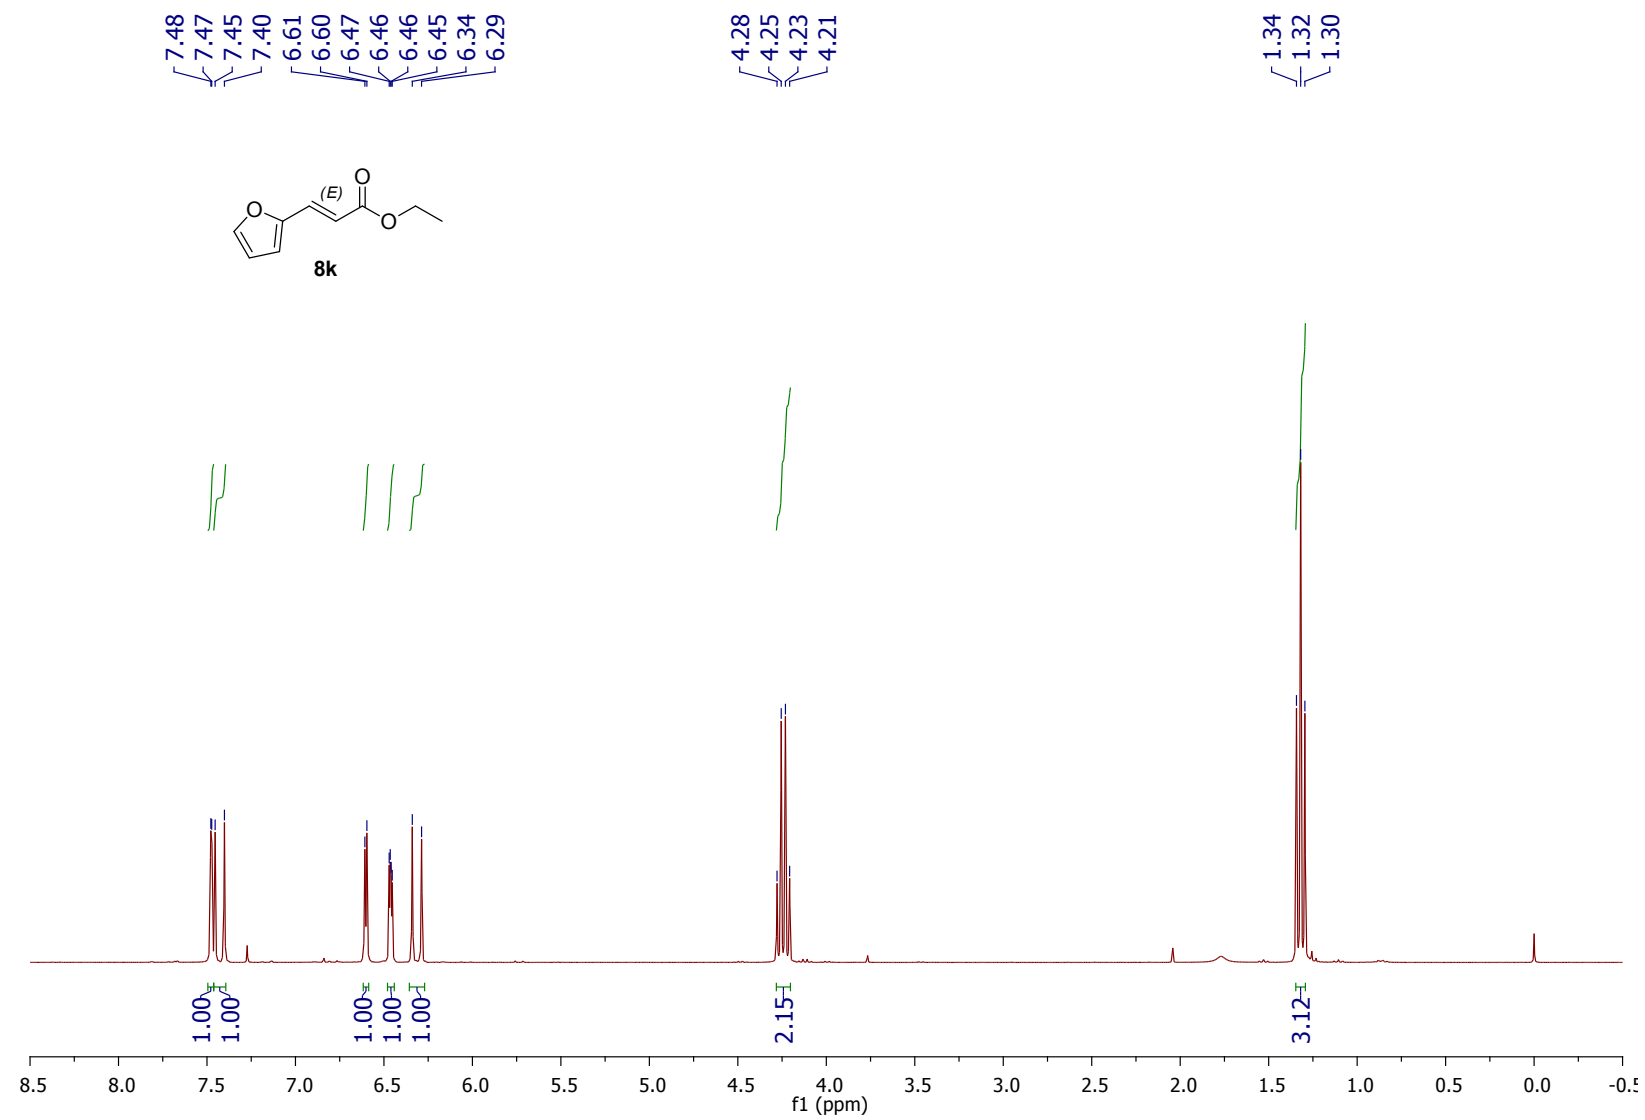



<sup>13</sup>C NMR (75 MHz, CDCl<sub>3</sub>) of substrate **8k**

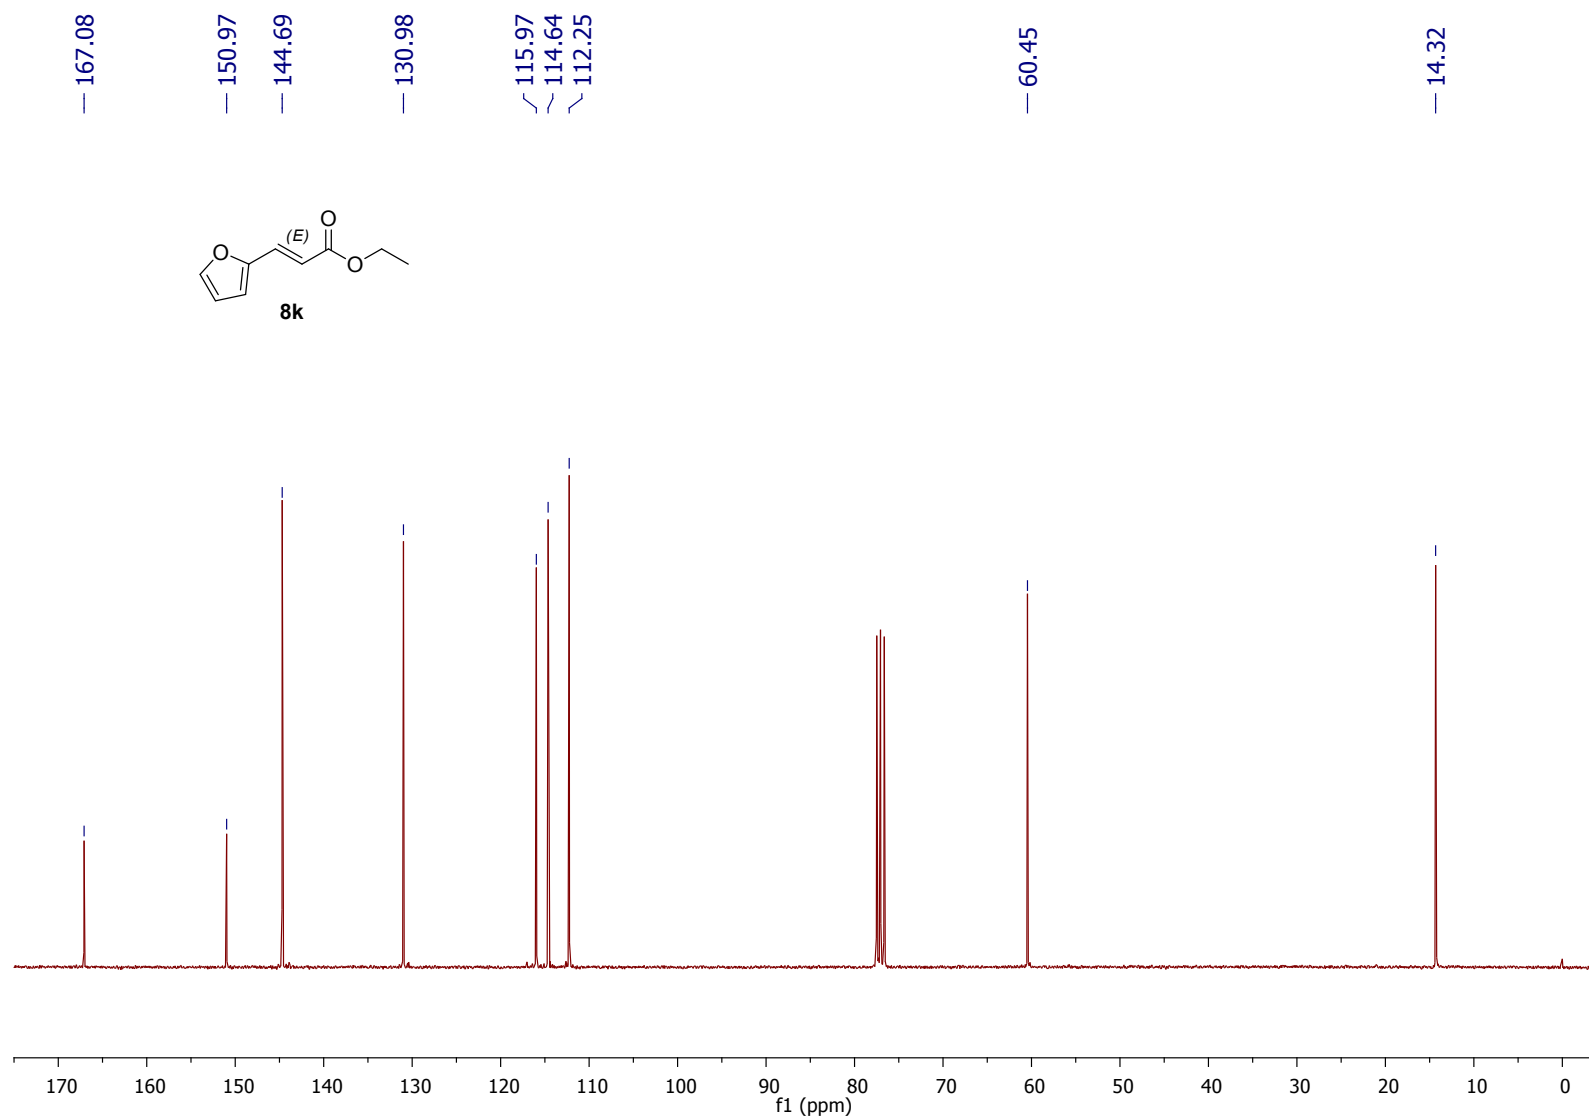

<sup>1</sup>H NMR (300 MHz, CDCl<sub>3</sub>) of substrate **8I**

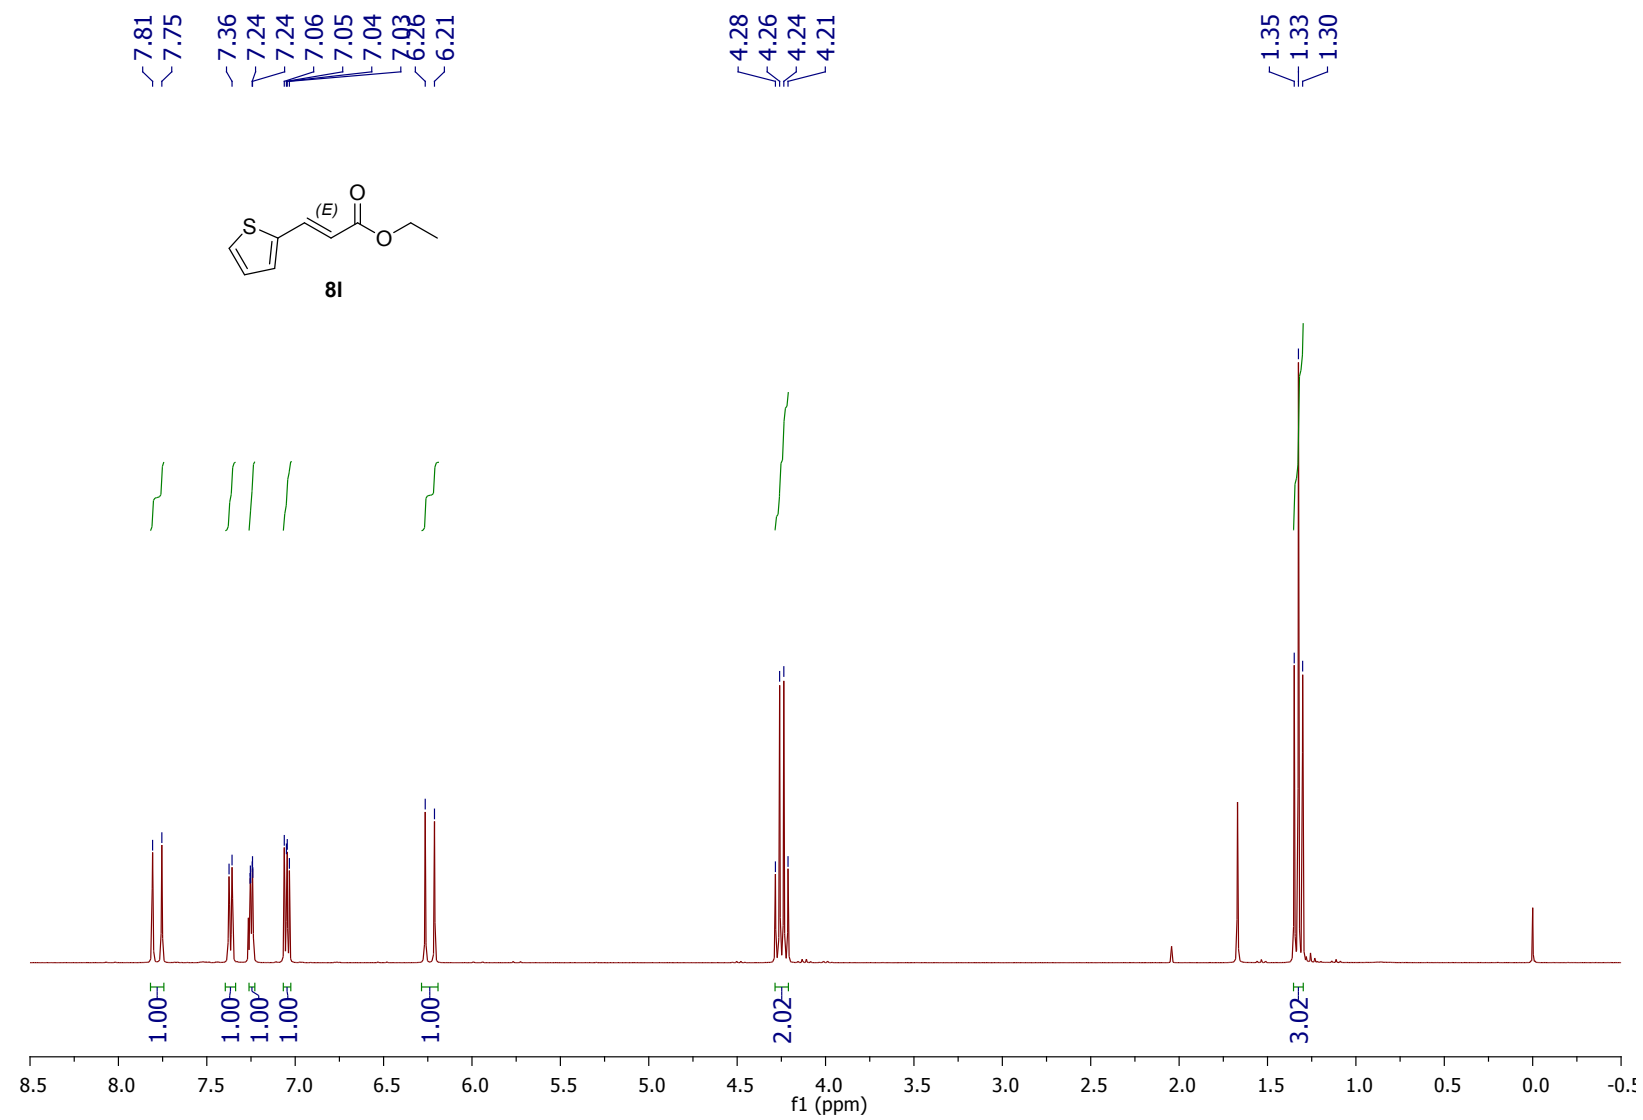

<sup>13</sup>C NMR (75 MHz, CDCl<sub>3</sub>) of substrate **8I**

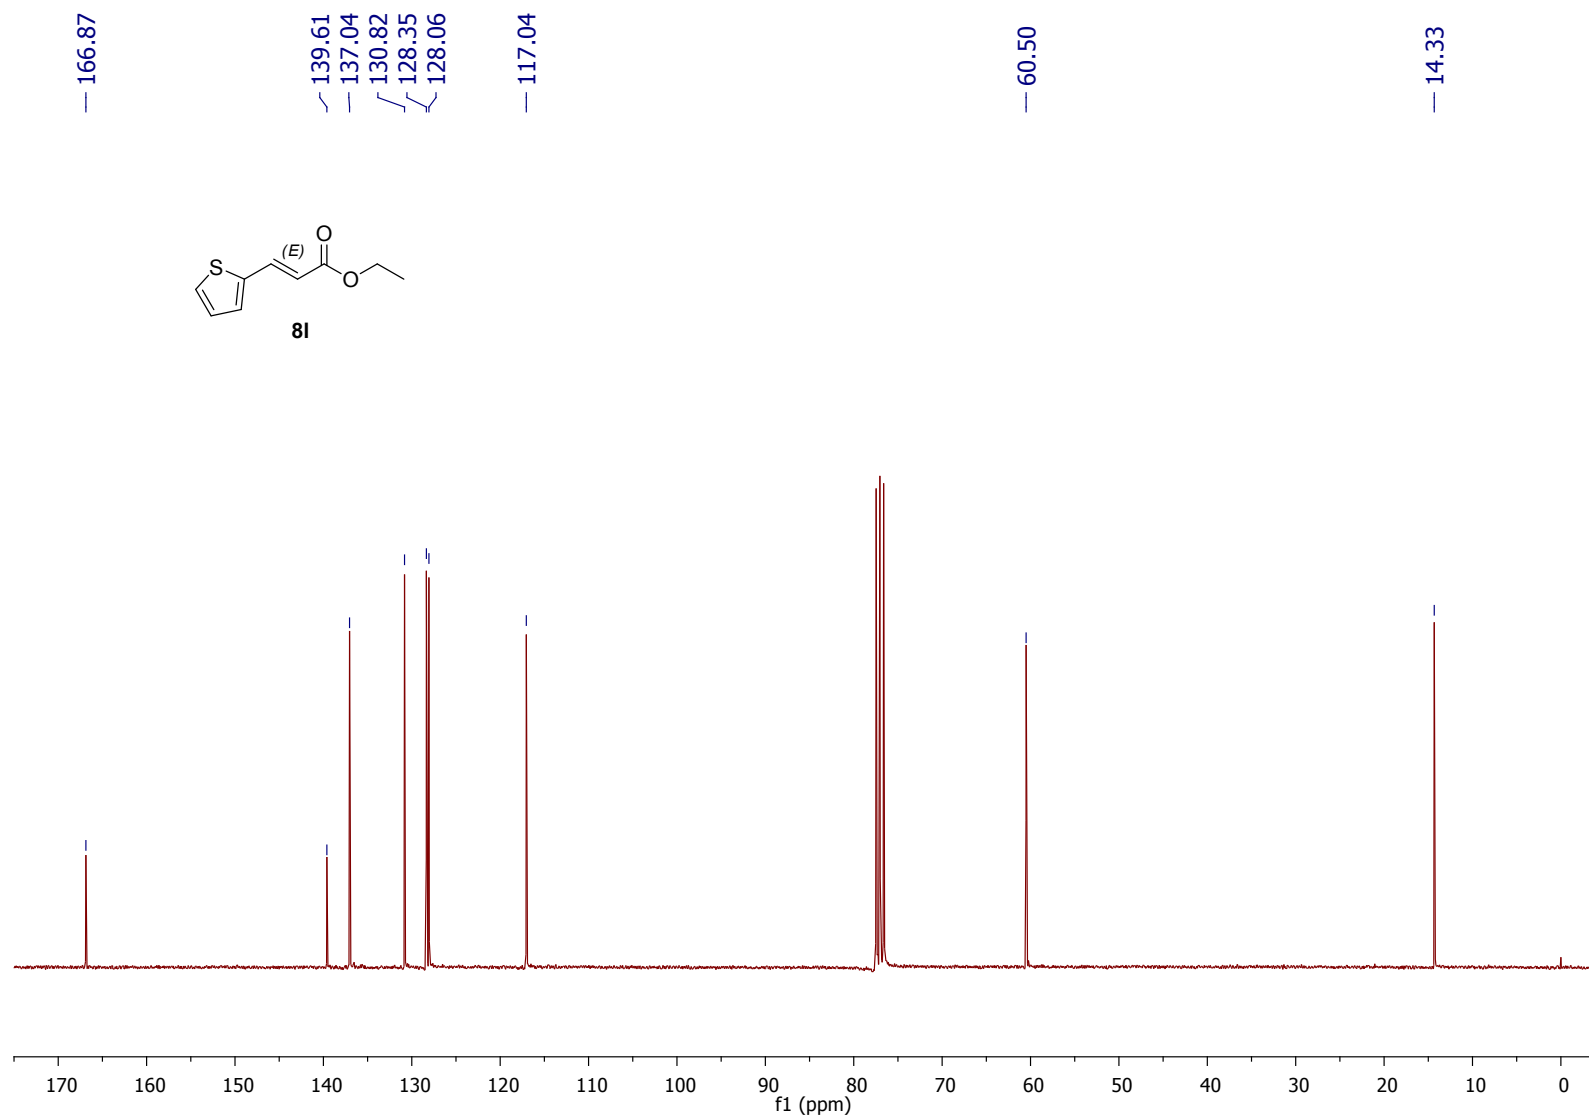

<sup>1</sup>H NMR (300 MHz, CDCl<sub>3</sub>) of substrate **9b**

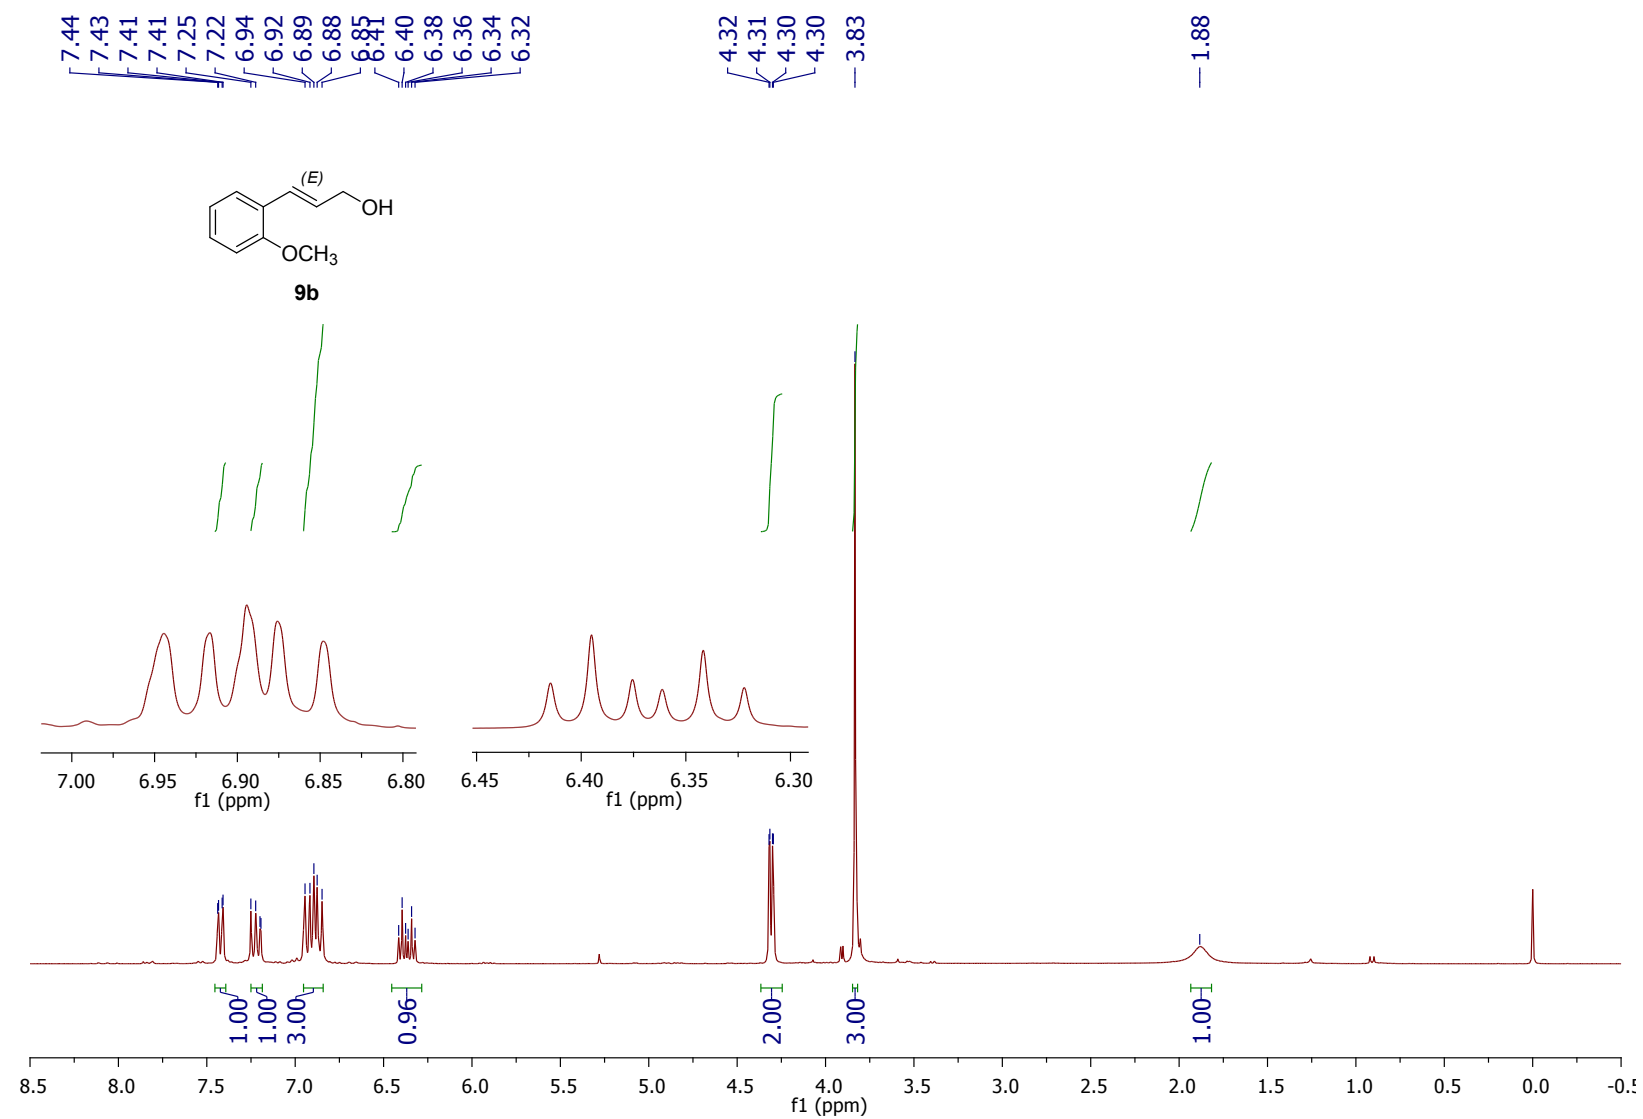

$^{13}\text{C}$  NMR (75 MHz,  $\text{CDCl}_3$ ) of substrate **9b**

— 156.75  
— 129.30  
— 128.76  
— 127.01  
— 126.16  
— 125.74  
— 120.69  
— 110.85  
— 64.19  
— 55.43

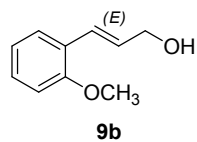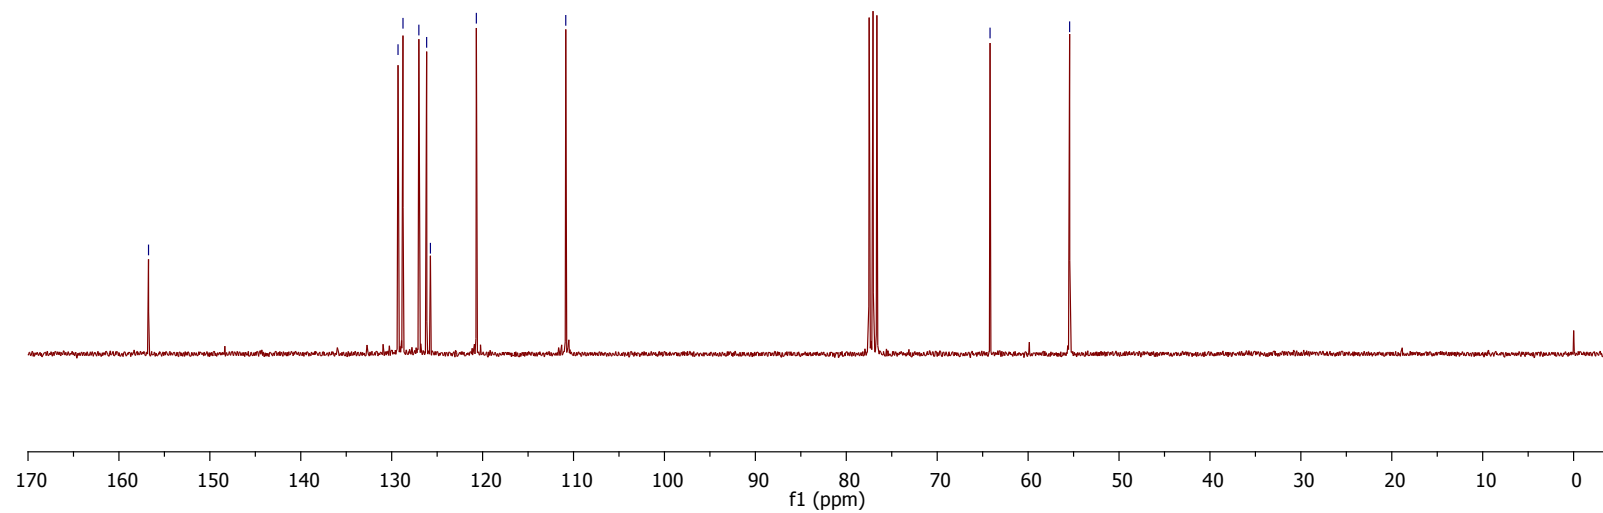

<sup>1</sup>H NMR (300 MHz, CDCl<sub>3</sub>) of substrate **9c**

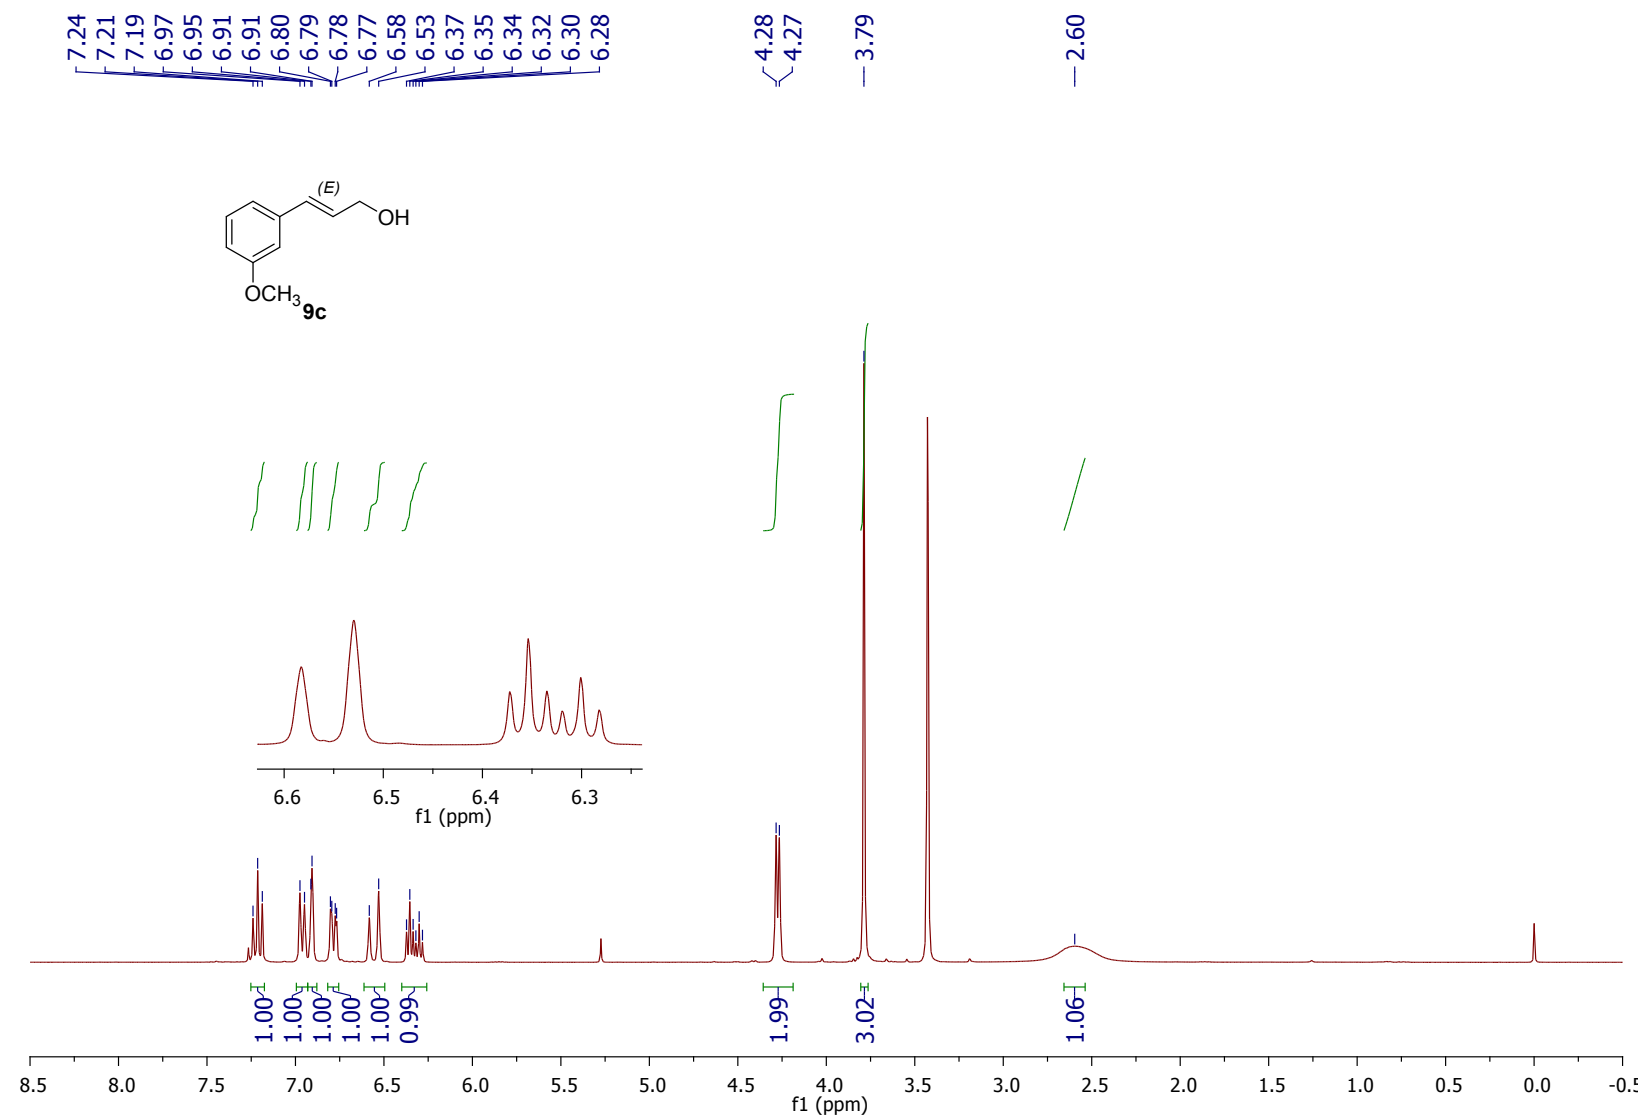

<sup>13</sup>C NMR (75 MHz, CDCl<sub>3</sub>) of substrate **9c**

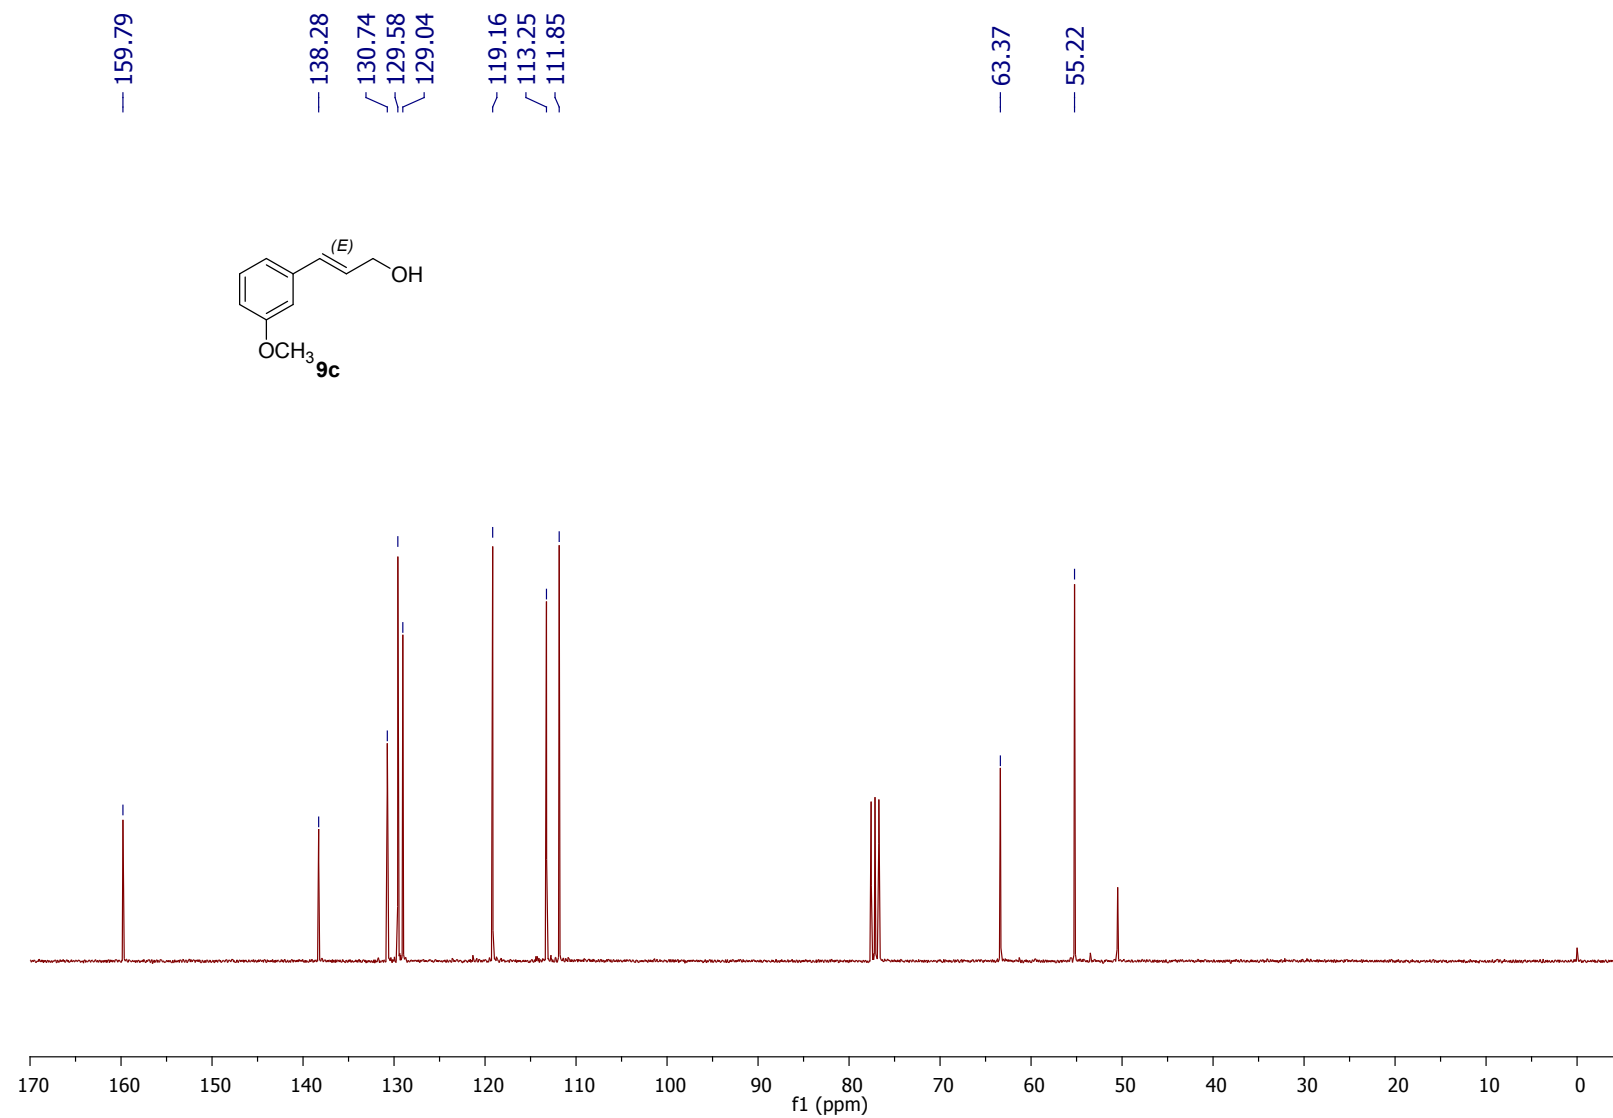

$^1\text{H}$  NMR (300 MHz,  $\text{CDCl}_3$ ) of substrate **9d**

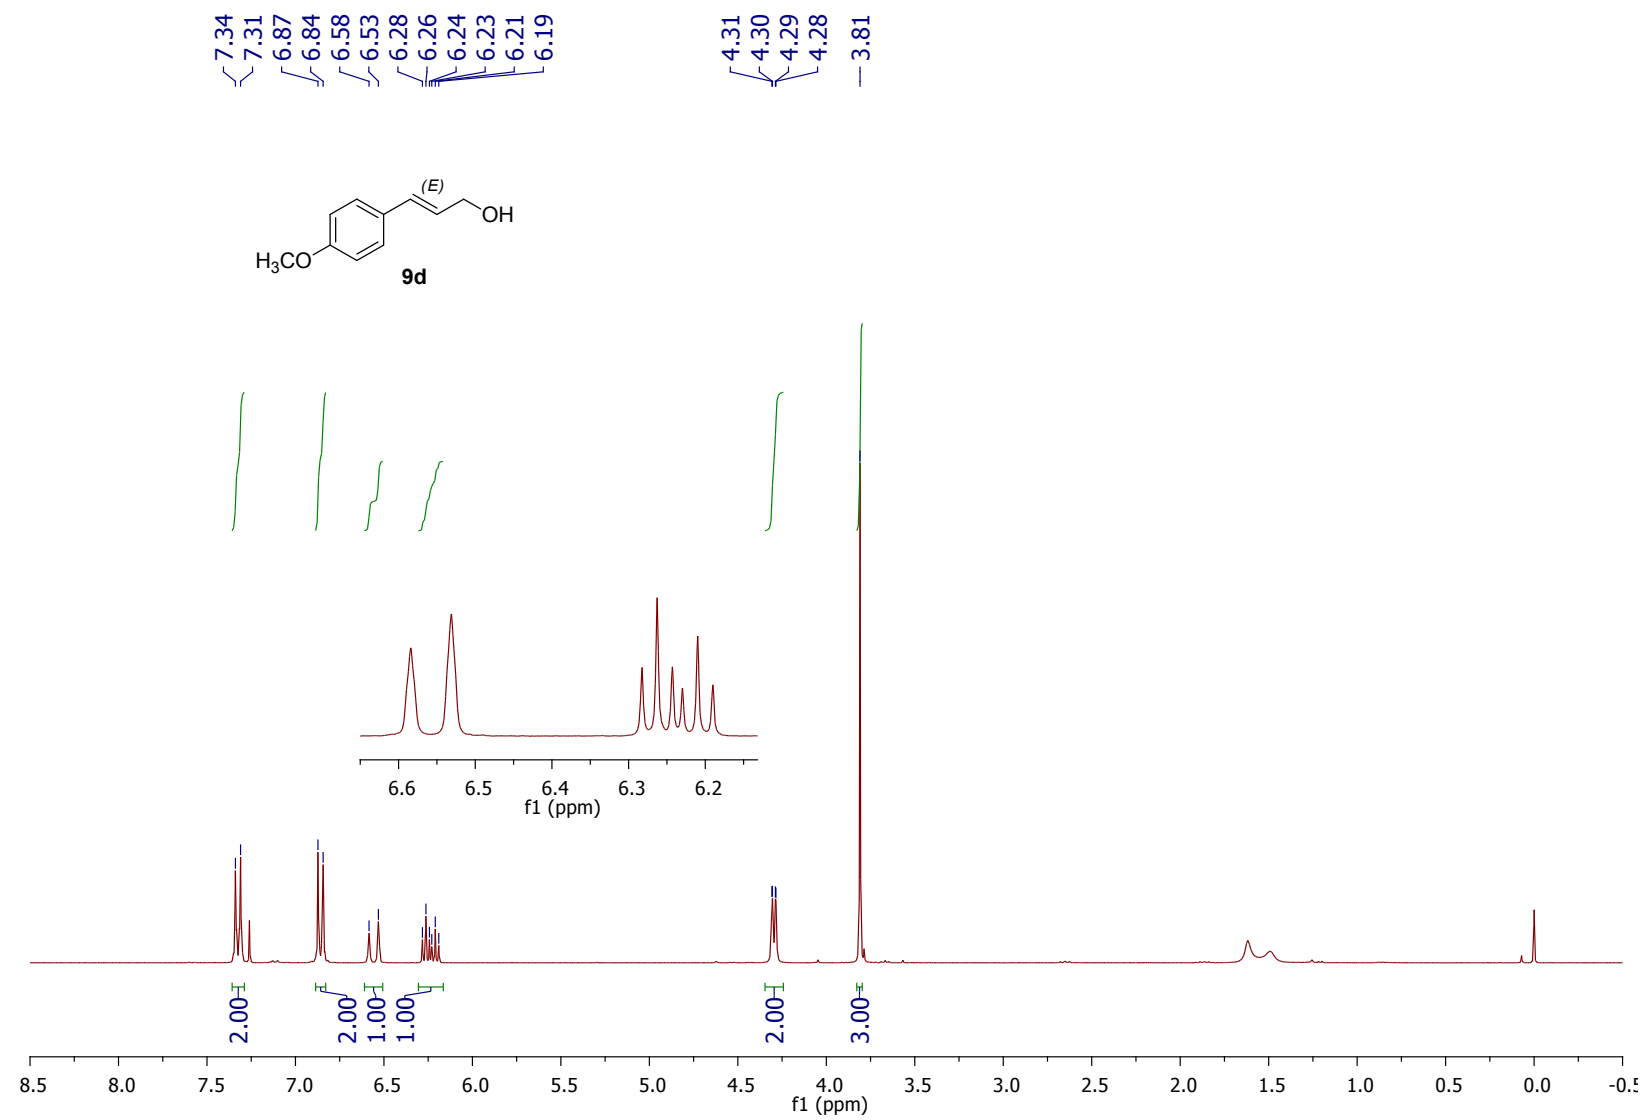





<sup>1</sup>H NMR (300 MHz, CDCl<sub>3</sub>) of substrate **9e**

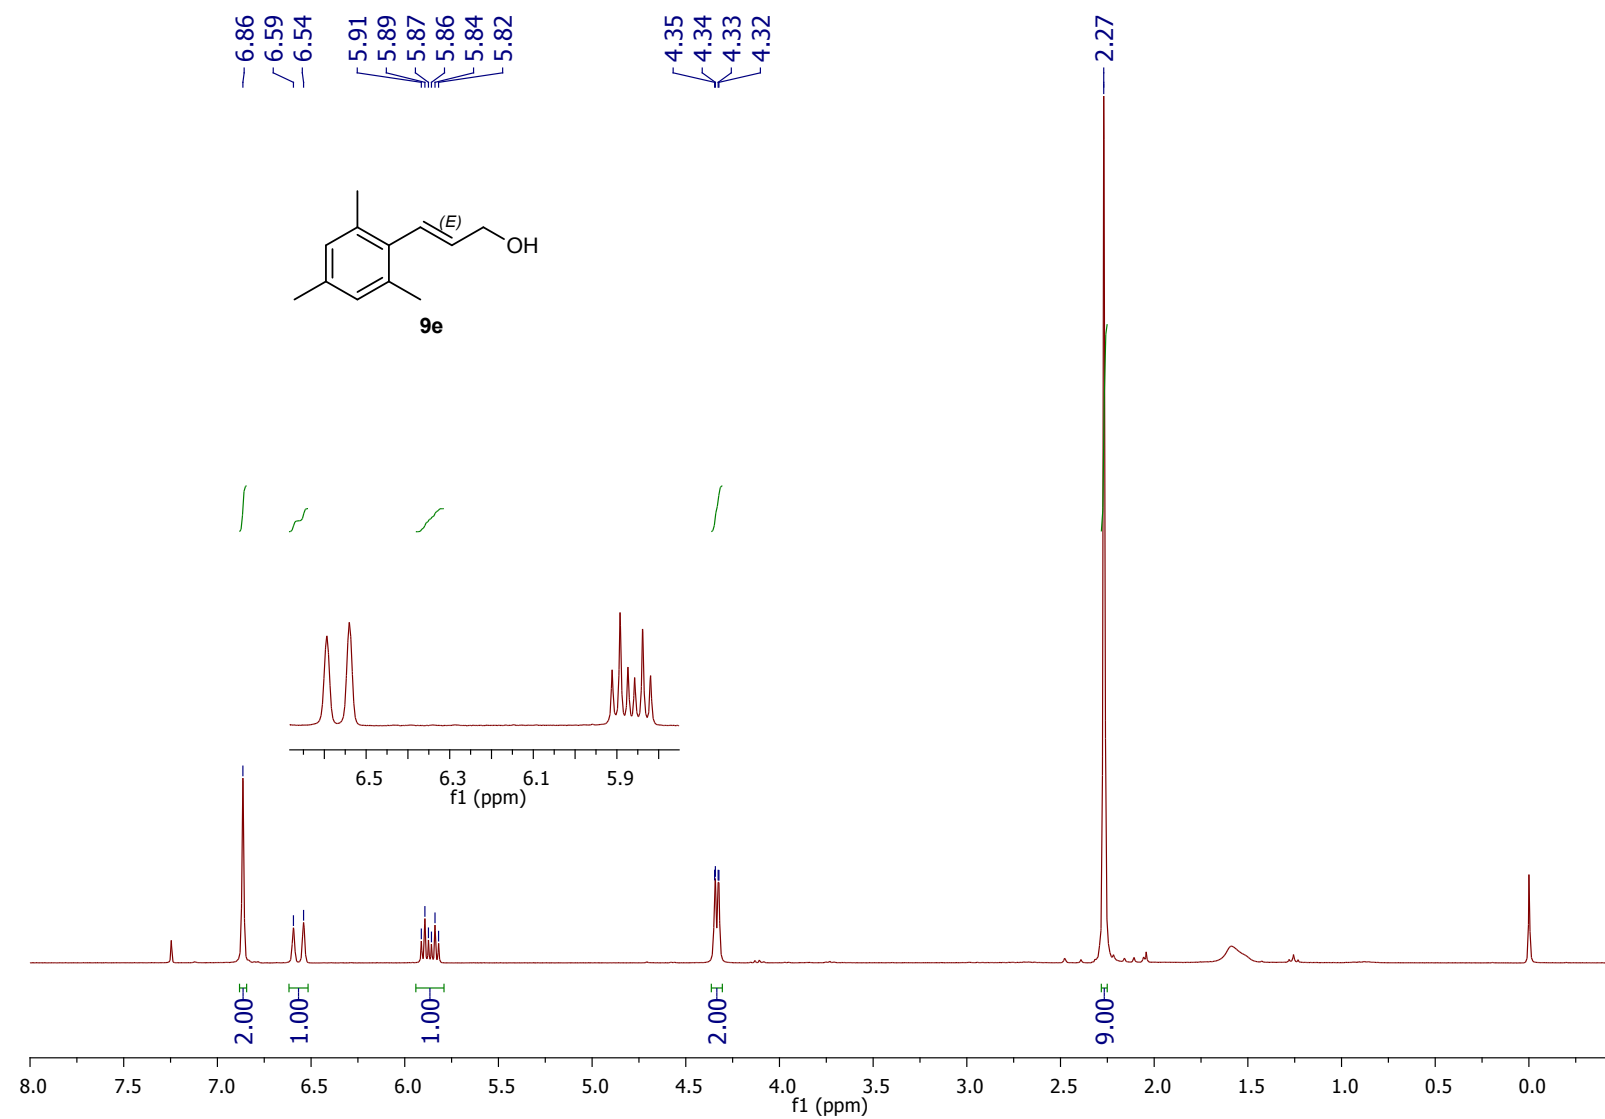

$^{13}\text{C}$  NMR (75 MHz,  $\text{CDCl}_3$ ) of substrate **9e**

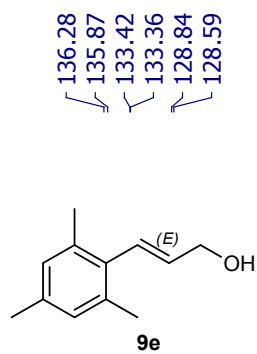

64.13

20.92  
20.89

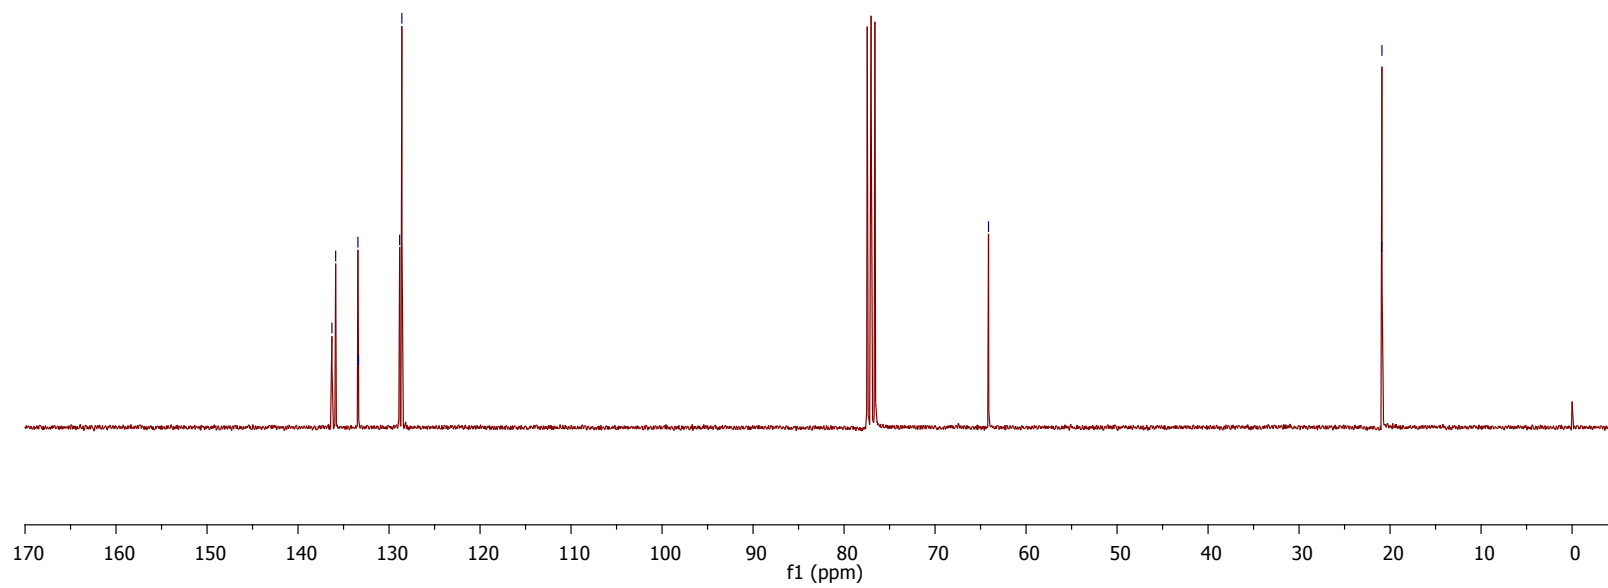

$^1\text{H}$  NMR (300 MHz,  $\text{CDCl}_3$ ) of substrate **9f**

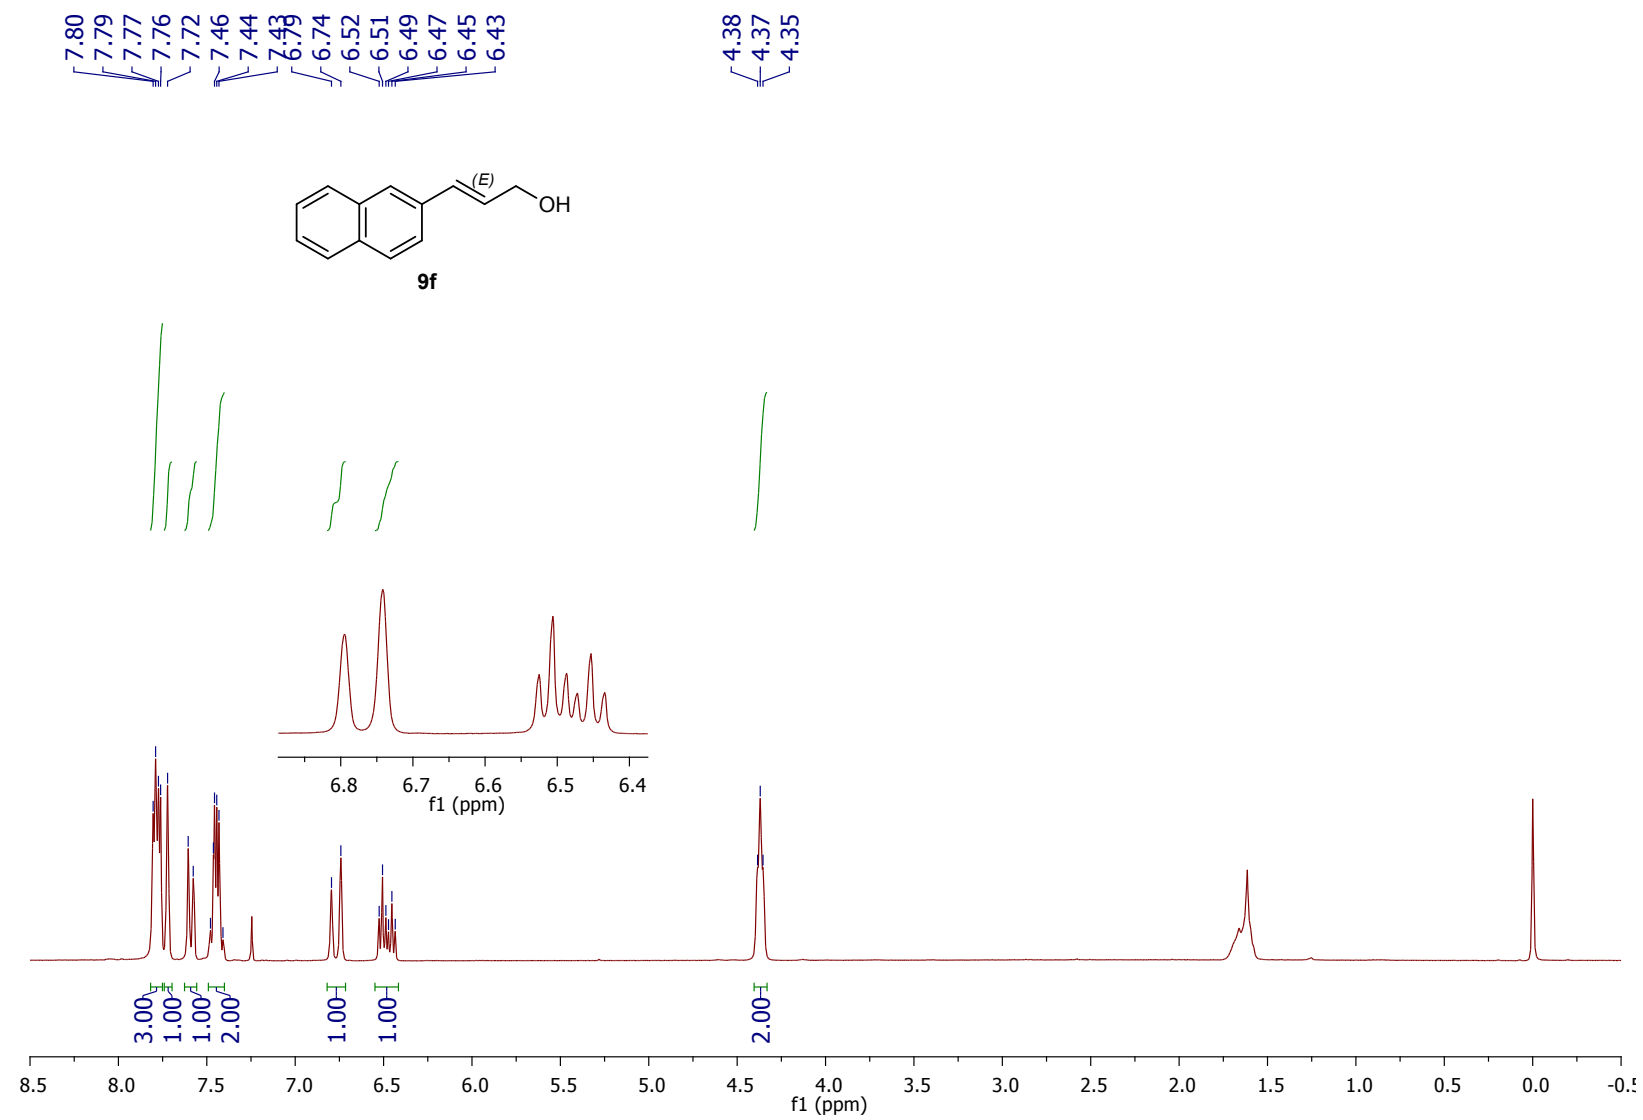

$^{13}\text{C}$  NMR (75 MHz,  $\text{CDCl}_3$ ) of substrate **9f**

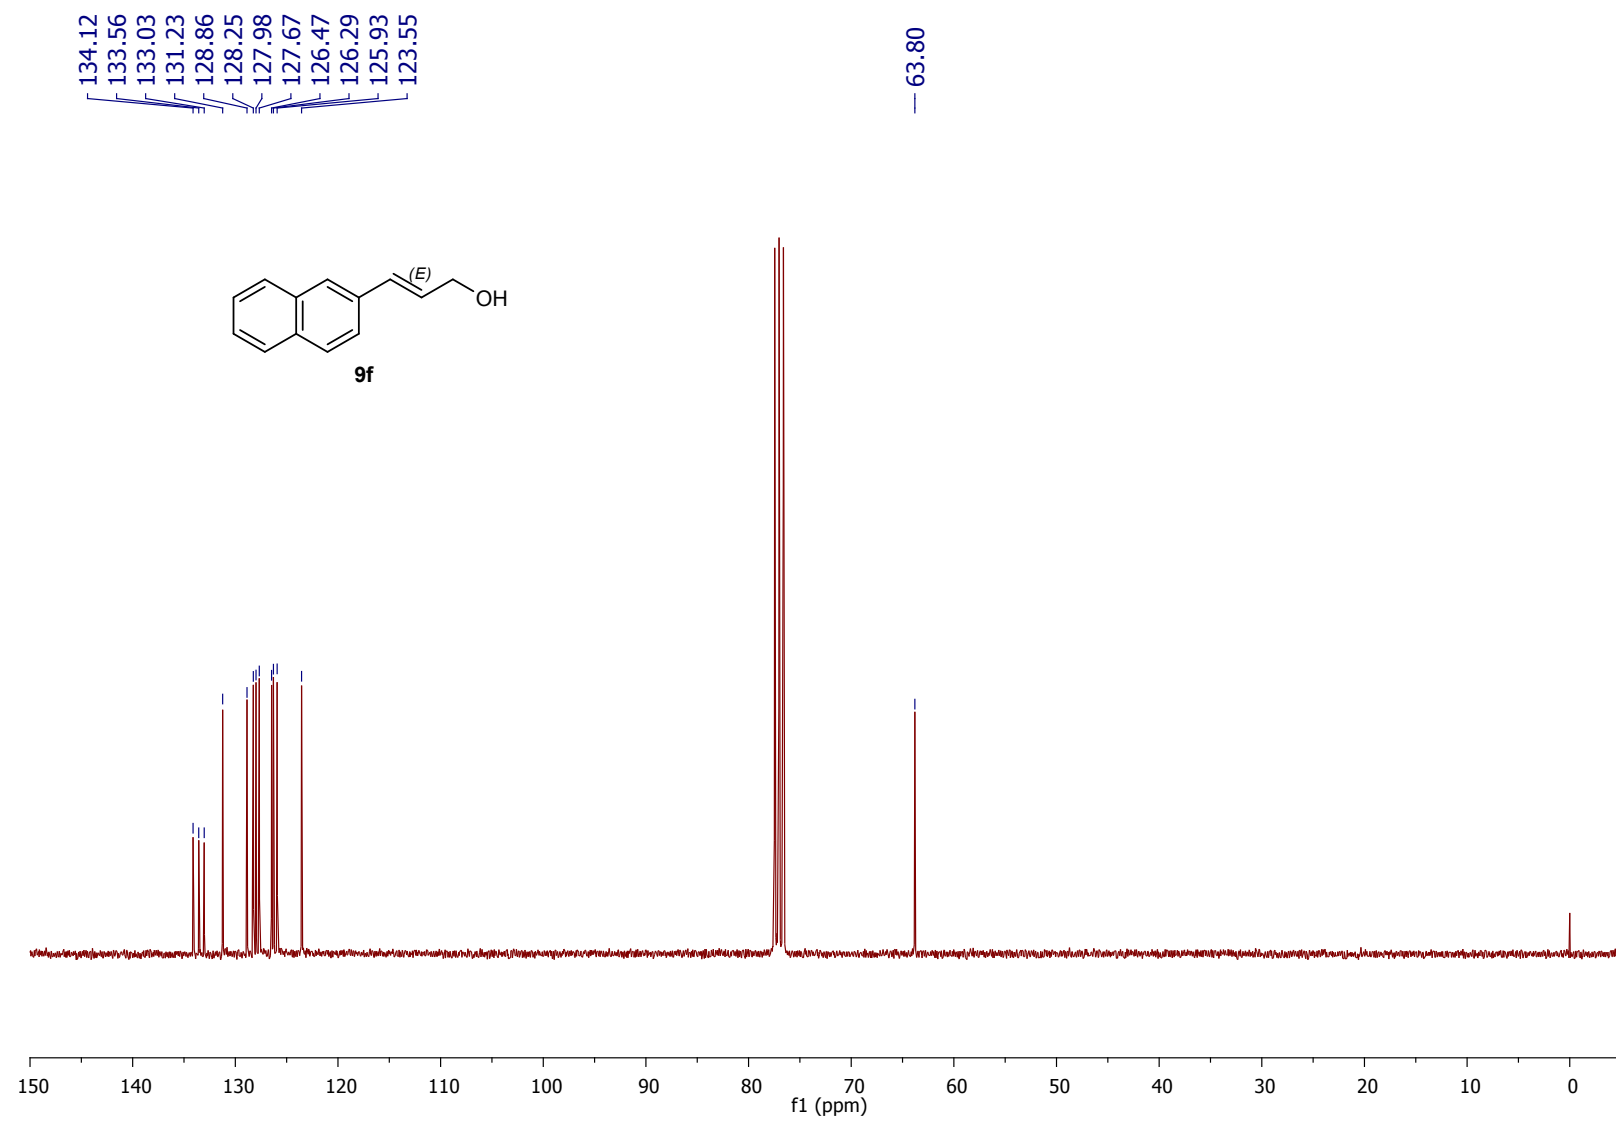

<sup>1</sup>H NMR (300 MHz, CDCl<sub>3</sub>) of substrate **9g**

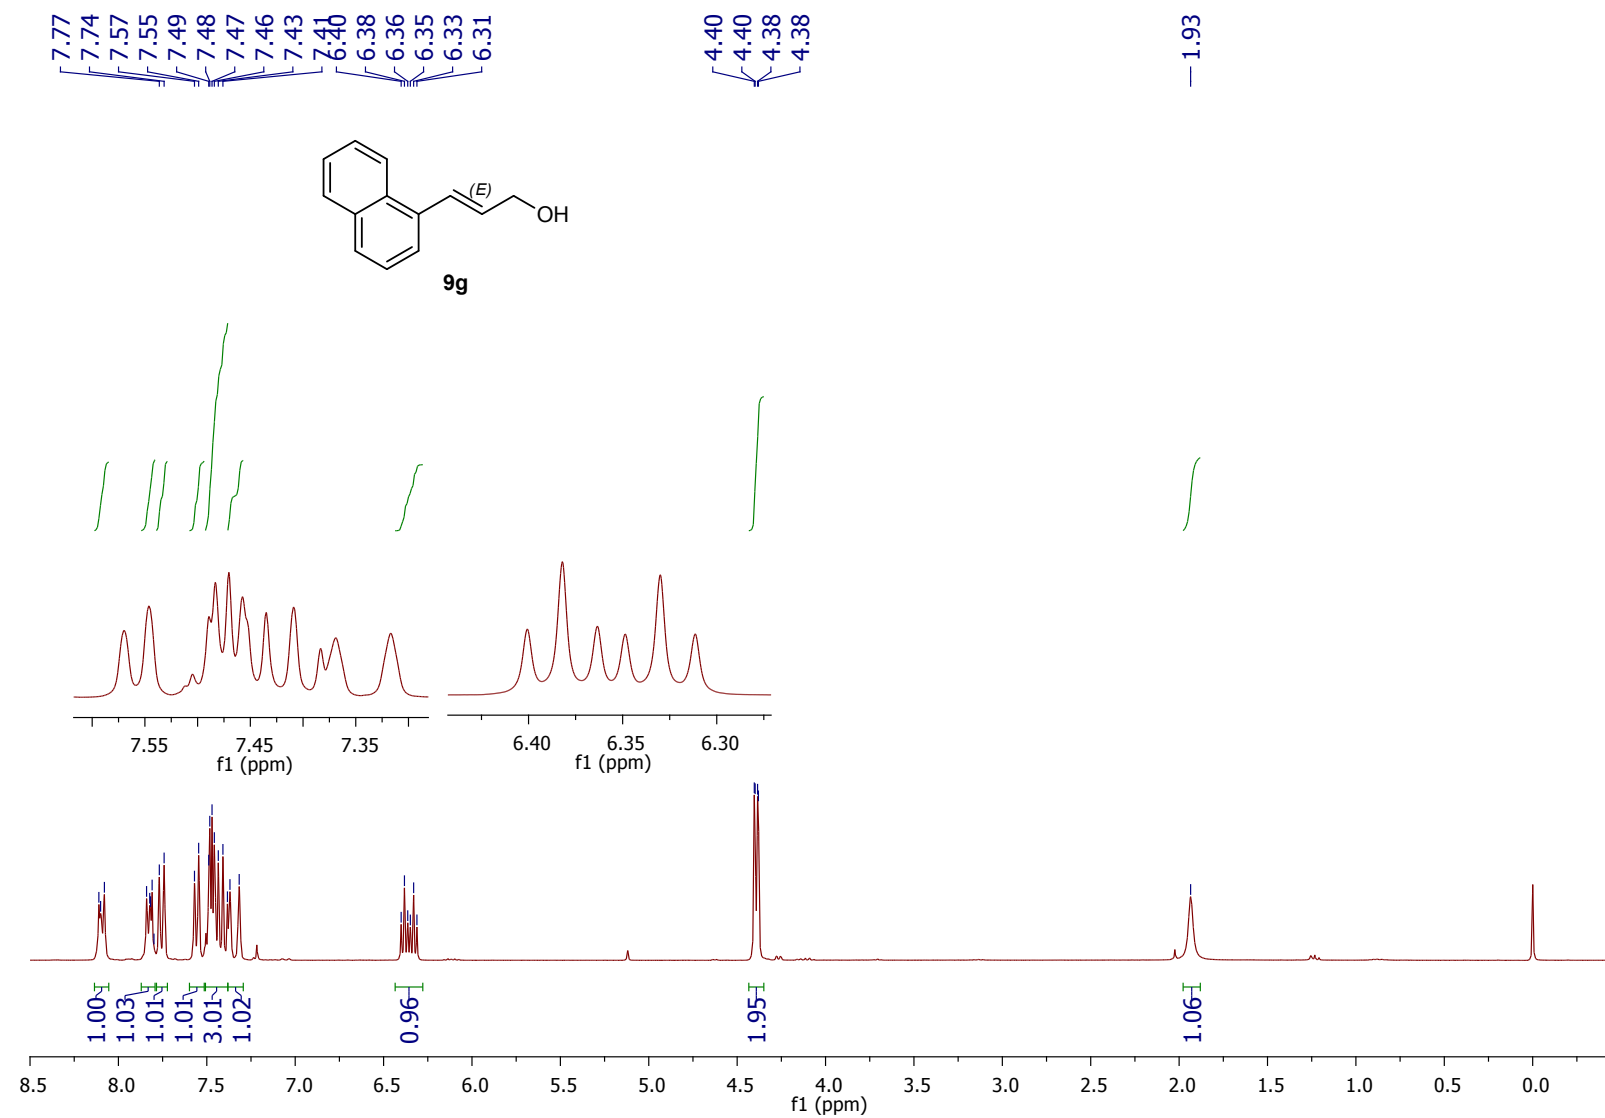

<sup>13</sup>C NMR (75 MHz, CDCl<sub>3</sub>) of substrate **9g**

134.42  
133.57  
131.76  
131.12  
128.51  
128.07  
127.99  
126.03  
125.77  
125.59  
123.88  
123.72

— 63.83

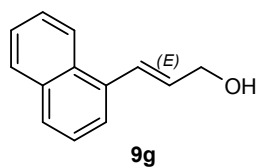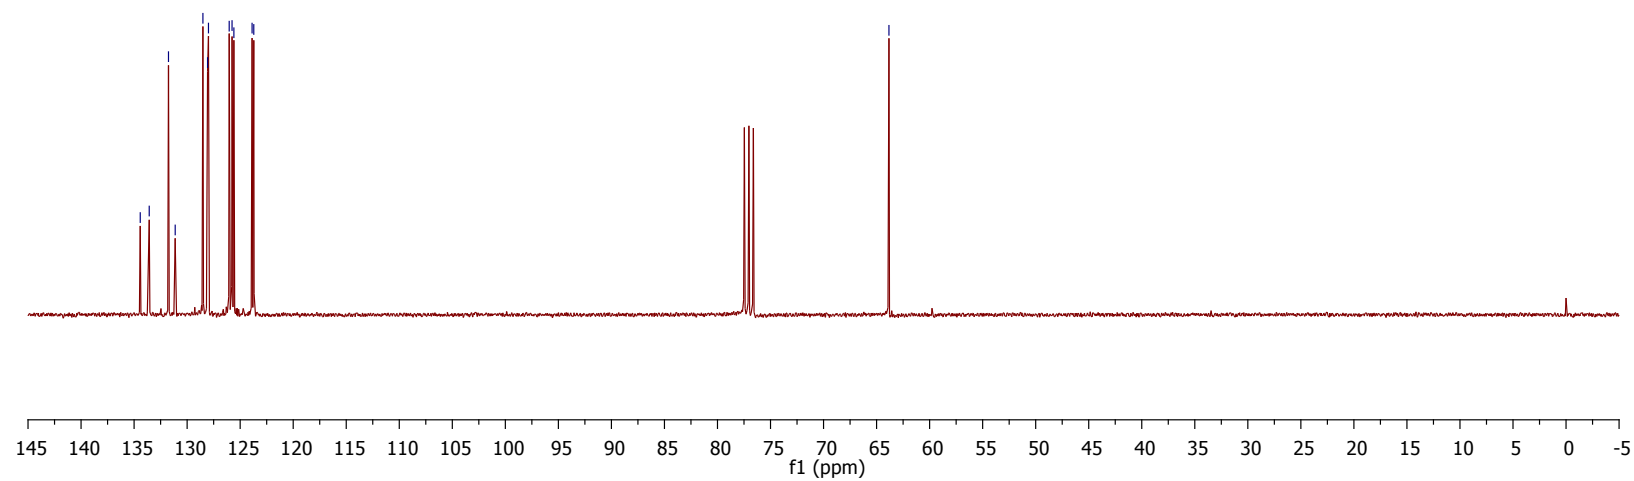

<sup>1</sup>H NMR (300 MHz, CDCl<sub>3</sub>) of substrate **9h**

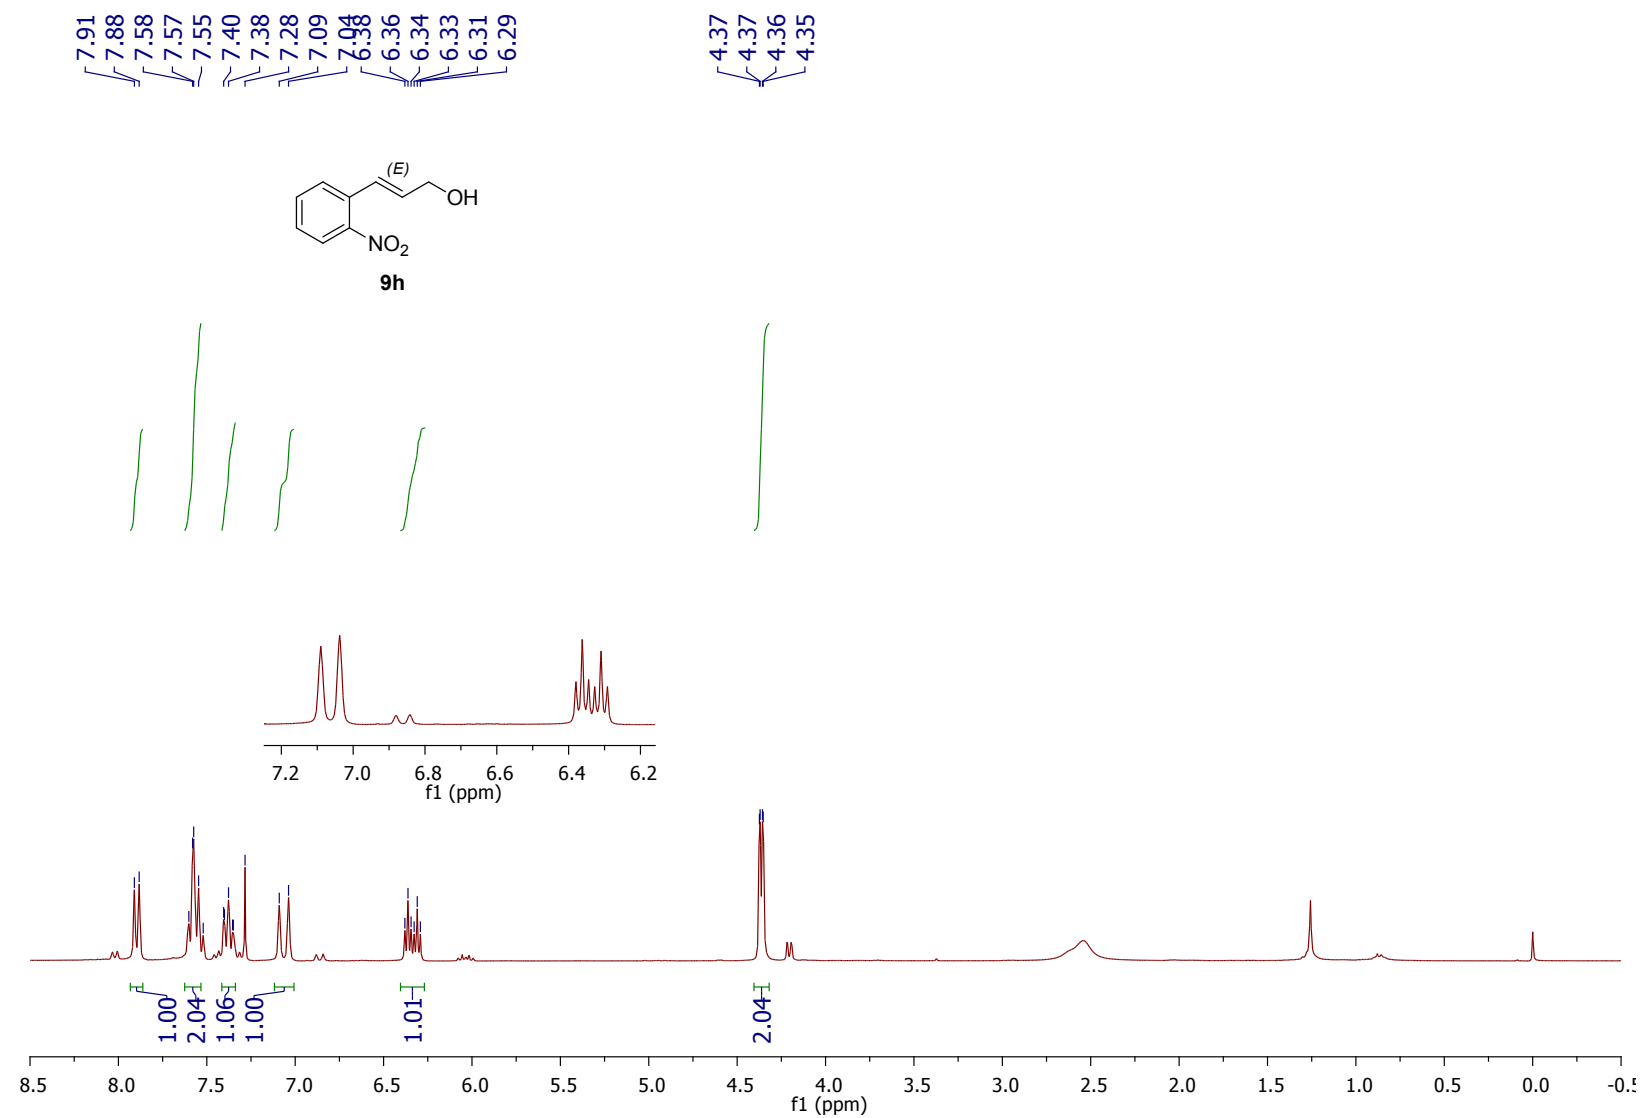



$^{13}\text{C}$  NMR (75 MHz,  $\text{CDCl}_3$ ) of substrate **9h**

— 147.78

134.27

133.14

132.55

128.77

128.10

125.65

124.48

— 63.12

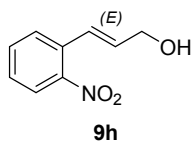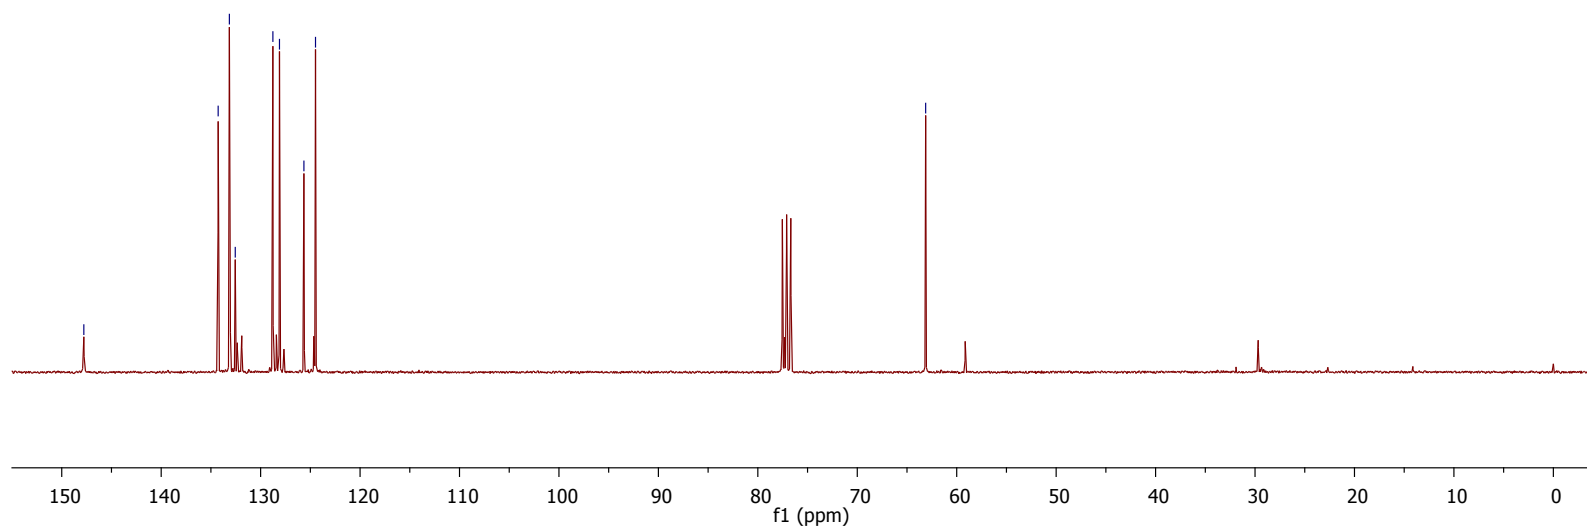

$^1\text{H}$  NMR (300 MHz,  $\text{CDCl}_3$ ) of substrate **9i**

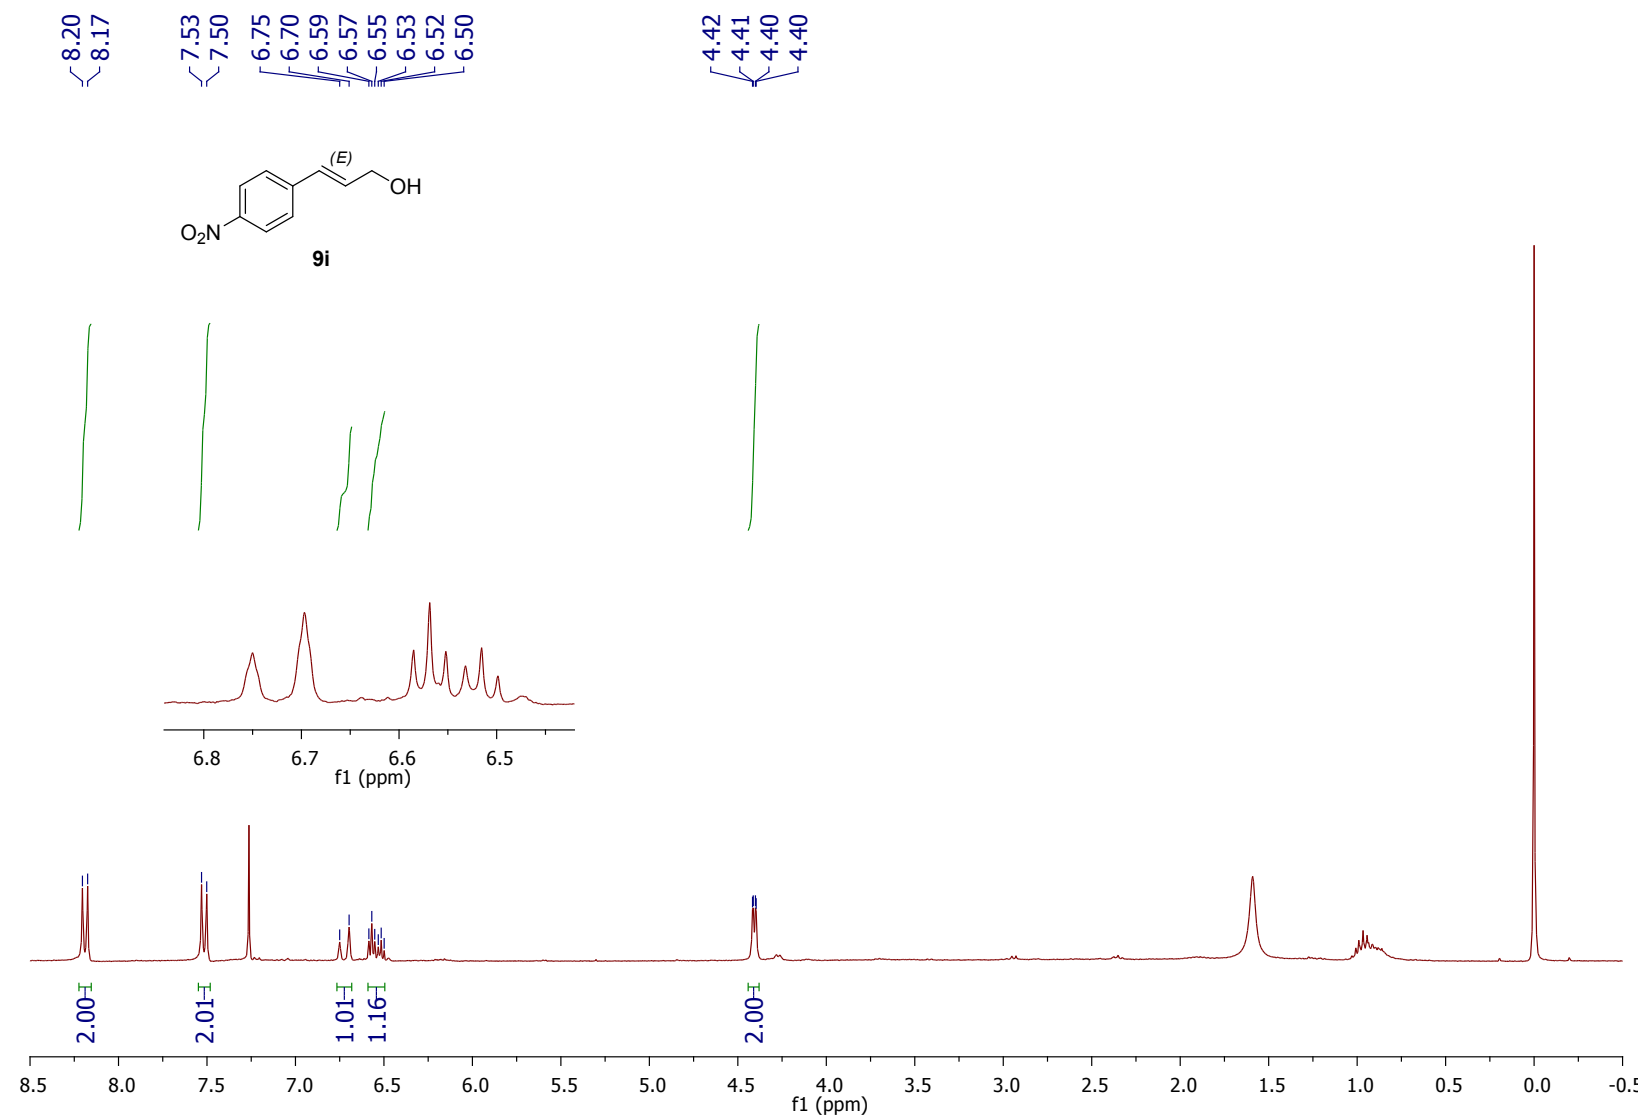

<sup>1</sup>H NMR (300 MHz, CDCl<sub>3</sub>) of substrate **9j**

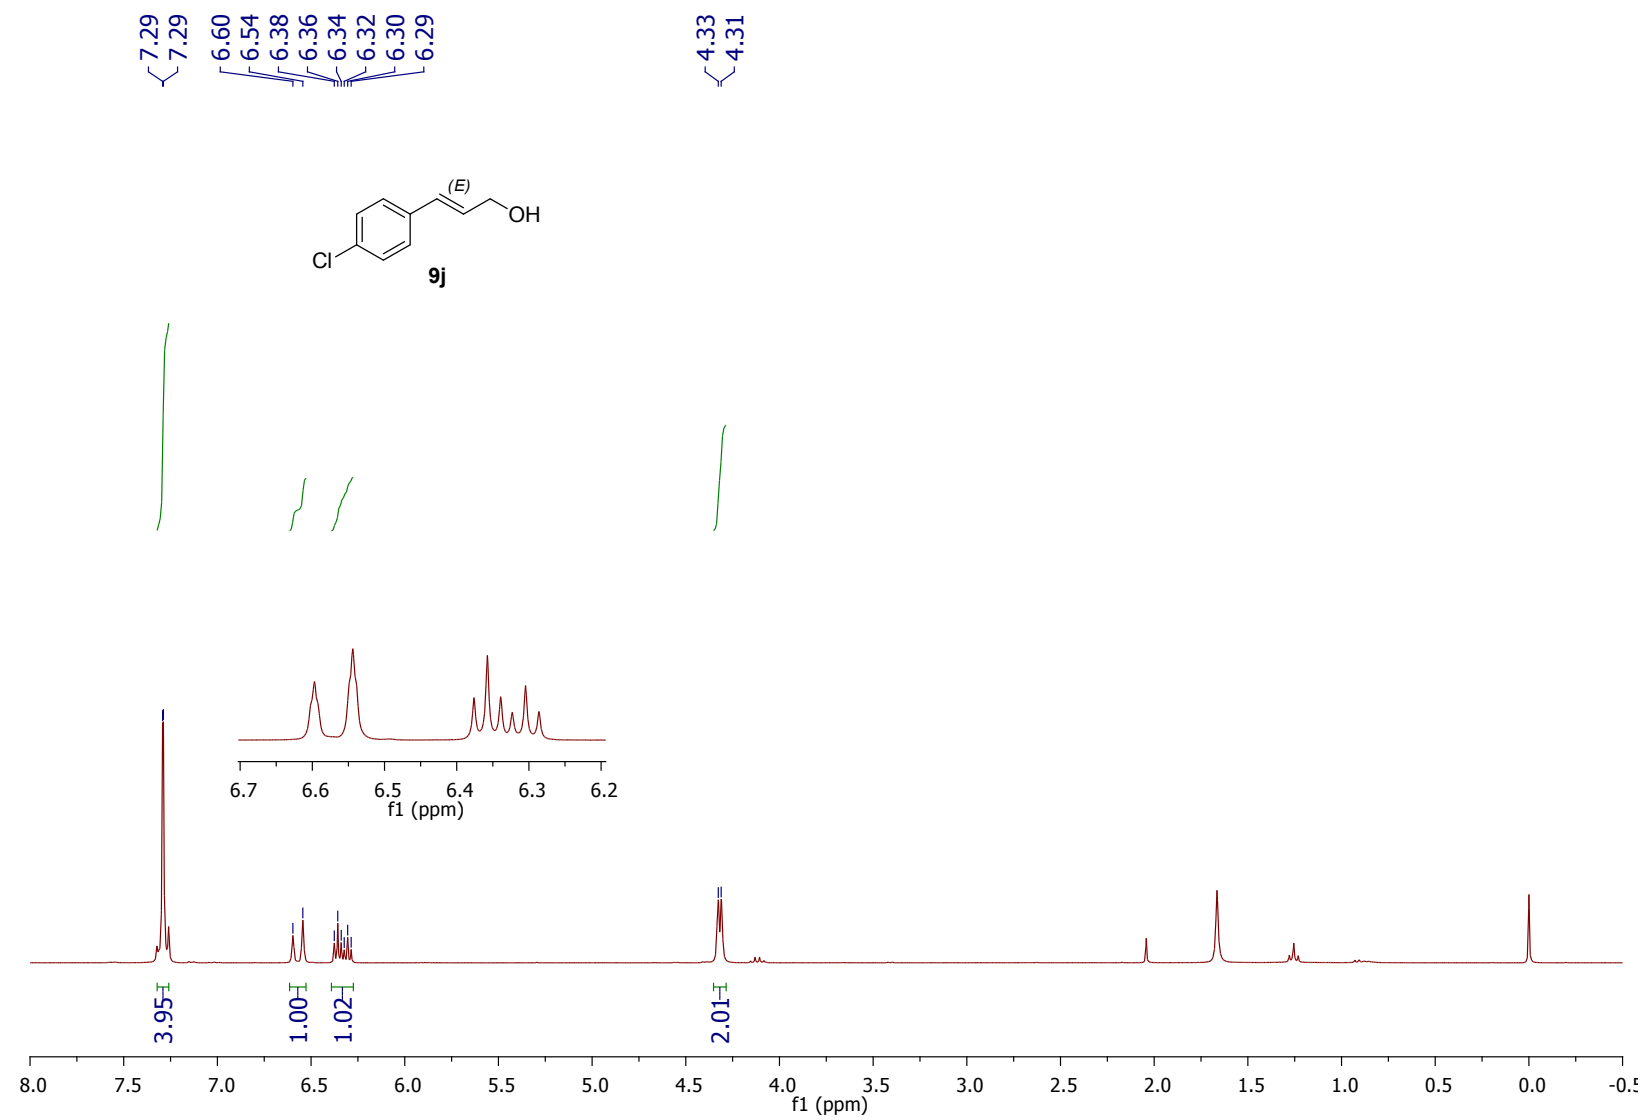

<sup>13</sup>C NMR (75 MHz, CDCl<sub>3</sub>) of substrate **9j**

135.19  
133.30  
129.76  
129.18  
128.76  
127.66

— 63.51

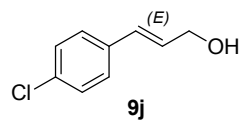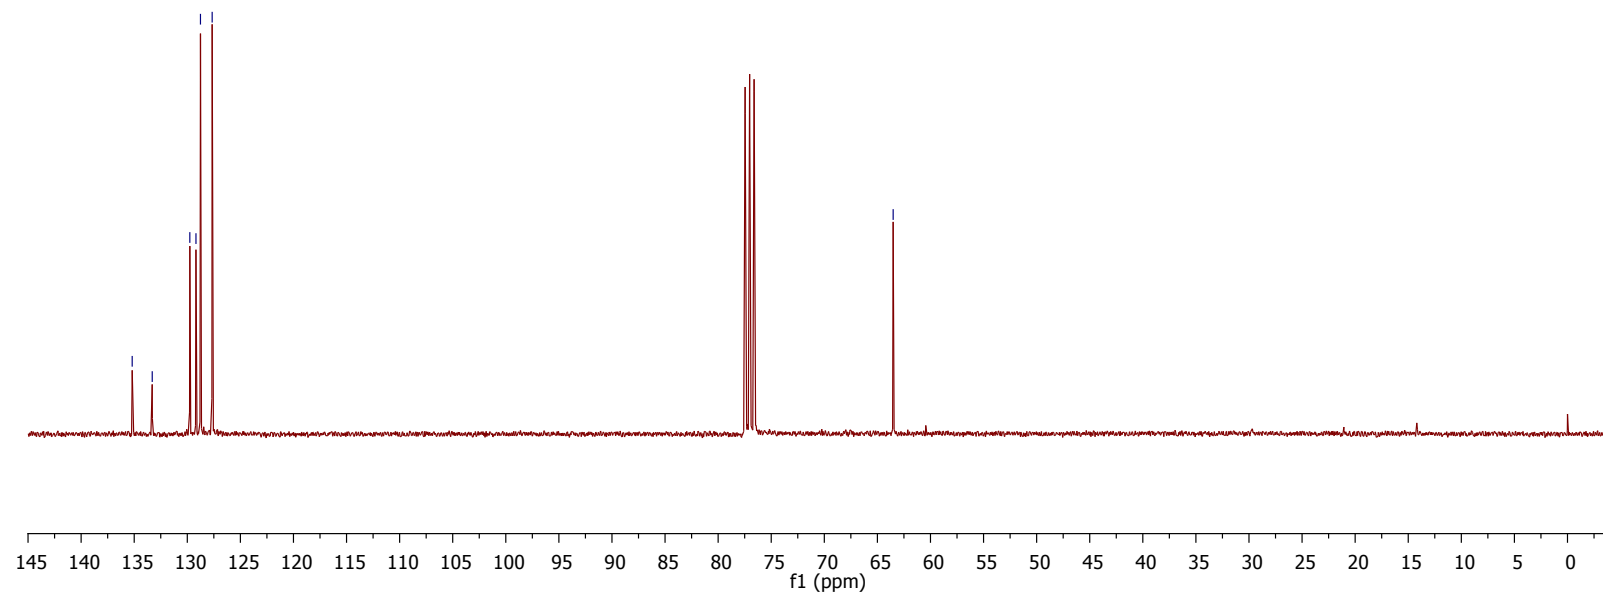

<sup>1</sup>H NMR (300 MHz, CDCl<sub>3</sub>) of substrate **9k**

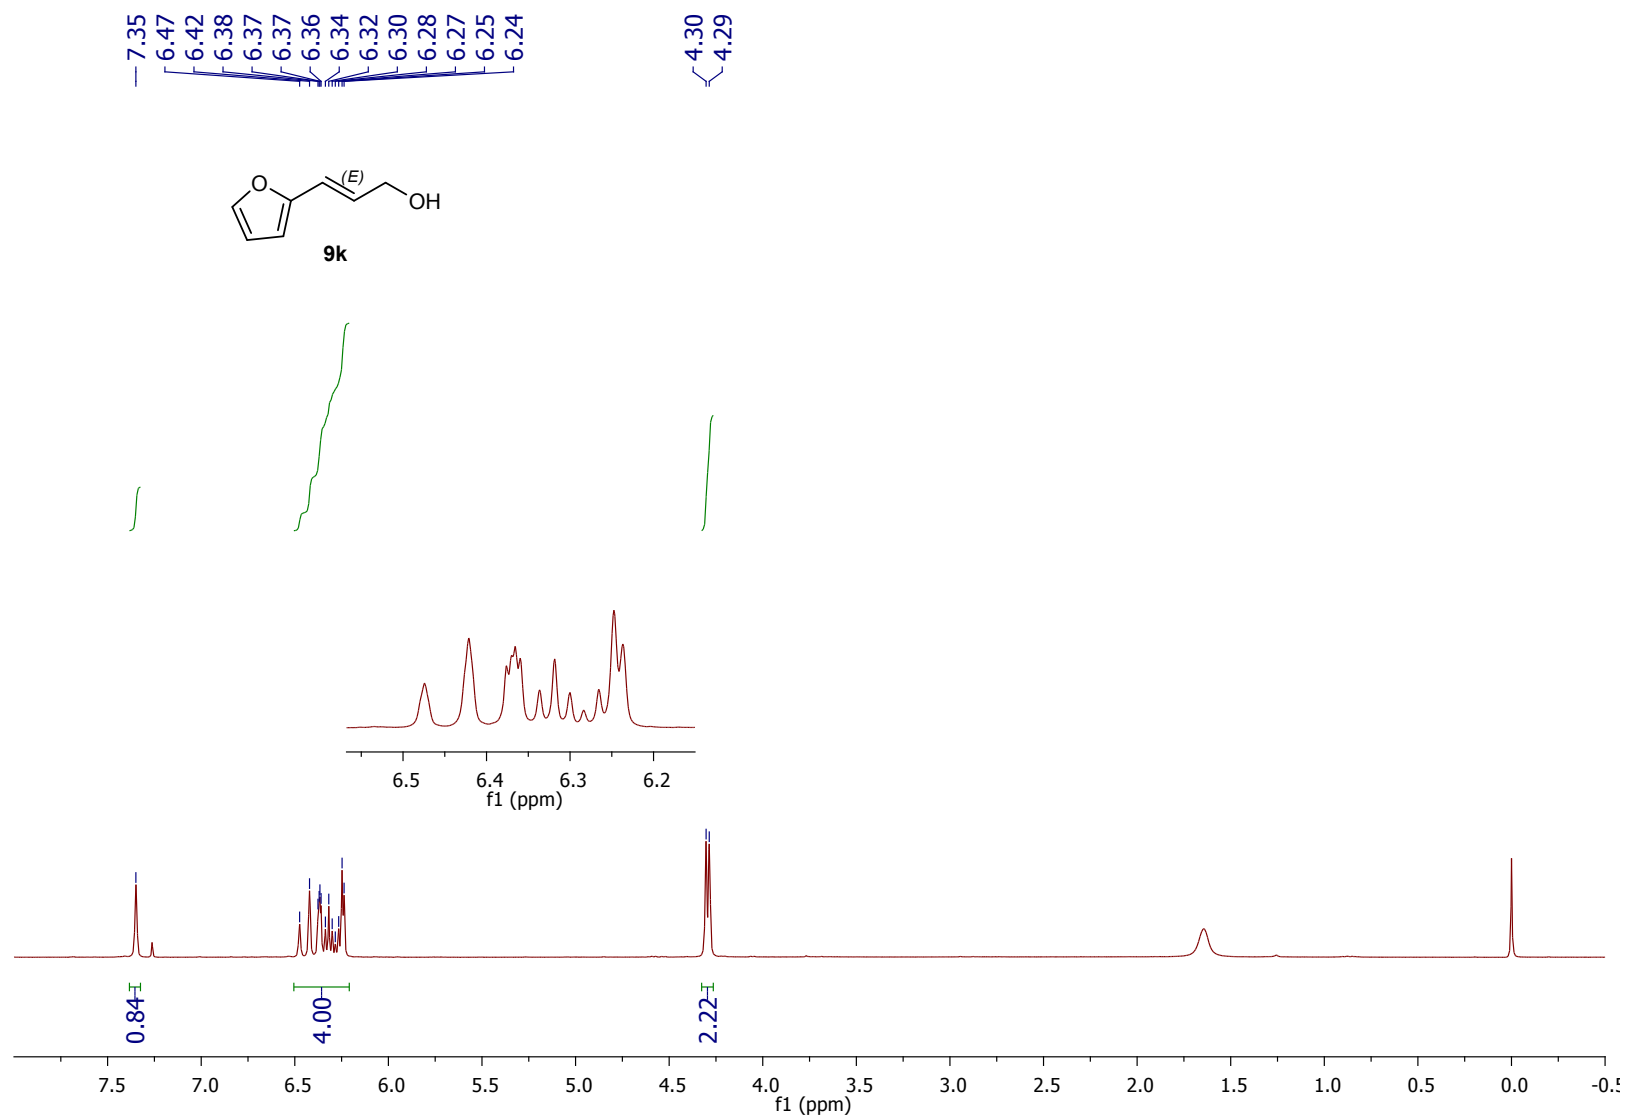

<sup>13</sup>C NMR (75 MHz, CDCl<sub>3</sub>) of substrate **9k**

— 152.38  
— 142.04  
— 127.19  
— 119.30  
— 111.28  
— 108.01  
  
— 63.27

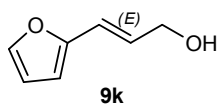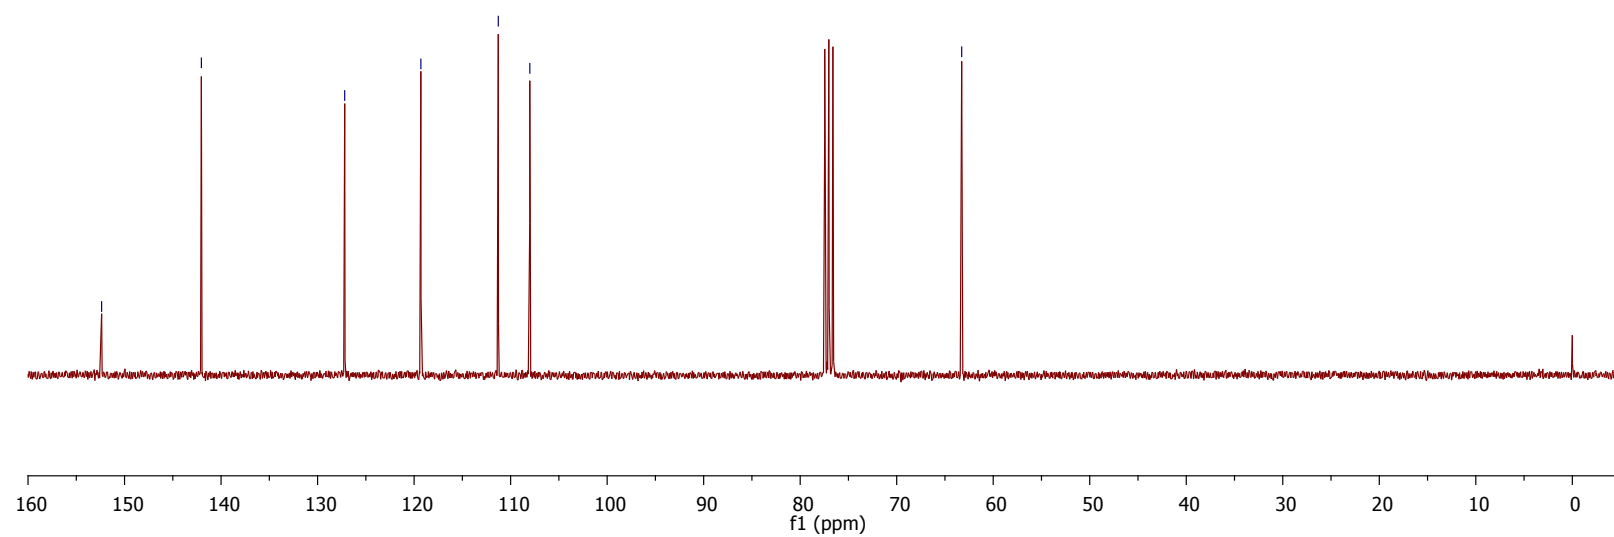

<sup>1</sup>H NMR (300 MHz, CDCl<sub>3</sub>) of substrate **9l**

7.16  
7.15  
7.14  
6.96  
6.95  
6.76  
6.71  
6.23  
6.21  
6.20  
6.18  
6.16  
6.14  
4.28  
4.27  
4.26  
4.25

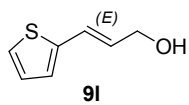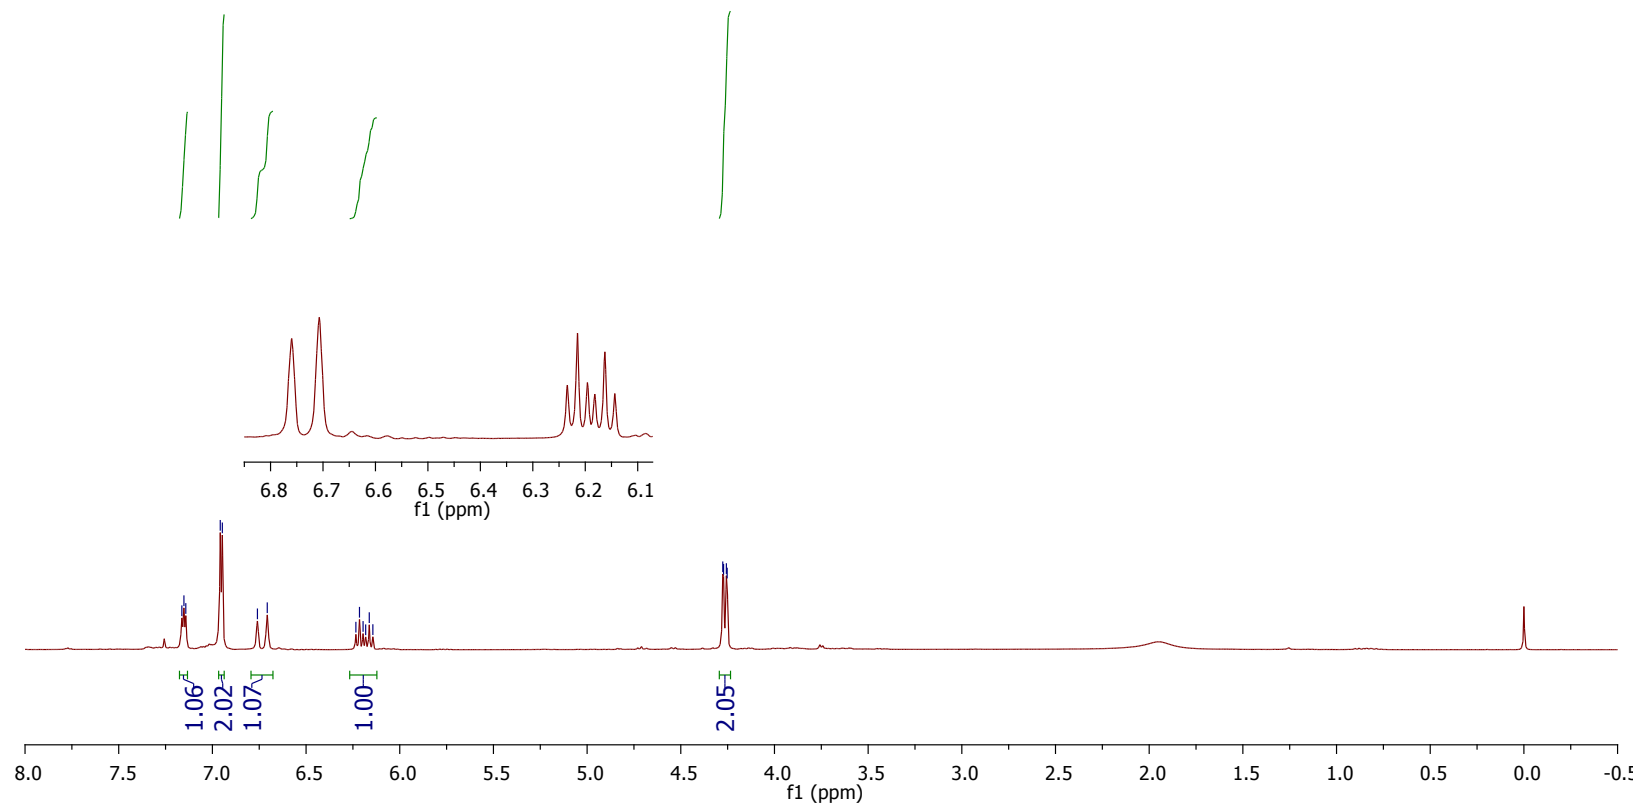

$^{13}\text{C}$  NMR (75 MHz,  $\text{CDCl}_3$ ) of substrate **9I**

— 141.77

128.11

127.38

125.83

124.39

124.32

— 63.31

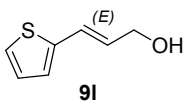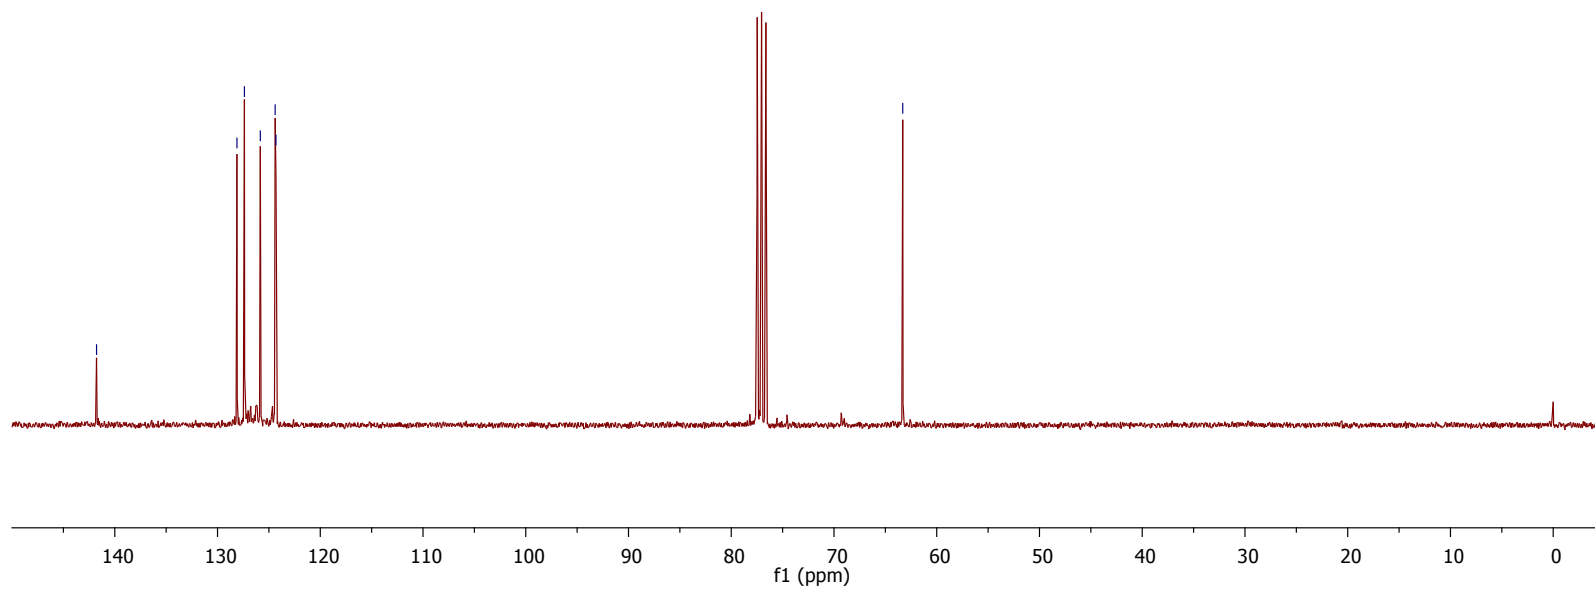



<sup>1</sup>H NMR (300 MHz, CDCl<sub>3</sub>) of substrate **9r**

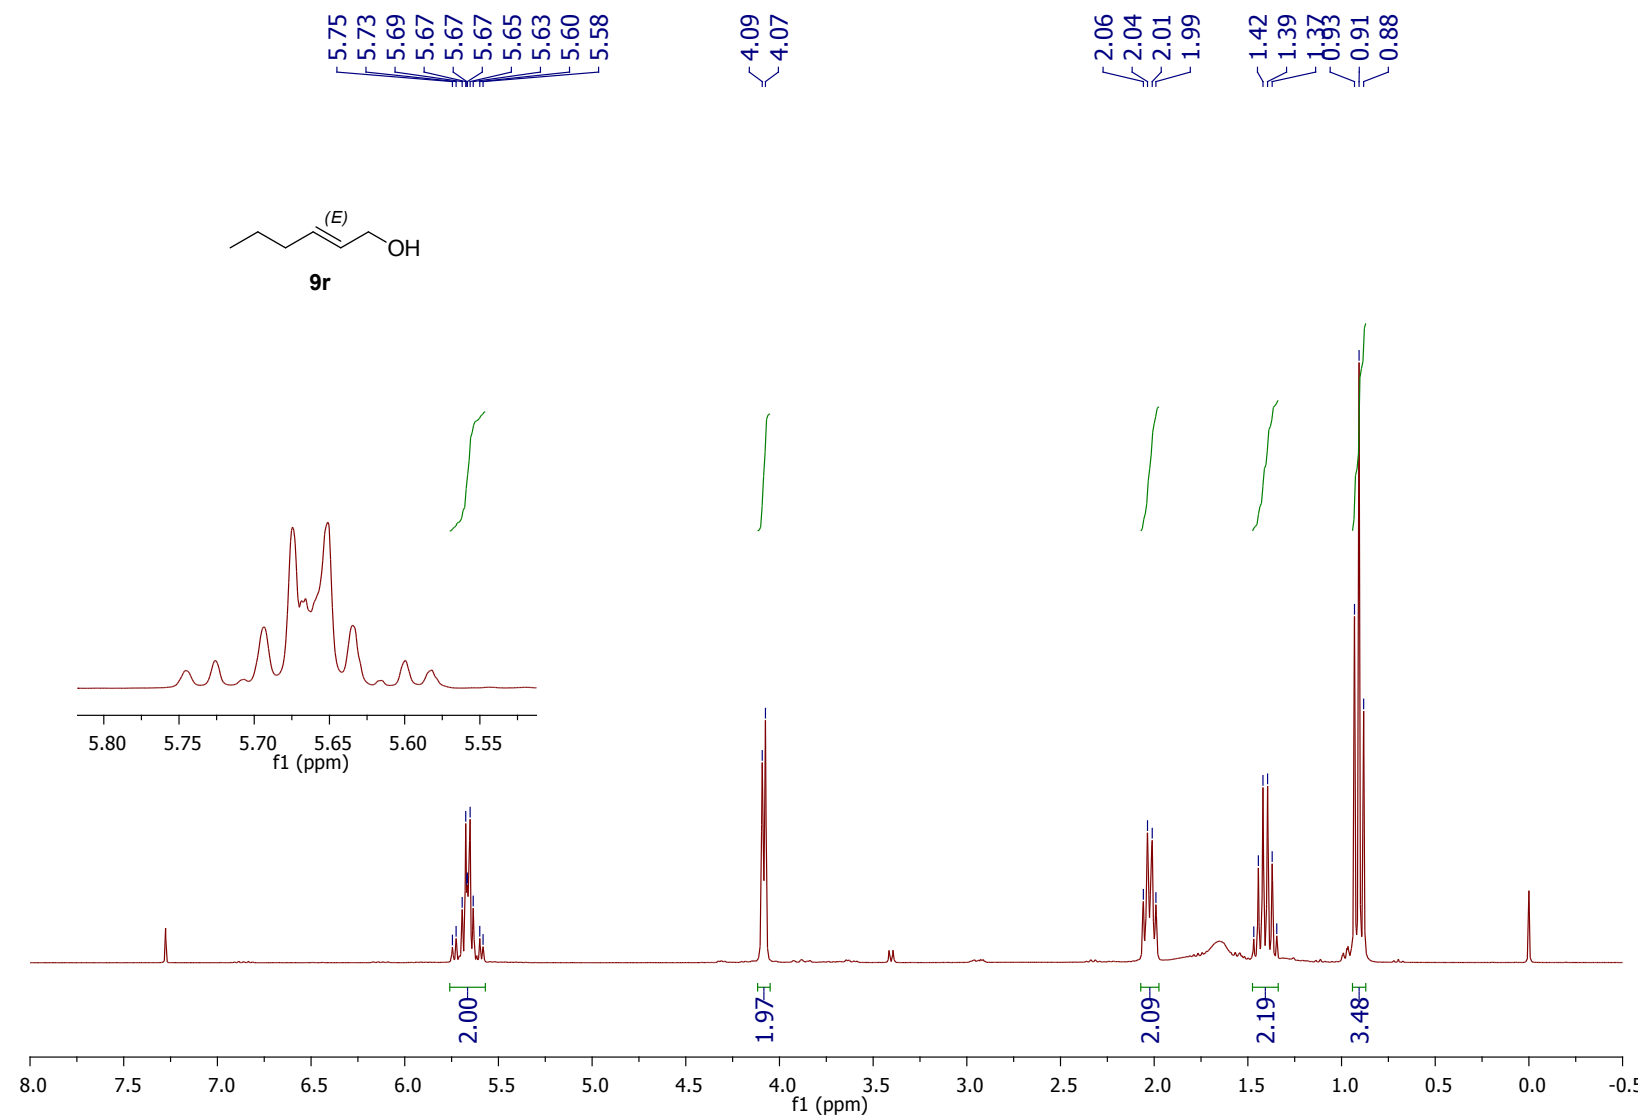

<sup>13</sup>C NMR (75 MHz, CDCl<sub>3</sub>) of substrate **9r**

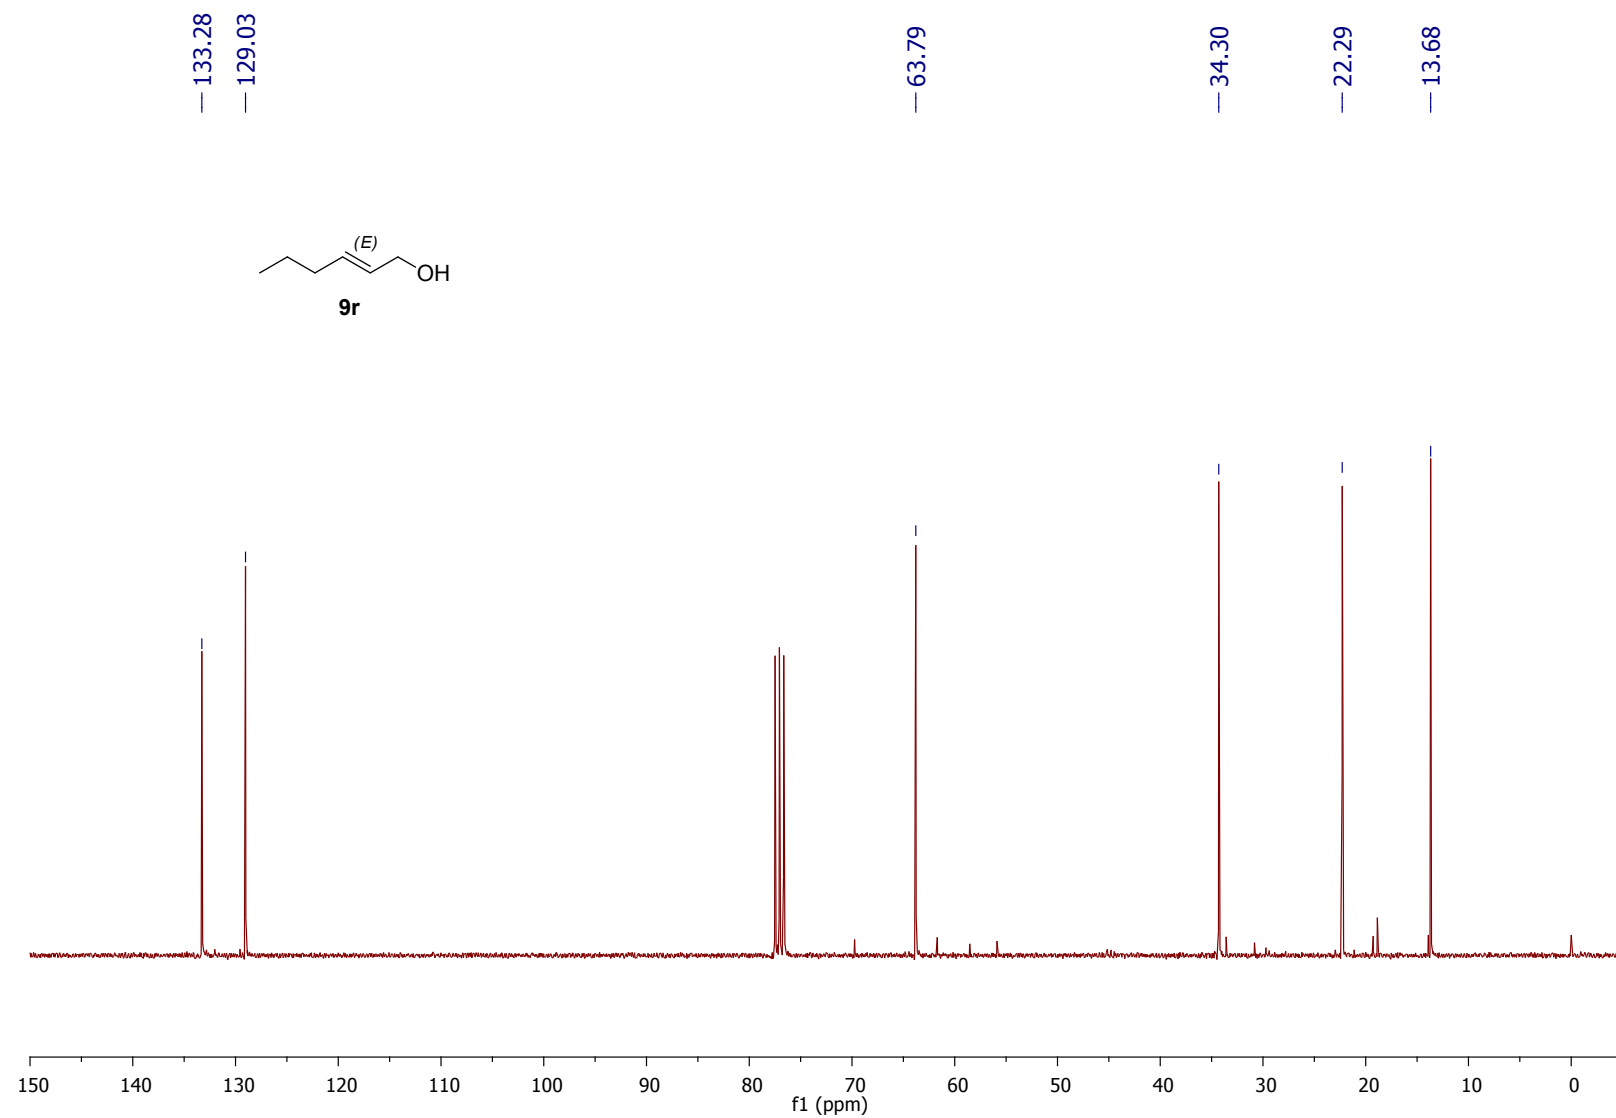

<sup>1</sup>H NMR (300 MHz, CDCl<sub>3</sub>) of substrate **1a**

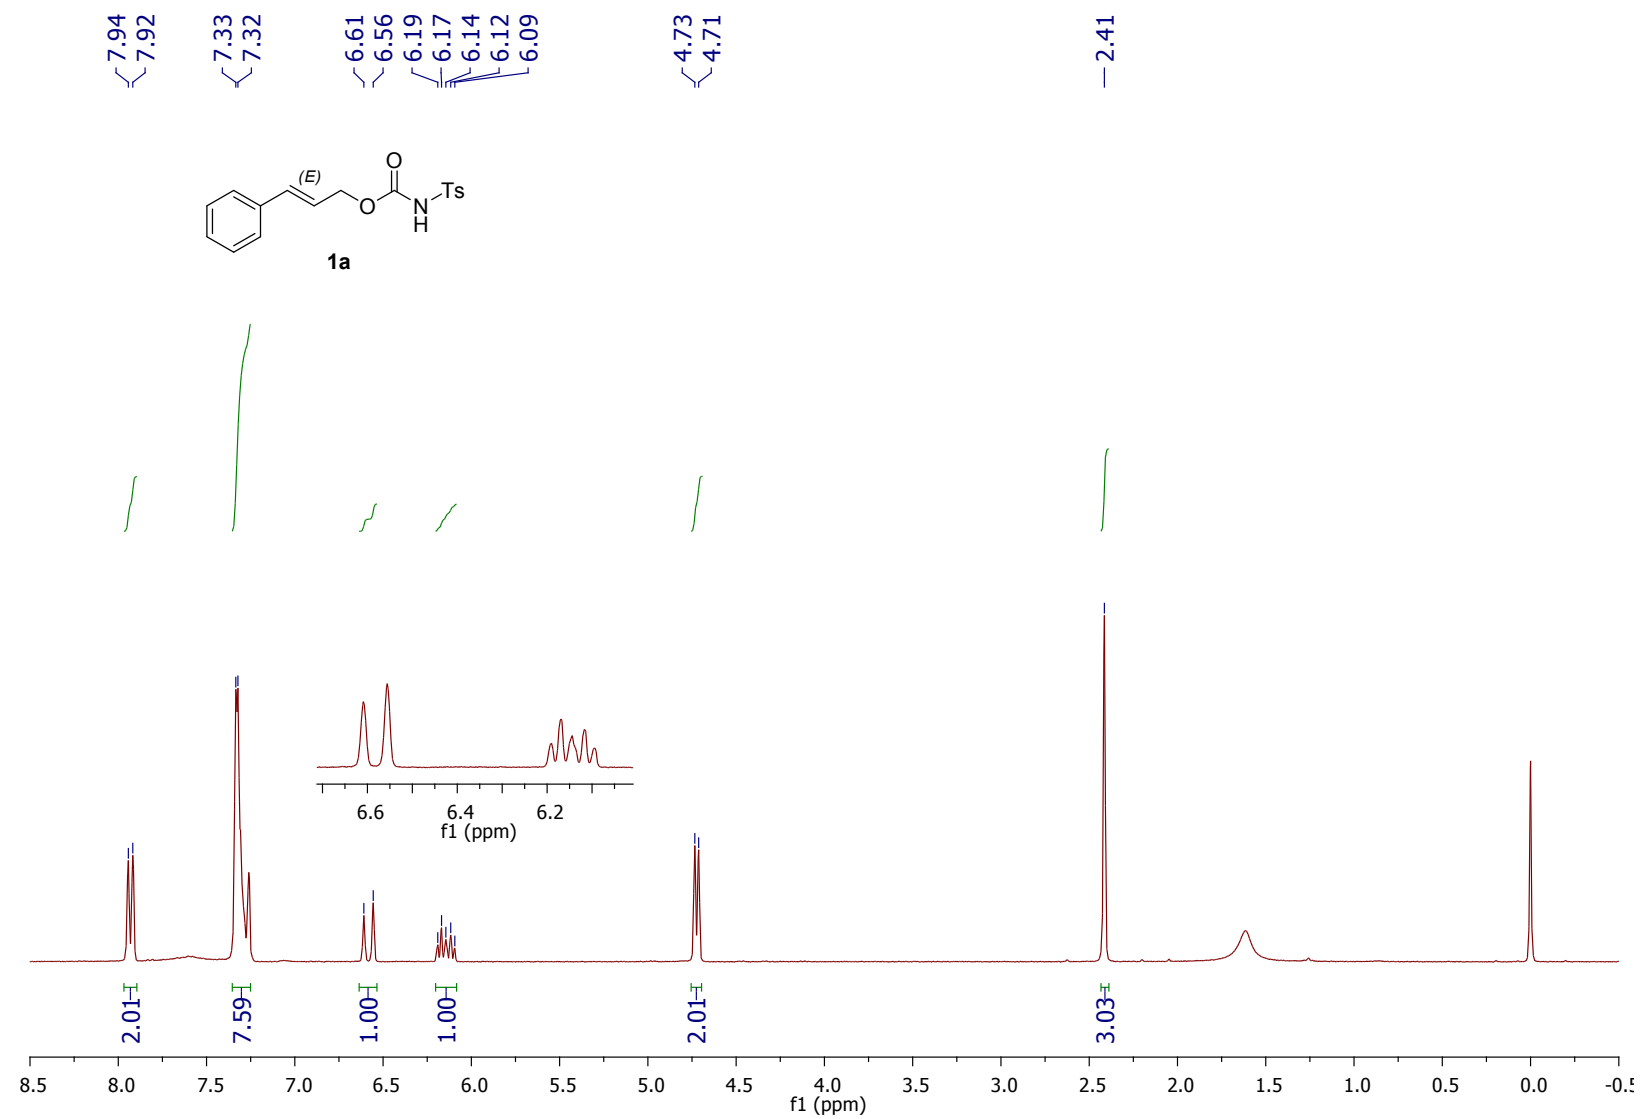

<sup>13</sup>C NMR (75 MHz, CDCl<sub>3</sub>) of substrate **1a**

— 150.19  
— 145.17  
— 135.75  
— 135.47  
— 135.42  
— 129.64  
— 128.66  
— 128.46  
— 128.40  
— 126.70  
— 121.58

— 67.38

— 21.67

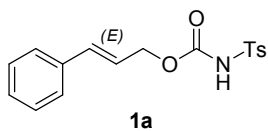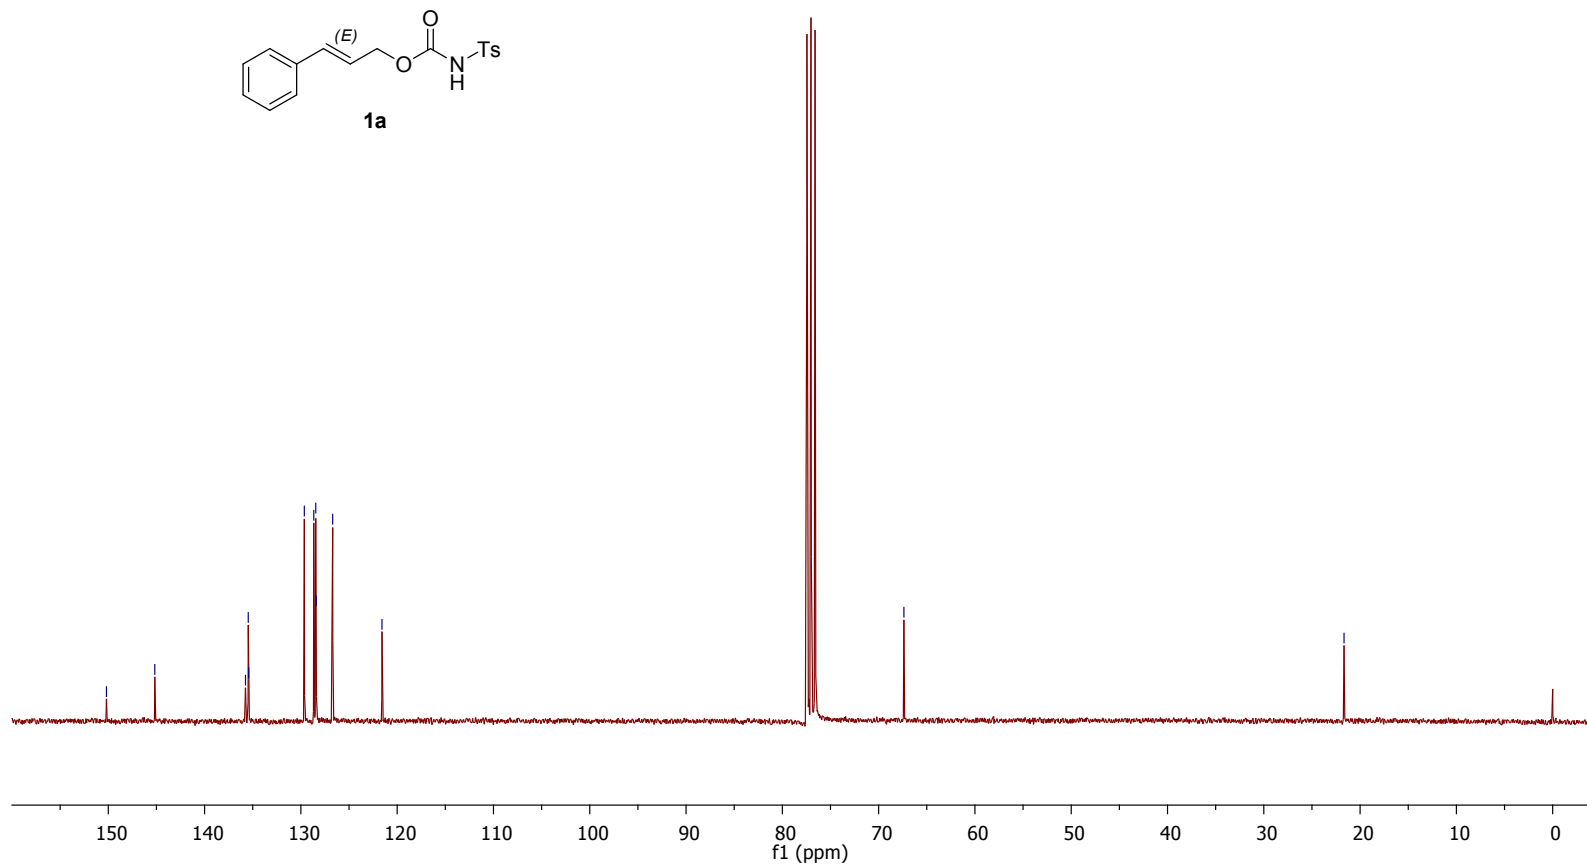

<sup>1</sup>H NMR (300 MHz, CDCl<sub>3</sub>) of substrate **1b**

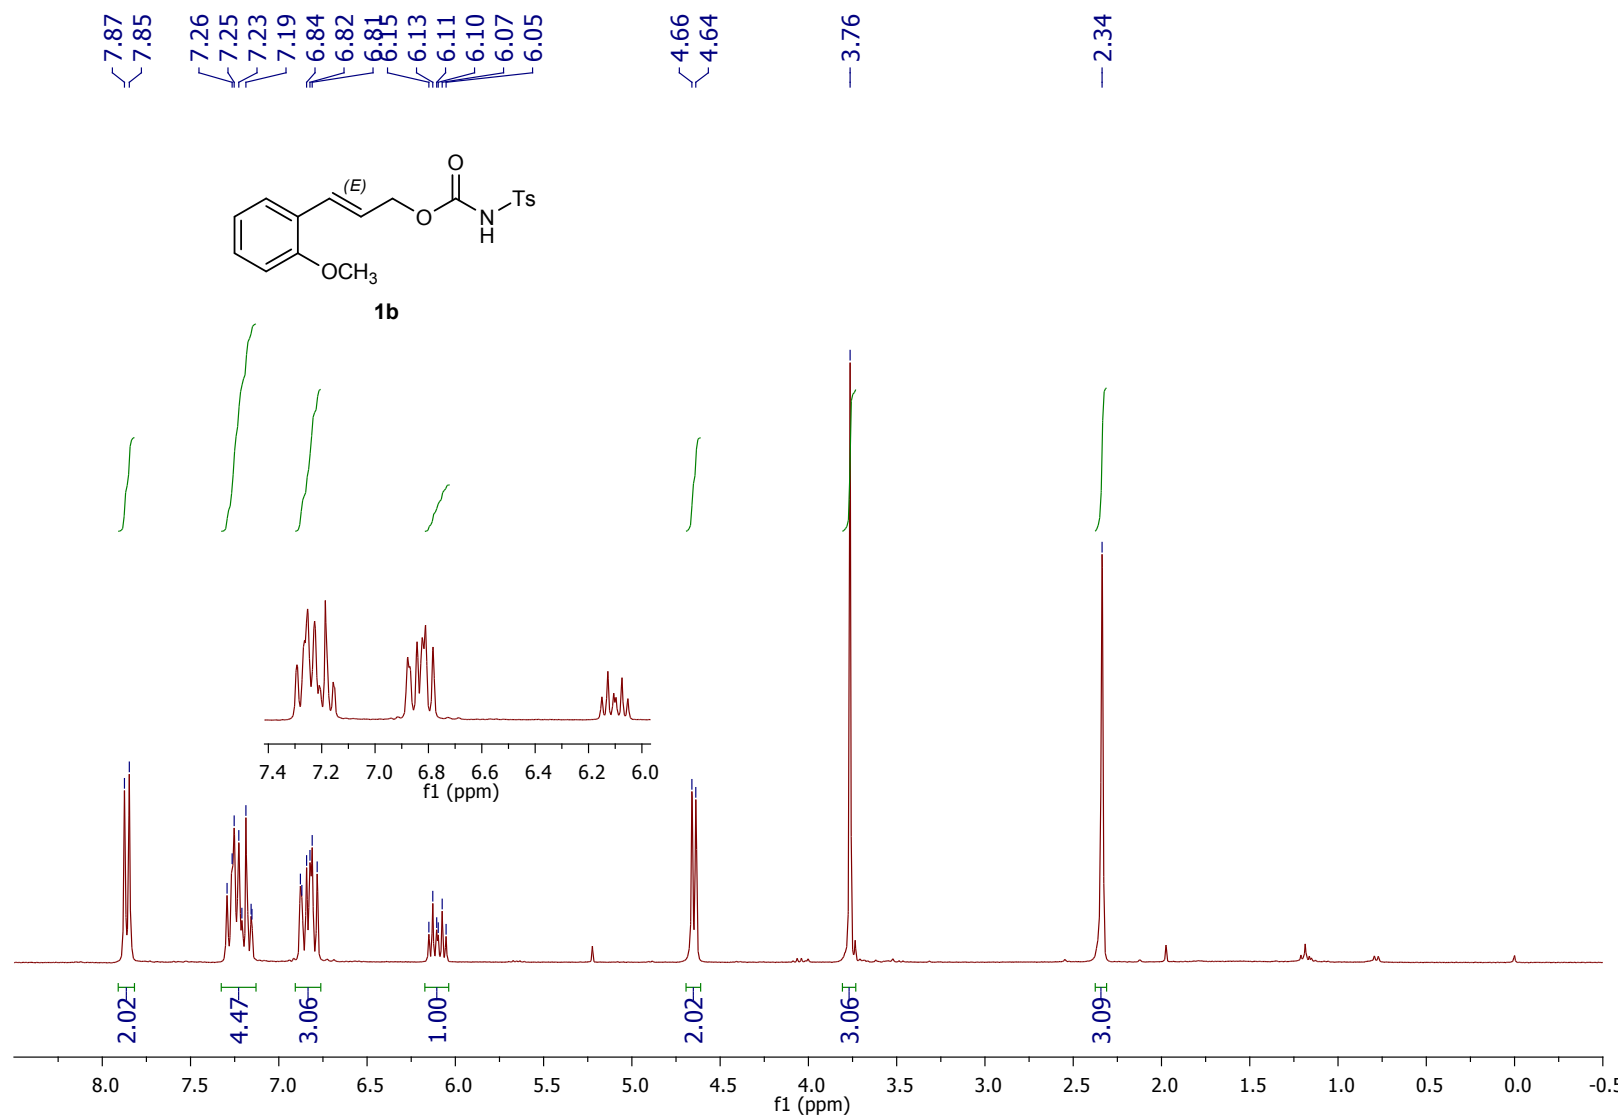

<sup>13</sup>C NMR (75 MHz, CDCl<sub>3</sub>) of substrate **1b**

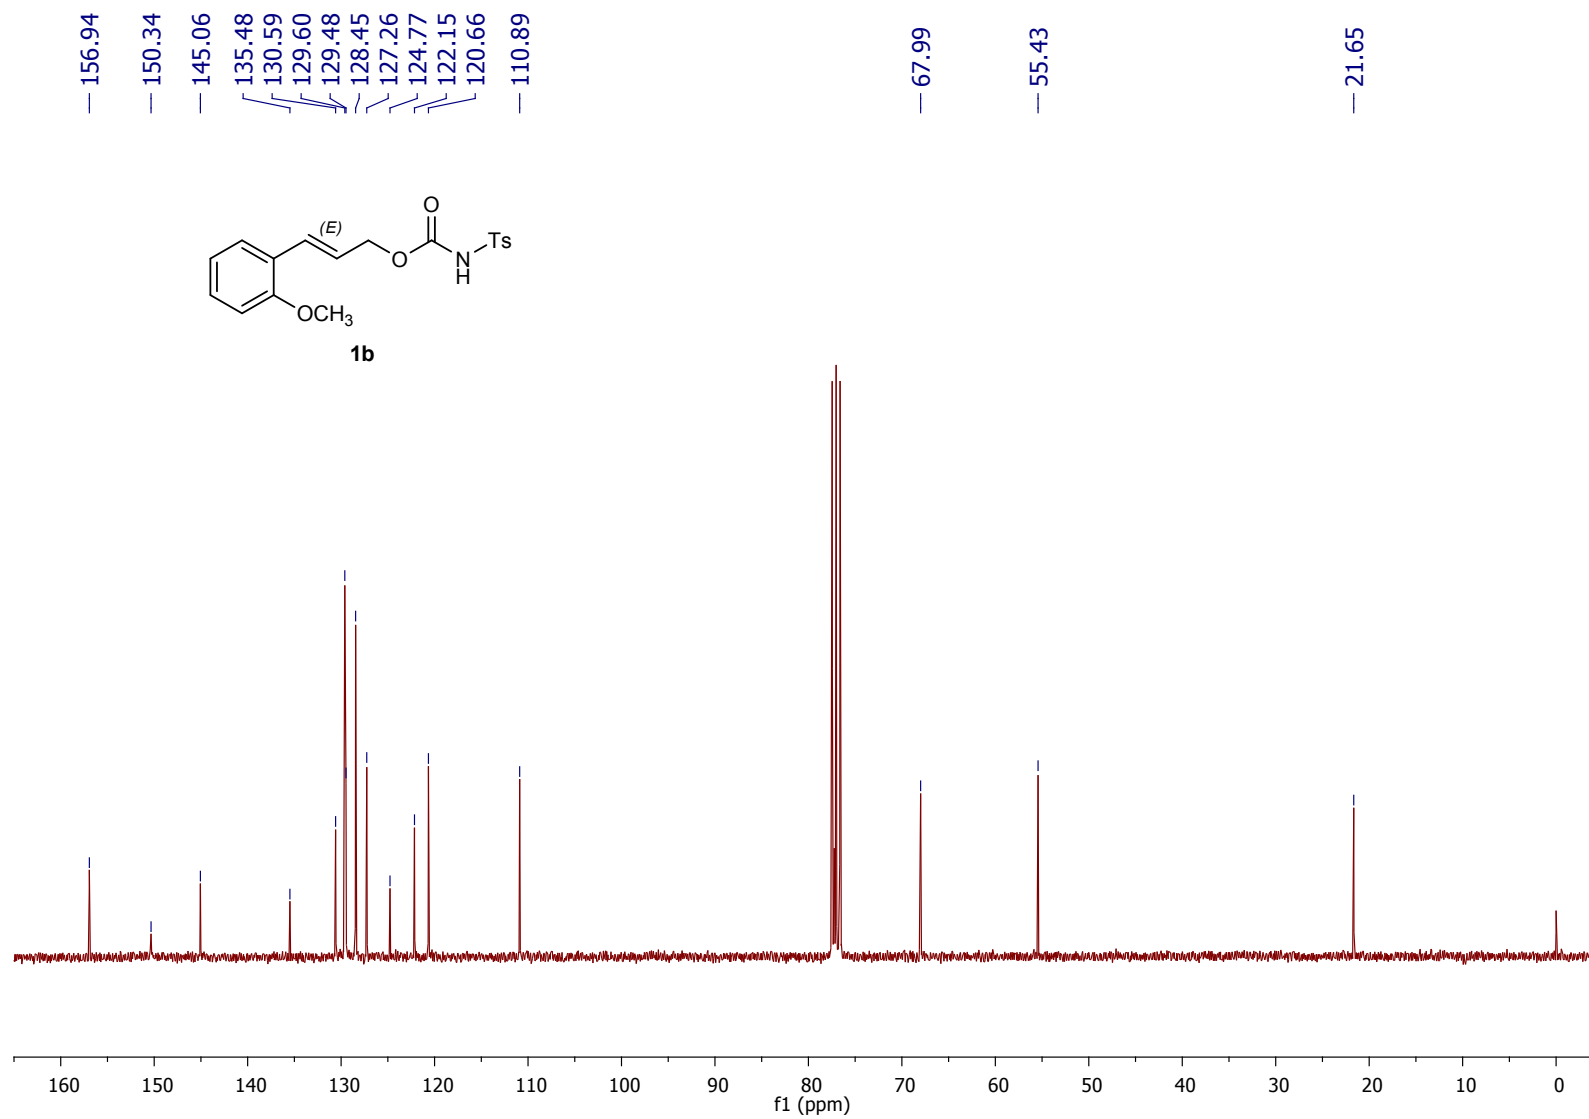

<sup>1</sup>H NMR (300 MHz, CDCl<sub>3</sub>) of substrate **1c**

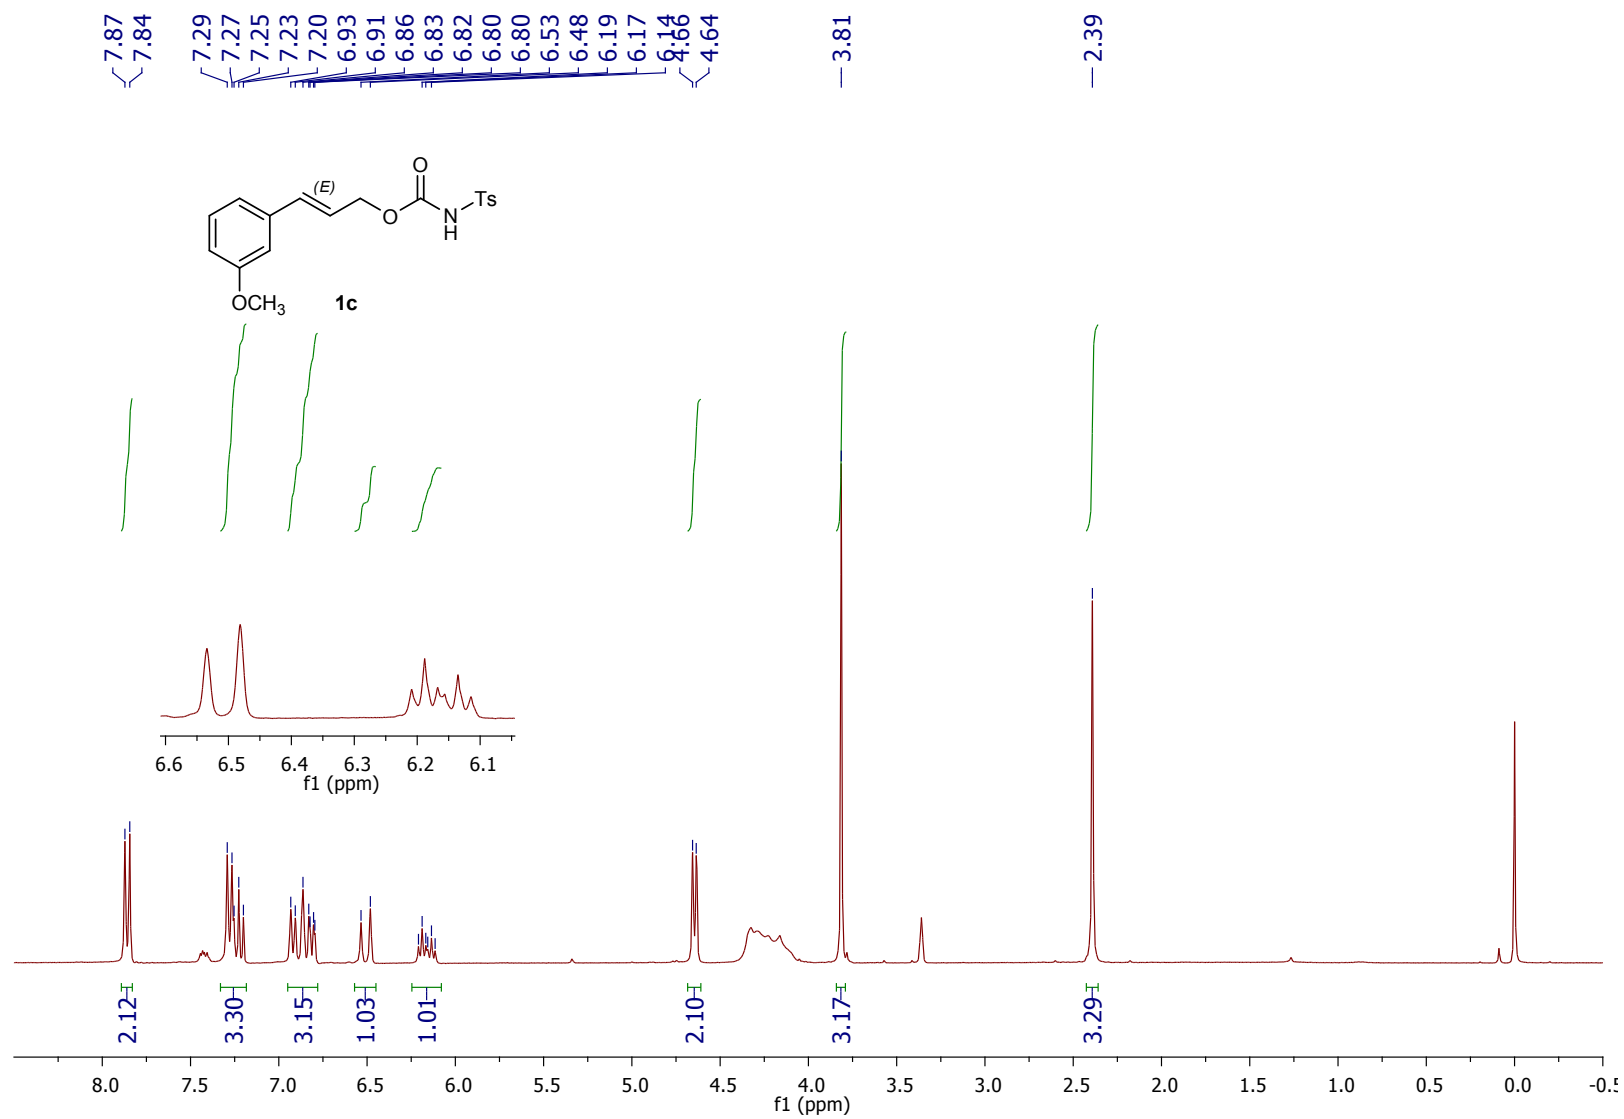

<sup>13</sup>C NMR (75 MHz, CDCl<sub>3</sub>) of substrate **1c**

— 159.74  
— 152.81  
— 144.22  
— 137.39  
— 136.57  
— 134.44  
— 129.54  
— 129.47  
— 128.00  
— 122.66  
— 119.29  
— 113.78  
— 111.95

— 66.92  
— 55.21  
— 21.51

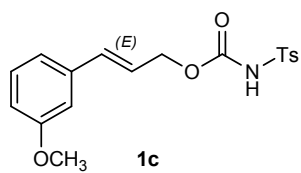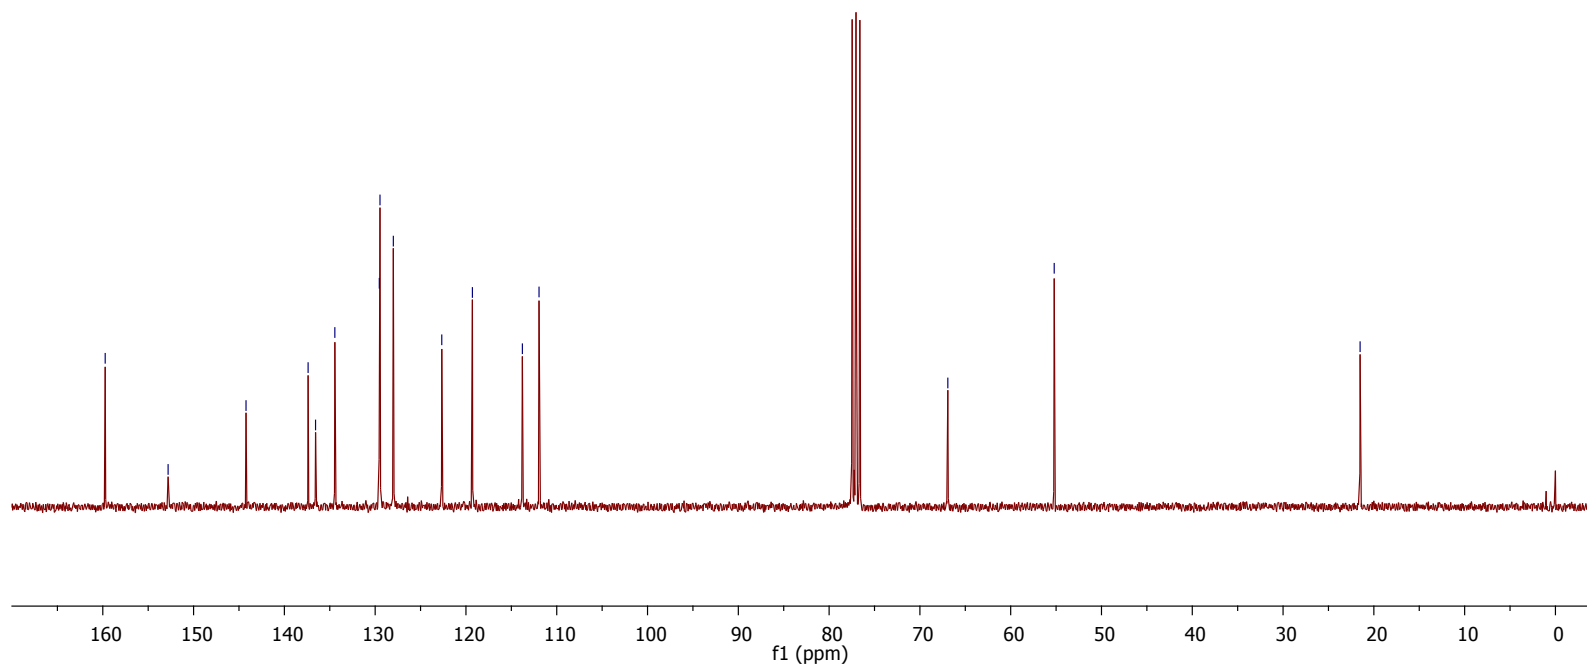



<sup>1</sup>H NMR (300 MHz, CD<sub>3</sub>OD) of substrate **1d**

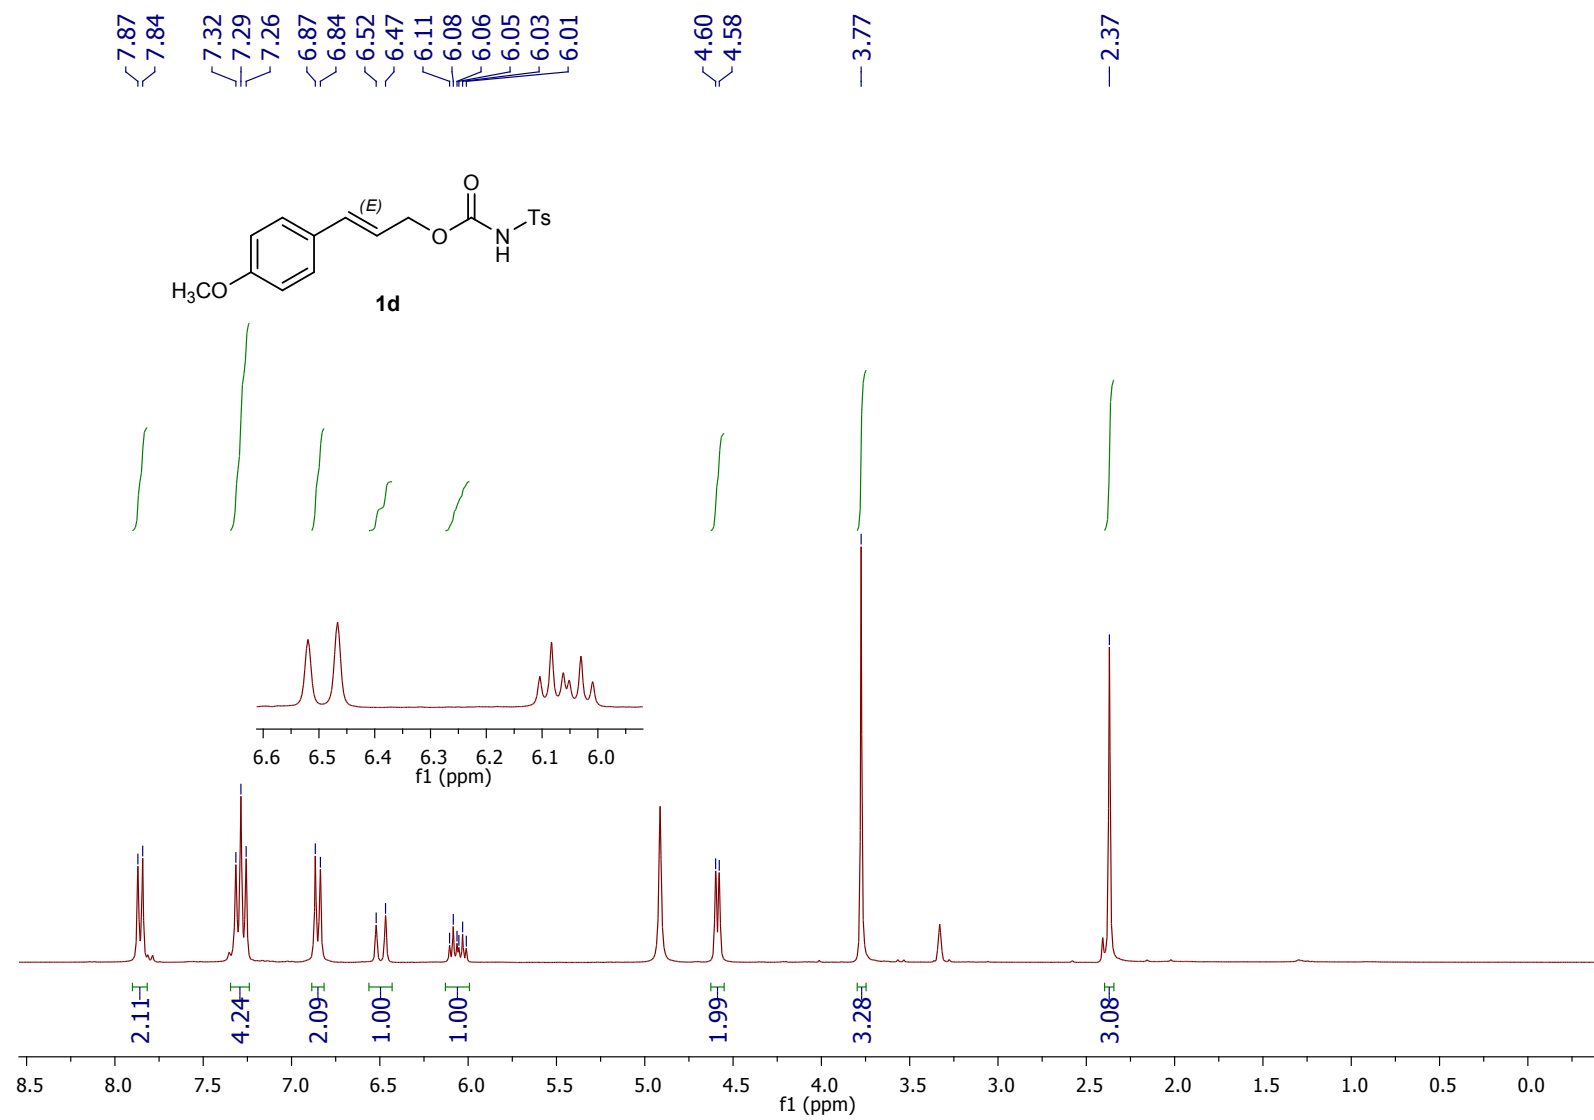

<sup>13</sup>C NMR (75 MHz, CD<sub>3</sub>OD) of substrate **1d**

— 161.01  
— 156.53  
— 144.55  
— 139.85  
— 134.53  
— 130.39  
— 130.19  
— 128.82  
— 128.62  
— 122.04  
— 114.95  
— 67.28  
— 55.69  
— 21.46

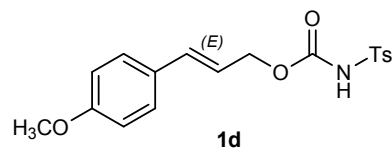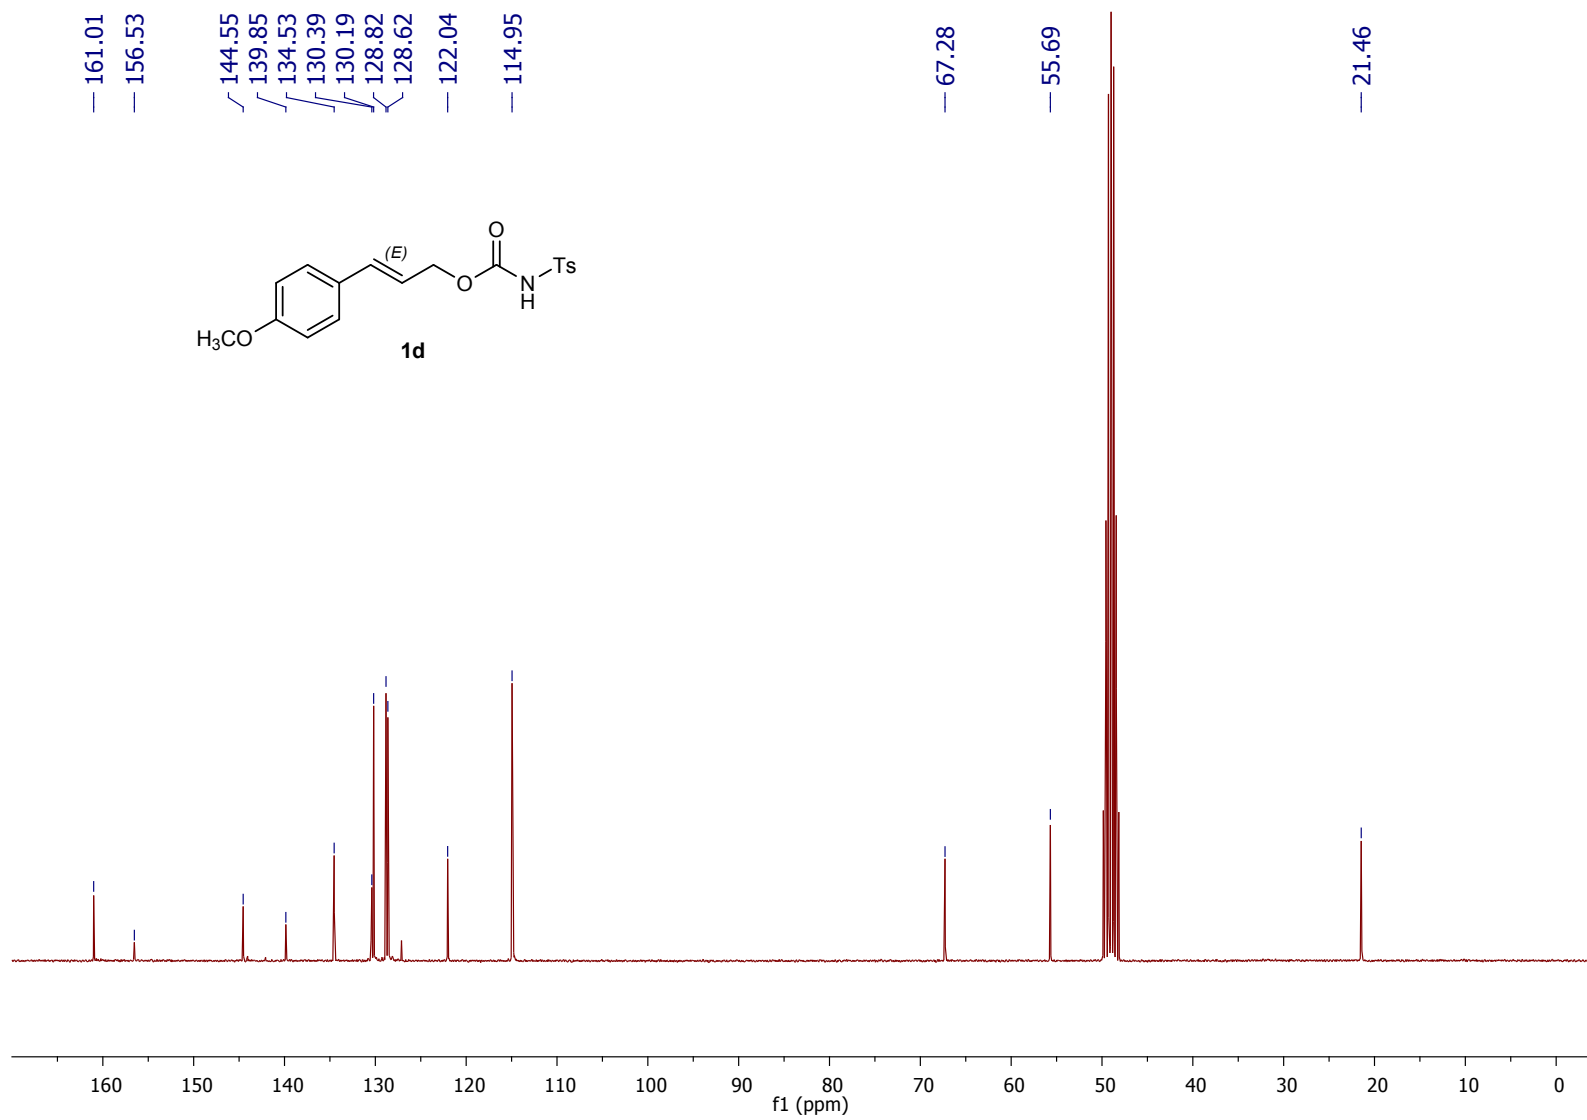

<sup>1</sup>H NMR (300 MHz, CDCl<sub>3</sub>) of substrate **1e**

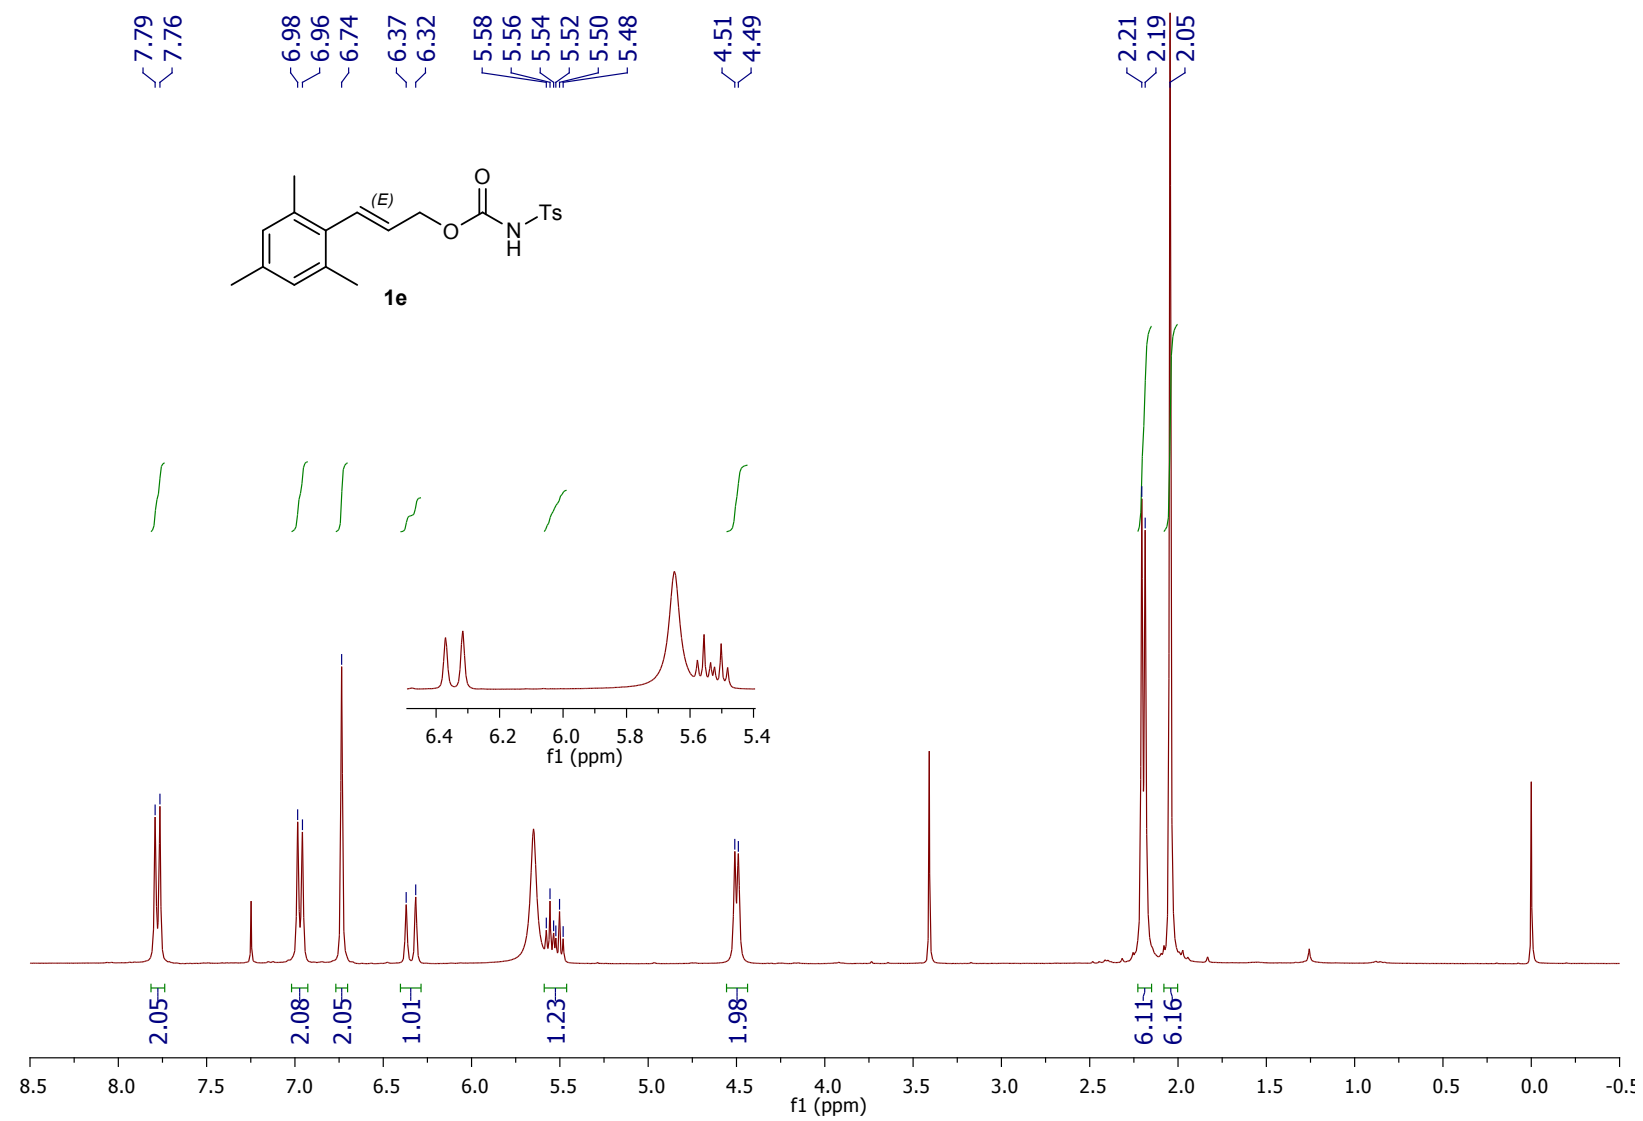

$^{13}\text{C}$  NMR (75 MHz,  $\text{CDCl}_3$ ) of substrate **1e**

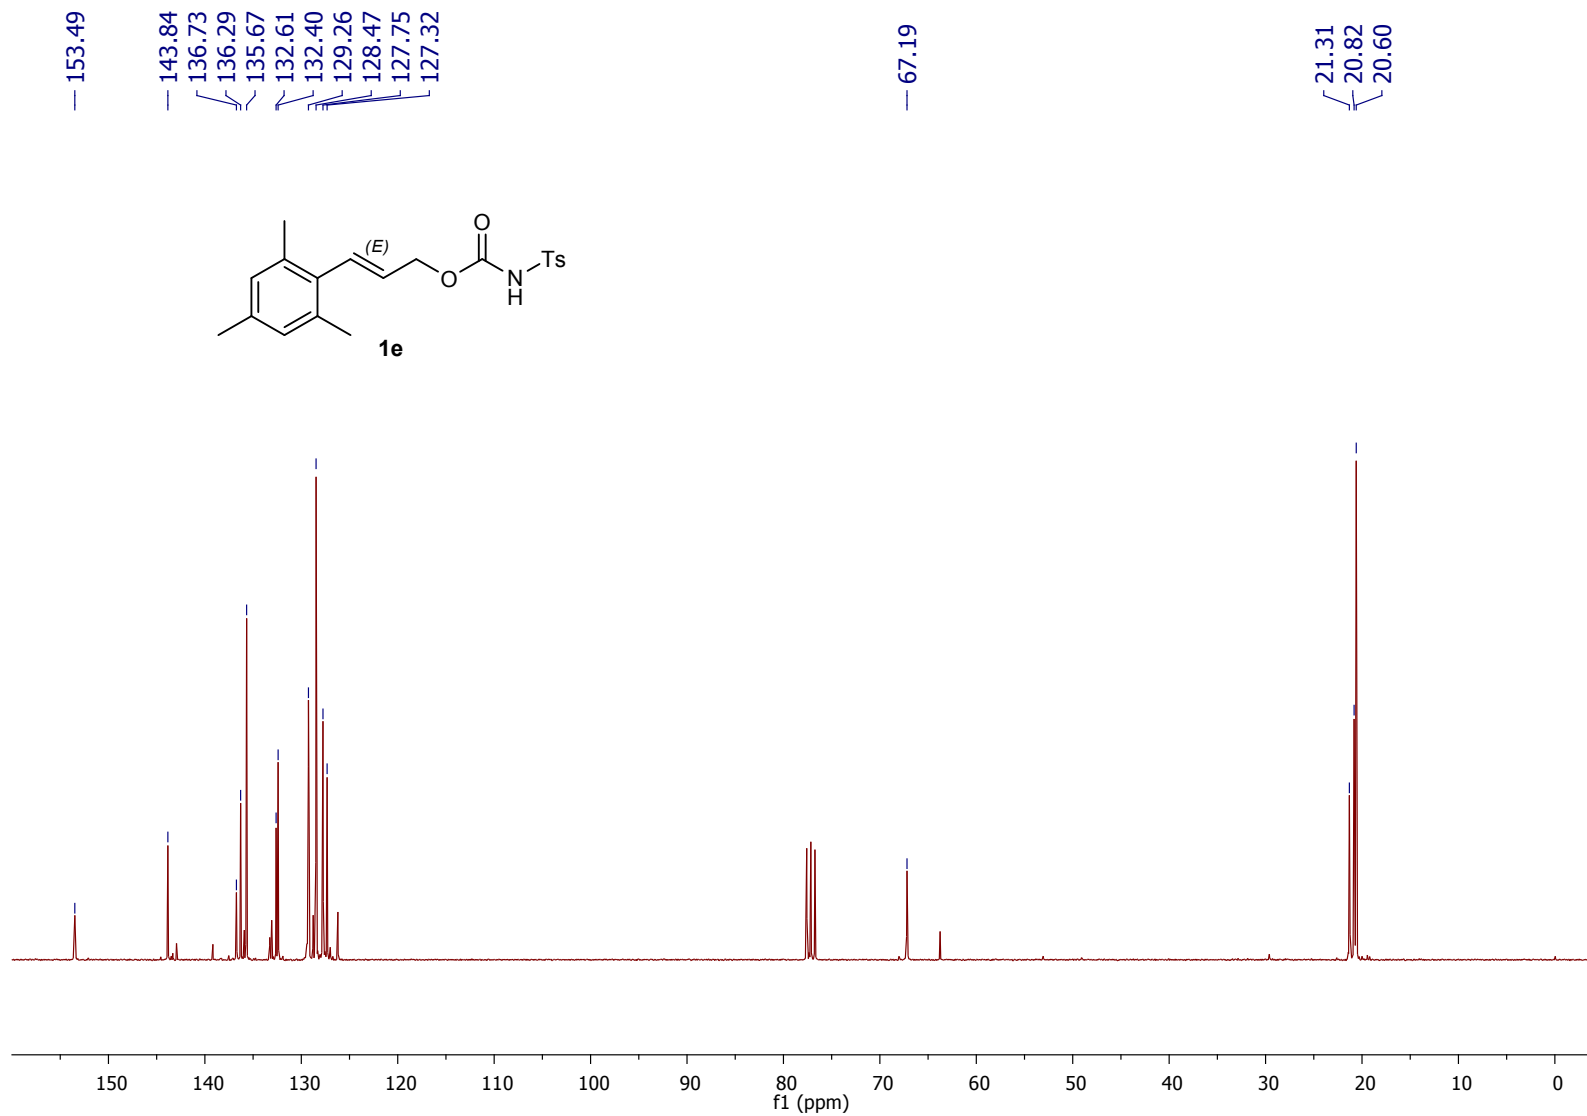

<sup>1</sup>H NMR (300 MHz, DMSO-*d*<sub>6</sub>) of substrate **1f**

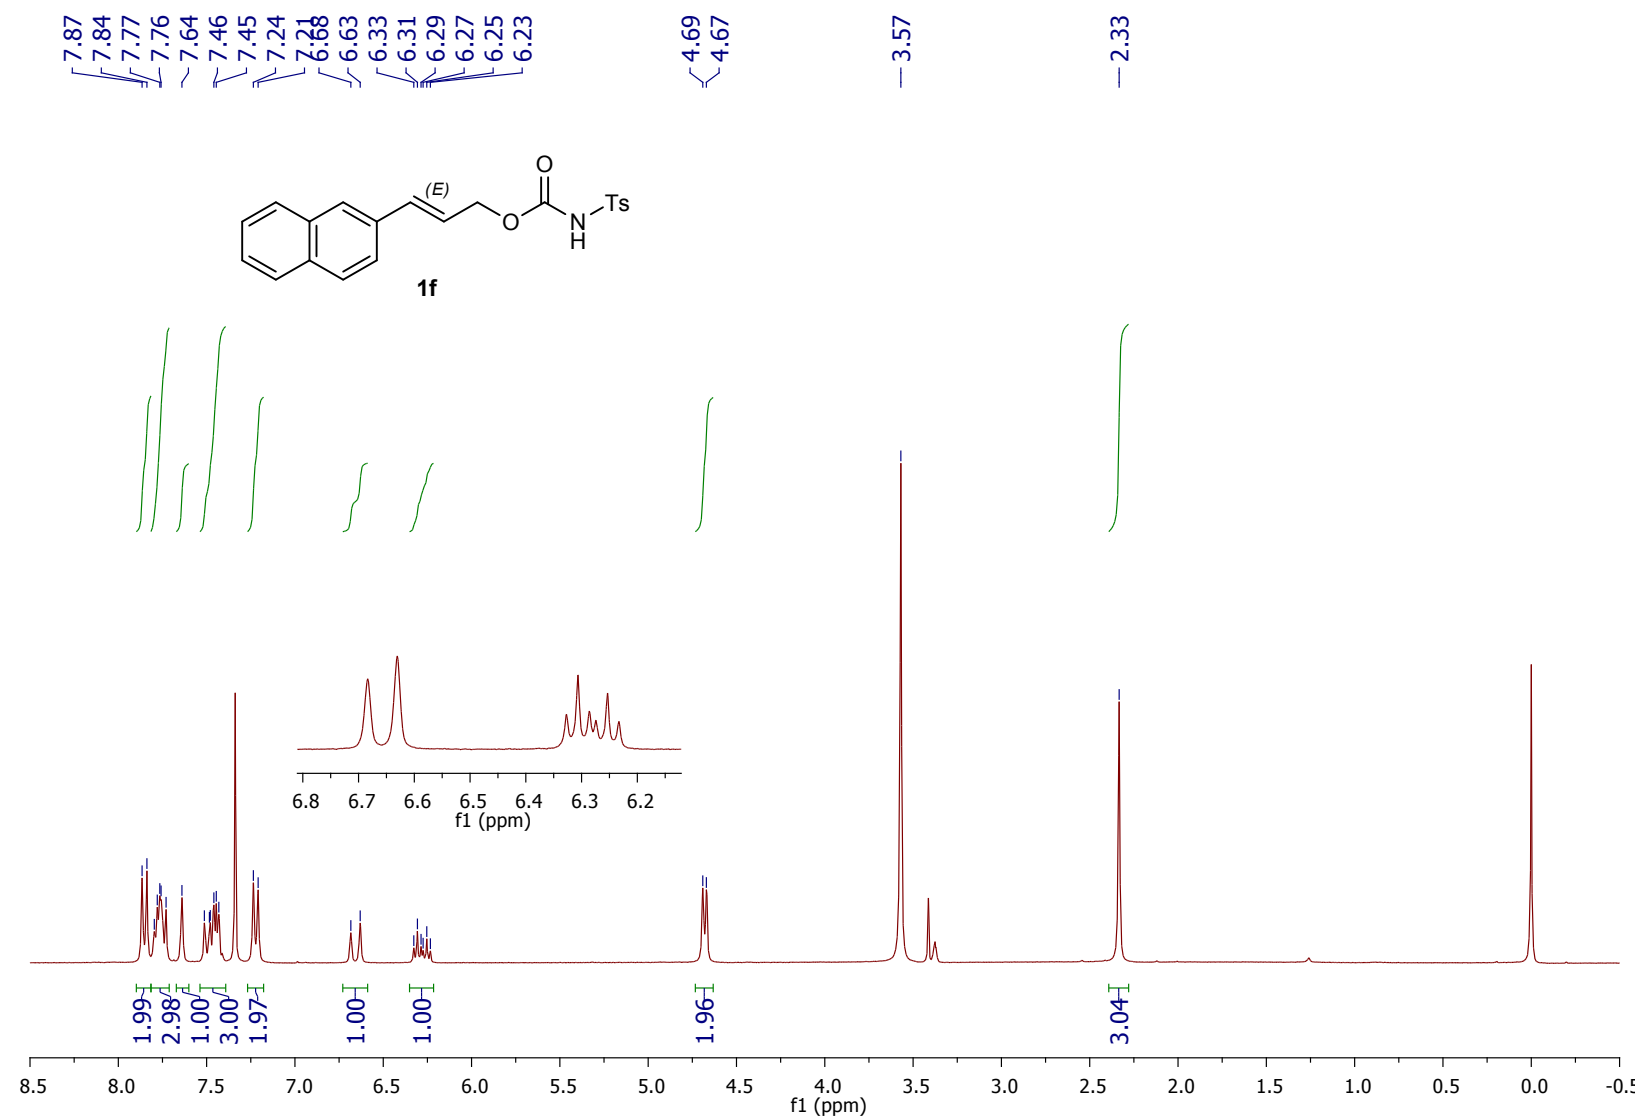

<sup>13</sup>C NMR (75 MHz, DMSO-*d*<sub>6</sub>) of substrate **1f**

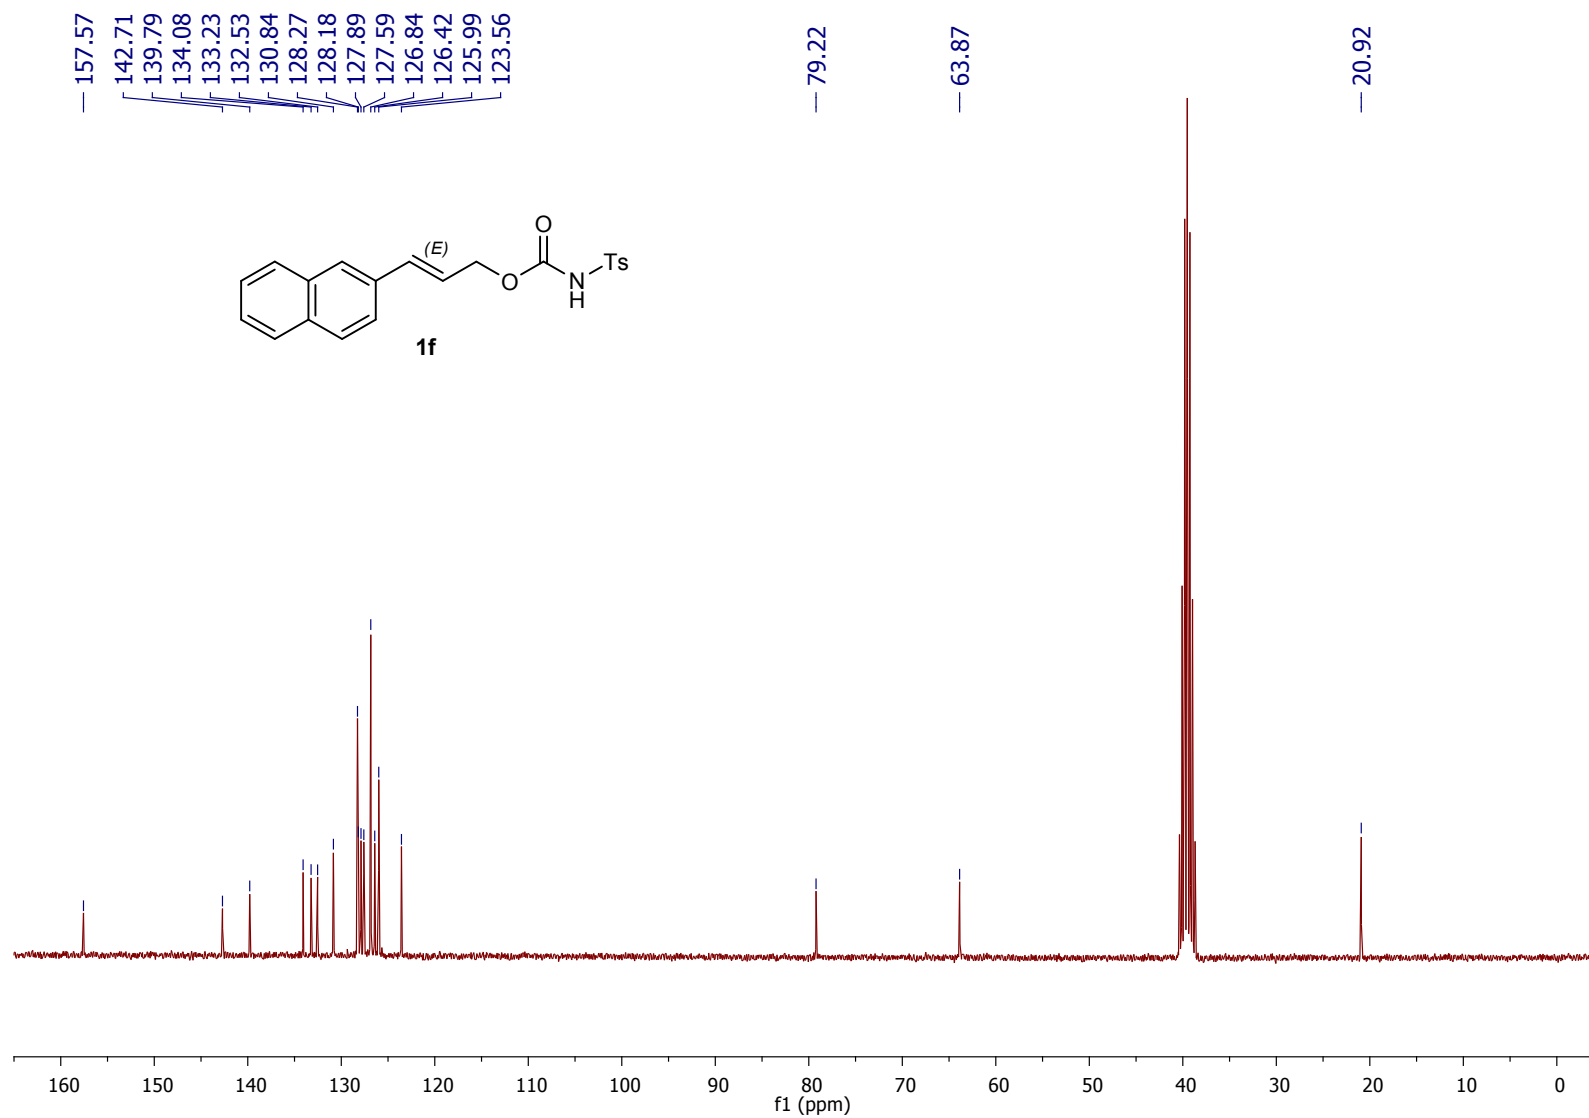

$^1\text{H}$  NMR (300 MHz,  $\text{CD}_3\text{OD}$ ) of substrate **1g**

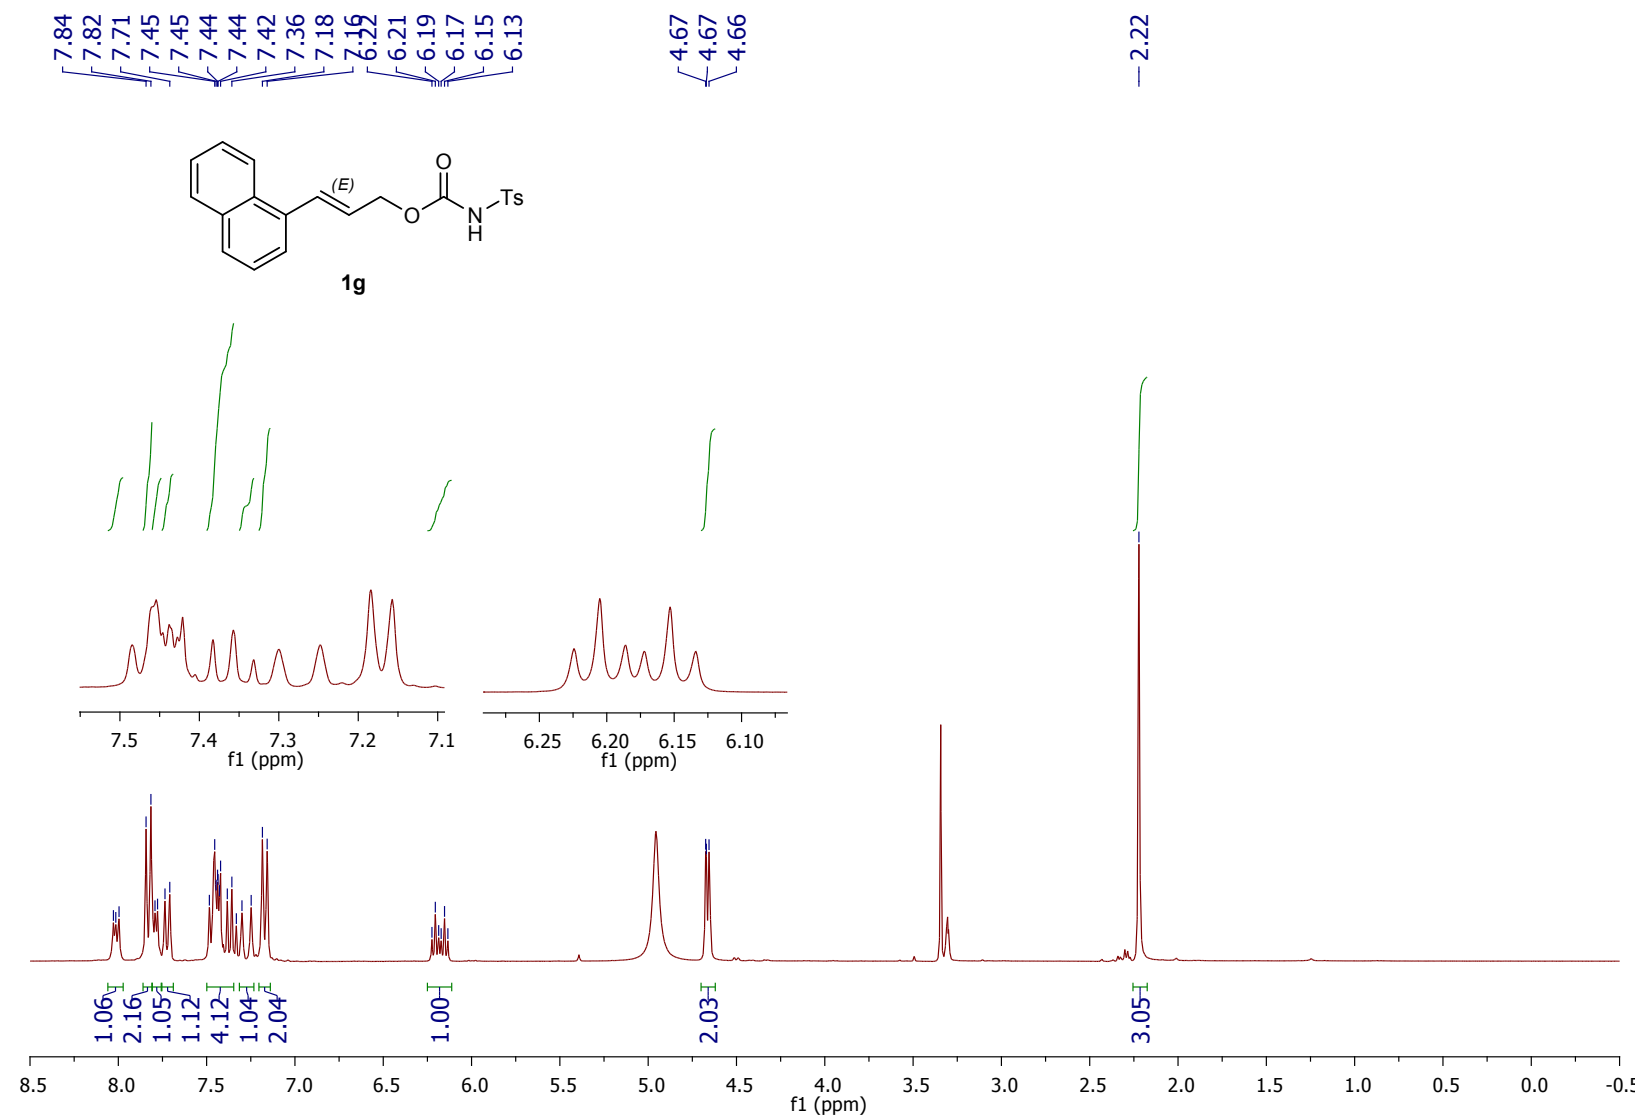

<sup>13</sup>C NMR (75 MHz, CDCl<sub>3</sub>) of substrate **1g**

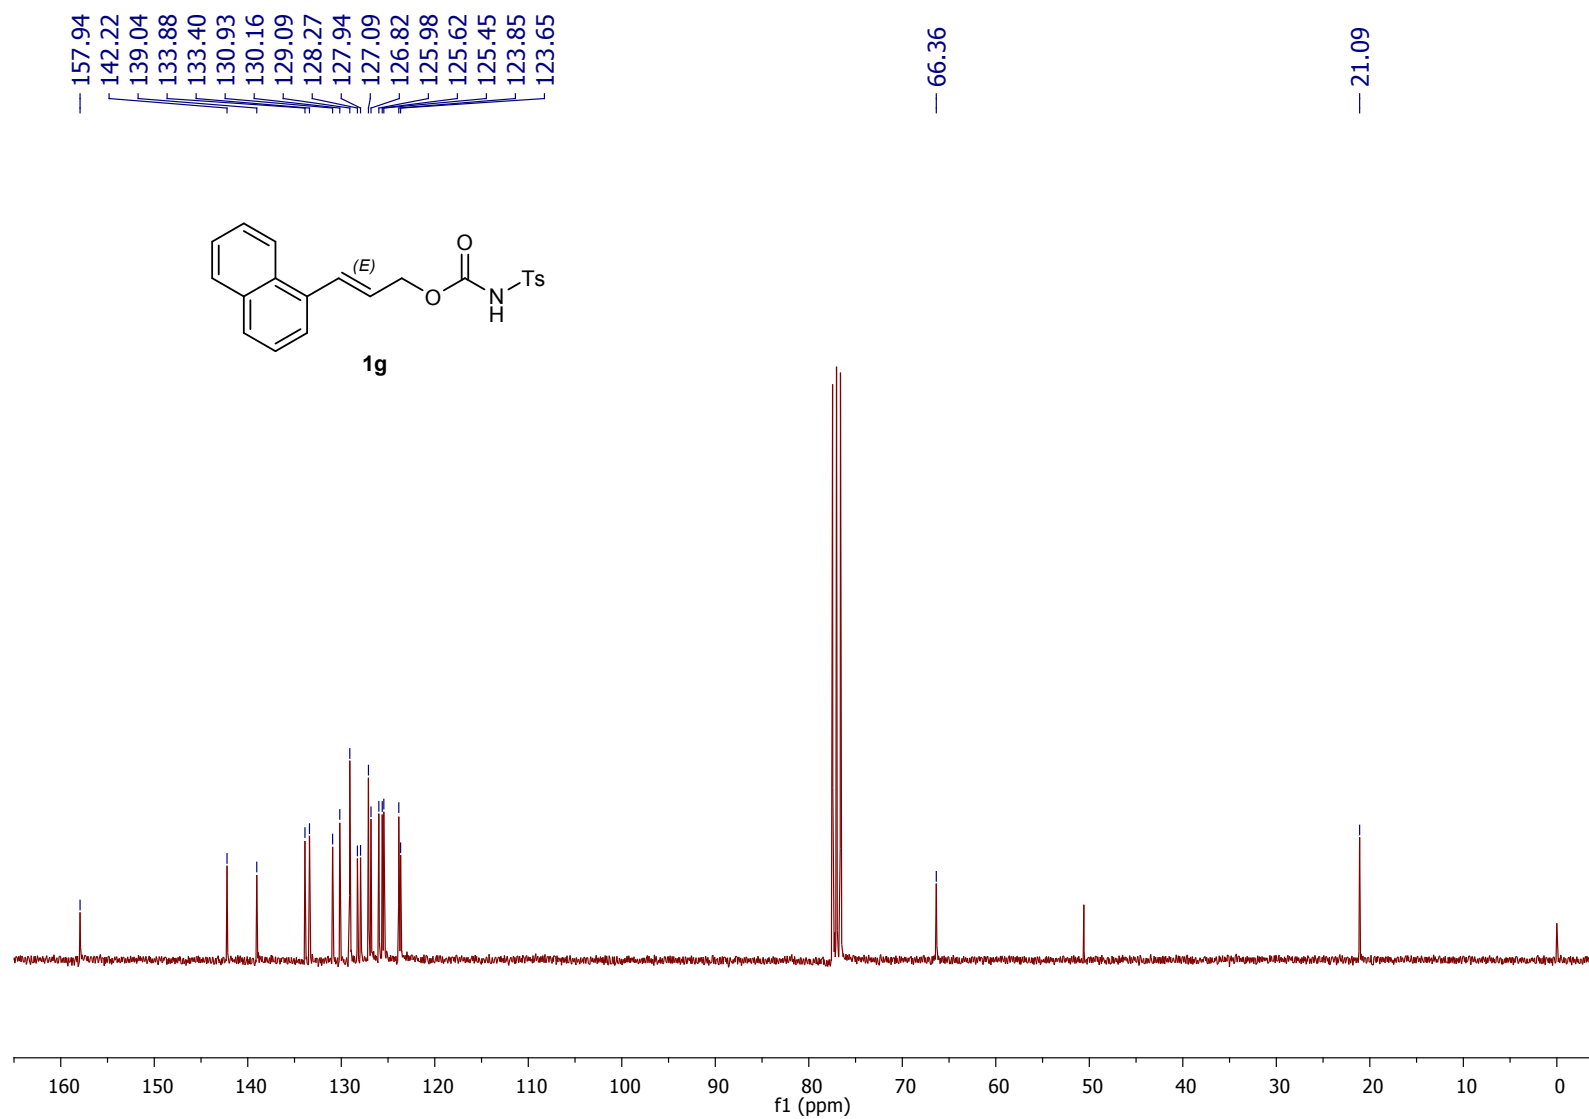



<sup>1</sup>H NMR (300 MHz, CDCl<sub>3</sub>) of substrate **1h**

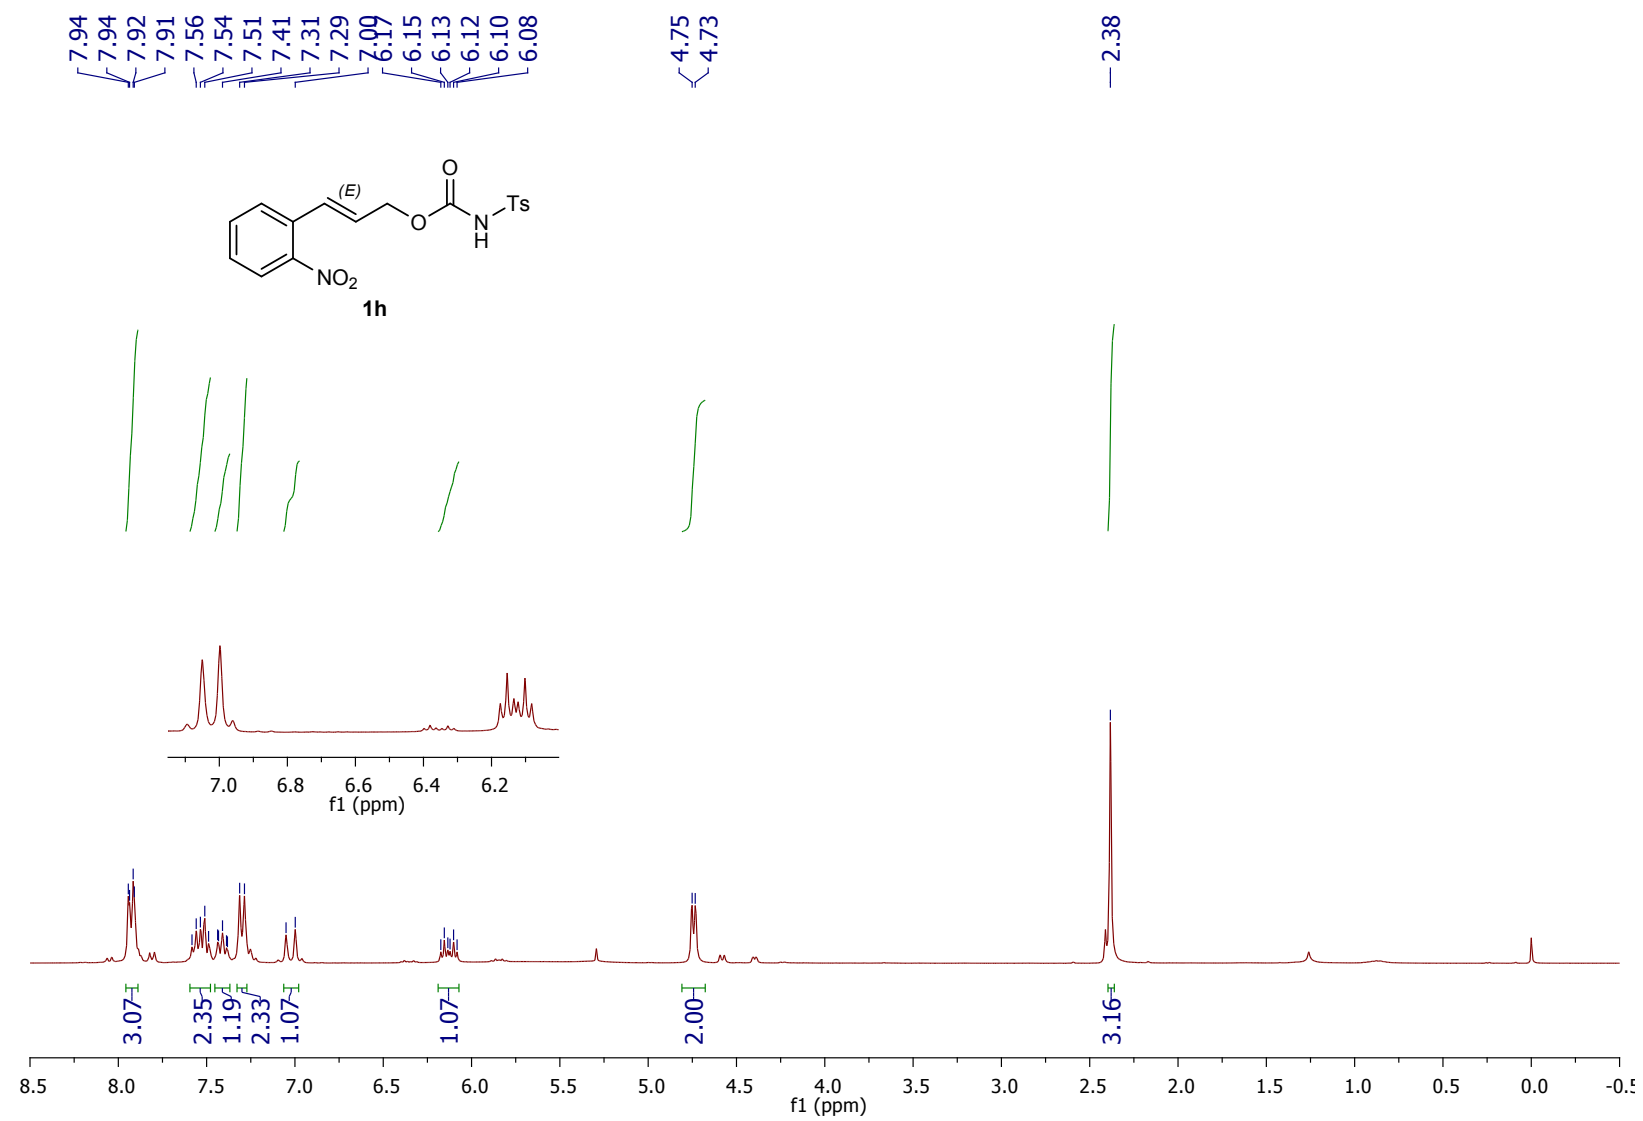

$^{13}\text{C}$  NMR (75 MHz,  $\text{CDCl}_3$ ) of substrate **1h**

150.65  
147.66  
145.08  
135.48  
133.35  
131.73  
129.63  
129.56  
128.90  
128.76  
128.32  
127.28  
124.58

66.42

21.61

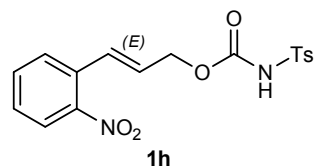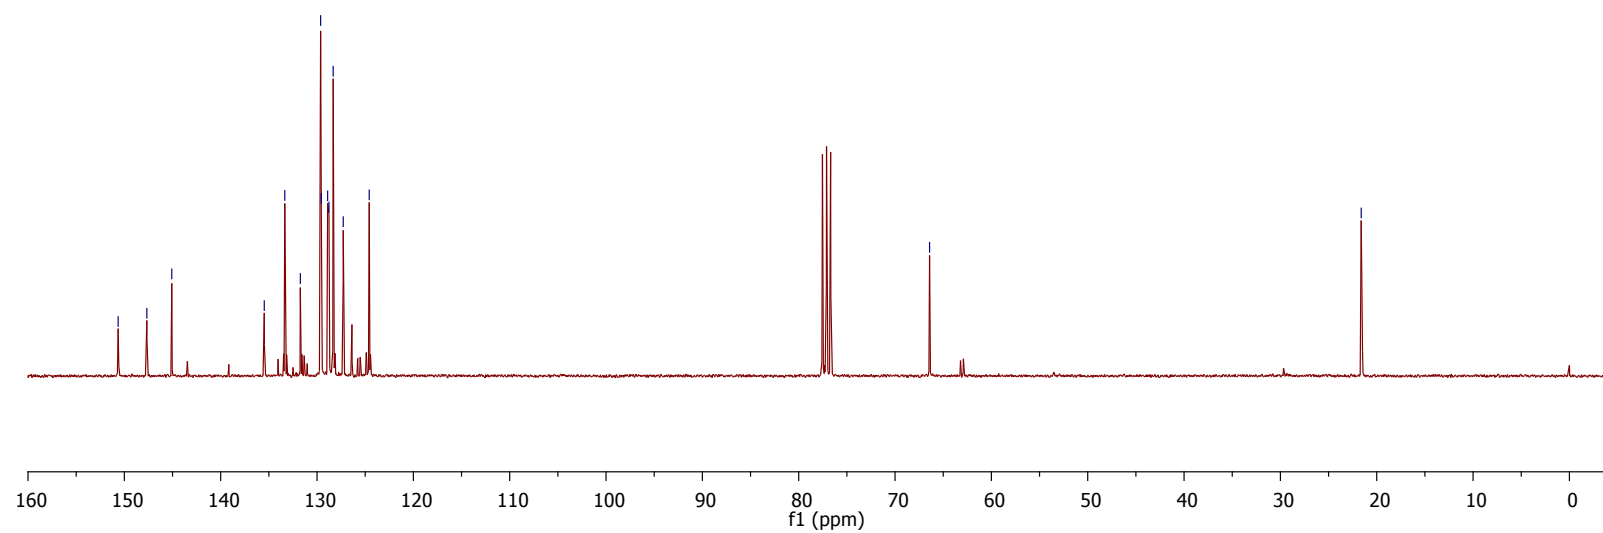

<sup>1</sup>H NMR (300 MHz, CD<sub>3</sub>OD) of substrate **1i**

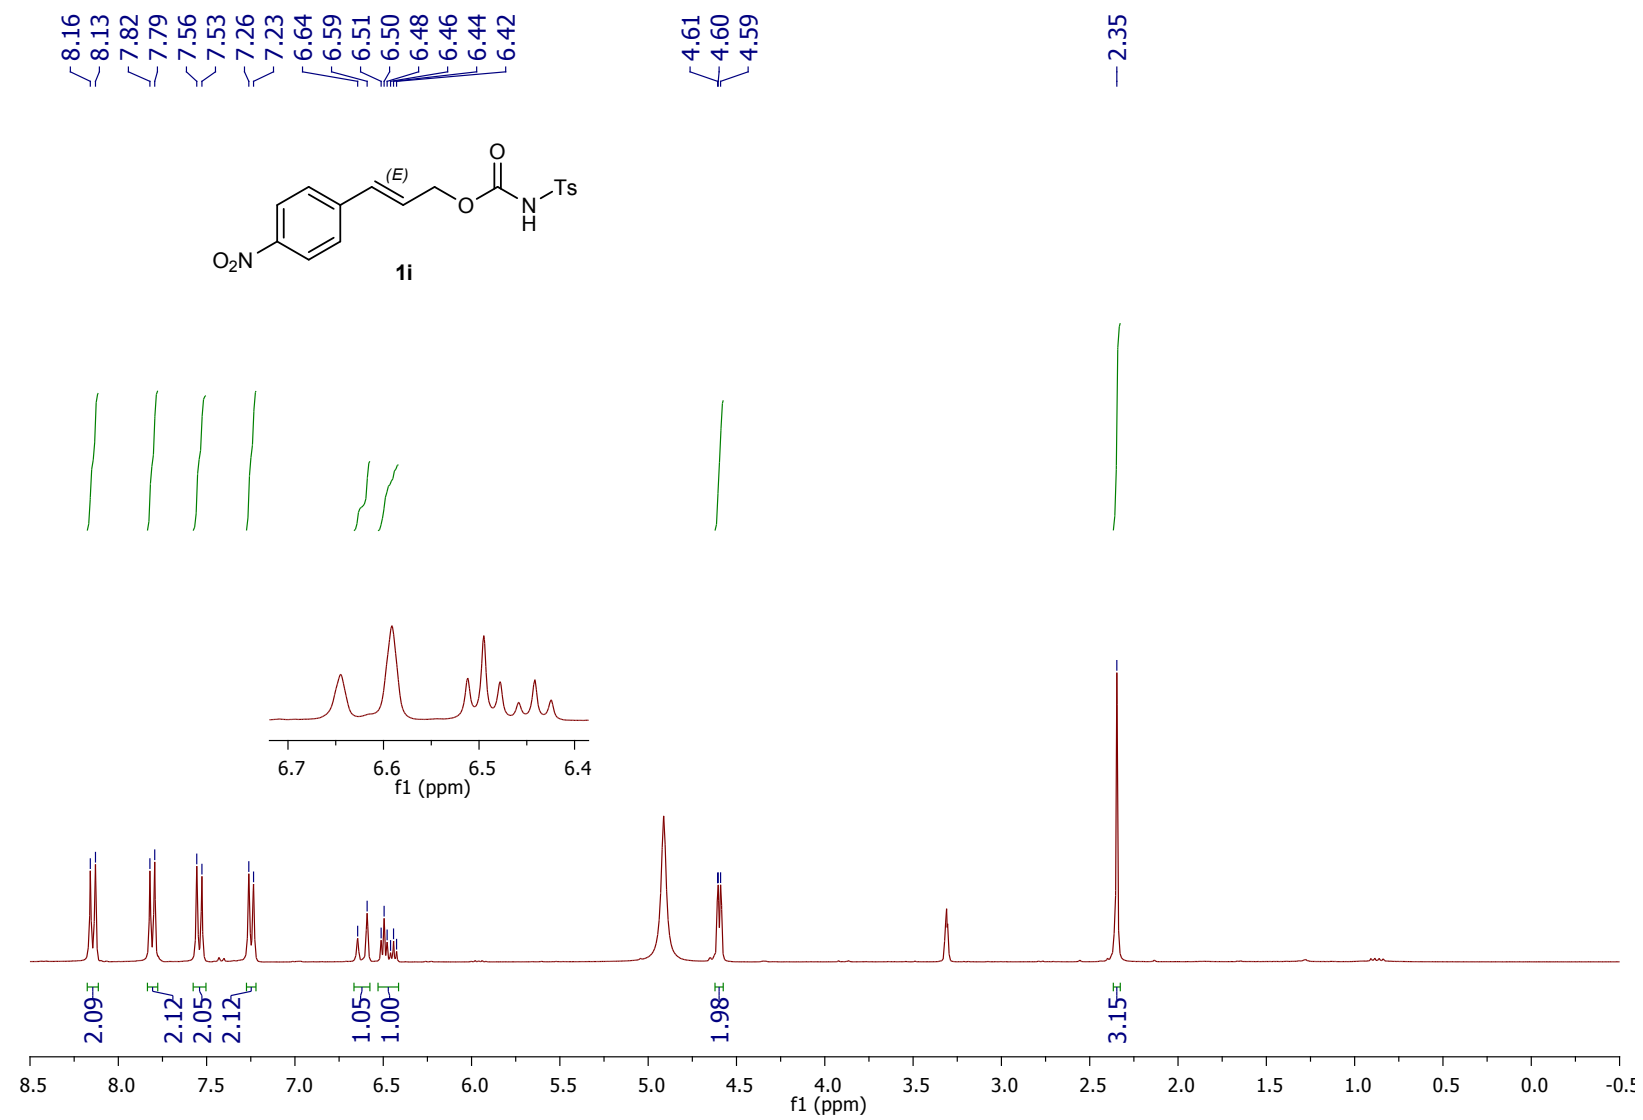

<sup>13</sup>C NMR (75 MHz, DMSO-*d*<sub>6</sub>) of substrate **1i**

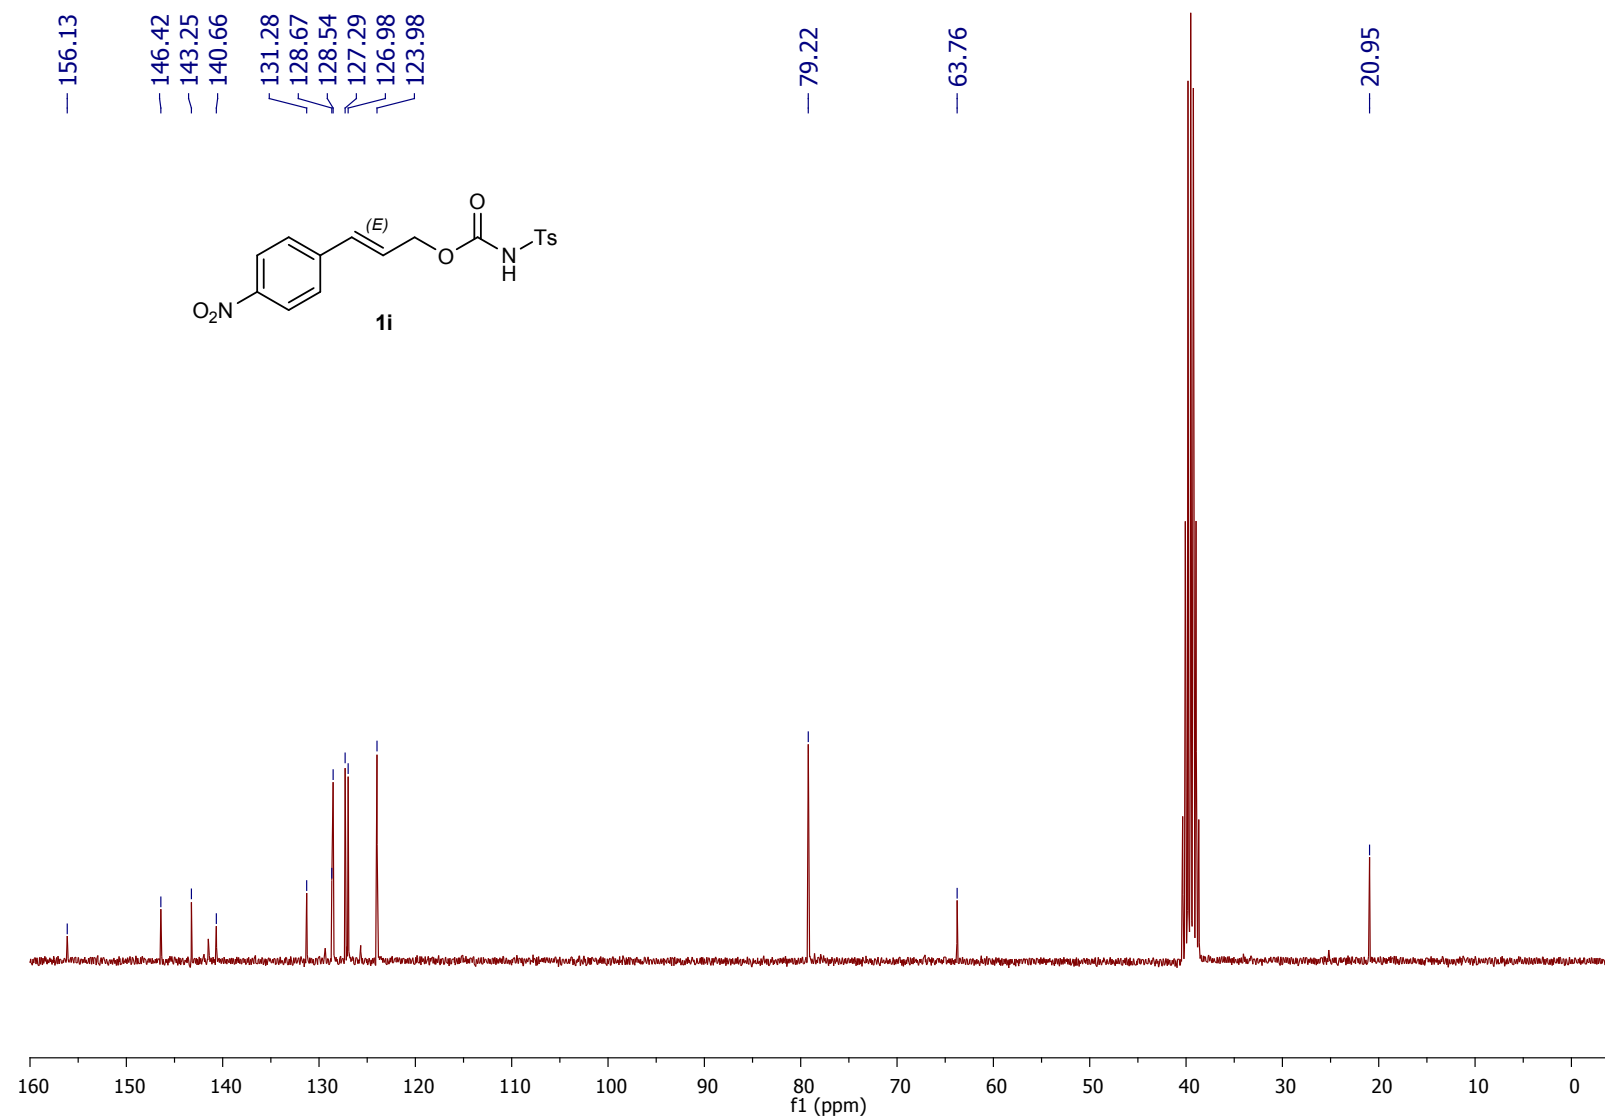

<sup>1</sup>H NMR (300 MHz, DMSO-*d*<sub>6</sub>) of substrate **1j**

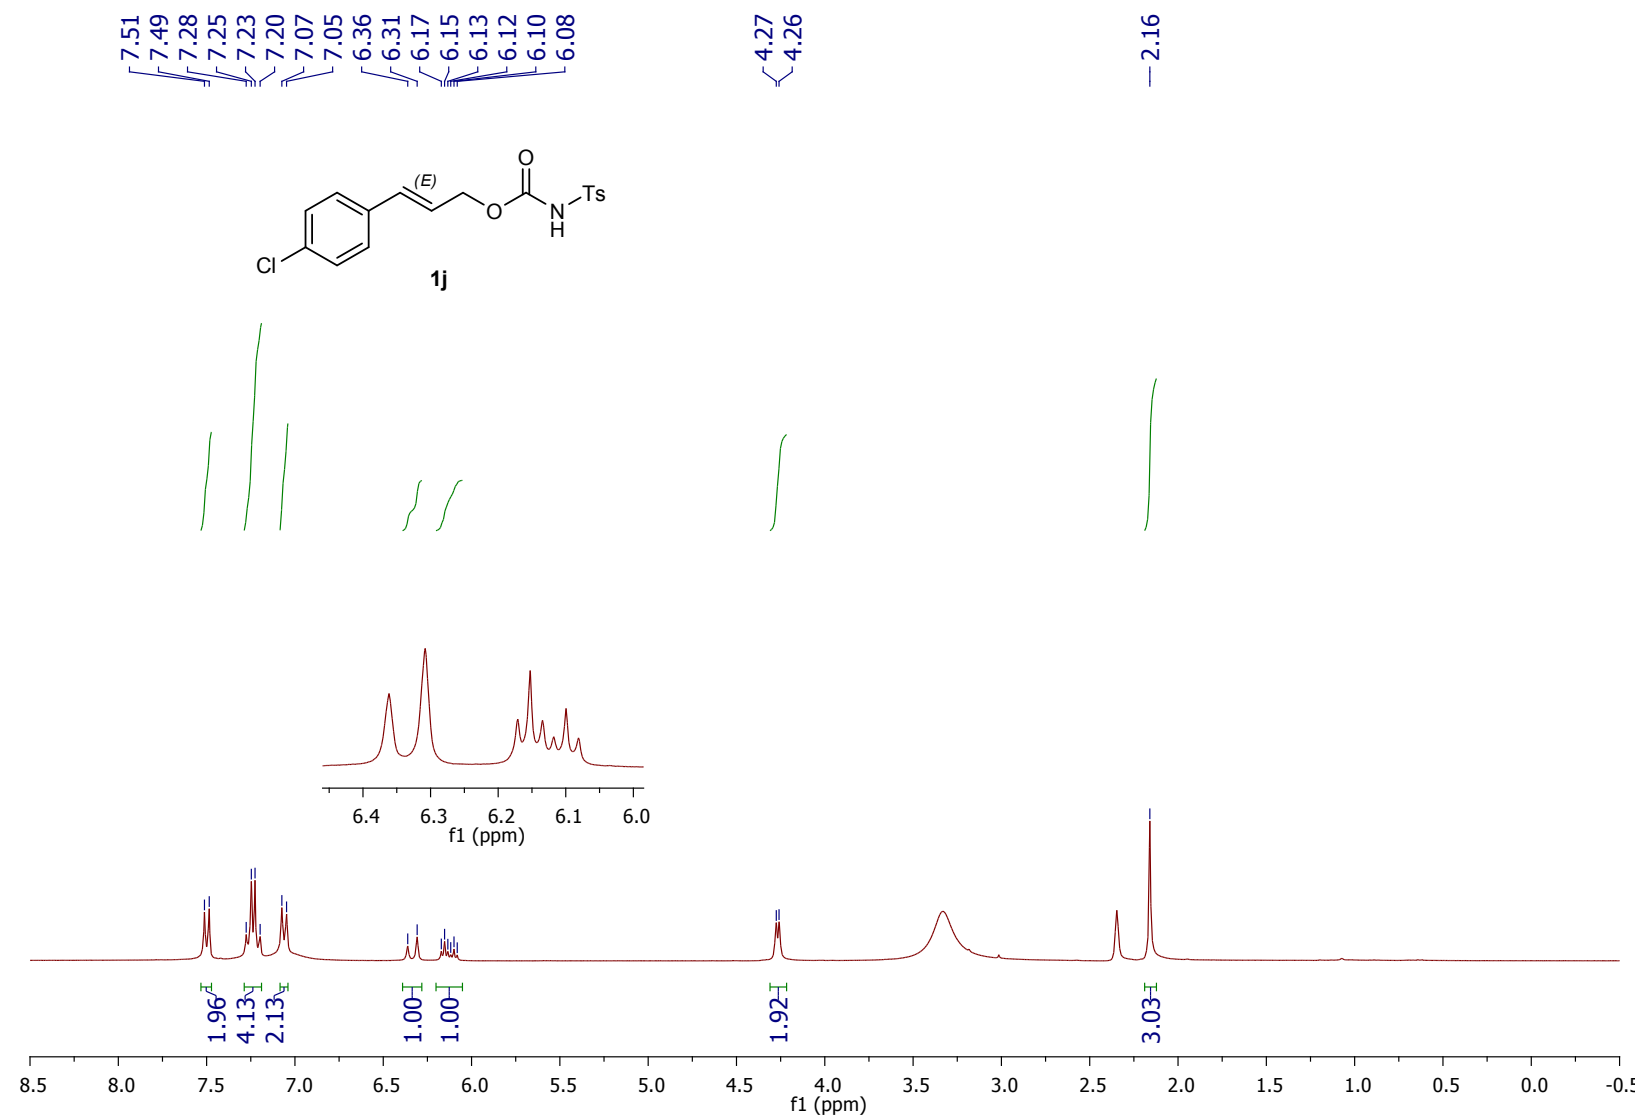

<sup>13</sup>C NMR (75 MHz, DMSO-d<sub>6</sub>) of substrate **1j**

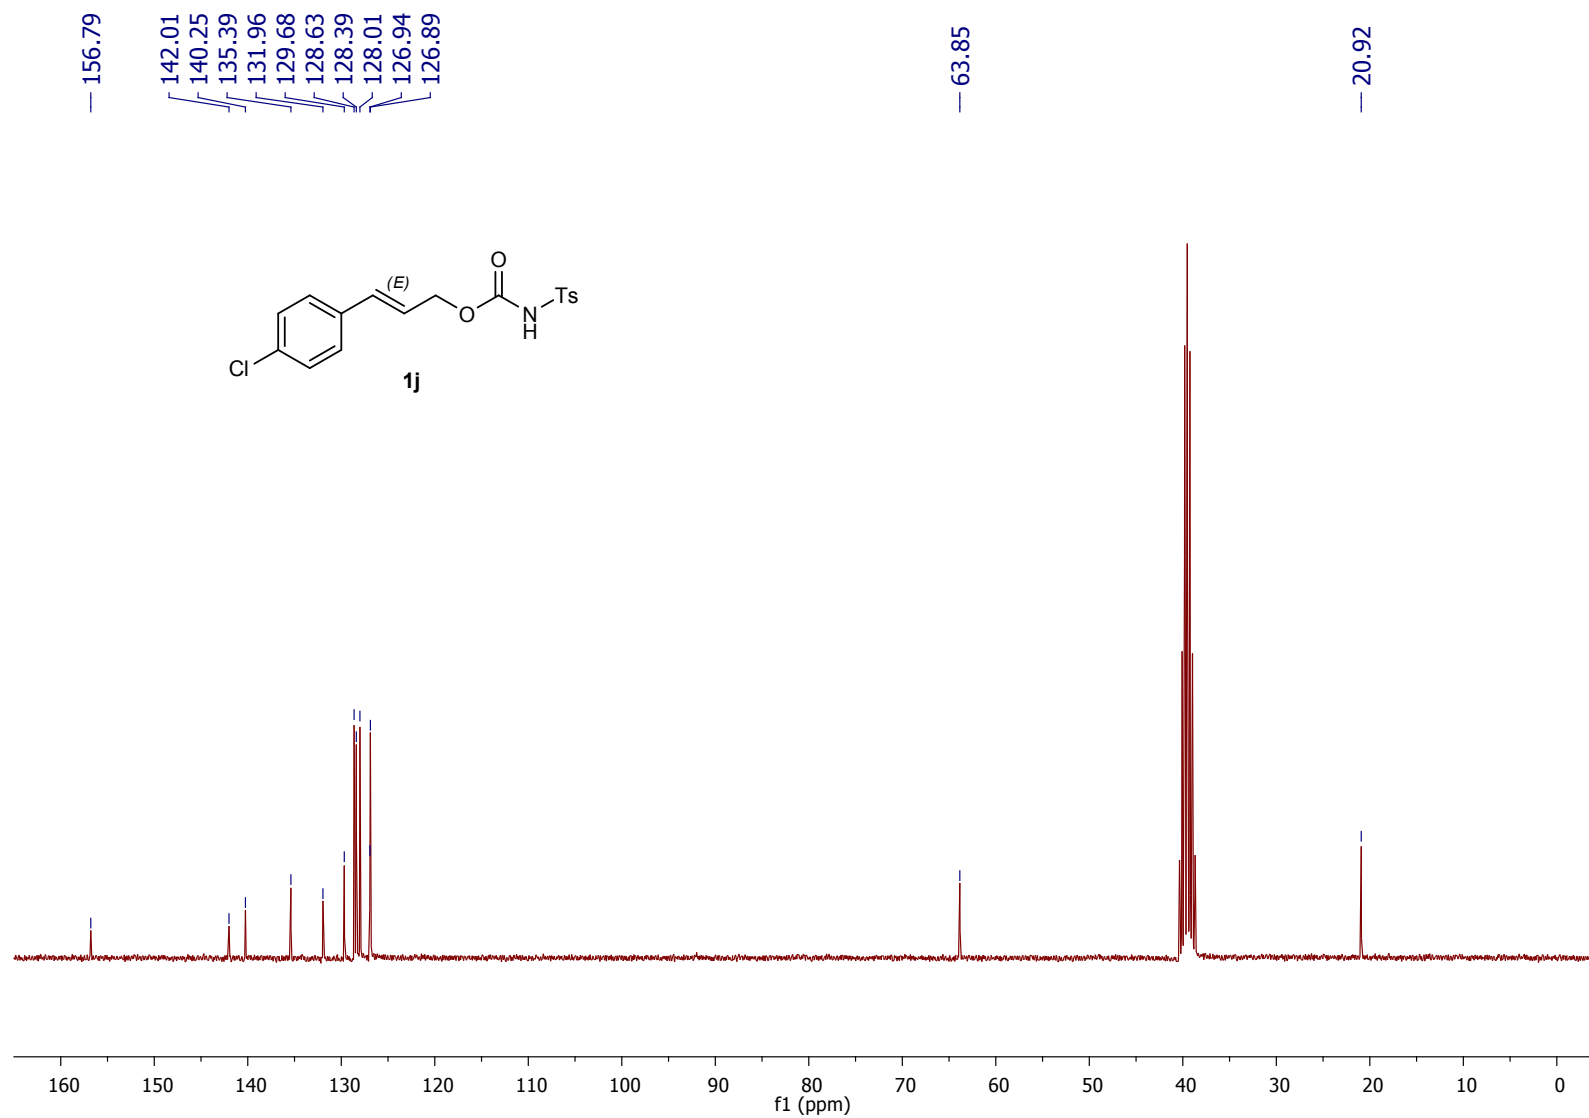

<sup>1</sup>H NMR (300 MHz, CDCl<sub>3</sub>) of substrate **1k**

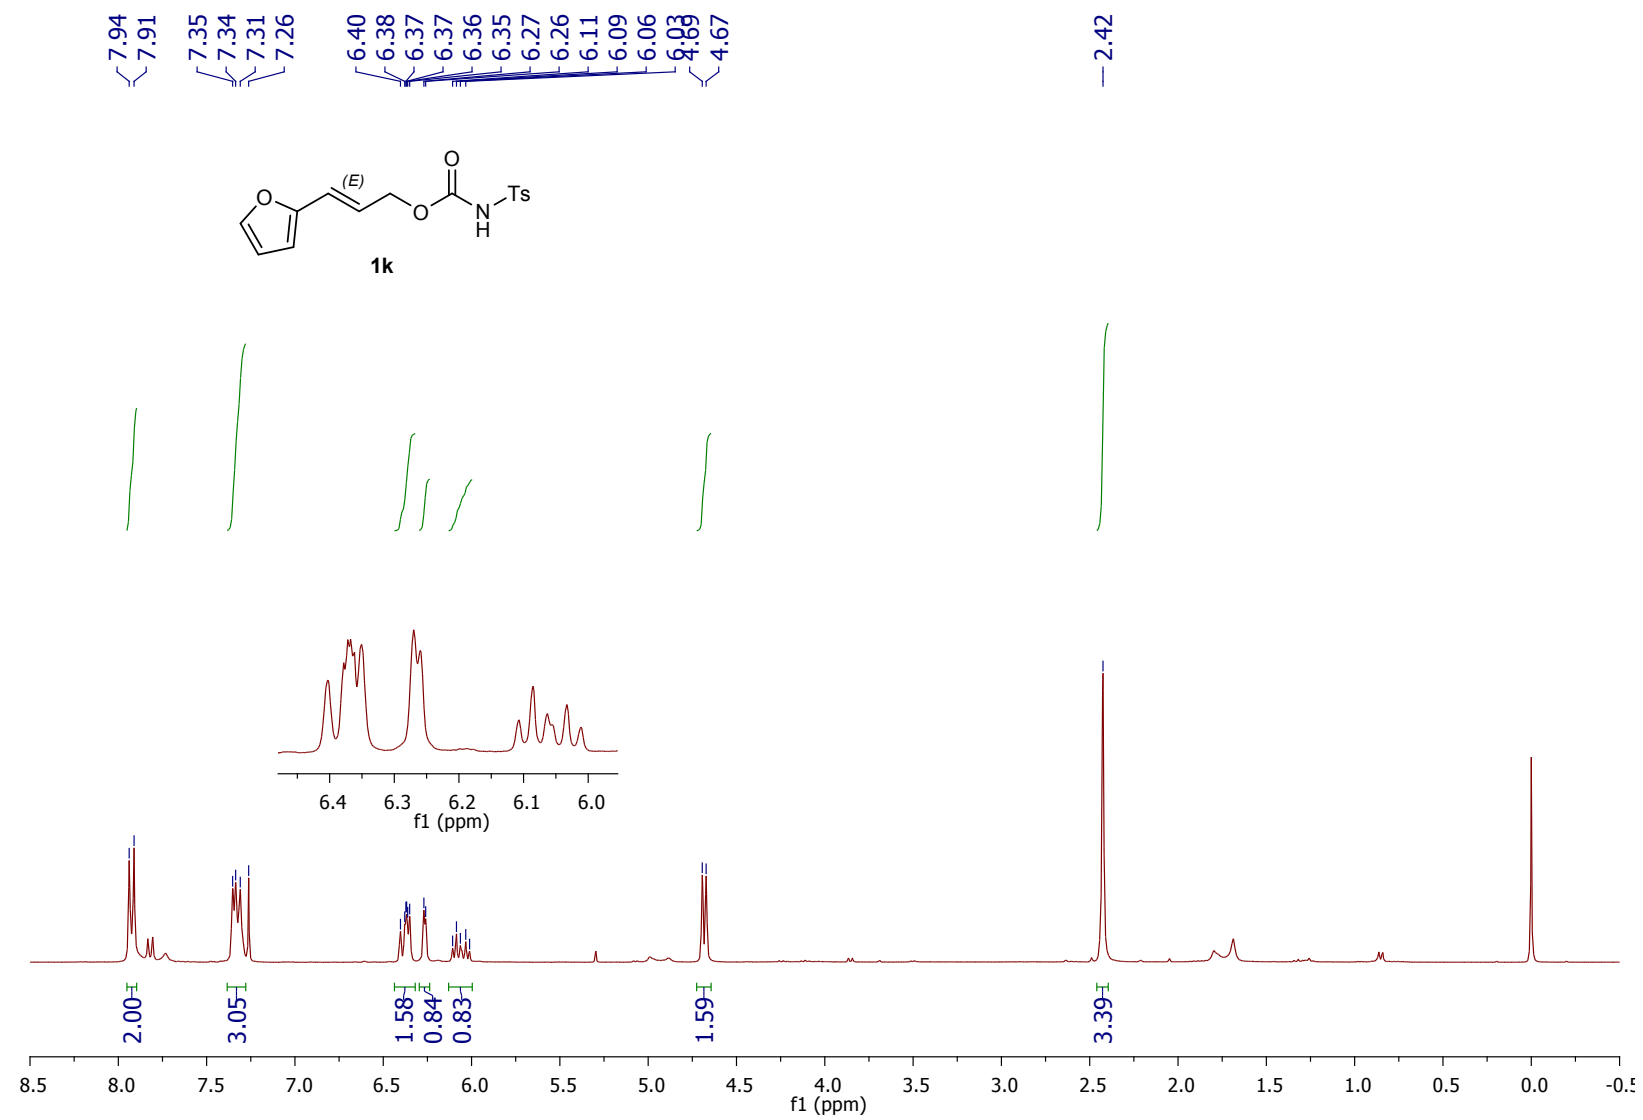

<sup>1</sup>H NMR (300 MHz, CDCl<sub>3</sub>) of substrate **1I**

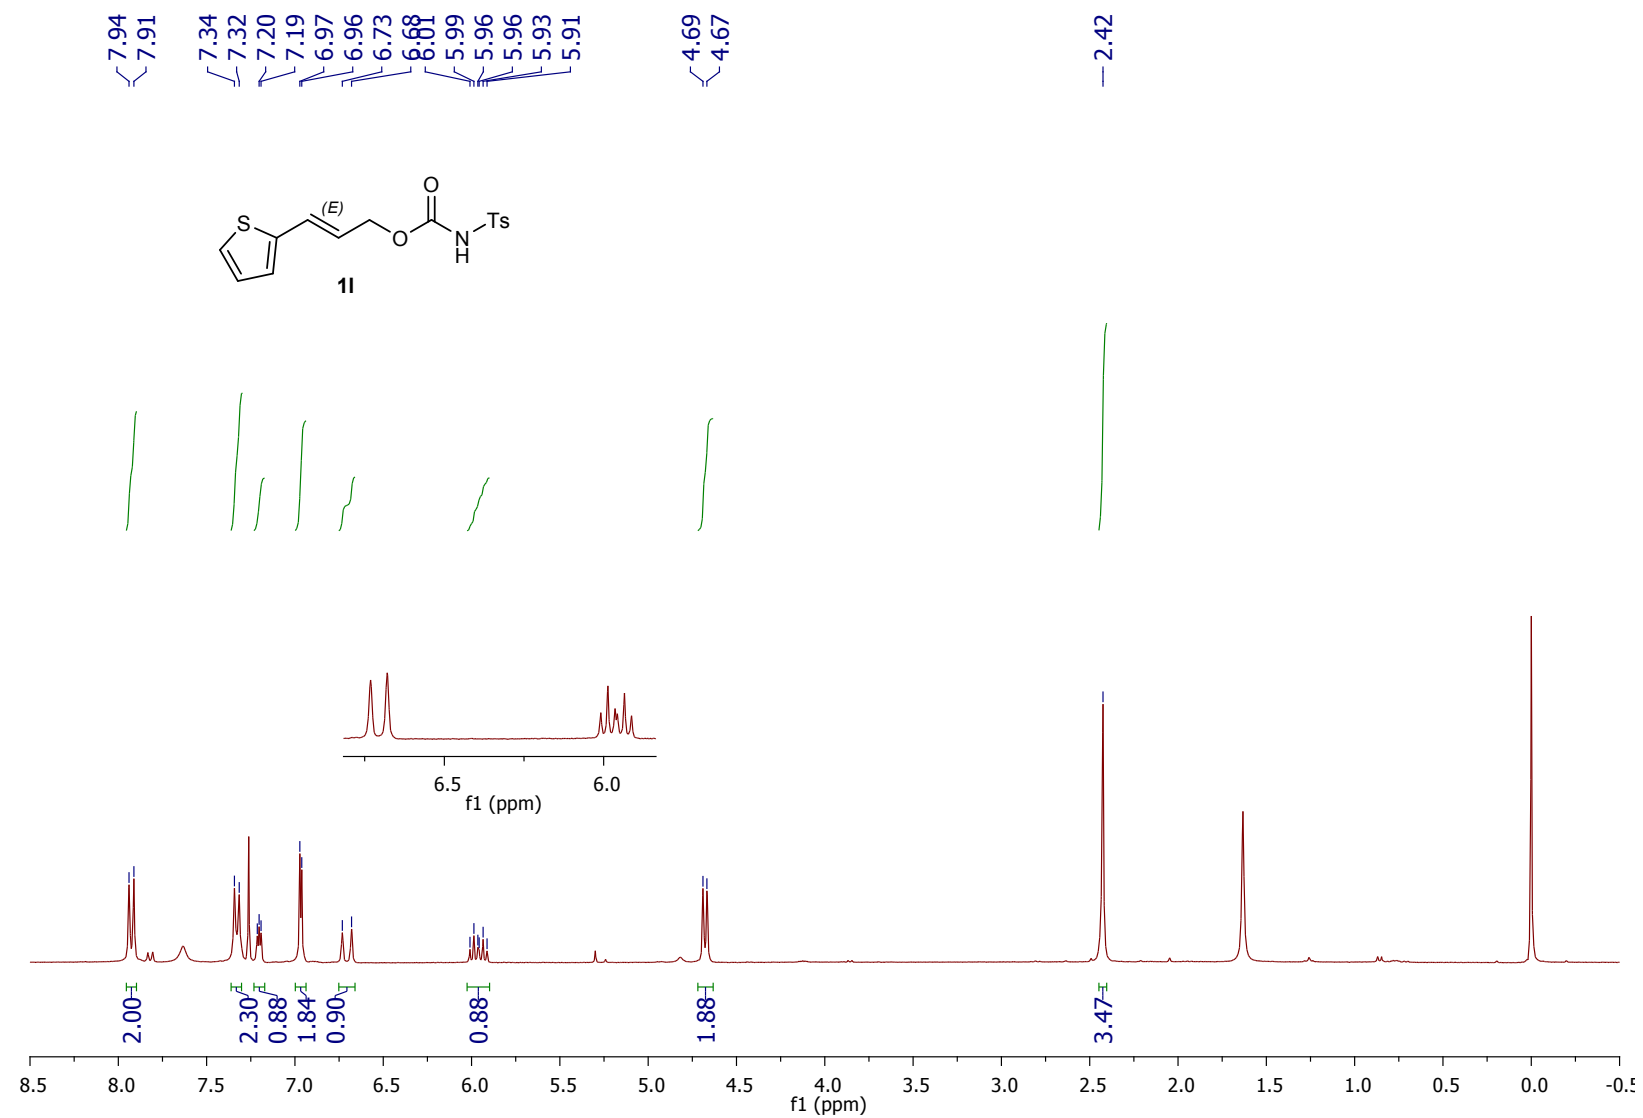



<sup>1</sup>H NMR (300 MHz, CDCl<sub>3</sub>) of substrate **1m**

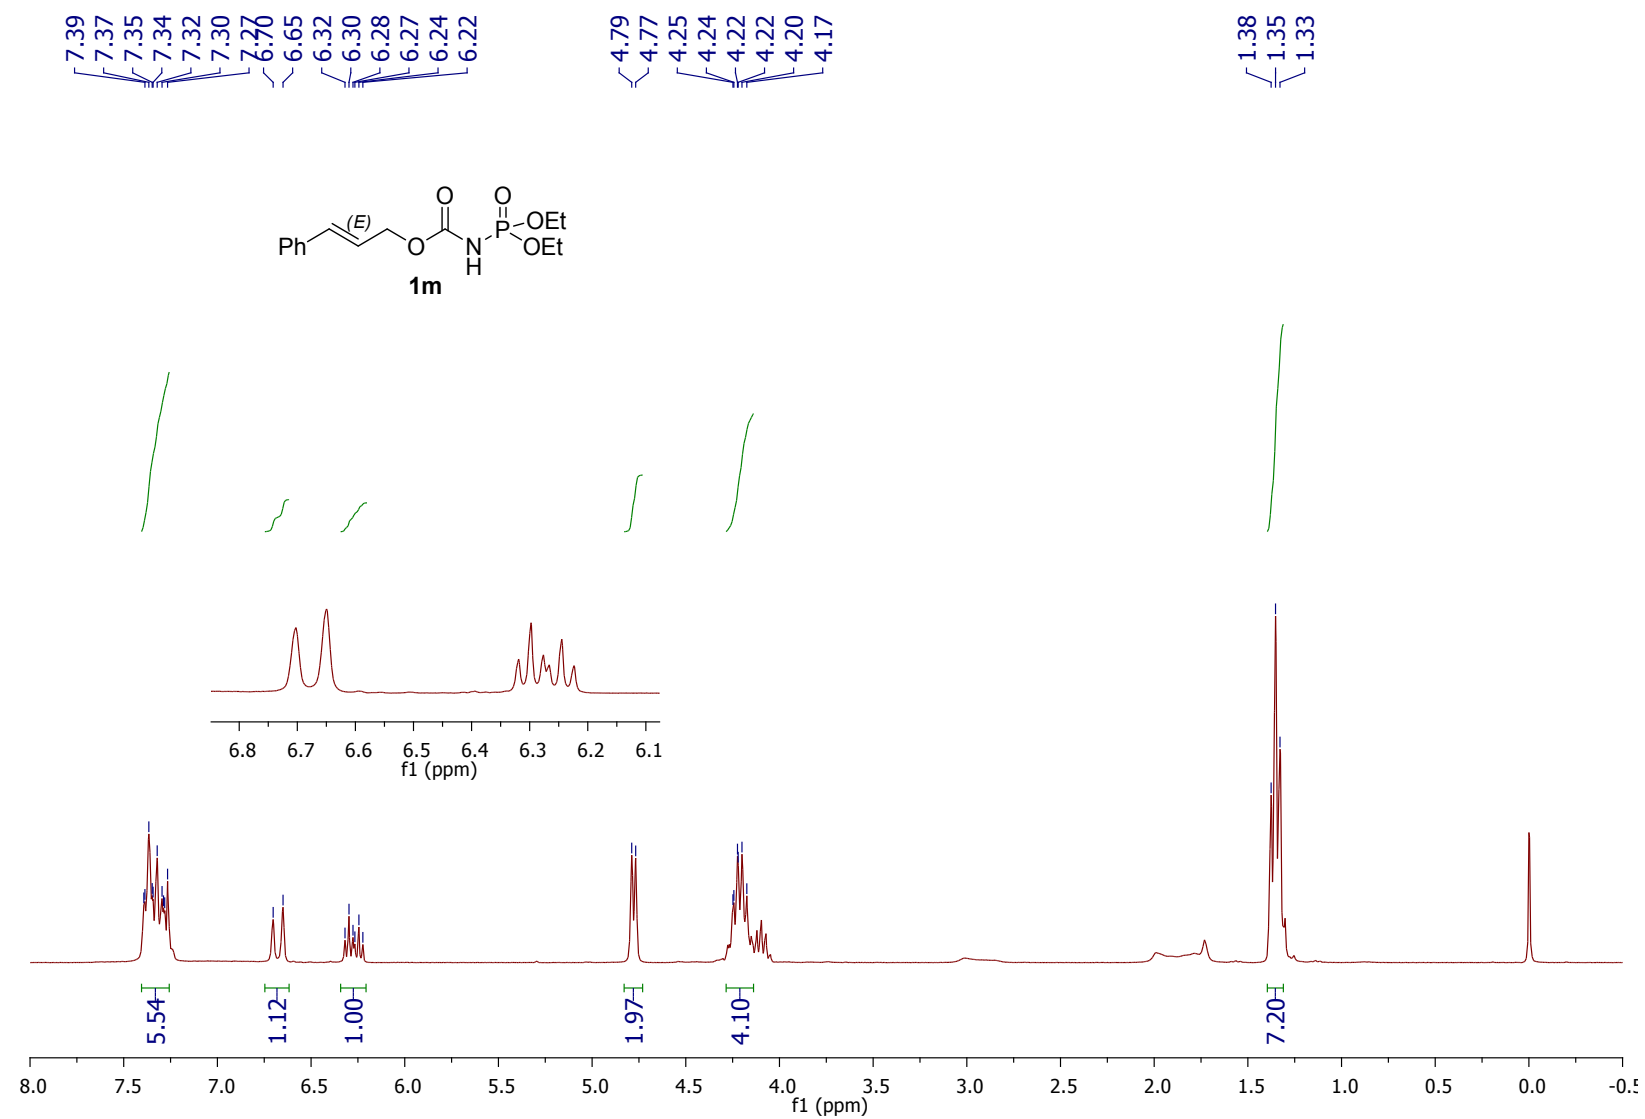

<sup>13</sup>C NMR (75 MHz, CDCl<sub>3</sub>) of substrate **1m**

— 153.40

136.12  
134.49  
128.63  
128.15  
126.61  
122.72

66.52  
64.13  
64.06

16.11  
16.02

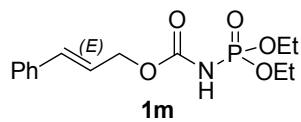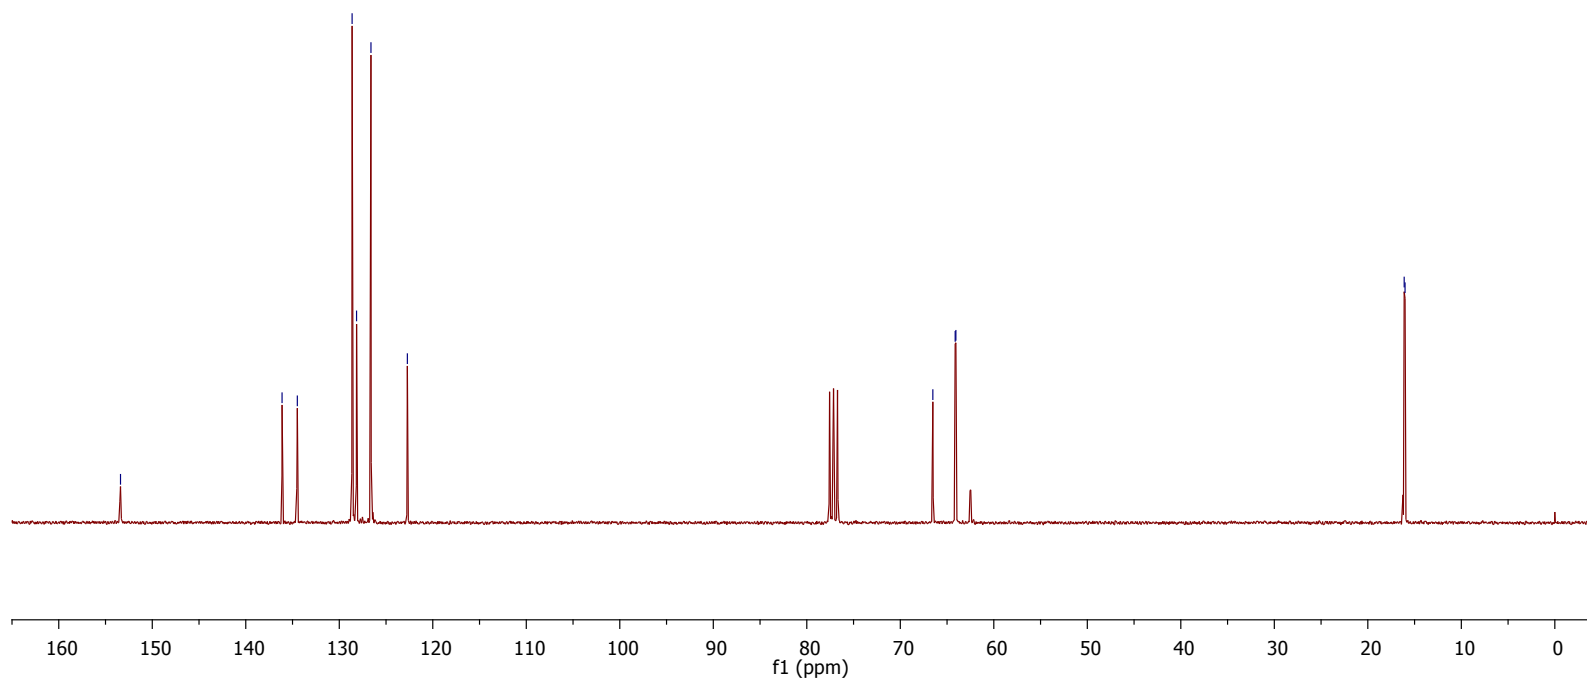

<sup>1</sup>H NMR (300 MHz, CDCl<sub>3</sub>) of substrate **1n**

7.40  
7.38  
7.34  
7.33  
7.32  
7.30  
6.71  
6.66  
6.37  
6.35  
6.33  
6.32  
6.30  
6.28

4.83  
4.83  
4.81  
4.81

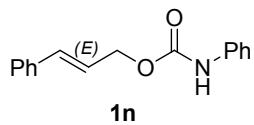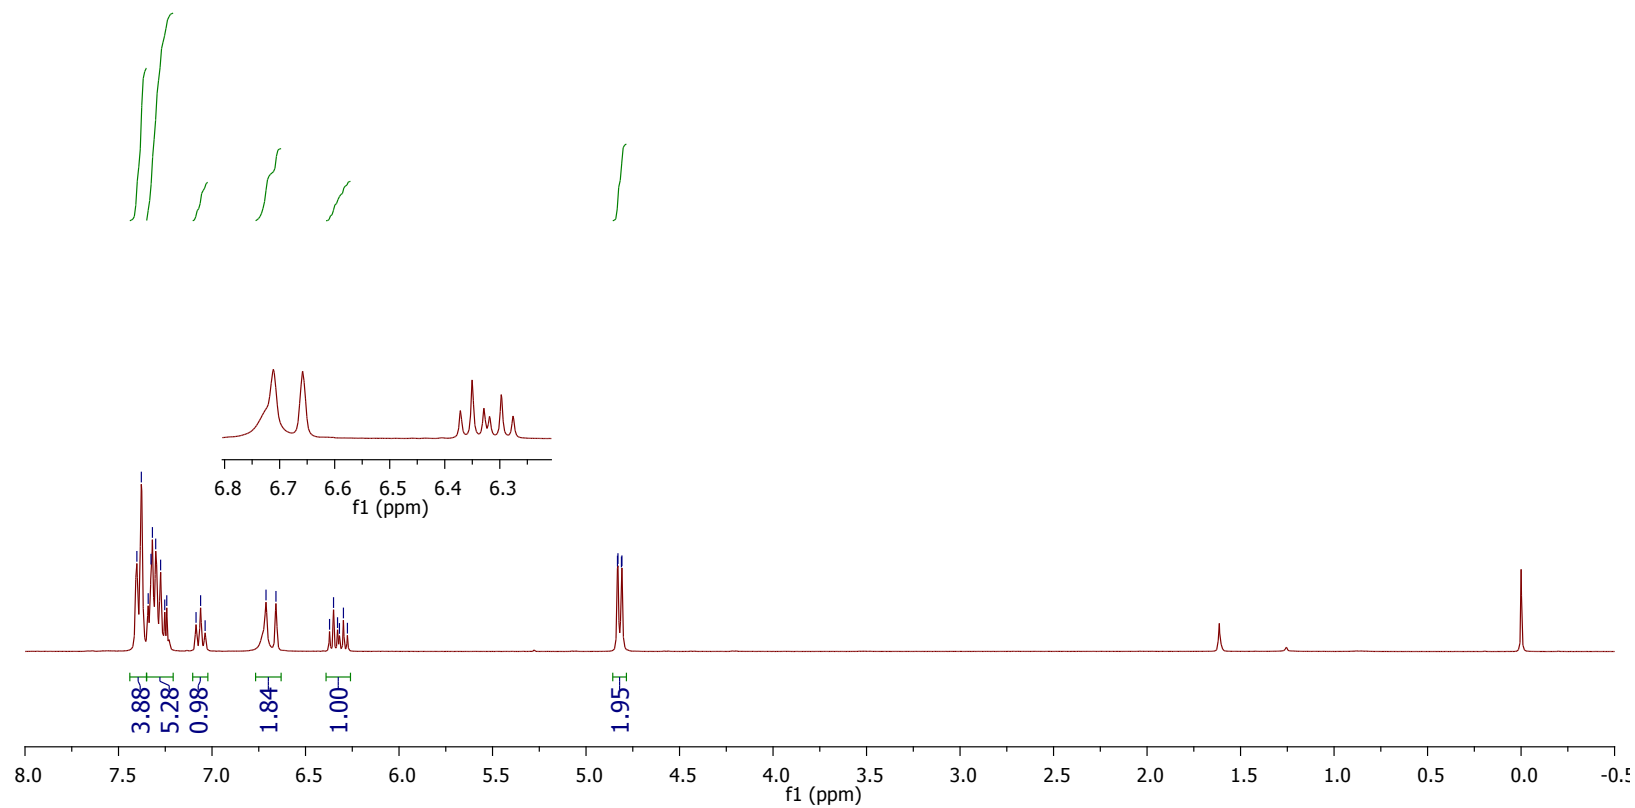

<sup>13</sup>C NMR (75 MHz, CDCl<sub>3</sub>) of substrate **1n**

— 153.33

137.79  
136.18  
134.23  
129.07  
128.62  
128.10  
126.64  
123.53  
123.34  
118.77

— 65.77

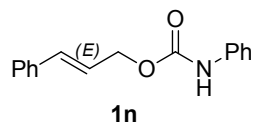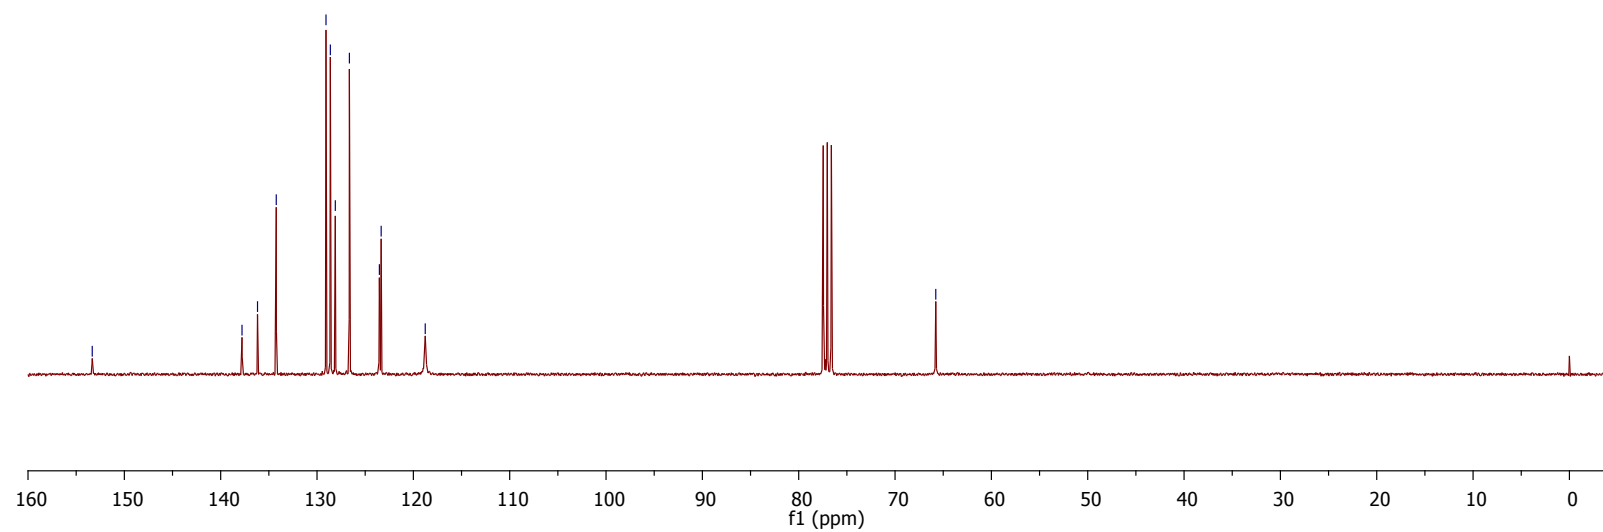

<sup>1</sup>H NMR (300 MHz, CDCl<sub>3</sub>) of substrate **1o**

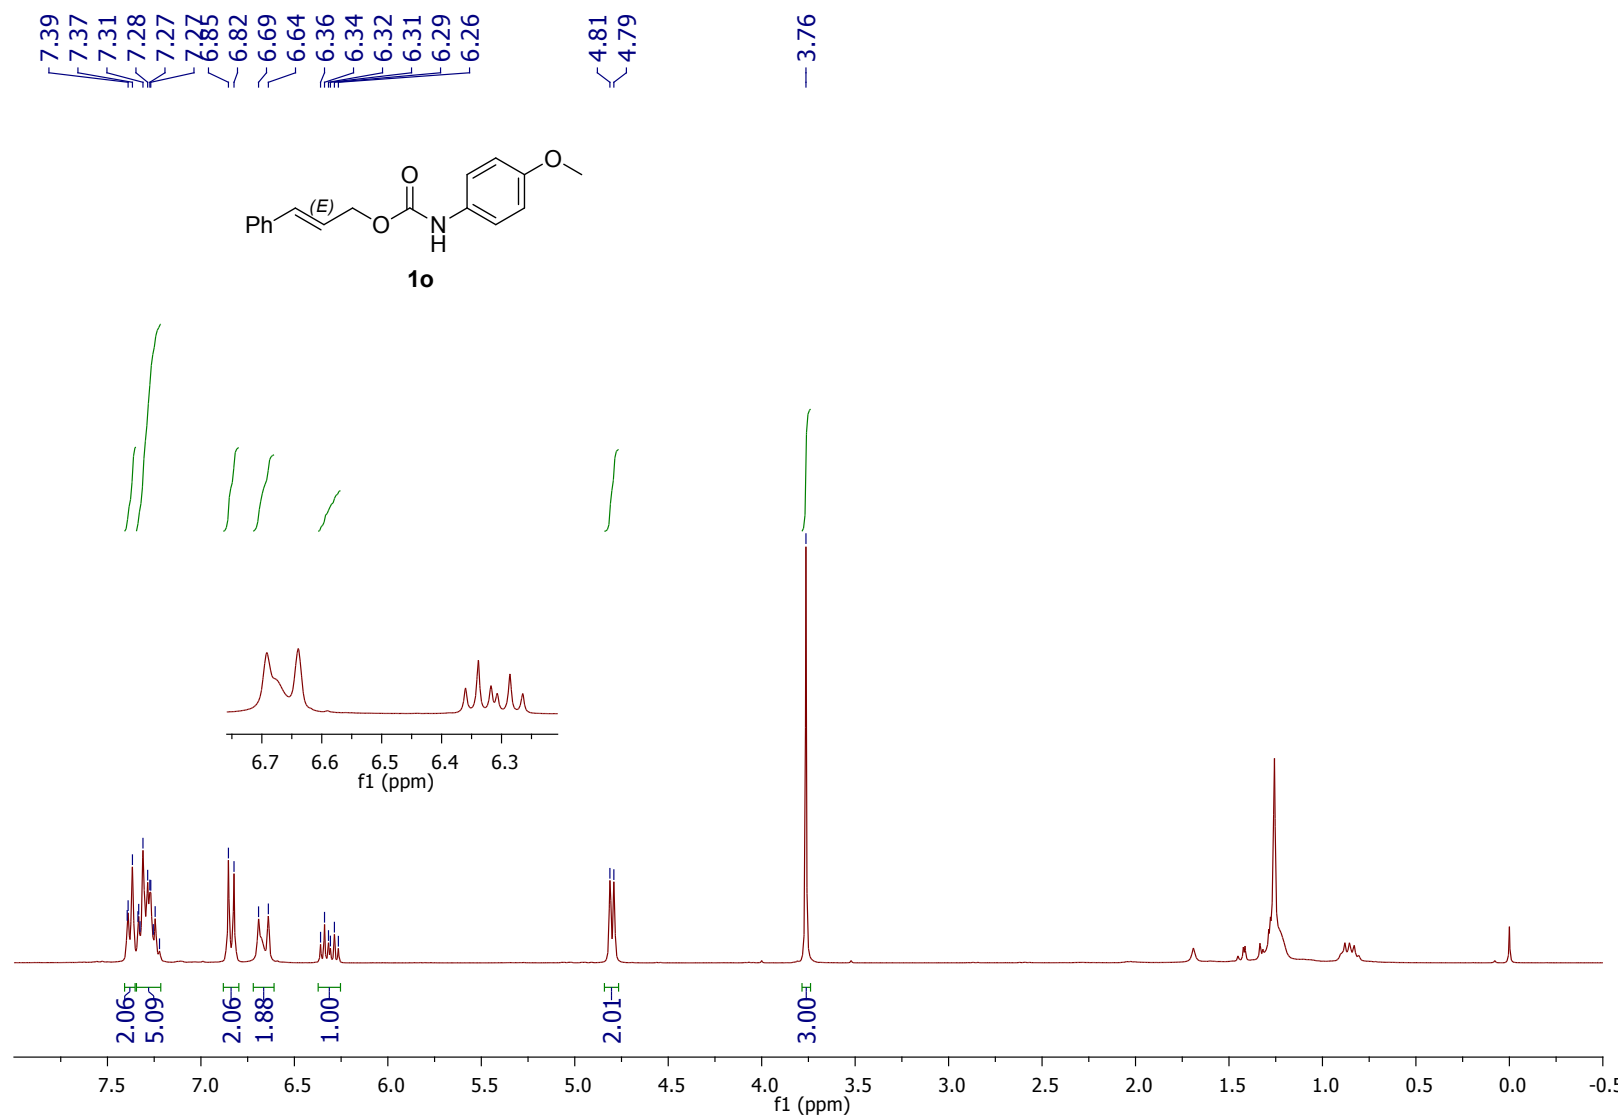

$^{13}\text{C}$  NMR (75 MHz,  $\text{CDCl}_3$ ) of substrate **1o**

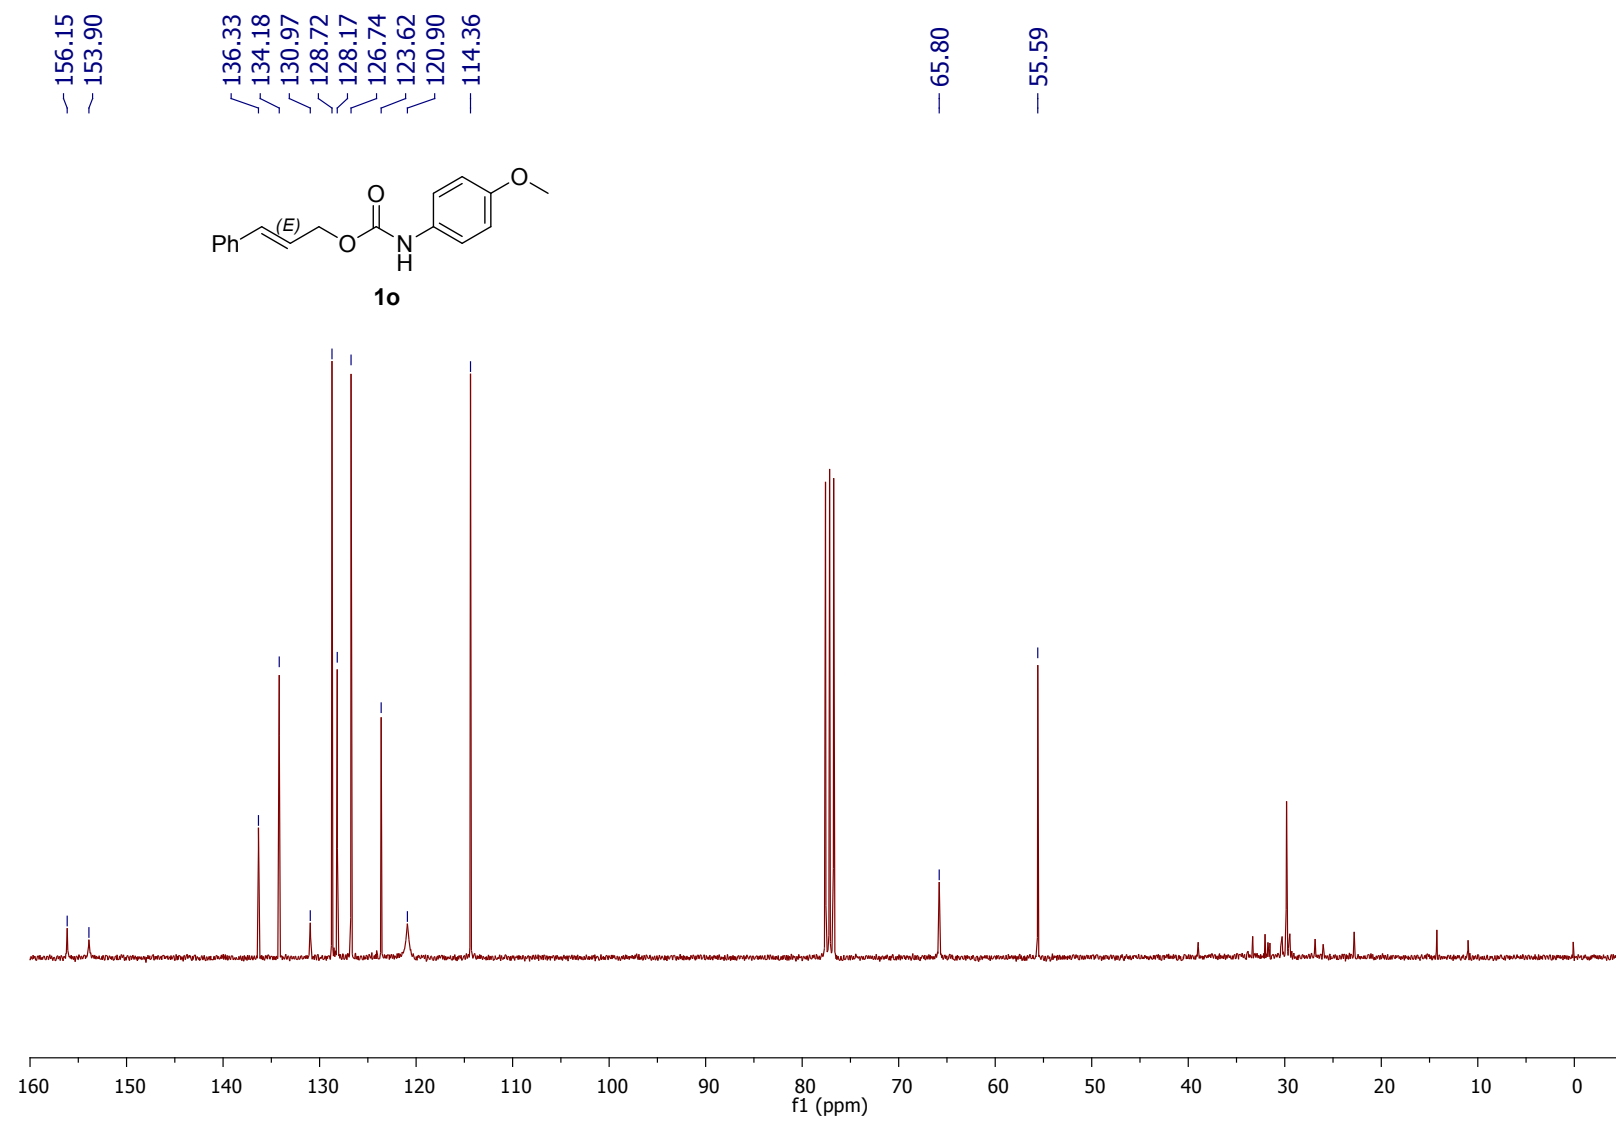

<sup>1</sup>H NMR (300 MHz, CDCl<sub>3</sub>) of substrate **1p**

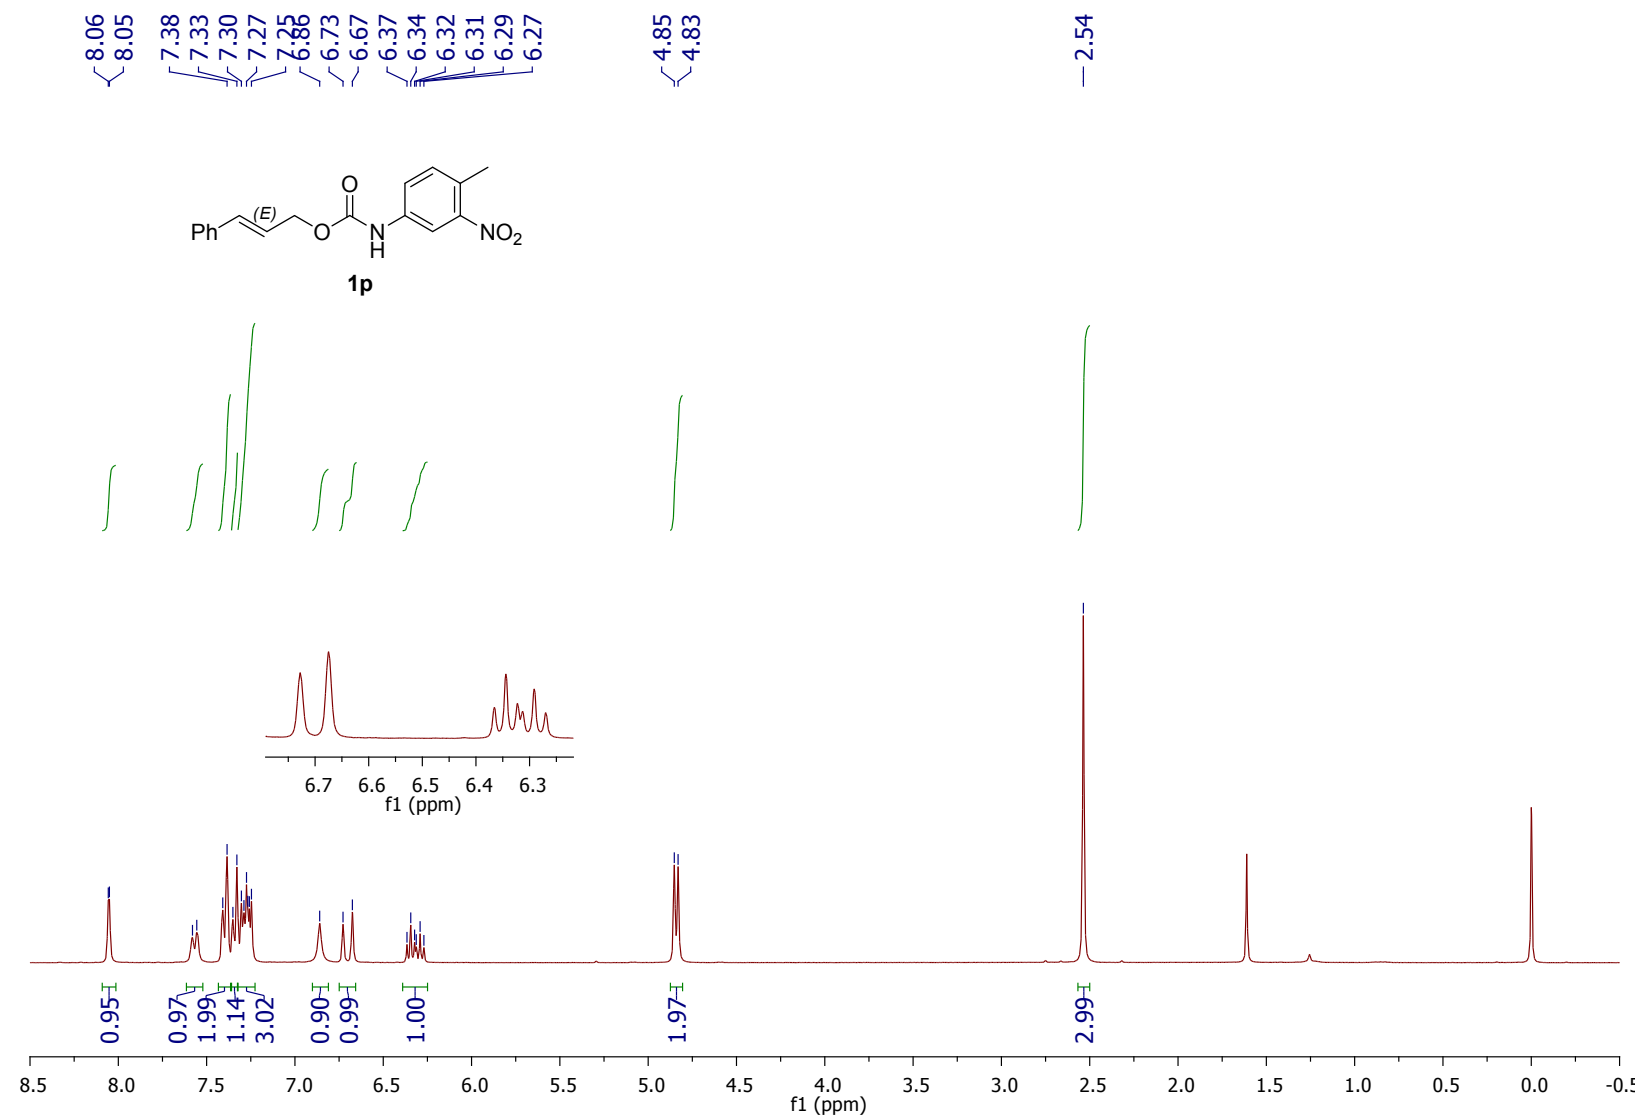

<sup>13</sup>C NMR (75 MHz, CDCl<sub>3</sub>) of substrate **1p**

— 153.23  
— 149.36  
— 136.91  
— 136.15  
— 134.86  
— 133.40  
— 128.79  
— 128.38  
— 128.33  
— 126.80  
— 123.15  
— 122.95  
— 114.69

— 66.37

— 19.97

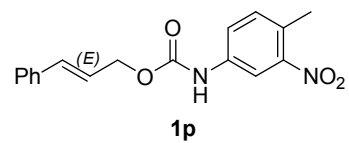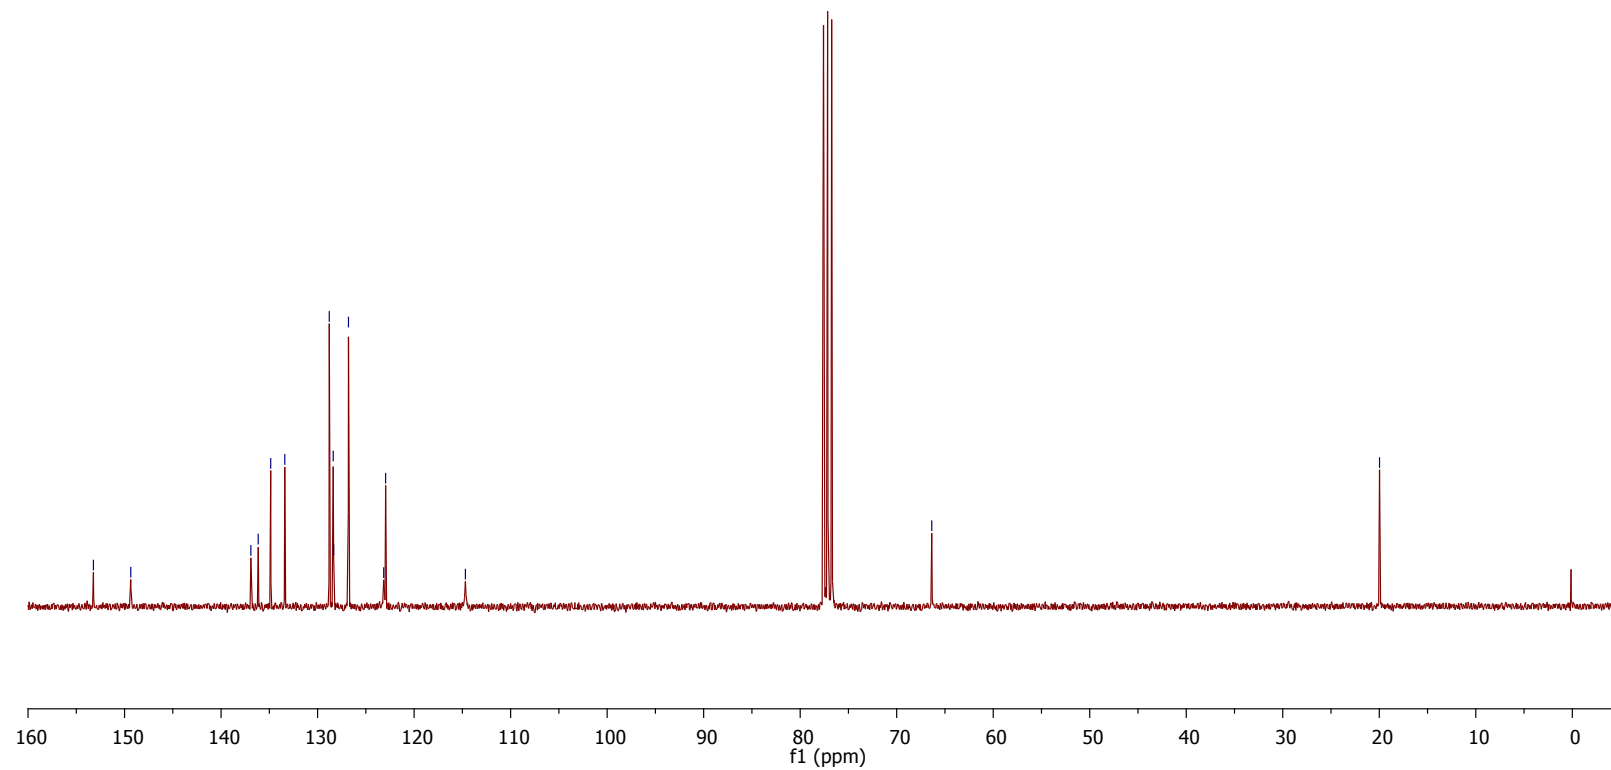



<sup>1</sup>H NMR (300 MHz, Acetone-*d*<sub>6</sub>) of substrate **1q**

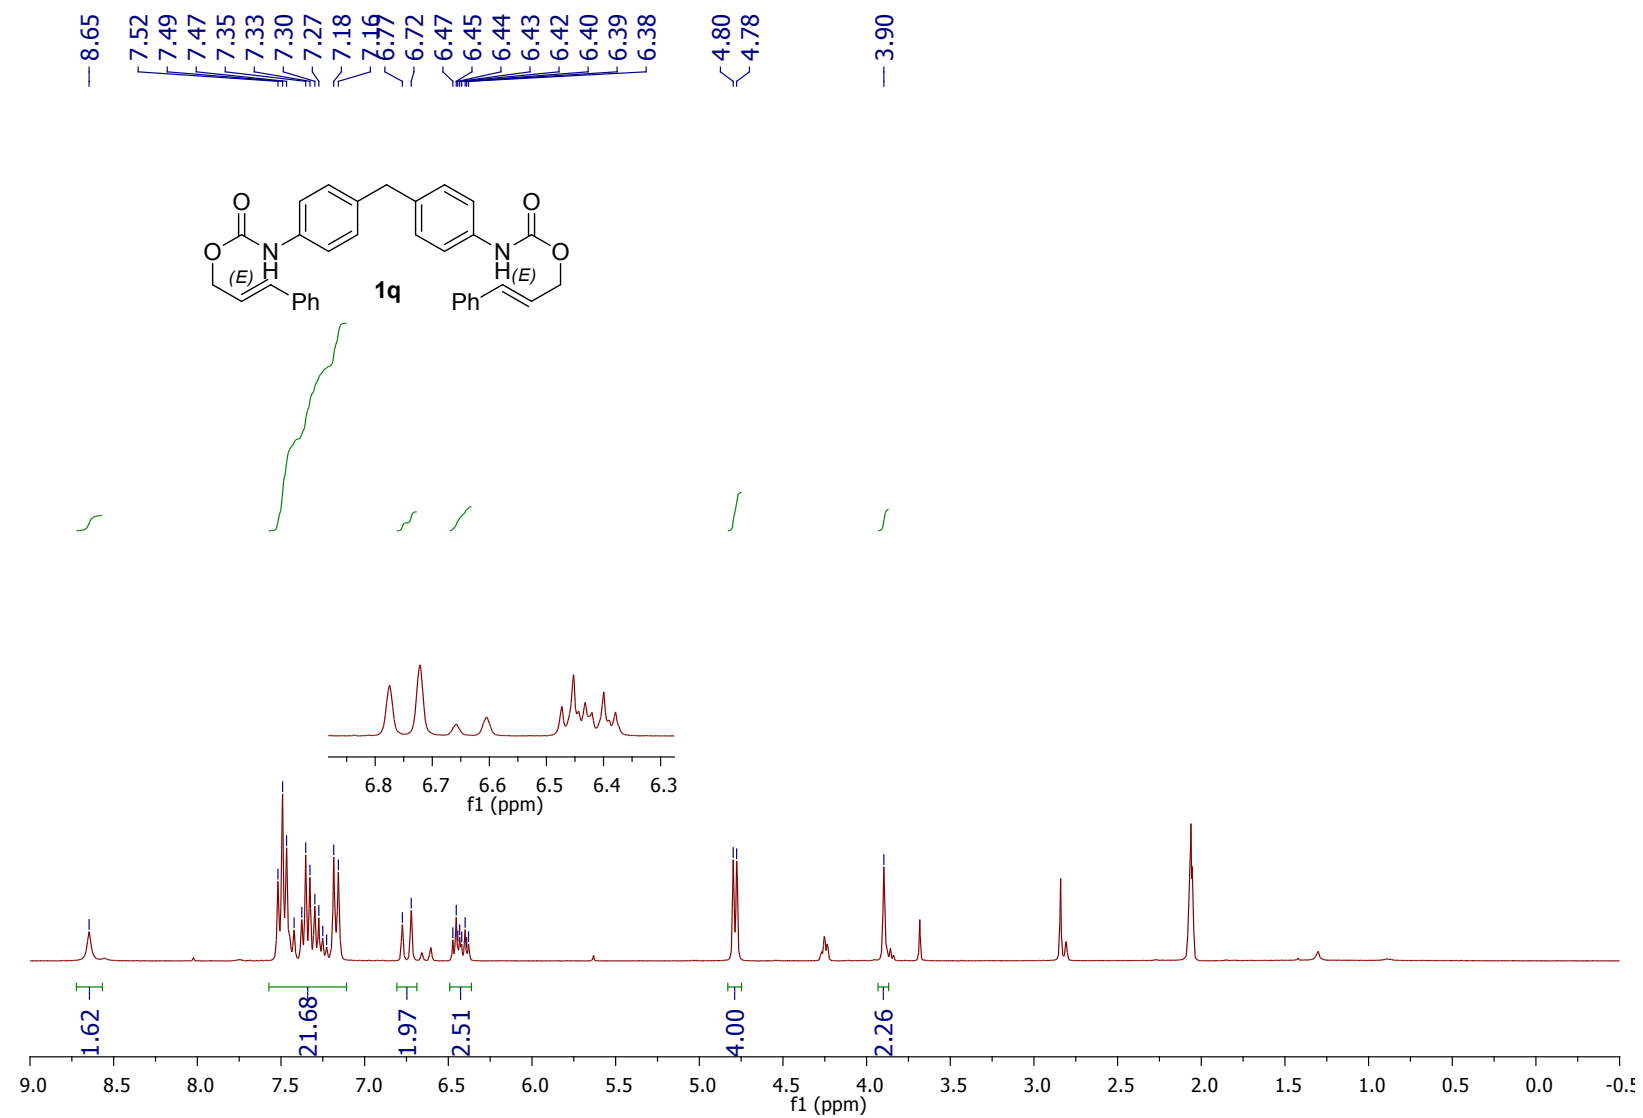

<sup>13</sup>C NMR (75 MHz, Acetone-d<sub>6</sub>) of substrate **1q**

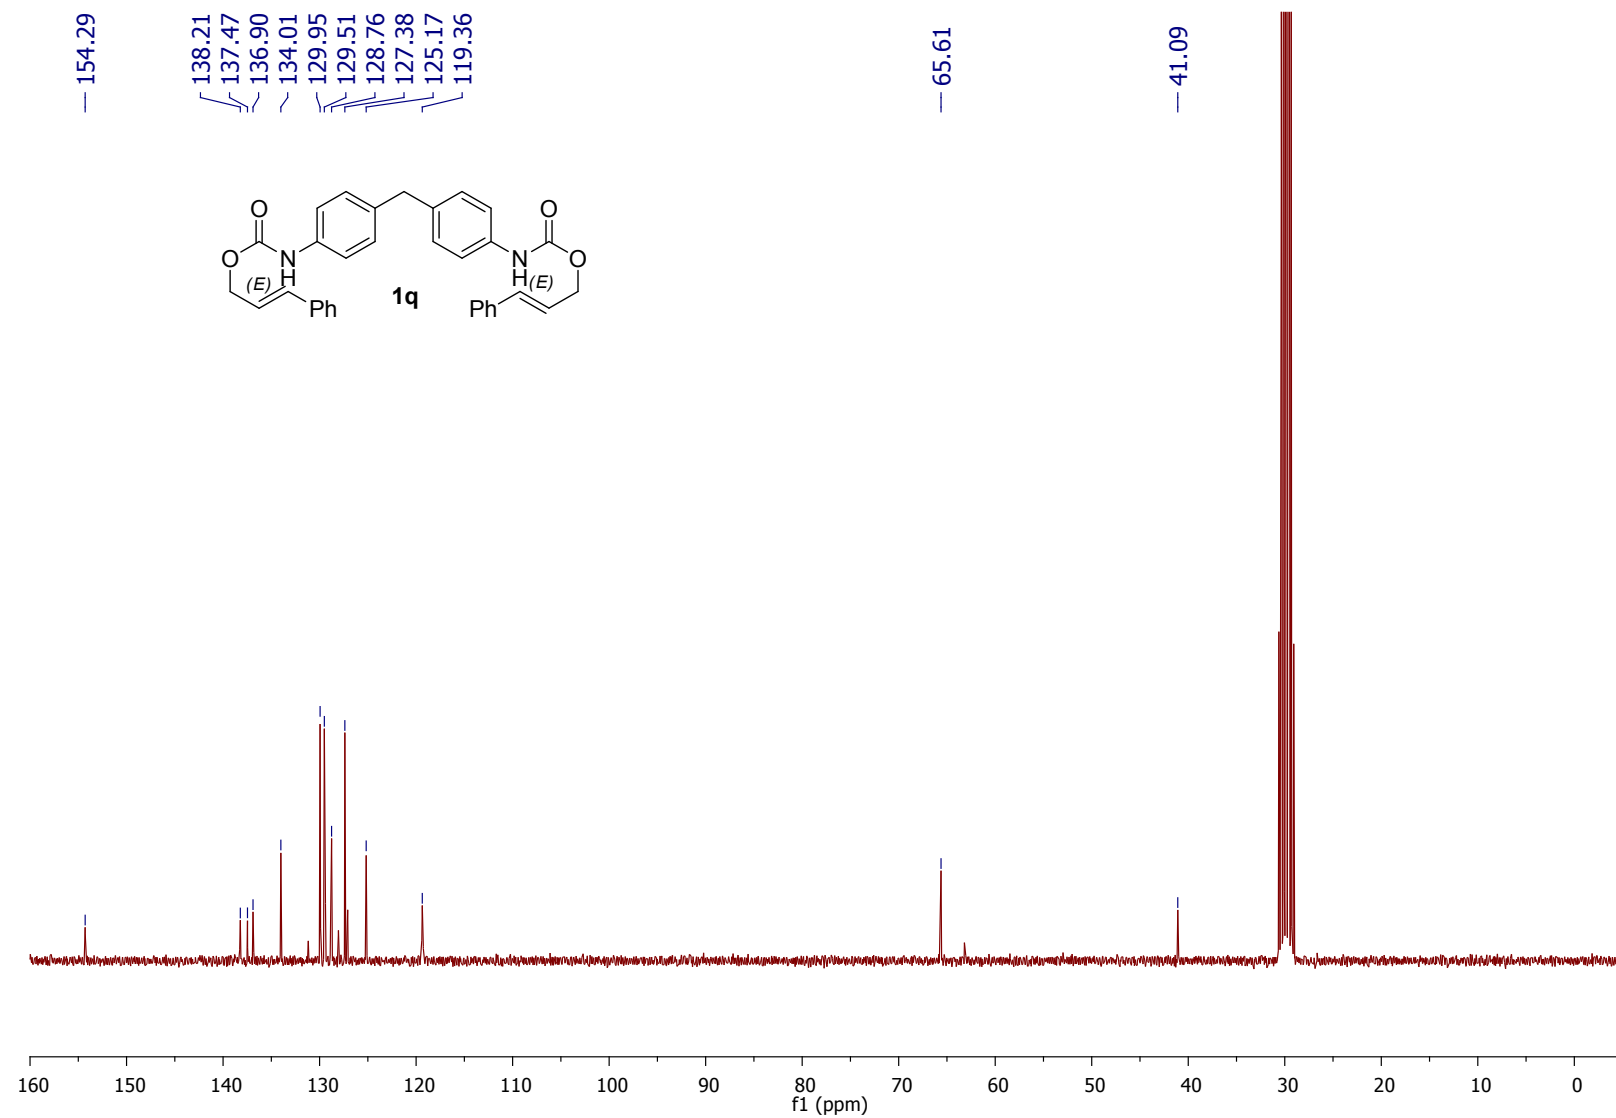

<sup>1</sup>H NMR (300 MHz, CDCl<sub>3</sub>) of substrate **1r**

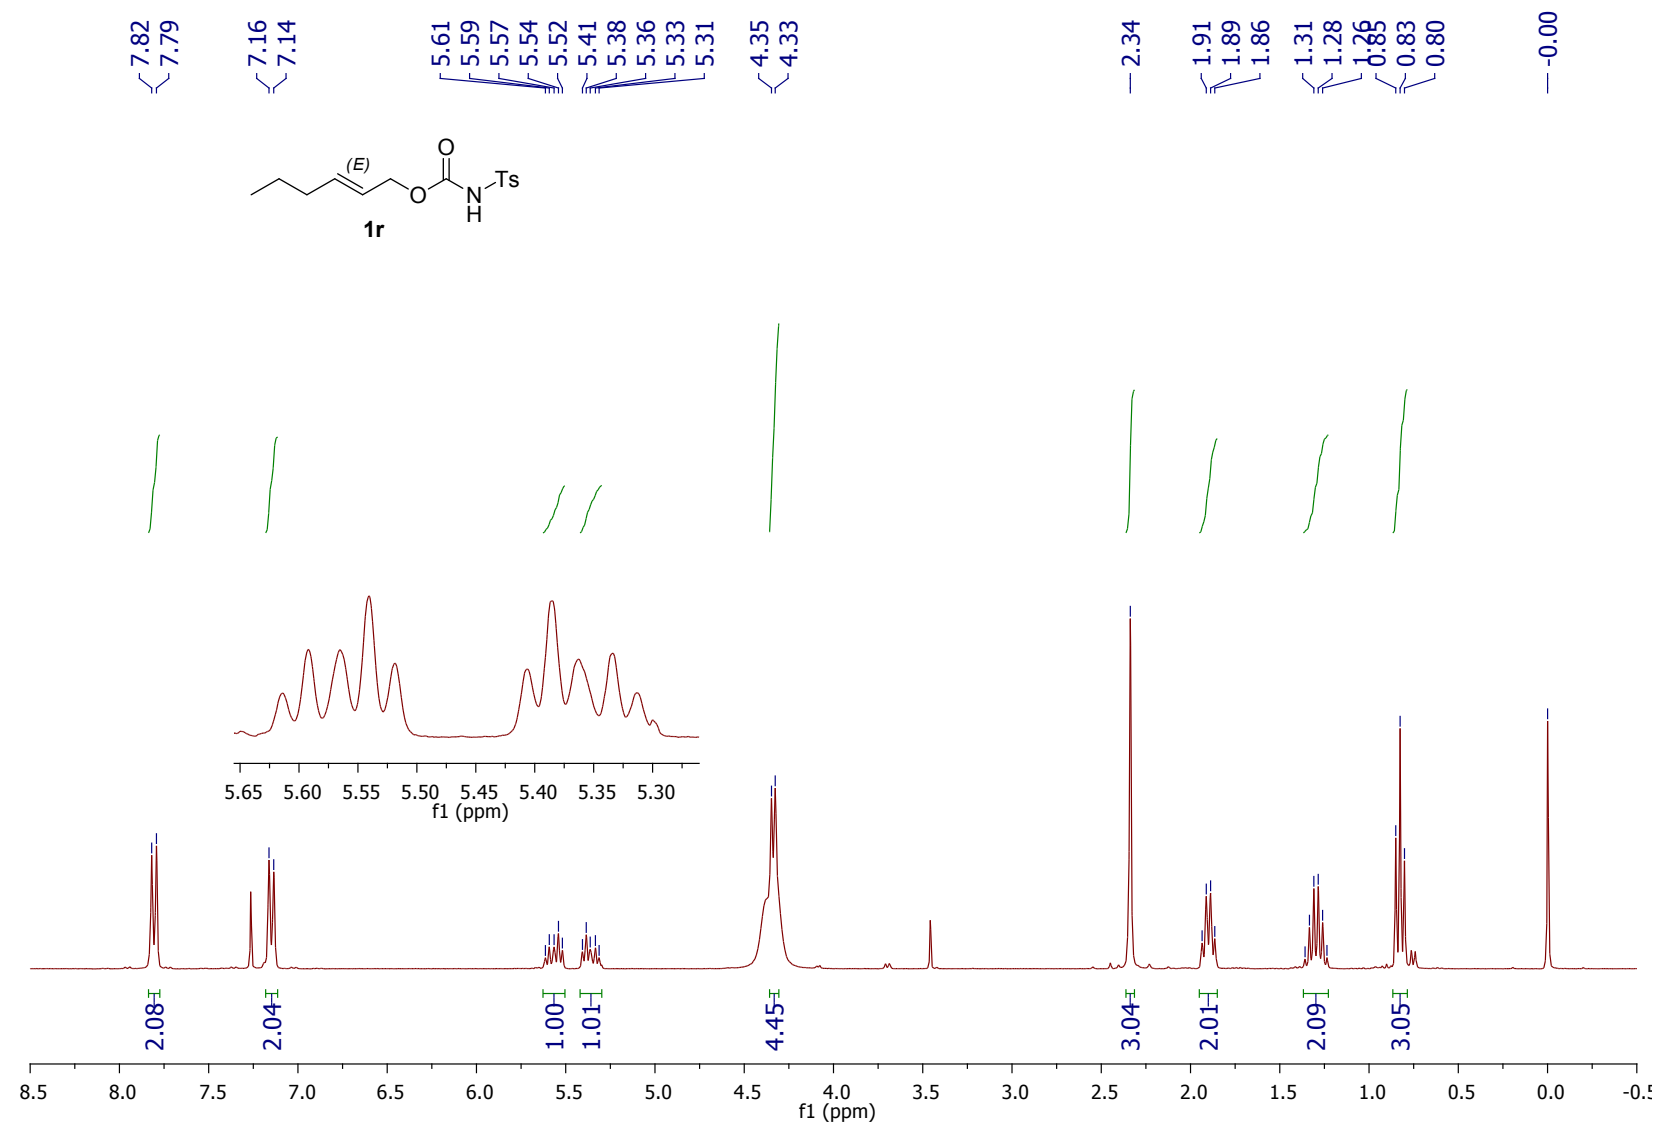

<sup>13</sup>C NMR (75 MHz, CDCl<sub>3</sub>) of substrate **1r**

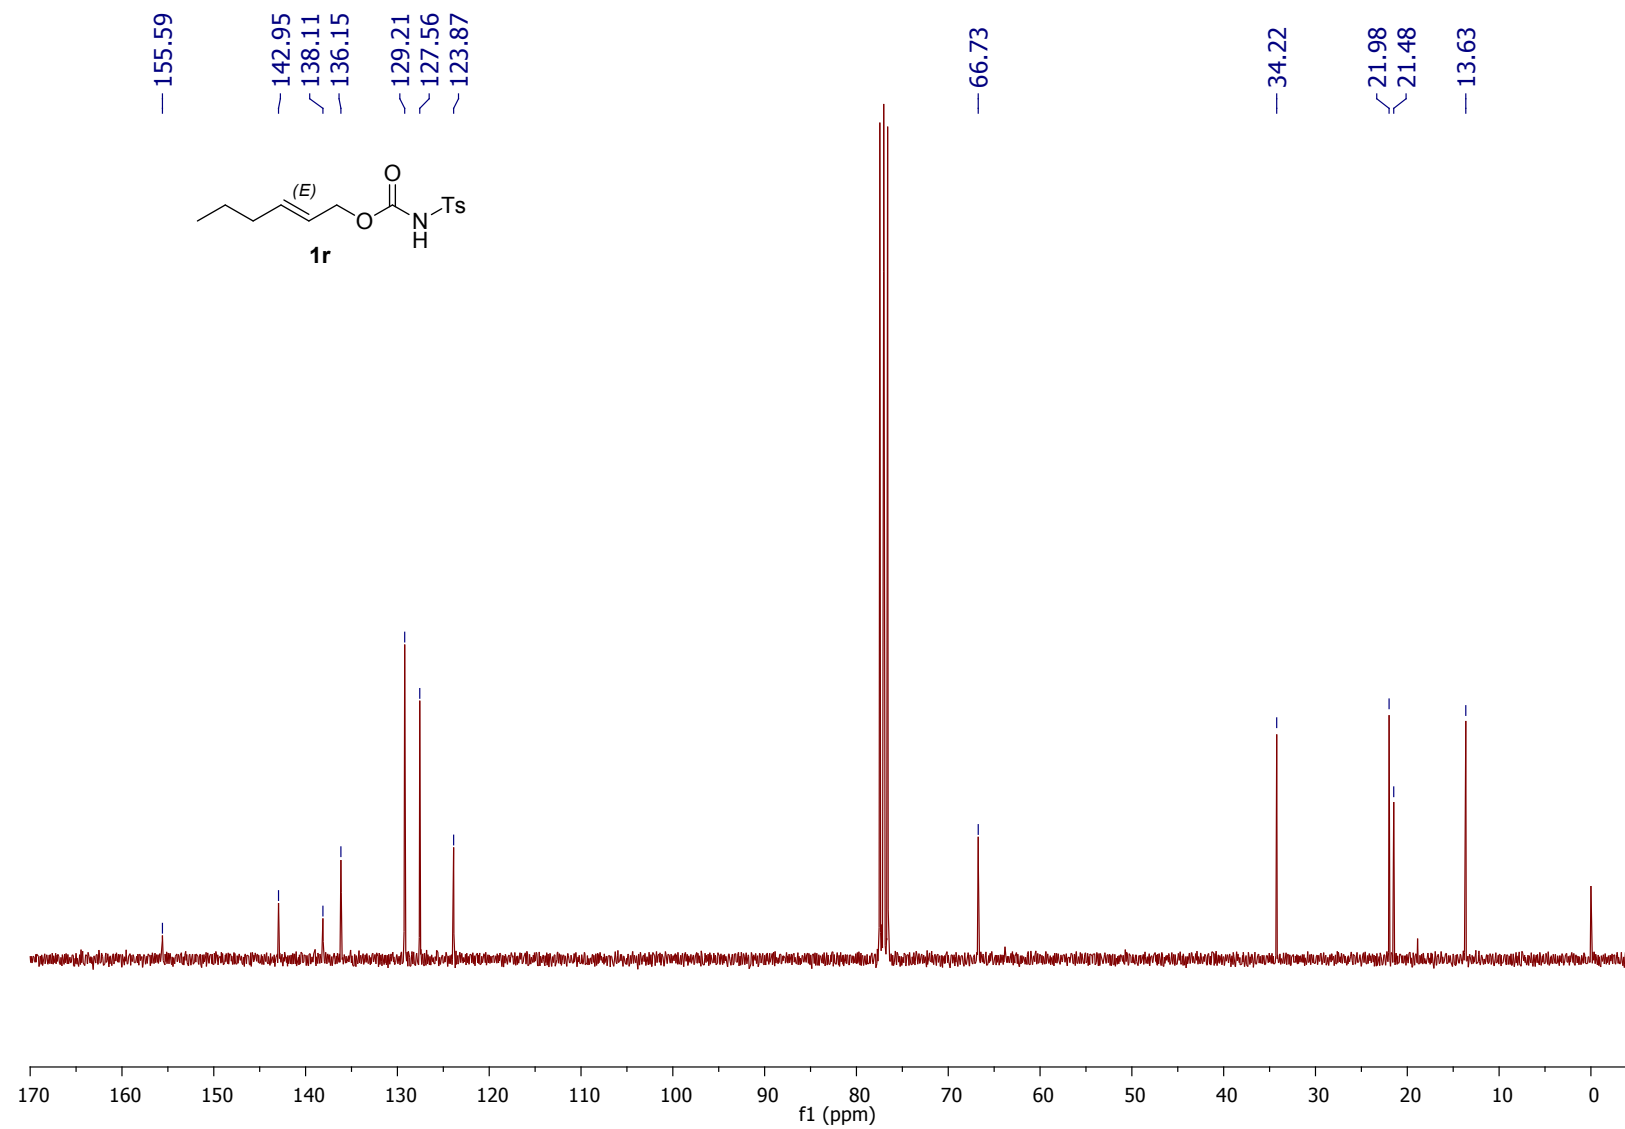

<sup>1</sup>H NMR (300 MHz, CDCl<sub>3</sub>) of substrate **1s**

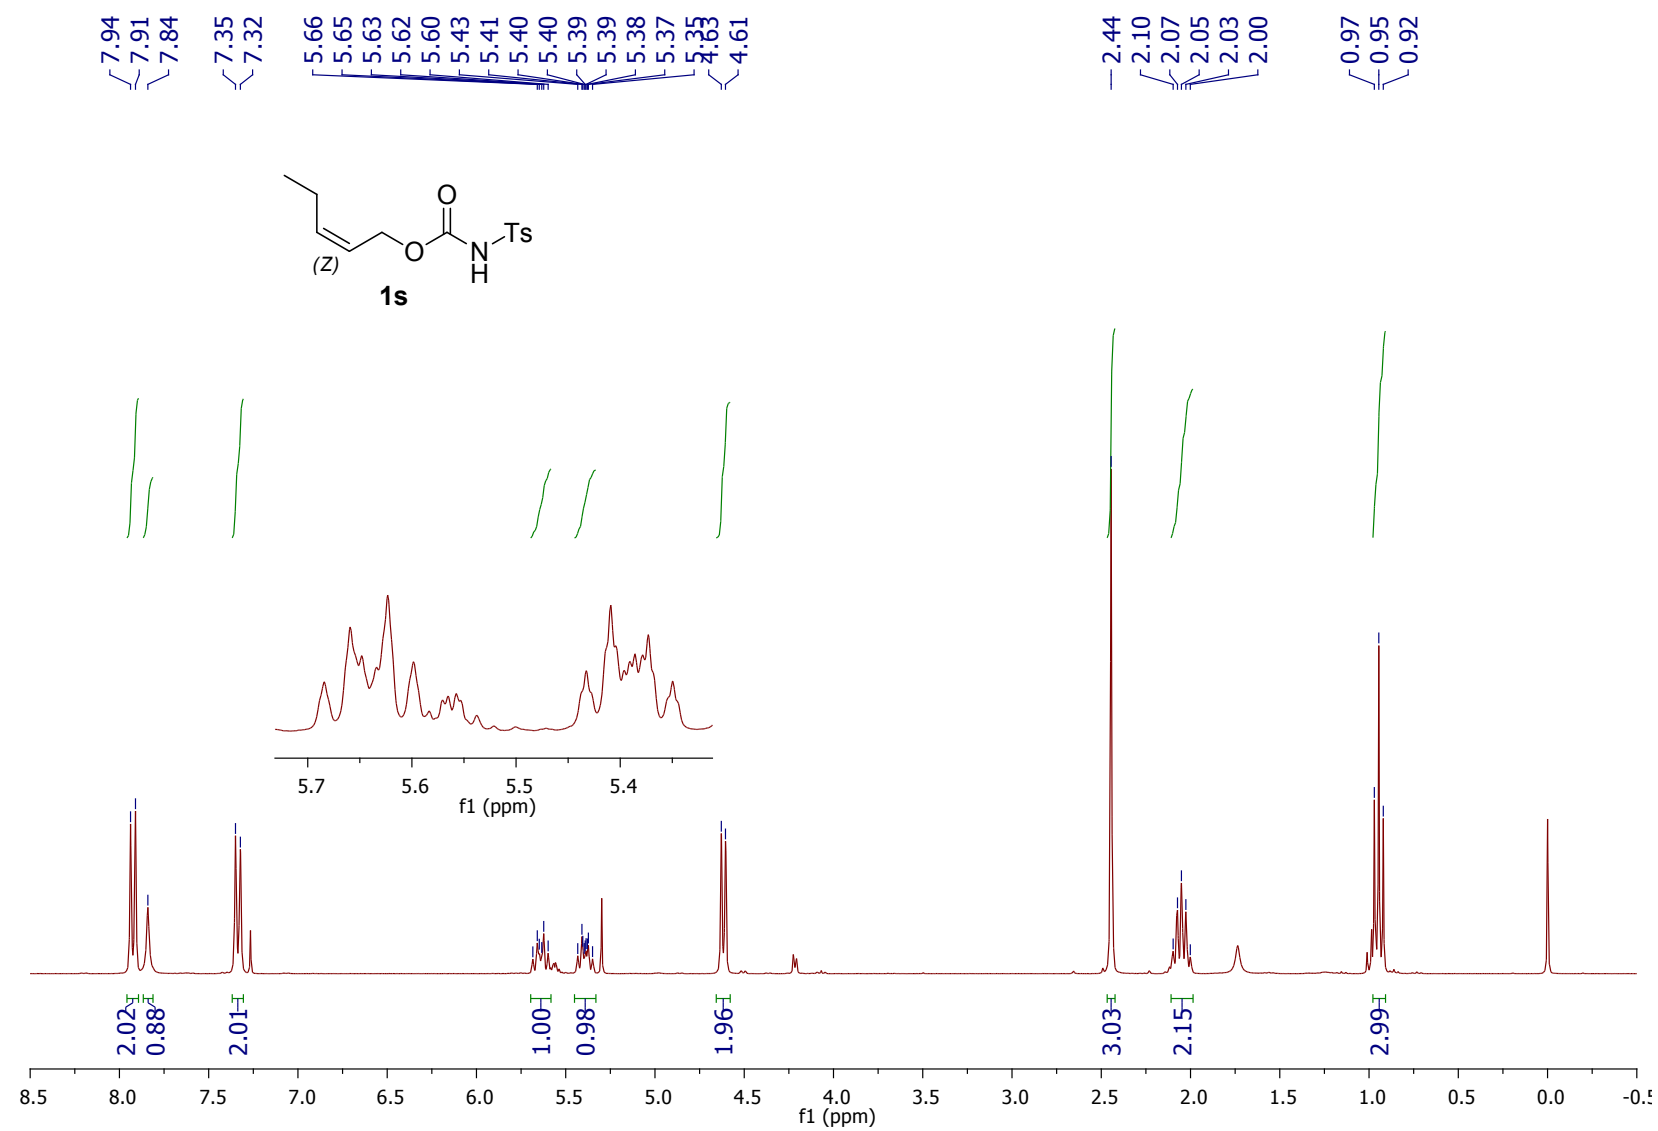

<sup>1</sup>H NMR (300 MHz, CDCl<sub>3</sub>) of substrate **2a**

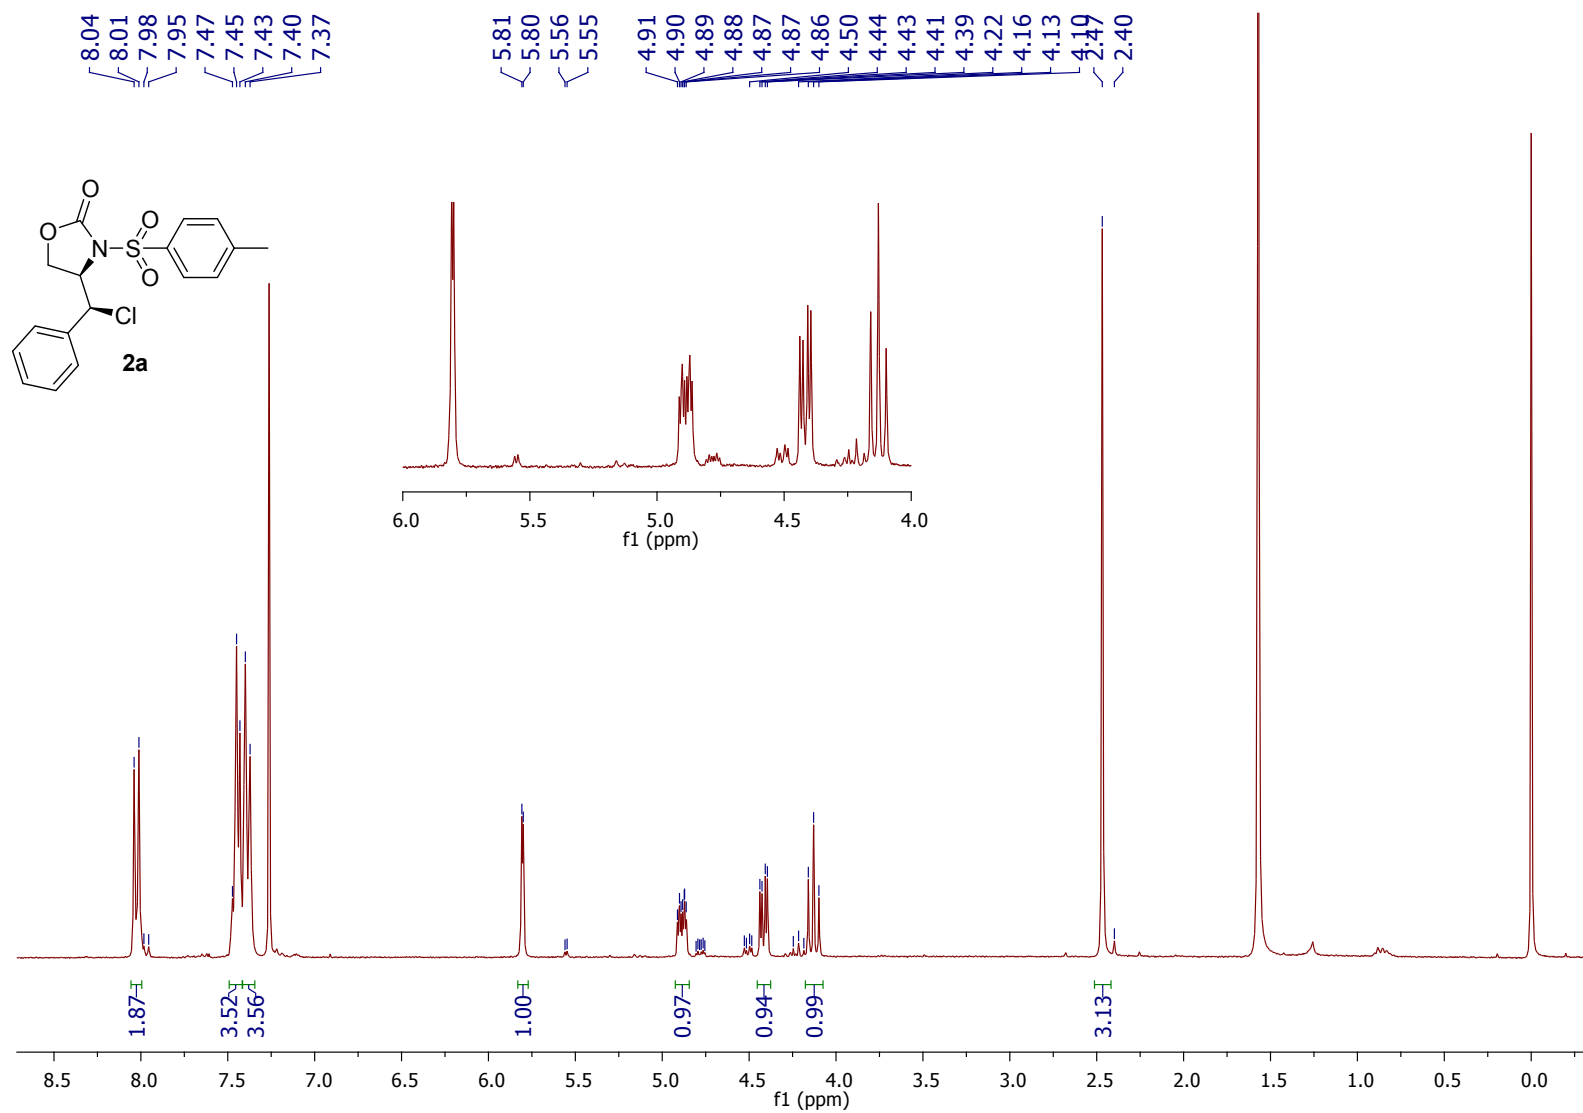

<sup>13</sup>C NMR (75 MHz, CDCl<sub>3</sub>) of substrate **2a**

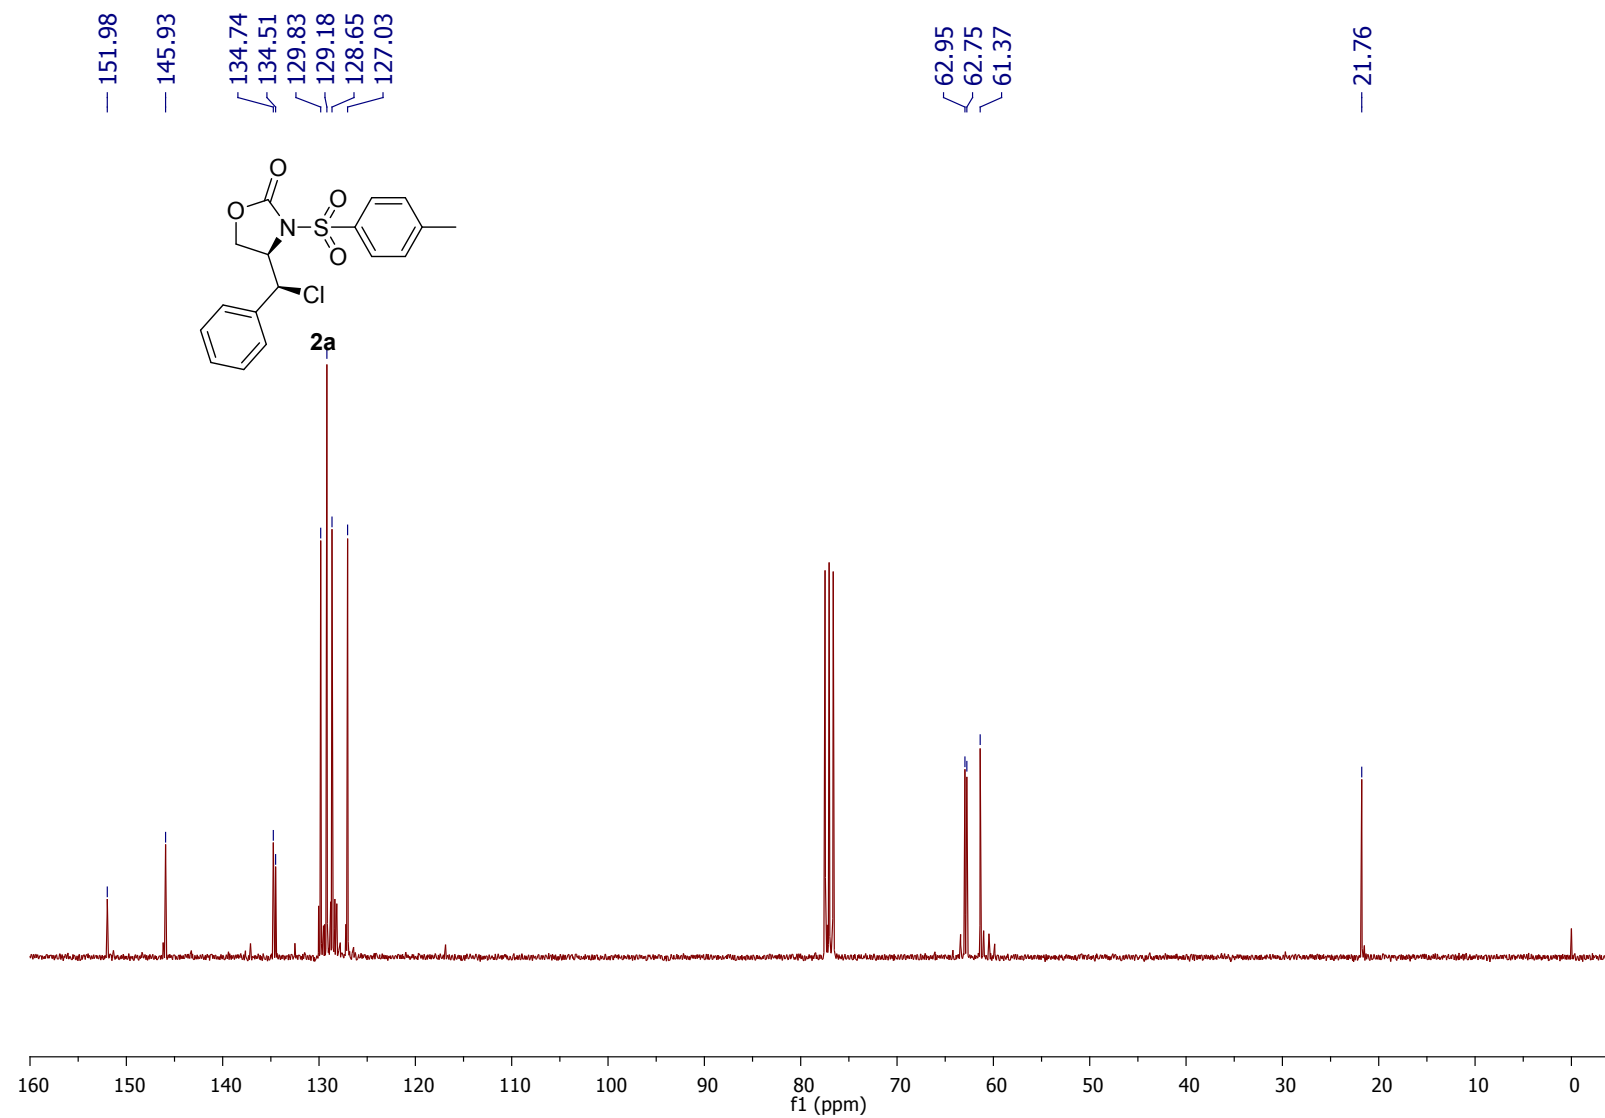

COSY of substrate **2a**

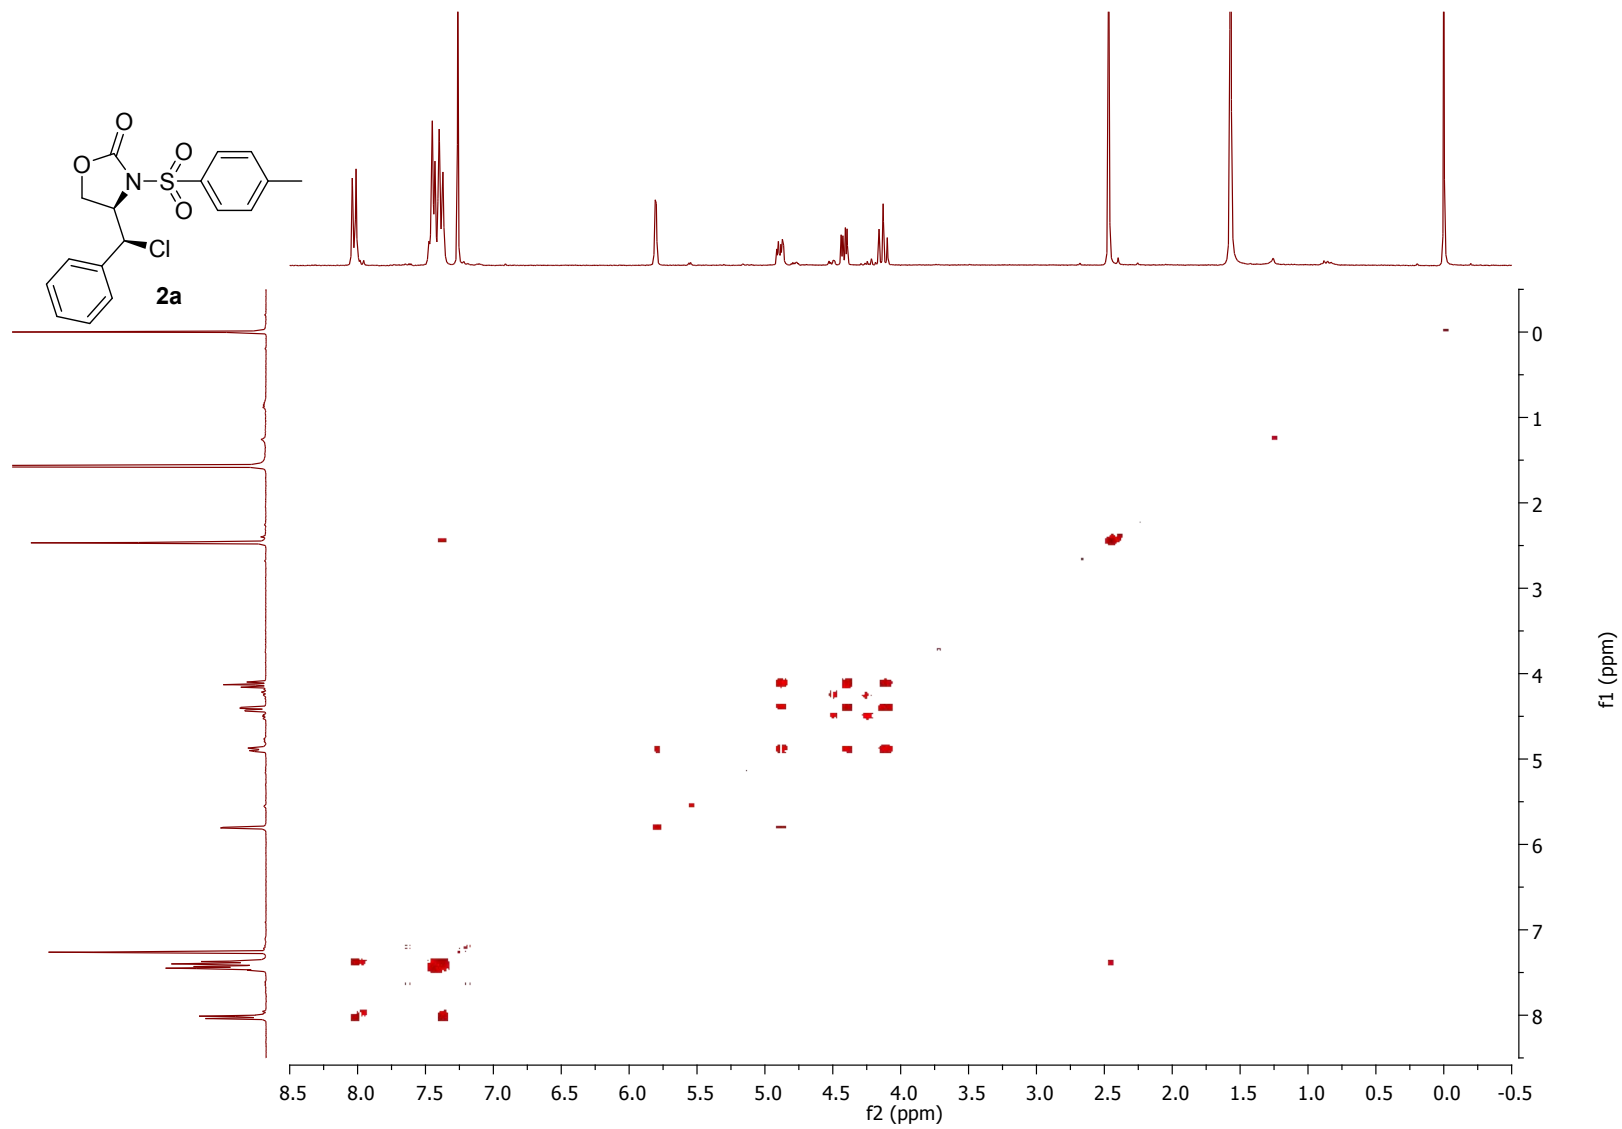



NOESY of substrate **2a**

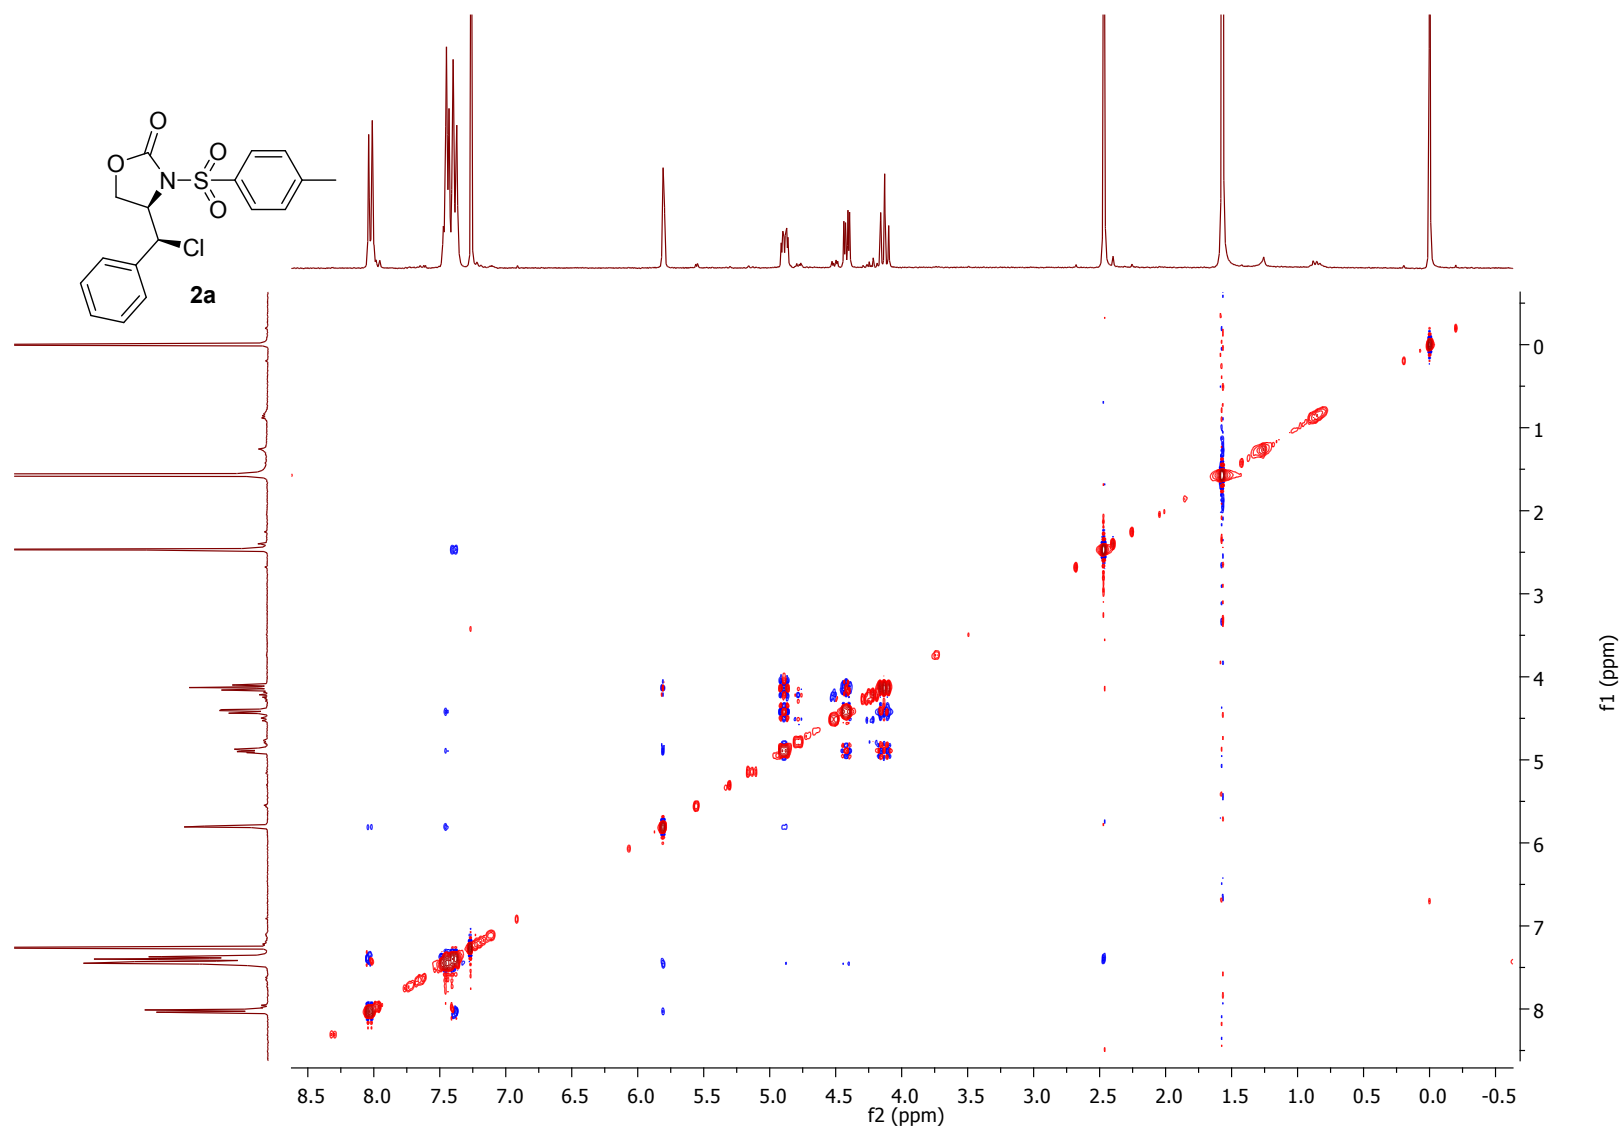

HSQC of substrate **2a**

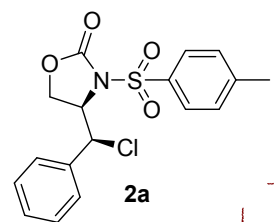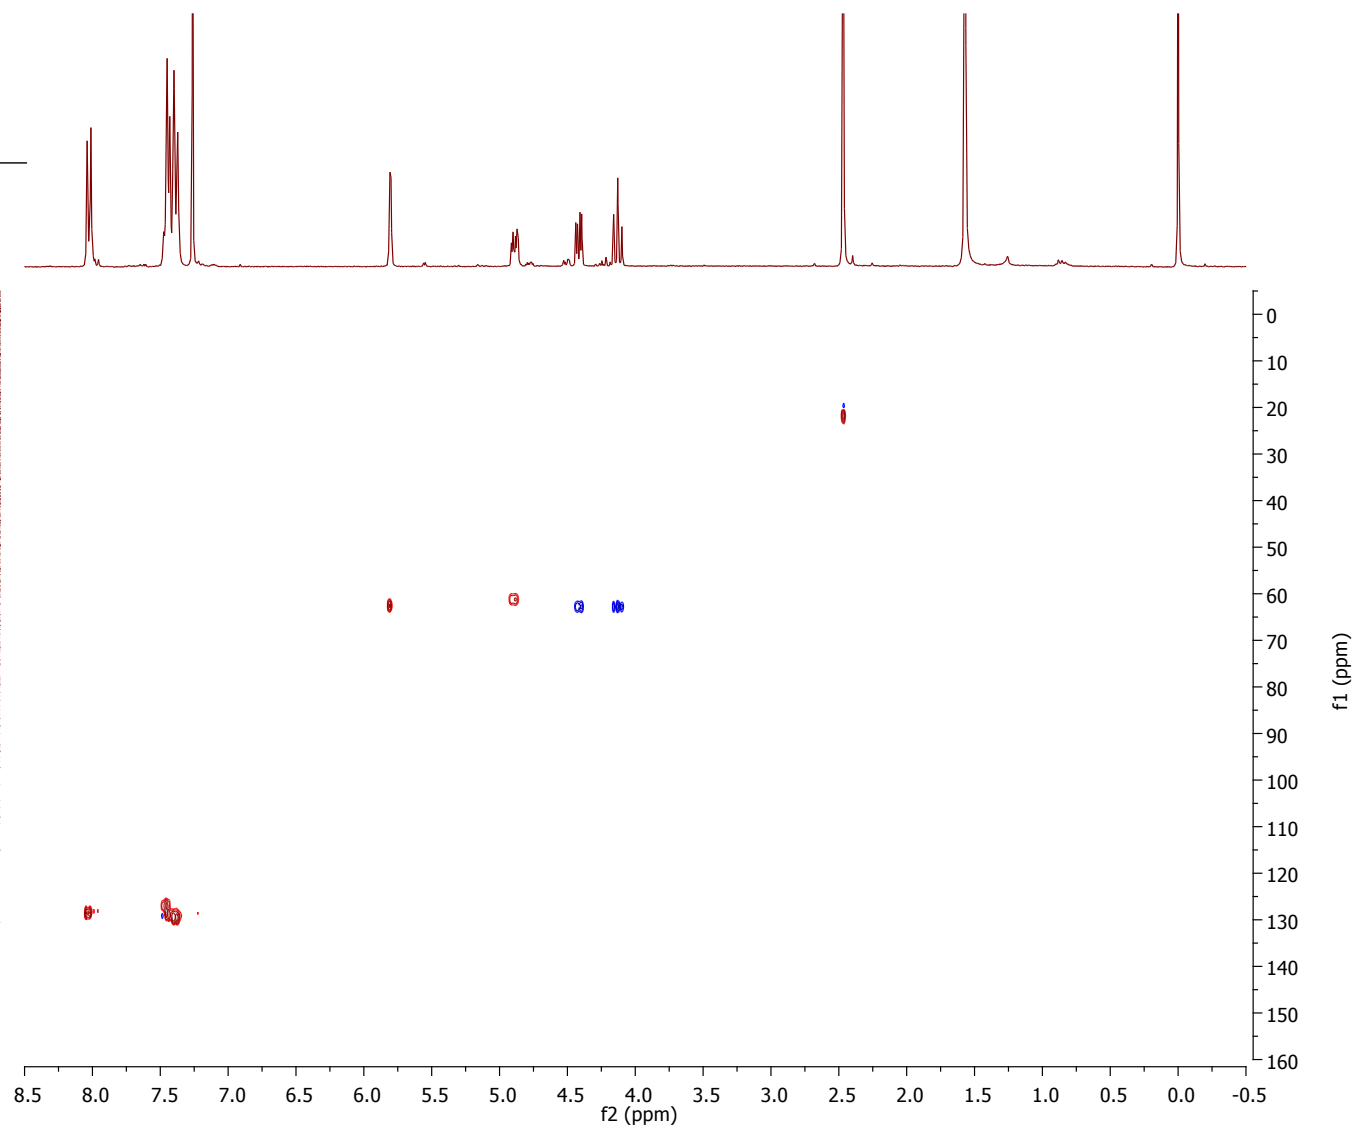

HMBC of substrate **2a**

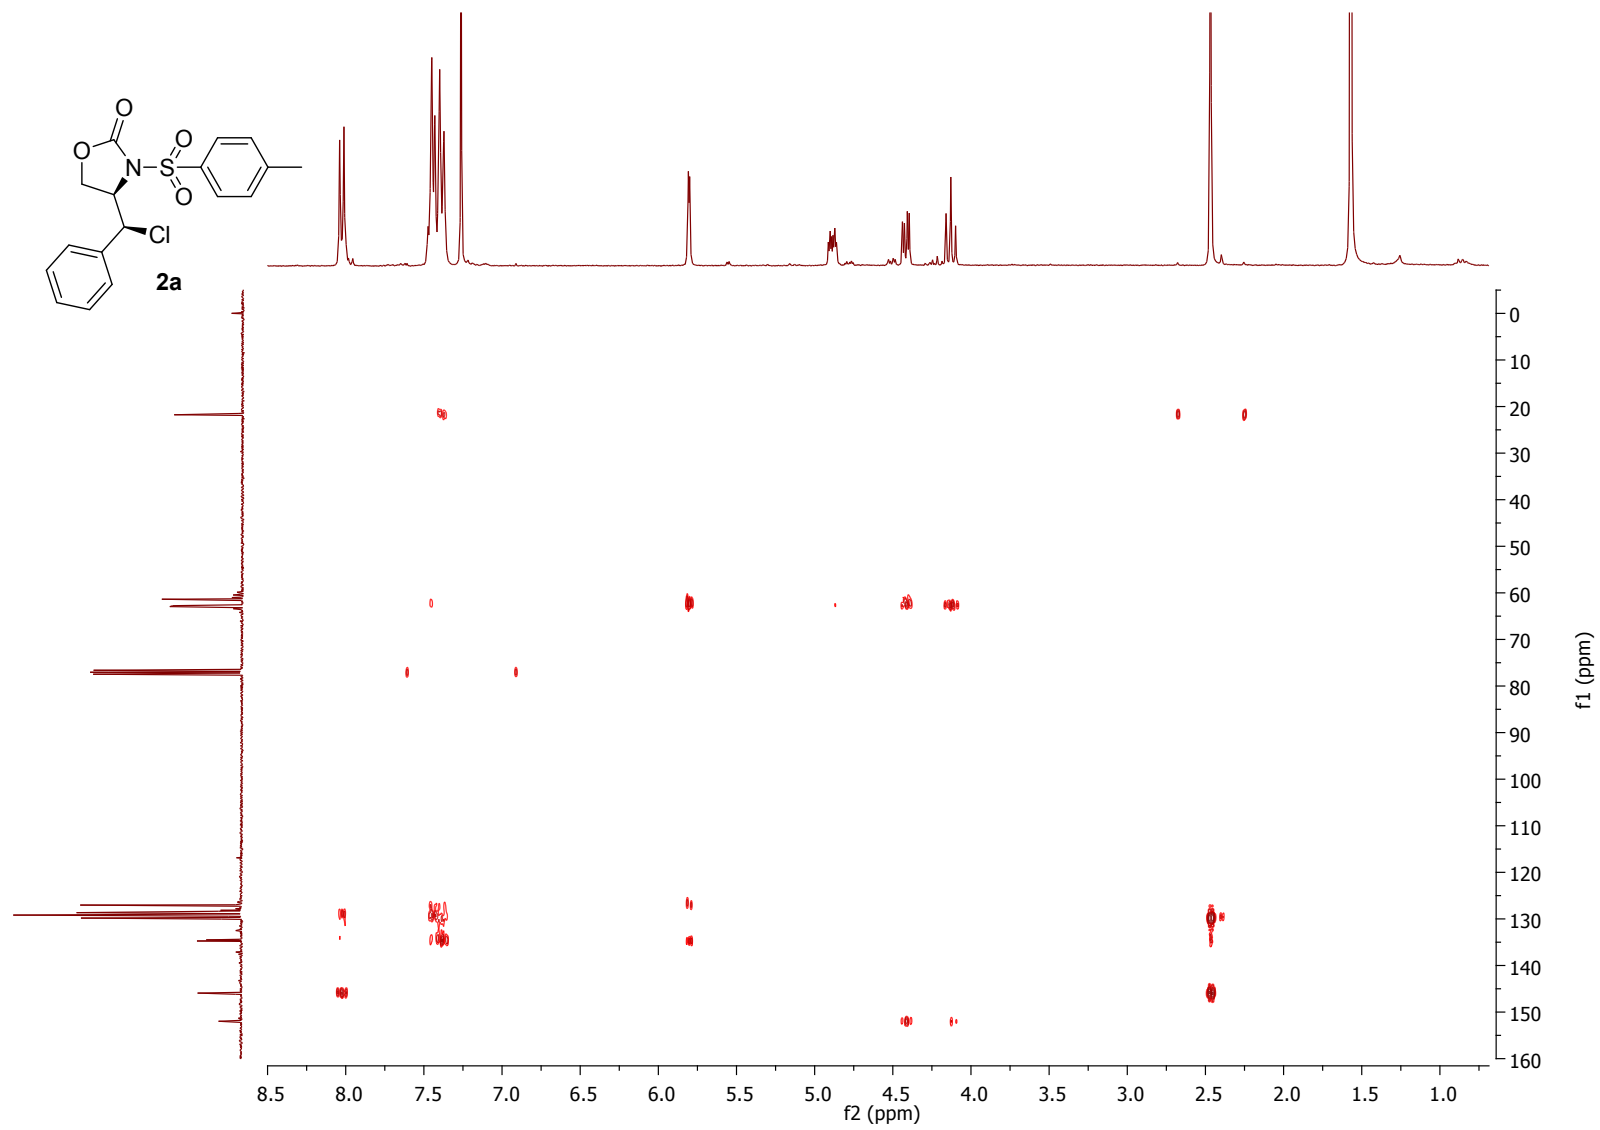

$^1\text{H}$  NMR (300 MHz,  $\text{CDCl}_3$ ) of substrate **3a**

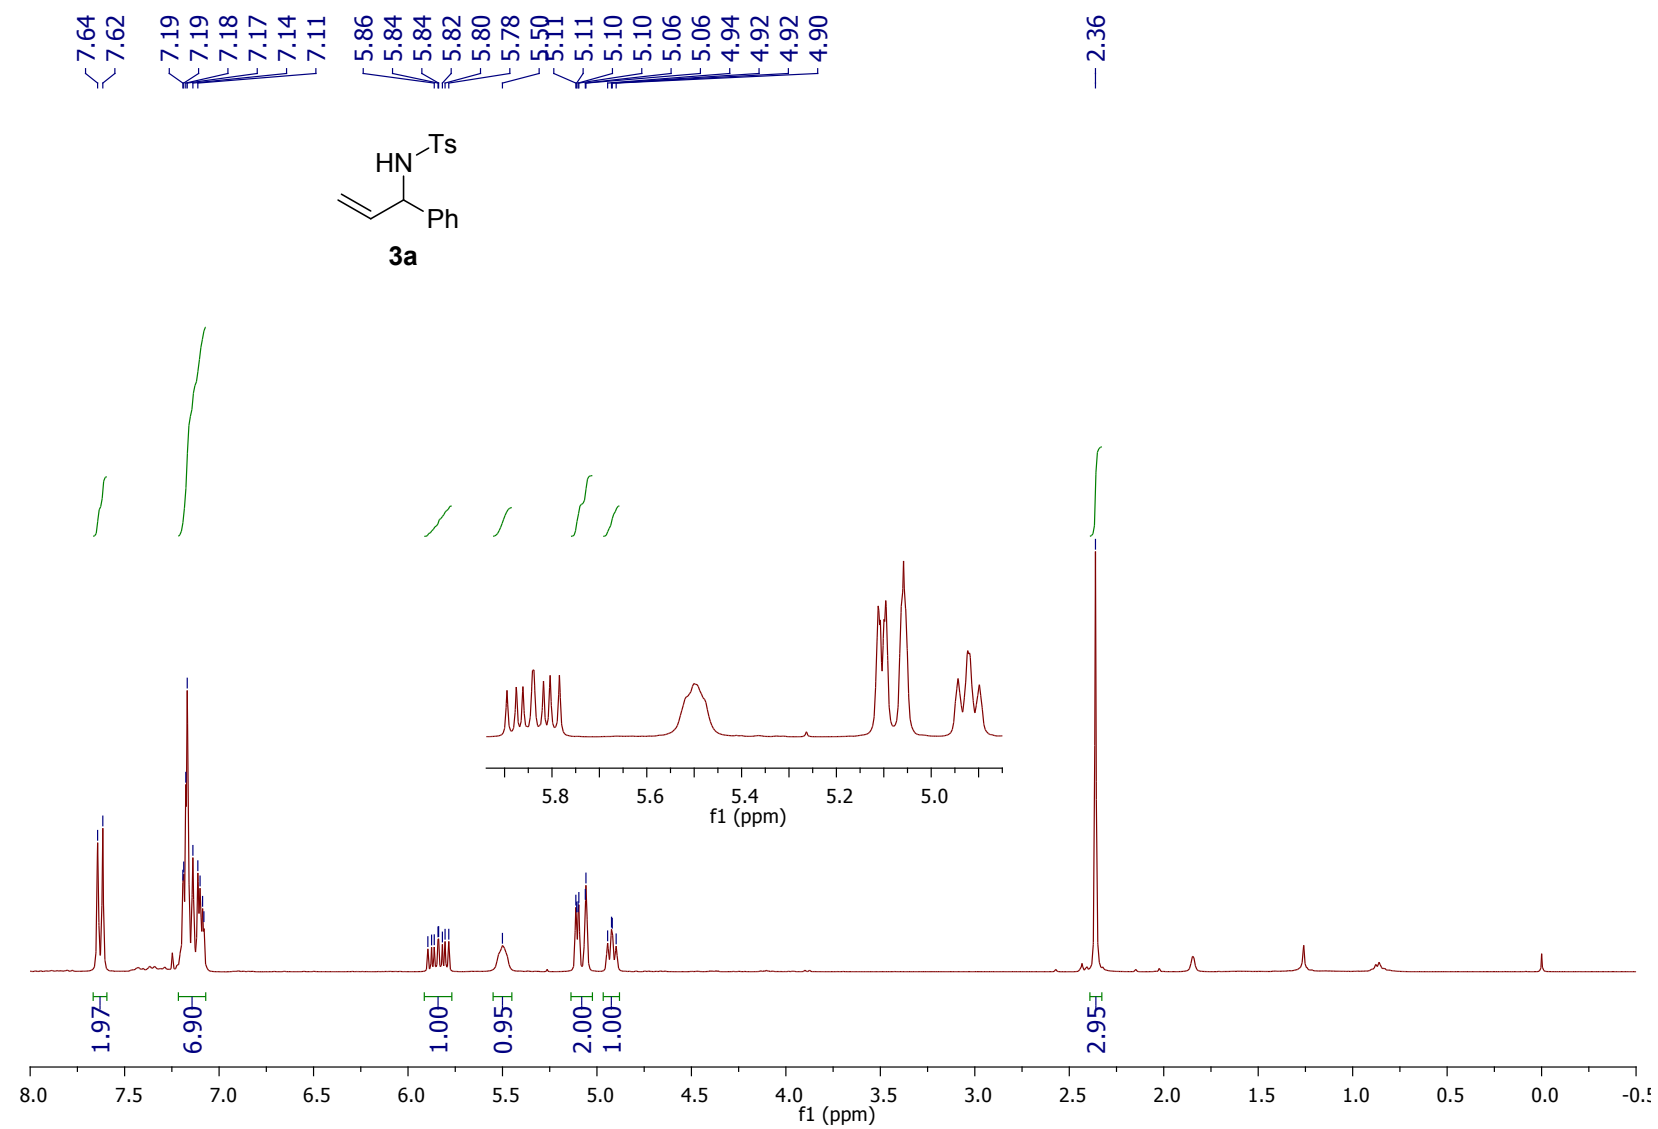

$^{13}\text{C}$  NMR (75 MHz,  $\text{CDCl}_3$ ) of substrate **3a**

143.19  
139.51  
137.72  
137.18  
129.43  
128.60  
127.68  
127.24  
127.14  
— 116.73

— 59.95

— 21.53

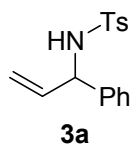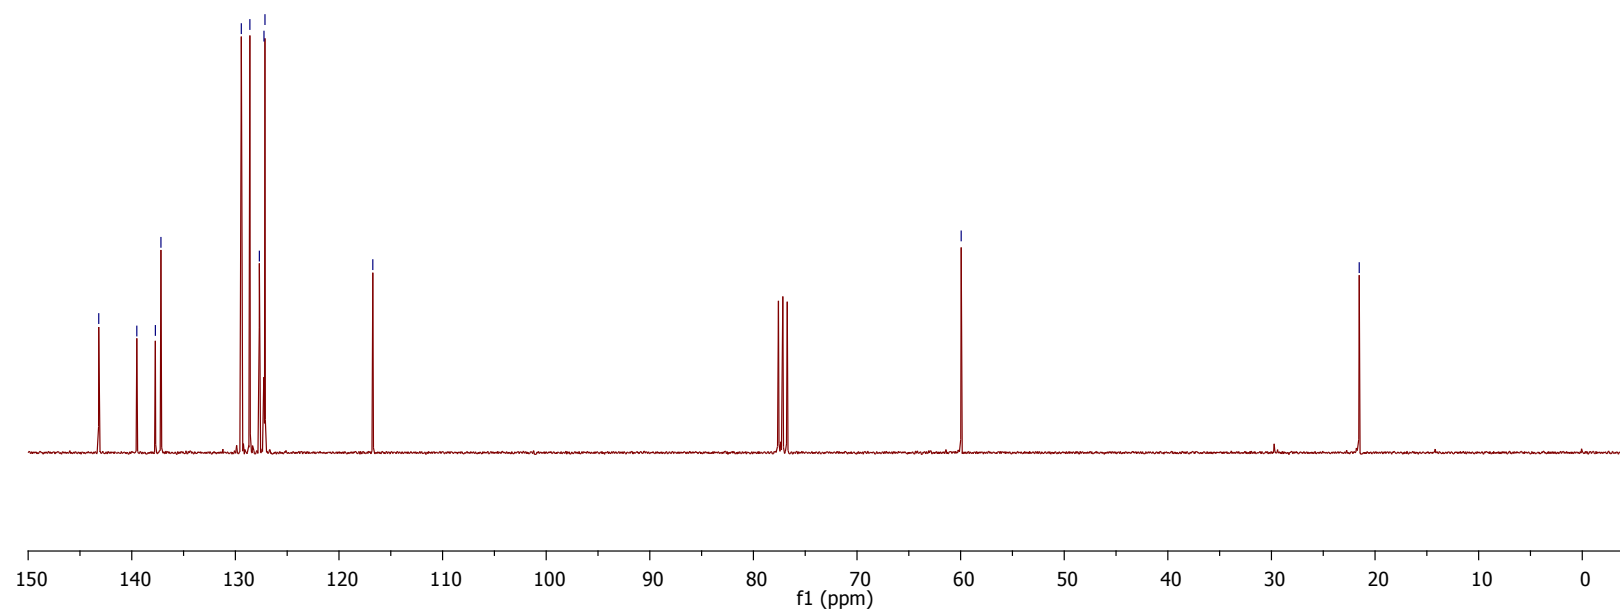

<sup>1</sup>H NMR (300 MHz, CDCl<sub>3</sub>) of substrate **2b**

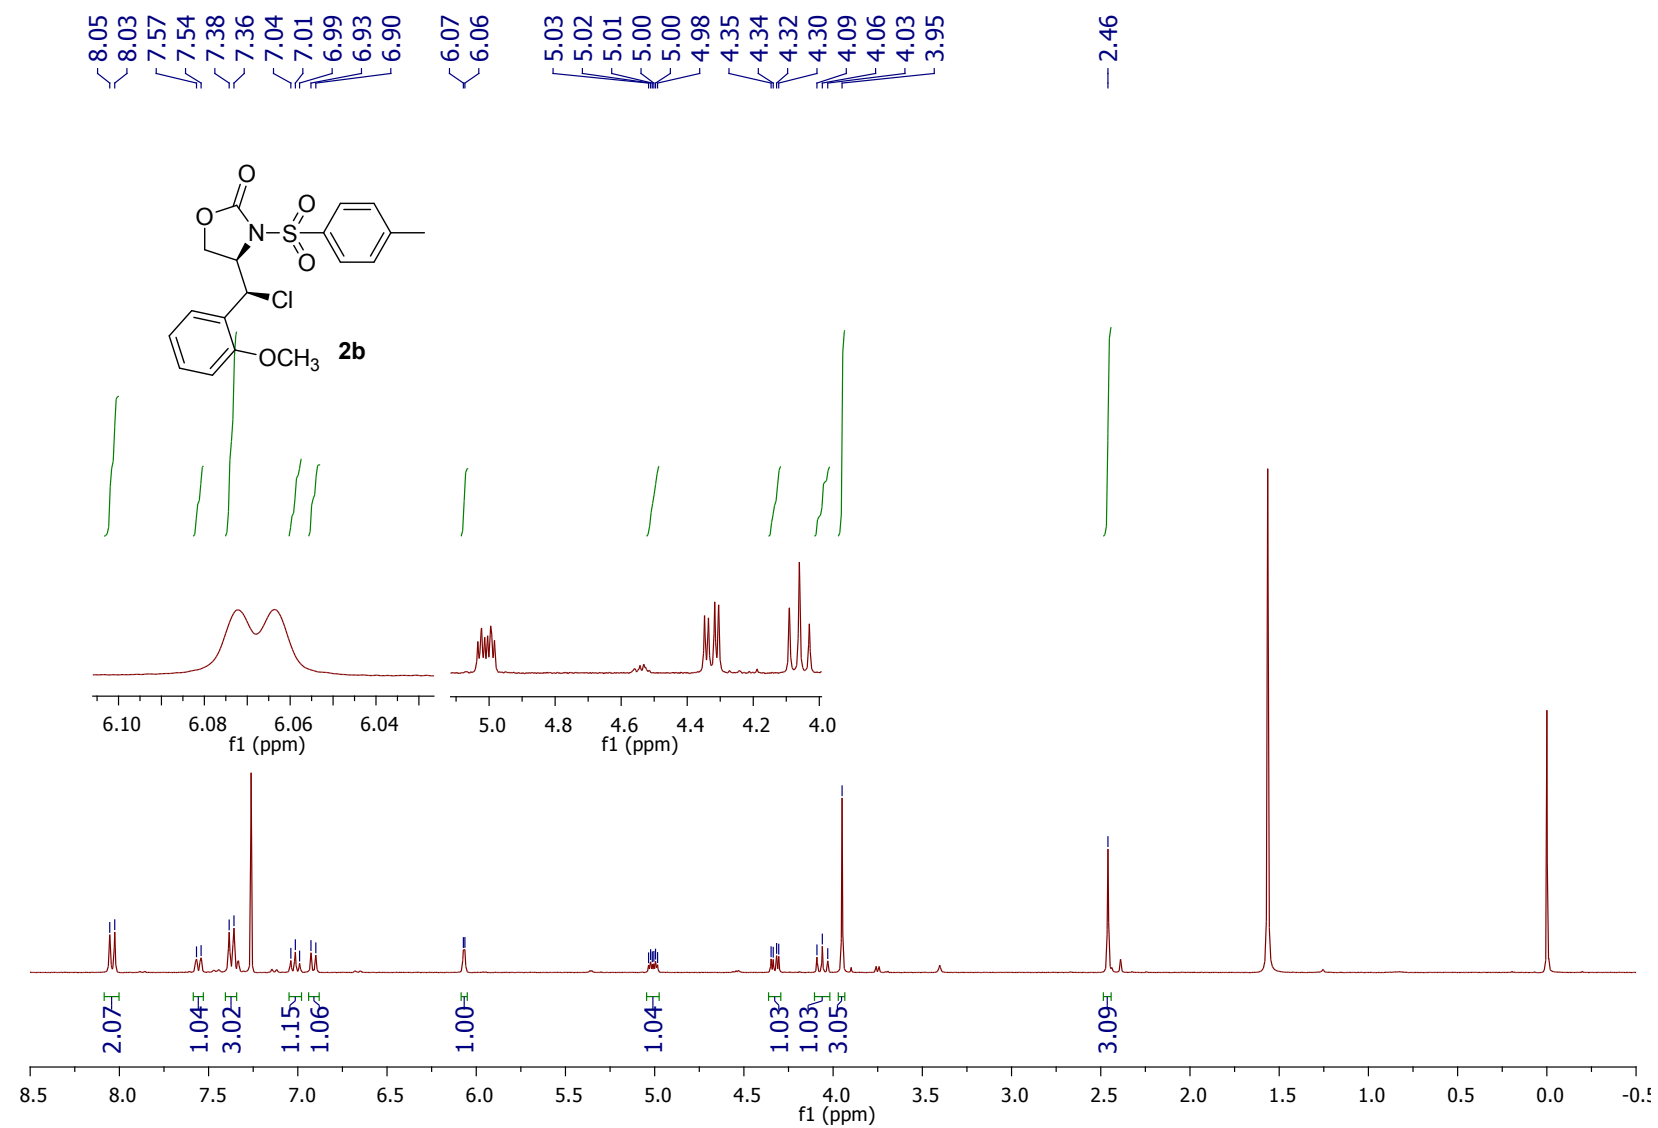

<sup>13</sup>C NMR (75 MHz, CDCl<sub>3</sub>) of substrate **2b**

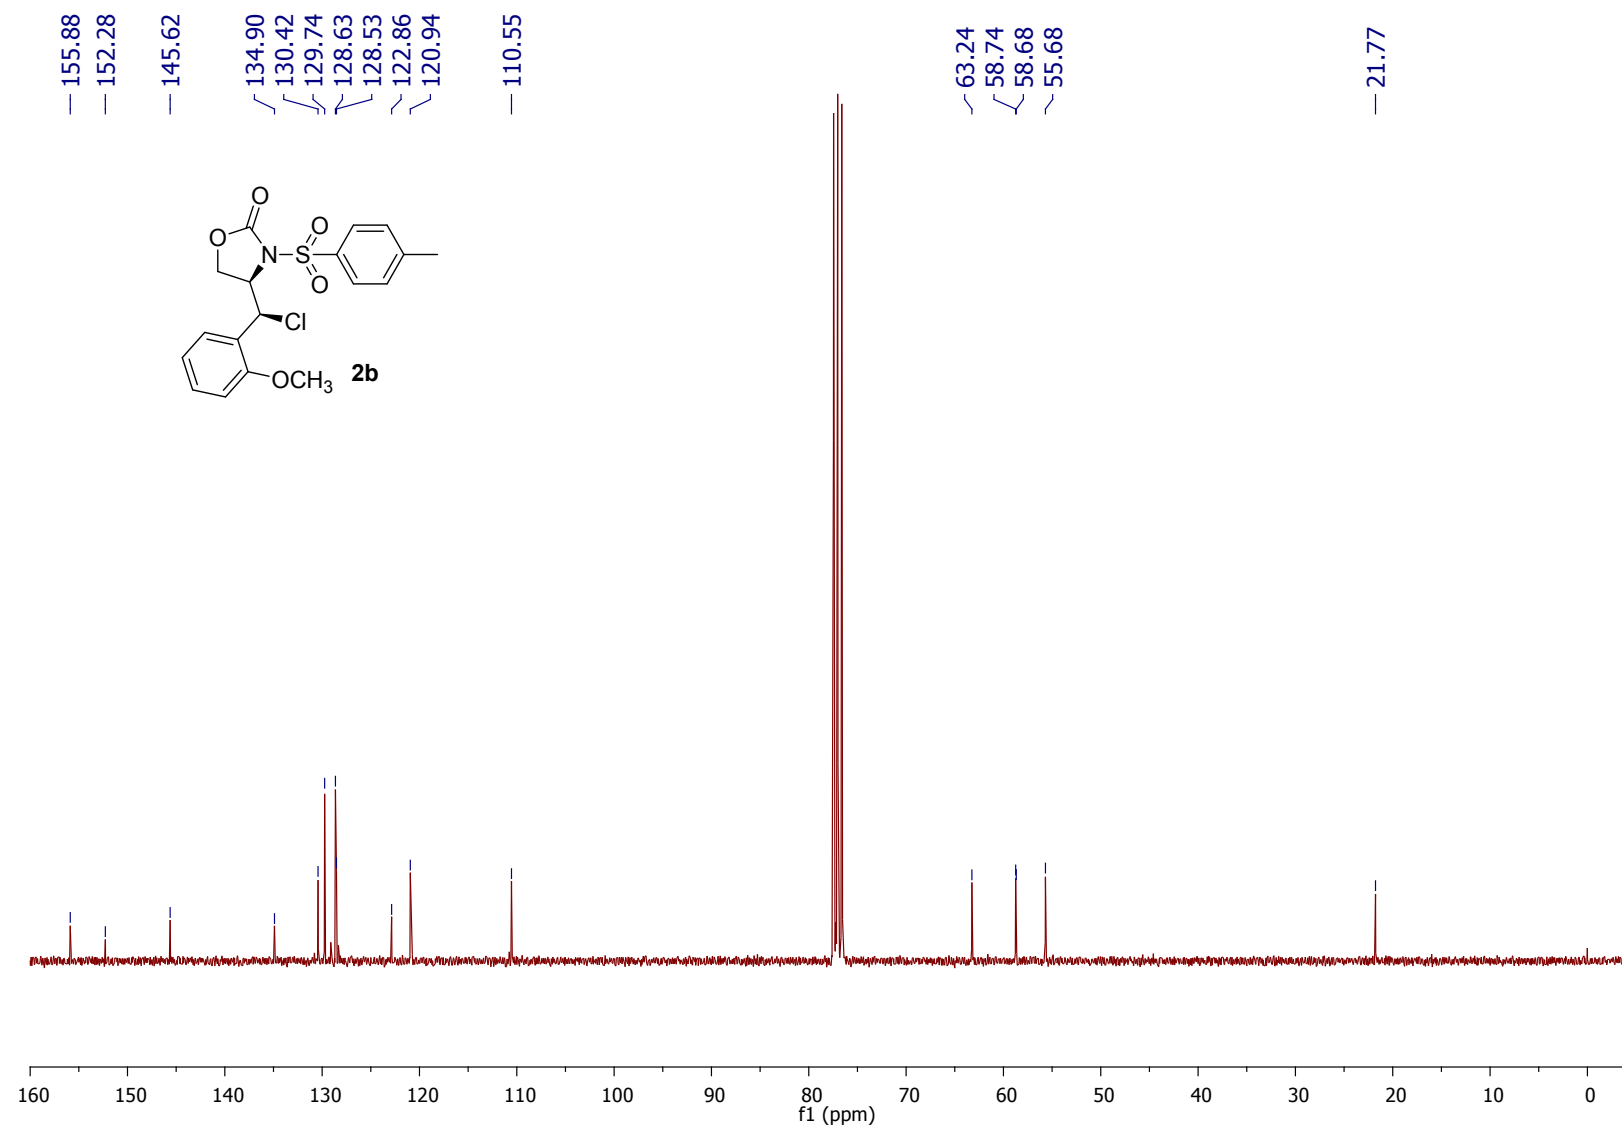

COSY of substrate **2b**

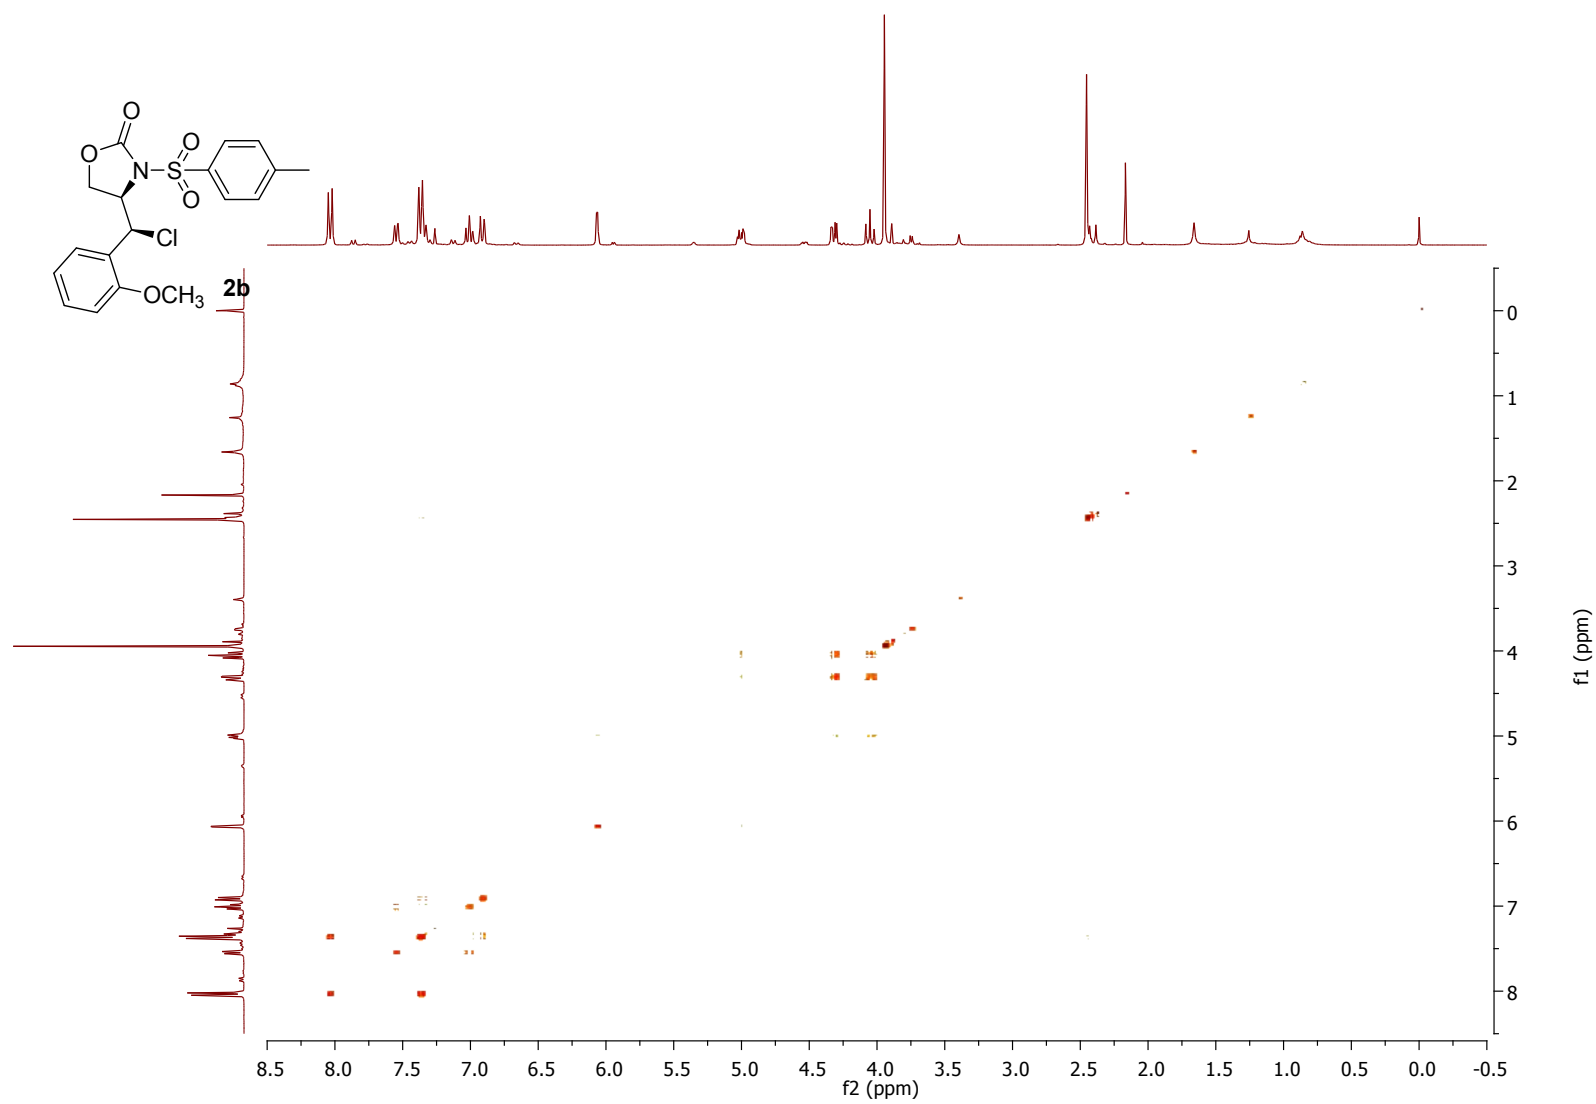



HSQC of substrate **2b**

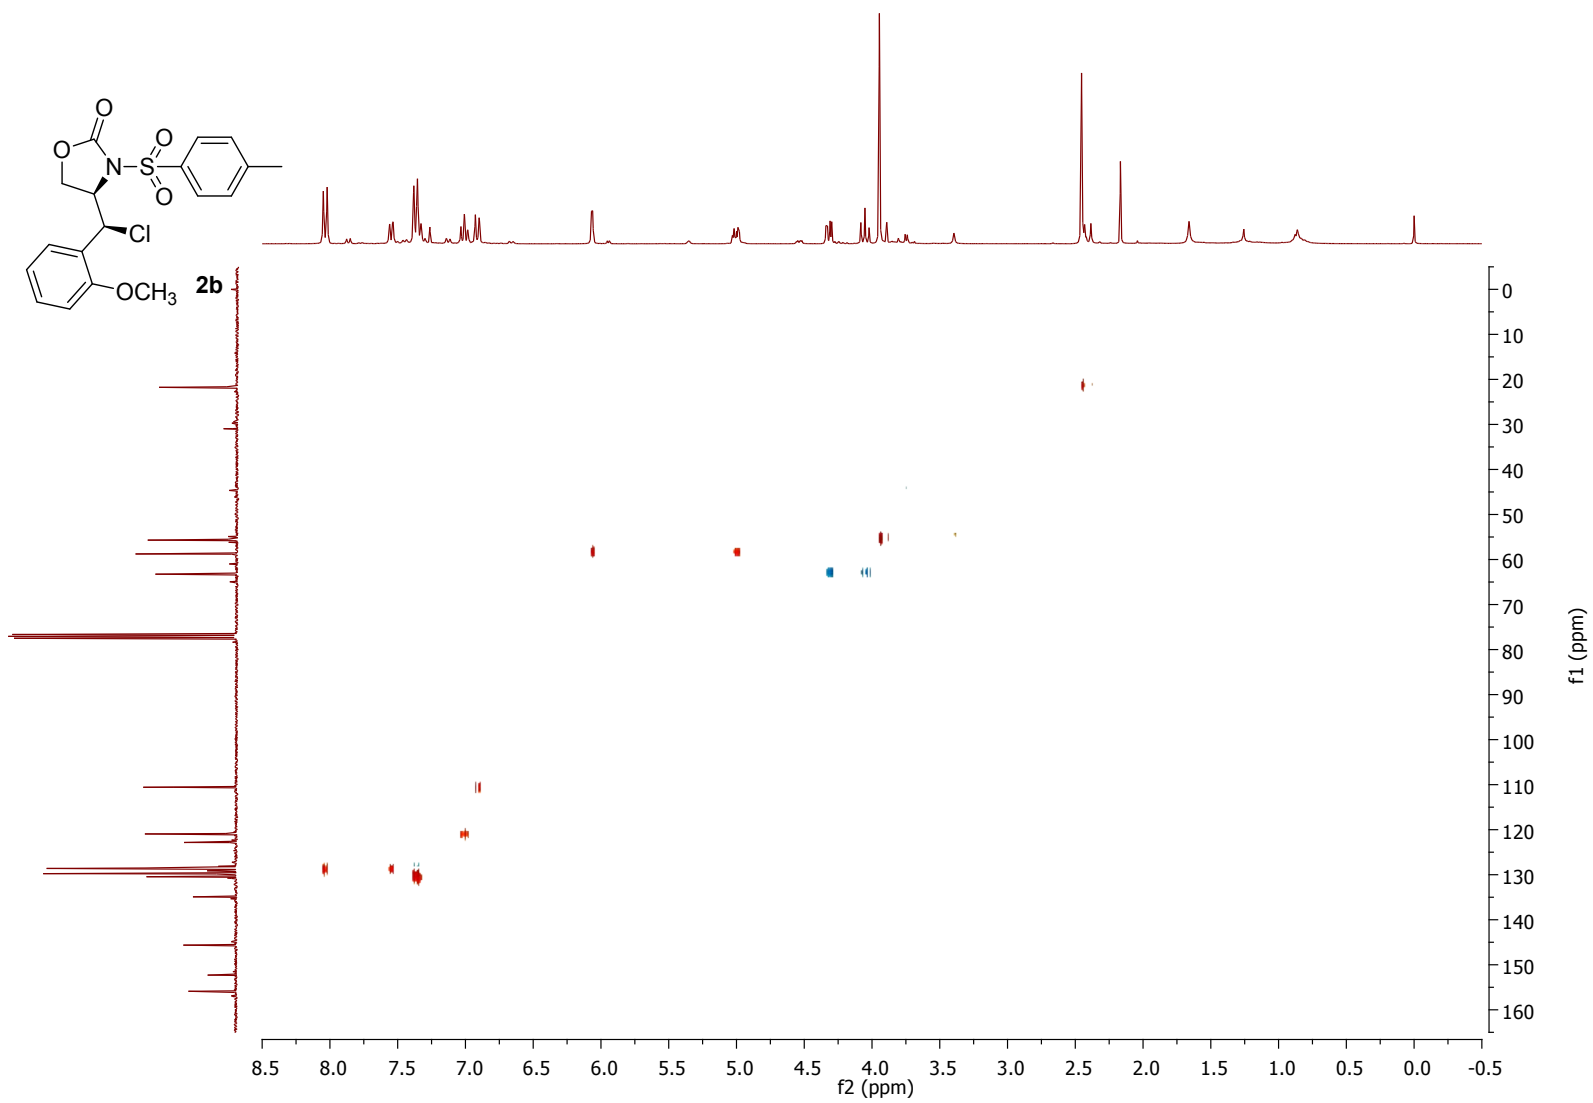

<sup>1</sup>H NMR (300 MHz, CDCl<sub>3</sub>) of substrate **2c**

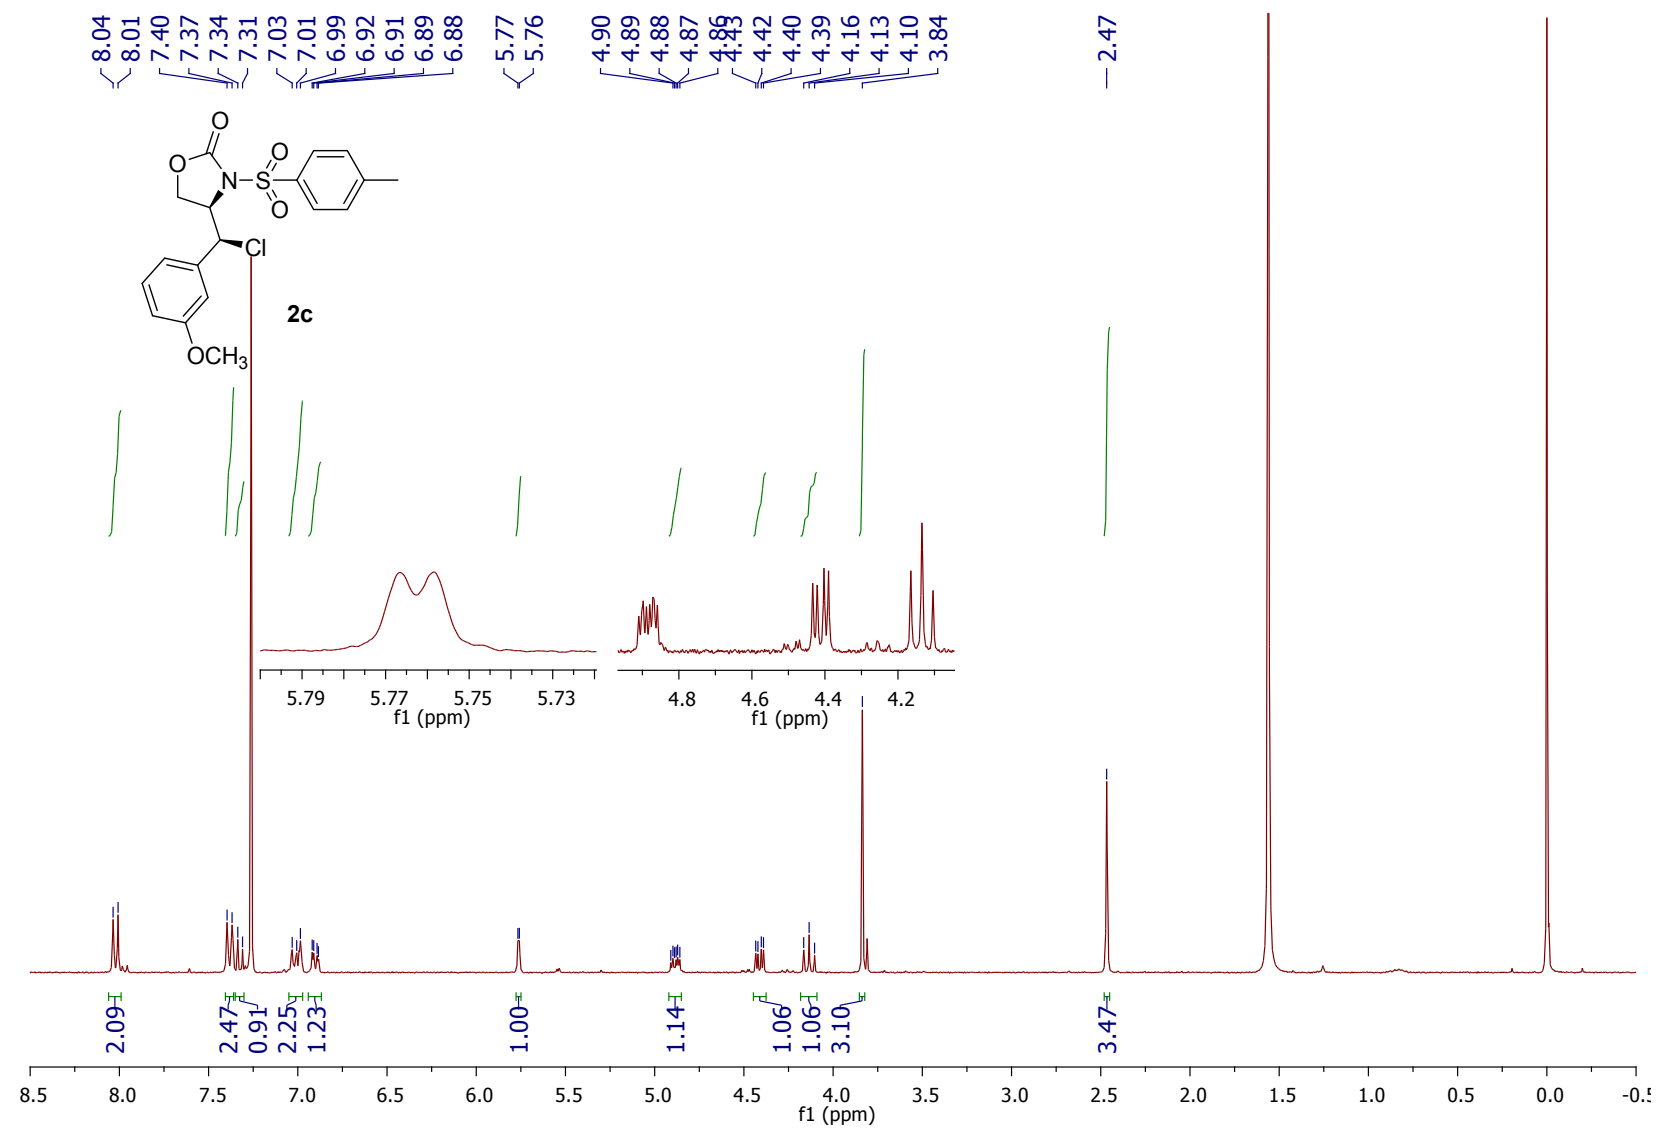

<sup>13</sup>C NMR (75 MHz, CDCl<sub>3</sub>) of substrate **2c**

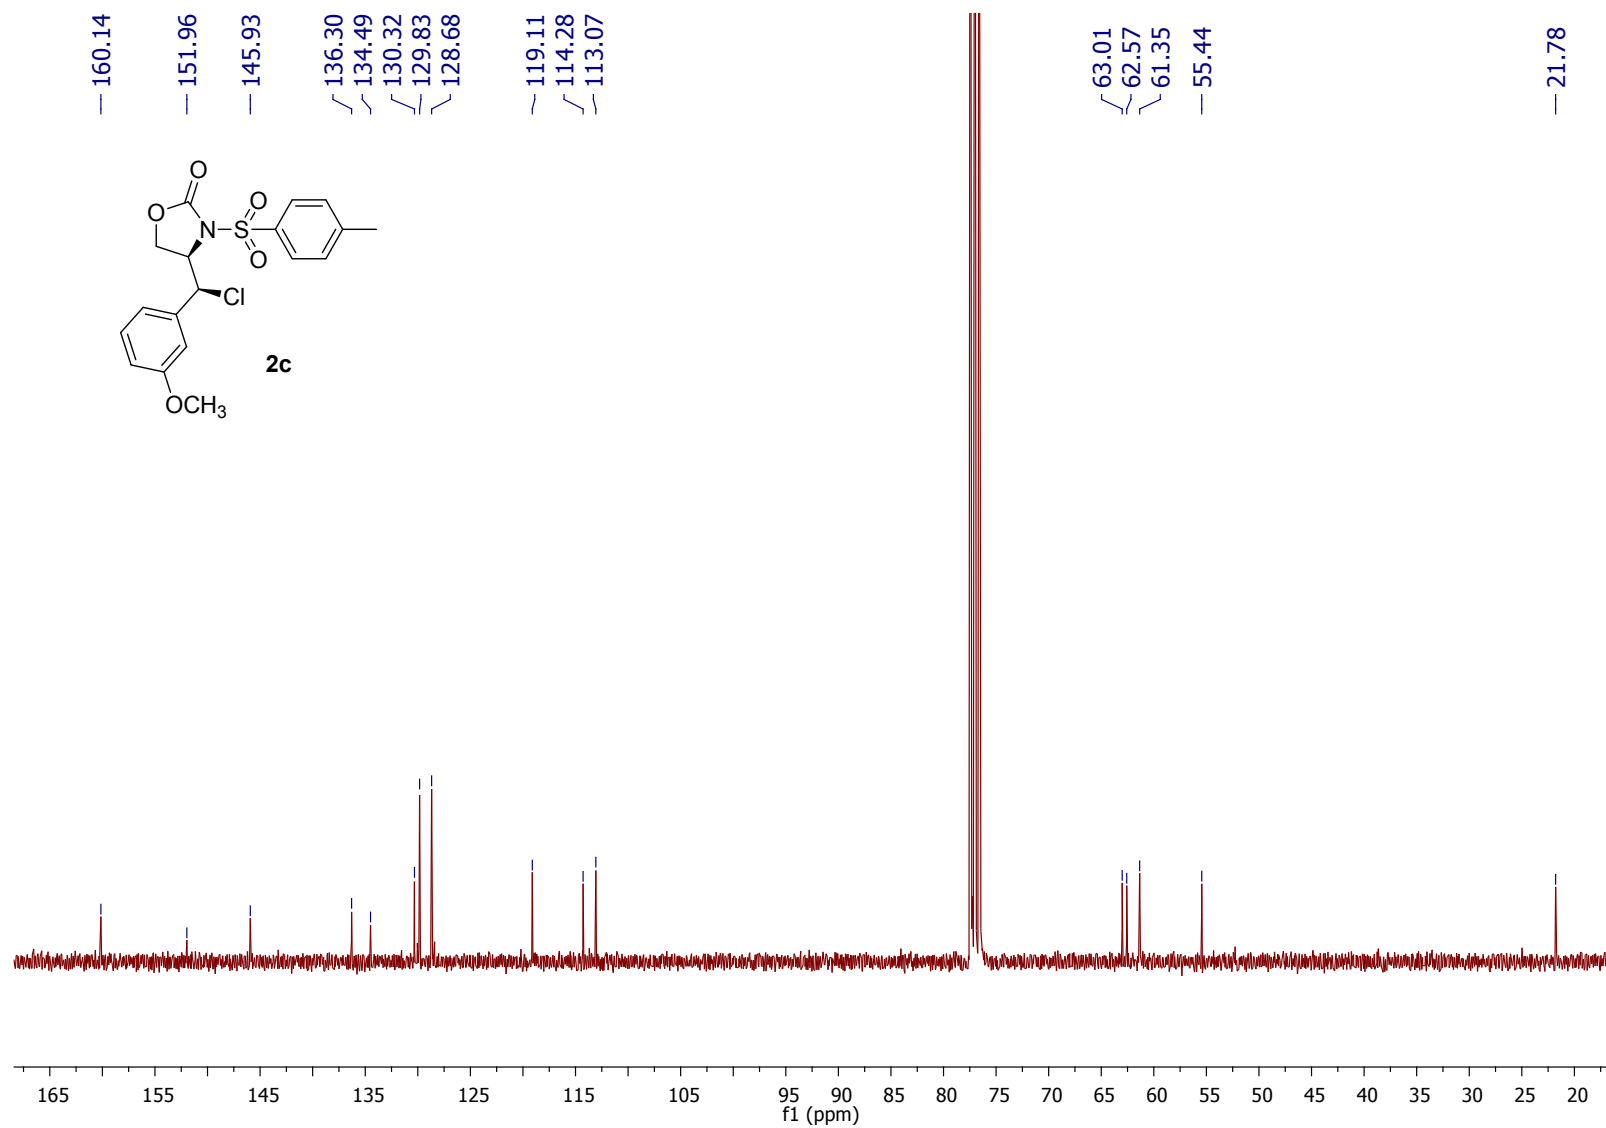

COSY of substrate **2c**

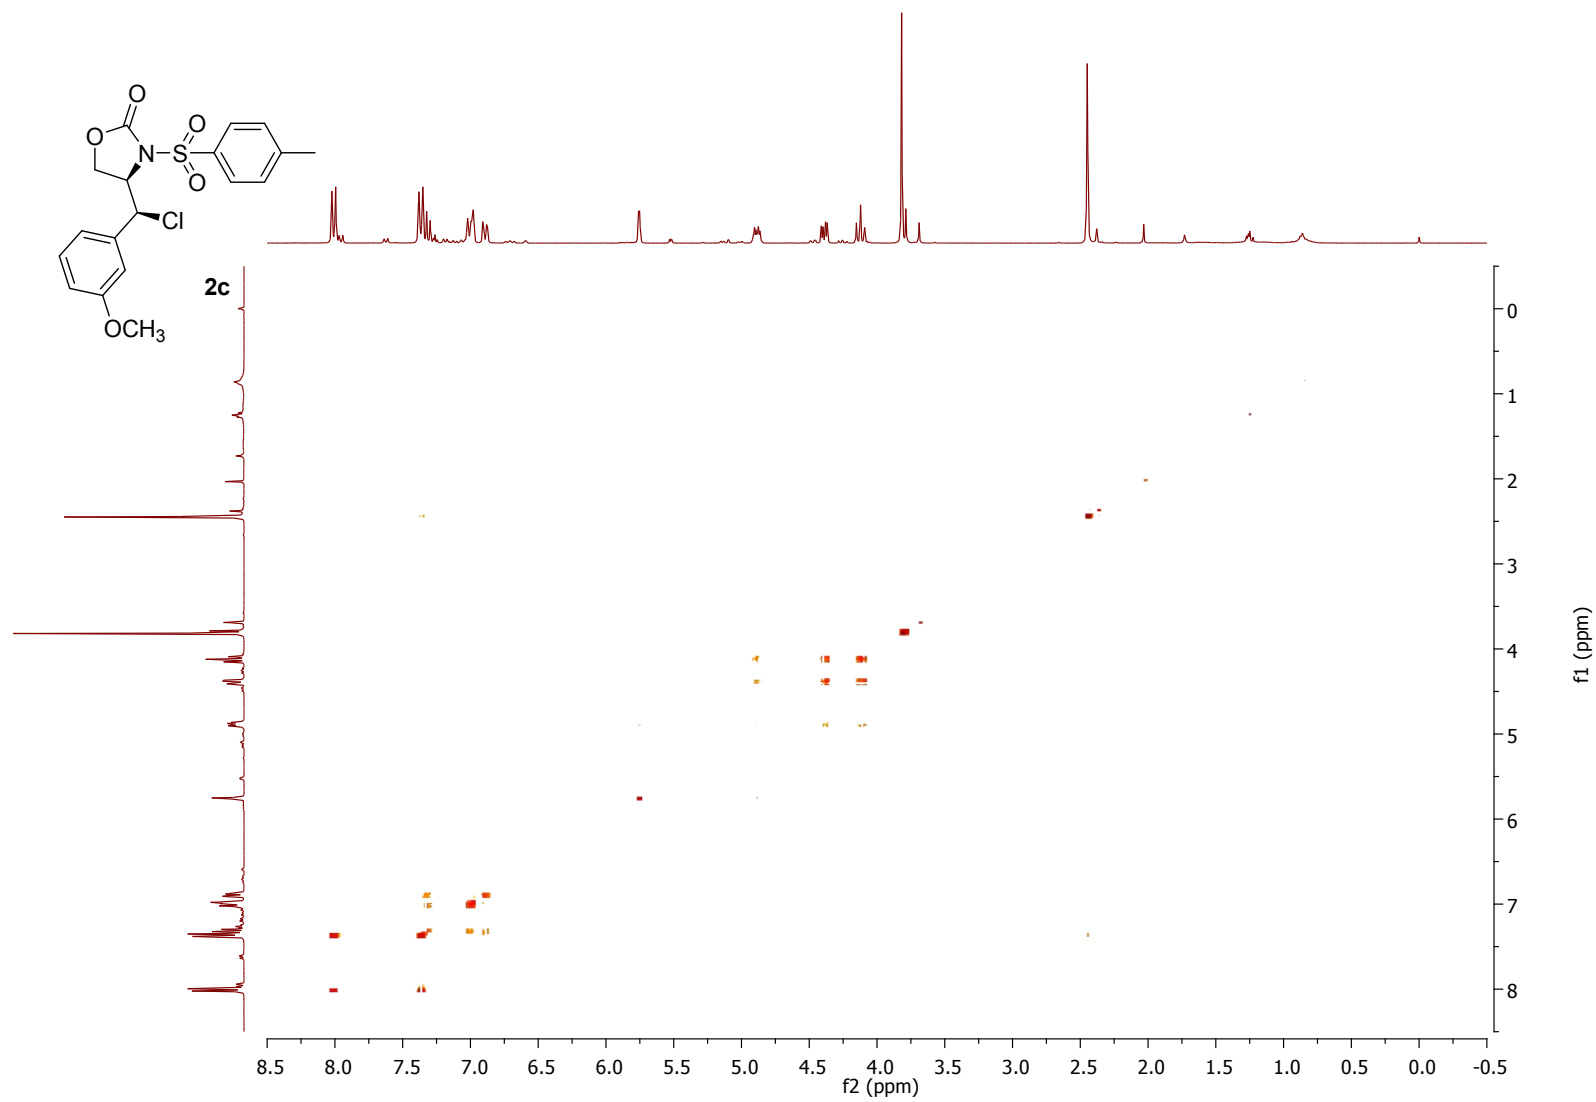

HSQC of substrate **2c**

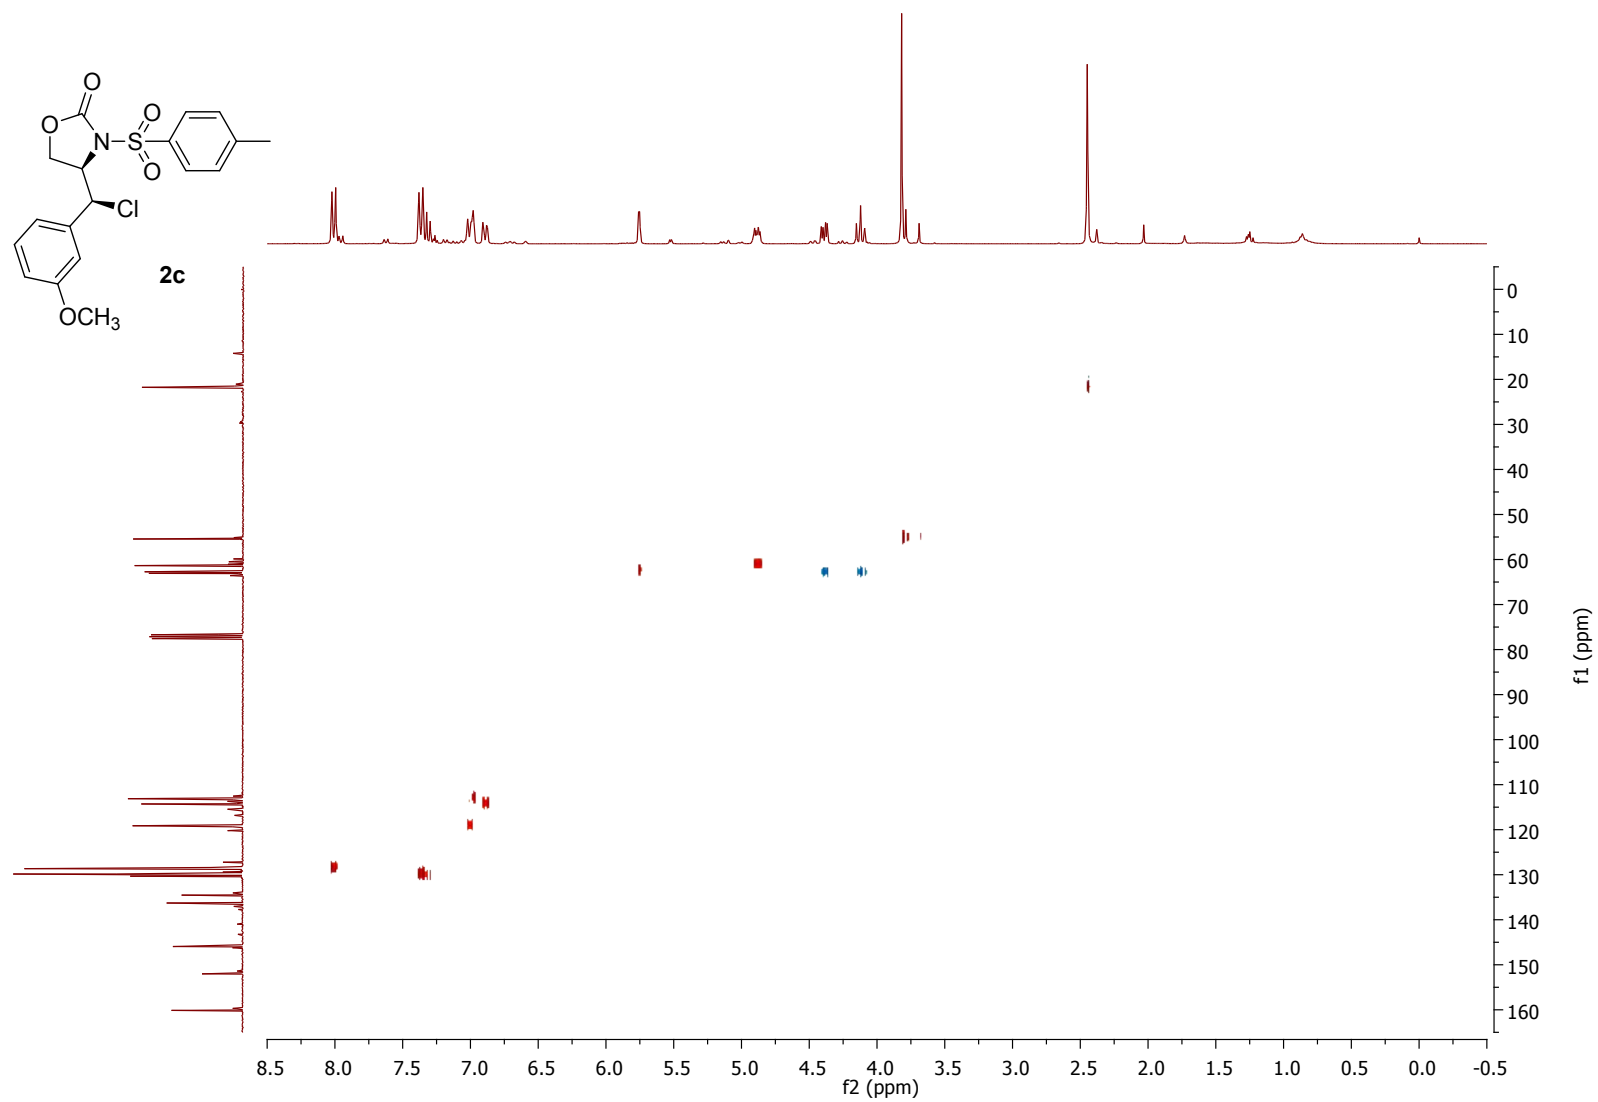

<sup>1</sup>H NMR (300 MHz, CDCl<sub>3</sub>) of substrate **2d**

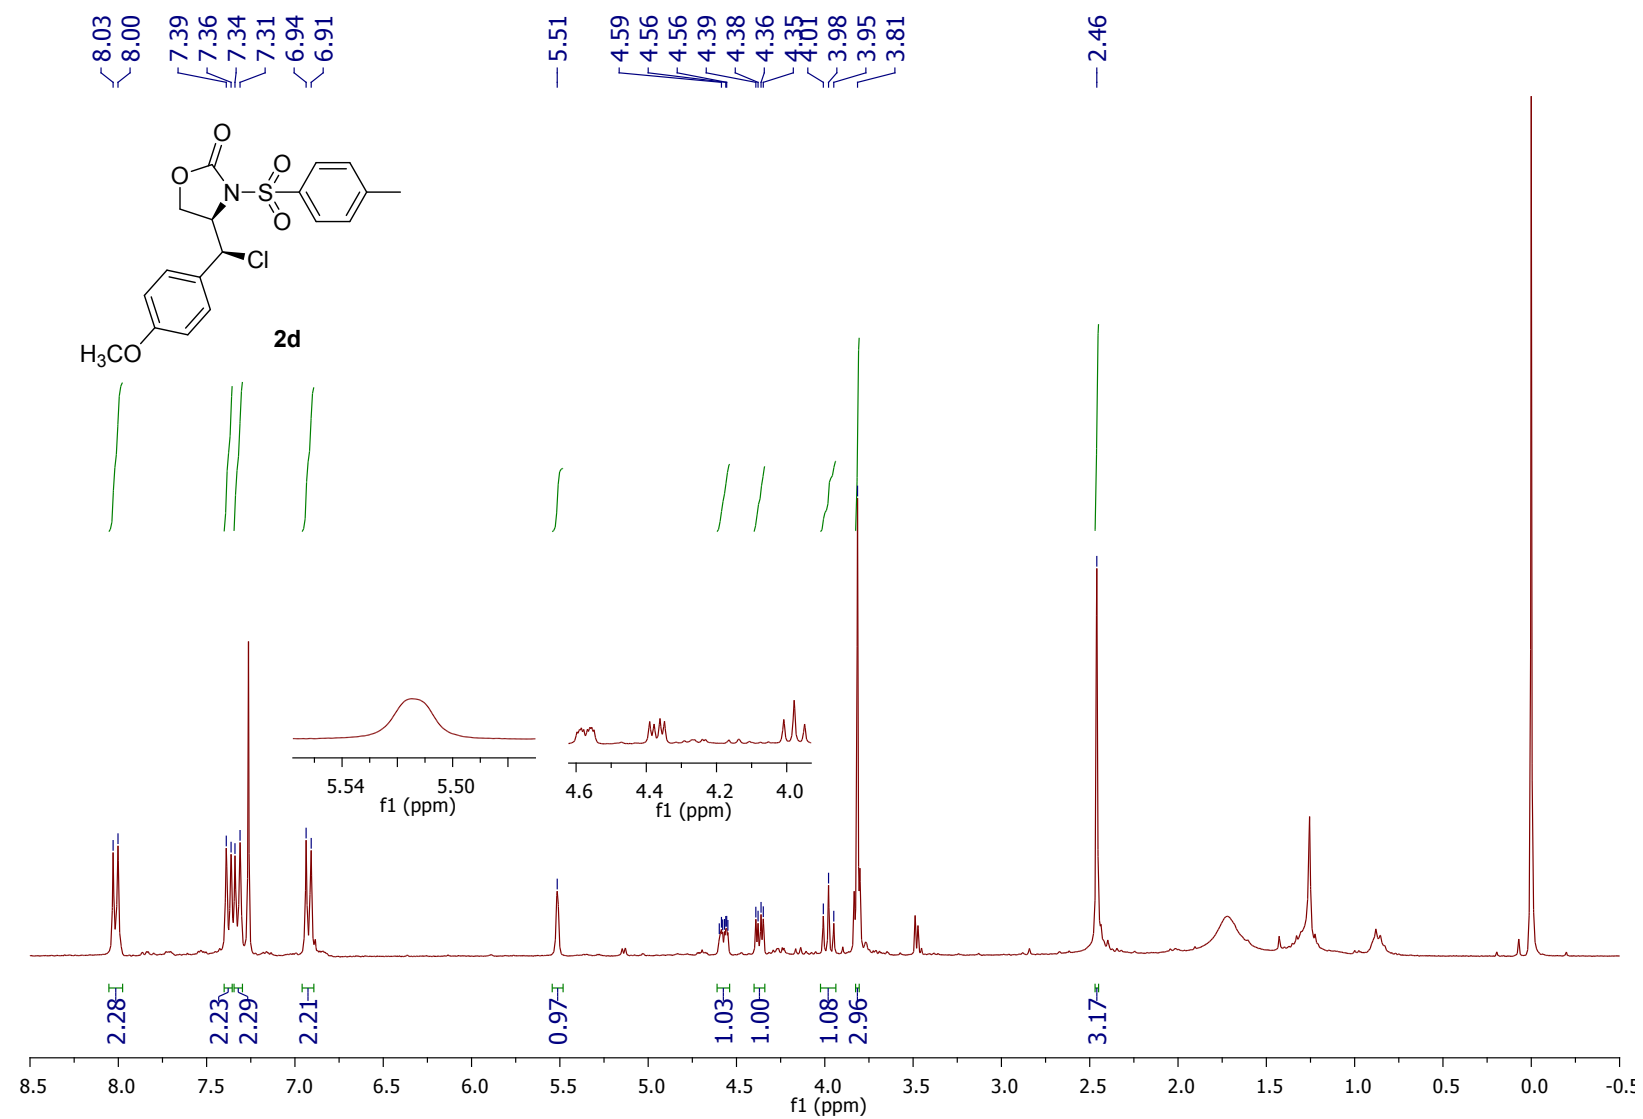

<sup>13</sup>C NMR (75 MHz, CDCl<sub>3</sub>) of substrate **2d**

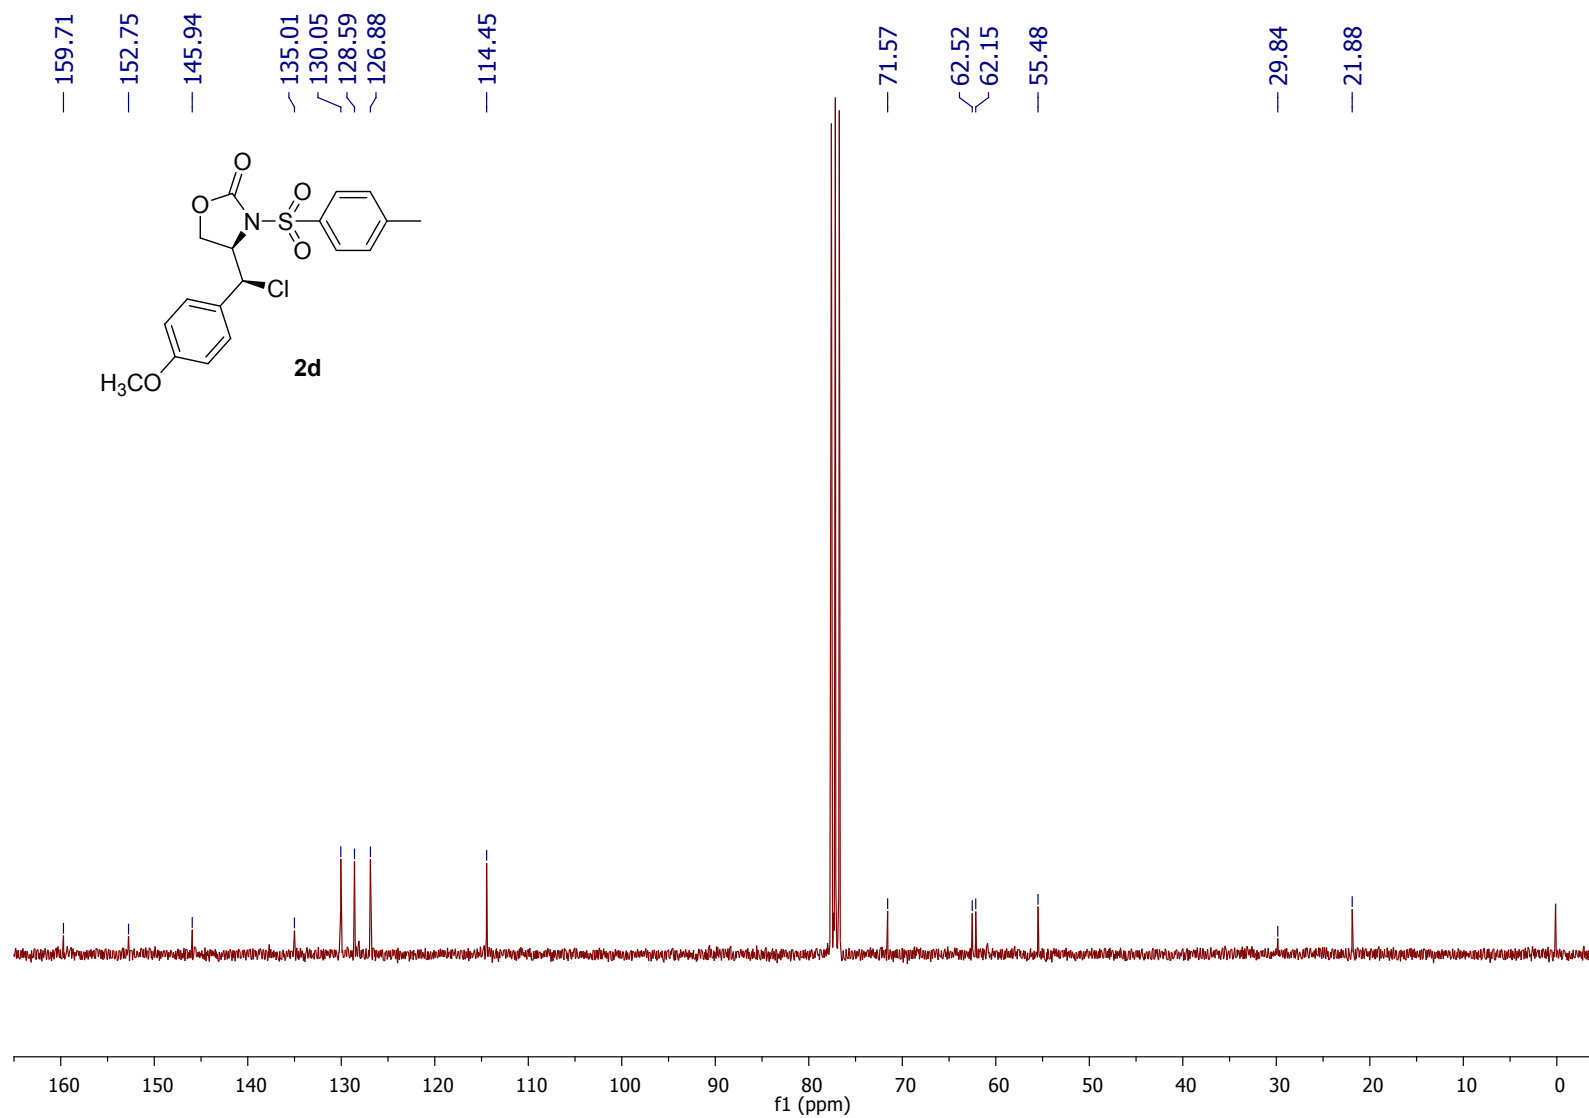

COSY of substrate **2d**

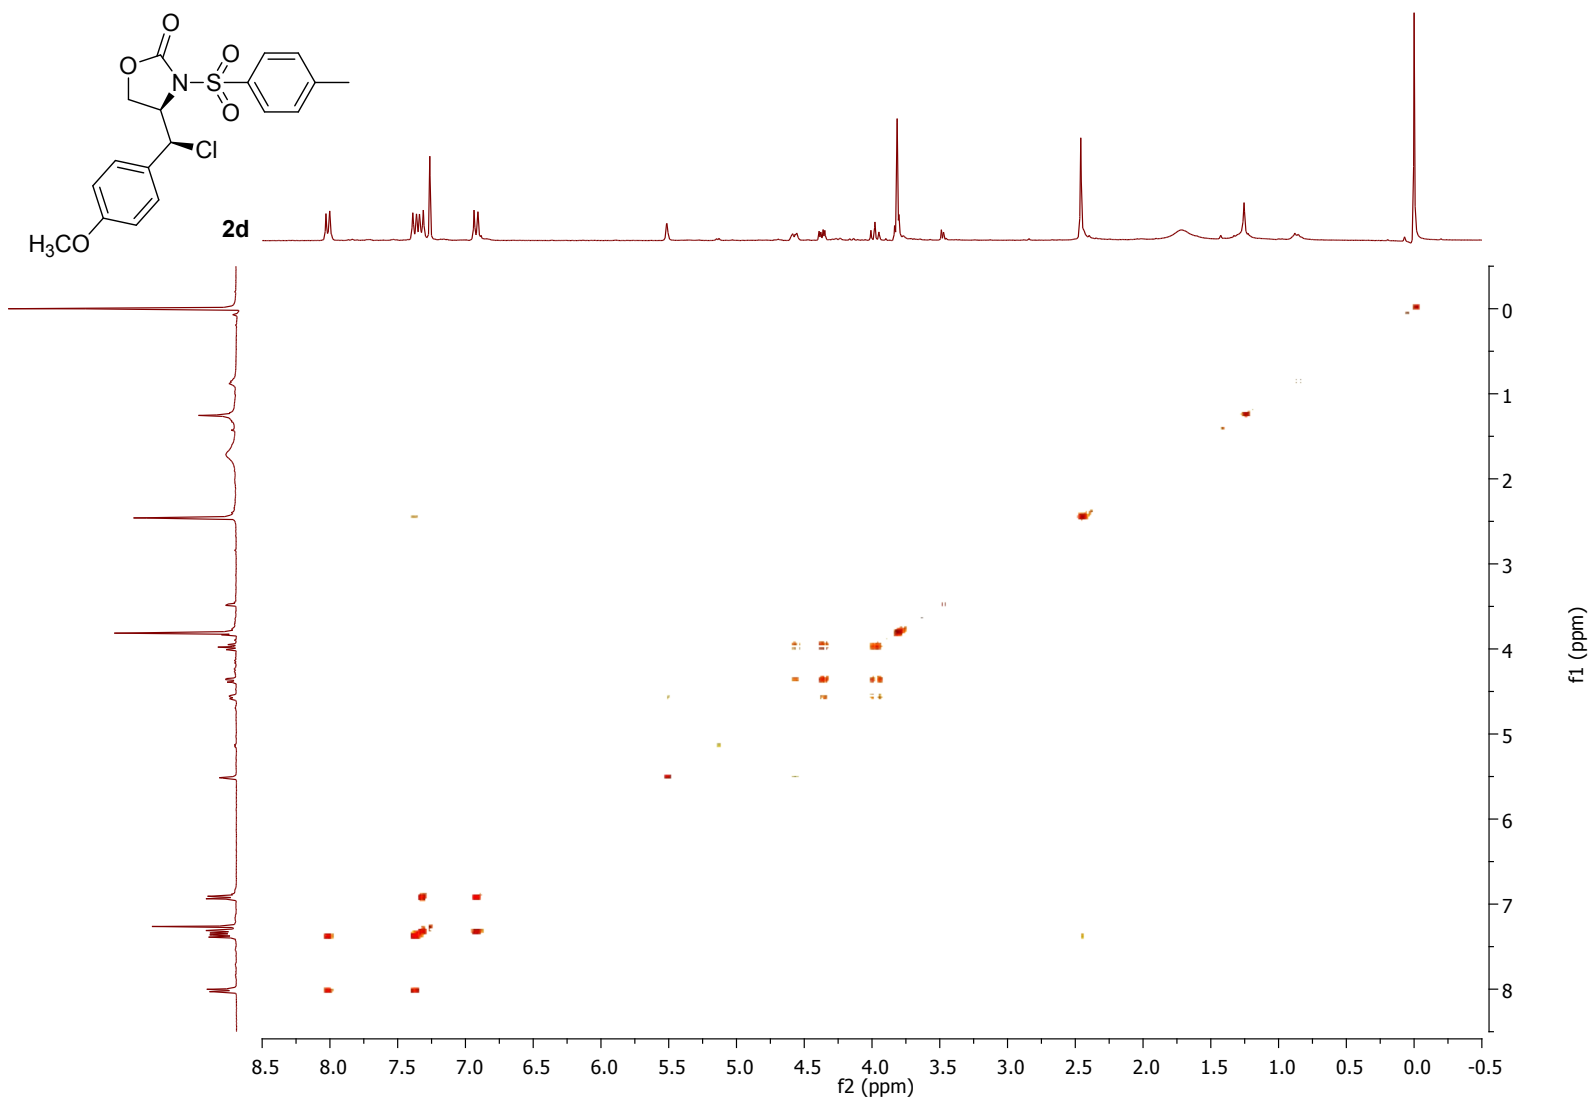



HSQC of substrate **2d**

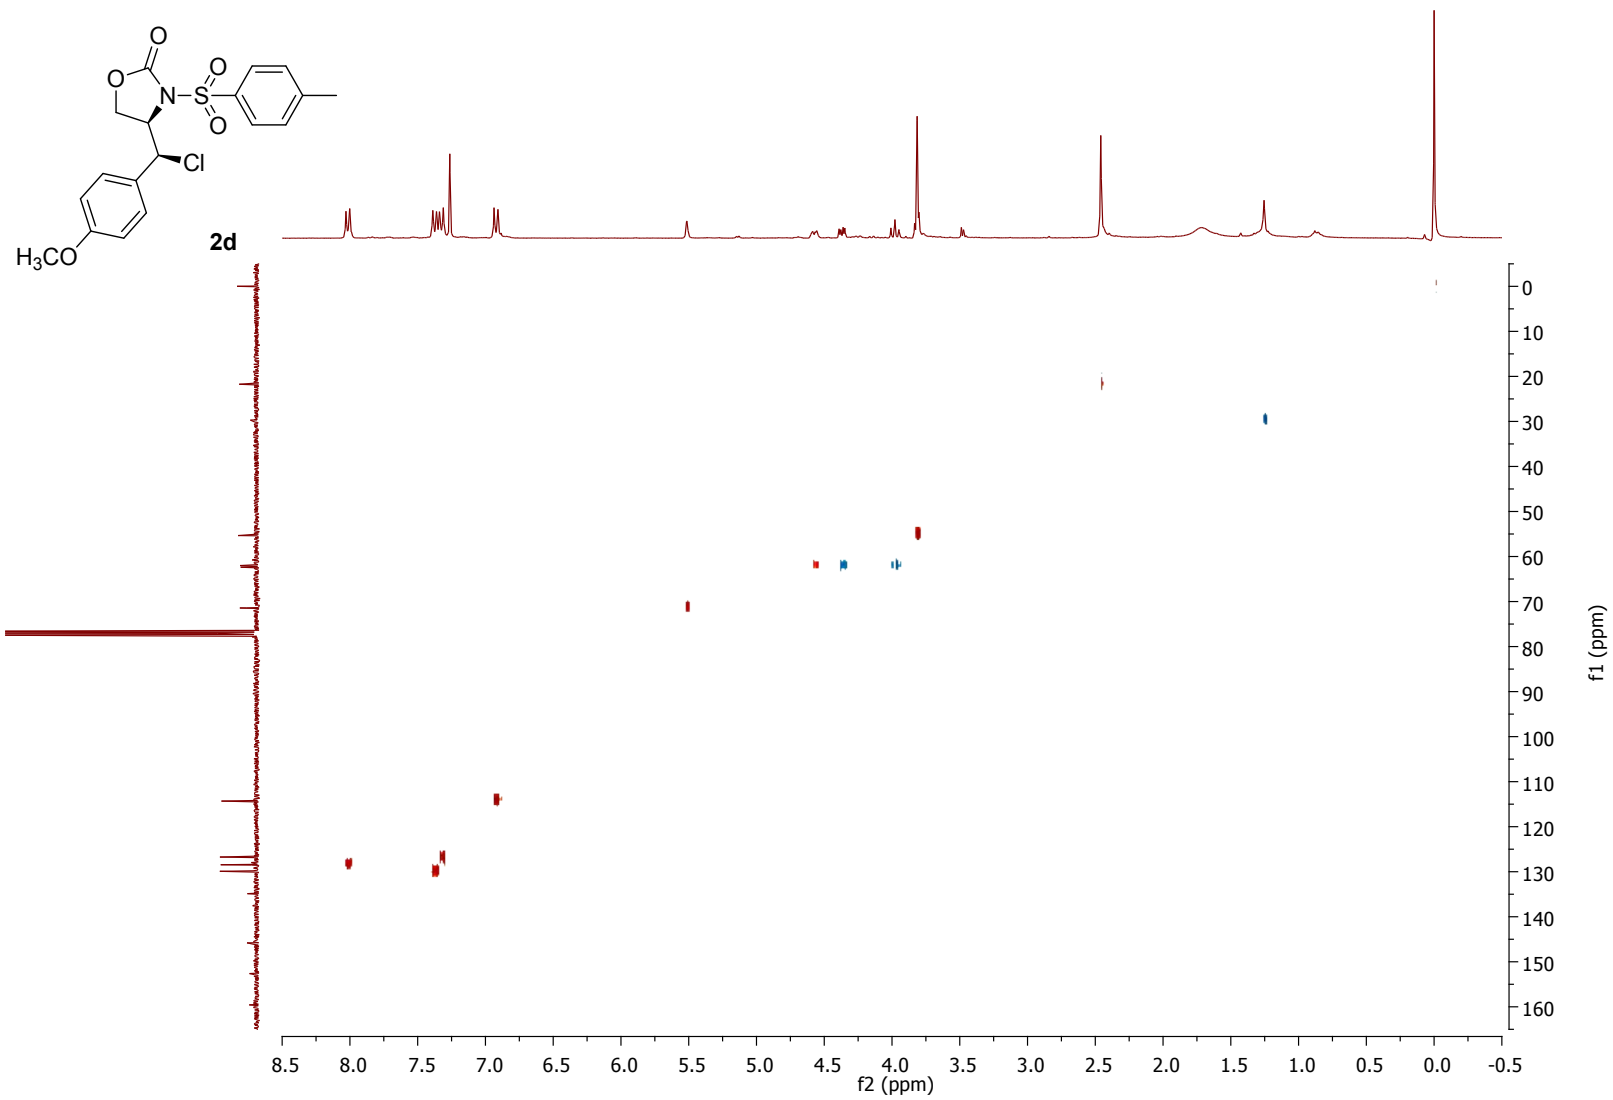

<sup>1</sup>H NMR (300 MHz, CDCl<sub>3</sub>) of substrate **2e**

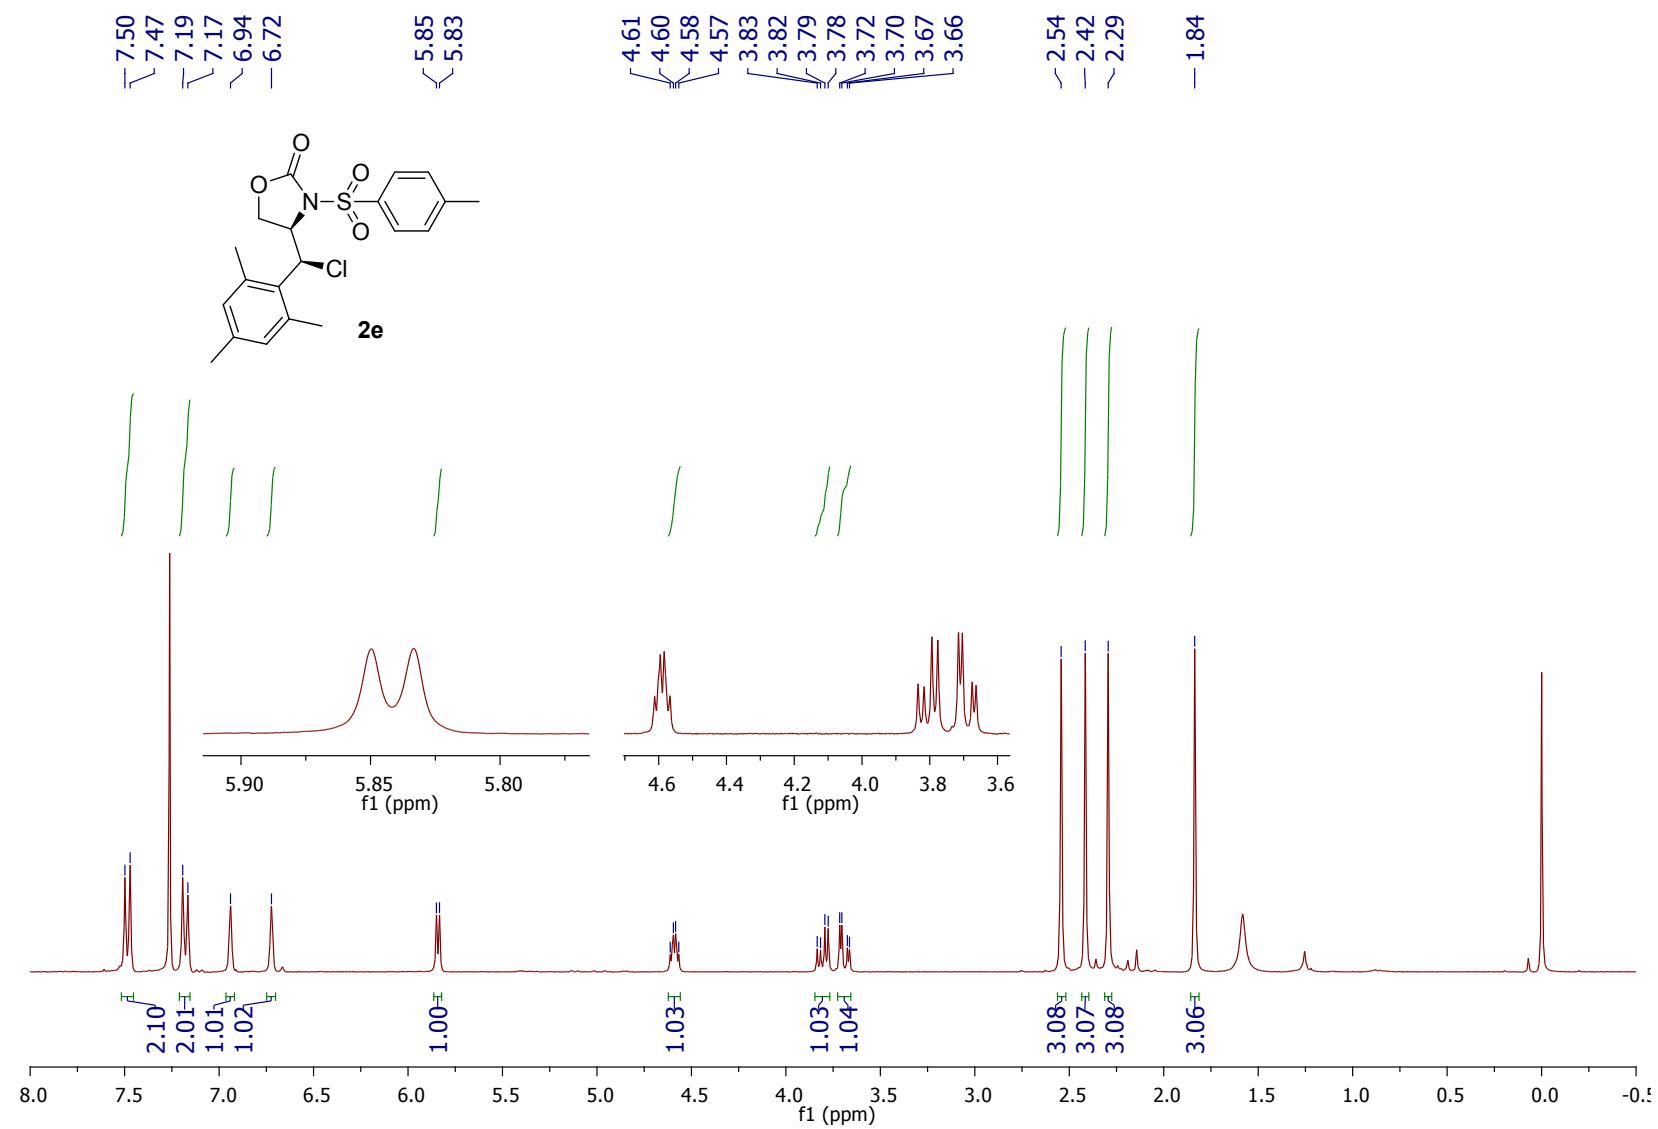

<sup>13</sup>C NMR (75 MHz, CDCl<sub>3</sub>) of substrate **2e**

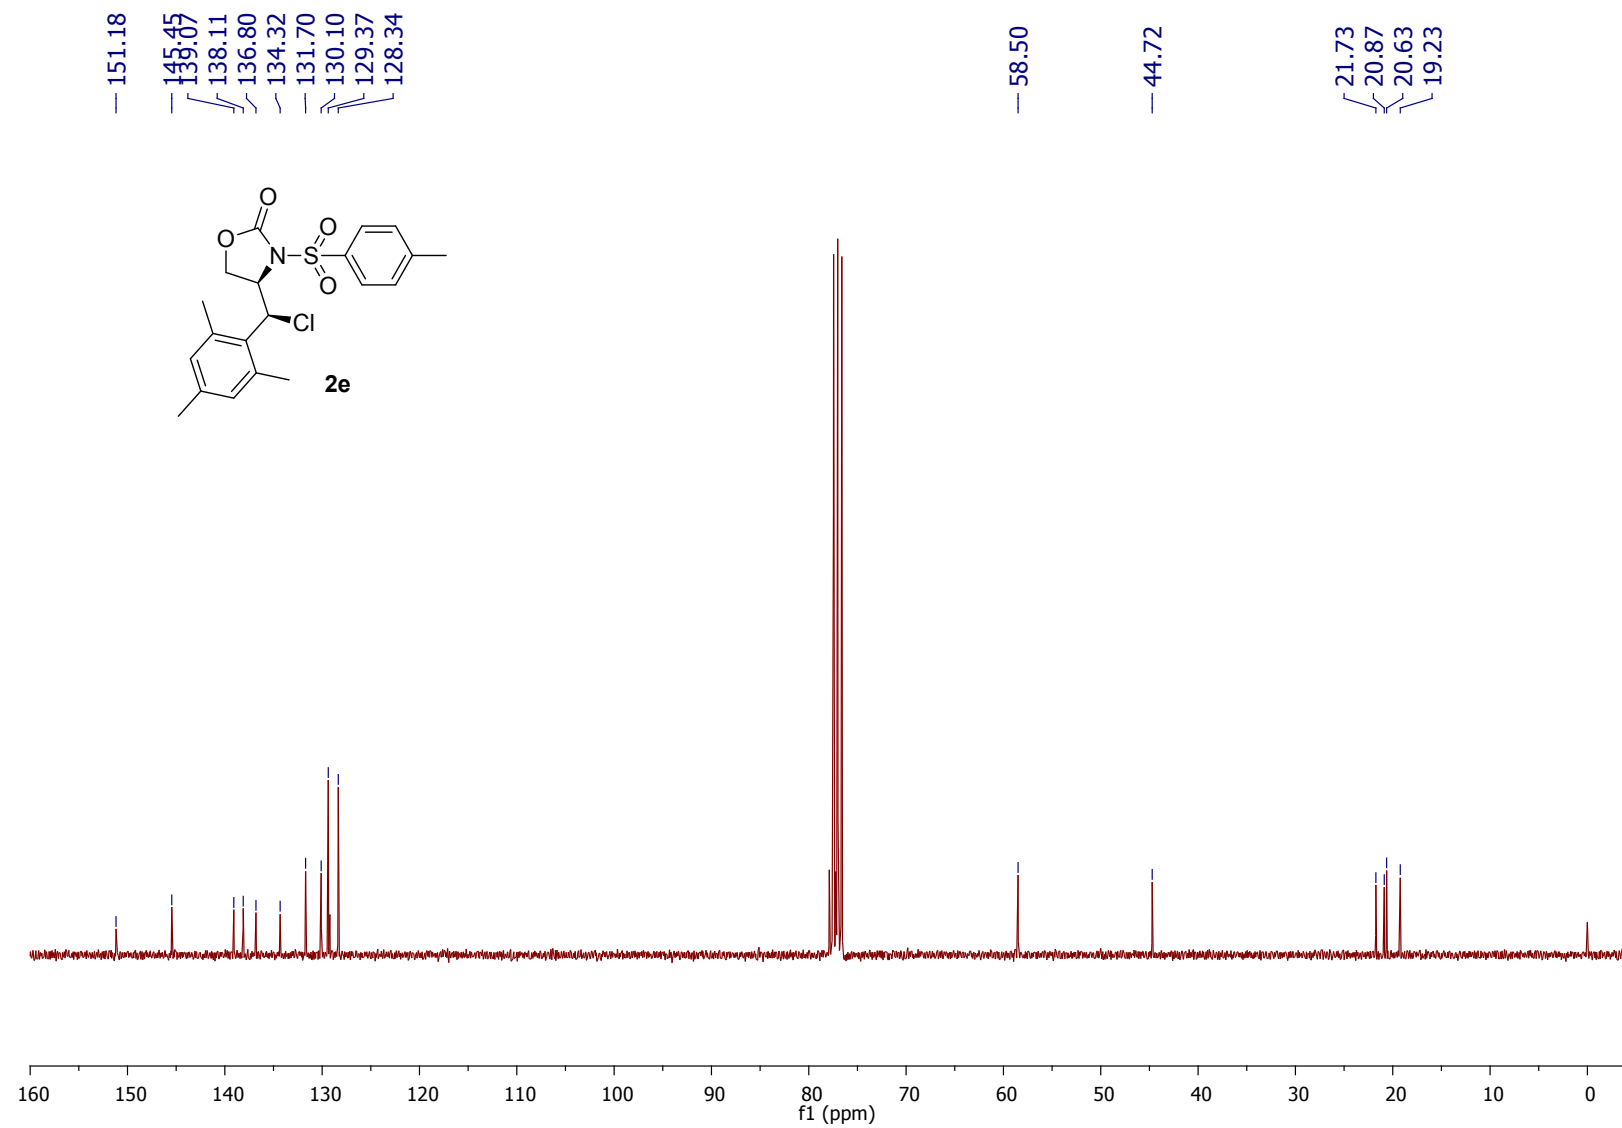

COSY of substrate **2e**

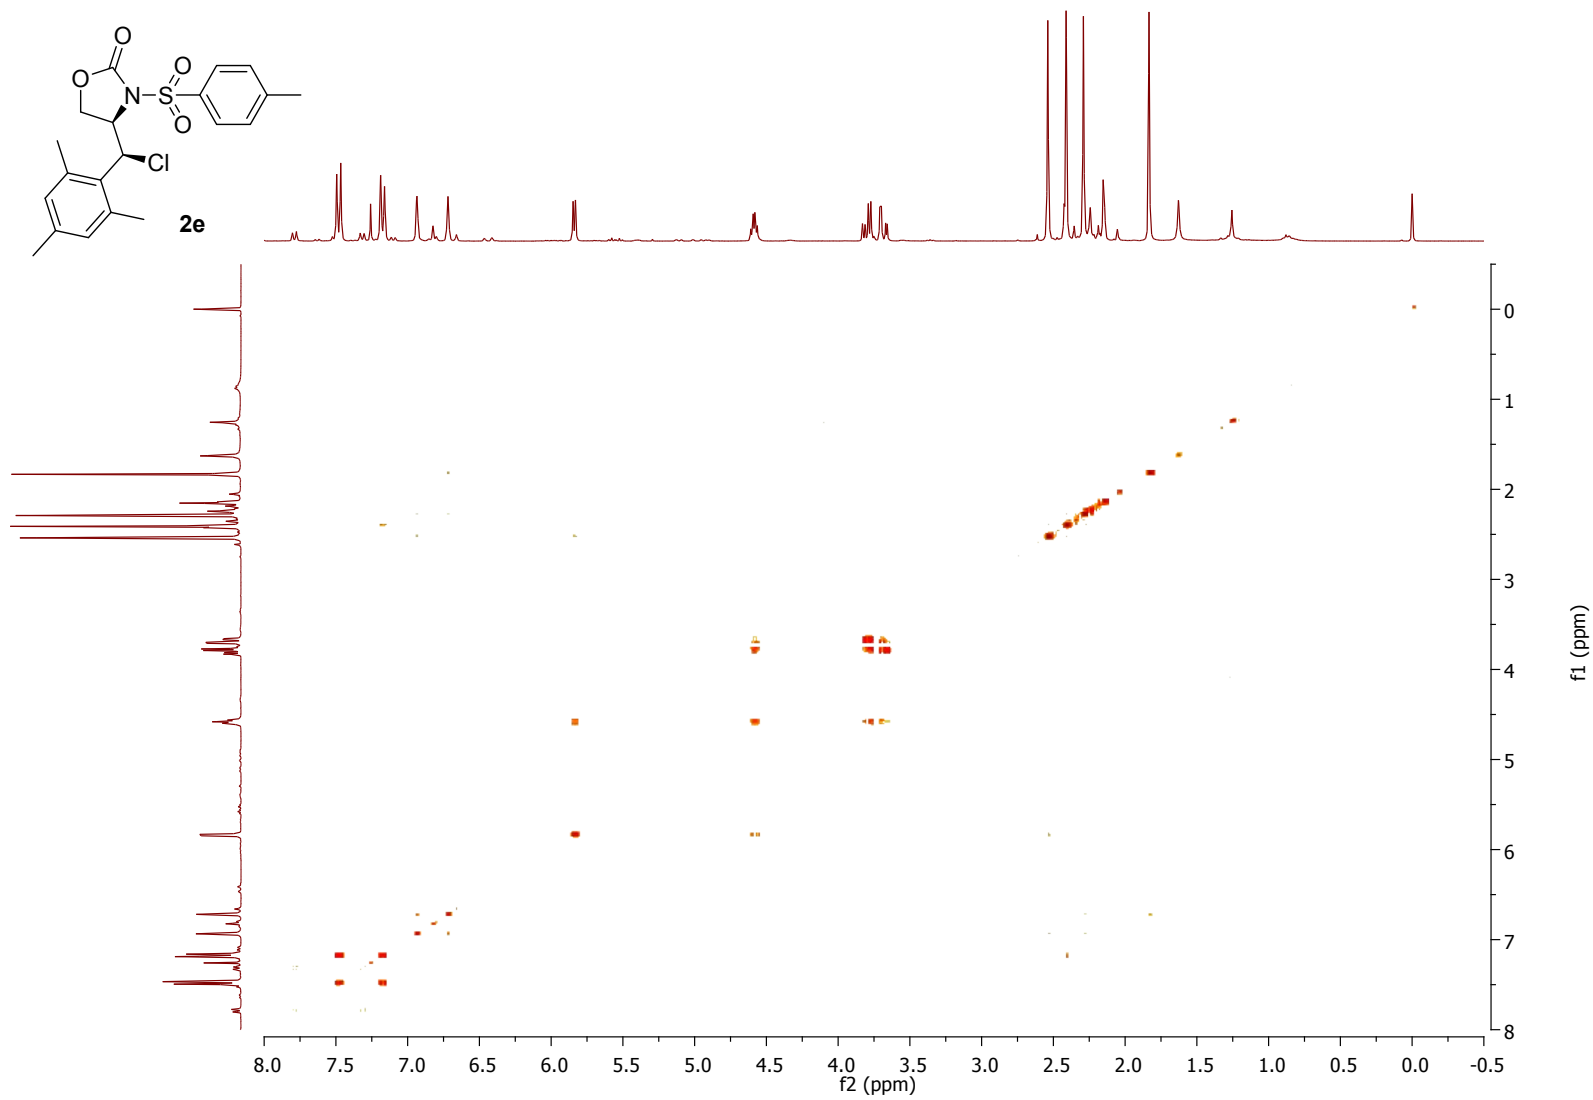

HSQC of substrate **2e**

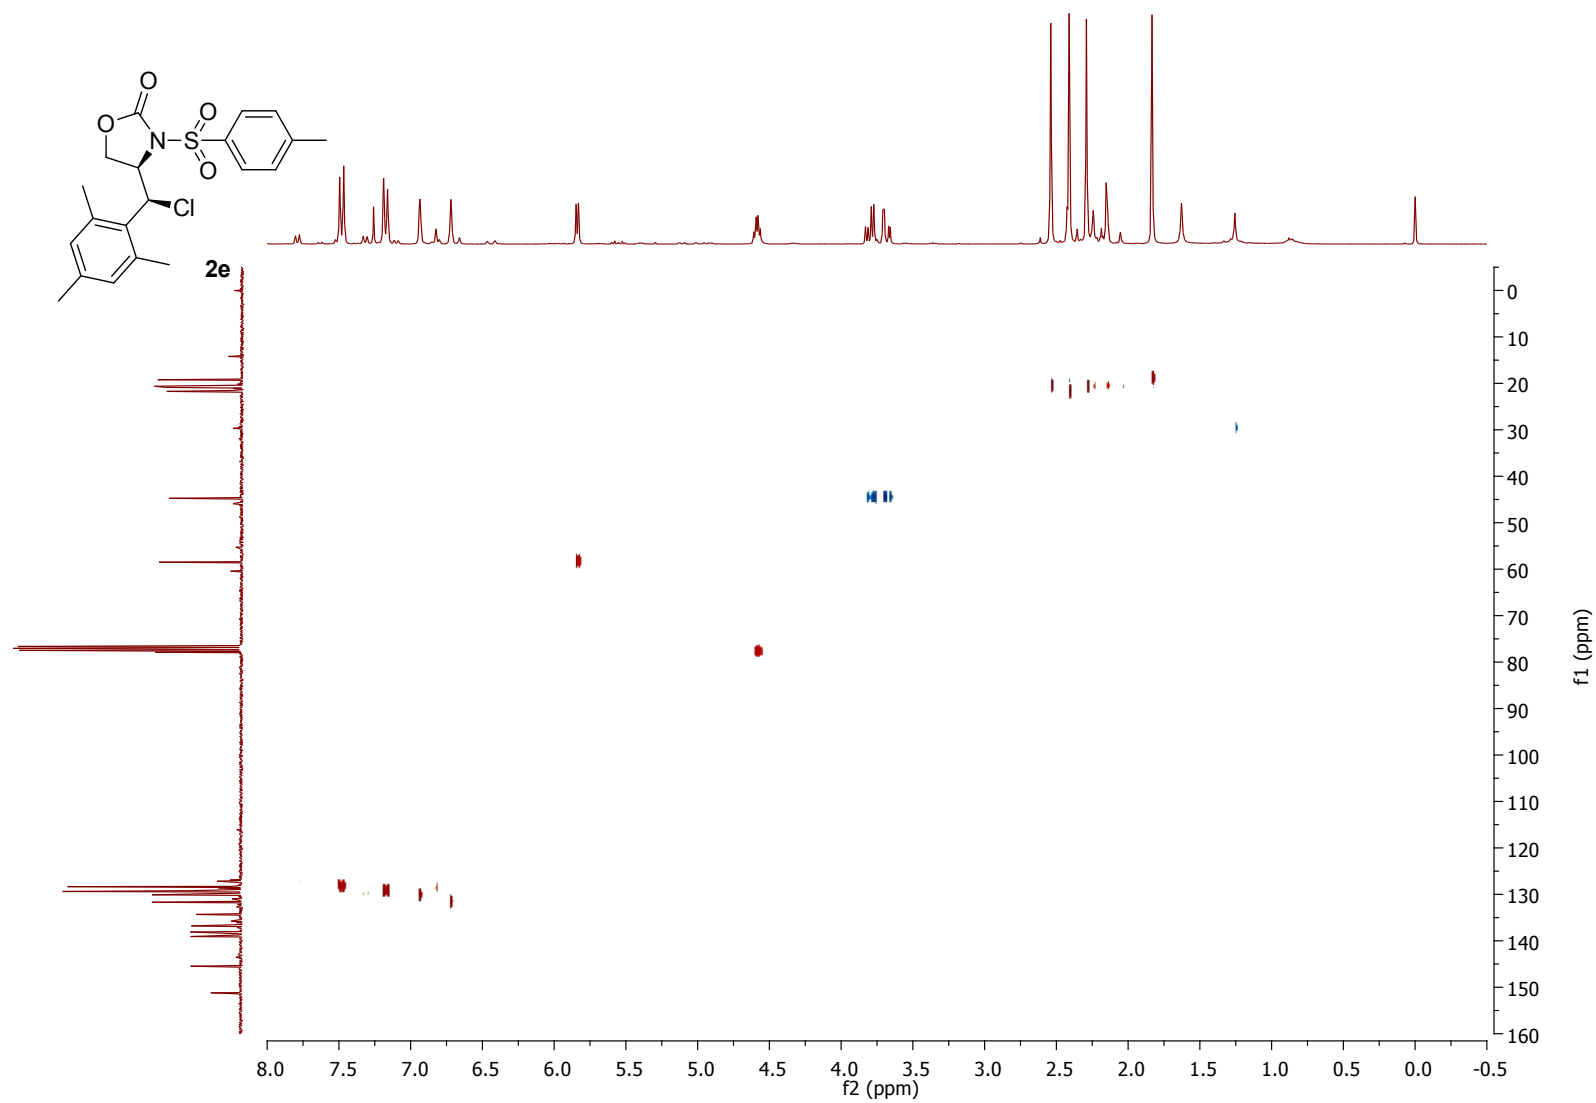

<sup>1</sup>H NMR (300 MHz, CDCl<sub>3</sub>) of substrate **2f**

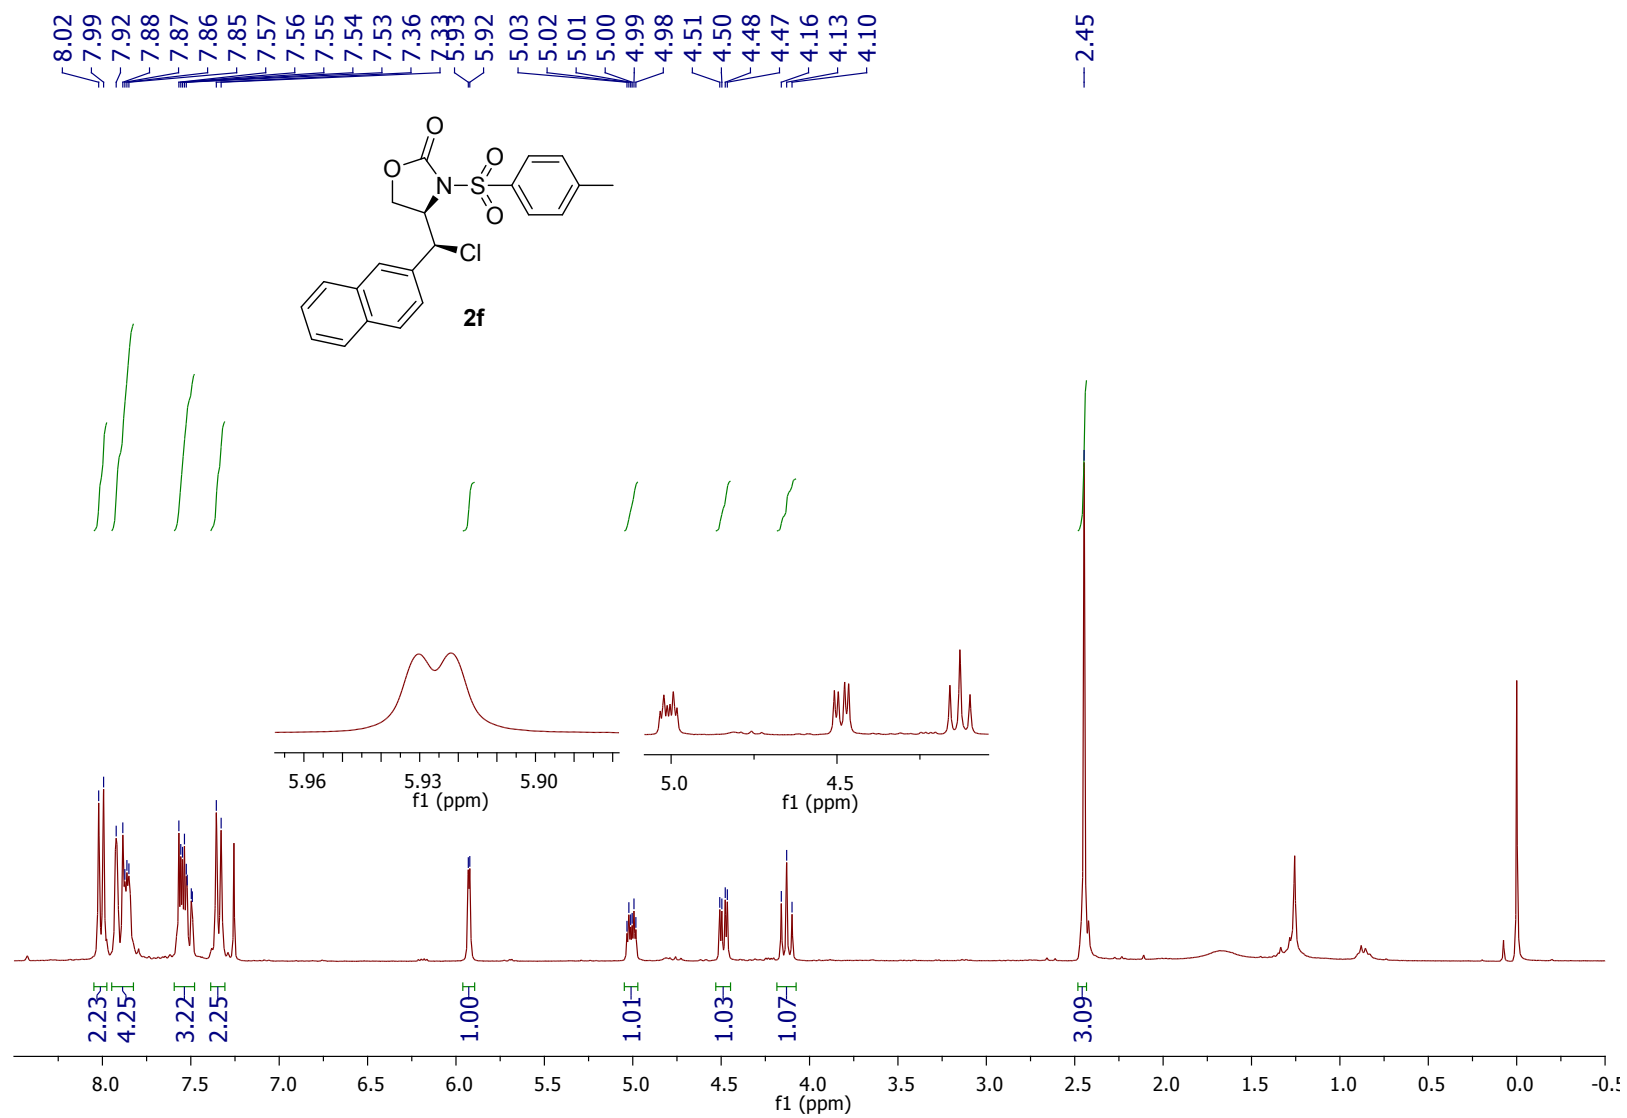

<sup>13</sup>C NMR (75 MHz, CDCl<sub>3</sub>) of substrate **2f**

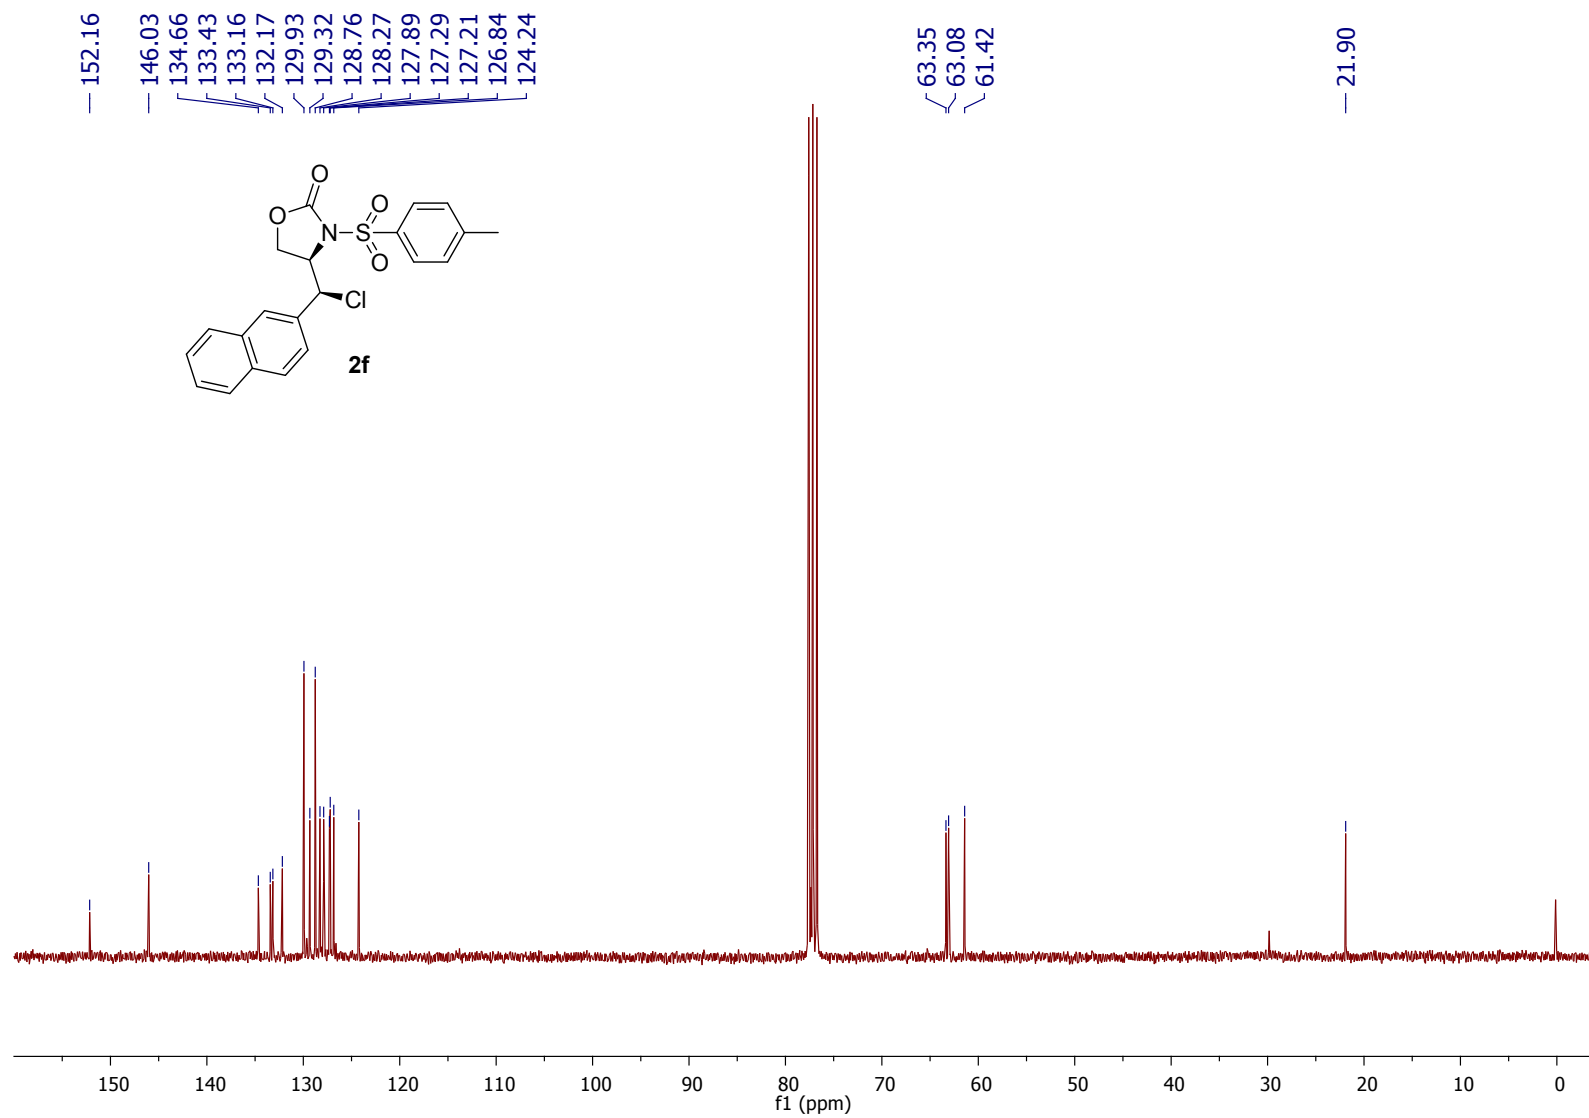

COSY of substrate **2f**

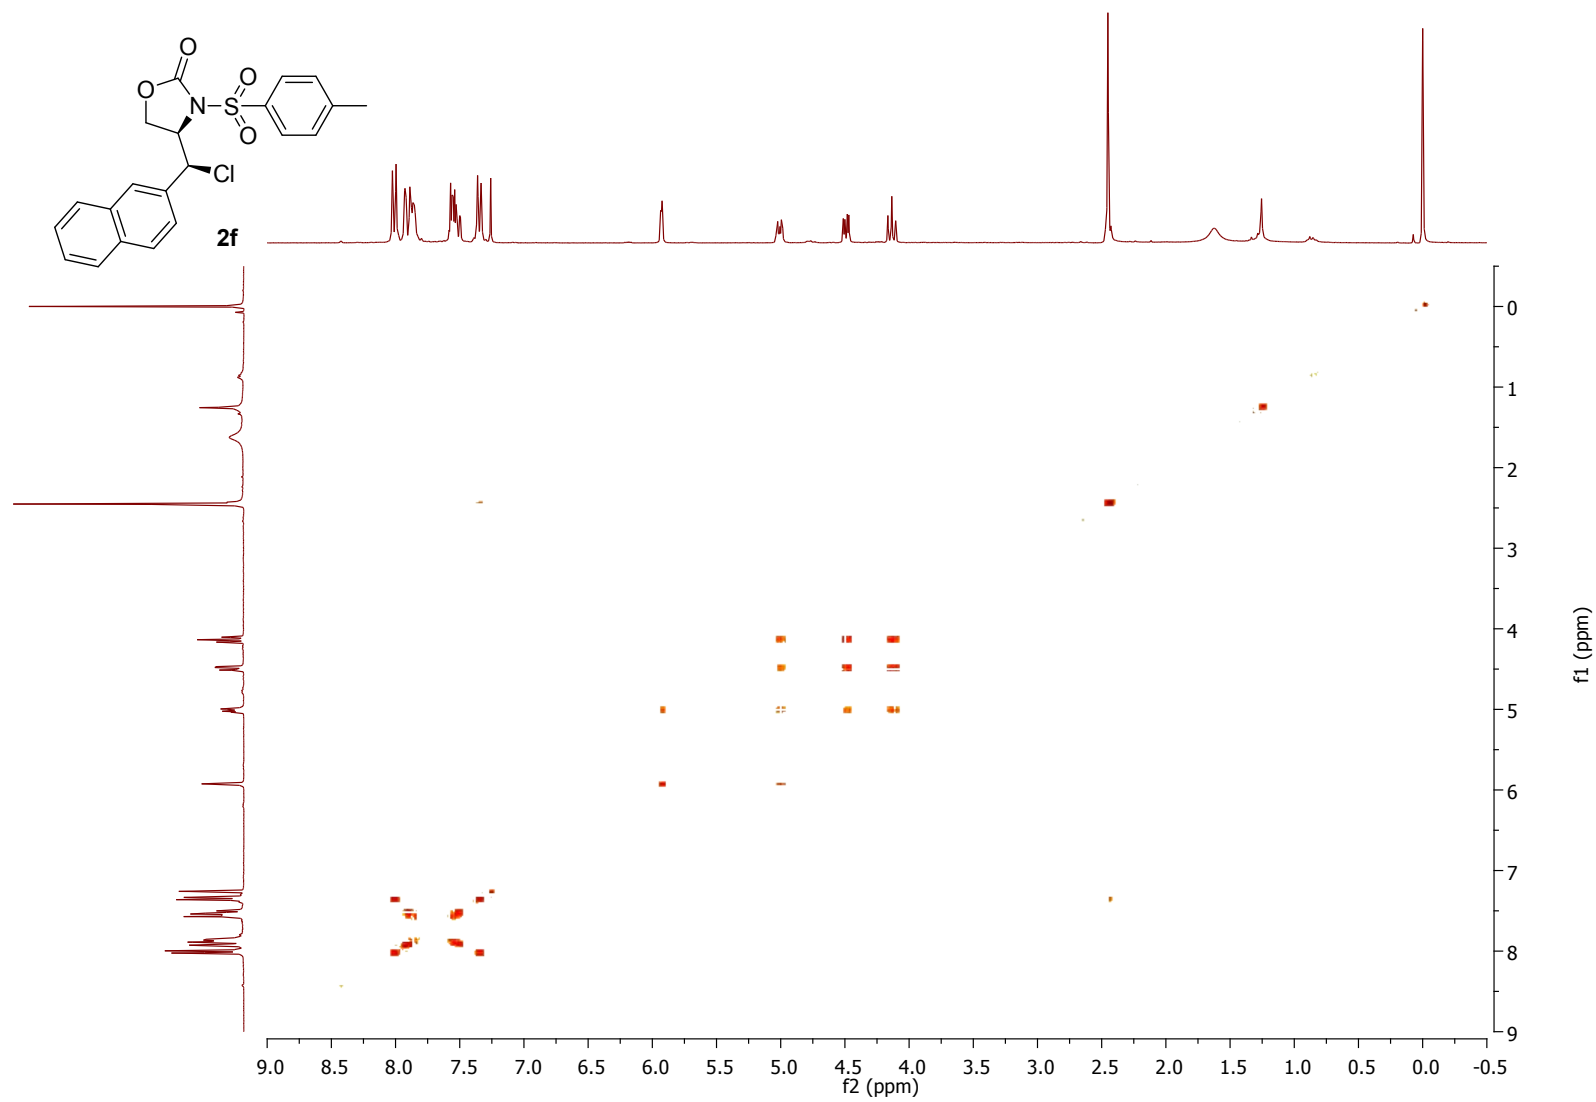



HSQC of substrate **2f**

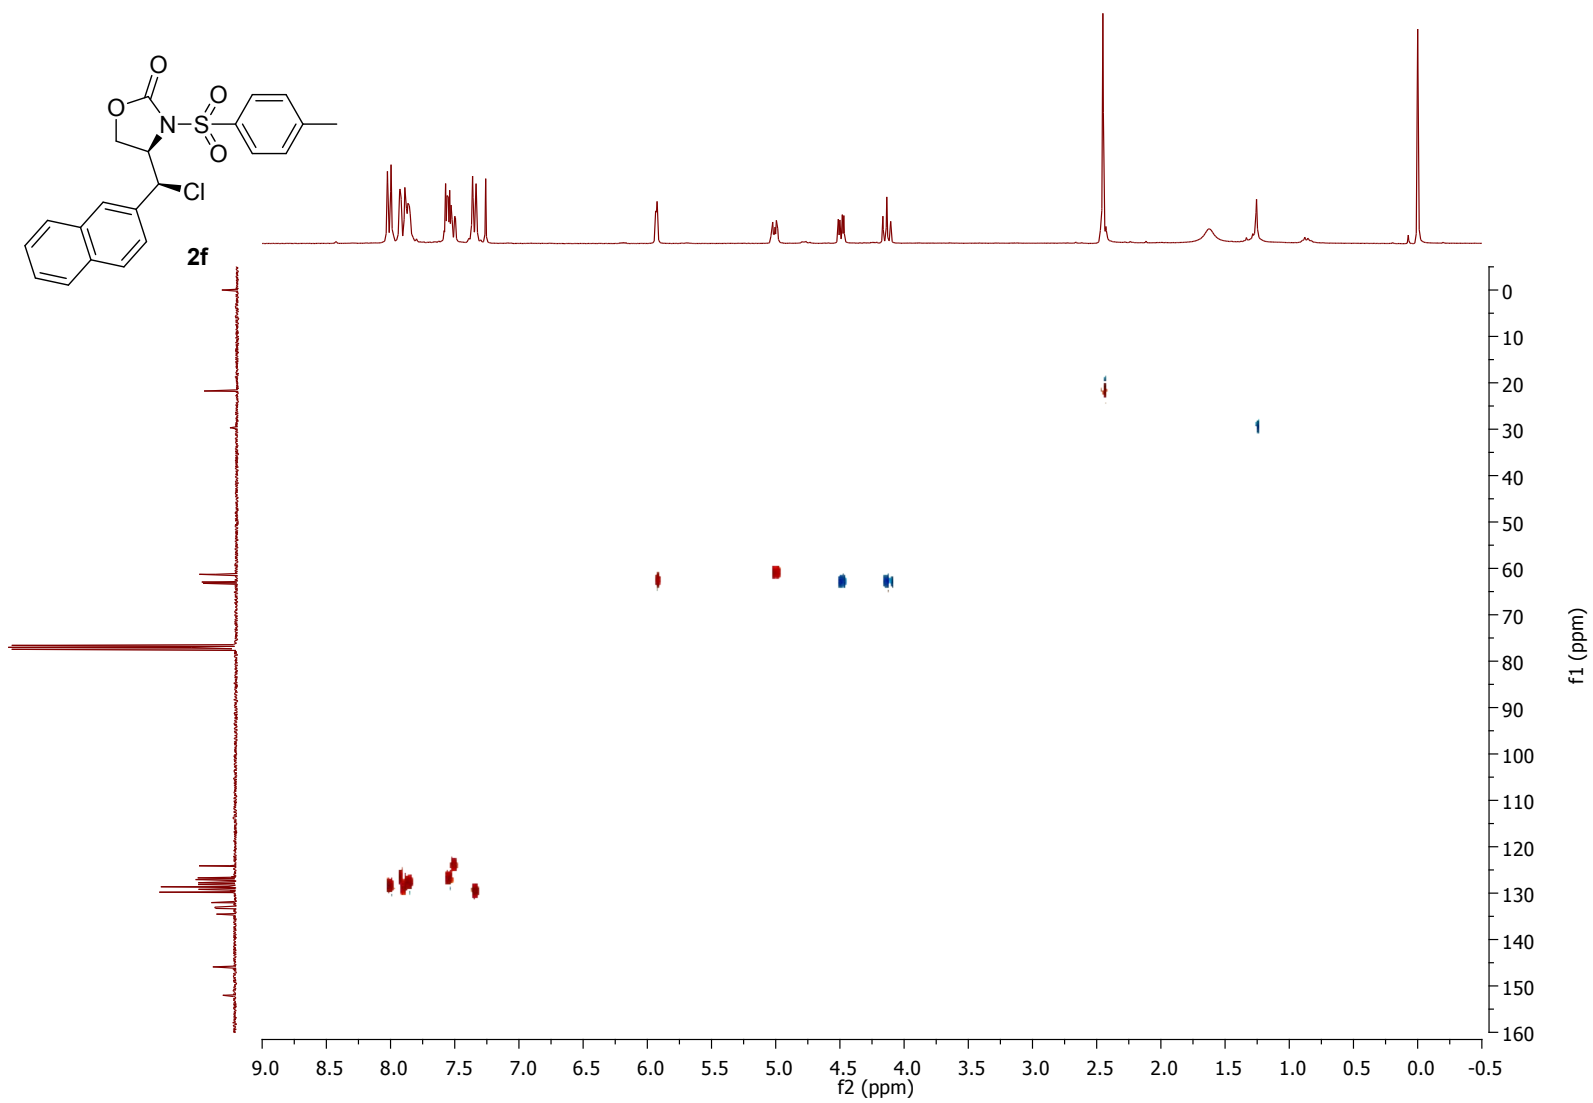

<sup>1</sup>H NMR (300 MHz, DMSO-*d*<sub>6</sub>) of substrate **2g**

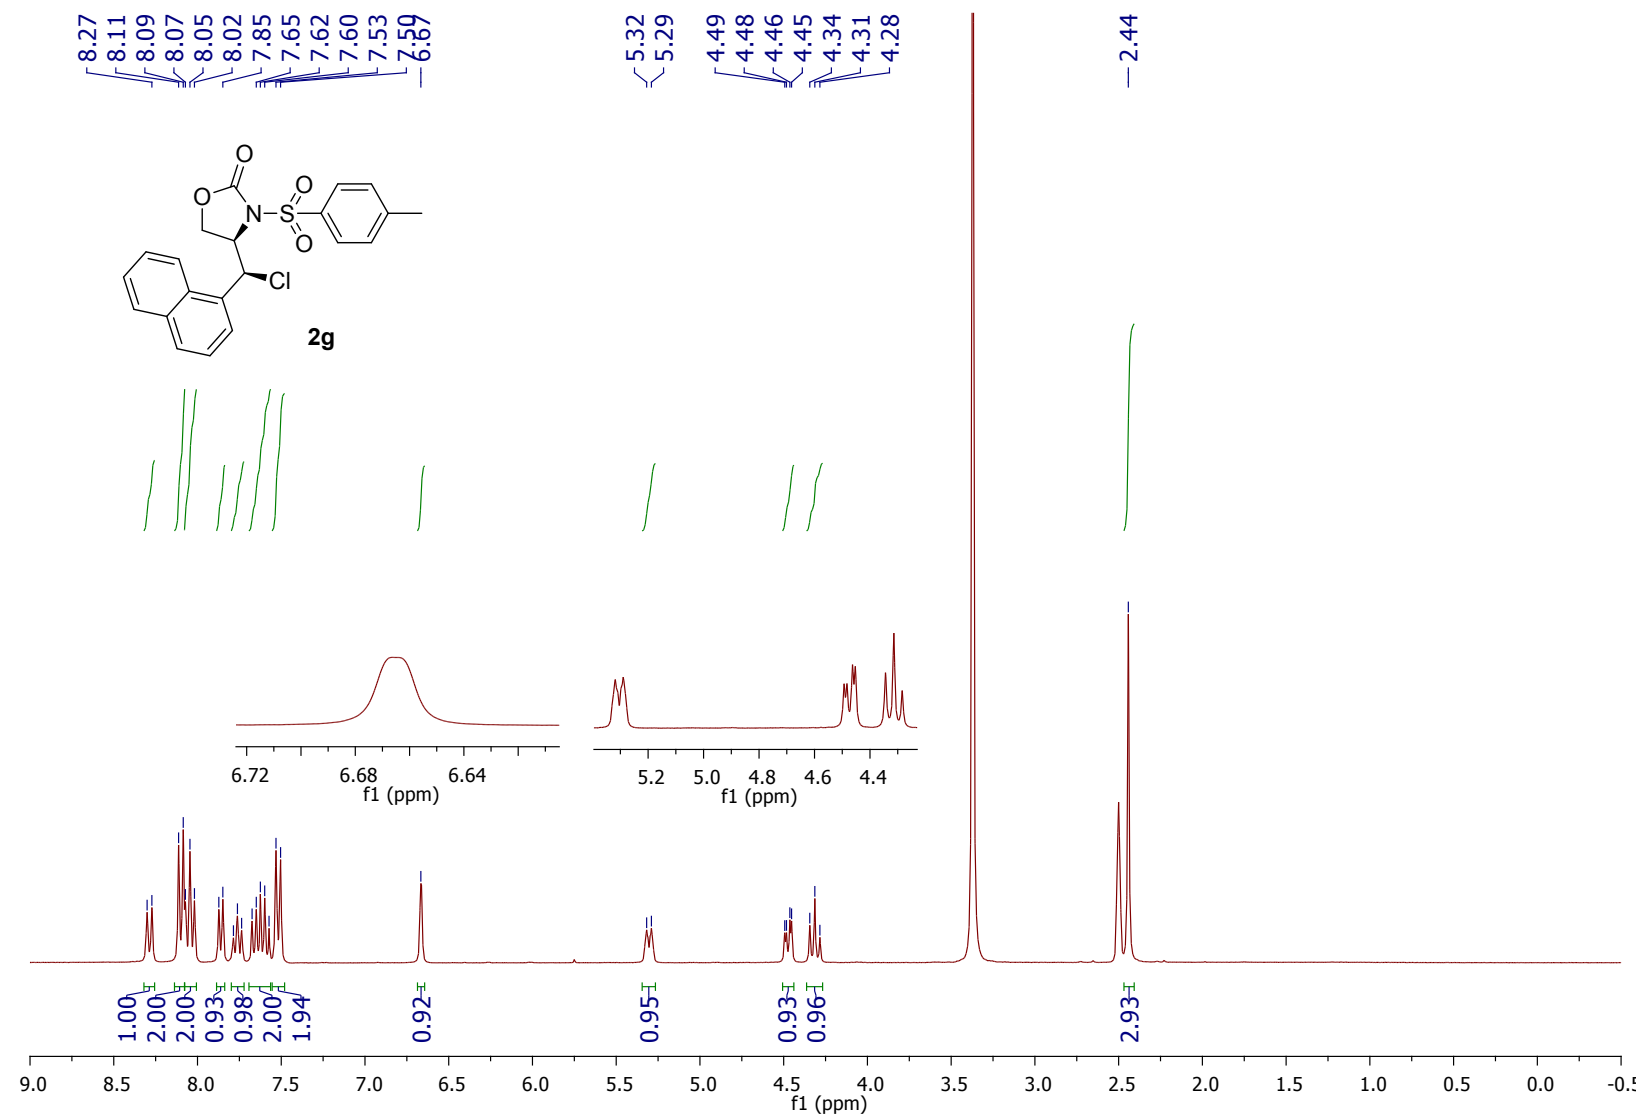

<sup>13</sup>C NMR (75 MHz, DMSO-d<sub>6</sub>) of substrate **2g**

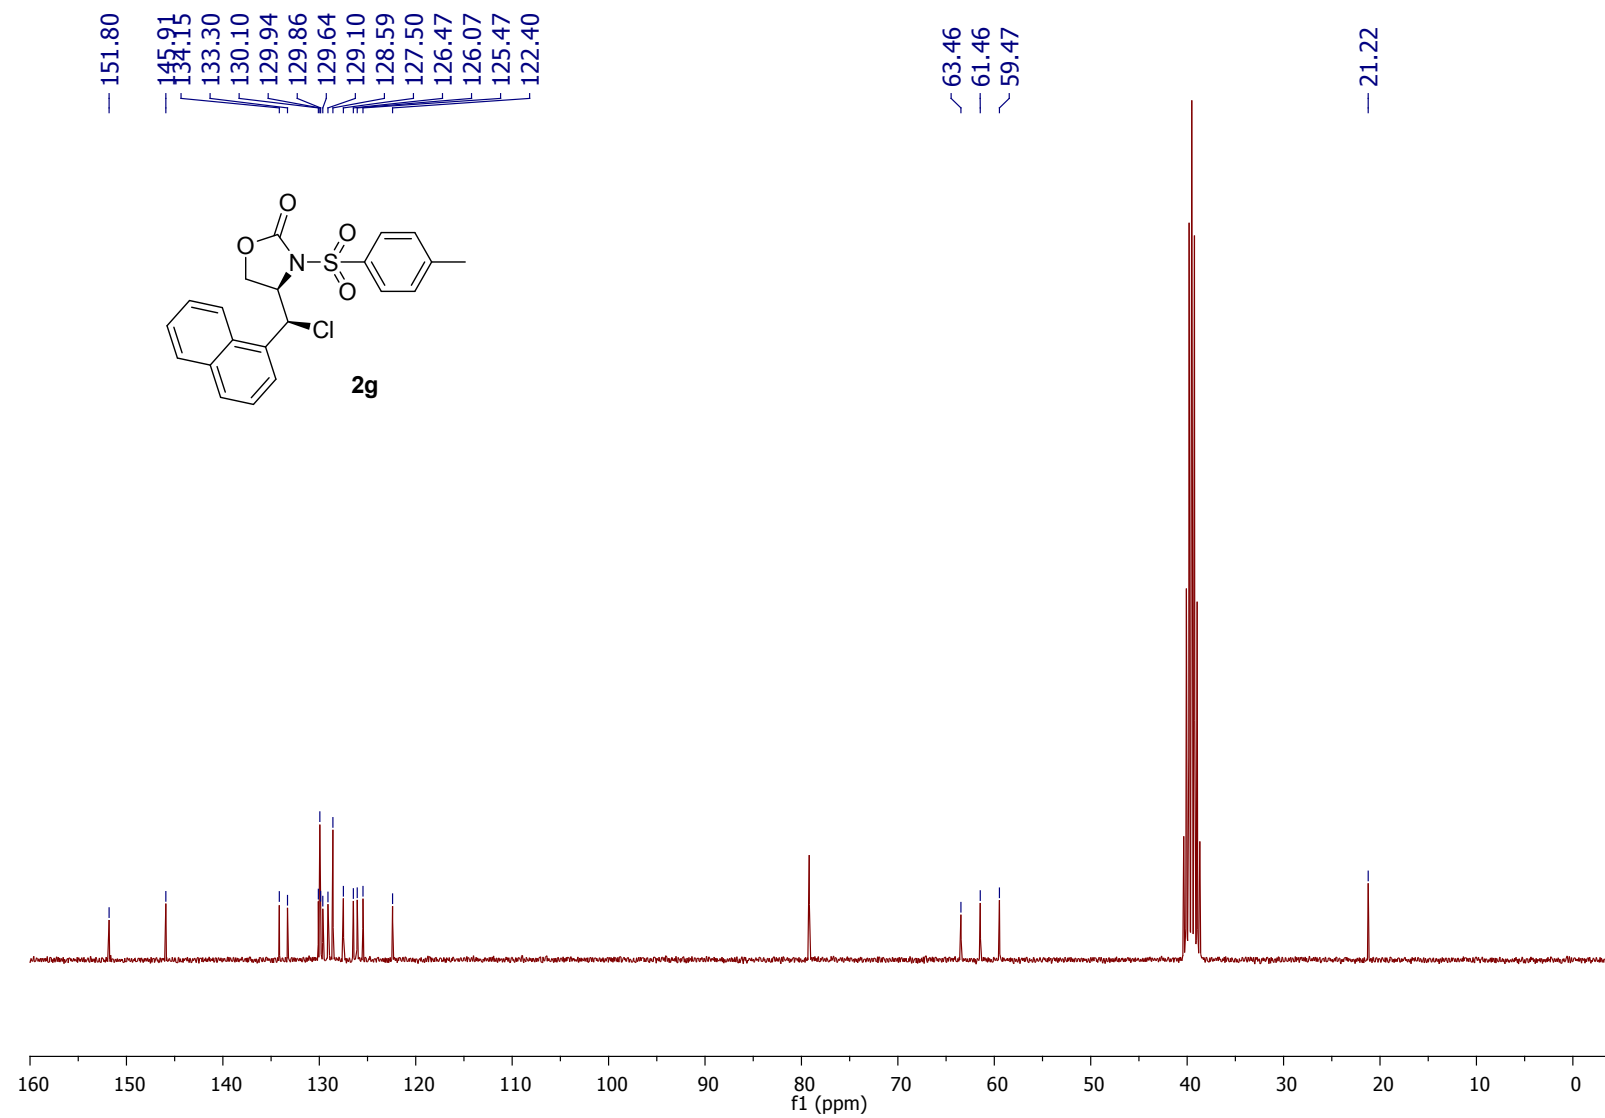

COSY of substrate **2g**

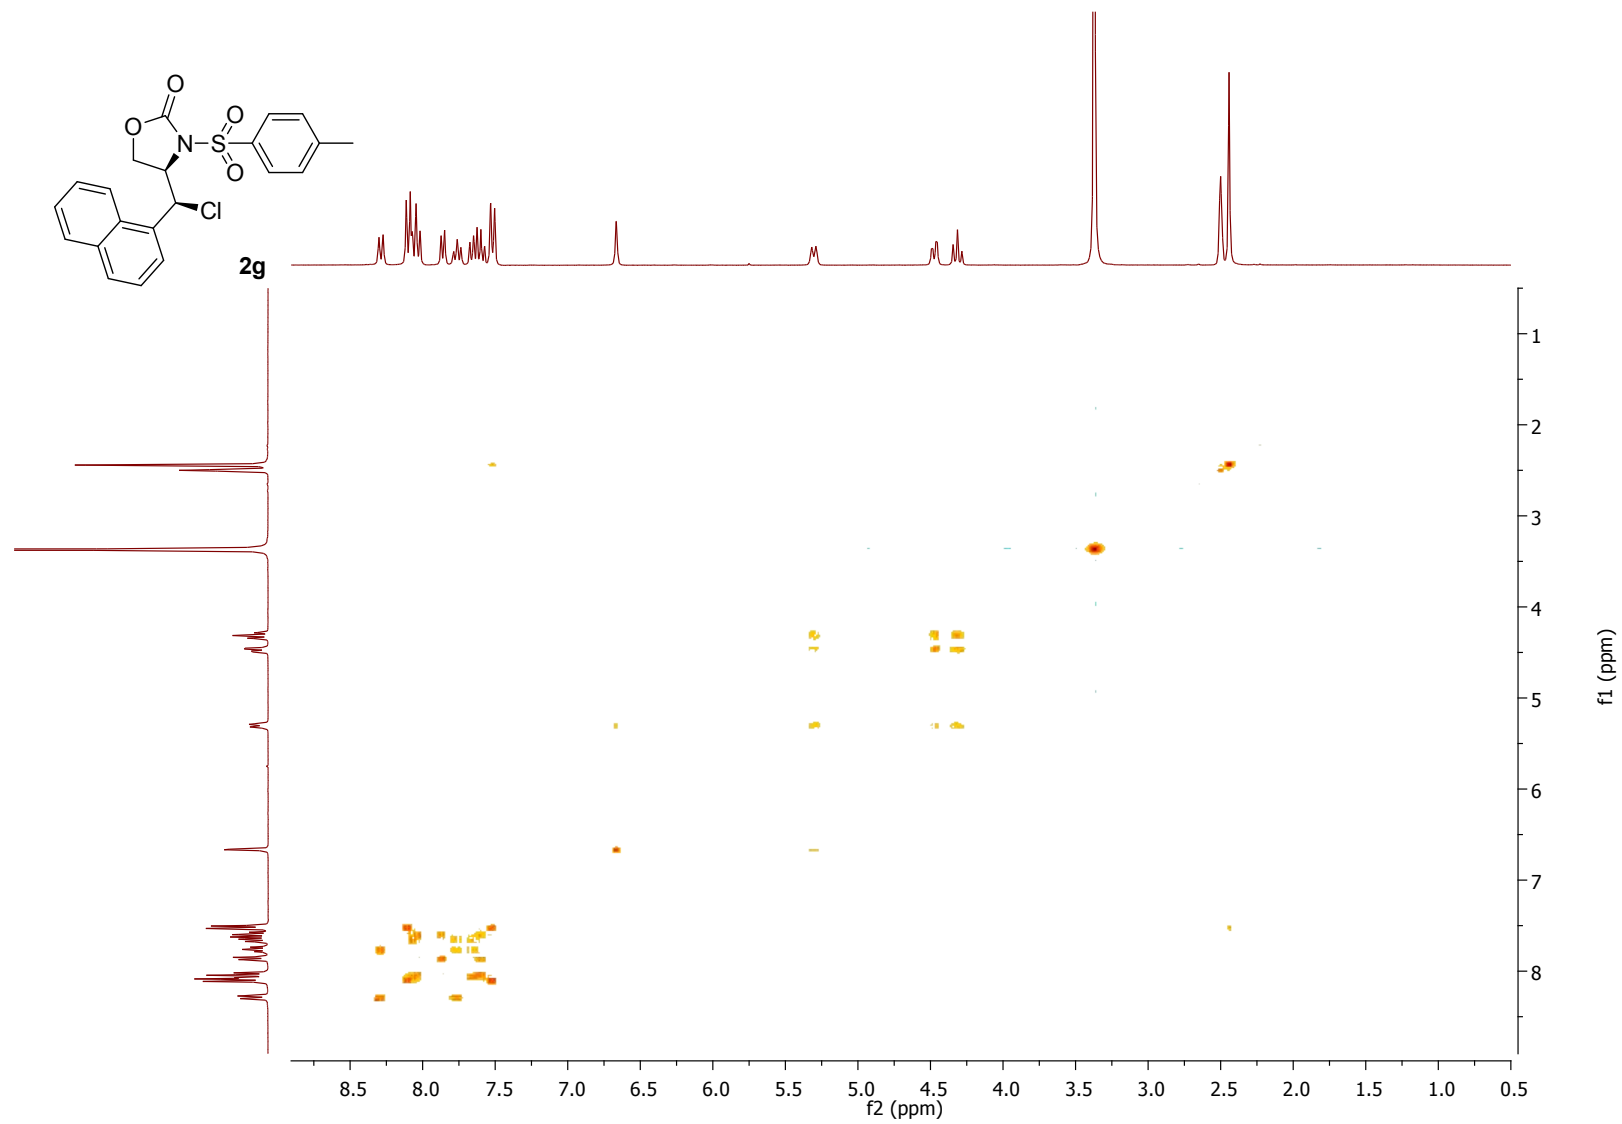

HSQC of substrate **2g**

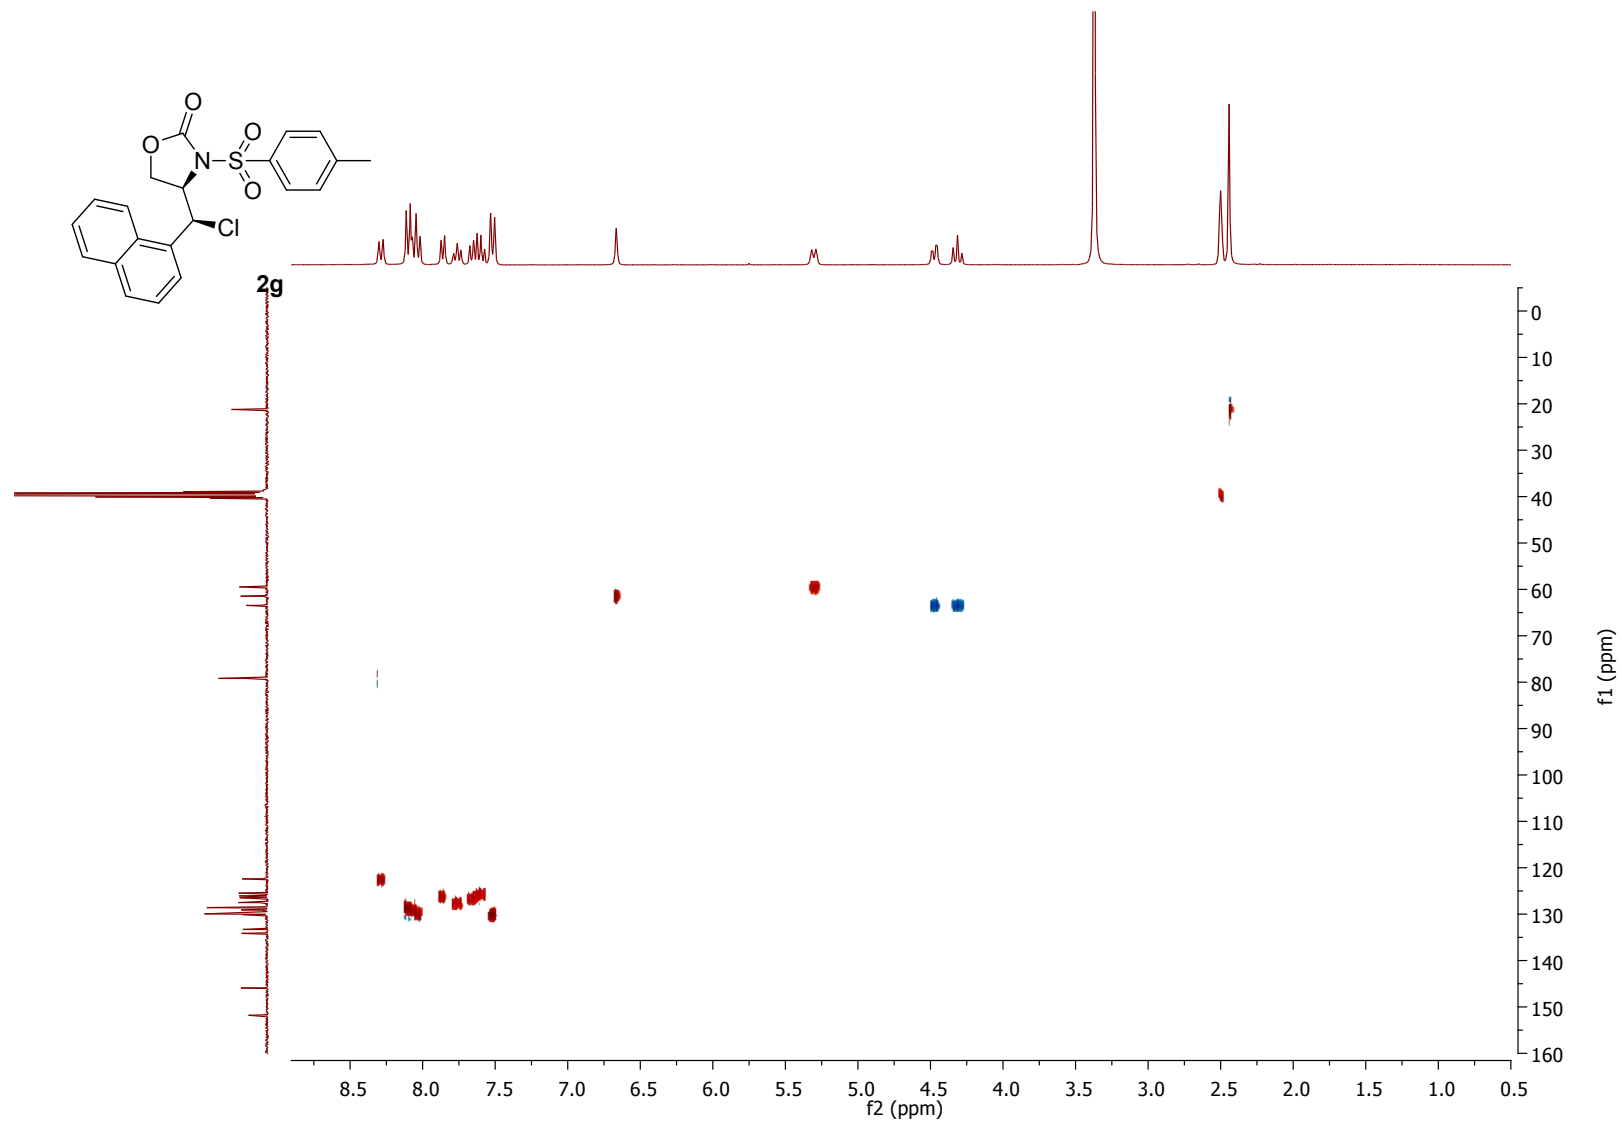

$^1\text{H}$  NMR (300 MHz,  $\text{CDCl}_3$ ) of substrate **2h**

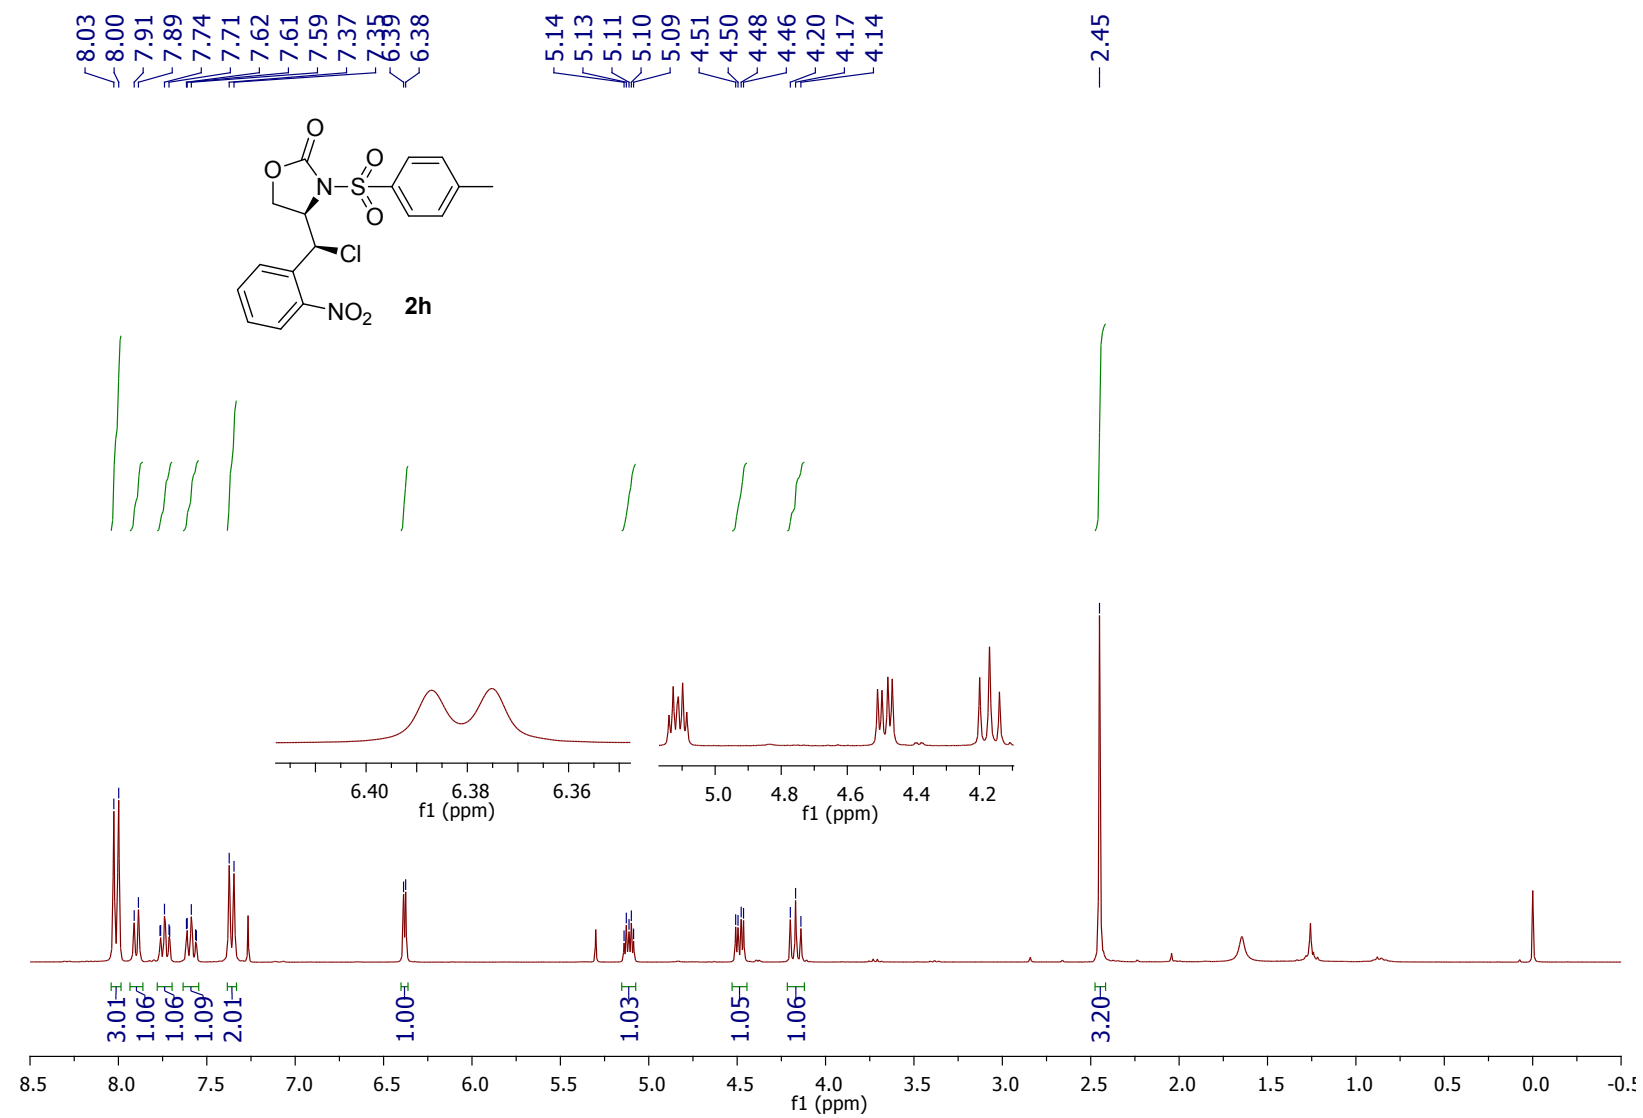

<sup>13</sup>C NMR (75 MHz, CDCl<sub>3</sub>) of substrate **2h**

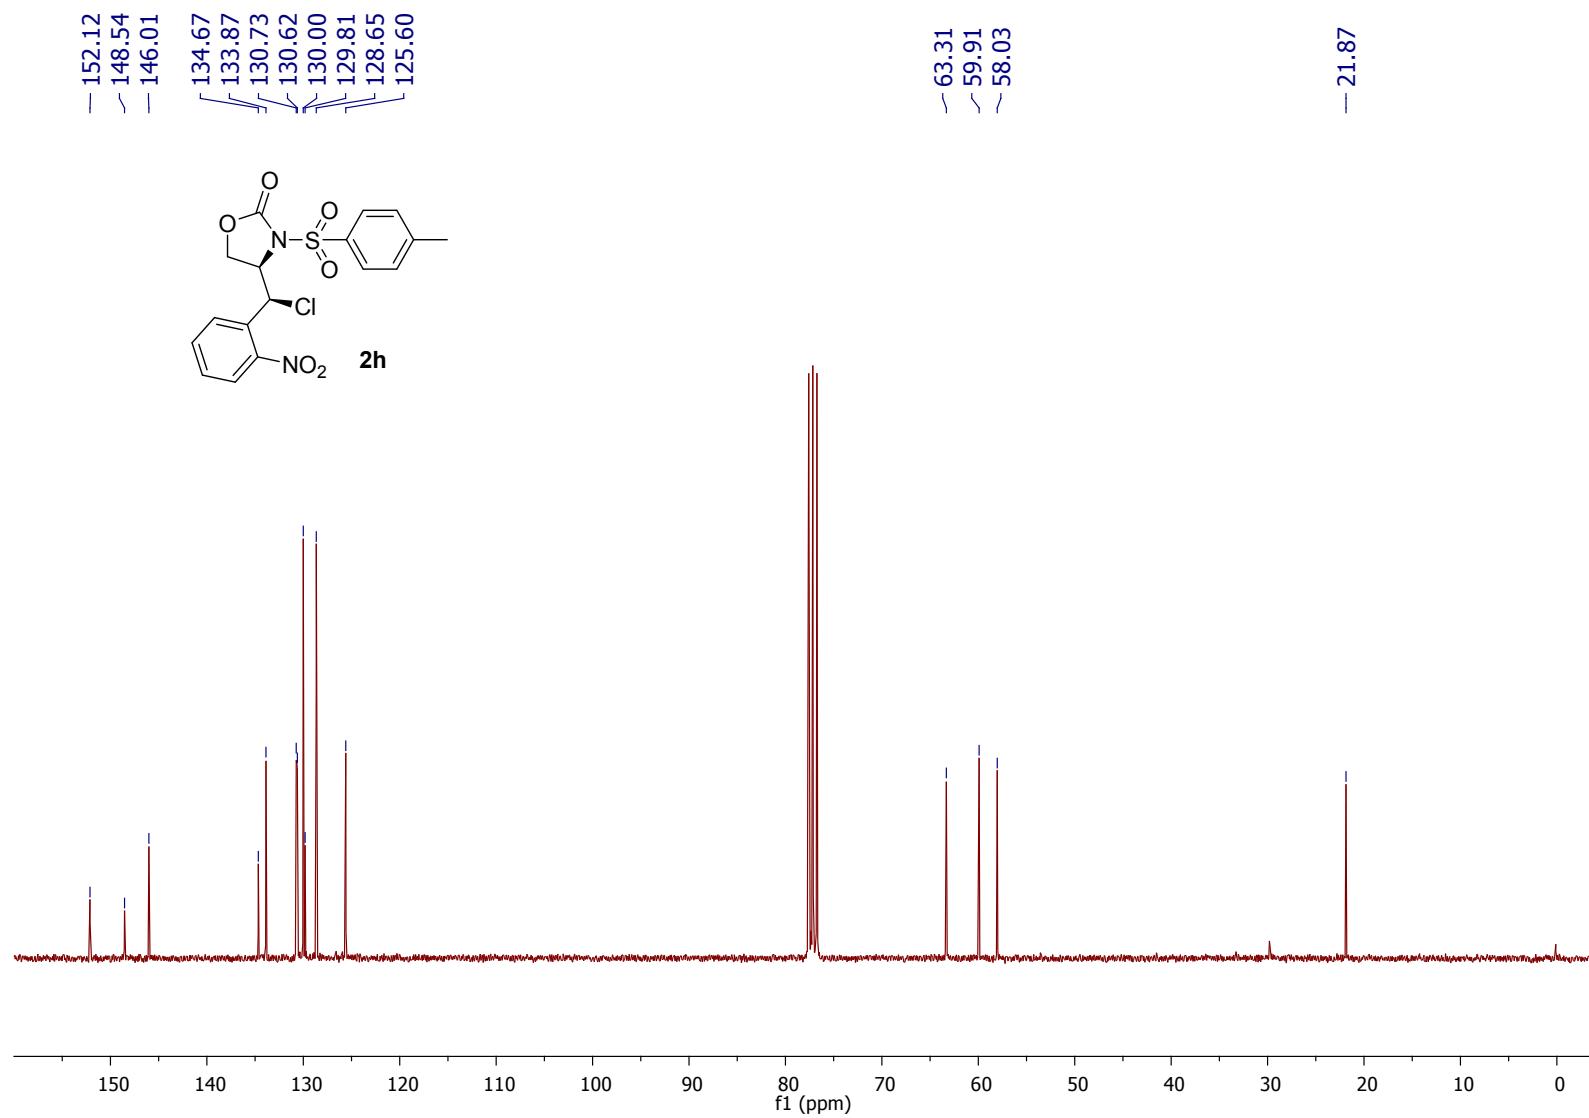

COSY of substrate **2h**

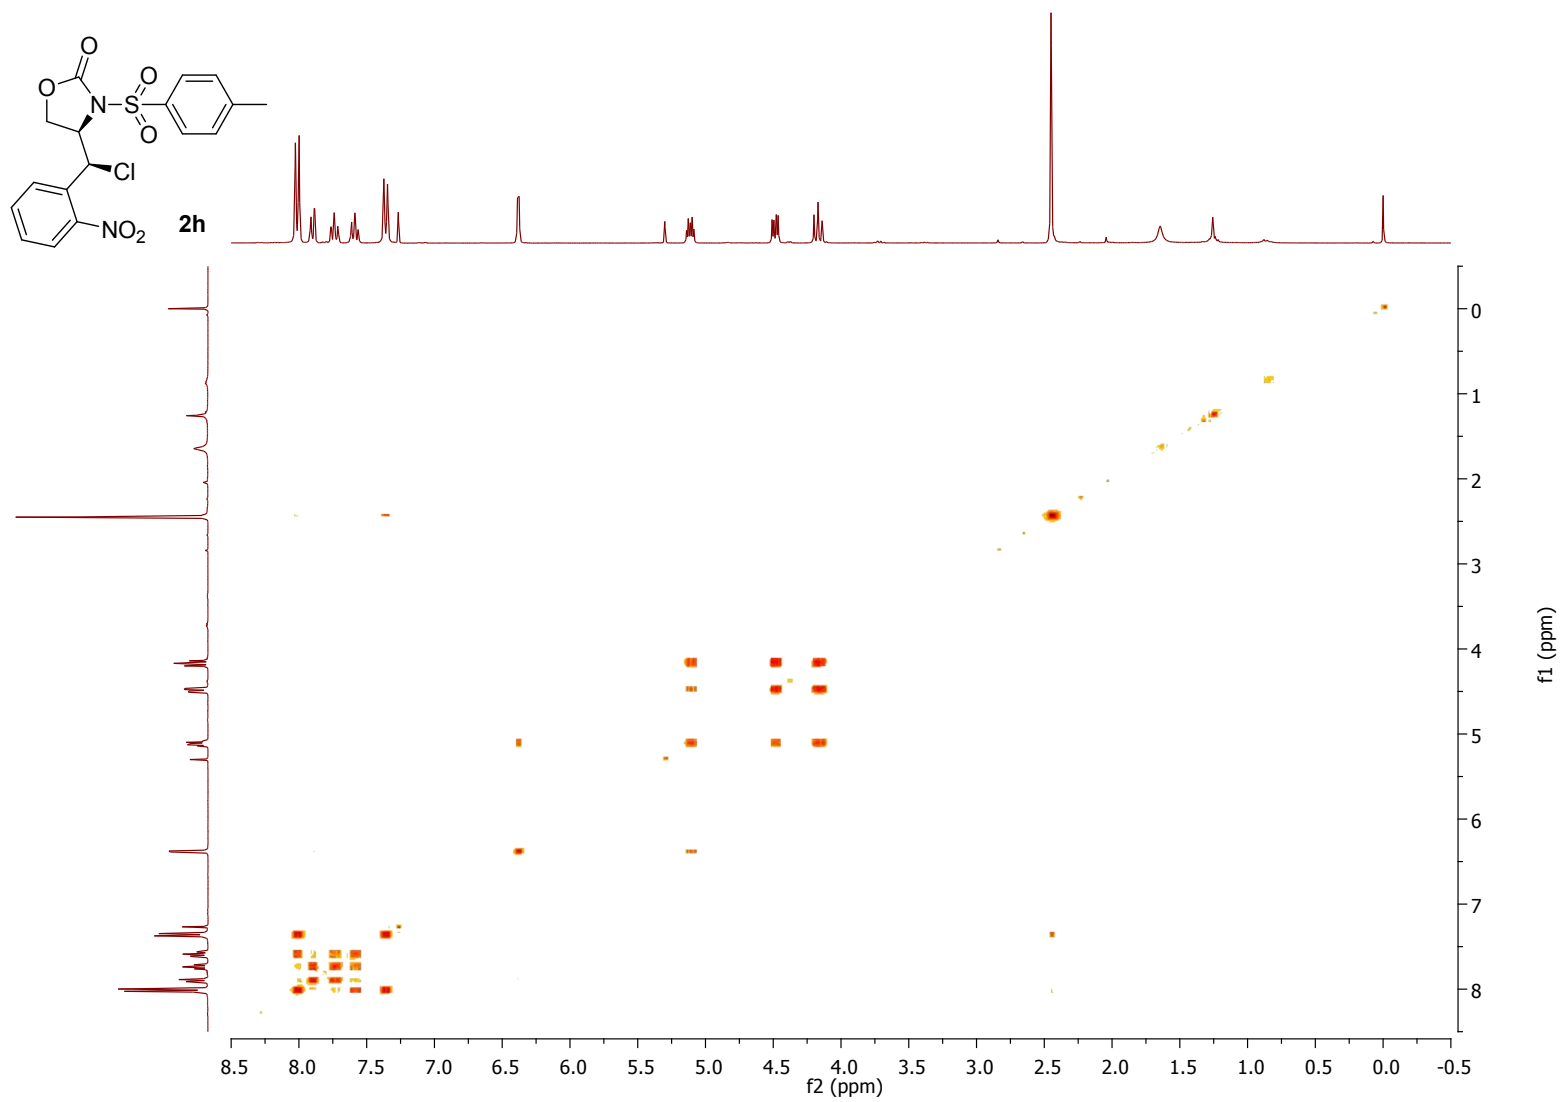



HSQC of substrate **2h**

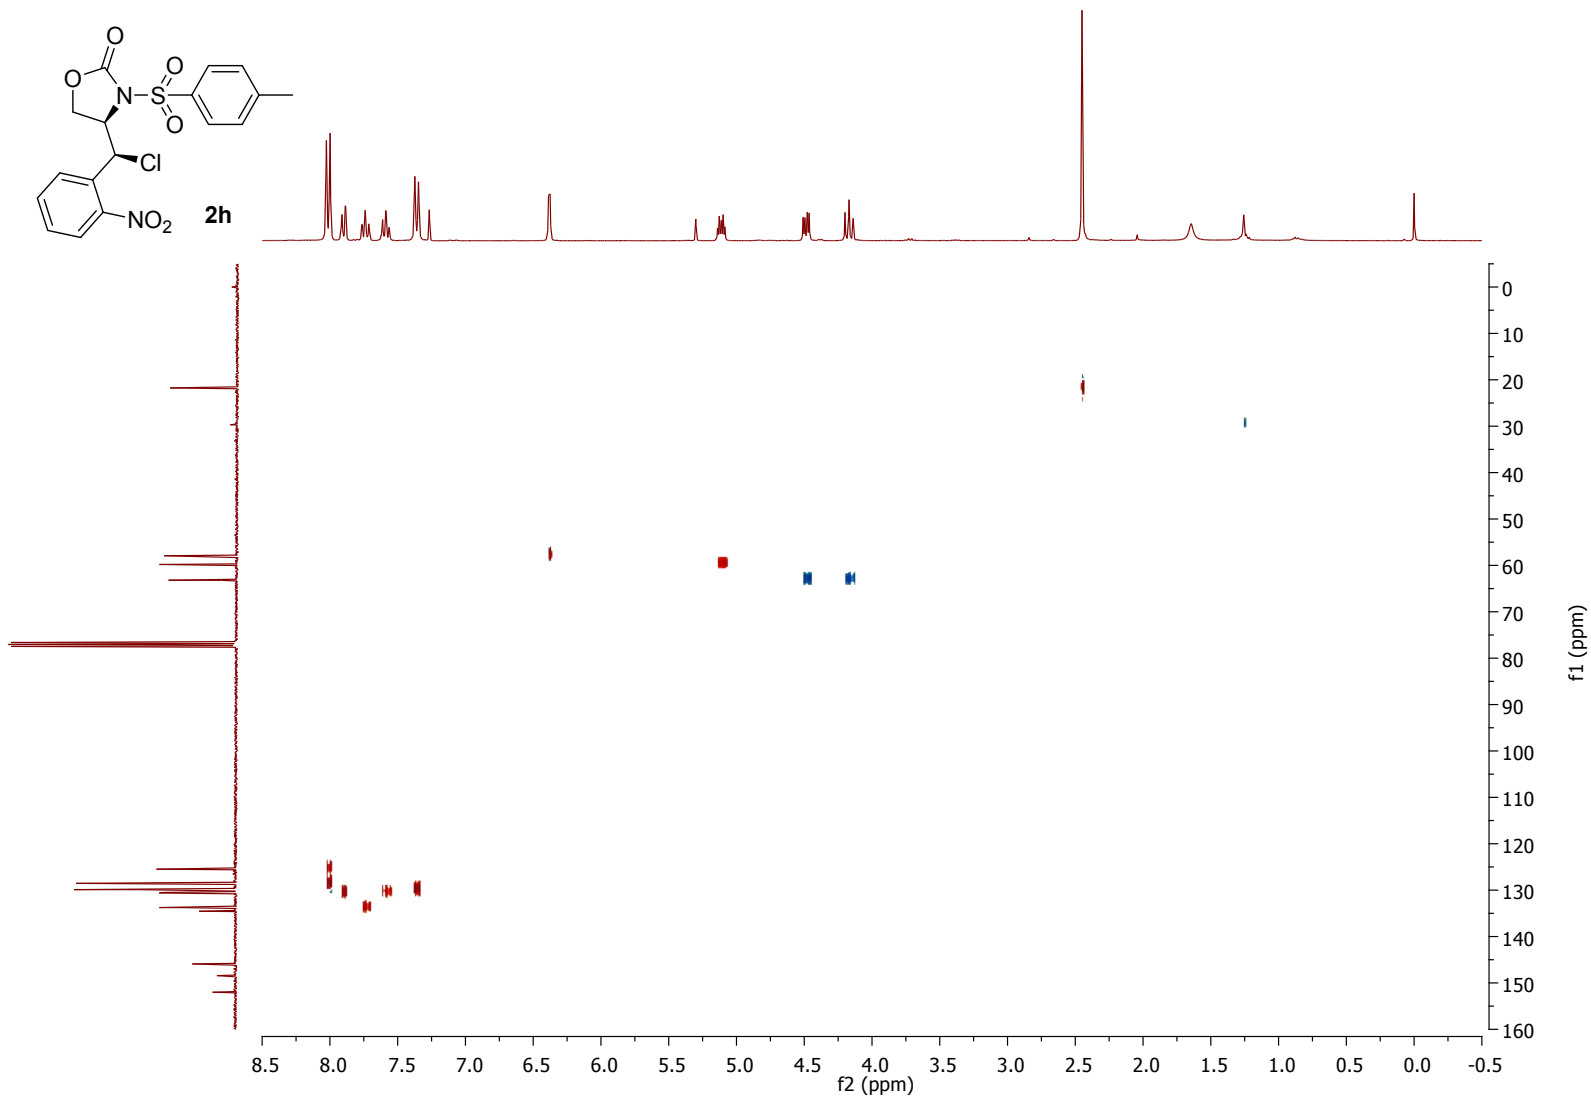

<sup>1</sup>H NMR (300 MHz, CDCl<sub>3</sub>) of substrate **2i**

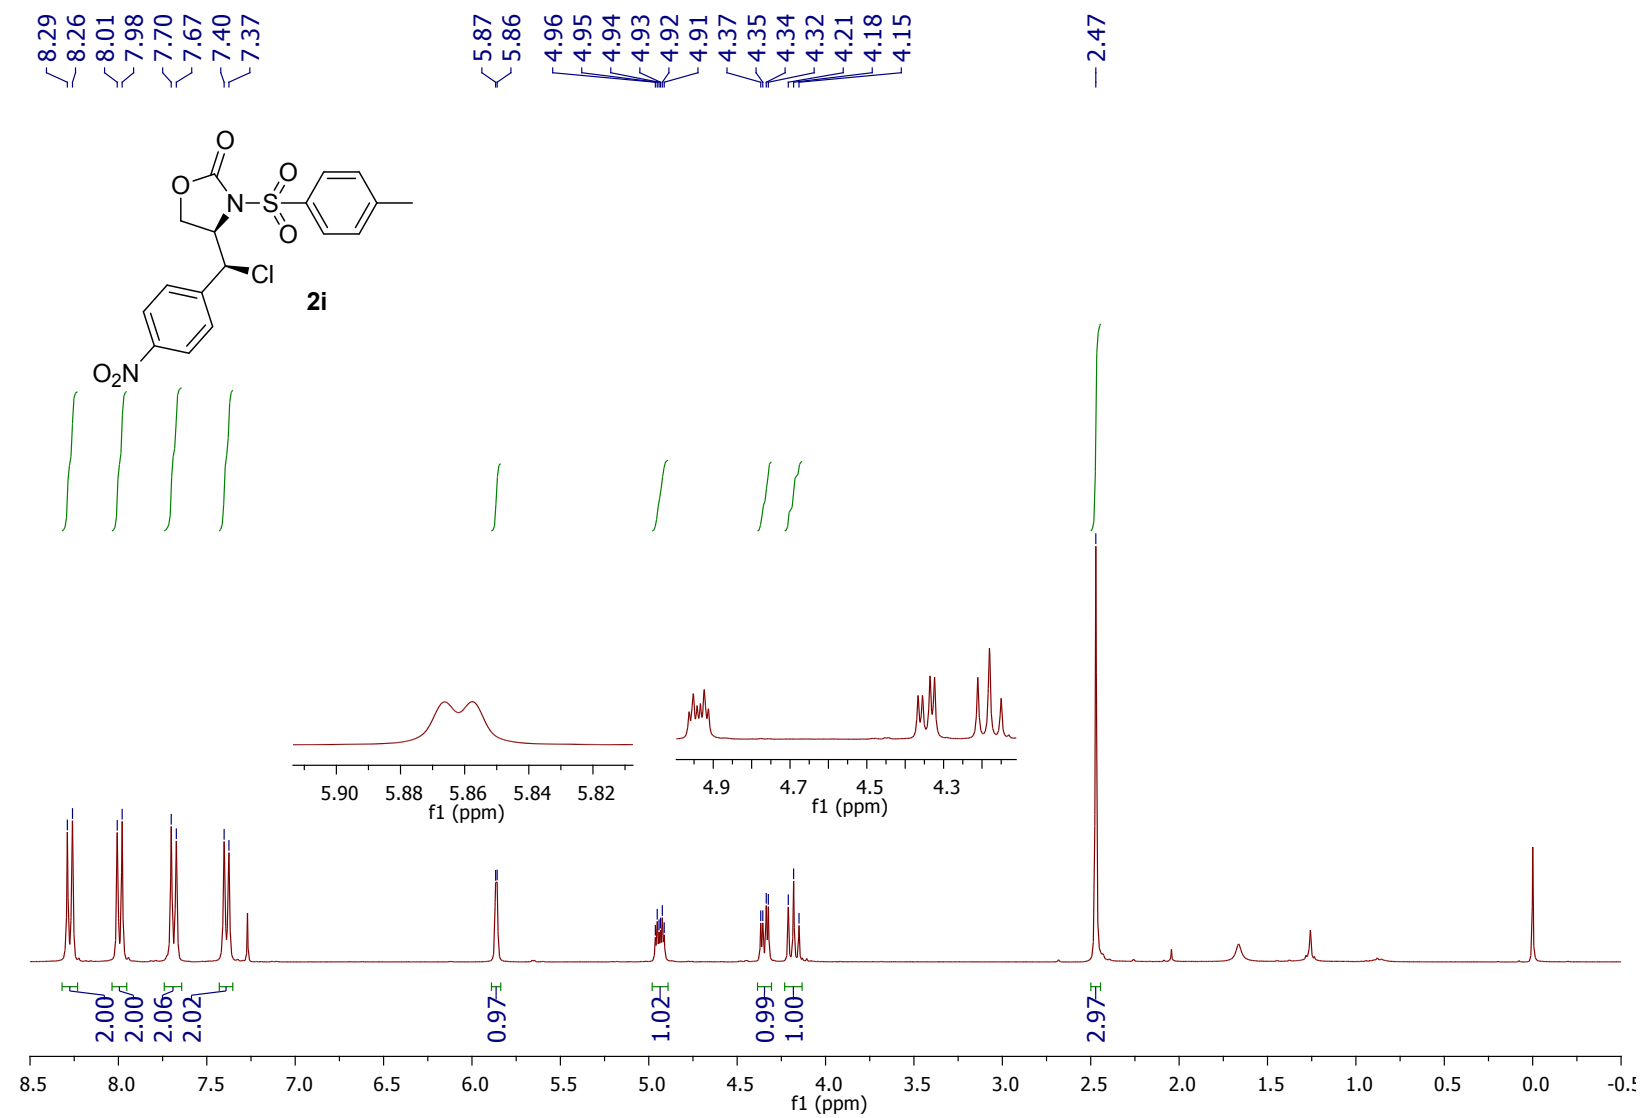

<sup>13</sup>C NMR (75 MHz, CDCl<sub>3</sub>) of substrate **2i**

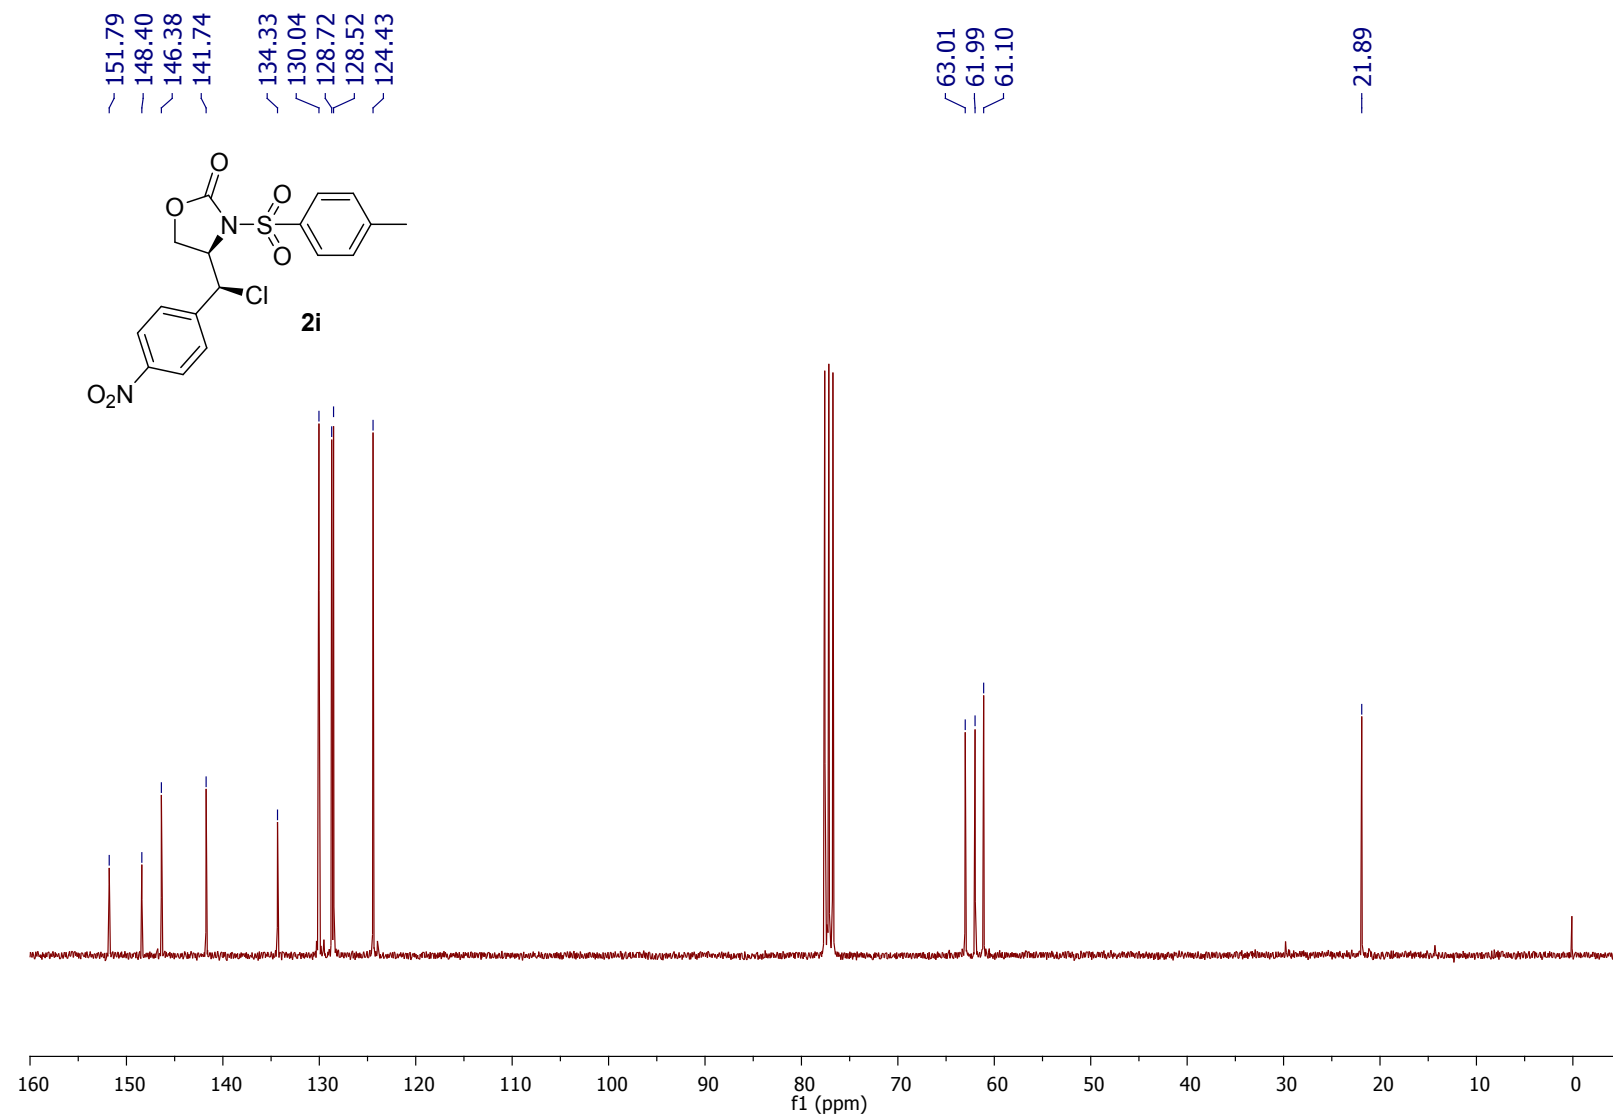

COSY of substrate **2i**

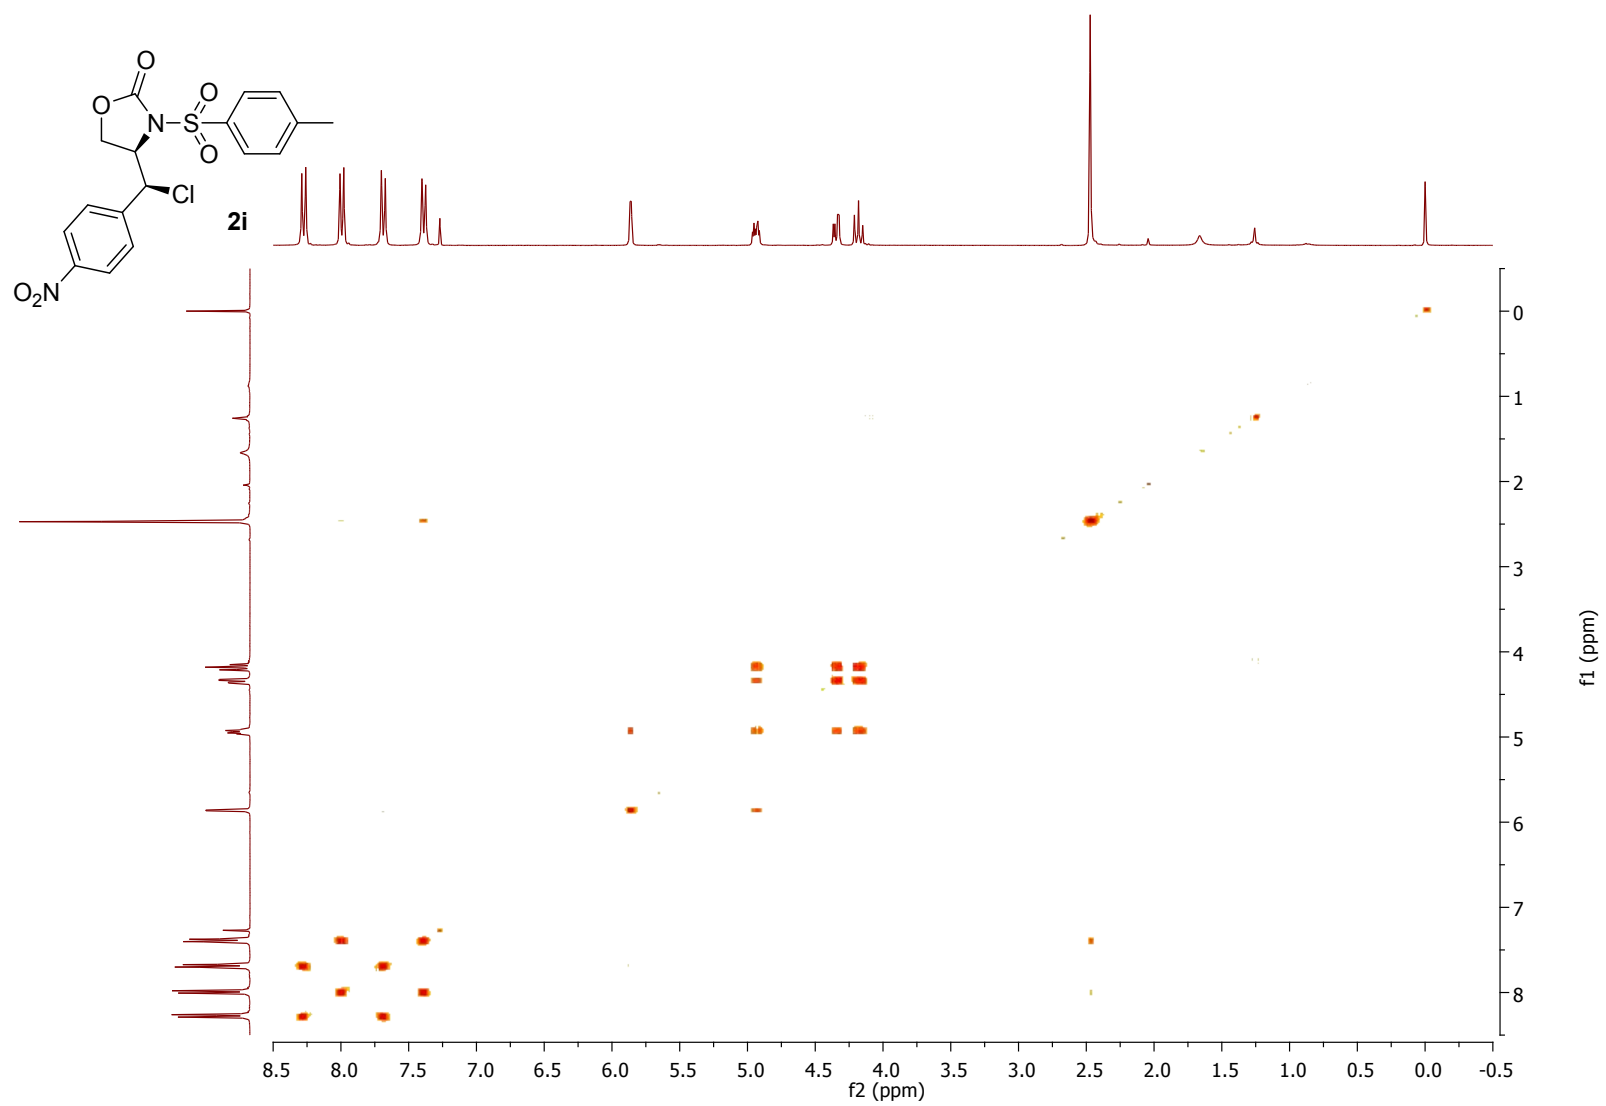

HSQC of substrate **2i**

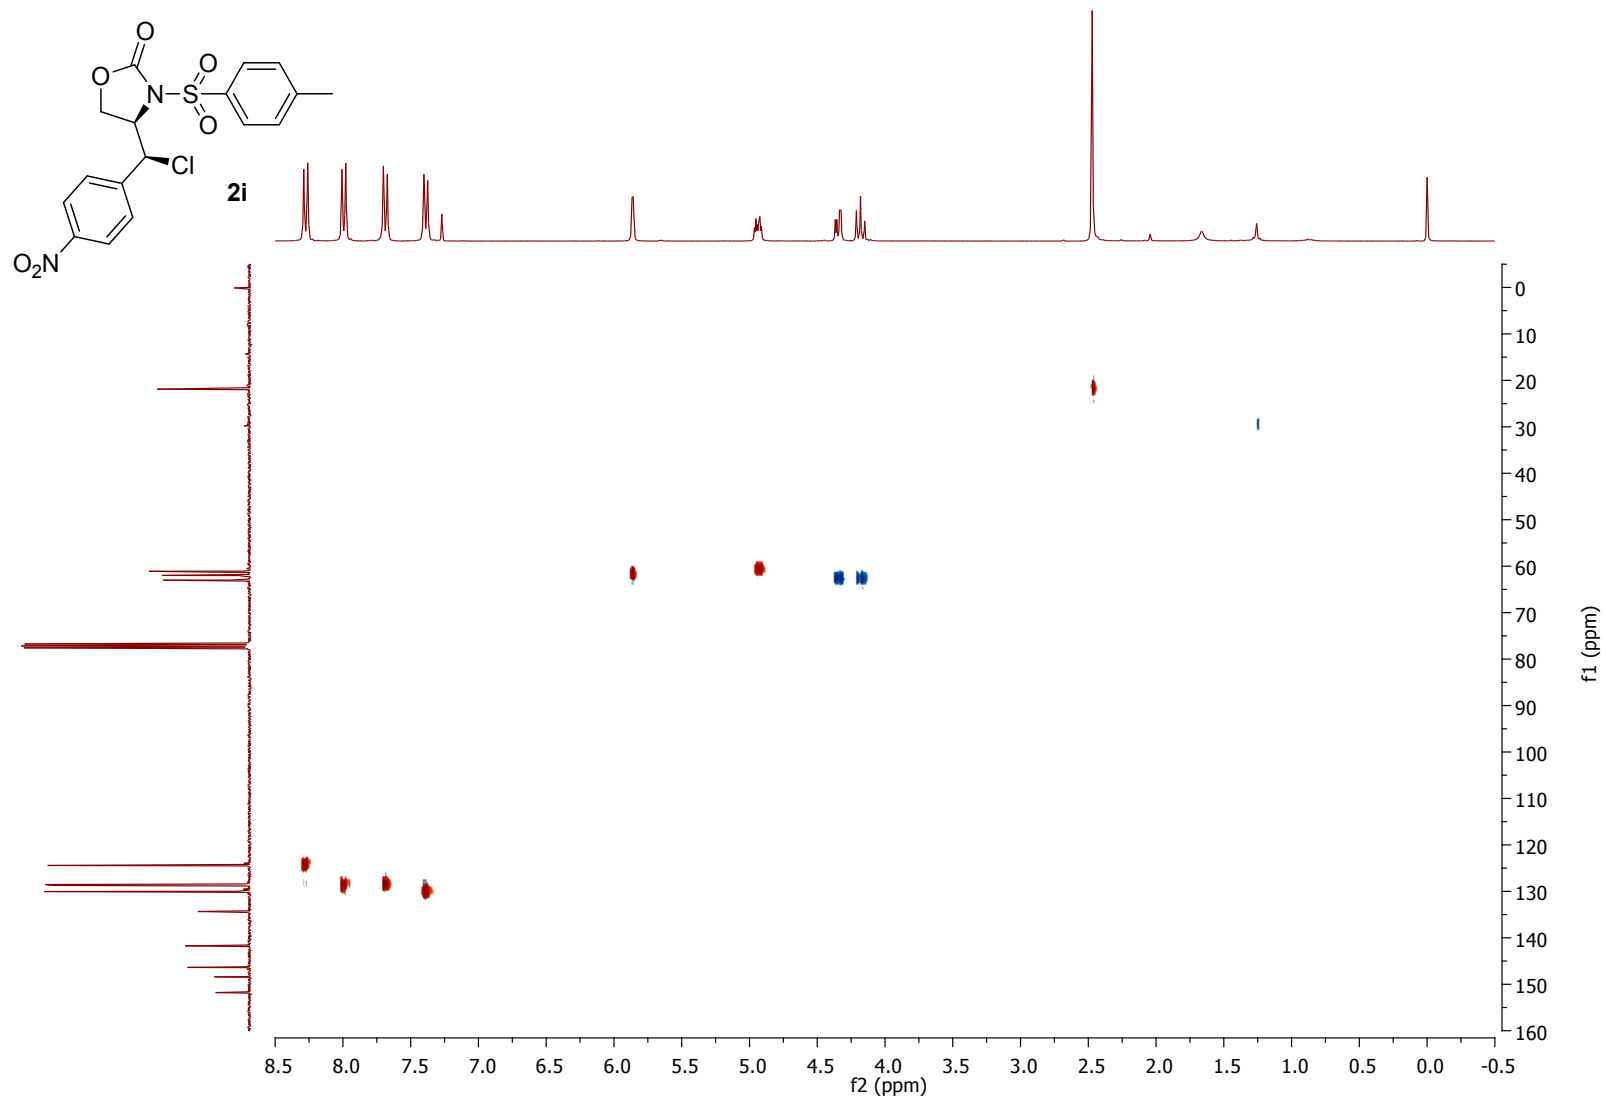

$^1\text{H}$  NMR (300 MHz,  $\text{CDCl}_3$ ) of substrate **2j**

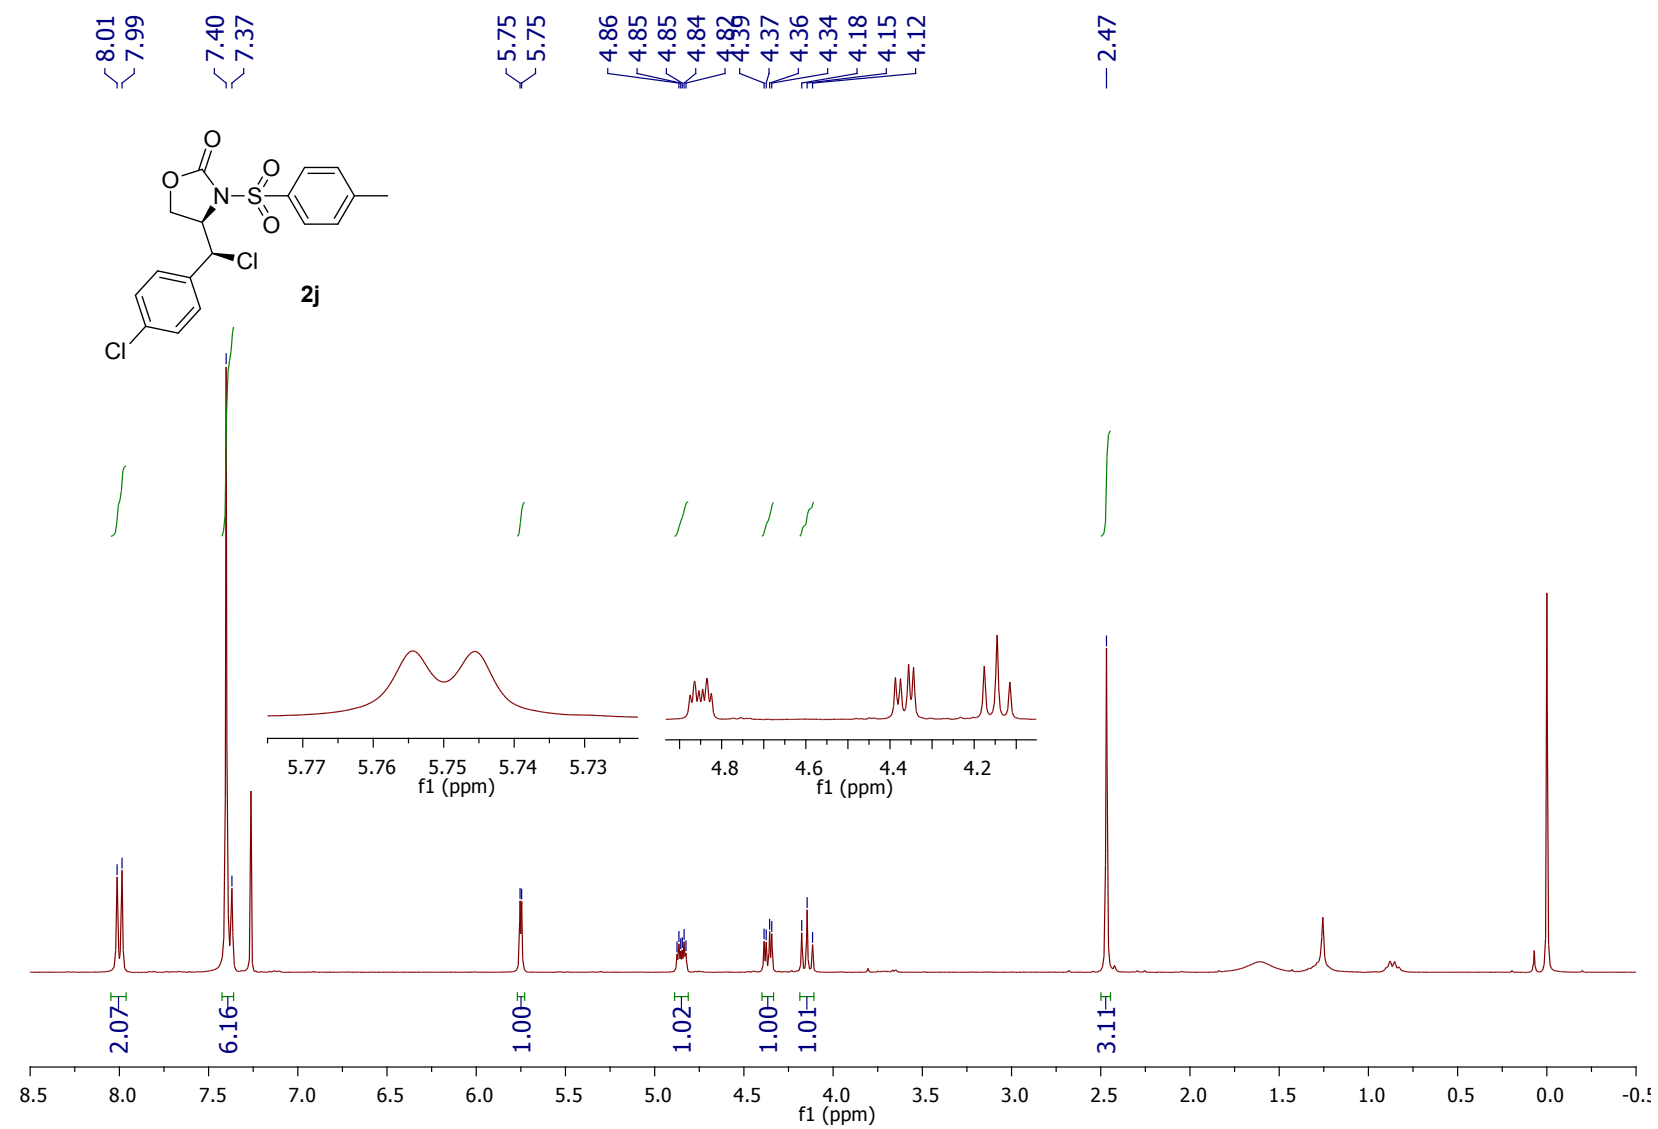

<sup>13</sup>C NMR (75 MHz, CDCl<sub>3</sub>) of substrate **2j**

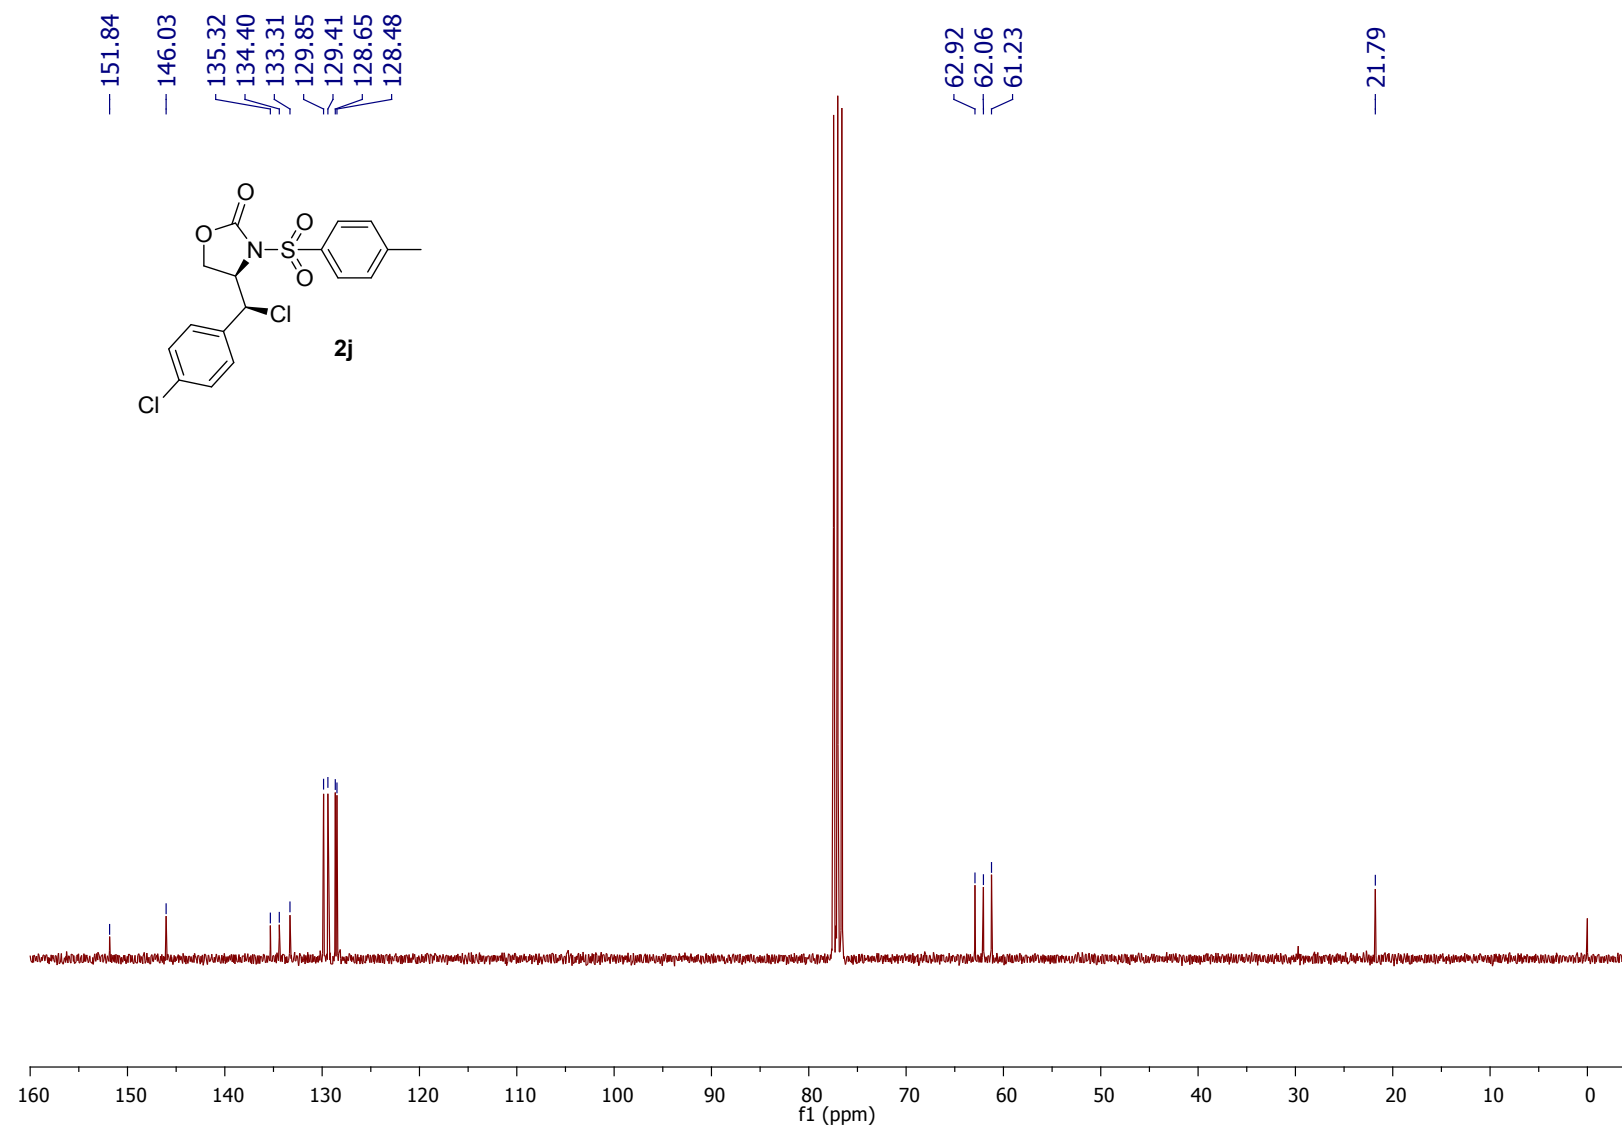

COSY of substrate **2j**

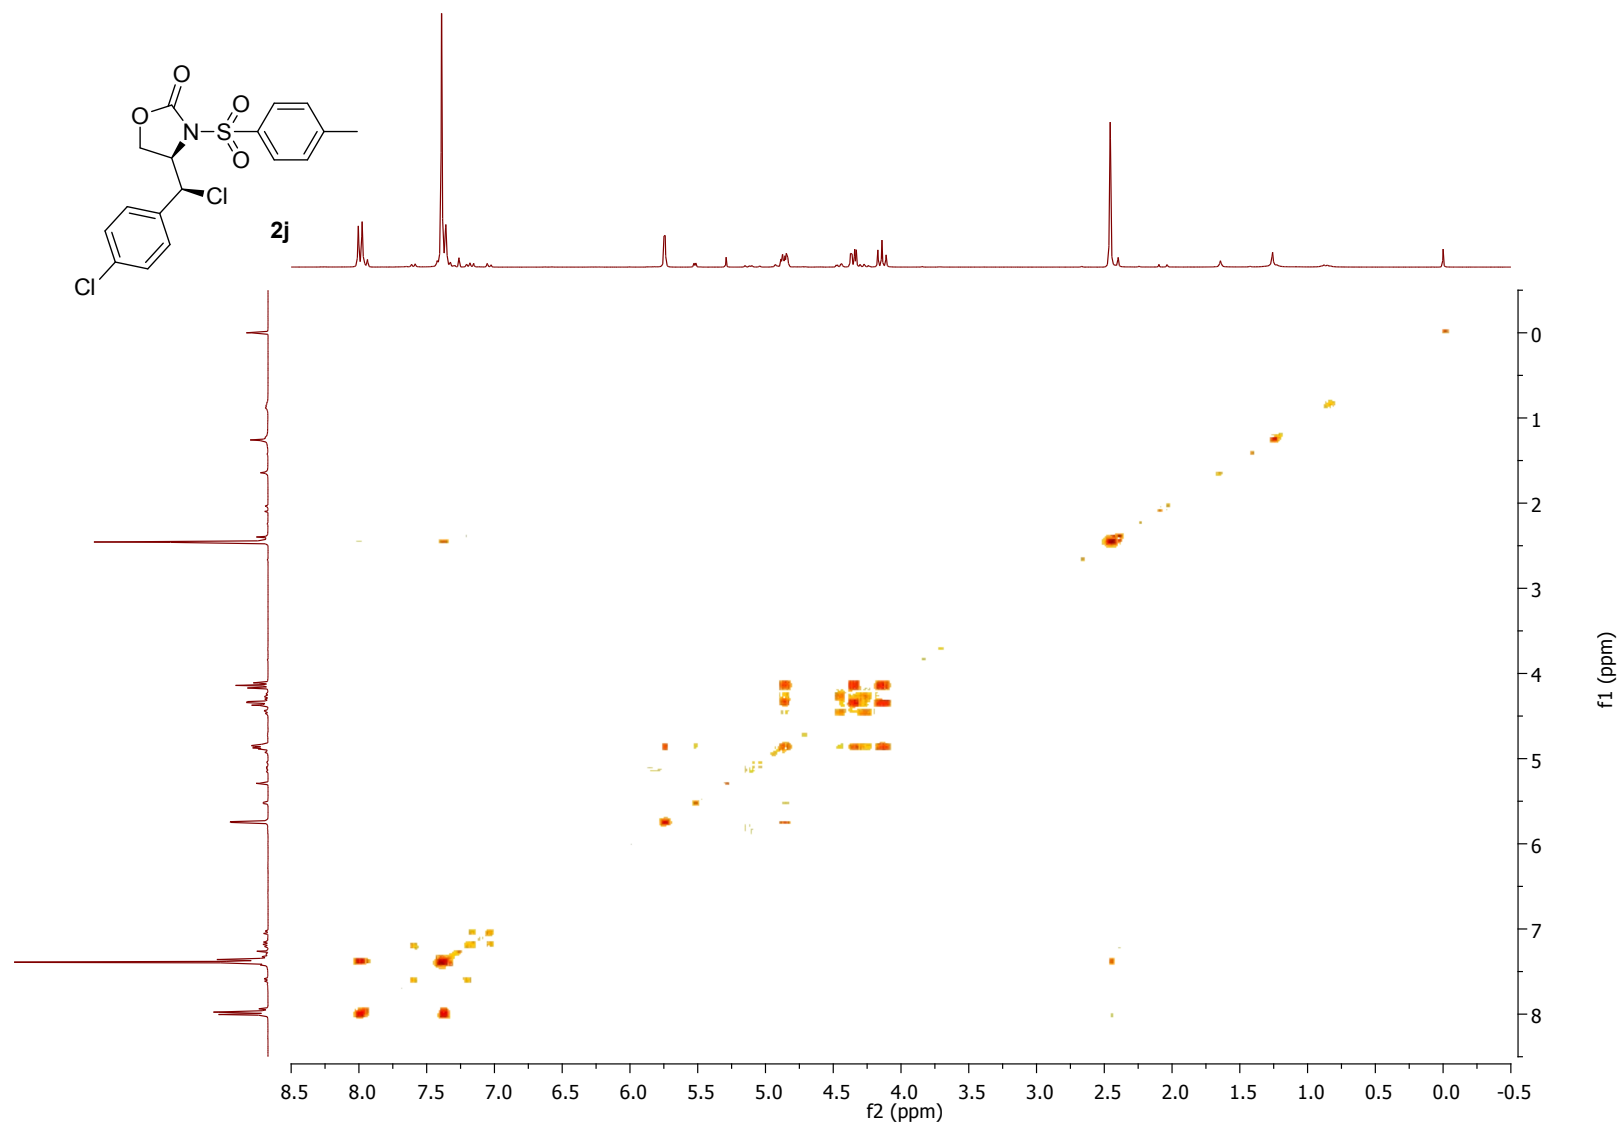



HSQC of substrate **2j**

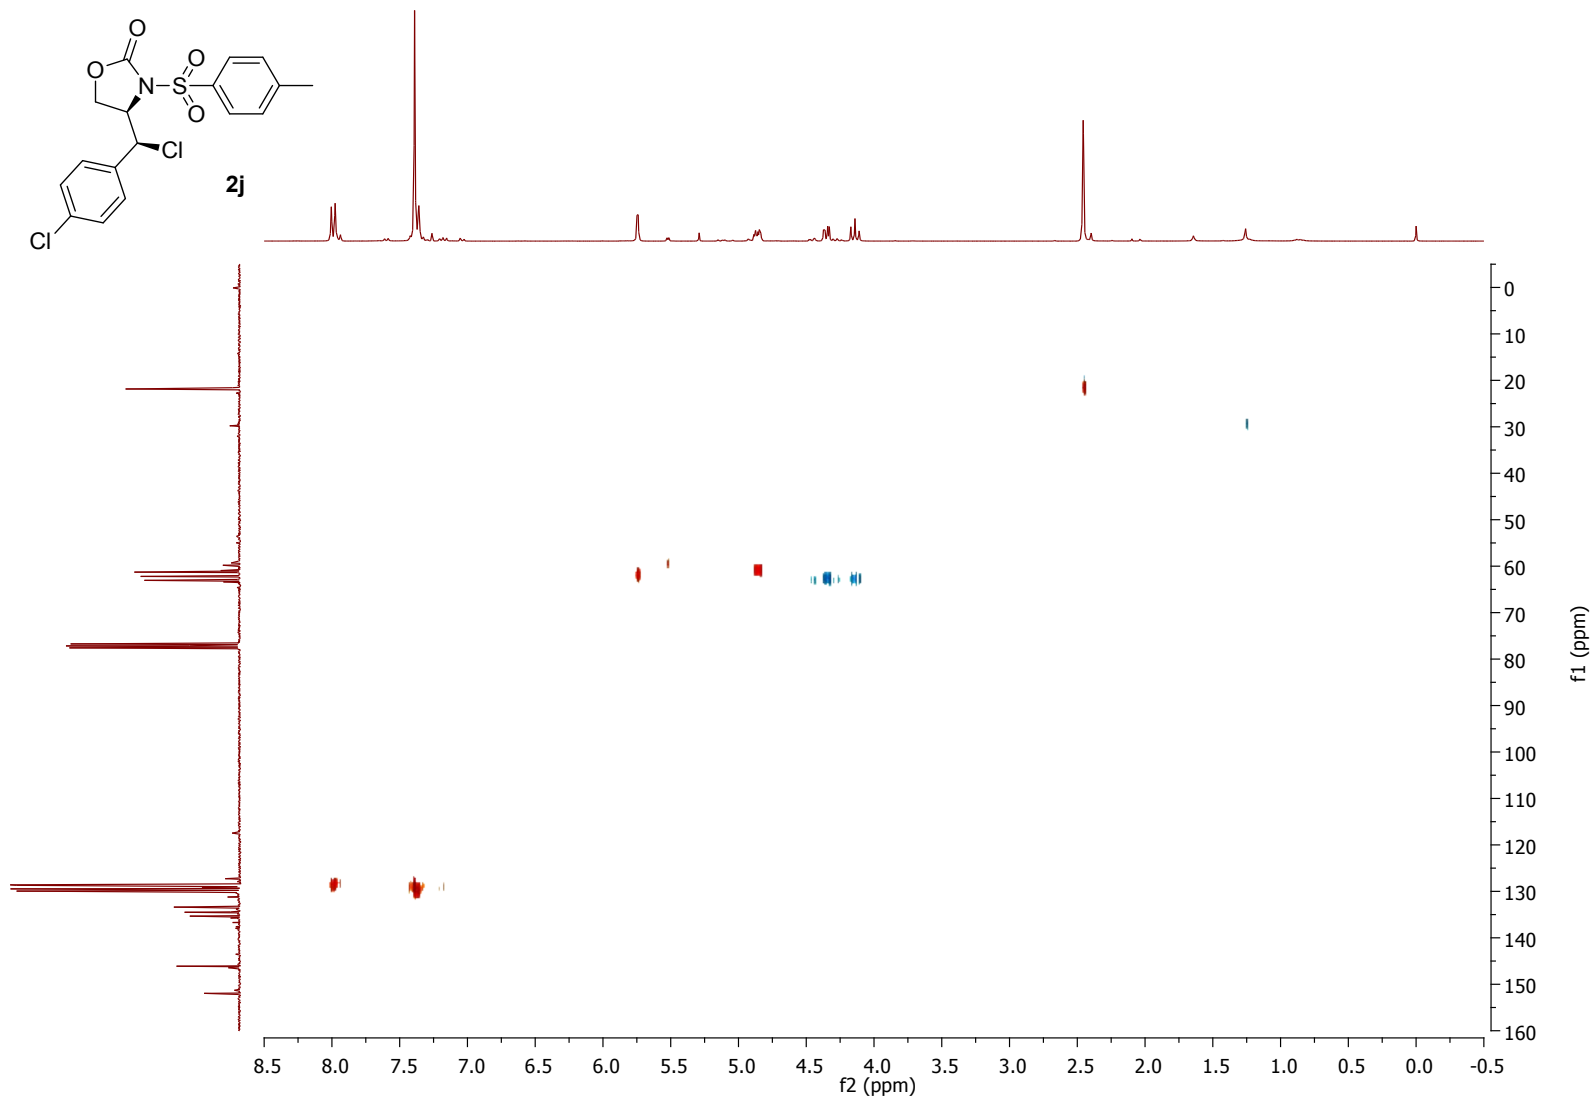

<sup>1</sup>H NMR (300 MHz, CDCl<sub>3</sub>) of substrate **2m**

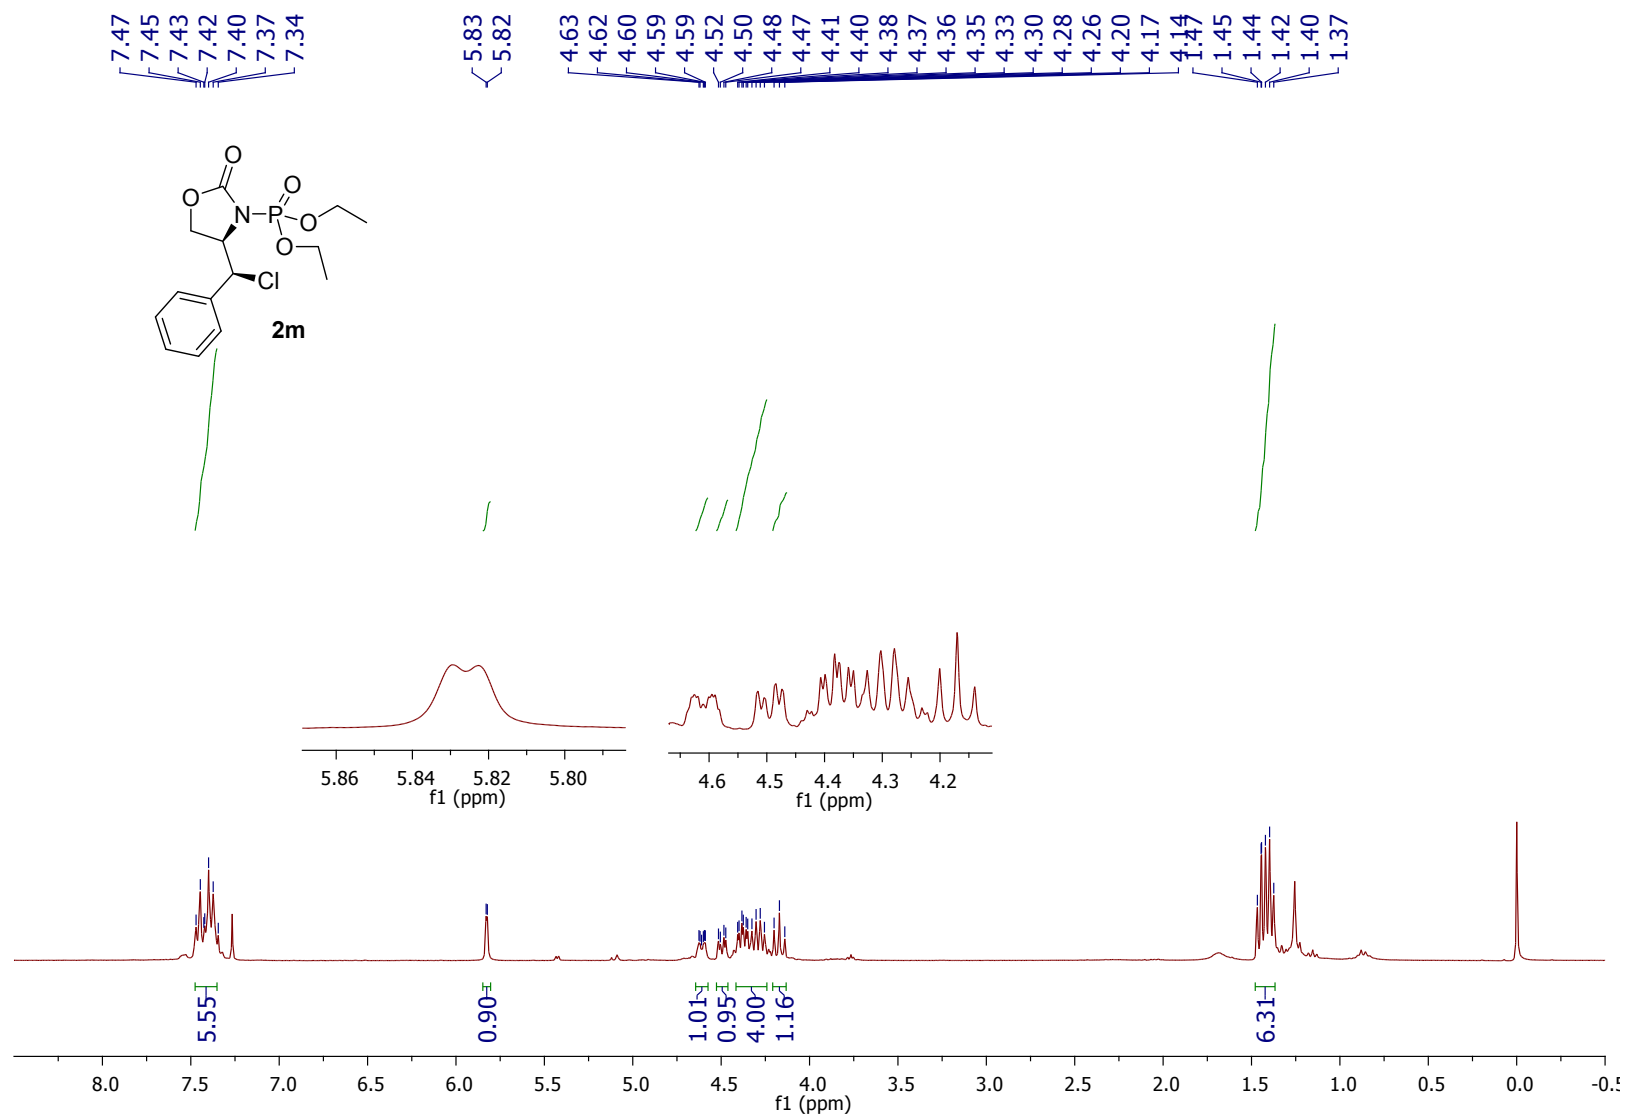

$^{13}\text{C}$  NMR (75 MHz,  $\text{CDCl}_3$ ) of substrate **2m**

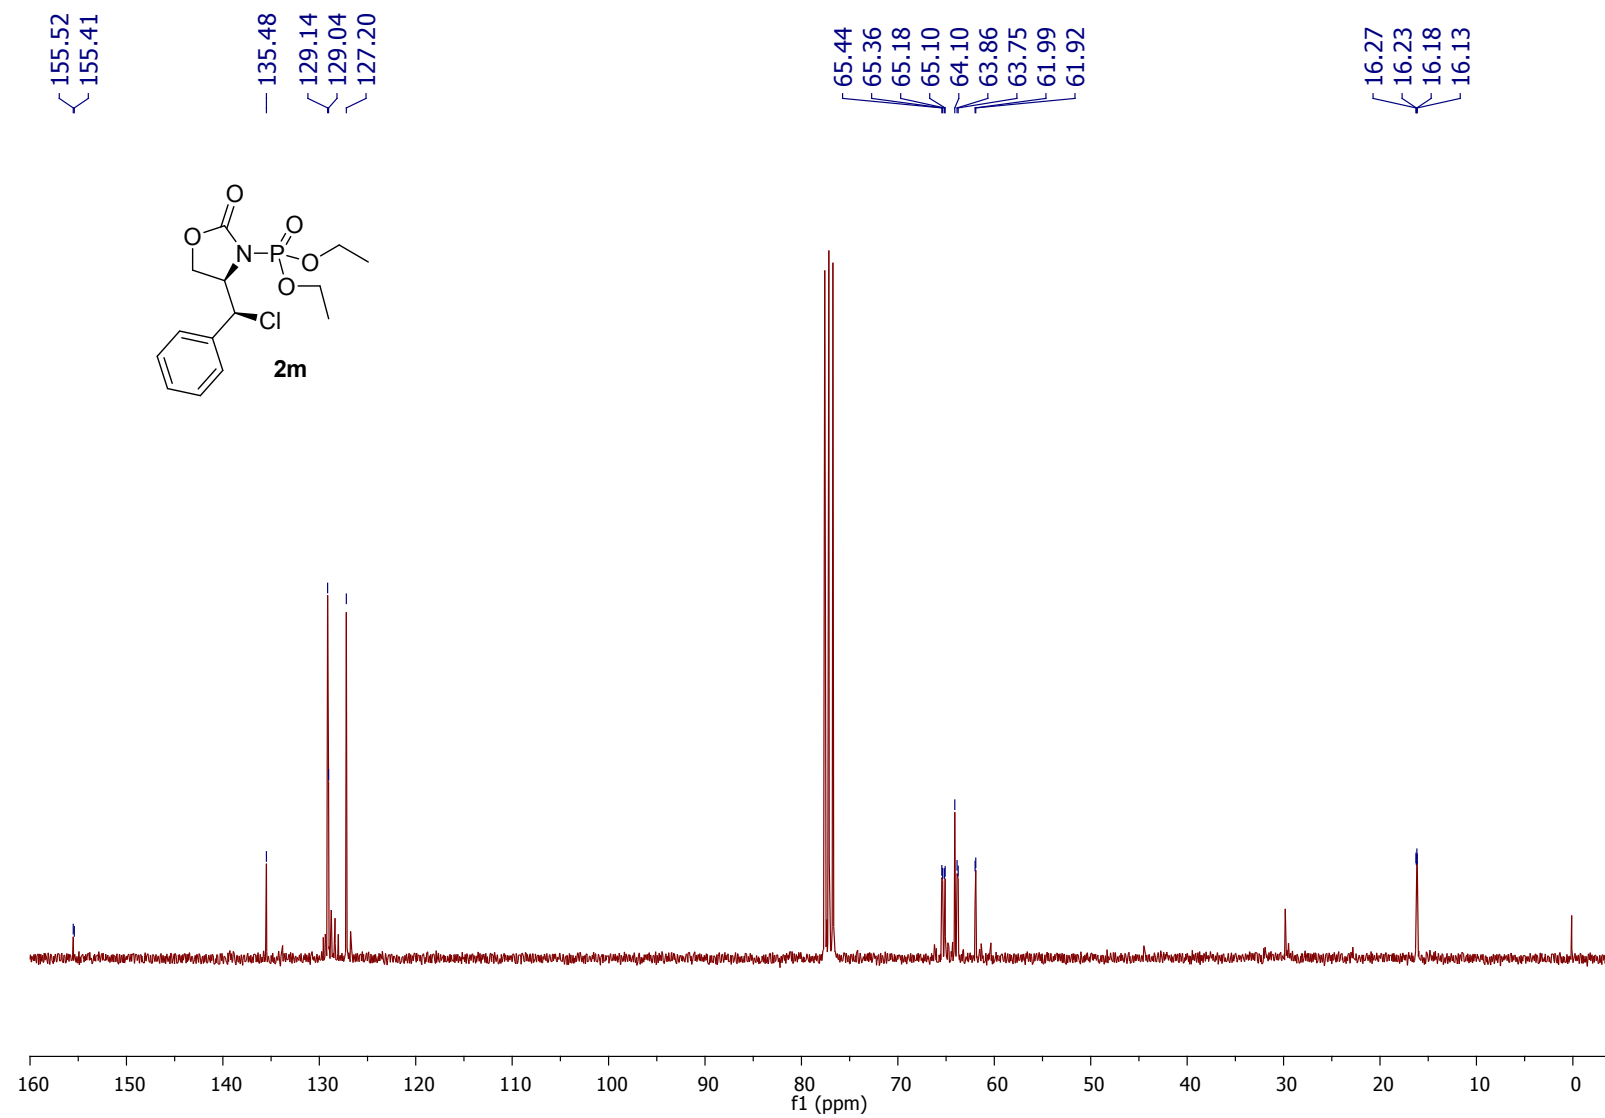

COSY of substrate **2m**

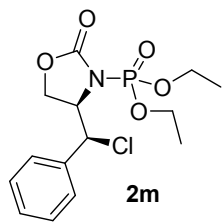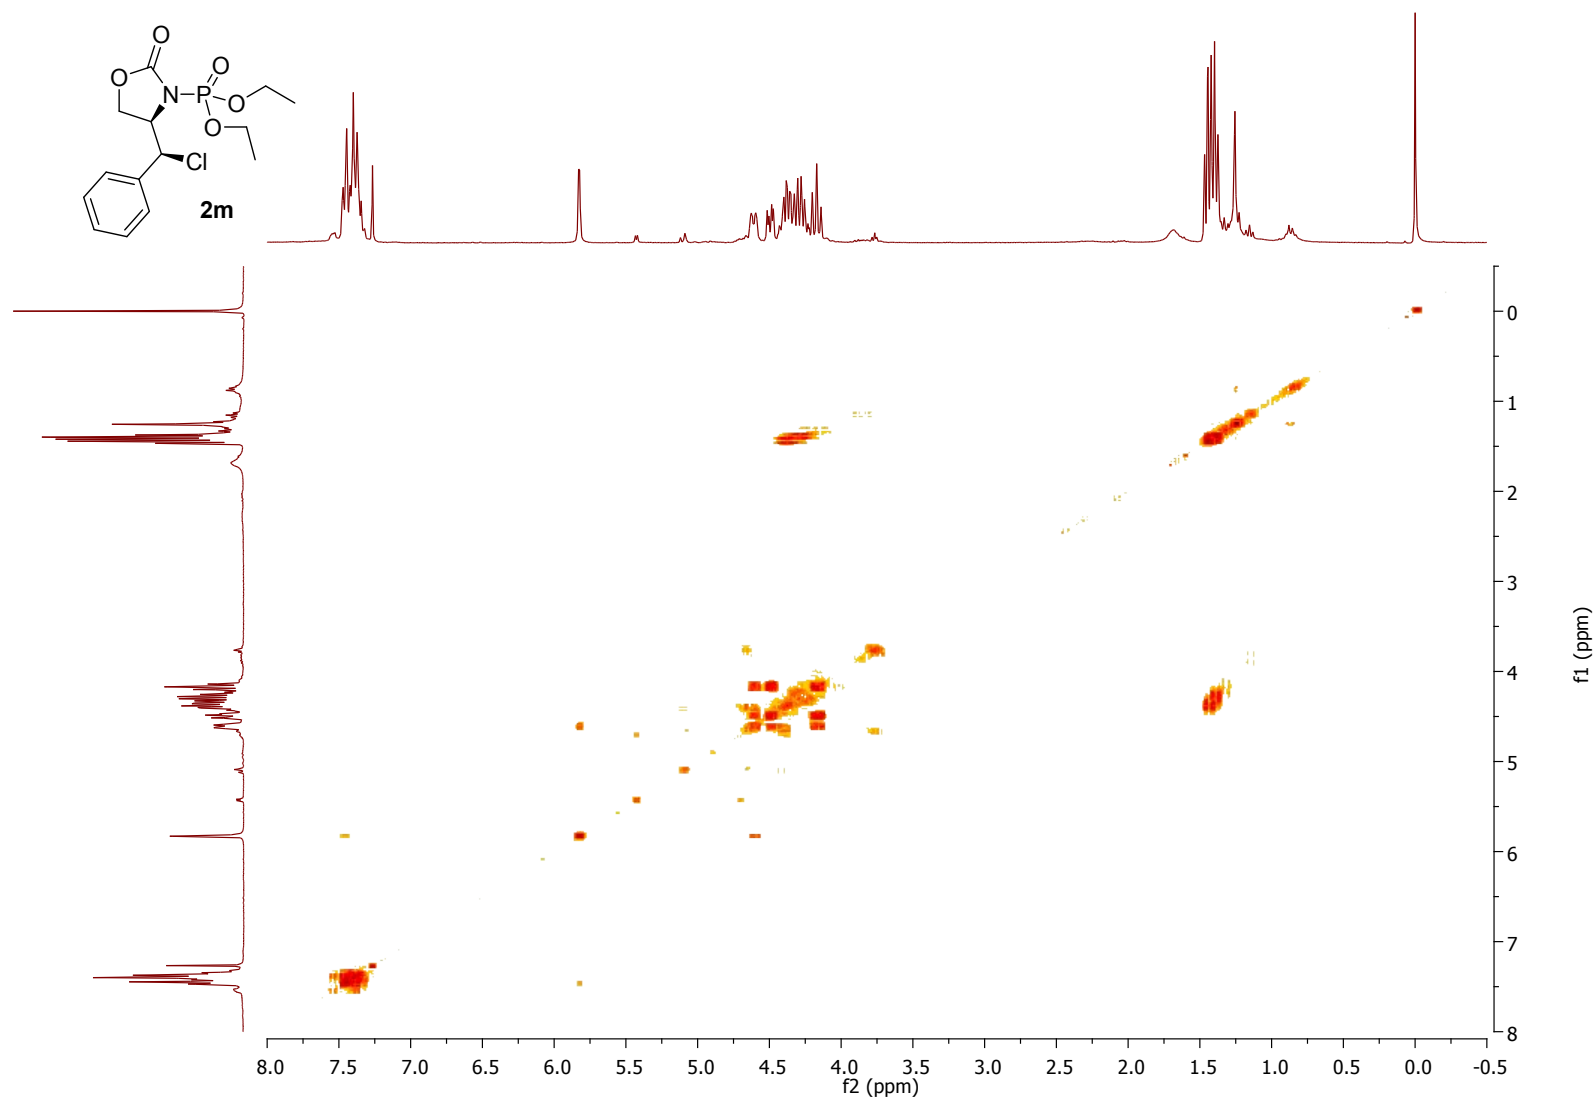

HSQC of substrate **2m**

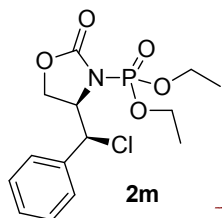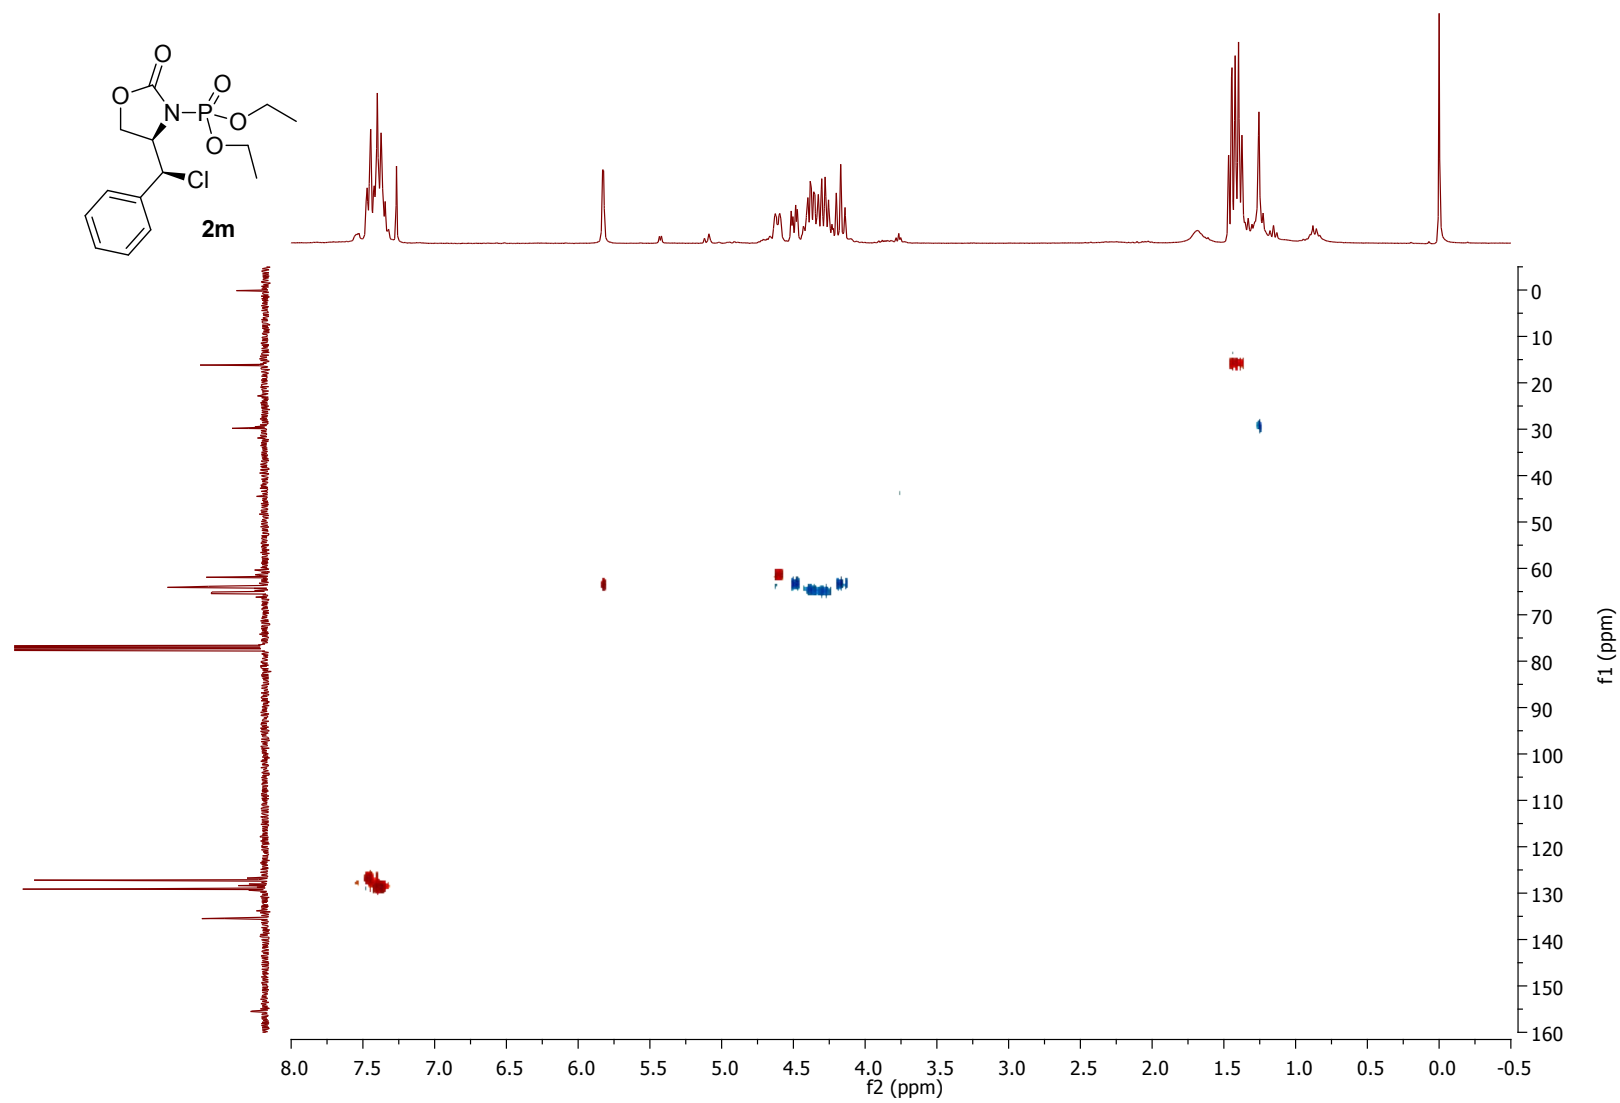

<sup>1</sup>H NMR (300 MHz, CDCl<sub>3</sub>) of substrate **2n**

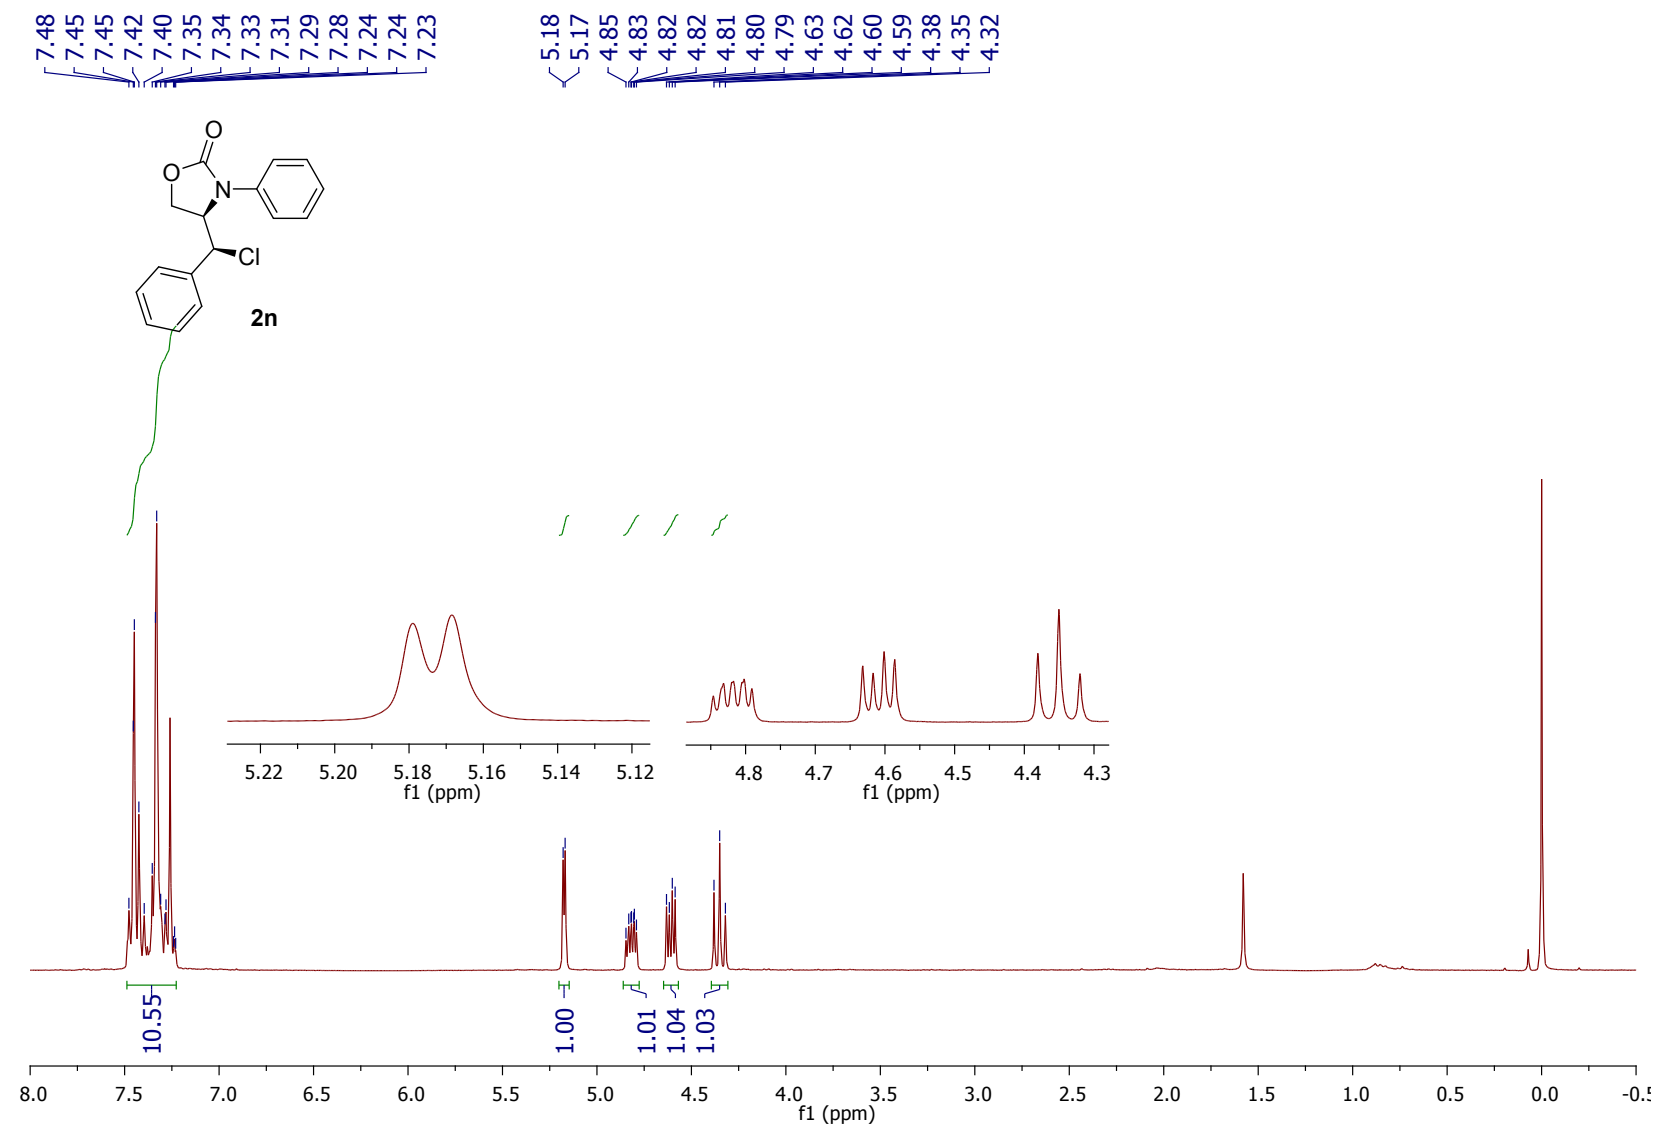

$^{13}\text{C}$  NMR (75 MHz,  $\text{CDCl}_3$ ) of substrate **2n**

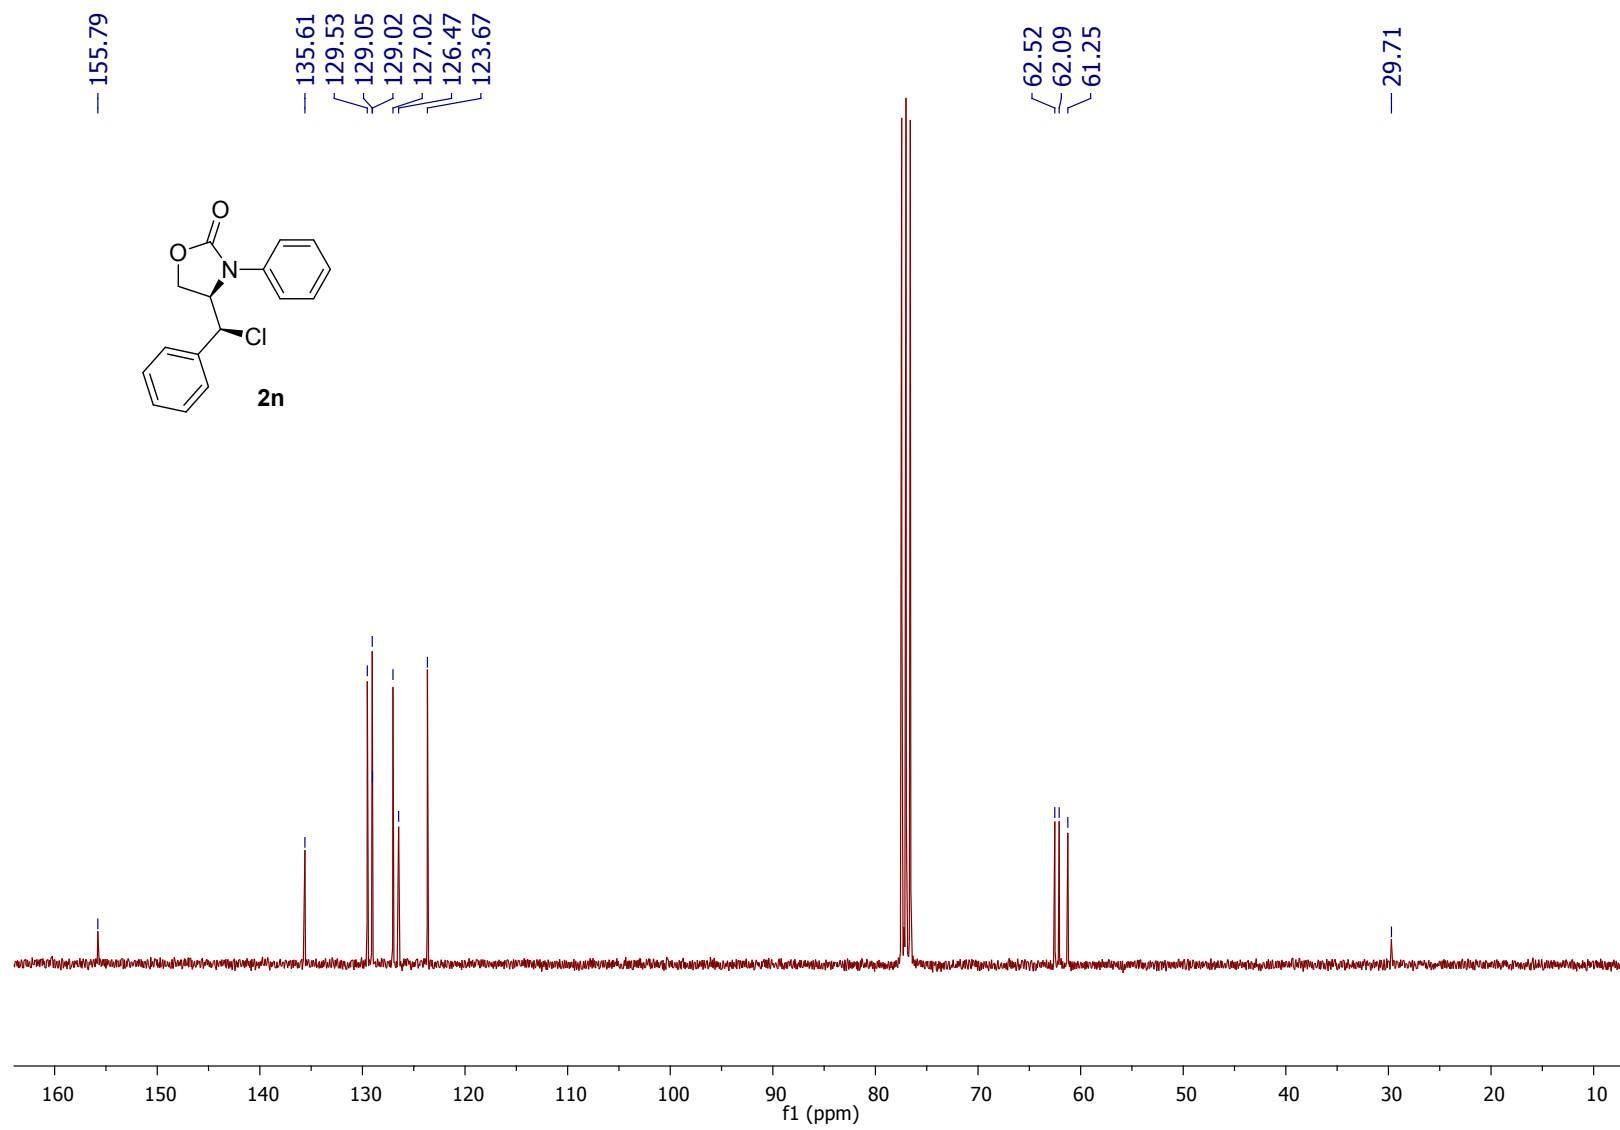

COSY of substrate **2n**

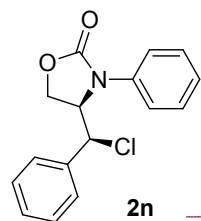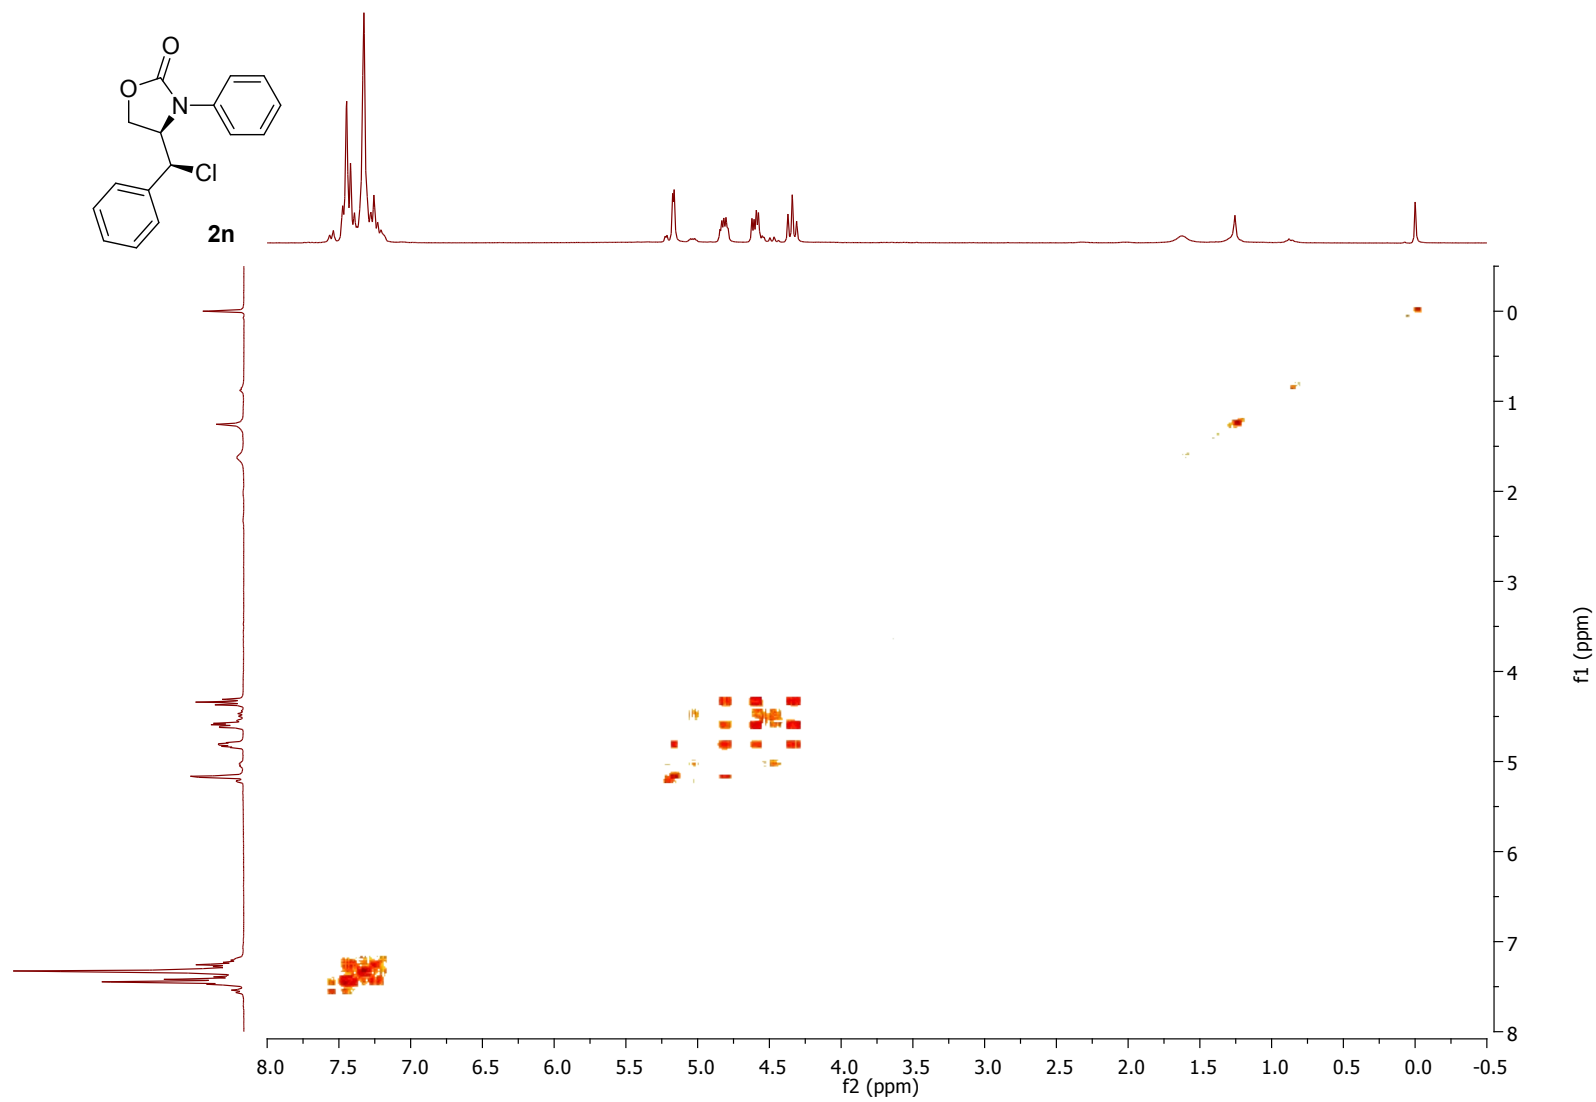



HSQC of substrate **2n**

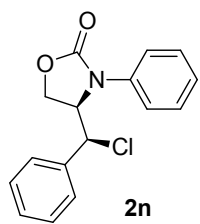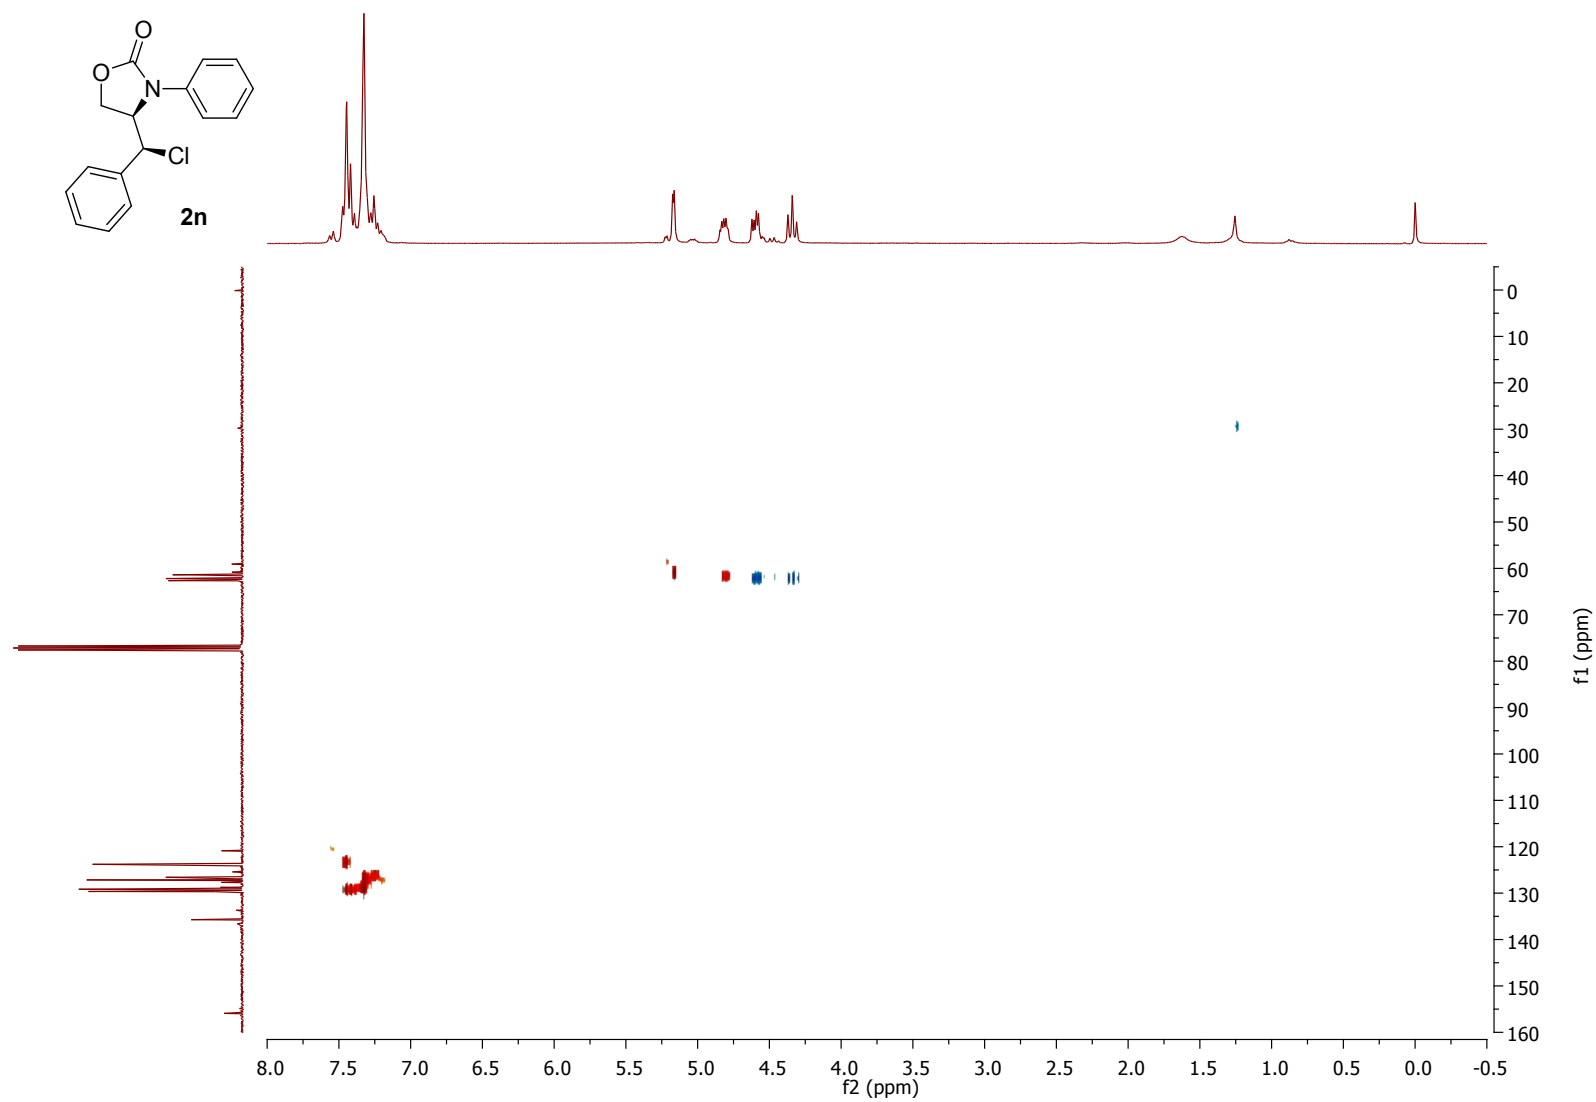

<sup>1</sup>H NMR (300 MHz, CDCl<sub>3</sub>) of substrate **2o**

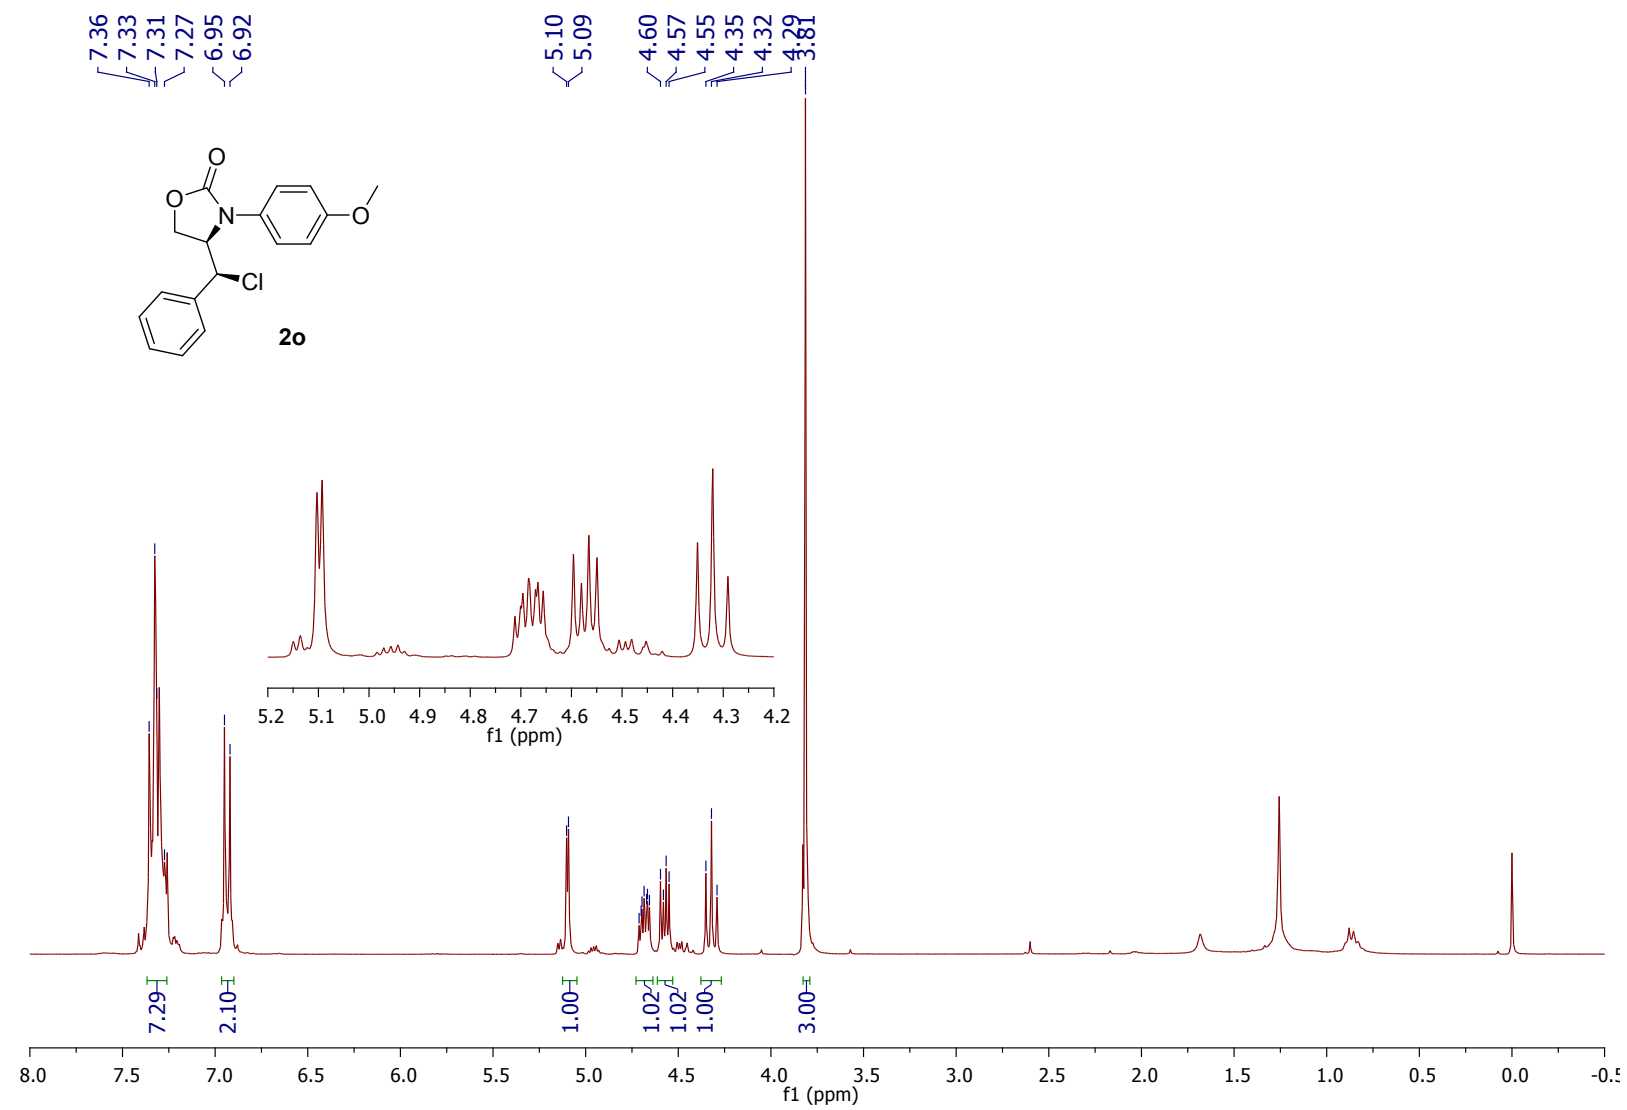

$^{13}\text{C}$  NMR (75 MHz,  $\text{CDCl}_3$ ) of substrate **2o**

158.44  
156.43

135.79  
129.10  
129.05  
128.30  
127.15  
126.32  
114.93

62.92  
62.70  
61.64  
55.63

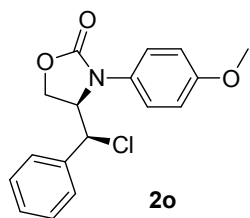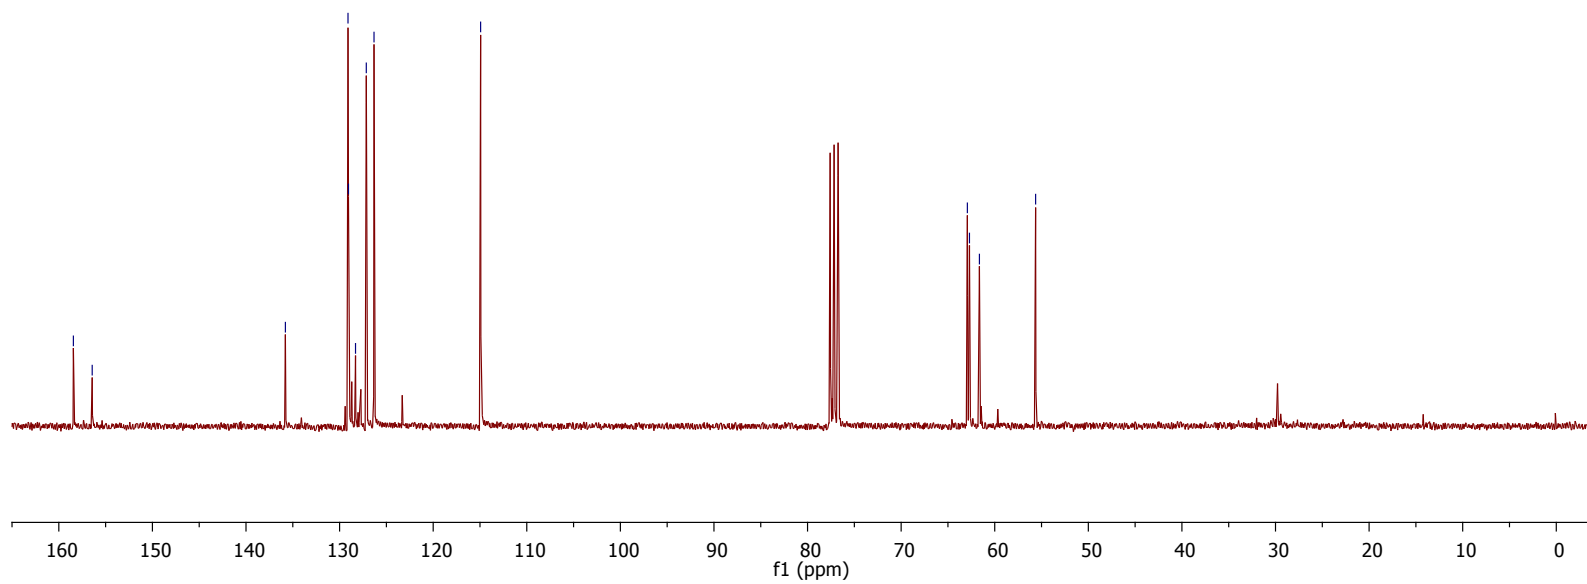

COSY of substrate **2o**

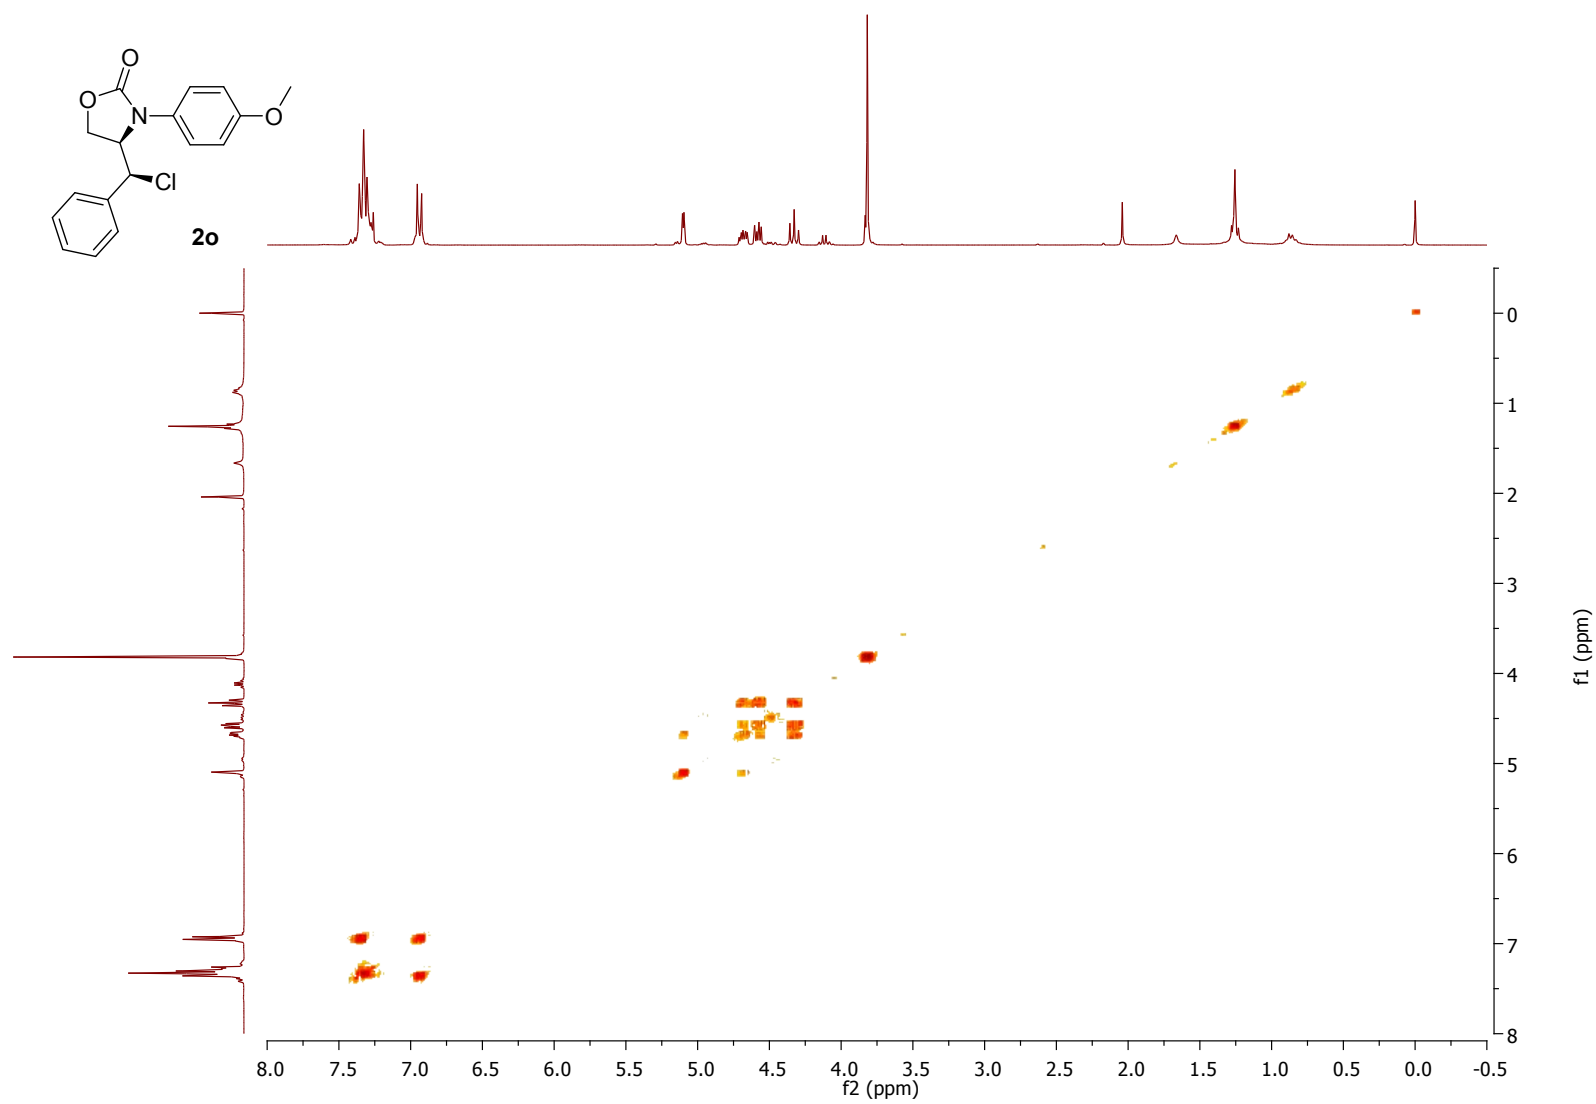

HSQC of substrate **2o**

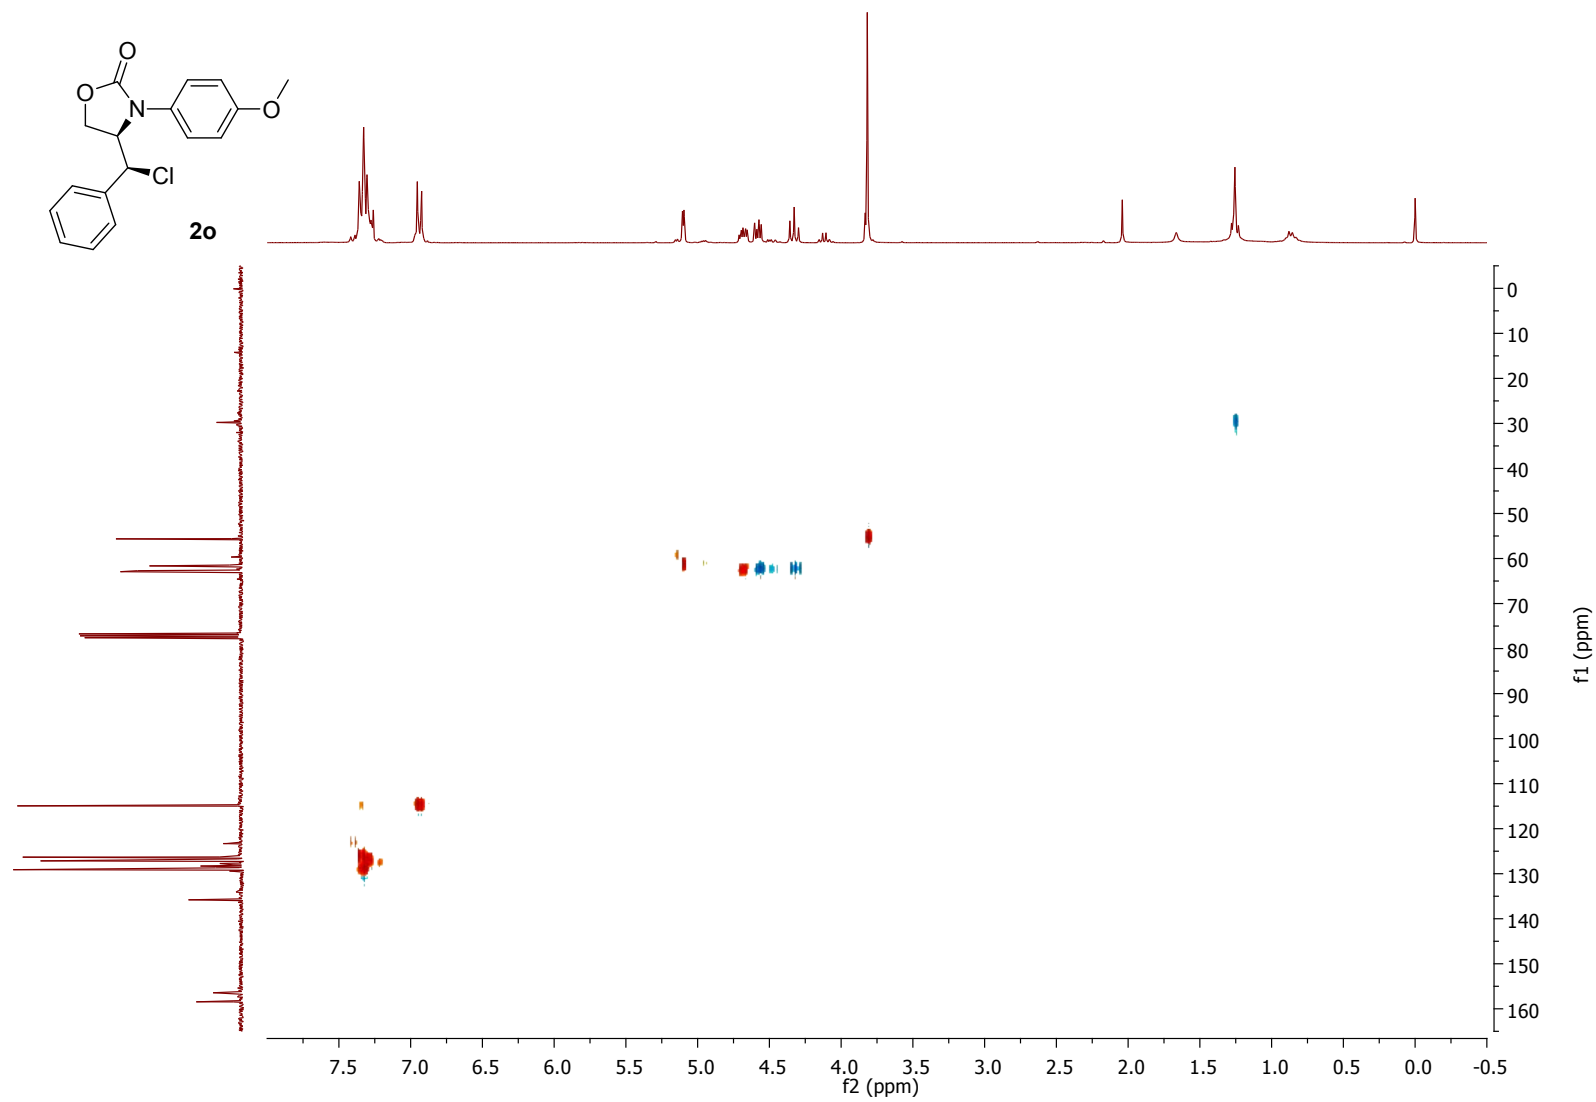

$^1\text{H}$  NMR (300 MHz,  $\text{CDCl}_3$ ) of substrate **2p**

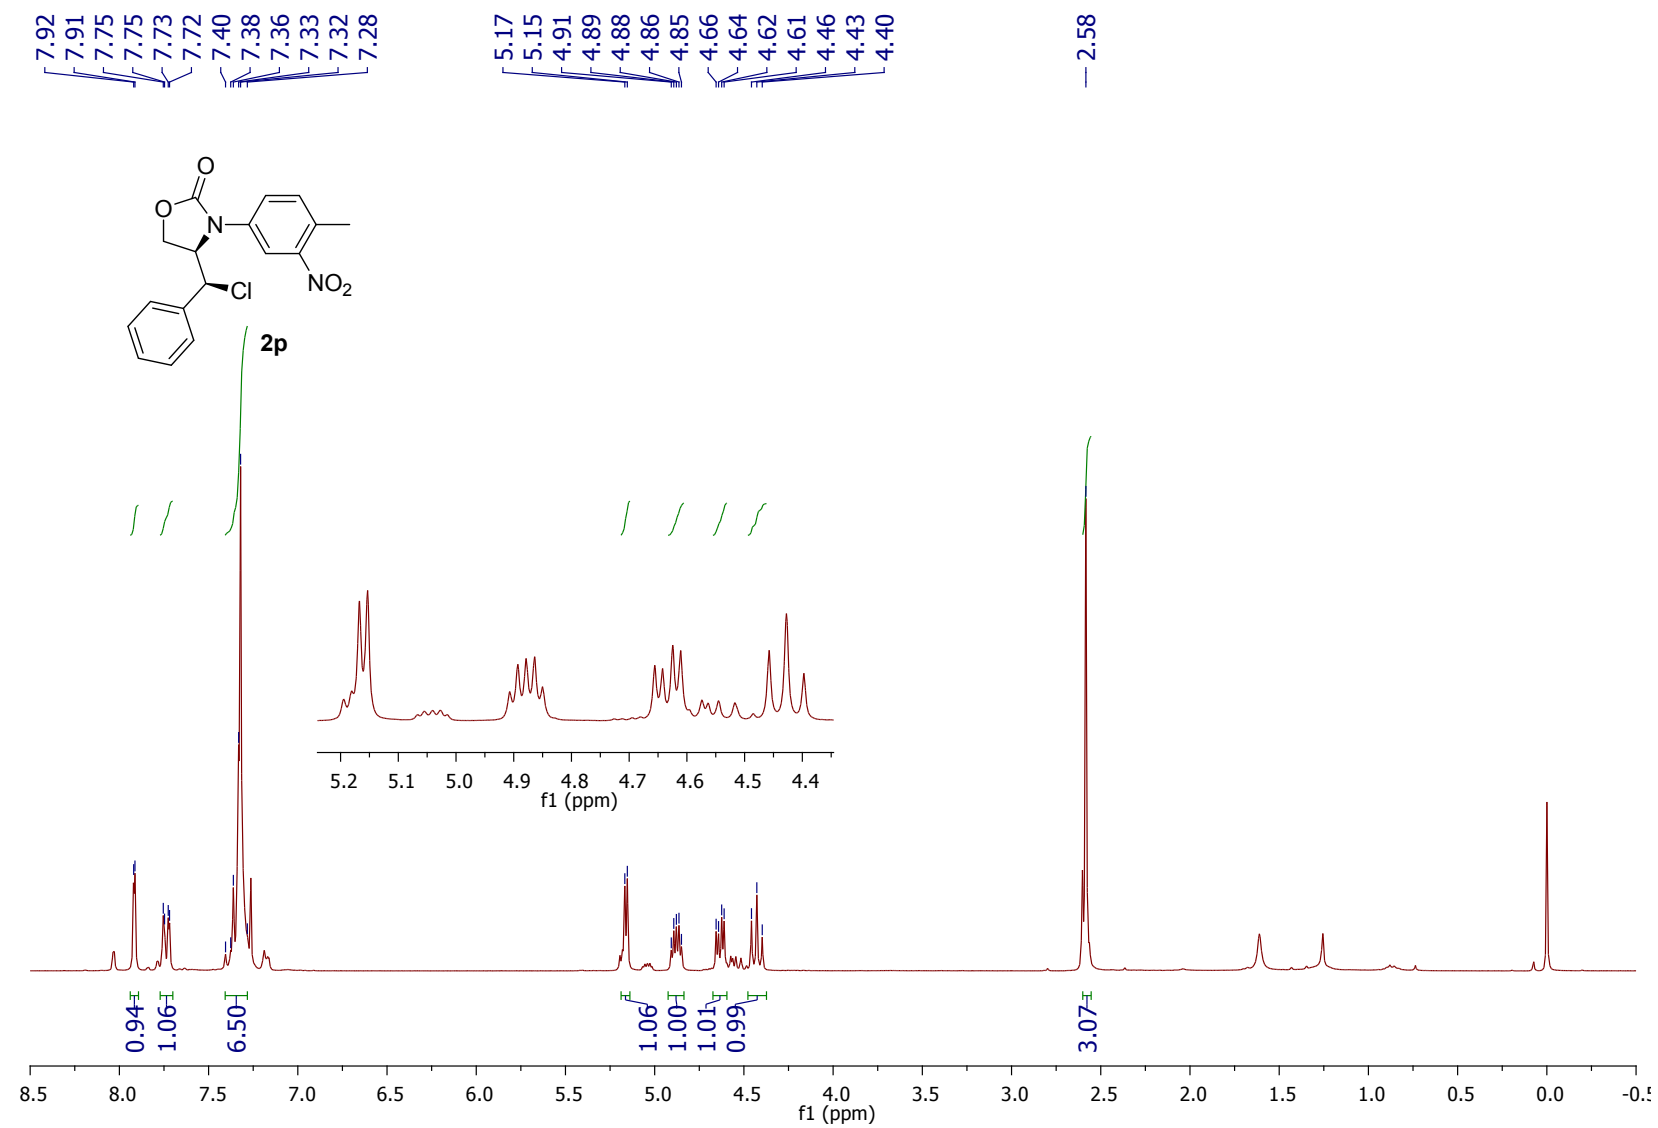

<sup>13</sup>C NMR (75 MHz, CDCl<sub>3</sub>) of substrate **2p**

— 155.28  
— 148.99  
— 135.25  
— 134.80  
— 133.78  
— 131.19  
— 129.22  
— 129.12  
— 127.77  
— 127.19  
— 118.40

— 63.33  
— 61.57  
— 61.23

— 20.14

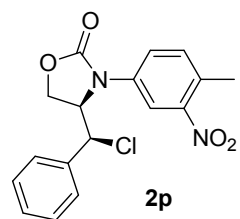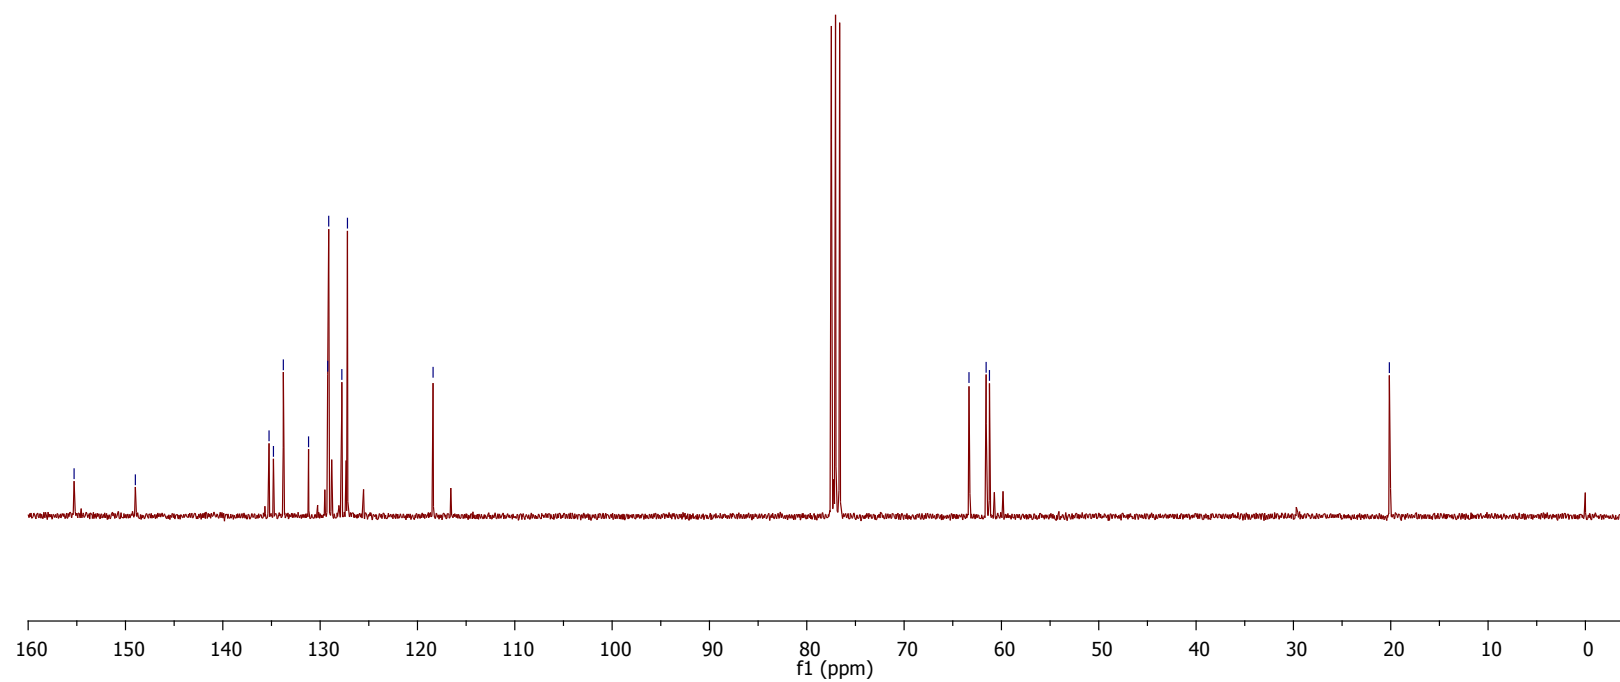

COSY of substrate **2p**

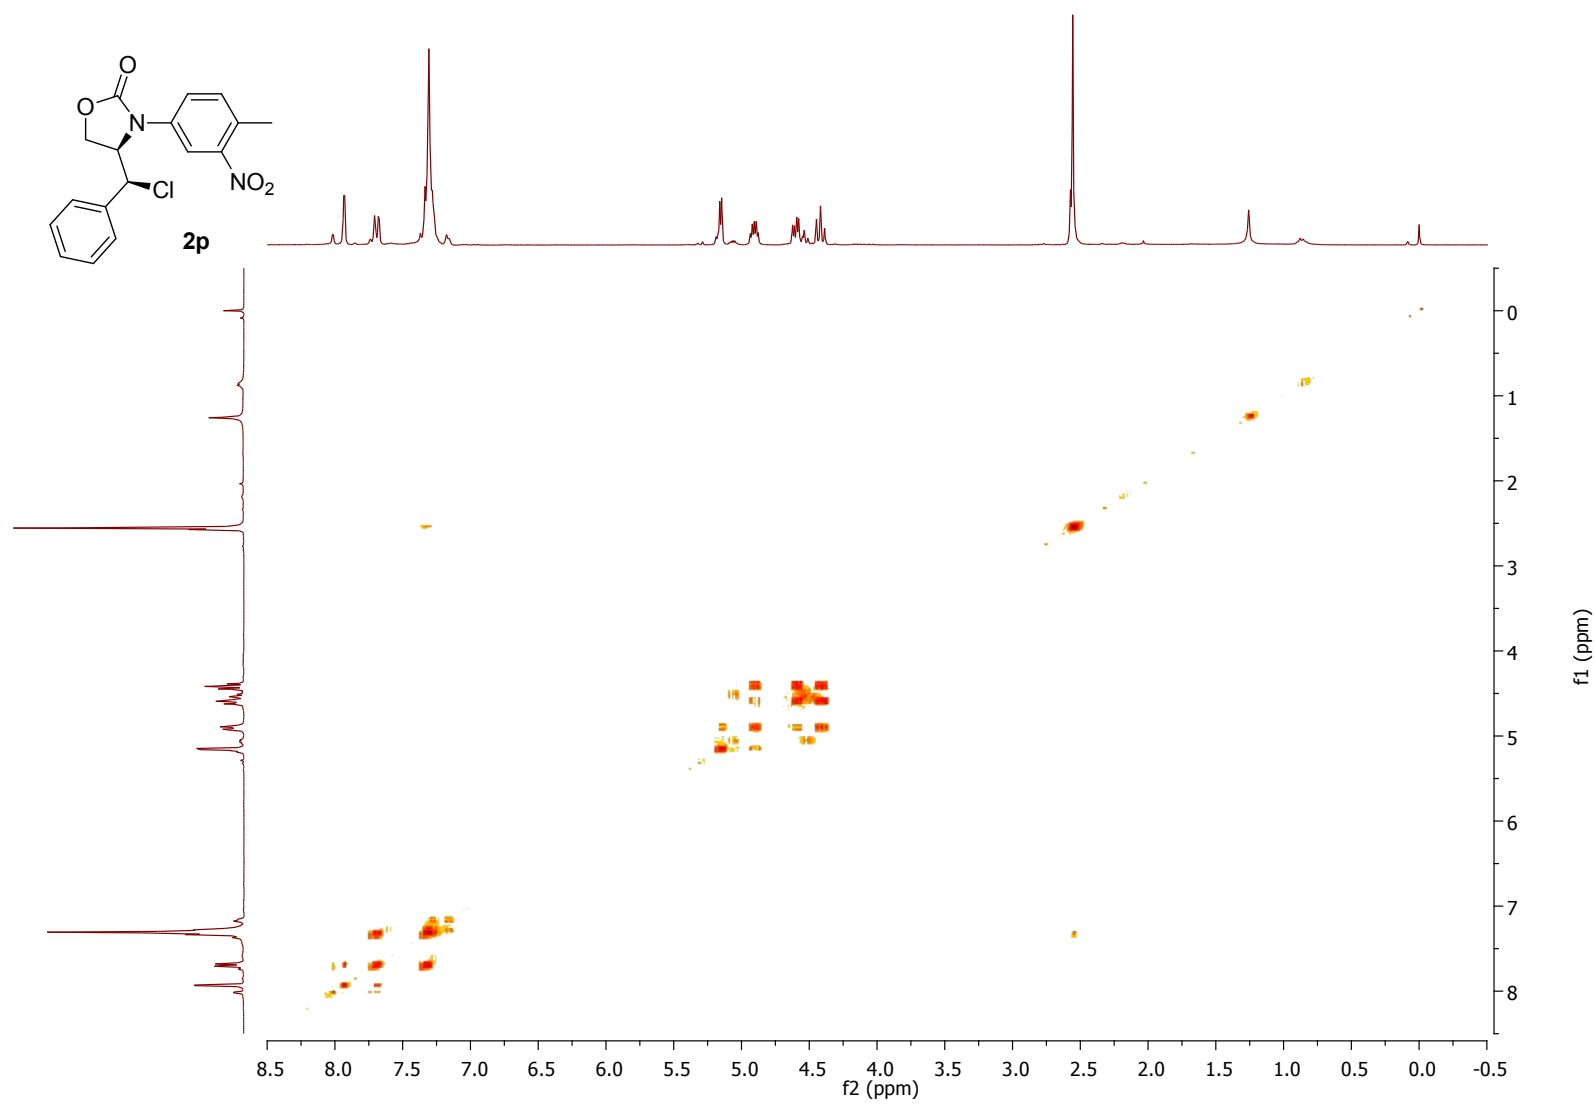



HSQC of substrate **2p**

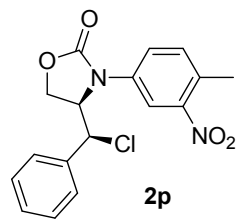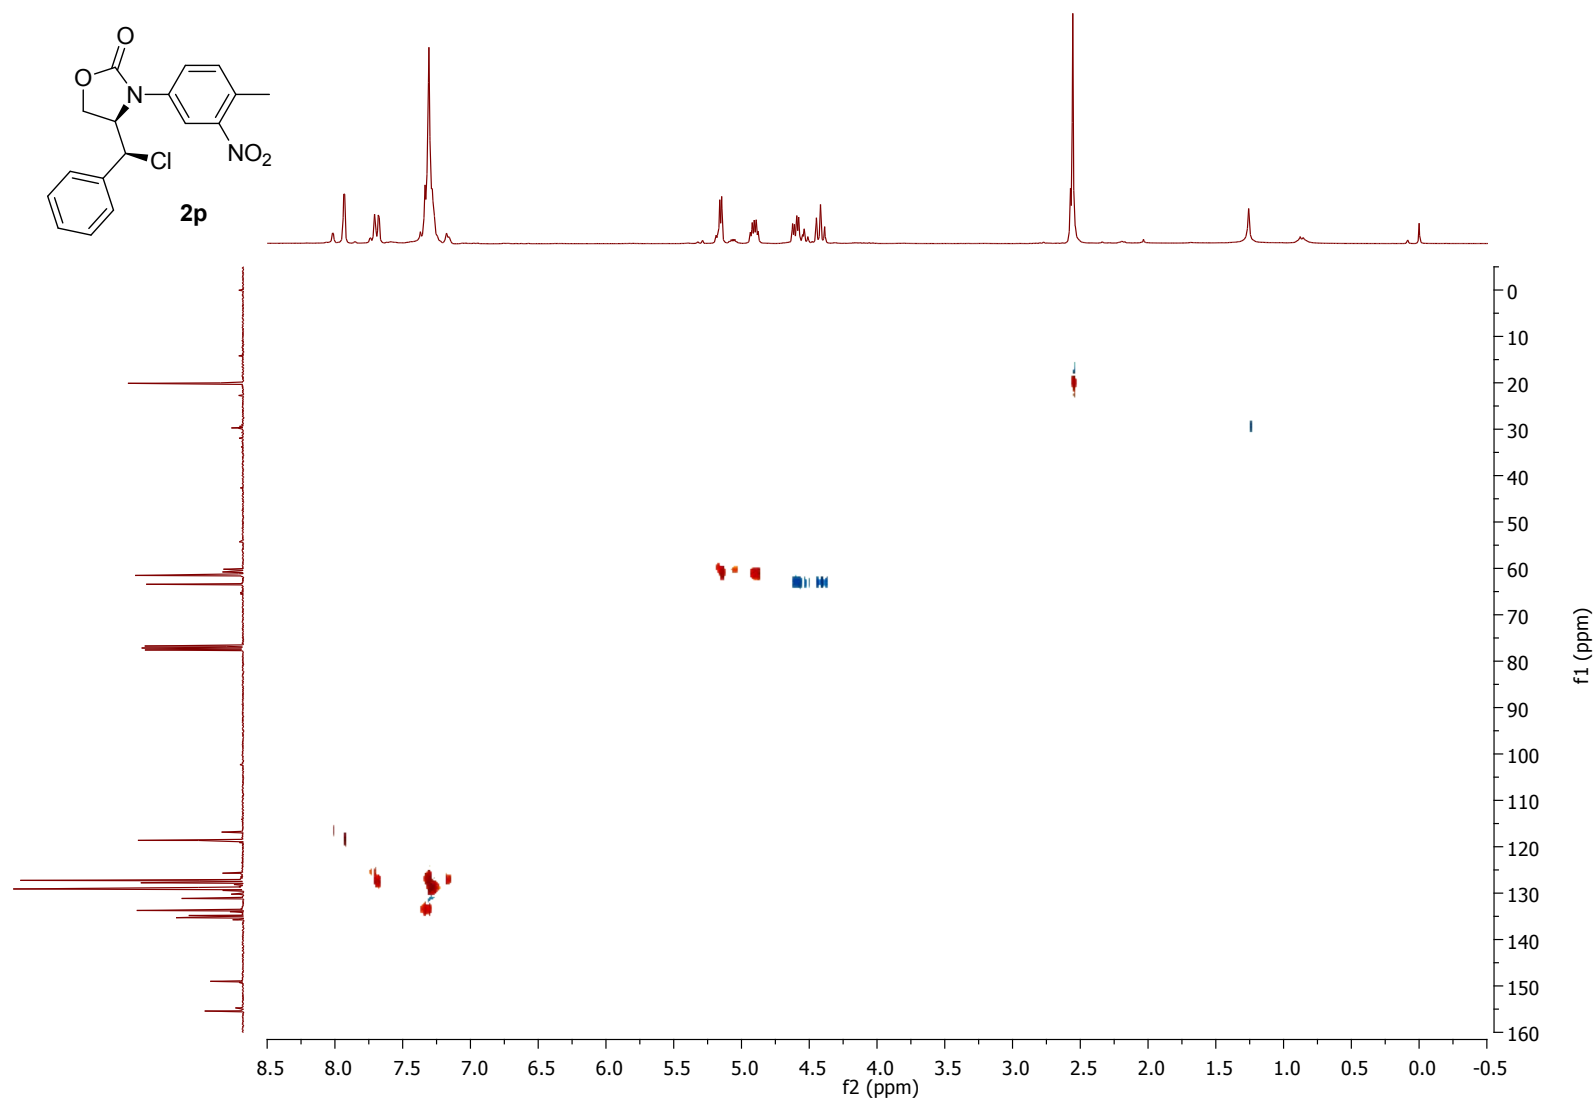

<sup>1</sup>H NMR (300 MHz, CDCl<sub>3</sub>) of substrate **2q**

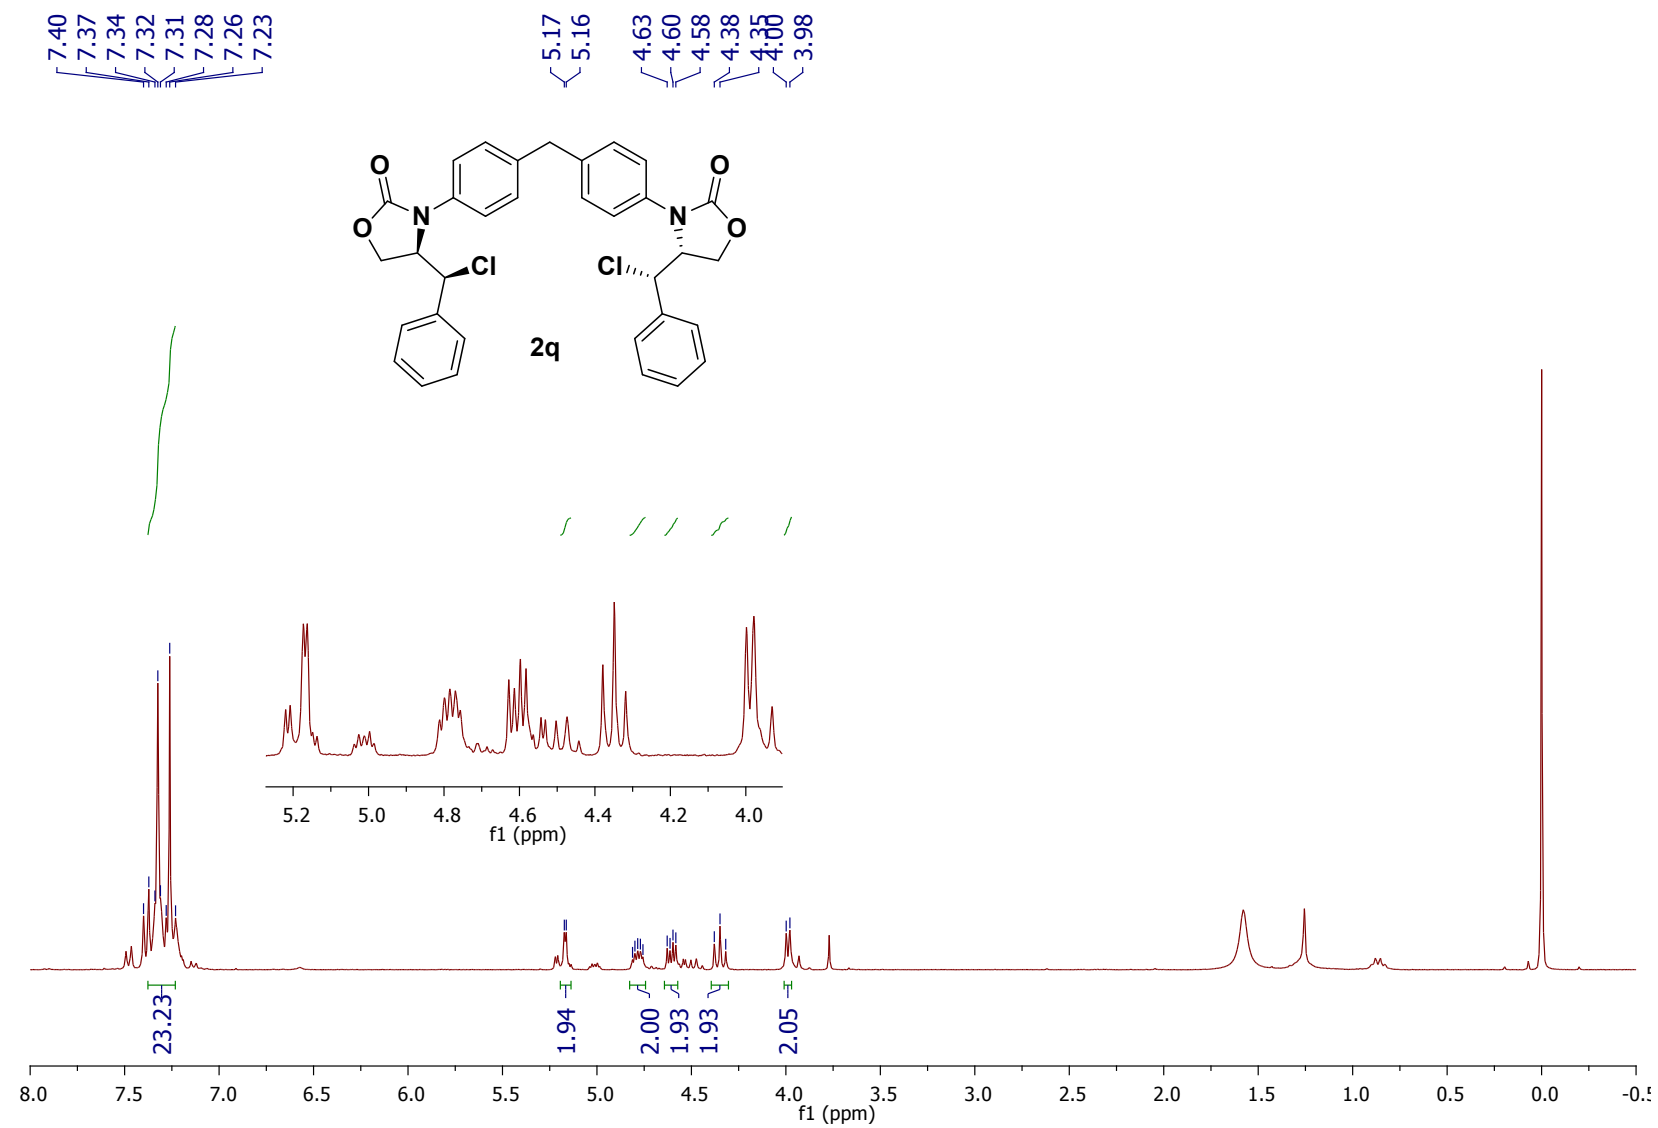

<sup>13</sup>C NMR (75 MHz, CDCl<sub>3</sub>) of substrate **2q**

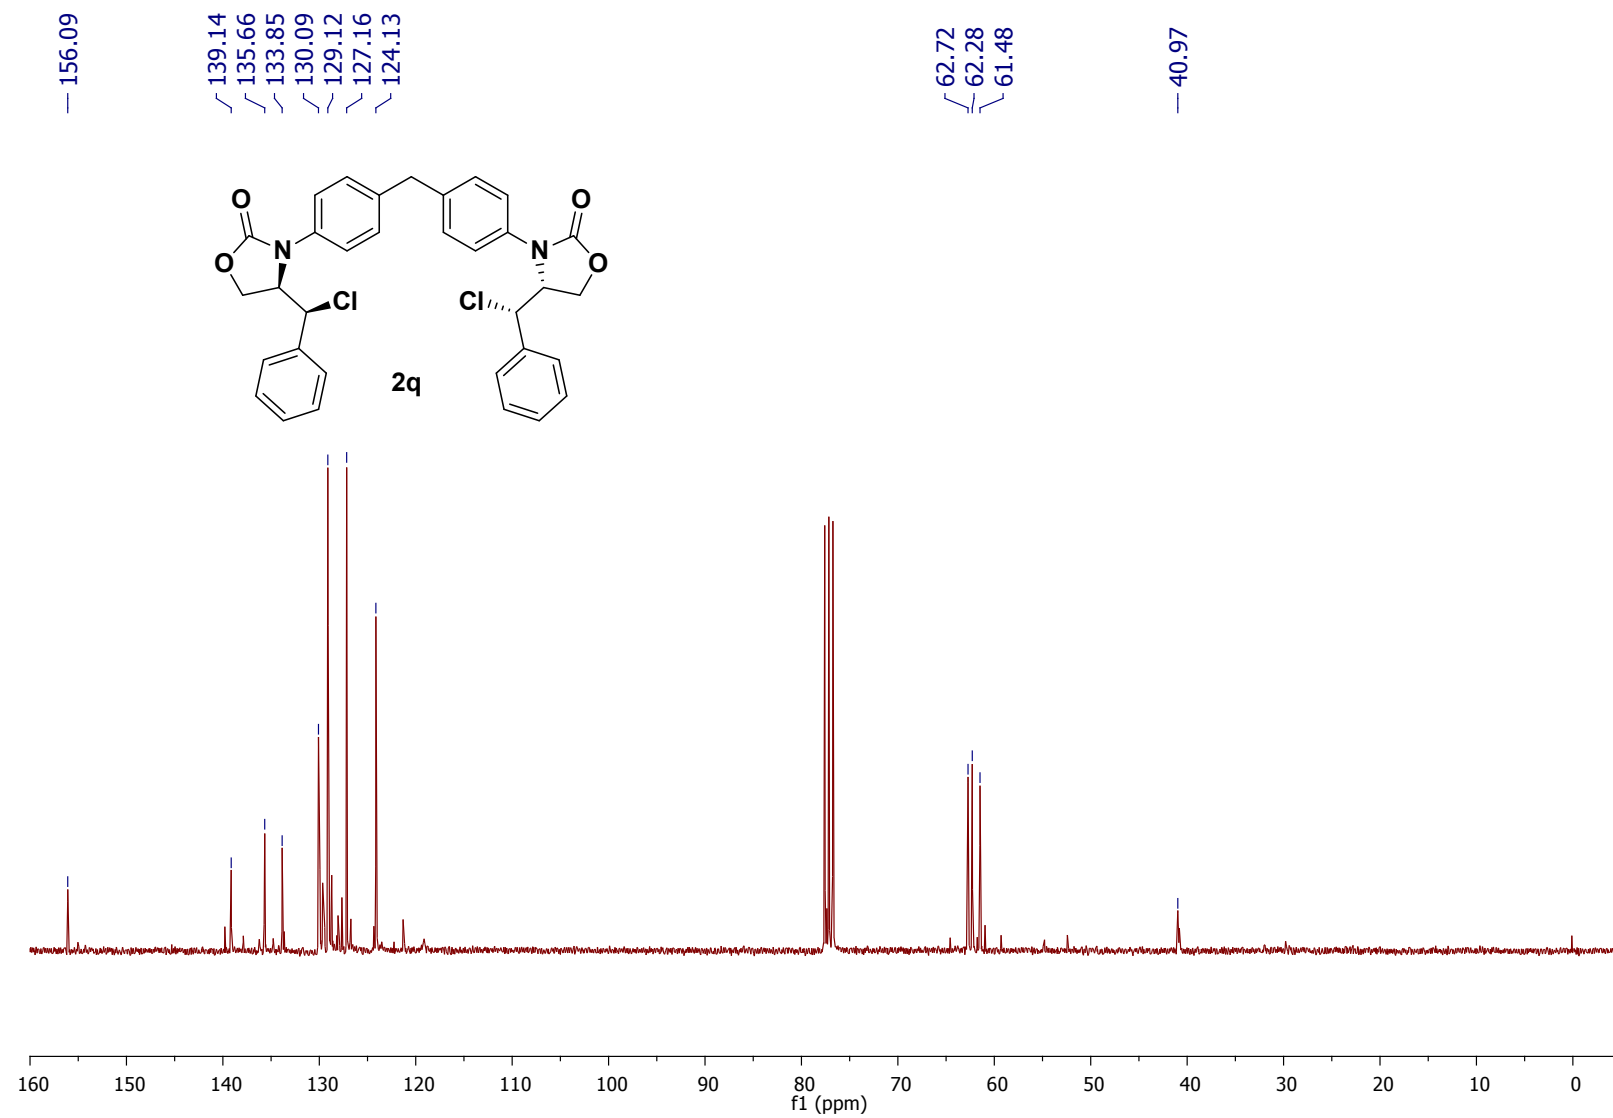

COSY of substrate **2q**

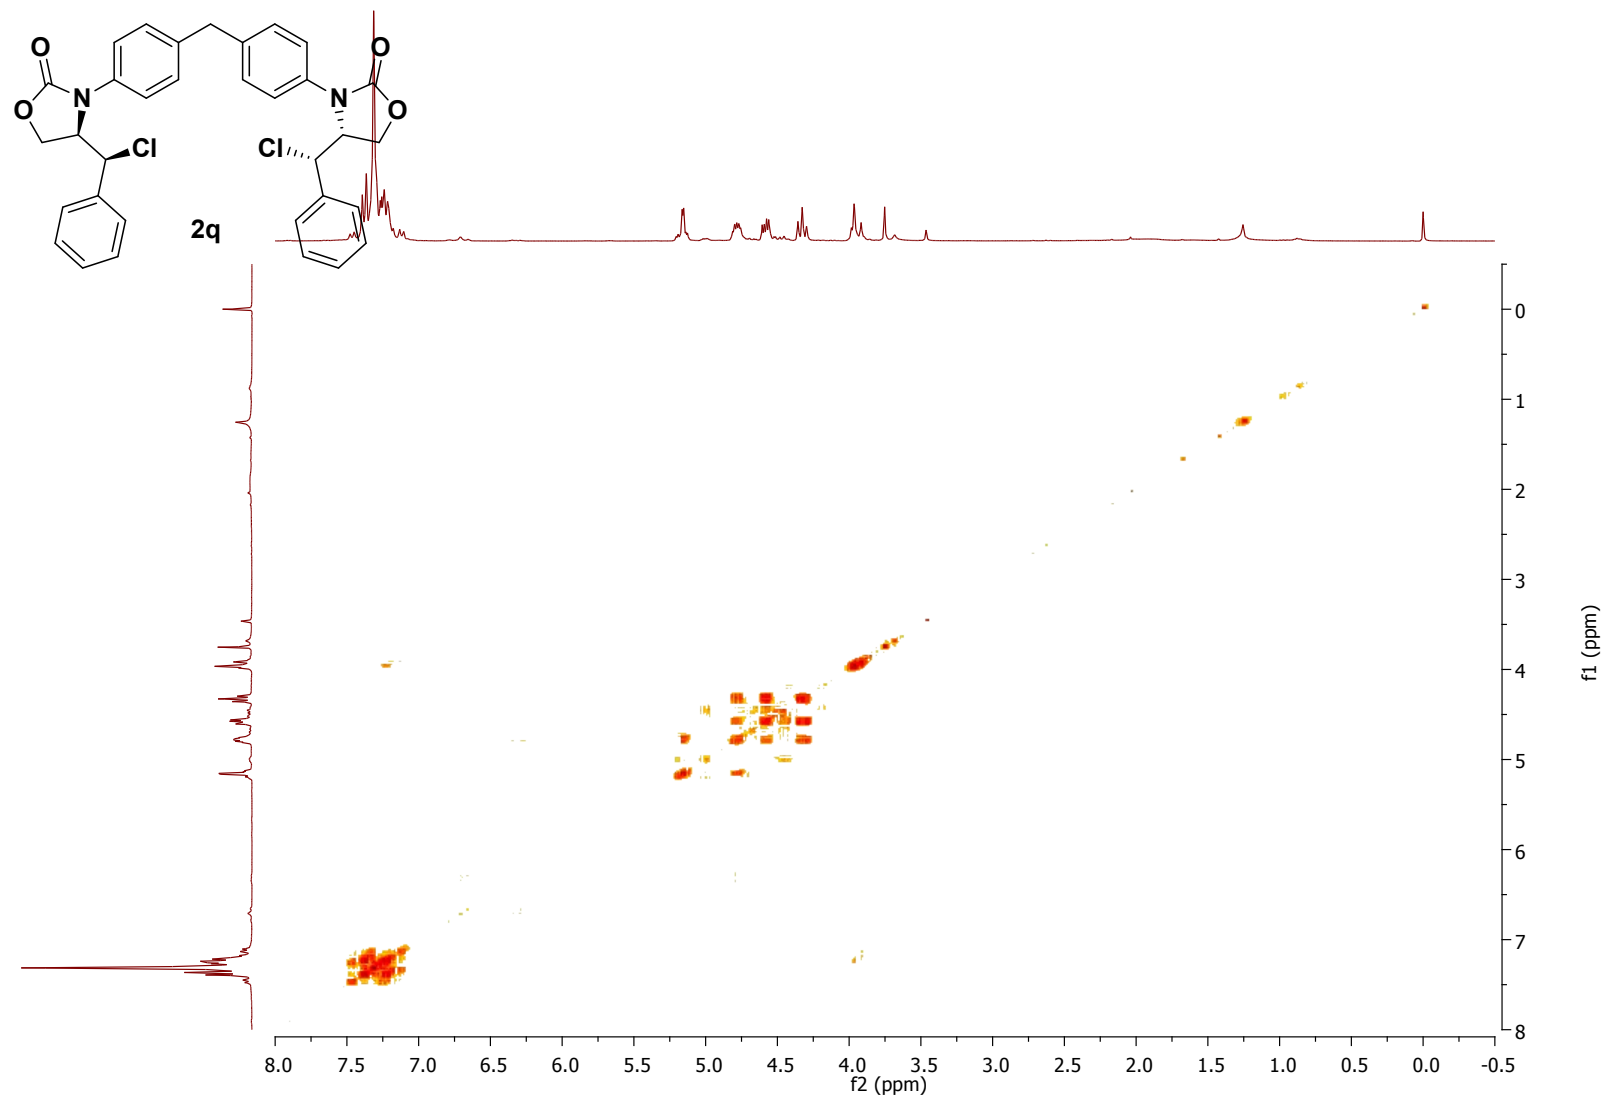

HSQC of substrate **2q**

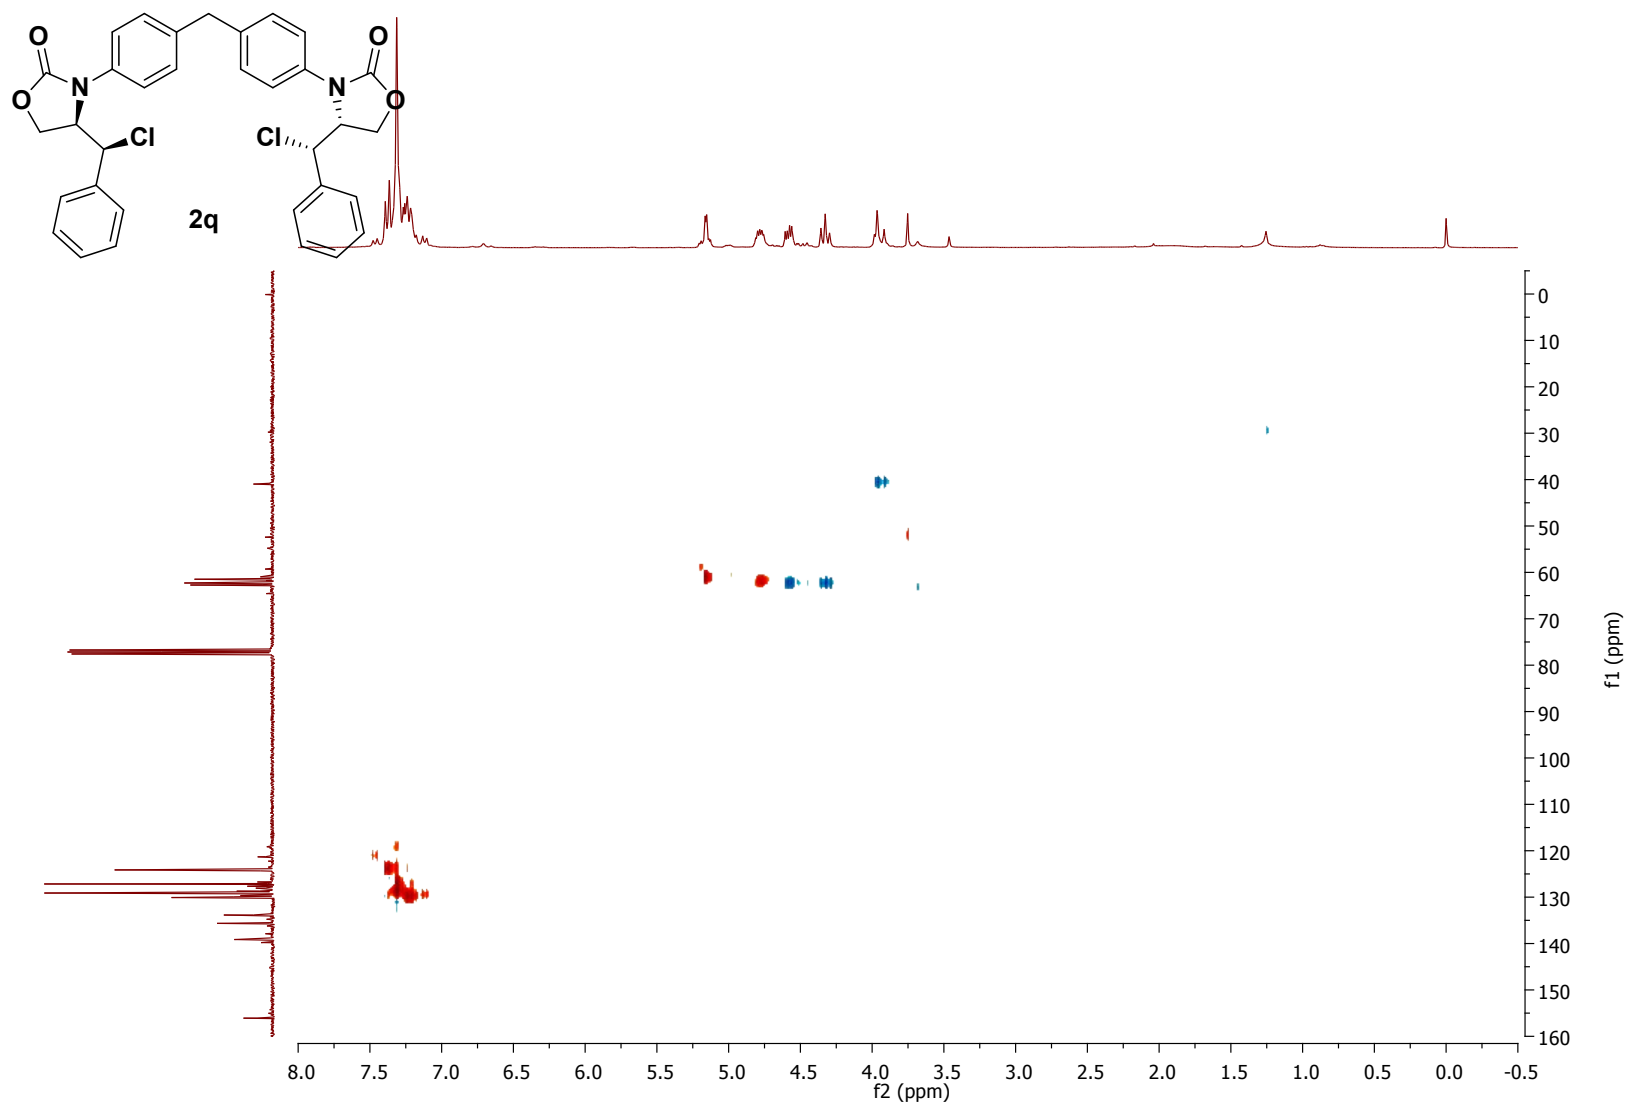

$^1\text{H}$  NMR (300 MHz,  $\text{CDCl}_3$ ) of substrate **3r**

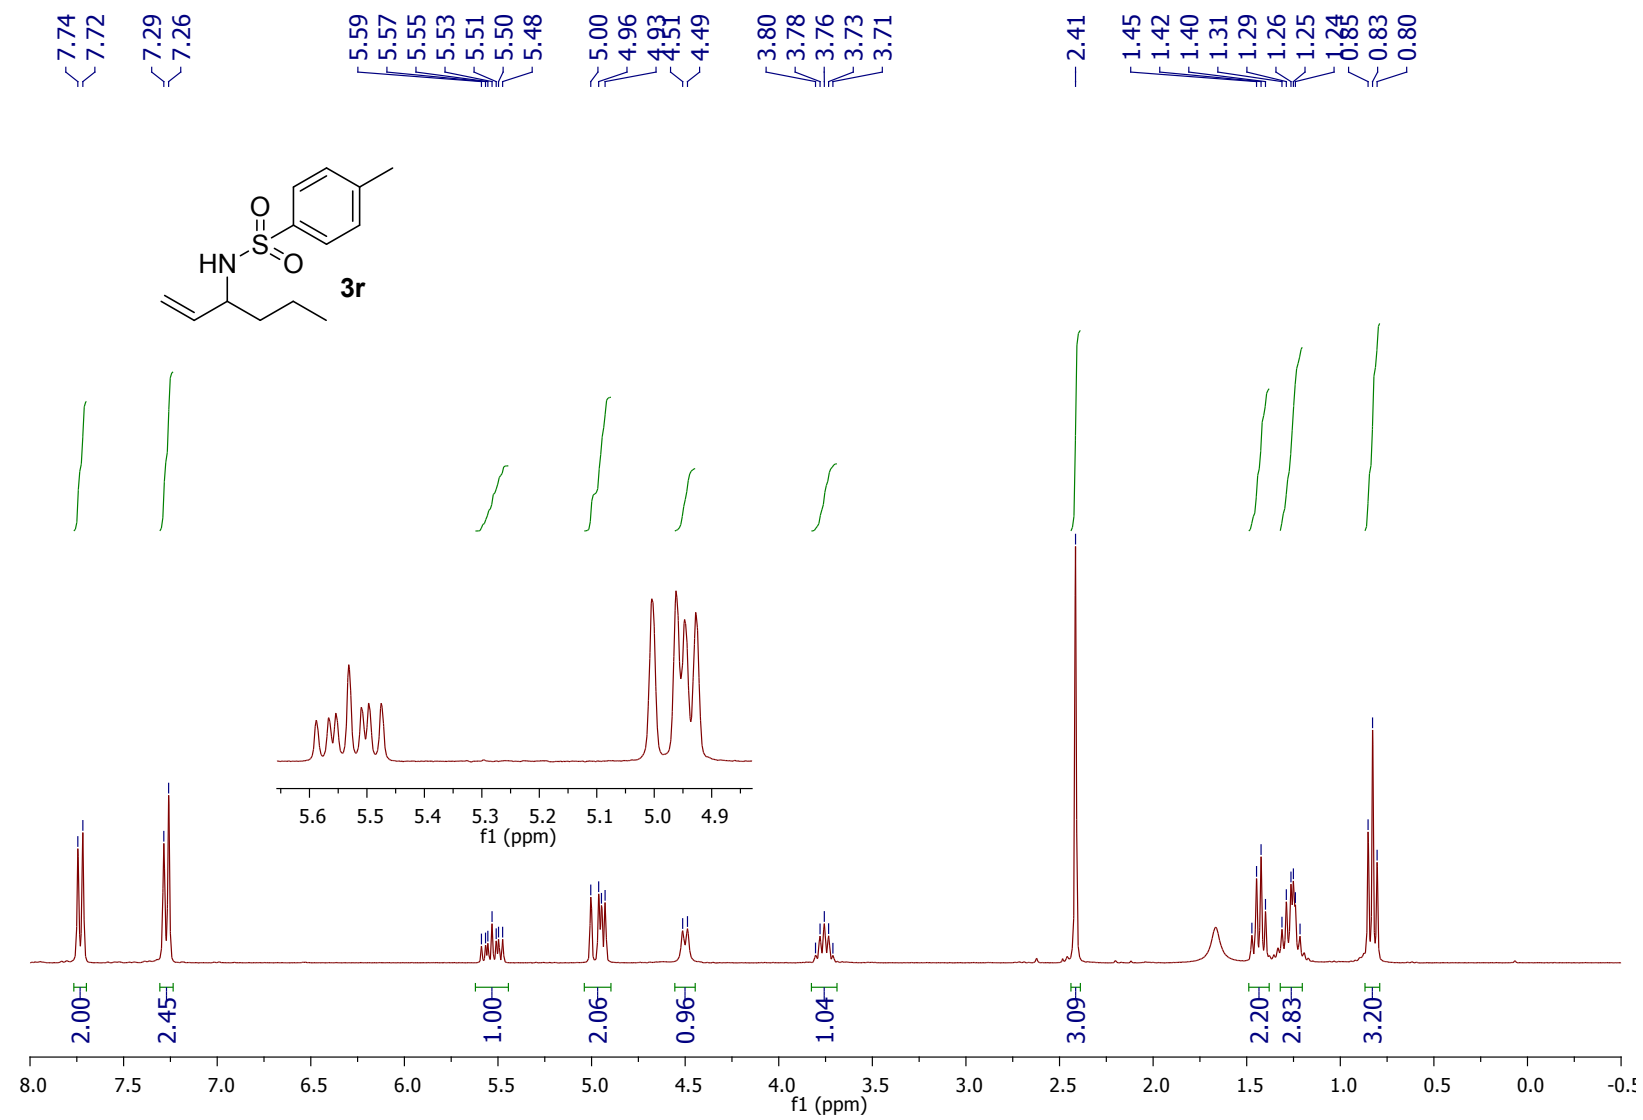

<sup>1</sup>H NMR (300 MHz, CDCl<sub>3</sub>) of substrate **2s**

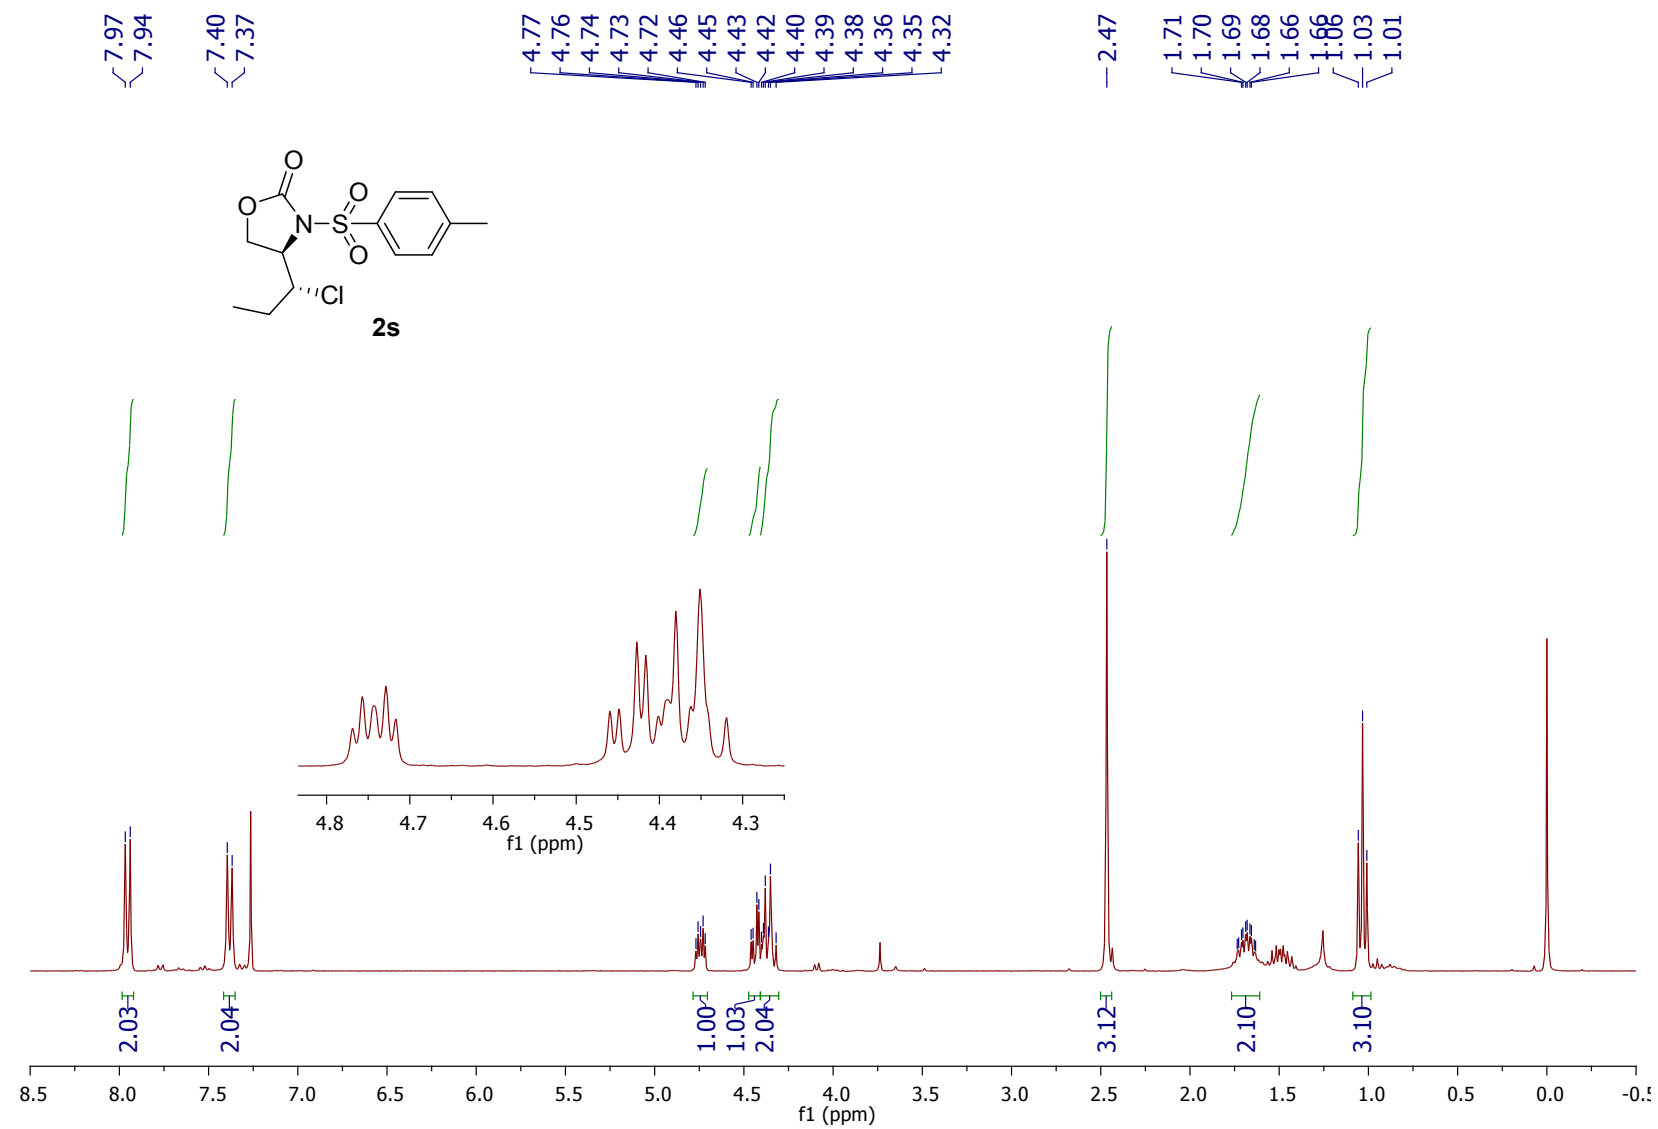

<sup>13</sup>C NMR (75 MHz, CDCl<sub>3</sub>) of substrate **2s**

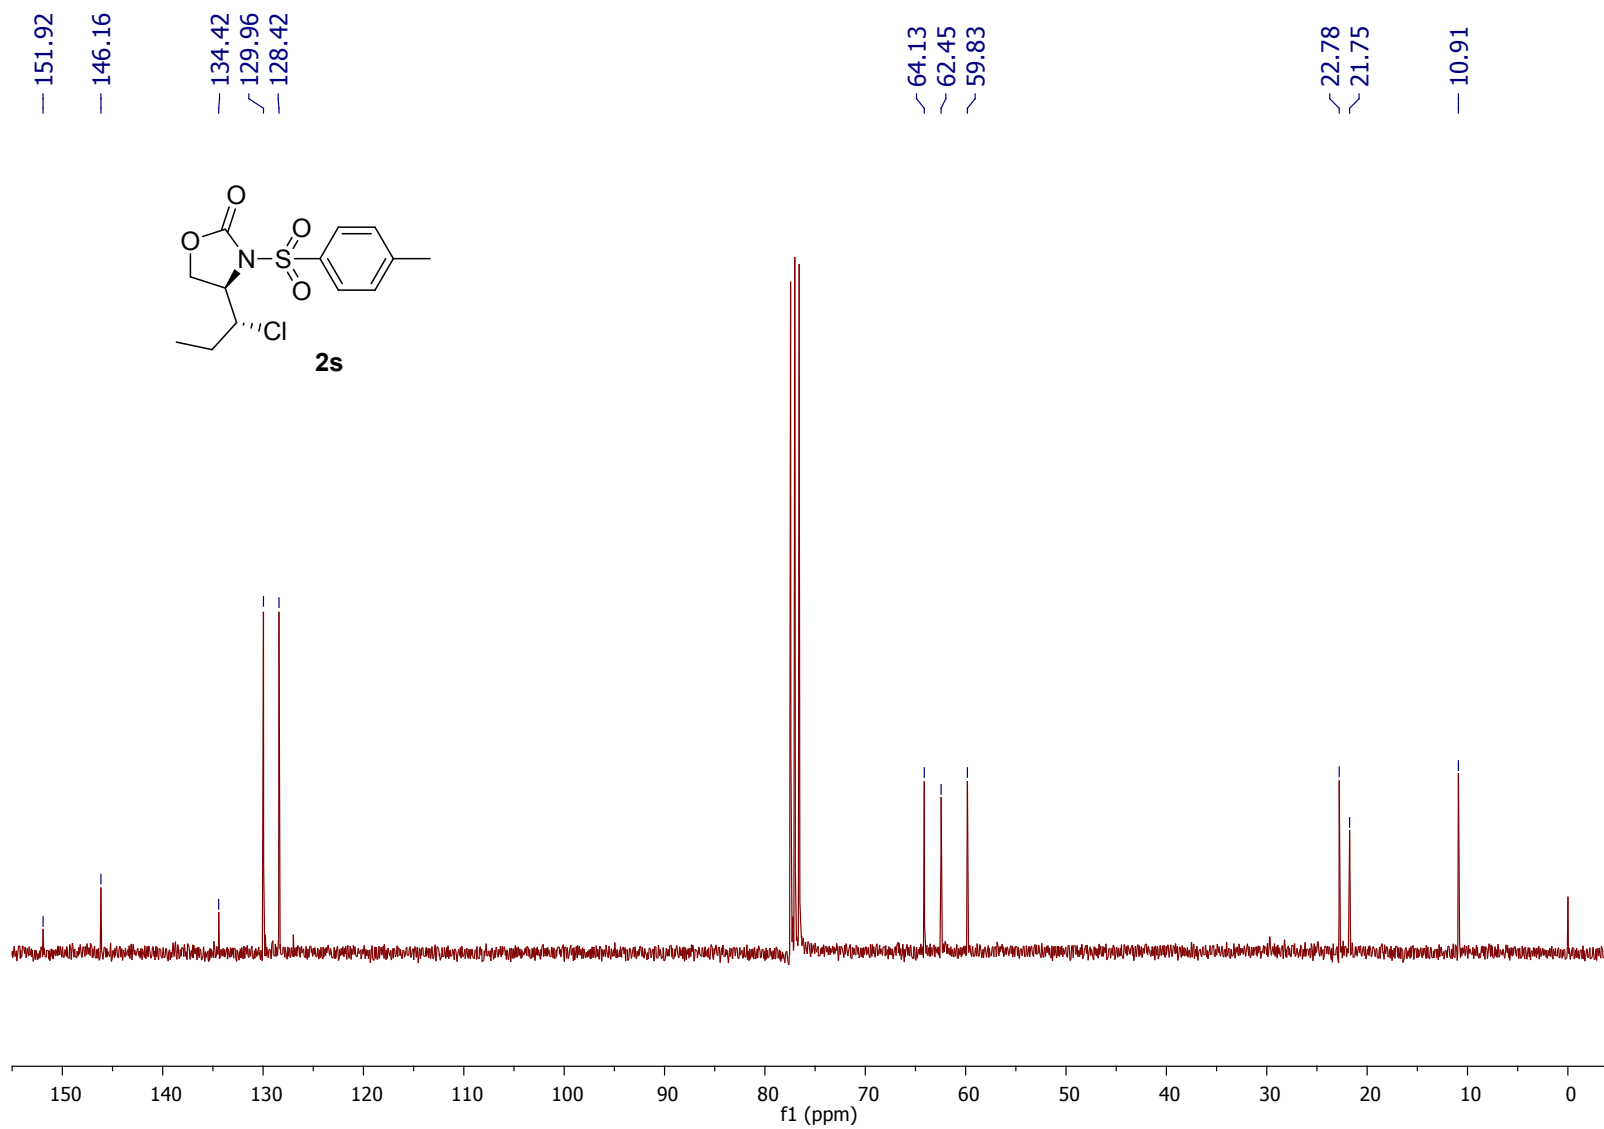



COSY of substrate **2s**

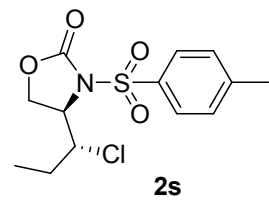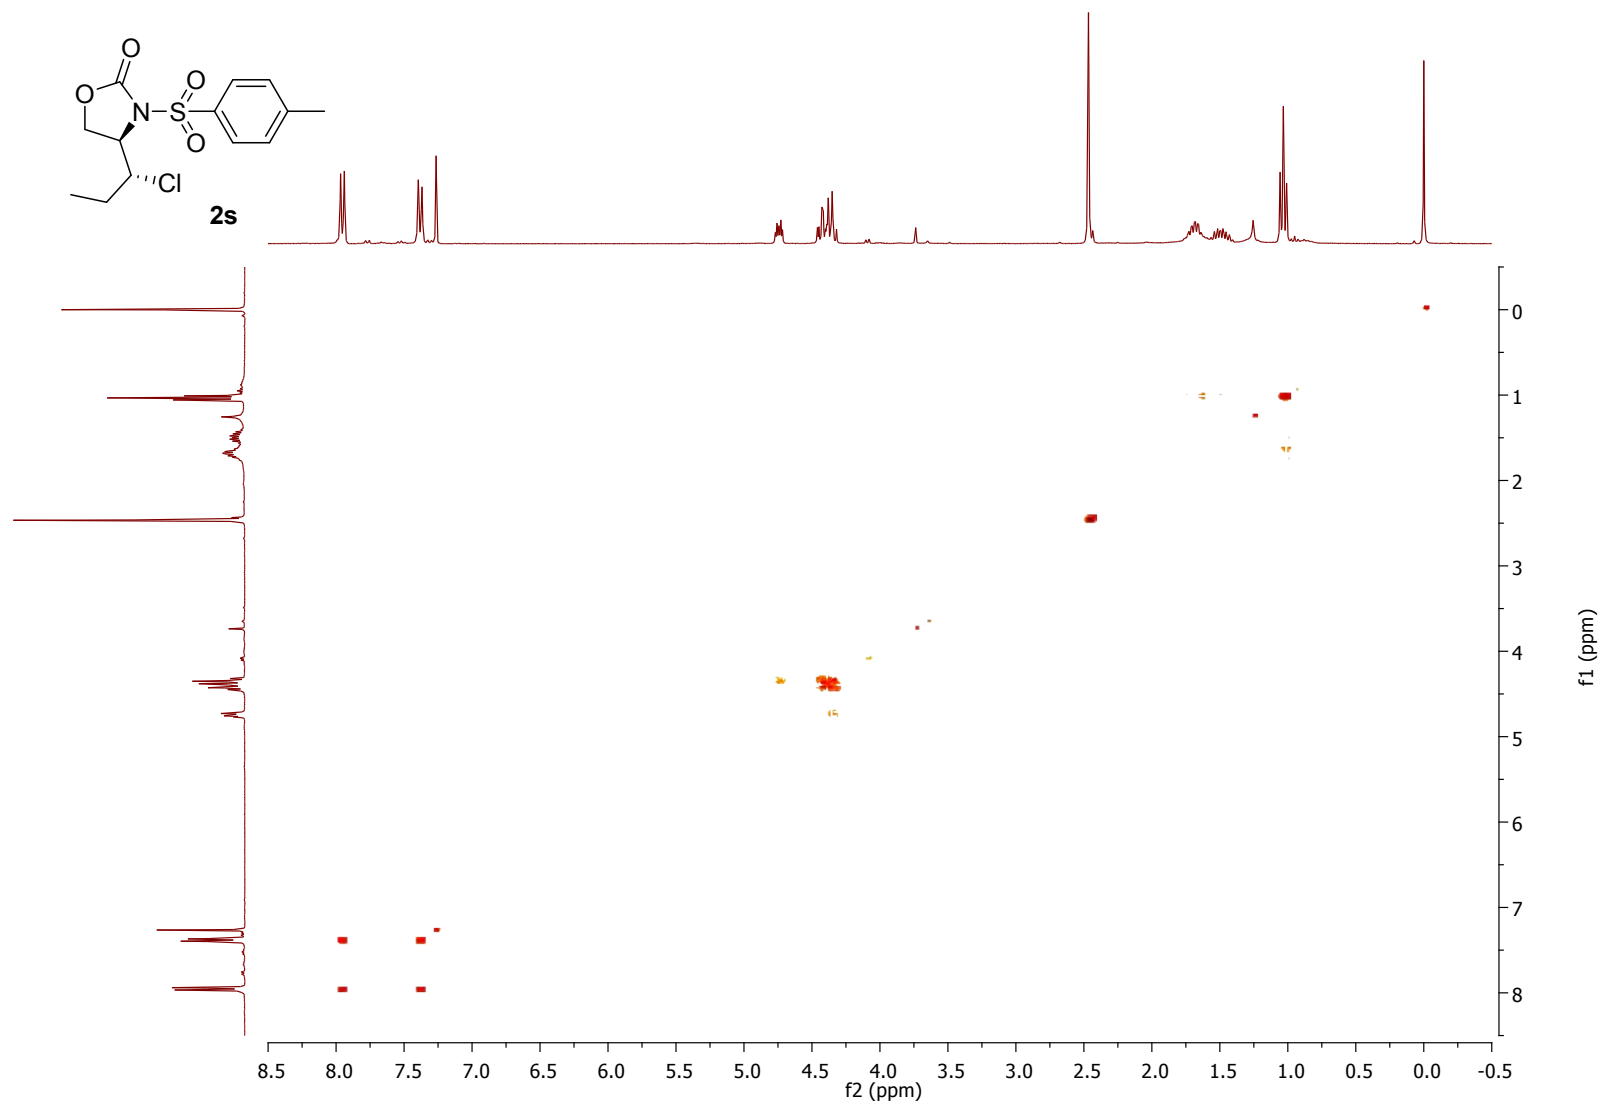

HSQC of substrate **2s**

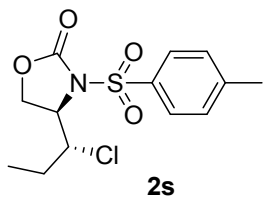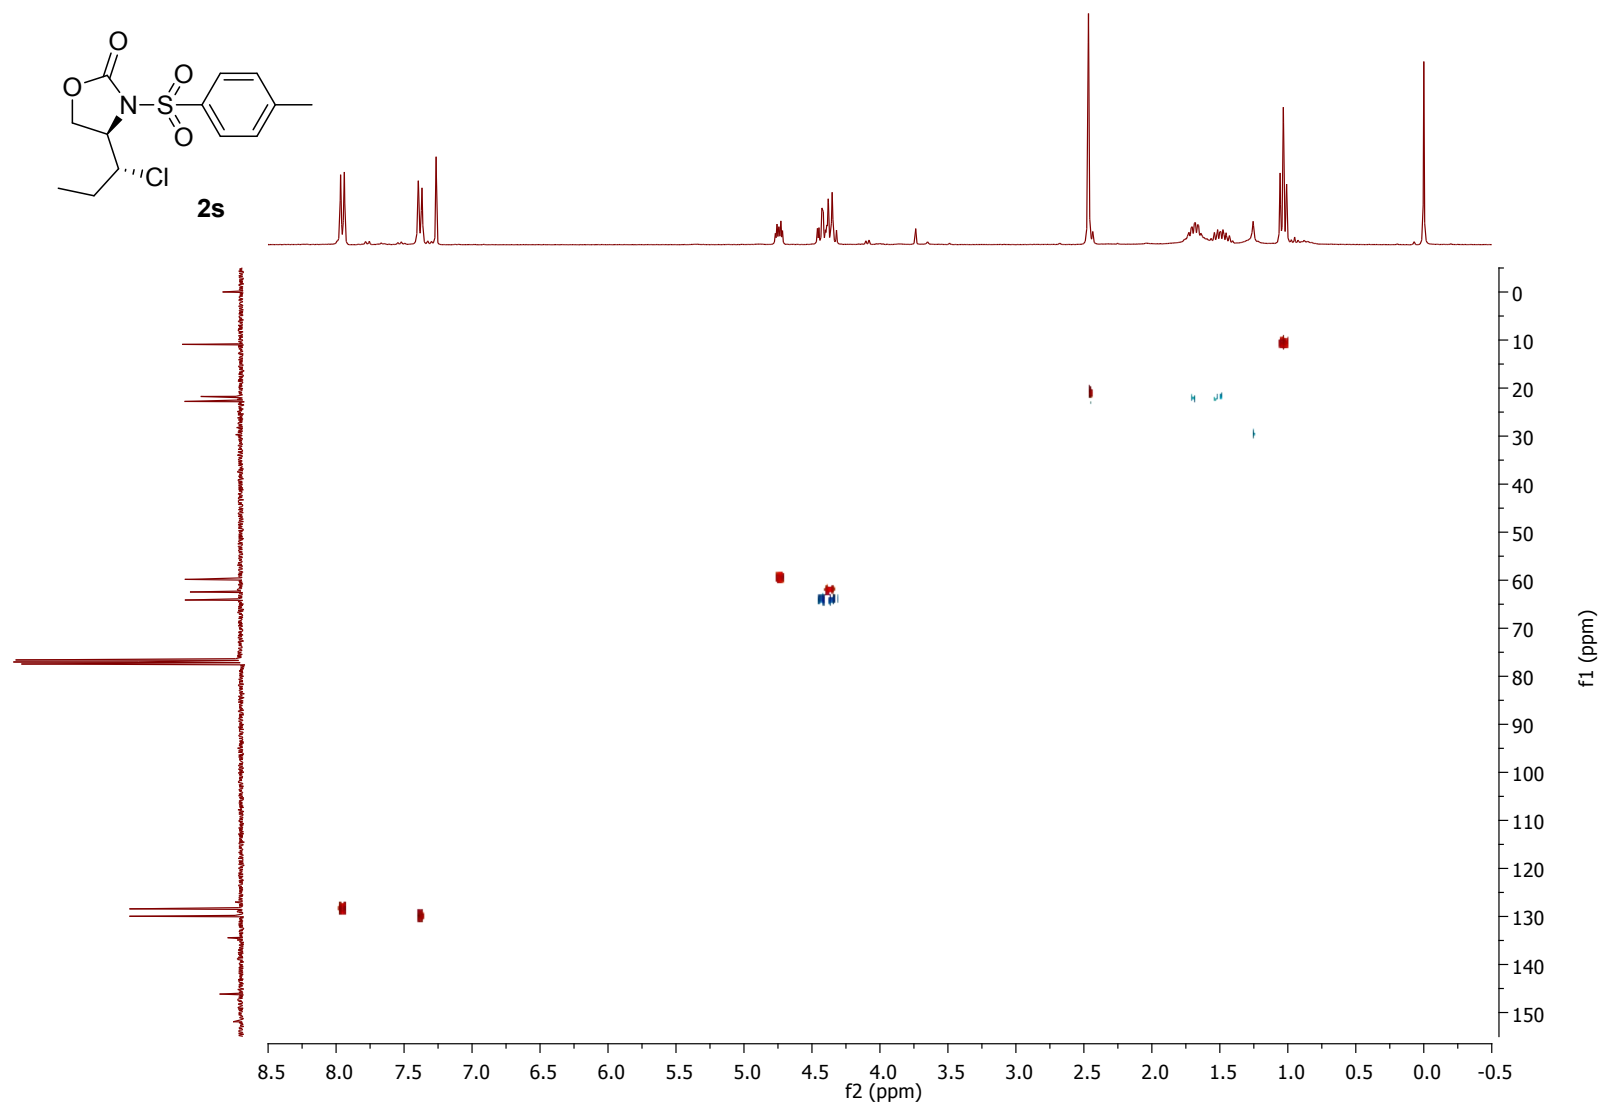

<sup>1</sup>H NMR (300 MHz, CDCl<sub>3</sub>) of compound **4a**

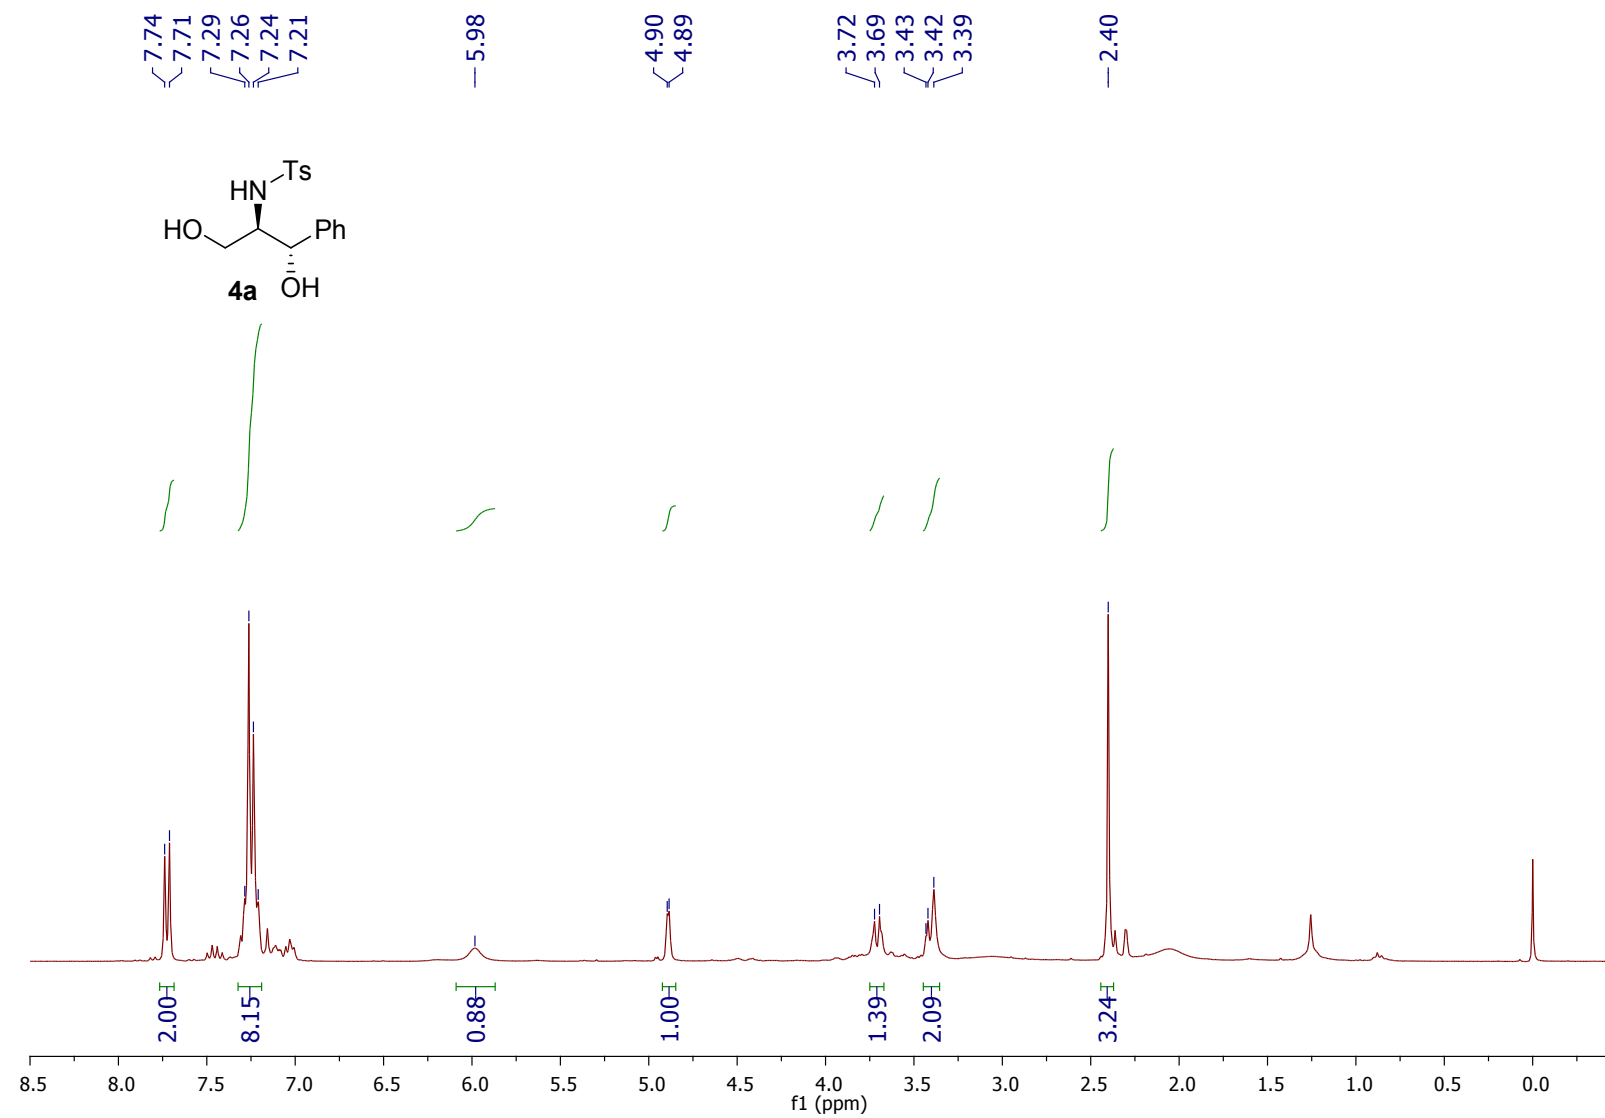

$^{13}\text{C}$  NMR (75 MHz,  $\text{CDCl}_3$ ) of compound **4a**

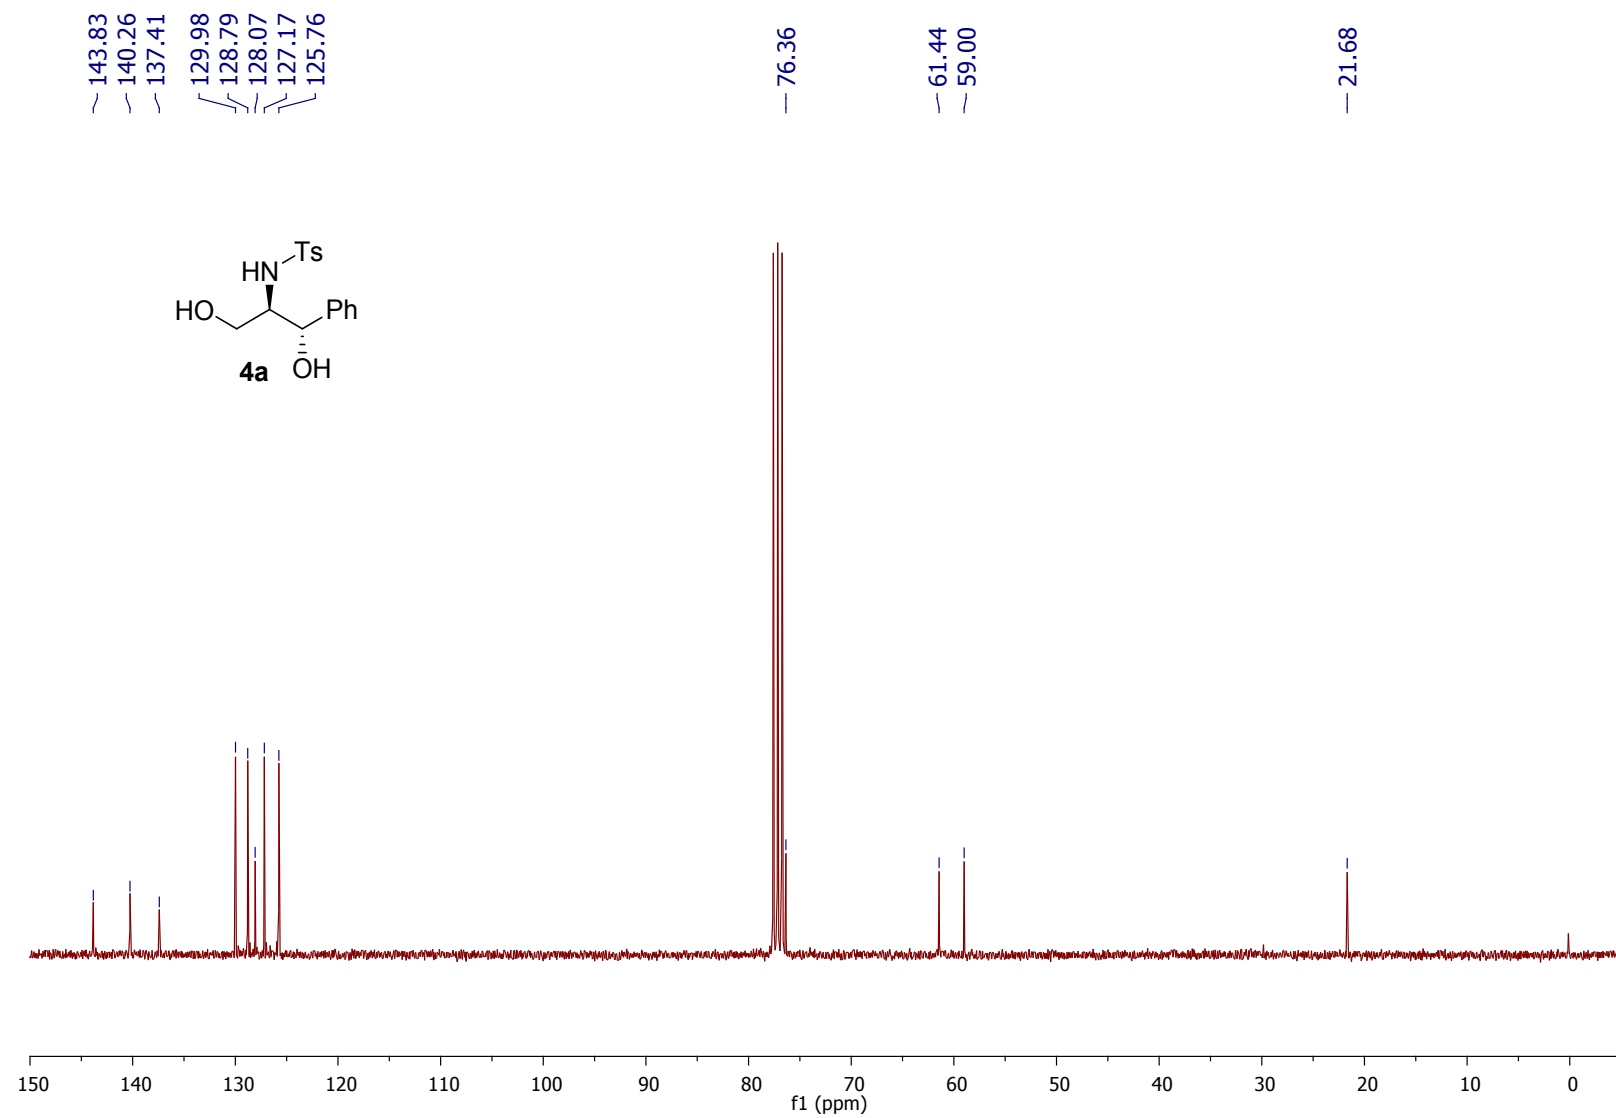

<sup>1</sup>H NMR (300 MHz, CDCl<sub>3</sub>) of compound **5a**

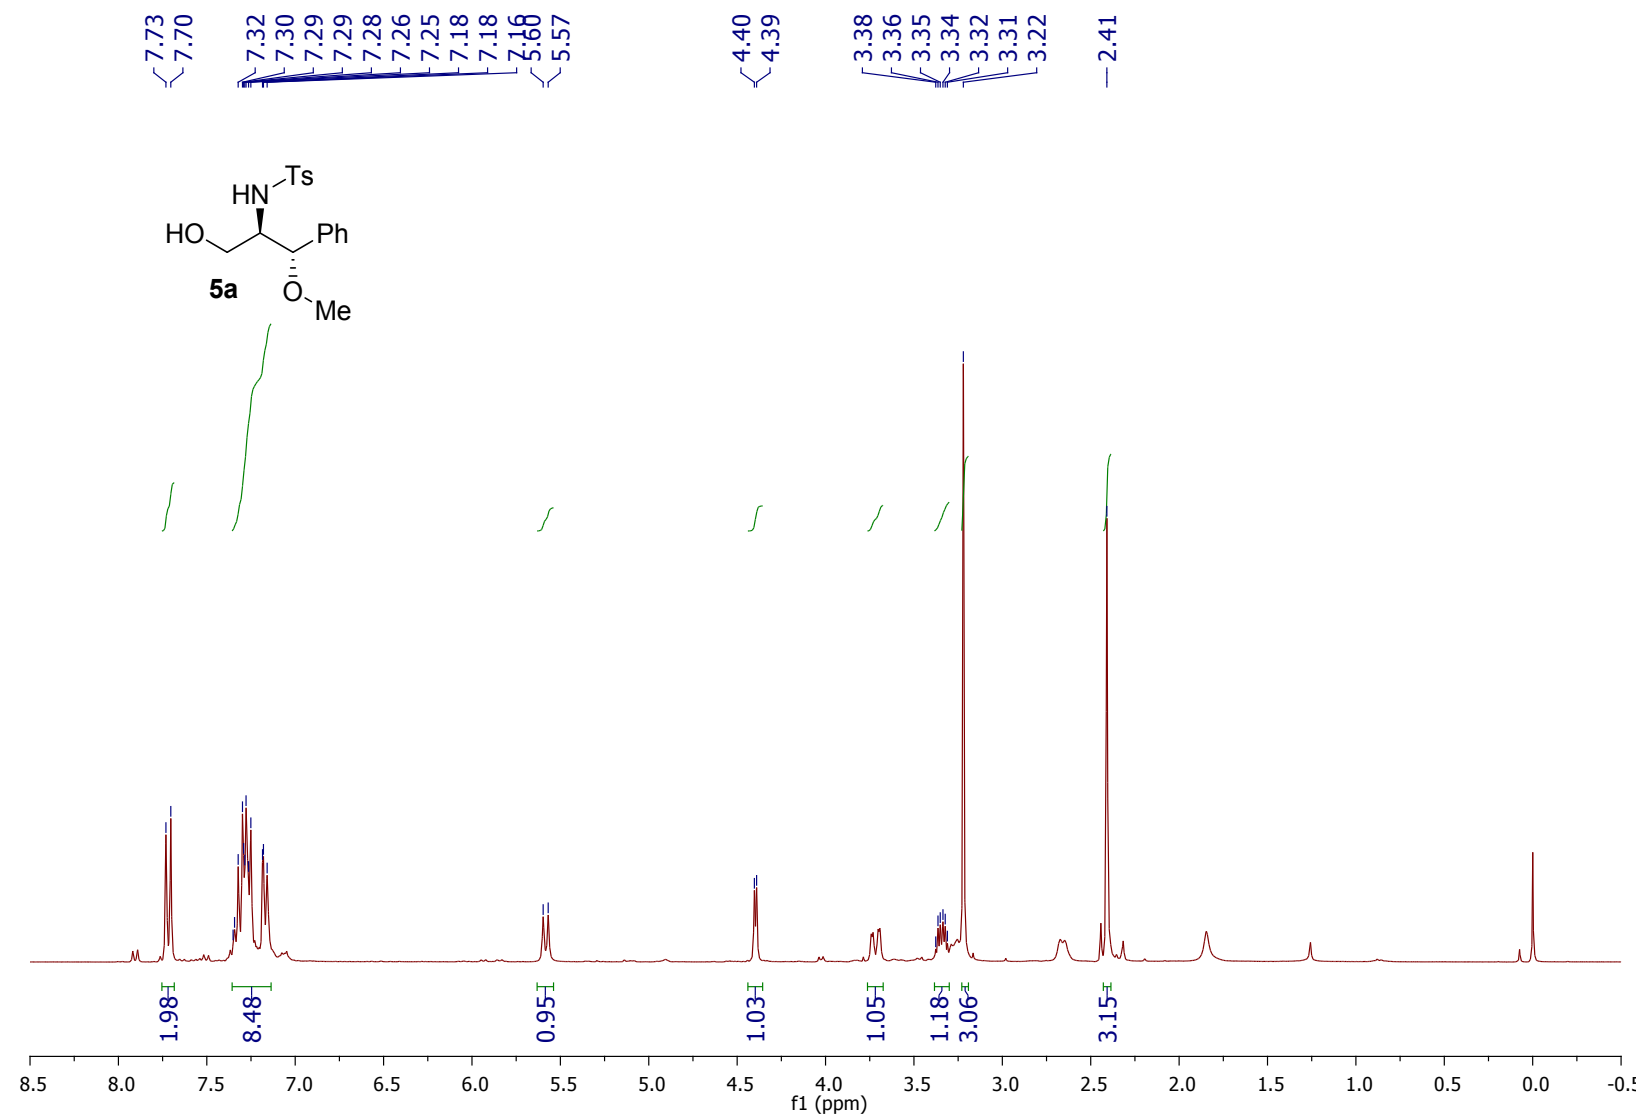

<sup>13</sup>C NMR (75 MHz, CDCl<sub>3</sub>) of compound **5a**

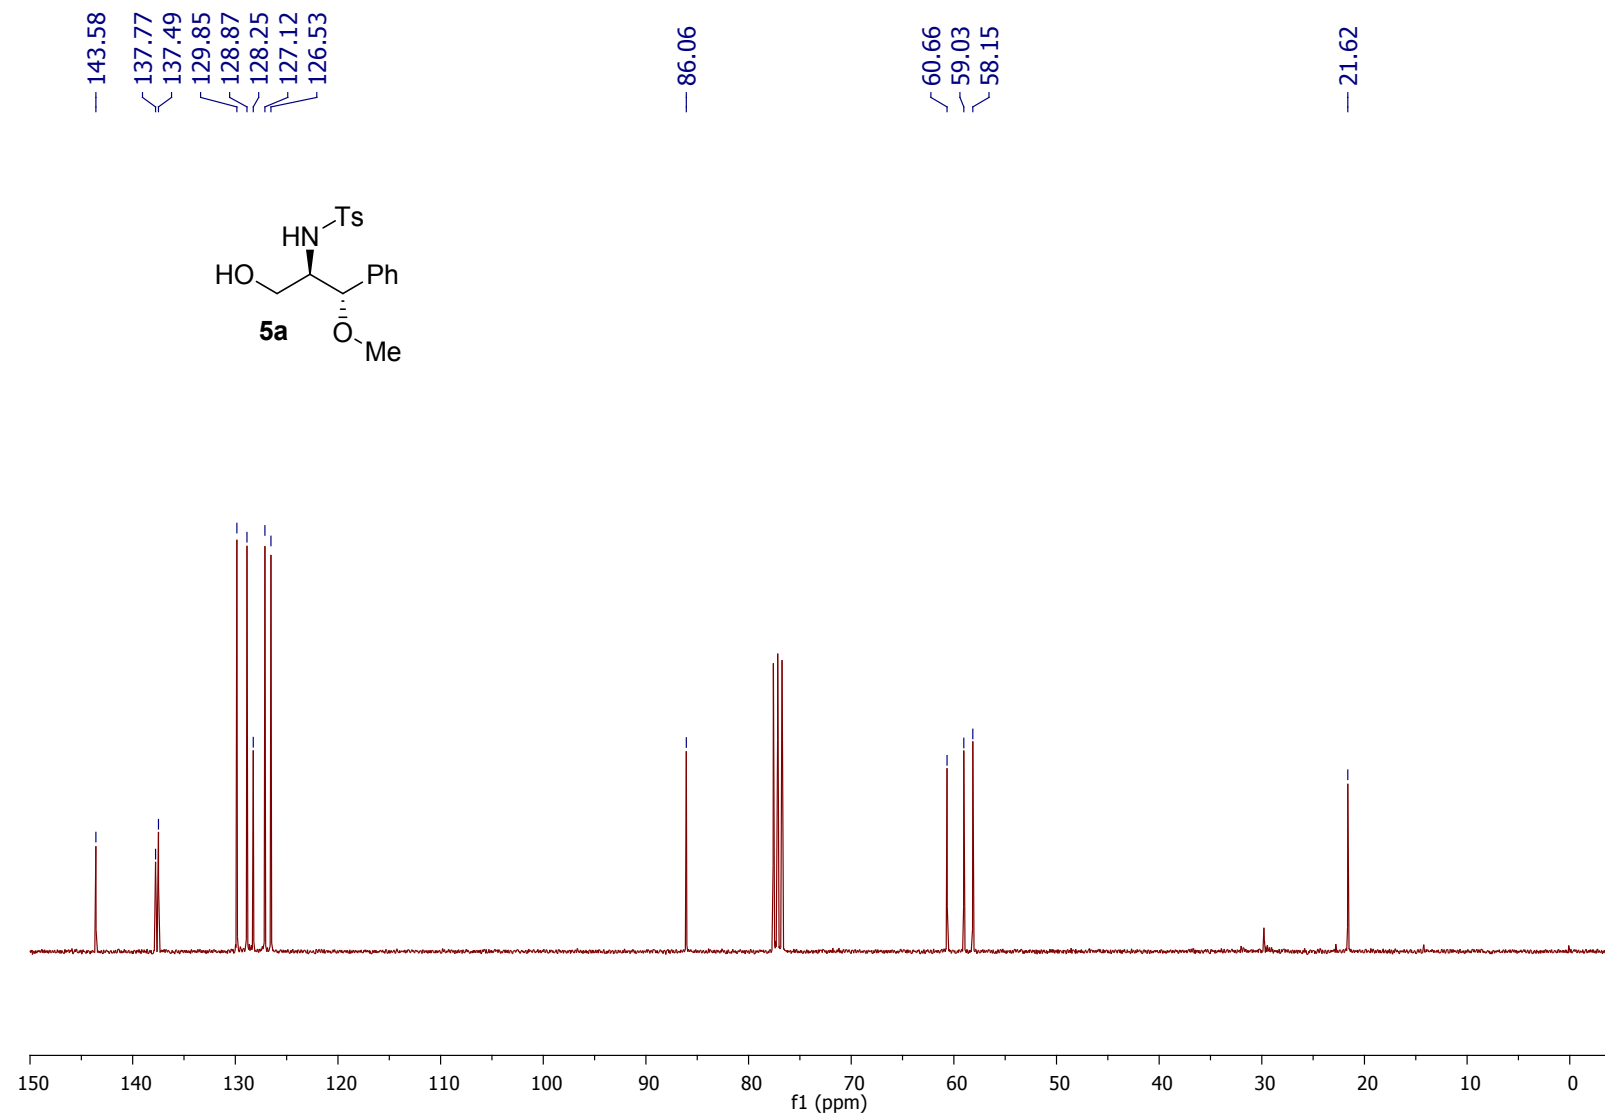

<sup>1</sup>H NMR (300 MHz, CDCl<sub>3</sub>) of compound **6a**

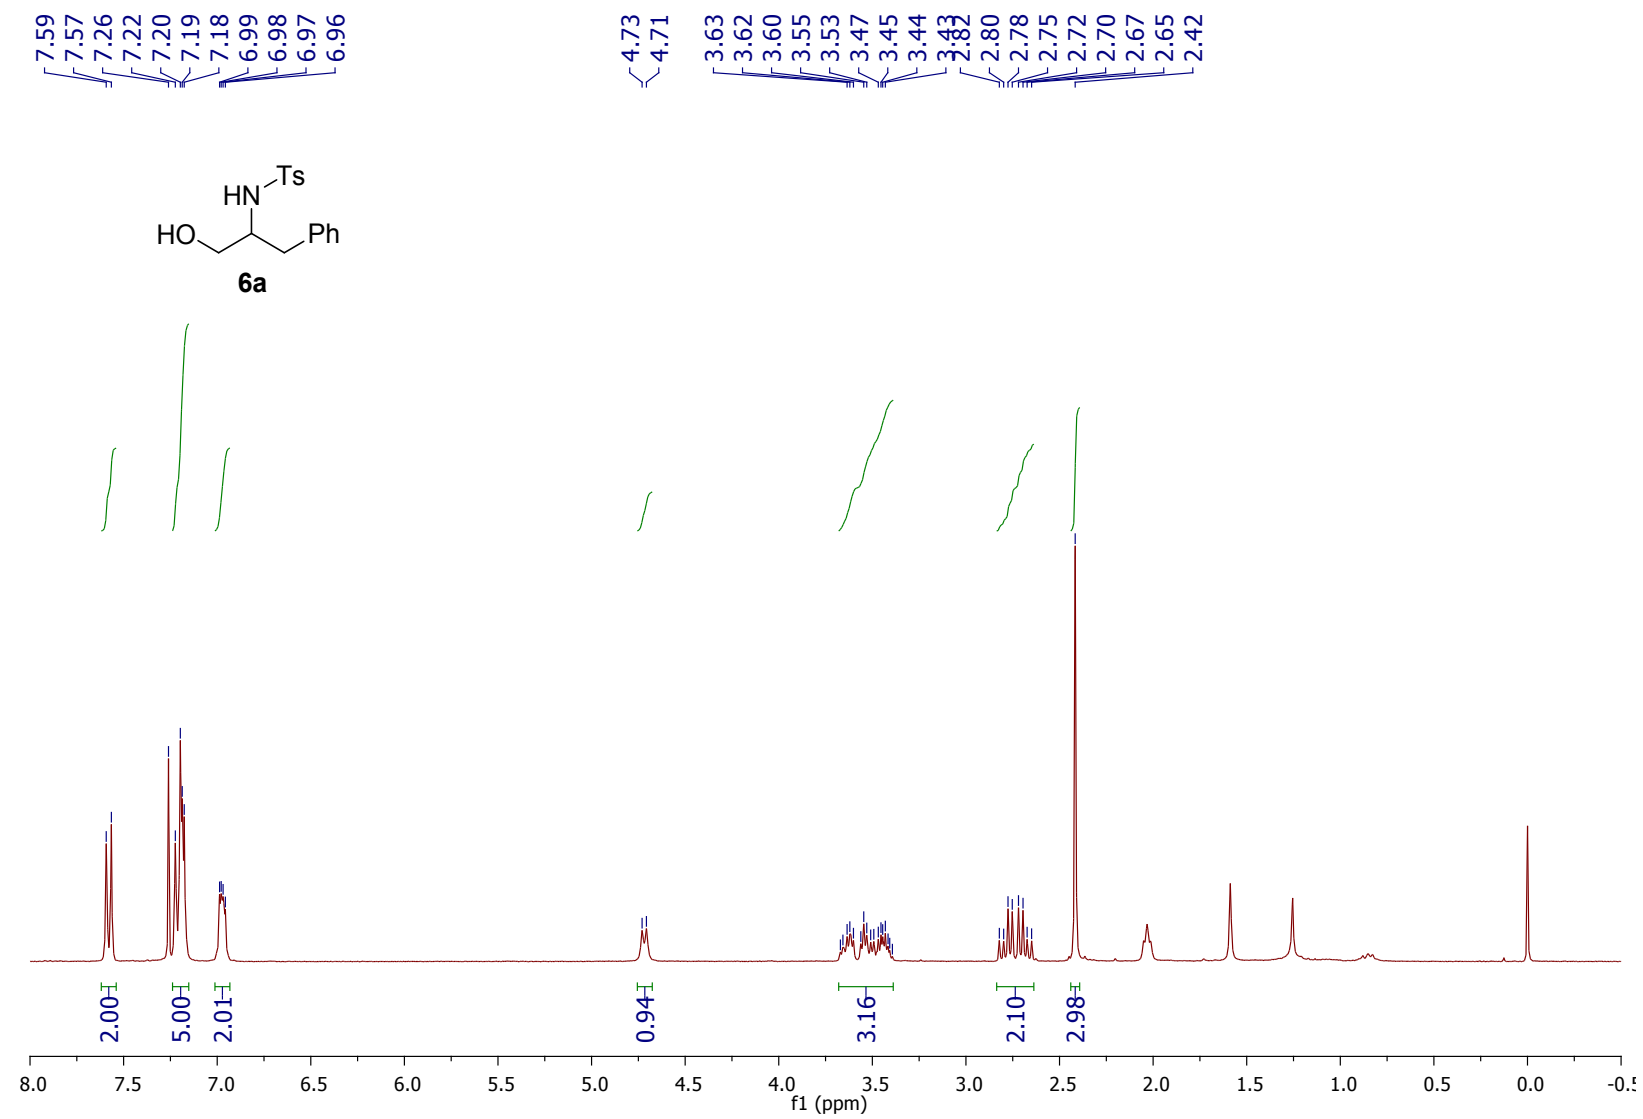

$^{13}\text{C}$  NMR (75 MHz,  $\text{CDCl}_3$ ) of compound **6a**

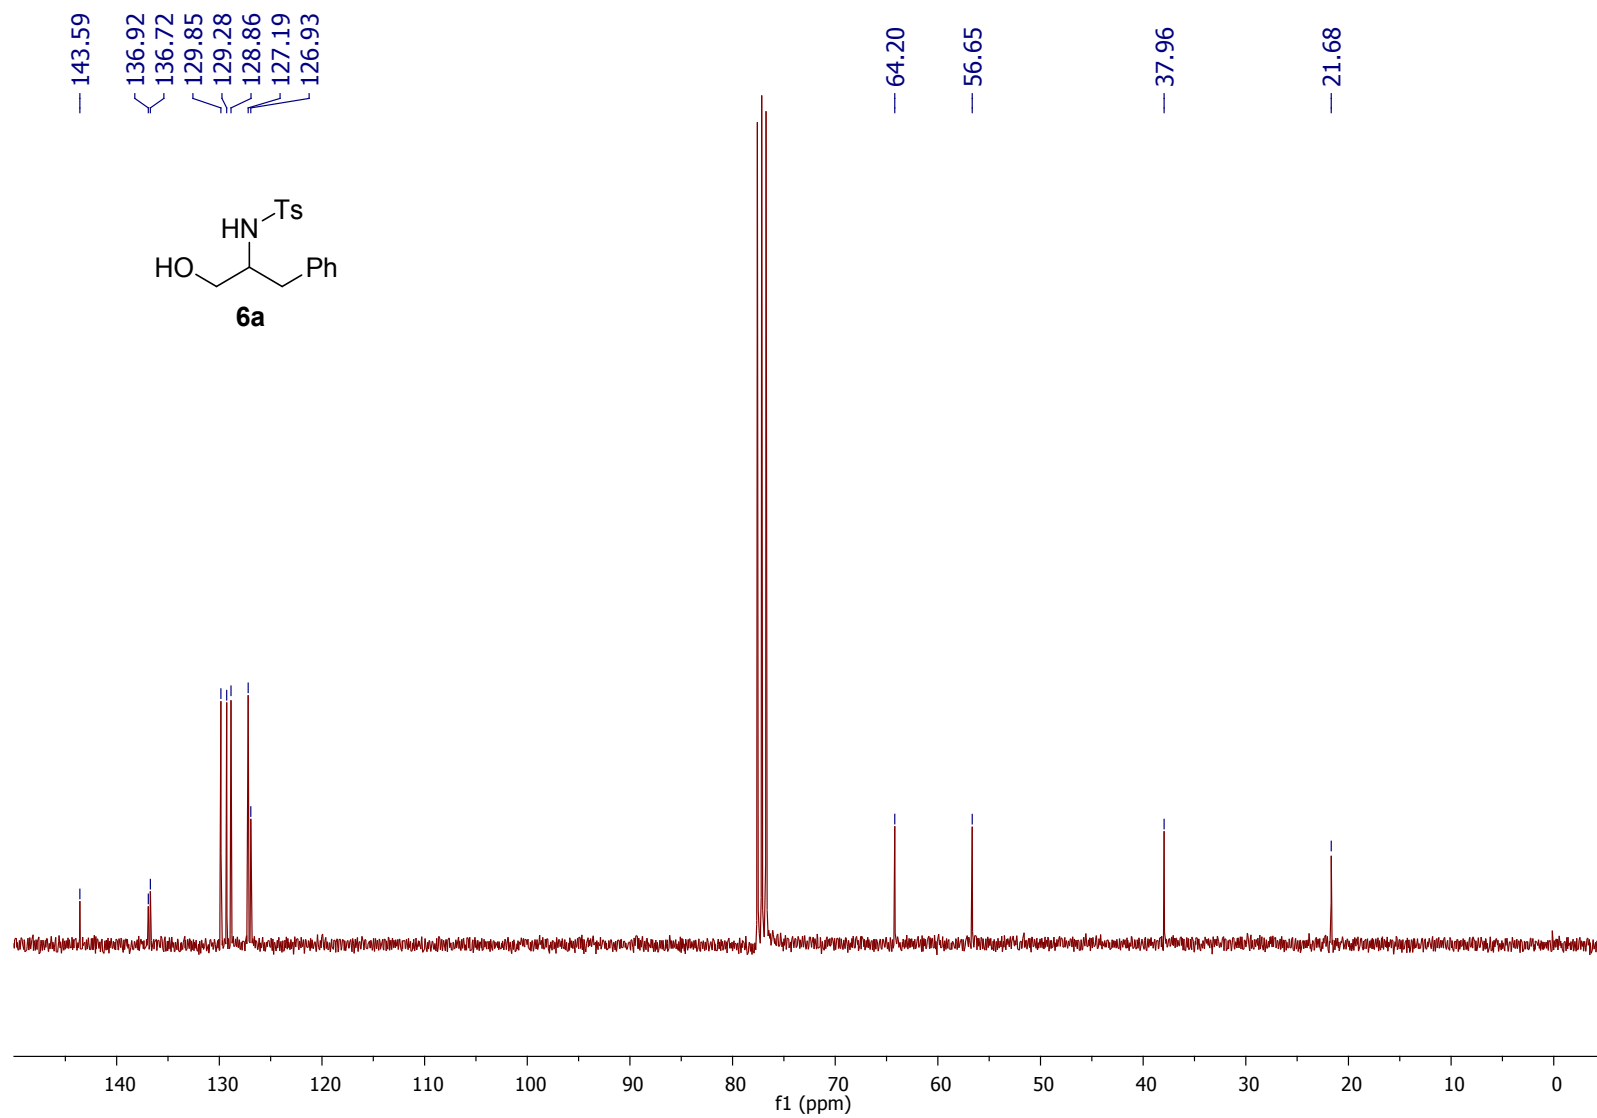



<sup>1</sup>H NMR (300 MHz, CDCl<sub>3</sub>) of compound **7a**

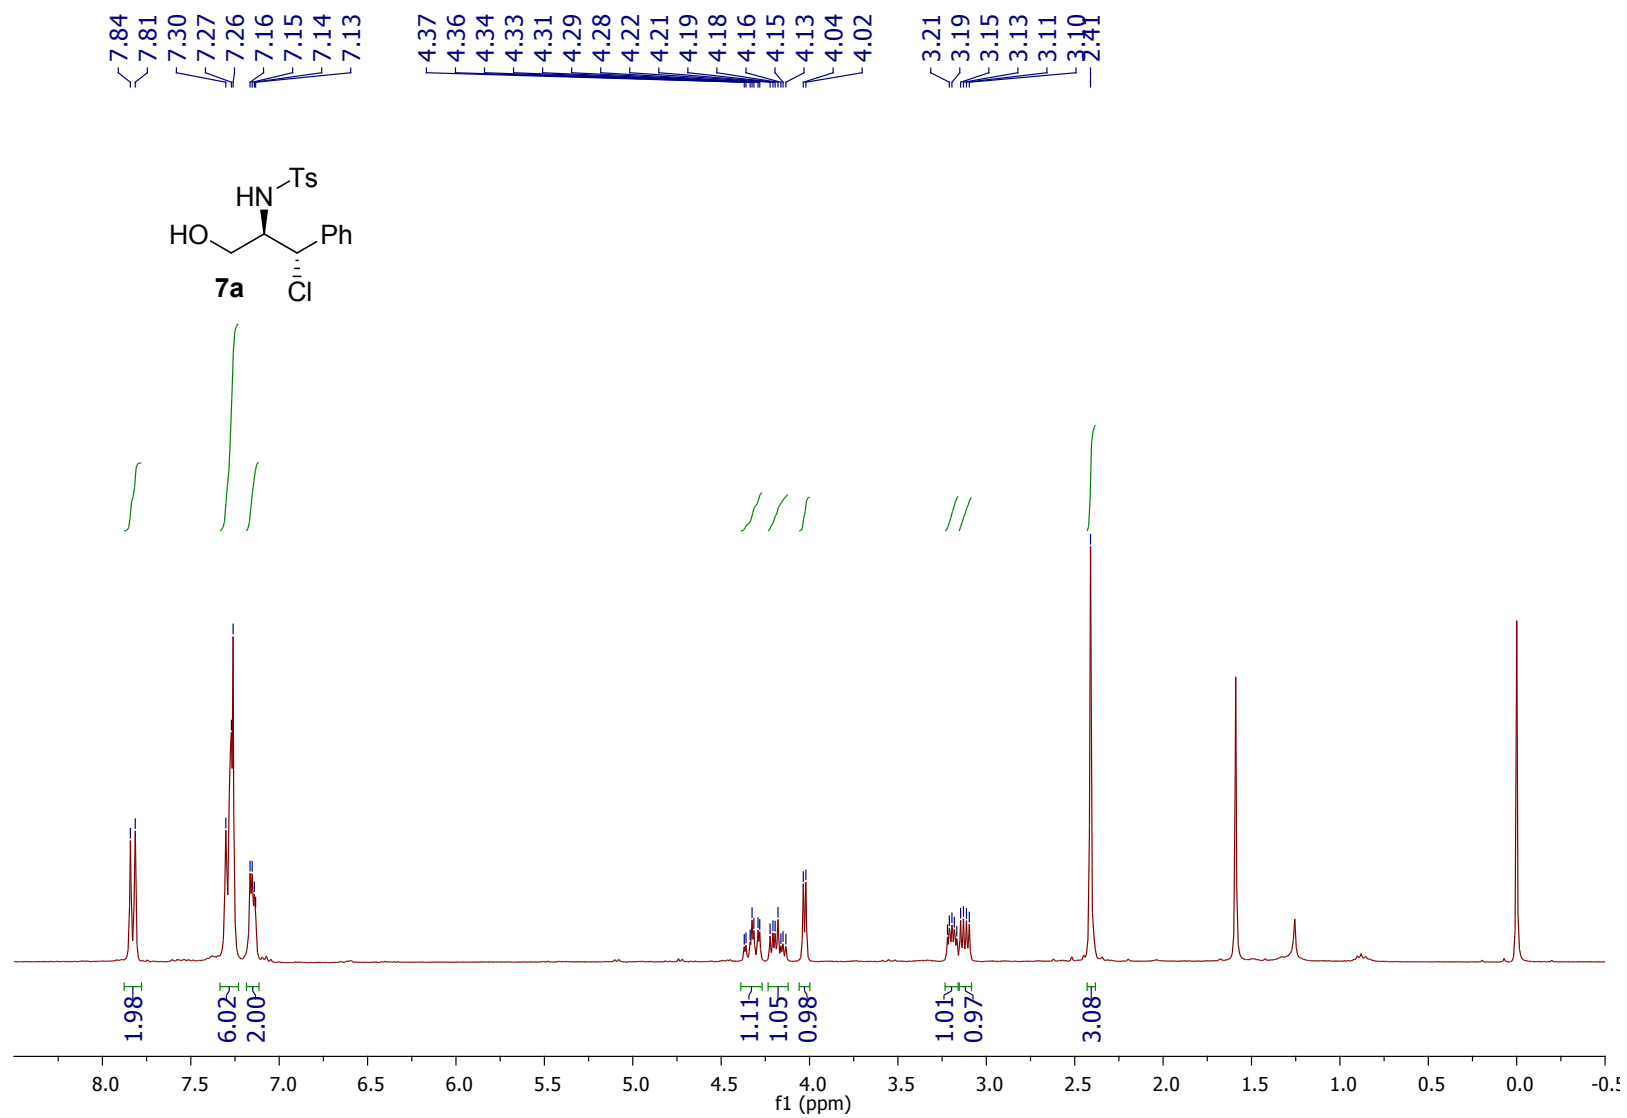

<sup>13</sup>C NMR (75 MHz, CDCl<sub>3</sub>) of compound **7a**

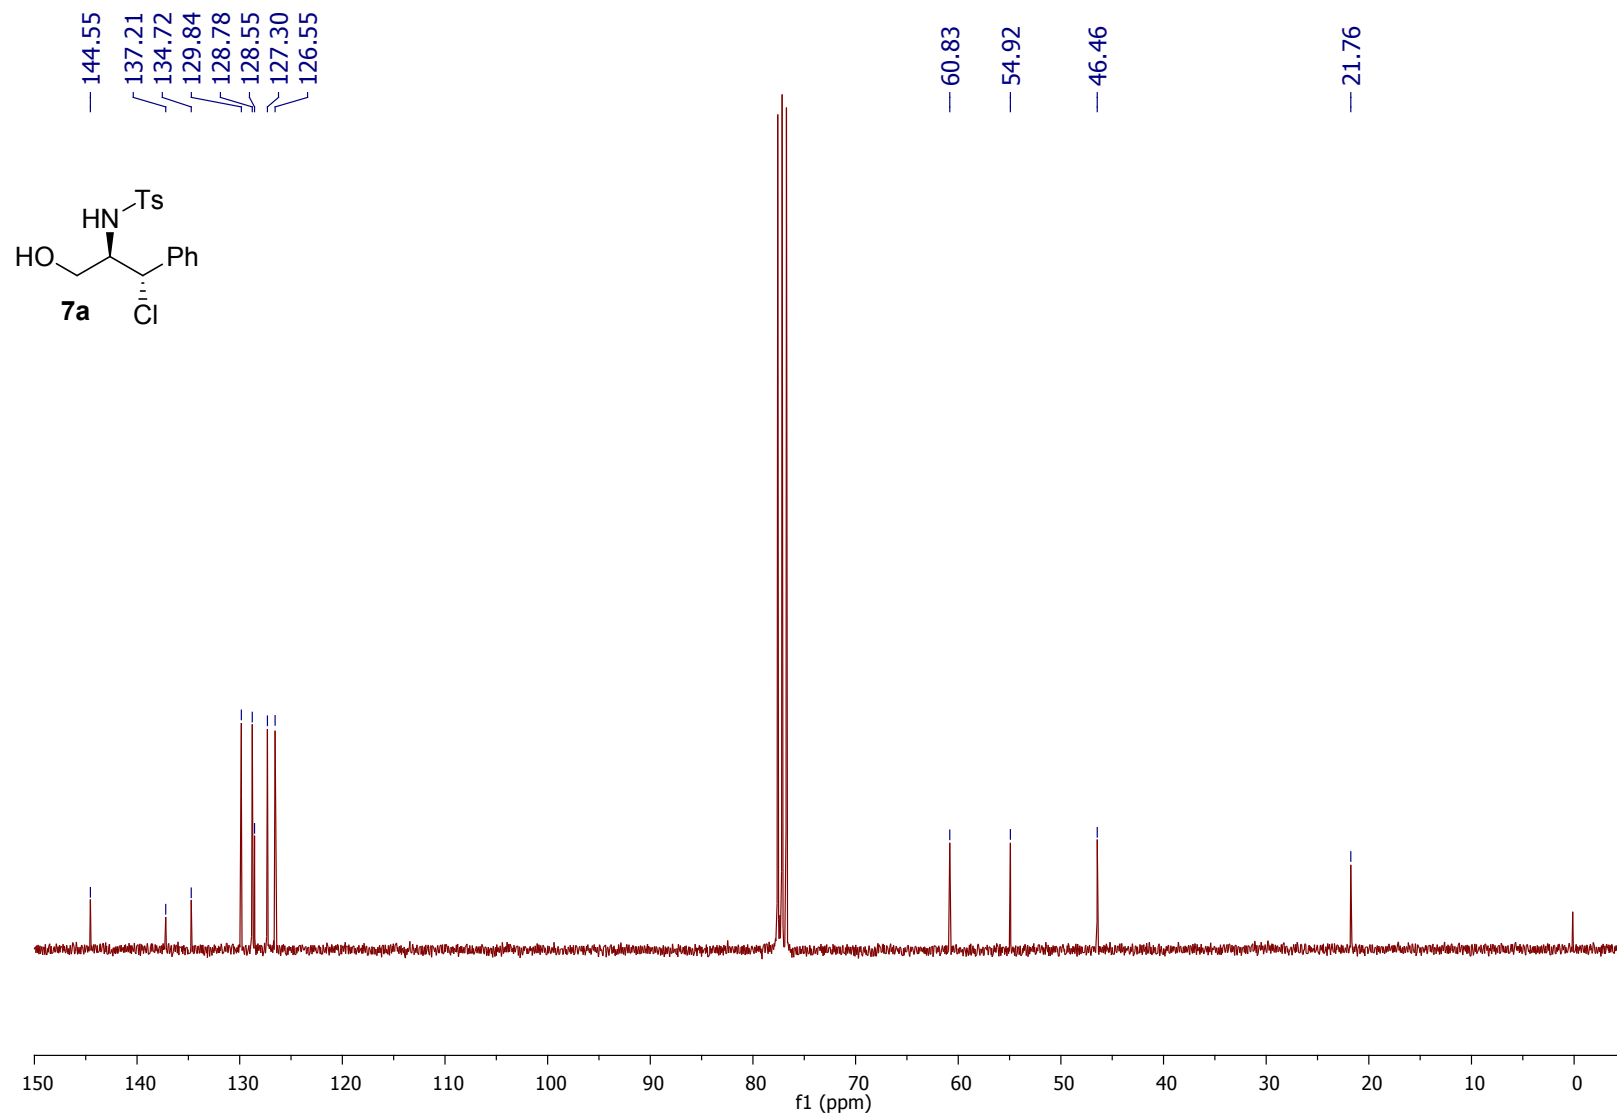

Supplement: d1ob00670c1.pdf [file d1ob00670c1.pdf]
